# Supplementary material for: In-Silico Drug discovery approach targeting receptor tyrosine kinase-like orphan receptor 1 for cancer treatment
Source: PubMed Central journal article supplement (PMC5430761; doi:10.1038/s41598-017-01254-w), 2017-04-21
Supplement: 41598_2017_1254_MOESM1_ESM.pdf [file 41598_2017_1254_MOESM1_ESM.pdf]

# *In-Silico* Drug discovery approach targeting receptor tyrosine kinase-like orphan receptor 1 for cancer treatment

Onkar Nath<sup>1</sup>, Archana Singh<sup>2</sup> and Indrakant K Singh<sup>3\*</sup>

<sup>1</sup>Jawaharlal Nehru University, SCIS, New Delhi - 110067, INDIA

<sup>2</sup>Department of Botany, Hans Raj College, University of Delhi, Delhi -110007, INDIA

<sup>1,3</sup>Mol Bio Res Lab, Deshbandhu College, University of Delhi, Kalkaji, New Delhi, 110019, INDIA

\*Present Address: Department of Entomology, University of Kentucky, S-225 AG. Science - North, Lexington, KY 40546-0001

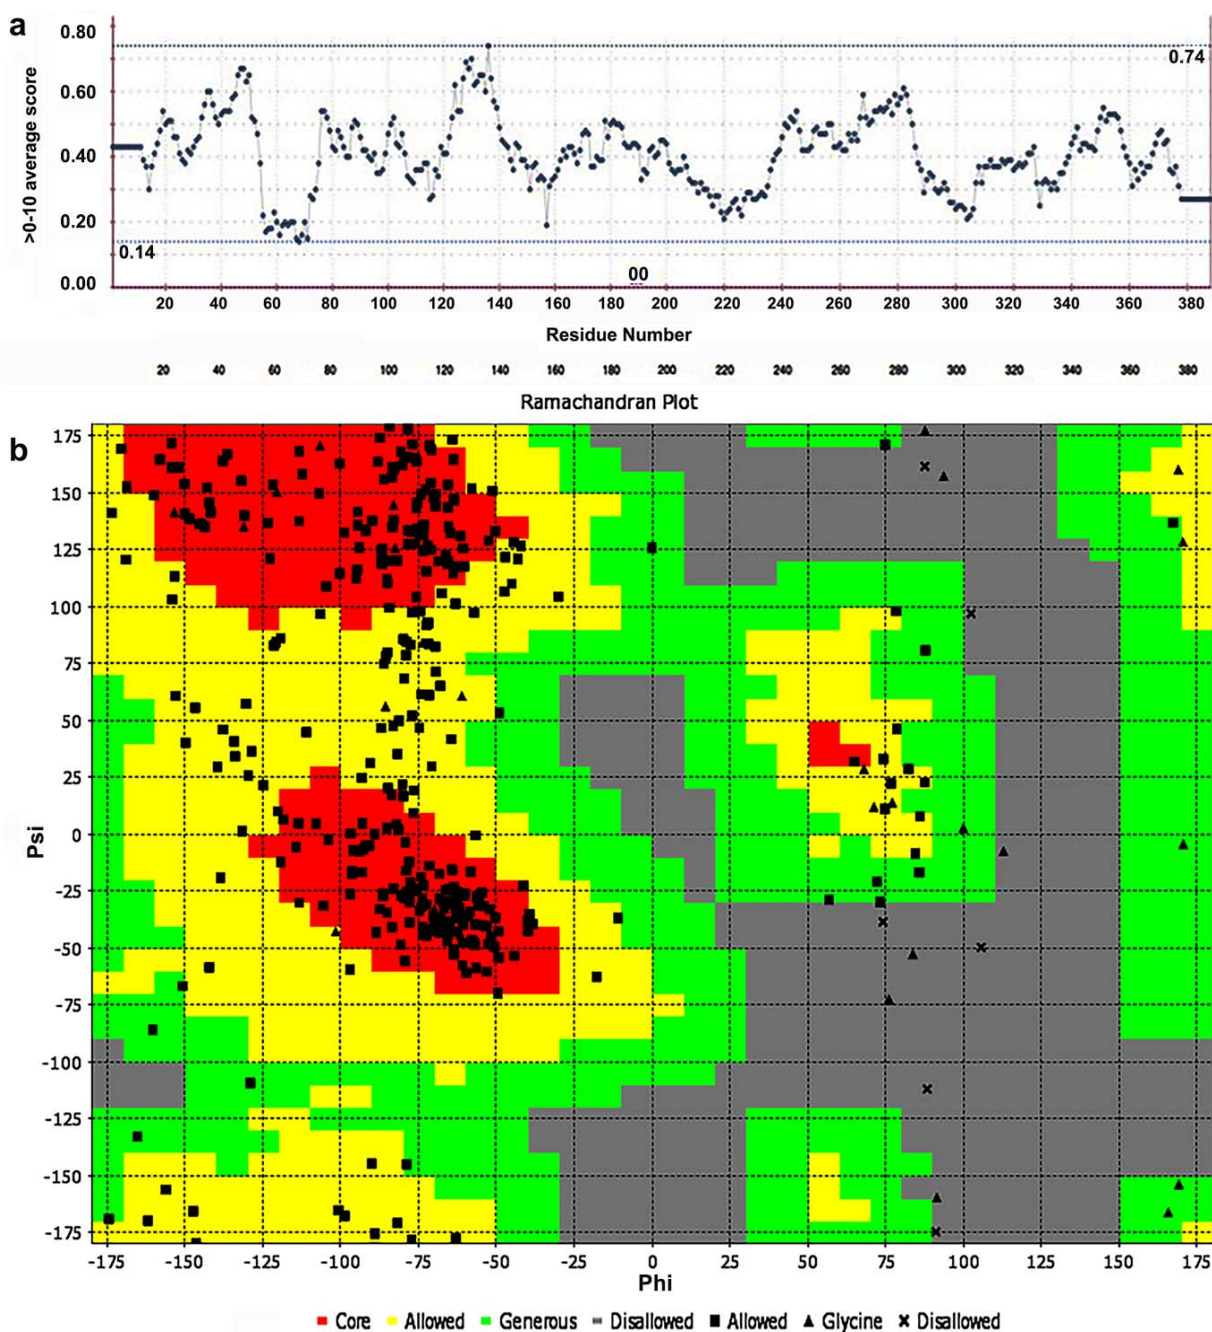

**Supplementary Figure S1. (a) 3D-1D average score plot per residue, (b) Ramachandran plot analysis of I-Tasser model.**

## Supplementary Table S1: Ligand names and corresponding smile notation

| Ligand Name | Smile                                                                               |
|-------------|-------------------------------------------------------------------------------------|
| ligand_131  | <chem>C1C[C@@H](CC[C@H]1C(=O)Nc1ccc(cc1)OC)CNC1=C(C(=O)C1=O)N1CCOCC1</chem>         |
| ligand_53   | <chem>C1=C(CCN(C1)CC(=O)Nc1ccc(cc1)OC)c1c[nH]c2ccc(cc12)OC</chem>                   |
| ligand_66   | <chem>C1(=O)[C@H](SC(=O)N1c1ccc(cc1)O)CC(=O)Nc1ccc(c(c1)O)C(=O)O</chem>             |
| ligand_42   | <chem>c1cc(cc2c3c(CCN(C(=O)CCC(=O)NC[C@@H]4CCCO4)C3)[nH]c12)OC</chem>               |
| ligand_43   | <chem>c1cc(cc2c3c(CCN(C(=O)CCC(=O)NC[C@@H]4CCCO4)C3)[nH]c12)OC</chem>               |
| ligand_44   | <chem>C1CN(CCC1c1cc([nH]n1)CC(=O)O)c1cc(nc(n1)N)N1CCOCC1</chem>                     |
| ligand_7    | <chem>N(c1cc(nc(N)n1)n1ccn1)CCC(=O)NCc1ccncc1</chem>                                |
| ligand_4    | <chem>c1cc(cc2c1c(cc(=O)o2)CC(=O)NCC(=O)NCC(=O)O)O</chem>                           |
| ligand_49   | <chem>O(C(=O)Cc1c2ccccc2c(=O)[nH]n1)Cc1c2ccc(c(c2oc(=O)c1)C)O</chem>                |
| ligand_9    | <chem>C(c1nc(on1)C(=O)NCCCO)Oc1ccc2c(c1)NC(=O)CC2</chem>                            |
| ligand_56   | <chem>C(=O)(NCc1cccnc1N1CCN(CC1)C)Cc1ccc2c(c1)NC(=O)CO2</chem>                      |
| ligand_91   | <chem>C(CC(=O)Nc1ccc(c(c1)Cl)OC)CC[C@@H]1[C@H]2[C@@H](CS1(=O)=O)NC(=O)N2</chem>     |
| ligand_84   | <chem>C1C[C@@H](CN(C1)CC(=O)Nc1ccc2OC0c2c1)C1=NN=C[C@H]1c1cc(C)no1</chem>           |
| ligand_92   | <chem>C(CC(=O)Nc1ccc(c(c1)Cl)OC)CC[C@@H]1[C@H]2[C@@H](CS1(=O)=O)NC(=O)N2</chem>     |
| ligand_5    | <chem>c1cc(cc2c1c(cc(=O)o2)CC(=O)NCC(=O)NCC(=O)O)O</chem>                           |
| ligand_60   | <chem>c1c(nc(s1)NC(=O)C1=CCC(=O)N=C1)CC(=O)Nc1ccc(cc1)C(=O)N</chem>                 |
| ligand_73   | <chem>c12c(CN(C(=O)c3ccc4c(cc[nH]4)c3)CC1)sc(n2)NC(=O)c1cncn1</chem>                |
| ligand_102  | <chem>[C@H](C(=O)N1CCC[C@H]1C(=O)NCC(=O)O)(Cc1c[nH]cn1)NC(=O)[C@H]1CCC(=O)N1</chem> |
| ligand_36   | <chem>[C@@H]1(C(=NC(=O)N[C@@H]1c1ccc(cc1)O)C)C(=O)NCCc1ccc(cc1)O</chem>             |
| ligand_177  | <chem>C1C=C(CC2=C1[C@@H](C1=C(N(C=N[C@@H]102)CCN1CCOCC1)N)c1ccc(cc1)OC)O</chem>     |
| ligand_65   | <chem>C1(=O)[C@H](SC(=O)N1c1ccc(cc1)O)CC(=O)Nc1ccc(c(c1)O)C(=O)O</chem>             |
| ligand_32   | <chem>c1cc(cc(c1)OC(=O)CC1=[S]C(=O)NC1=O)CC1=[S]C(=O)N=C1N</chem>                   |
| ligand_25   | <chem>C1CN(CCN1c1cc(=O)[nH]c(N)n1)C[C@@H]1[C@H](c2cc(ccc2N1)OC)C</chem>             |
| ligand_132  | <chem>C(C(=O)NCCc1cc(ccc1O)N(=O)=O)C(=O)NCCc1cc(ccc1O)N(=O)=O</chem>                |
| ligand_8    | <chem>C(#N)c1cnc(nc1N)SCc1c2ccc(c(c2oc(=O)c1)C)O</chem>                             |
| ligand_159  | <chem>c1c(nc(s1)NC(=O)C1=CCC(=O)N=C1)CC(=O)Nc1ccc(cc1)S(=O)(=O)N</chem>             |
| ligand_38   | <chem>[C@H]1(C(=NC(=O)N[C@H]1c1ccc(cc1)O)C)C(=O)NCCc1ccc(cc1)O</chem>               |
| ligand_14   | <chem>C(=O)(N1CCN(CC1)Cc1cccc(c1)NC(=O)C)c1ccc(cc1)O</chem>                         |
| ligand_30   | <chem>C(#N)c1c(cc(nc1N)c1cccc(c1)NC(=O)C)c1ccc(O)c(c1)OC</chem>                     |
| ligand_116  | <chem>c1cc2c(cc1C(=O)NCCCO)[C@H]1CCC[C@H]1[C@@H](N2)c1cc(ccc1O)N(=O)=O</chem>       |
| ligand_18   | <chem>c1c2CN(CCN2nc1CNC(=O)N(C)C)c1c2c[nH]nc2nc(n1)N</chem>                         |
| ligand_134  | <chem>C(C(=O)NCCc1cc(ccc1O)N(=O)=O)C(=O)NCCc1cc(ccc1O)N(=O)=O</chem>                |
| ligand_79   | <chem>c1(nc(no1)COc1ccc2CCC(=O)Nc2c1)C(=O)NCCc1ccc(cc1)O</chem>                     |
| ligand_22   | <chem>C(#CCO)c1cccc(c1)NC(=O)C)CNC(=O)c1ccc2cc[nH]c2c1</chem>                       |
| ligand_21   | <chem>C(#N)C1=C([C@H](C(=O)NC1=O)/C=N/c1ccc(cc1)S(=O)(=O)CCO)C</chem>               |
| ligand_74   | <chem>c12c(CN(C(=O)c3ccc4c(c3)nc[nH]4)CC1)sc(n2)NC(=O)c1cncn1</chem>                |
| ligand_86   | <chem>c1cc(cc(c1)OC1CCN(CC1)Cc1ccncc1)C(=O)N[C@H]1CC[C@H](CC1)O</chem>              |
| ligand_35   | <chem>c1cc(cc(c1)NC(=O)c1cccc(c1)O)NC(=O)c1cccc(c1)O</chem>                         |
| ligand_235  | <chem>c1(nc(=O)c2c(CN(CC2)Cc2ccc(c(c2)CN2CCN(CC2)C)O)[nH]1)c1ccncc1</chem>          |
| ligand_17   | <chem>c1c2CN(CCN2nc1CNC(=O)N(C)C)c1c2c[nH]nc2nc(n1)N</chem>                         |
| ligand_103  | <chem>[C@H](C(=O)N1CCC[C@H]1C(=O)NCC(=O)O)(Cc1c[nH]cn1)NC(=O)[C@H]1CCC(=O)N1</chem> |
| ligand_24   | <chem>c1cc2c(c(c1)NC(=O)C)CCN(C2)Cc1ccc(cc1N(=O)=O)C(=O)N</chem>                    |
| ligand_1    | <chem>C(#N)/C(=C(\C)/N)/C(=O)COC(=O)c1ccc2c(c1)NC(=O)CS2</chem>                     |
| ligand_19   | <chem>c1cc(ccc1[C@H](O)CC1CCN(CC1)C)NC(=O)c1ccc(=O)[nH]n1</chem>                    |

## Supplementary Table S1: Ligand names and corresponding smile notation

| Ligand Name | Smile                                                                              |
|-------------|------------------------------------------------------------------------------------|
| ligand_193  | <chem>C(c1csc(n1)NC(=O)[C@@H]1C=CC=NC1=O)C(=O)Nc1cc(ccc1OC)NC(=O)C</chem>          |
| ligand_40   | <chem>C1=C(CCN(C1)CC(=O)Nc1sc(C)nn1)c1c[nH]c2ccc(cc12)OC</chem>                    |
| ligand_167  | <chem>c1cc(ccc1CNNC(=O)c1ccc(cc1O)O)CNC(=O)c1ccc(cc1O)O</chem>                     |
| ligand_109  | <chem>c1cc(c(cc1CC1=[S]C(=NC1=O)N)OCC)OC(=O)C[C@@H]1C(=O)NC(=O)S1</chem>           |
| ligand_29   | <chem>C1CN(CCC1C(=O)Nc1cnn(c1)CC)Cc1cc(ccc1N(=O)=O)O</chem>                        |
| ligand_69   | <chem>C1(=O)[C@@H](SC(=O)N1c1ccc(cc1)O)CC(=O)Nc1ccc(cc1O)N(=O)=O</chem>            |
| ligand_67   | <chem>C1(=O)[C@H](SC(=O)N1c1cccc(c1)O)CC(=O)Nc1ccc(c(c1)O)C(=O)O</chem>            |
| ligand_71   | <chem>c1c(nc(s1)NC(=O)C1=CCC(=O)N=C1)CCC(=O)N1CC[C@@H](CC1)C(=O)N</chem>           |
| ligand_26   | <chem>c1cc(ccc1[C@H](C)NC(=O)N[C@H](C)CCCO)NC(=O)c1ccncc1</chem>                   |
| ligand_285  | <chem>c1c(c(n[nH]1)c1ccc(cc1)OC)/C=N/NC(=O)c1cc(ccc1O)O</chem>                     |
| ligand_88   | <chem>S(c1[nH]c(nn1)N/N=C/c1ccnc1)CCC(=O)Nc1cccc(c1)N(=O)=O</chem>                 |
| ligand_209  | <chem>c1cc(ccc1C(=O)NCCc1c[nH]c2ccccc12)OCC(=O)Nc1cccc(c1)OC</chem>                |
| ligand_39   | <chem>c1cc(ccc1CC(=O)N1CCC(CC1)O)NC(=O)Nc1ccc(cc1)OC</chem>                        |
| ligand_289  | <chem>c1(c(c(oc1c1ccc(cc1)NC(=O)C)/C=N/N)N(=O)=O)c1ccc(cc1)NC(=O)C</chem>          |
| ligand_45   | <chem>C(#N)c1cccc(c1)NC(=O)CN1CC=C(CC1)c1c[nH]c2ccc(cc12)OC</chem>                 |
| ligand_99   | <chem>C1=CC(=C[C@H]2C1=CC(=C(NC1=C(CC(=CC1)OC)OC)O2)C(=O)Nc1ccncc1)O</chem>        |
| ligand_158  | <chem>C1C[C@@H](CC[C@H]1C(=O)Nc1sc(nn1)CC)CNC1=C(C(=O)C1=O)N1CCCCC1</chem>         |
| ligand_54   | <chem>C1=C(CCN(C1)CC(=O)Nc1cccc(c1)OC)c1c[nH]c2ccc(cc12)OC</chem>                  |
| ligand_28   | <chem>C1CN(CCC1C(=O)Nc1cnn(c1)CC)Cc1cc(ccc1N(=O)=O)O</chem>                        |
| ligand_23   | <chem>c1cc(ccc1/C(=N\NC(=O)c1[nH]cnn1)/C)/N=C/c1ccc(cc1O)O</chem>                  |
| ligand_239  | <chem>c1cc(ccc1CNNC(=O)Cn1c(=S)[nH]c(C)n1)OC(=O)C[C@@H]1C(=O)NC(=O)S1</chem>       |
| ligand_6    | <chem>c1(nc(no1)COc1cccc(c1)NC(=O)C)C(=O)NCCCO</chem>                              |
| ligand_16   | <chem>C(#N)c1cnc(nc1N)SCc1c2cc(c(cc2oc(=O)c1)O)CC</chem>                           |
| ligand_61   | <chem>c1cc(ccc1CC(=O)N1CCC(CC1)O)NC(=O)Nc1ccc2OC0c2c1</chem>                       |
| ligand_139  | <chem>C(#N)c1c(N)oc2c(c(C)nn2)c1c1ccc(cc1)OCC(=O)Nc1ccc(cc1)OC</chem>              |
| ligand_70   | <chem>C(C#COc1cccc(c1)NC(=O)C)NC(=O)C(=O)c1c2ccccc2[nH]c1C</chem>                  |
| ligand_217  | <chem>c1cc(ccc1[C@H]1N(C(=O)CS1)c1ccc(cc1)O)OC(=O)C[C@H]1C(=O)NC(=O)S1</chem>      |
| ligand_15   | <chem>C(#N)c1cnc(nc1N)SCc1c2cc(c(cc2oc(=O)c1)O)CC</chem>                           |
| ligand_262  | <chem>c1(nnc(s1)NC(=O)c1ccc(cc1)OC)CC(=O)NNCc1ccc(O)c(c1)O</chem>                  |
| ligand_297  | <chem>C1CN(CCC1c1c[nH]c2ccc(cc12)OC)S(=O)(=O)c1ccc(cc1)NC(=O)N</chem>              |
| ligand_291  | <chem>c1cc(c(c2c1C(=O)/C(=C/c1ccc(cc1)N(=O)=O)/O2)CN1CCN(CC1)CCO)O</chem>          |
| ligand_197  | <chem>C(c1csc(n1)NC(=O)C1=CCC(=O)N=C1)C(=O)Nc1cc(ccc1OC)NC(=O)C</chem>             |
| ligand_195  | <chem>C(c1csc(n1)NC(=O)[C@@H]1C=CC=NC1=O)C(=O)Nc1cc(ccc1OC)NC(=O)C</chem>          |
| ligand_173  | <chem>C(C(=O)Nc1ccc(cc1)OC(F)(F)F)CCC[C@@H]1[C@H]2[C@@H](CS1(=O)=O)NC(=O)N2</chem> |
| ligand_154  | <chem>C(#N)c1c(N)oc2c(c(C)nn2)c1c1ccc(cc1)OCC(=O)Nc1cccc(c1)OC</chem>              |
| ligand_50   | <chem>c1cc(cc2c3c(CCN(C(=O)CCC(=O)NCc4ccnc4)C3)[nH]c12)OC</chem>                   |
| ligand_133  | <chem>C(C(=O)NNCc1cc(ccc1O)N(=O)=O)C(=O)NNCc1cc(ccc1O)N(=O)=O</chem>               |
| ligand_82   | <chem>c1cc(ccc1C(=O)Nc1ccncc1)NS(=O)(=O)c1ccc2c(c1)[nH]c(=O)[nH]2</chem>           |
| ligand_124  | <chem>C(=O)(N1CCC[C@@H](C1)c1ccc(en1)Nc1cncn1)CCc1c[nH]c2ccccc12</chem>            |
| ligand_130  | <chem>C1C[C@@H](CC[C@H]1C(=O)Nc1ccc(cc1)OC)CNC1=C(C(=O)C1=O)N1CCOCC1</chem>        |
| ligand_48   | <chem>C1=C(CCN(C(=O)Nc2ccc(cc2)OC)C1)c1c[nH]c2ccc(cc12)OC</chem>                   |
| ligand_13   | <chem>c1cc(c(c2c1c(cc(=O)o2)CC(=O)NCC(=O)NCC(=O)O)C)O</chem>                       |
| ligand_80   | <chem>c1cc(ccc1C(=O)N1CC[C@@H](CC1)C(=O)N)NC(=O)N[C@H]1CCS(=O)(=O)C1</chem>        |
| ligand_81   | <chem>c1cc(ccc1C(=O)N1CC[C@@H](CC1)C(=O)N)NC(=O)N[C@H]1CCS(=O)(=O)C1</chem>        |

## Supplementary Table S1: Ligand names and corresponding smile notation

| Ligand Name | Smile                                                                               |
|-------------|-------------------------------------------------------------------------------------|
| ligand_249  | <chem>c1(nnc(s1)NC(=O)c1ccc(cc1)OC)CC(=O)NNC1cccc(c1)O</chem>                       |
| ligand_166  | <chem>c1cc(ccc1CNNC(=O)c1ccc(cc1)O)CNC(=O)c1ccc(cc1)O</chem>                        |
| ligand_55   | <chem>C1=C(CCN(C1)CC(=O)Nc1cccc(c1)OC)c1c[nH]c2ccc(cc12)OC</chem>                   |
| ligand_75   | <chem>c1cc(c(cc1/C=C\1/C(=O)N=C(S1)N)OC)OC(=O)C[C@@H]1C(=O)NC(=O)S1</chem>          |
| ligand_108  | <chem>c1cc(c(cc1CC1=[S]C(=NC1=O)N)OCC)OC(=O)C[C@@H]1C(=O)NC(=O)S1</chem>            |
| ligand_148  | <chem>C(#N)c1c(N)oc2c(c(C)nn2)c1c1ccc(cc1)OCC(=O)Nc1cccc(c1)OC</chem>               |
| ligand_12   | <chem>c1cc(c(c2c1c(cc(=O)o2)CC(=O)NCC(=O)NCC(=O)O)C)O</chem>                        |
| ligand_113  | <chem>c1cc(cc(c1)S(=O)(=O)N1CCN(CC1)CC)NC(=O)Cn1ccc(=O)[nH]c1=O</chem>              |
| ligand_59   | <chem>c1cc(ccc1C(=O)N1CCC(CC1)O)OC1CCN(CC1)Cc1cccn1</chem>                          |
| ligand_243  | <chem>C(CC(=O)NNC1ccc(cc1)O)CC(=O)NNC1ccc(cc1)O</chem>                              |
| ligand_215  | <chem>c1cc(ccc1[C@@H]1N(C(=O)CS1)c1ccc(cc1)O)OC(=O)C[C@@H]1C(=O)NC(=O)S1</chem>     |
| ligand_72   | <chem>c12c(CN(C(=O)c3ccc4cc[nH]c4c3)CC1)sc(n2)NC(=O)c1cnccn1</chem>                 |
| ligand_155  | <chem>C(#N)c1c(N)oc2c(c(C)nn2)c1c1ccc(cc1)OCC(=O)Nc1cccc(c1)OC</chem>               |
| ligand_111  | <chem>c12c(CN(C(=O)c3ccc(cc3)NC(=O)C)CC1)sc(n2)NC(=O)c1cnccn1</chem>                |
| ligand_106  | <chem>[C@H](C(=O)N1CCC[C@H]1C(=O)NCC(=O)O)(Cc1c[nH]cn1)NC(=O)[C@H]1CCC(=O)N1</chem> |
| ligand_181  | <chem>c1cc(cc2c1C(=O)NC[C@H]1(CCC(=O)N(CC1)CC(=O)NCc1cncc1)O2)OC</chem>             |
| ligand_182  | <chem>C(=O)(N1CCC(CC1)C(=O)c1ccc2c(c1)NC(=O)CO2)c1ccc(o1)CN1CCCC1</chem>            |
| ligand_214  | <chem>c1cc(ccc1[C@@H]1N(C(=O)CS1)c1ccc(cc1)O)OC(=O)C[C@@H]1C(=O)NC(=O)S1</chem>     |
| ligand_96   | <chem>C1=CC(=C[C@H]2C1=CC(=C(Nc1ccc(c(c1)OC)OC)O2)C(=O)Nc1cncc1)O</chem>            |
| ligand_57   | <chem>c1cc(ccc1C(=O)N1CCC(CC1)O)OC1CCN(CC1)Cc1cccn1</chem>                          |
| ligand_78   | <chem>c1(nc(no1)COc1ccc2CCC(=O)Nc2c1)C(=O)NCCc1ccc(cc1)O</chem>                     |
| ligand_52   | <chem>c1cc(cc2c3c(CCN(C(=O)CCC(=O)NCc4ccnc4)C3)[nH]c12)OC</chem>                    |
| ligand_95   | <chem>C1=CC(=C[C@H]2C1=CC(=C(Nc1ccc(c(c1)OC)OC)O2)C(=O)Nc1cncc1)O</chem>            |
| ligand_141  | <chem>C(#N)c1c(N)oc2c(c(C)nn2)c1c1ccc(cc1)OCC(=O)Nc1ccc(cc1)OC</chem>               |
| ligand_187  | <chem>c1cc(ccc1NC(=O)N1CCC[C@H](C1)C(=O)NCC)NC(=O)Nc1ccc(cc1)OC</chem>              |
| ligand_231  | <chem>C1C[C@H](CC[C@H]1C(=O)Nc1sc(nn1)CC)CNC1=C(C(=O)C1=O)N1CC[C@H](CC1)C</chem>    |
| ligand_275  | <chem>C(#N)c1ccc(cc1)OCC(=O)N1CCC(CC1)C(=O)Nc1ccc(cc1)S(=O)(=O)N</chem>             |
| ligand_272  | <chem>c1cc(cc2c1c(cc(=O)o2)c1ccc(cc1)OC)OCC(=O)Nc1ccc2c(cc[nH]2)c1</chem>           |
| ligand_191  | <chem>C1C[C@H](CC[C@H]1C(=O)Nc1ccc(cc1)OC)CNC1=C(C(=O)C1=O)N1CC[C@H](CC1)C</chem>   |
| ligand_107  | <chem>[C@H](C(=O)N1CCC[C@H]1C(=O)NCC(=O)O)(Cc1c[nH]cn1)NC(=O)[C@H]1CCC(=O)N1</chem> |
| ligand_246  | <chem>c1cc(ccc1C(=O)NNC1ccc(cc1)O)NNC1ccc(cc1)O</chem>                              |
| ligand_255  | <chem>C1CN(CCC1C(=O)NNC1ccc(cc1)O)CC(=O)NNC1ccc(cc1)O</chem>                        |
| ligand_149  | <chem>C(#N)c1c(N)oc2c(c(C)nn2)c1c1ccc(cc1)OCC(=O)Nc1cccc(c1)OC</chem>               |
| ligand_117  | <chem>c1cc2c(cc1C(=O)NCCCOC)[C@H]1CCC[C@@H]1[C@@H](N2)c1cc(ccc1O)N(=O)=O</chem>     |
| ligand_143  | <chem>C(#N)c1c(N)oc2c(c(C)nn2)c1c1ccc(cc1)OCC(=O)Nc1ccc(cc1)OC</chem>               |
| ligand_101  | <chem>c1cc(c(cc1CNNC(=O)c1cncc1)COc1ccc(cc1)NC(=O)C)OC</chem>                       |
| ligand_286  | <chem>c1(nc2c(c(=O)[nH]1)CCN(C(=O)[C@@H](N)Cc1ccc(cc1)O)C2)c1cncc1</chem>           |
| ligand_100  | <chem>c1cc(c(cc1CNNC(=O)c1cncc1)COc1ccc(cc1)NC(=O)C)OC</chem>                       |
| ligand_150  | <chem>C(#N)c1c(N)oc2c(c(C)nn2)c1c1ccc(cc1)OCC(=O)Nc1cccc(c1)OC</chem>               |
| ligand_10   | <chem>C(c1nc(on1)C(=O)NCCCO)Oc1ccc2c(c1)NC(=O)CC2</chem>                            |
| ligand_225  | <chem>C(=O)(N1CC[C@@]2(CCCN(C2)Cc2cc(ccc2F)OC)C1)CCn1ccc(=O)[nH]c1=O</chem>         |
| ligand_68   | <chem>C1(=O)[C@H](SC(=O)N1c1cccc(c1)O)CC(=O)Nc1ccc(c(c1)O)C(=O)O</chem>             |
| ligand_137  | <chem>C(#N)c1c(N)oc2c(c(C)nn2)c1c1ccc(cc1)OCC(=O)Nc1ccc(cc1)OC</chem>               |
| ligand_2    | <chem>C(#N)CC(=O)NNC1ccc(c(c1)N(=O)=O)N1CCN(CC1)C</chem>                            |

## Supplementary Table S1: Ligand names and corresponding smile notation

| Ligand Name | Smile                                                                                |
|-------------|--------------------------------------------------------------------------------------|
| ligand_27   | <chem>c1[nH]c2c(CN(C(=O)COc3cccc(c3)NC(=O)CC)[C@H](C2)C(=O)O)n1</chem>               |
| ligand_279  | <chem>C(C(=O)NNCc1cccc(c1)O)CC(=O)NNCc1cccc(c1)O</chem>                              |
| ligand_123  | <chem>C(=O)(N1CCC[C@H](C1)c1ccc(cn1)Nc1cncn1)CCc1c[nH]c2cccc12</chem>                |
| ligand_3    | <chem>c1cc(cc2c1c(cc(=O)o2)CC(=O)NCC(=O)NCC(=O)O)O</chem>                            |
| ligand_252  | <chem>c1cc(oc1C(=O)N/N=C(\C)/c1ccc(cc1)O)C(=O)N/N=C(\C)/c1ccc(cc1)O</chem>           |
| ligand_128  | <chem>c12c(CN(C(=O)CCn3ccc(=O)[nH]c3=O)CC1)sc(n2)NC(=O)c1cncn1</chem>                |
| ligand_125  | <chem>C(=O)(N1CCC[C@H](C1)c1ccc(cn1)Nc1cncn1)CCc1c[nH]c2cccc12</chem>                |
| ligand_41   | <chem>c1cc(cc2c3c(CCN(C(=O)CCC(=O)NC[C@H]4CCCO4)C3)[nH]c12)OC</chem>                 |
| ligand_256  | <chem>C1CN(CCC1C(=O)NNCc1ccc(cc1)O)CC(=O)NNCc1ccc(cc1)O</chem>                       |
| ligand_206  | <chem>C1C[C@H](CC[C@H]1C(=O)Nc1ccc(cc1)OCC)CNC1=C(C(=O)C1=O)N1CCOCC1</chem>          |
| ligand_207  | <chem>C1C[C@H](CC[C@H]1C(=O)NCc1cccc1OC)CNC1=C(C(=O)C1=O)N1CCOCC1</chem>             |
| ligand_183  | <chem>C(=O)(NCCc1c2cc(ccc2[nH]c1)OC)[C@H]1CCN(CC1)[C@H]1Nc2cccnc2S1</chem>           |
| ligand_299  | <chem>C(#N)c1ccc(cc1)S(=O)(=O)N1CCN(CC1)Cc1ccc(cc1N(=O)=O)C(=O)N</chem>              |
| ligand_162  | <chem>c1cc(ccc1CNCC(=O)c1ccc(cc10)O)CNNC(=O)c1ccc(cc10)O</chem>                      |
| ligand_198  | <chem>C(c1csc(n1)NC(=O)C1=CCC(=O)N=C1)C(=O)Nc1cc(ccc1OC)NC(=O)C</chem>               |
| ligand_233  | <chem>c1(nc(=O)c2c(CN(CC2)Cc2ccc(c2)CN2CCN(CC2)C)O)[nH]1)c1ccncc1</chem>             |
| ligand_47   | <chem>[C@@H]12C(=NCN(C2)CCCOC2cccc(c2)NC(=O)C)N(C(=O)N(C1=O)C)C</chem>               |
| ligand_244  | <chem>c1cc(cc(c1)NNCc1ccc(cc1)O)C(=O)NNCc1ccc(cc1)O</chem>                           |
| ligand_259  | <chem>C1CN(CCC1C(=O)NNCc1ccc(cc1)O)CC(=O)NNCc1ccc(cc1)O</chem>                       |
| ligand_216  | <chem>c1cc(ccc1[C@H]1N(C(=O)CS1)c1ccc(cc1)O)OC(=O)C[C@H]1C(=O)NC(=O)S1</chem>        |
| ligand_126  | <chem>C(=O)(N1CCC[C@H](C1)c1ccc(cn1)Nc1cncn1)CCc1c[nH]c2cccc12</chem>                |
| ligand_104  | <chem>[C@@H](C(=O)N1CCC[C@H]1C(=O)NCC(=O)O)(Cc1c[nH]cn1)NC(=O)[C@H]1CCC(=O)N1</chem> |
| ligand_105  | <chem>[C@@H](C(=O)N1CCC[C@H]1C(=O)NCC(=O)O)(Cc1c[nH]cn1)NC(=O)[C@H]1CCC(=O)N1</chem> |
| ligand_169  | <chem>C(CCC(=O)Nc1cccc(c1)NC(=O)C)NC(=O)N1CC[C@H]2c3cccc3N[C@H]2C1</chem>            |
| ligand_122  | <chem>C(=O)(N1CCC[C@H](C1)c1ccc(cn1)Nc1cncn1)CCc1c[nH]c2cccc12</chem>                |
| ligand_114  | <chem>c1cc(cc(c1)S(=O)(=O)N1CCN(CC1)CC)NC(=O)Cn1ccc(=O)[nH]c1=O</chem>               |
| ligand_223  | <chem>c1c(cc(cc1C(=O)Nc1ccc(cc1)O)N1C(=O)CCC1=O)C(=O)Nc1ccc(cc1)O</chem>             |
| ligand_250  | <chem>c1(nnc(s1)NC(=O)c1ccc(cc1)OC)CC(=O)NNCc1ccc(cc1)O</chem>                       |
| ligand_51   | <chem>c1cc(cc2c3c(CCN(C(=O)CCC(=O)NCc4cccnc4)C3)[nH]c12)OC</chem>                    |
| ligand_138  | <chem>C(#N)c1c(N)oc2c(c(C)nn2)c1c1ccc(cc1)OCC(=O)Nc1ccc(cc1)OC</chem>                |
| ligand_236  | <chem>c1cc(ccc1CNCC(=O)Cn1c(=S)[nH]c(C)n1)OC(=O)C[C@H]1C(=O)NC(=O)S1</chem>          |
| ligand_120  | <chem>c1cc(ccc1NC(=O)N1CCC[C@H](C1)C(=O)NC)NC(=O)Nc1ccc(cc1)OC</chem>                |
| ligand_121  | <chem>c1(c(non1)C(=O)NNCc1ccc(cc10)O)C(=O)NNCc1ccc(cc10)O</chem>                     |
| ligand_119  | <chem>C(C(=O)Nc1ccc2[nH]c(=O)[nH]c2c1)OC(=O)c1ccc(c(c1)S(=O)(=O)N)Cl</chem>          |
| ligand_298  | <chem>C1CN(CCC1c1c[nH]c2ccc(cc12)OC)S(=O)(=O)c1ccc(cc1)NC(=O)N</chem>                |
| ligand_144  | <chem>C(#N)c1c(N)oc2c(c(C)nn2)c1c1ccc(cc1)OCC(=O)Nc1ccc(cc1)OC</chem>                |
| ligand_161  | <chem>c1cc(ccc1CNCC(=O)c1ccc(cc10)O)CNNC(=O)c1ccc(cc10)O</chem>                      |
| ligand_226  | <chem>C1C[C@H](CC[C@H]1C(=O)Nc1ccc(cc1)O)CNS(=O)(=O)c1ccc(cc1)NC(=O)C</chem>         |
| ligand_170  | <chem>C(CCCNC(=O)N[C@H]1CCS(=O)(=O)C1)CCNC(=O)N[C@H]1CCS(=O)(=O)C1</chem>            |
| ligand_280  | <chem>C1CN(CCC1C(=O)NNCc1ccc(cc1)O)CC(=O)NNCc1ccc(cc1)O</chem>                       |
| ligand_37   | <chem>[C@H]1(C(=NC(=O)N[C@H]1c1ccc(cc1)O)C)C(=O)NNCc1ccc(cc10)O</chem>               |
| ligand_188  | <chem>c1cc(ccc1NC(=O)N1CCC[C@H](C1)C(=O)NCC)NC(=O)Nc1ccc(cc1)OC</chem>               |
| ligand_31   | <chem>C(#N)c1c(cc(nc1N)c1cccc(c1)NC(=O)C)c1ccc(O)c(c1)OC</chem>                      |
| ligand_90   | <chem>c1cc(ccc1CC(=O)N1CCC(CC1)O)NC(=O)Nc1cc(cc(c1)OC)OC</chem>                      |



## Supplementary Table S1: Ligand names and corresponding smile notation

| Ligand Name | Smile                                                                          |
|-------------|--------------------------------------------------------------------------------|
| ligand_266  | <chem>c1c(c(C)nc(c1C(=O)NNCc1ccc(cc1)O)C)C(=O)NNCc1ccc(cc1)O</chem>            |
| ligand_160  | <chem>c1cc(ccc1CNNC(=O)c1ccc(cc1O)O)C(=O)NNCc1ccc(cc1O)O</chem>                |
| ligand_185  | <chem>c1cc(ccc1C(=O)NCCN1CCOCC1)N1CCC(CC1)NCCc1ccncc1</chem>                   |
| ligand_213  | <chem>c1cc(ccc1[C@H]1N(C(=O)CS1)c1ccc(cc1)O)OC(=O)C[C@@H]1C(=O)NC(=O)S1</chem> |
| ligand_63   | <chem>c1cc(ccc1CC(=O)N1CCC(CC1)O)NC(=O)Nc1ccc(cc1)OCC</chem>                   |
| ligand_64   | <chem>C1=C(CCN(C1)CC(=O)Nc1cccnc1Cl)c1c[nH]c2ccc(cc12)OC</chem>                |
| ligand_151  | <chem>C(#N)c1c(N)oc2c(c(C)nn2)c1c1ccc(cc1)OCC(=O)Nc1cccc(c1)OC</chem>          |
| ligand_210  | <chem>c1cc(ccc1C(=O)NCCc1c[nH]c2cccc12)OCC(=O)Nc1cccc(c1)OC</chem>             |
| ligand_145  | <chem>C(#N)c1c(N)oc2c(c(C)nn2)c1c1ccc(cc1)OCC(=O)Nc1ccc(cc1)OC</chem>          |
| ligand_83   | <chem>c1cc(ccc1C(=O)Nc1ccncc1)NS(=O)(=O)c1ccc2c(c1)[nH]c(=O)[nH]2</chem>       |
| ligand_175  | <chem>c1cc(cc2c1[C@H](C1=C(N(C=N[C@H]1O2)CCN1CCOCC1)N)c1ccc(cc1)OC)O</chem>    |
| ligand_240  | <chem>c1cc(cc(c1)S(=O)(=O)N1CC(=O)NCC1)NCC(=O)Nc1ccc(cc1)C(=O)N</chem>         |
| ligand_146  | <chem>C(#N)c1c(N)oc2c(c(C)nn2)c1c1ccc(cc1)OCC(=O)Nc1cccc(c1)OC</chem>          |
| ligand_245  | <chem>c1cc(ccc1C(=O)NNCc1ccc(cc1)O)NNCc1ccc(cc1)O</chem>                       |
| ligand_110  | <chem>C(=O)(NCCc1c[nH]c2ccc(cc12)OC)CCC(=O)Nc1ccc2[nH]c(=O)[nH]c2n1</chem>     |
| ligand_267  | <chem>c1c(c(C)nc(c1C(=O)NNCc1ccc(cc1)O)C)C(=O)NNCc1ccc(cc1)O</chem>            |
| ligand_98   | <chem>C1=CC(=C[C@H]2C1=CC(=C(Nc1ccc(cc1OC)OC)O2)C(=O)Nc1ccncc1)O</chem>        |
| ligand_196  | <chem>C(c1csc(n1)NC(=O)[C@H]1C=CC=NC1=O)C(=O)Nc1ccc(cc1OC)NC(=O)C</chem>       |
| ligand_228  | <chem>C1C[C@H](CC[C@H]1C(=O)Nc1cccc(c1)O)CNS(=O)(=O)c1ccc(cc1)NC(=O)C</chem>   |
| ligand_211  | <chem>c1cc(ccc1[C@H]1N(C(=O)CS1)c1ccc(cc1)O)OC(=O)C[C@@H]1C(=O)NC(=O)S1</chem> |
| ligand_261  | <chem>c1(nnc(s1)NC(=O)c1ccc(cc1)OC)CC(=O)NNCc1ccc(O)c(c1)O</chem>              |
| ligand_178  | <chem>N(C(=O)NCC(=O)Nc1cccc2c1nsn2)[C@H](C(=O)O)Cc1c[nH]c2cccc12</chem>        |
| ligand_168  | <chem>c1cc(cc2c3c(CCN(C(=O)CCC(=O)Nc4cccc(c4)NC(=O)C)C3)[nH]c12)OC</chem>      |
| ligand_93   | <chem>c1cc(ccc1C(=O)Nc1scnn1)NS(=O)(=O)c1ccc2c(c1)[nH]c(=O)[nH]2</chem>        |
| ligand_77   | <chem>c1cc(cc2c3c(CCN(C(=O)CCC(=O)Nc4cccc4OC)C3)[nH]c12)OC</chem>              |
| ligand_278  | <chem>C(#N)c1ccc(cc1)OCC(=O)N1CCC(CC1)C(=O)Nc1ccc(cc1)S(=O)(=O)N</chem>        |
| ligand_174  | <chem>c1cc(ccc1C1cc(nc(n1)C)N1CCOCC1)NC(=O)Nc1cccc1OC</chem>                   |
| ligand_165  | <chem>c1cc(ccc1CNNC(=O)c1ccc(cc1O)O)C(=O)NNCc1ccc(cc1O)O</chem>                |
| ligand_11   | <chem>c1cc(c(c2c1c(cc(=O)o2)CC(=O)NCC(=O)NCC(=O)O)C)O</chem>                   |
| ligand_163  | <chem>c1cc(ccc1CNNC(=O)c1ccc(cc1O)O)C(=O)NNCc1ccc(cc1O)O</chem>                |
| ligand_194  | <chem>C(c1csc(n1)NC(=O)[C@H]1C=CC=NC1=O)C(=O)Nc1ccc(cc1OC)NC(=O)C</chem>       |
| ligand_251  | <chem>c1cc(oc1C(=O)N/N=C(\C)/c1ccc(cc1)O)C(=O)N/N=C(\C)/c1ccc(cc1)O</chem>     |
| ligand_180  | <chem>c1cc(cc2c1C(=O)NC[C@@]1(CCC(=O)N(CC1)CC(=O)NCc1ccncc1)O2)OC</chem>       |
| ligand_115  | <chem>c1cc2c(cc1C(=O)NCCCOC)[C@H]1CCC[C@H]1[C@H](N2)c1cc(ccc1O)N(=O)=O</chem>  |
| ligand_295  | <chem>C(=O)(Nc1cc(ccc1C(=O)O)C(=O)O)C[C@@H]1C(=O)N(C(=O)S1)c1cccc(c1)O</chem>  |
| ligand_212  | <chem>c1cc(ccc1[C@H]1N(C(=O)CS1)c1ccc(cc1)O)OC(=O)C[C@@H]1C(=O)NC(=O)S1</chem> |
| ligand_192  | <chem>c1cc(ccc1C(=O)NCCN1CCC[C@H](C1)O)OC1CCN(CC1)Cc1cccn1</chem>              |
| ligand_230  | <chem>c1cc(ccc1CC(=O)Nc1cccc(c1)OC)NC1=N[C@@H]2CS(=O)(=O)C[C@@H]2S1</chem>     |
| ligand_20   | <chem>c1cc(ccc1[C@H](O)CC1CCN(CC1)C)NC(=O)c1ccc(=O)[nH]n1</chem>               |
| ligand_221  | <chem>c1cc(ccc1[C@H]1N(C(=O)CS1)c1ccc(cc1)O)OC(=O)C[C@@H]1C(=O)NC(=O)S1</chem> |
| ligand_142  | <chem>C(#N)c1c(N)oc2c(c(C)nn2)c1c1ccc(cc1)OCC(=O)Nc1ccc(cc1)OC</chem>          |
| ligand_205  | <chem>C1C[C@H](CC[C@H]1C(=O)Nc1ccc(cc1)OCC)CNC1=C(C(=O)C1=O)N1CCOCC1</chem>    |
| ligand_58   | <chem>c1cc(ccc1C(=O)N1CCC(CC1)O)OC1CCN(CC1)Cc1cccn1</chem>                     |
| ligand_292  | <chem>c1cc(c(c2c1C(=O)/C(=C/c1ccc(cc1)N(=O)=O)/O2)CN1CCN(CC1)CCO)O</chem>      |

## Supplementary Table S1: Ligand names and corresponding smile notation

| Ligand Name | Smile                                                                           |
|-------------|---------------------------------------------------------------------------------|
| ligand_234  | <chem>c1(nc(=O)c2c(CN(CC2)Cc2ccc(c2)CN2CCN(CC2)C)O)[nH]1)c1ccnc1</chem>         |
| ligand_274  | <chem>C(#N)c1ccc(cc1)OCC(=O)N1CCG(CC1)C(=O)Nc1ccc(cc1)S(=O)(=O)N</chem>         |
| ligand_283  | <chem>c1c(c(C)nc(c1C(=O)NNCc1ccc(cc1)O)C)C(=O)NNCc1ccc(cc1)O</chem>             |
| ligand_186  | <chem>C(=O)(N1CCN(CC1)c1cc(ncn1)Nc1cccn1)c1ccc(cc1)S(=O)(=O)N</chem>            |
| ligand_254  | <chem>C1CN(CCC1C(=O)NNCc1ccc(cc1)O)CC(=O)NNCc1ccc(cc1)O</chem>                  |
| ligand_268  | <chem>c1c(c(C)nc(c1C(=O)NNCc1ccc(cc1)O)C)C(=O)NNCc1ccc(cc1)O</chem>             |
| ligand_199  | <chem>[C@@H](c1ccc(cc1)OC)(c1c[nH]c2ccccc12)CNC(=O)c1ccc2c(c1)NC(=O)CO2</chem>  |
| ligand_87   | <chem>c1cc(ccc1[C@@H]1[C@H](N(C(=O)CO1)C1CCOCC1)CO)NC(=O)c1ccnc1</chem>         |
| ligand_294  | <chem>C(=O)(Nc1cc(ccc1C(=O)O)C(=O)O)C[C@@H]1C(=O)N(C(=O)S1)c1cccc(c1)O</chem>   |
| ligand_282  | <chem>c1c(c(C)nc(c1C(=O)NNCc1ccc(cc1)O)C)C(=O)NNCc1ccc(cc1)O</chem>             |
| ligand_260  | <chem>c1(nnc(s1)NC(=O)c1ccc(cc1)OC)CC(=O)NNCc1ccc(cc1)O</chem>                  |
| ligand_46   | <chem>C(#N)c1cccc(c1)NC(=O)CN1CC=C(CC1)c1c[nH]c2ccc(cc12)OC</chem>              |
| ligand_284  | <chem>c1c(c(C)nc(c1C(=O)NNCc1ccc(cc1)O)C)C(=O)NNCc1ccc(cc1)O</chem>             |
| ligand_264  | <chem>c1c(c(C)nc(c1C(=O)NNCc1ccc(cc1)O)C)C(=O)NNCc1ccc(cc1)O</chem>             |
| ligand_281  | <chem>C1CN(CCC1C(=O)NNCc1ccc(cc1)O)CC(=O)NNCc1ccc(cc1)O</chem>                  |
| ligand_171  | <chem>C(CCCNC(=O)N[C@H]1CCS(=O)(=O)C1)CCNC(=O)N[C@H]1CCS(=O)(=O)C1</chem>       |
| ligand_129  | <chem>C1C[C@H](CC[C@H]1C(=O)Nc1ccc(cc1)OC)CNC1=C(C(=O)C1=O)N1CCOCC1</chem>      |
| ligand_208  | <chem>C1C[C@H](CC[C@H]1C(=O)NCc1ccccc1OC)CNC1=C(C(=O)C1=O)N1CCOCC1</chem>       |
| ligand_152  | <chem>C(#N)c1c(N)oc2c(c(C)nn2)c1c1ccc(cc1)OCC(=O)Nc1cccc(c1)OC</chem>           |
| ligand_157  | <chem>c1cc(cc(c1)S(=O)(=O)N1CC(=O)NCC1)NCC(=O)Nc1ccc(cc1)OCC</chem>             |
| ligand_290  | <chem>c1cc(c(c2c1C(=O)/C=C/c1ccc(cc1)N(=O)=O)/O2)CN1CCN(CC1)CCO)O</chem>        |
| ligand_224  | <chem>c1cc(oc1C(=O)Nc1cccc(c1)NC(=O)C1CC1)COc1ccc2c(c1)CCC(=O)N2</chem>         |
| ligand_189  | <chem>C1C[C@H](CC[C@H]1C(=O)Nc1cccc(c1)C(=O)C)CNC1=C(C(=O)C1=O)N1CCOCC1</chem>  |
| ligand_258  | <chem>C1CN(CCC1C(=O)NNCc1ccc(cc1)O)CC(=O)NNCc1ccc(cc1)O</chem>                  |
| ligand_276  | <chem>C(#N)c1ccc(cc1)OCC(=O)N1CCG(CC1)C(=O)Nc1ccc(cc1)S(=O)(=O)N</chem>         |
| ligand_253  | <chem>c1cc(oc1C(=O)N/N=C(\C)/c1ccc(cc1)O)C(=O)N/N=C(\C)/c1ccc(cc1)O</chem>      |
| ligand_269  | <chem>c1c(c(C)nc(c1C(=O)NNCc1ccc(cc1)O)C)C(=O)NNCc1ccc(cc1)O</chem>             |
| ligand_33   | <chem>c1nc(c2c3c(CNCC3)sc2n1)N1CCC[C@H](C1)C(=O)NCCCCO</chem>                   |
| ligand_34   | <chem>c1cc(ccc1/C=C\1/C(=O)N=C(S1)N)OC(=O)C[C@@H]1C(=O)NC(=O)S1</chem>          |
| ligand_287  | <chem>c1(nc2c(c(=O)[nH]1)CCN(C(=O)[C@@H](N)Cc1ccc(cc1)O)C2)c1ccnc1</chem>       |
| ligand_112  | <chem>c12c(CN(C(=O)c3ccc(cc3)NC(=O)C)CC1)sc(n2)NC(=O)c1cncn1</chem>             |
| ligand_220  | <chem>c1cc(ccc1[C@@H]1N(C(=O)CS1)c1ccc(cc1)O)OC(=O)C[C@@H]1C(=O)NC(=O)S1</chem> |
| ligand_229  | <chem>C1C[C@H](CC[C@H]1C(=O)Nc1cccc(c1)O)CNS(=O)(=O)c1ccc(cc1)NC(=O)C</chem>    |
| ligand_300  | <chem>C(#N)c1ccc(cc1)S(=O)(=O)N1CCN(CC1)Cc1ccc(cc1)N(=O)=O)C(=O)N</chem>        |
| ligand_97   | <chem>C1=CC(=C[C@H]2C1=CC(=C(Nc1ccc(c(c1)OC)OC)O2)C(=O)Nc1ccncc1)O</chem>       |
| ligand_156  | <chem>C(#N)c1c(N)oc2c(c(C)nn2)c1c1ccc(cc1)OCC(=O)Nc1cccc(c1)OC</chem>           |
| ligand_135  | <chem>C1CN(CC1CC(=O)NC[C@H]1CCCO1)[C@H](c1c[nH]c2ccc(cc12)OC)C(=O)O</chem>      |
| ligand_202  | <chem>C1C[C@H](CC[C@H]1C(=O)Nc1ccc(cc1)OCC)CNC1=C(C(=O)C1=O)N1CCOCC1</chem>     |
| ligand_247  | <chem>c1cc(ccc1C(=O)NNCc1ccc(cc1)O)NNCc1ccc(cc1)O</chem>                        |
| ligand_204  | <chem>C1C[C@H](CC[C@H]1C(=O)Nc1ccc(cc1)OCC)CNC1=C(C(=O)C1=O)N1CCOCC1</chem>     |
| ligand_153  | <chem>C(#N)c1c(N)oc2c(c(C)nn2)c1c1ccc(cc1)OCC(=O)Nc1cccc(c1)OC</chem>           |
| ligand_164  | <chem>c1cc(ccc1CNCC(=O)c1ccc(cc1)O)CNCC(=O)c1ccc(cc1)O</chem>                   |
| ligand_179  | <chem>C(#N)[C@H]1C=C(C(=O)NC1=O)/C=N/c1ccc(cc1)S(=O)(=O)Nc1ccc(cc1)OC)C</chem>  |
| ligand_238  | <chem>c1cc(ccc1CNCC(=O)Cn1c(=S)[nH]c(C)n1)OC(=O)C[C@@H]1C(=O)NC(=O)S1</chem>    |

## Supplementary Table S1: Ligand names and corresponding smile notation

| Ligand Name | Smile                                                                              |
|-------------|------------------------------------------------------------------------------------|
| ligand_277  | <chem>C(#N)c1ccc(cc1)OCC(=O)N1CCC(CC1)C(=O)Nc1ccc(cc1)S(=O)(=O)N</chem>            |
| ligand_222  | <chem>c1cc(ccc1[C@@H]1N(C(=O)CS1)c1ccc(cc1)O)OC(=O)C[C@H]1C(=O)NC(=O)S1</chem>     |
| ligand_241  | <chem>c1cc(cc(c1)S(=O)(=O)N1CC(=O)NCC1)NCC(=O)Nc1ccc(cc1)C(=O)N</chem>             |
| ligand_242  | <chem>C(CC(=O)NNC1ccc(cc1)O)CC(=O)NNC1ccc(cc1)O</chem>                             |
| ligand_184  | <chem>C(=O)(NCCc1c2cc(ccc2[nH]c1)OC)[C@H]1CCN(CC1)[C@H]1Nc2ccnc2S1</chem>          |
| ligand_296  | <chem>C(=O)(Nc1cc(ccc1C(=O)O)C(=O)O)C[C@H]1C(=O)N(C(=O)S1)c1ccc(cc1)O</chem>       |
| ligand_127  | <chem>C(=O)(N1CCC[C@@H](C1)c1ccc(cn1)Nc1cnccn1)CCc1c[nH]c2ccccc12</chem>           |
| ligand_270  | <chem>c1c(c(C)nc(c1C(=O)NNC1ccc(cc1)O)C)C(=O)NNC1ccc(cc1)O</chem>                  |
| ligand_172  | <chem>C(C(=O)Nc1ccc(cc1)OC(F)(F)F)CCC[C@@H]1[C@H]2[C@@H](CS1(=O)=O)NC(=O)N2</chem> |
| ligand_273  | <chem>c1cc(cc2c1c(cc(=O)o2)c1ccc(cc1)OC)OCC(=O)Nc1ccc2c(cc[nH]2)c1</chem>          |
| ligand_136  | <chem>C1CN(CCN1CC(=O)NC[C@H]1CCC01)[C@H](c1c[nH]c2ccc(cc12)OC)C(=O)O</chem>        |
| ligand_271  | <chem>C1=NN=C([C@@H]1CN1CC[C@@H](CC1)N1CCC[C@@H](C1)CO)c1ccc2cc(ccc2c1)OC</chem>   |
| ligand_257  | <chem>C1CN(CCC1C(=O)NNC1ccc(cc1)O)CC(=O)NNC1ccc(cc1)O</chem>                       |
| ligand_263  | <chem>c1(nnc(s1)NC(=O)c1ccc(cc1)OC)CC(=O)NNC1ccc(O)c(c1)O</chem>                   |
| ligand_293  | <chem>c1cc(c(c2c1C(=O)/C(=C/c1cccc(c1)N(=O)=O)/O2)CN1CCN(CC1)CCO)O</chem>          |
| ligand_265  | <chem>c1c(c(C)nc(c1C(=O)NNC1ccc(cc1)O)C)C(=O)NNC1ccc(cc1)O</chem>                  |
| ligand_237  | <chem>c1cc(ccc1CNNC(=O)Cn1c(=S)[nH]c(C)n1)OC(=O)C[C@@H]1C(=O)NC(=O)S1</chem>       |
| ligand_203  | <chem>C1C[C@@H](CC[C@H]1C(=O)Nc1ccc(cc1)OCC)CNC1=C(C(=O)C1=O)N1CCOCC1</chem>       |
| ligand_201  | <chem>[C@@H](c1ccc(cc1)OC)(c1c2ccccc2[nH]c1)CNC(=O)c1ccc2c(c1)NC(=O)CO2</chem>     |
| ligand_200  | <chem>[C@H](c1ccc(cc1)OC)(c1c2ccccc2[nH]c1)CNC(=O)c1ccc2c(c1)NC(=O)CO2</chem>      |
| ligand_140  | <chem>C(#N)c1c(N)oc2c(c(C)nn2)c1c1ccc(cc1)OCC(=O)Nc1ccc(cc1)OC</chem>              |
| ligand_227  | <chem>C1C[C@@H](CC[C@H]1C(=O)Nc1ccc(cc1)O)CNS(=O)(=O)c1ccc(cc1)NC(=O)C</chem>      |
| ligand_89   | <chem>c1cc(ccc1CNNC(=O)c1cccc1O)OC(=O)C[C@H]1C(=O)NC(=O)S1</chem>                  |
| ligand_288  | <chem>c1c(c(nc2c1CN(C(=O)c1ccc(cc1)COC)CC2)N)C(=O)N1CCOCC1</chem>                  |
| ligand_232  | <chem>c1(nc(=O)c2c(CN(CC2)Cc2ccc(c2)CN2CCN(CC2)C)O)[nH]1)c1cccnc1</chem>           |
| ligand_147  | <chem>C(#N)c1c(N)oc2c(c(C)nn2)c1c1ccc(cc1)OCC(=O)Nc1cccc(c1)OC</chem>              |
| ligand_118  | <chem>c1[nH]c(c(n1)C(=O)NNC1ccc(c(c1)O)O)C(=O)NNC1ccc(O)c(c1)O</chem>              |
| ligand_76   | <chem>c1cc(cc2c3c(CCN(C(=O)CCC(=O)Nc4cccc4OC)C3)[nH]c12)OC</chem>                  |
| ligand_218  | <chem>c1cc(ccc1[C@H]1N(C(=O)CS1)c1ccc(cc1)O)OC(=O)C[C@@H]1C(=O)NC(=O)S1</chem>     |
| ligand_219  | <chem>c1cc(ccc1[C@H]1N(C(=O)CS1)c1ccc(cc1)O)OC(=O)C[C@@H]1C(=O)NC(=O)S1</chem>     |
| ligand_94   | <chem>C1=CC(=C[C@@H]2C1=CC(=C(NC1=C(CC=C(C1)OC)OC)O2)C(=O)Nc1cncc1)O</chem>        |
| ligand_176  | <chem>c1cc(cc2c1[C@H](C1=C(N(C=N[C@H]1O2)CCN1CCOCC1)N)c1ccc(cc1)OC)O</chem>        |
| ligand_62   | <chem>c1cc(ccc1CC(=O)N1CCC(CC1)O)NC(=O)Nc1ccc2OC0c2c1</chem>                       |
| ligand_190  | <chem>C1C[C@@H](CC[C@H]1C(=O)Nc1ccc(cc1)OCC)CNC1=C(C(=O)C1=O)N1CCCCC1</chem>       |
| ligand_248  | <chem>c1cc(ccc1C(=O)NNC1cccc(c1)O)NNC1cccc(c1)O</chem>                             |
| ligand_85   | <chem>C1C[C@H](CN(C1)CC(=O)Nc1ccc2OC0c2c1)C1=NN=C[C@@H]1c1cc(C)no1</chem>          |



Supplementary Table S2:

Detailed table of XP Docking using Schrodinger's Glide module

| ZINC_ID      | xLogP | ApolarDesolvation | PolarDesolvation | H Donors | H Acceptors | Charge | MolecularWeight | RotatableBonds | SMILES                                                                                 |
|--------------|-------|-------------------|------------------|----------|-------------|--------|-----------------|----------------|----------------------------------------------------------------------------------------|
| ZINC18249417 | 4.49  | 12.17             | -11.64           | 0        | 6           | 0      | 516.347         | 2              | Cc1cccc(c1)[C@@H]2[C@@H]3[C@@H]1[C@@H](C(=O)N(C3=O)c4cccc(c4)Br)C5(O2)C(=O)c6cccc6C5=O |
| ZINC20031600 | 2.96  | 5.41              | -8.05            | 2        | 4           | 0      | 326.581         | 3              | c1ccc(cc1)C1NCC(=O)c2cc(cnc2)Br                                                        |
| ZINC09365179 | 3.58  | 0.63              | -15.11           | 1        | 3           | 0      | 276.339         | 3              | Cc1cccc(c1)NC(=O)Cc2cccc2c2cccc3                                                       |
| ZINC19166762 | 2.91  | 9.65              | -35.59           | 1        | 4           | 1      | 289.399         | 6              | CC(=O)O[C@@H](CCN1CC2CC[NH+][1]CC2)c3cccc3                                             |
| ZINC01700294 | 4.13  | 4.41              | -31.48           | 1        | 2           | 1      | 279.407         | 5              | C/C@@H/[C]NH+/[C]C/[C]C#N/[C]1cccc1c2cccc2                                             |
| ZINC12378847 | 2.77  | 6.66              | -11.95           | 2        | 7           | 0      | 376.482         | 6              | C/C(=N)N=C/1\NC(=O)[C@@H](S1)CC(=O)Nc2cccc2OC)/C(C)(C)C                                |
| ZINC12378847 | 2.77  | 6.69              | -11.16           | 2        | 7           | 0      | 376.482         | 6              | C/C(=N)N=C/1\NC(=O)[C@@H](S1)CC(=O)Nc2cccc2OC)/C(C)(C)C                                |
| ZINC03901268 | 2.67  | 5.71              | -12.19           | 1        | 5           | 0      | 292.36          | 6              | Cc1cc(c[nH]c1n)SCC0c2cccc2OC                                                           |
| ZINC03901268 | 3.13  | 3.72              | -52.28           | 0        | 5           | -1     | 291.352         | 6              | Cc1cc(nc(n1)SCC0c2cccc2OC)[O-]                                                         |
| ZINC19799526 | 1.71  | 8.15              | -51.18           | 1        | 5           | 1      | 303.382         | 4              | CCOc1ccc(cc1)N2C(=O)C[C@@H](C2=O)NH+][3]CCCCC3                                         |
| ZINC19799526 | 1.71  | 5.89              | -10.19           | 0        | 5           | 0      | 302.374         | 4              | CCOc1ccc(cc1)N2C(=O)C[C@@H](C2=O)N3CCCCC3                                              |
| ZINC00982962 | 1.92  | -3.52             | -14.66           | 1        | 5           | 0      | 336.388         | 6              | CN(Cc1cccc1)C(=O)CNS(=O)[C@@H](C2=O)NH+][2]F                                           |
| ZINC19989886 | 1.16  | 8.03              | -54.39           | 3        | 7           | 1      | 377.49          | 8              | CC(NH+)[CC]CCN/C=C/1\C(=O)NC(=S)N(C1=O)c2cccc2OC                                       |
| ZINC08575396 | 2.27  | 6.7               | -13.19           | 2        | 6           | 0      | 332.429         | 4              | Cc1ccc(cc1)NC(=O)C[C@@H]2C(=O)N/C(=N)N=C(C)C)/S2)C                                     |
| ZINC08575396 | 2.27  | 6.74              | -12.42           | 2        | 6           | 0      | 332.429         | 4              | Cc1ccc(cc1)NC(=O)C[C@@H]2C(=O)N/C(=N)N=C(C)C)/S2)C                                     |
| ZINC19900070 | 0.73  | 1.75              | -47.33           | 4        | 8           | -1     | 372.308         | 4              | c1ccc(cc1)N2C(=O)C(=O)NCC(=O)N/C(=NC2=O)[O-][C](F)(F)F                                 |
| ZINC0556455  | 1.9   | 4.5               | -46.12           | 0        | 6           | -1     | 248.262         | 4              | CCc1c(nc2c(cmn2c1O-))C(=O)OCC)C                                                        |
| ZINC19900034 | 4.72  | 9.58              | -44.04           | 1        | 2           | -1     | 284.404         | 3              | CC(C)(C)c1ccc(cc1)C(=O)Nc2cccc2[S-]                                                    |
| ZINC19900034 | 4.72  | 9.05              | -6.7             | 1        | 2           | 0      | 285.412         | 3              | CC(C)(C)c1ccc(cc1)C(=O)Nc2cccc2S                                                       |
| ZINC01240782 | 2.25  | 4.48              | -17.47           | 2        | 5           | 0      | 268.729         | 2              | Cc1nnc(s1)NC(=O)Nc2ccc(cc2)Cl                                                          |
| ZINC01240782 | 1.88  | 1.84              | -33.93           | 1        | 5           | -1     | 267.721         | 3              | Cc1nnc(s1)/N=C(/N-)[c2ccc(cc2)Cl]O                                                     |
| ZINC19794473 | 3.01  | 7.51              | -10.17           | 2        | 5           | 0      | 374.849         | 5              | [H]/N=C/1\NC(=O)/C(=C/c2ccc(cc2)OC3cccc3C)OC)/S1                                       |
| ZINC05286115 | 3.33  | 10.24             | -18.62           | 0        | 6           | 0      | 354.464         | 4              | Cn1cnc1Sc2c(nc3cccc3n2)Se4nccn4C                                                       |
| ZINC05286115 | 3.33  | 10.59             | -32.99           | 1        | 6           | 1      | 355.472         | 4              | Cn1cnc1nH+][c1Sc2c(nc3cccc3n2)Se4nccn4C                                                |
| ZINC05286115 | 3.33  | 10.96             | -67.25           | 2        | 6           | 2      | 356.48          | 4              | Cn1cnc1nH+][c1Sc2c(nc3cccc3n2)Se4nH+][c1n4C                                            |
| ZINC00984053 | 2.52  | -5.29             | -7.54            | 1        | 4           | 0      | 263.728         | 1              | c1ccc2c(c1)ncf(c2n2)C)N3CC(C)C@H(C)C3)O                                                |
| ZINC05519407 | 2.9   | -5.15             | -8.88            | 1        | 4           | 0      | 277.755         | 2              | c1ccc2c(c1)ncf(c2n2)C)N3CC(C)C@H(C)C3)O                                                |
| ZINC02758246 | 6.38  | 15.41             | -19.05           | 1        | 5           | 0      | 458.602         | 7              | CC(C)C(C)C(=O)C1=C(NC2=O)C(=O)Nc1cccc1C                                                |
| ZINC02258599 | 1.28  | -4.1              | -47.85           | 4        | 6           | 1      | 341.453         | 9              | CCOC(=O)c1c2c(sc1nc(=O)CC)NH2+][CCO]CCCC3                                              |
| ZINC00841803 | 4.32  | 12.44             | -18.66           | 2        | 6           | 0      | 453.589         | 8              | CCOC(=O)CSC1=C(C)C(=O)Nc2cccc2C)C3ccc3C)C#N                                            |
| ZINC06182368 | 1.21  | -0.11             | -8.68            | 1        | 5           | 0      | 267.306         | 4              | COC1ccc2c(c1)NC(=O)C[C@@H](S2)CC(=O)OC                                                 |
| ZINC06219168 | 1.77  | 0.72              | -8.86            | 0        | 4           | 0      | 262.334         | 3              | Cn1c(=O)cc(n1=O)C)Sc2cccc2                                                             |
| ZINC19318821 | -3.35 | -2.85             | -23.39           | 4        | 10          | 0      | 206.114         | 2              | [C@@H]1([C@@H]1)NC(=C([N+]=[O-])O-)[N+]=[O-]O-][NH2+][1]O-]O-                          |
| ZINC19318821 | -3.35 | -2.27             | -47.96           | 3        | 10          | -1     | 205.106         | 2              | [C@@H]1([C@@H]1)NC(=C([N+]=[O-])O-)[N+]=[O-]O-][NH2+][1]O-]O-                          |
| ZINC19318821 | -3.35 | -3.36             | -102.98          | 2        | 10          | -2     | 204.998         | 2              | [C@@H]1([C@@H]1)NC(=C([N+]=[O-])O-)[N+]=[O-]O-][NH2+][1]O-]O-                          |
| ZINC02063189 | 5.08  | 11.41             | -20.93           | 1        | 7           | 0      | 512.002         | 9              | CC1=C([C@@H]1)C2=C(N1)C[C@@H](C2=O)c3ccc(cc3)C)C4ccc(cc4)OC)C(=O)OCCOC                 |
| ZINC18141403 | 2.31  | 8.2               | -14.32           | 2        | 5           | 0      | 339.42          | 4              | Cc1ccc(c1)N2C(=O)C[C@@H](C2=O)S/C(=N)c3cccc3)/N                                        |
| ZINC18141403 | 2.31  | 8.8               | -13.98           | 2        | 5           | 0      | 339.42          | 4              | Cc1ccc(c1)N2C(=O)C[C@@H](C2=O)S/C(=N)c3cccc3)/N                                        |
| ZINC18141403 | 2.31  | 8.2               | -13.89           | 2        | 5           | 0      | 339.42          | 4              | Cc1ccc(c1)N2C(=O)C[C@@H](C2=O)S/C(=N)c3cccc3)/N                                        |
| ZINC18141403 | 2.31  | 8.79              | -13.99           | 2        | 5           | 0      | 339.42          | 4              | Cc1ccc(c1)N2C(=O)C[C@@H](C2=O)S/C(=N)c3cccc3)/N                                        |
| ZINC18141403 | 2.44  | 9.28              | -13.93           | 2        | 5           | 0      | 339.42          | 5              | [H]/N=C(/Nc1cccc1)\S[C@@H]2CC(=O)N(C2=O)c3ccc(cc3)C                                    |
| ZINC18141403 | 2.44  | 8.65              | -13.03           | 2        | 5           | 0      | 339.42          | 5              | [H]/N=C(/Nc1cccc1)\S[C@@H]2CC(=O)N(C2=O)c3ccc(cc3)C                                    |
| ZINC18141403 | 2.44  | 9.17              | -13.4            | 2        | 5           | 0      | 339.42          | 5              | [H]/N=C(/Nc1cccc1)\S[C@@H]2CC(=O)N(C2=O)c3ccc(cc3)C                                    |
| ZINC18141403 | 2.44  | 8.64              | -12.4            | 2        | 5           | 0      | 339.42          | 5              | [H]/N=C(/Nc1cccc1)\S[C@@H]2CC(=O)N(C2=O)c3ccc(cc3)C                                    |
| ZINC08442295 | 4.11  | -4.47             | -19.97           | 2        | 9           | 0      | 520.592         | 6              | Cc1ccc(cc1)N2C(=O)C(=O)C(=O)c3ccc(cc3)c4ccc(cc4)S(=O)(=O)Nc5ncc5)/C(=O)N2              |
| ZINC08442294 | 3.52  | -4.76             | -19.86           | 2        | 9           | 0      | 506.565         | 6              | Cc1ccc(cc1)N2C(=O)C(=O)C(=O)c3ccc(cc3)c4ccc(cc4)S(=O)(=O)Nc5ncc5)/C(=O)N2              |
| ZINC08442293 | 3.42  | -4.5              | -21.41           | 2        | 7           | 0      | 430.917         | 6              | Cc1cc(nc1n)NS(=O)(=O)c2ccc(cc2)NC(=O)Cc3ccc(cc3)Cl)C                                   |
| ZINC08442288 | 6.22  | -5.13             | -18.19           | 2        | 2           | 0      | 518.447         | 6              | C/C(=N)N(C=O)c1c2ccc(cc2s1)Cl)Cl)/c3ccc(cc3)NS(=O)(=O)c4cccc4                          |
| ZINC00651582 | 6.03  | 8.28              | -16.14           | 2        | 8           | 0      | 547.416         | 9              | COC1cccc1NS(=O)(=O)c2ccc(cc2)NC(=O)c3ccc(cc3)OC4ccc(cc4)Cl)Cl                          |
| ZINC08442281 | 6.12  | -4.89             | -21.07           | 2        | 9           | 0      | 621.513         | 8              | CCOC1cccc1)c2ccc(cc2)Br)C(=O)Nc4ccc(cc4)S(=O)(=O)Nc5c(c(n5)C)C                         |
| ZINC00730699 | 3.09  | 0.08              | -55.73           | 2        | 10          | -1     | 434.498         | 7              | COC1cc(nc1n)OC)N-S(=O)(=O)c2ccc(cc2)NC(=O)NC3CCCC3                                     |
| ZINC00730699 | 3.27  | 1.2               | -17.92           | 3        | 10          | 0      | 435.506         | 6              | COC1c(c(=N)S(=O)(=O)c2ccc(cc2)NC(=O)NC3CCCC3)/nH)cf(n1)OC                              |
| ZINC08442279 | 1.84  | -15.66            | -20.82           | 4        | 11          | 0      | 510             | 7              | c1ccc(cc1)NS(=O)(=O)c2ccc(cc2)Cl)S(=O)(=O)Nc3nnc3)S(=O)(=O)N                           |
| ZINC08442278 | 4.74  | -6.73             | -18.53           | 2        | 6           | 0      | 430.551         | 6              | Cc1ccc(cc1)S(=O)(=O)Nc2ccc(cc2)NS(=O)(=O)c3ccc(cc3)C)C                                 |
| ZINC08442277 | 3.78  | -4.16             | -25.05           | 2        | 8           | 0      | 462.531         | 7              | Cc1ccc(nc1)NS(=O)(=O)c2ccc(cc2)NC(=O)COC3ccc4c3ccc4)C                                  |
| ZINC08442276 | 8.44  | -3.97             | -17.11           | 2        | 6           | 0      | 493.739         | 18             | CCCCCCCCCCCC(=O)Nc1ccc(cc1)S(=O)(=O)Nc2ncc2                                            |
| ZINC08442275 | 6.4   | -11.57            | -18.65           | 2        | 10          | 0      | 615.476         | 7              | c1ccc(cc1)S(=O)(=O)Nc2ncc3ccc(cc3o2)c4ccc5c(c4)oc(n5)NS(=O)(=O)c6ccc(cc6)Cl)Cl         |
| ZINC08442273 | 7.23  | -9.65             | -20.88           | 2        | 8           | 0      | 606.776         | 7              | Cc1ccc(cc1)S(=O)(=O)Nc2ncc3ccc(cc3s2)c4ccc5c(c4)sc(n5)NS(=O)(=O)c6ccc(cc6)C            |
| ZINC08442272 | 4.24  | -3.77             | -15.93           | 2        | 7           | 0      | 446.912         | 7              | COC1ccc(cc1)OC)NC(=O)c2ccc(cc2)S(=O)(=O)Nc3ccc(cc3)Cl                                  |
| ZINC08442271 | 4.77  | -5.8              | -7.28            | 1        | 3           | 0      | 411.14          | 3              | Cc1cc(ccc1)Br)NS(=O)(=O)c2ccc(cc2)S                                                    |
| ZINC08442270 | 4.9   | -1.25             | -46.33           | 2        | 4           | 1      | 422.961         | 4              | c1ccc(cc1)C)NH+][2]CCc3c(sc4c3c(=O)nH)cf(n4)C5ccc(cc5)Cl)C2                            |



Supplementary Table S2:

Detailed table of XP Docking using Schrodinger's Glide module

| ZINC_ID      | sLogP | ApolarDesolvation | PolarDesolvation | H Donors | H Acceptors | Charge | MolecularWeight | RotatableBonds | SMILES                                                                   |
|--------------|-------|-------------------|------------------|----------|-------------|--------|-----------------|----------------|--------------------------------------------------------------------------|
| ZINC02124700 | 7.02  | -1.68             | -14.01           | 1        | 6           | 0      | 517.434         | 7              | COc1cccc(c1)OCCOe2c(ccc2Cl)c3[nH]c(=O)c4c5c(sc4n3)CCCC5Cl                |
| ZINC08442219 | 4.41  | 3.54              | -4.45            | 0        | 2           | 0      | 222.291         | 2              | Cc1ccc(cc1)N=C=Ne2ccc(cc2)C                                              |
| ZINC02124697 | 6.59  | 12.81             | -12.97           | 1        | 4           | 0      | 485.378         | 4              | c1cc(ccc1)COC2ccc(cc2c3[nH]c(=O)c4c5c(sc4n3)CCCC5)Br]F                   |
| ZINC08442218 | 3.26  | -1.82             | -23.14           | 2        | 7           | 0      | 423.494         | 6              | CCOc1ccc(ccc1OCC(=O)N)/C=C/2[c(=O)n3c4ccc(c4c4n3s2)C]C                   |
| ZINC0634115  | 4.75  | -1.49             | -8               | 0        | 5           | 0      | 429.314         | 3              | Cc1c2ccc(ccc2oc1C(=O)N)N3CCN(C3)c4ccc(cc4)OC]Br                          |
| ZINC08442217 | 3.64  | -1.24             | -12.36           | 0        | 9           | 0      | 451.593         | 10             | CCCCCCCCn1c2c(nc1SCC(=O)N)N3CCOCC3n(c(=O)n(c2=O)C)C                      |
| ZINC08442217 | 3.64  | -0.99             | -47.62           | 1        | 9           | 1      | 452.601         | 10             | CCCCCCCCn1c2c([nH+]c1SCC(=O)N)N3CCOCC3n(c(=O)n(c2=O)C)C                  |
| ZINC0634040  | 5.1   | 2.96              | -13.91           | 0        | 6           | 0      | 467.521         | 8              | CCOc1ccc(ccc1OCc2ccccc2)C[C@@H]3c4c(=O)c5ccc5oc4C(=O)N3CC=C              |
| ZINC0634042  | 5.1   | 3                 | -13.9            | 0        | 6           | 0      | 467.521         | 8              | CCOc1ccc(ccc1OCc2ccccc2)C[C@@H]3c4c(=O)c5ccc5oc4C(=O)N3CC=C              |
| ZINC0634032  | 5.15  | 3.27              | -13.61           | 0        | 6           | 0      | 467.521         | 7              | Cc1ccc2c(c1)c(=O)c3(c(o2)C(=O)N)C[C@@H]3c4ccc(c4)OC)OC5ccc5)CC=C         |
| ZINC0634034  | 5.15  | 3.31              | -13.72           | 0        | 6           | 0      | 467.521         | 7              | Cc1ccc2c(c1)c(=O)c3(c(o2)C(=O)N)C[C@@H]3c4ccc(c4)OC)OC5ccc5)CC=C         |
| ZINC08442216 | 5.32  | -1.56             | -28.52           | 1        | 6           | 0      | 525.432         | 5              | Cc1ccc(cc1)NC(=O)COC2ccc(cc2)C[C@@H]3C4C(=NC5=C3C(=O)CCC5)CCCC4=O)Cl     |
| ZINC08442216 | 5.48  | -2.98             | -24.74           | 1        | 6           | 0      | 525.432         | 5              | Cc1ccc(cc1)NC(=O)COC2ccc(cc2)C[C@@H]3C4C(=NC5=C3C(=O)CCC5)CCCC4=O)Cl     |
| ZINC08442214 | 5.27  | 12.93             | -58.27           | 1        | 6           | -1     | 489.979         | 5              | Cc1cccc(c1)NC(=O)COC2ccc(cc2)C[C@@H]3C4=C(CCCC4=O)N=C5C3=C(CCC5)[O-]Cl   |
| ZINC08442214 | 4.85  | -2.87             | -23.19           | 1        | 6           | 0      | 490.987         | 5              | Cc1cccc(c1)NC(=O)COC2ccc(cc2)C[C@@H]3C4C(=NC5=C3C(=O)CCC5)CCCC4=O)Cl     |
| ZINC0634014  | 3.51  | -1                | -19.81           | 2        | 7           | 0      | 437.569         | 9              | Cn1c(mnc1SCC(=O)Nc2ccc(cc2)C)CCNC(=O)c3ccc3C                             |
| ZINC08442211 | 5.45  | -2.17             | -28.37           | 1        | 6           | 0      | 569.883         | 5              | Cc1ccc(cc1)NC(=O)COC2ccc(cc2)C[C@@H]3C4C(=NC5=C3C(=O)CCC5)CCCC4=O)Br     |
| ZINC08442211 | 5.61  | -3.6              | -24.69           | 1        | 6           | 0      | 569.883         | 5              | Cc1ccc(cc1)NC(=O)COC2ccc(cc2)C[C@@H]3C4C(=NC5=C3C(=O)CCC5)CCCC4=O)Br     |
| ZINC0634012  | 3.53  | -0.91             | -20.78           | 2        | 7           | 0      | 437.569         | 9              | Cn1c(mnc1SCC(=O)Nc2ccc(cc2)C)CCNC(=O)c3ccc3C                             |
| ZINC08442210 | 2.83  | -1.89             | -73.24           | 0        | 6           | -1     | 445.289         | 4              | c1ccc(c1)Br]C[C@@H]2C3C(=NC4=C2C(=O)CCC4)CCCC3=O)OCC(=O)O-]              |
| ZINC08442210 | 3     | -3.31             | -66.73           | 0        | 6           | -1     | 445.289         | 4              | c1ccc(c1)Br]C[C@@H]2C3C(=NC4=C2C(=O)CCC4)CCCC3=O)OCC(=O)O-]              |
| ZINC0634008  | 3.56  | -0.91             | -20.56           | 2        | 7           | 0      | 437.569         | 9              | Cn1c(mnc1SCC(=O)Nc2ccc(cc2)C)CCNC(=O)c3ccc3C                             |
| ZINC08442209 | 5.03  | -1.98             | -22.11           | 1        | 7           | 0      | 565.464         | 7              | CCOc1ccc(cc1OCc(=O)Nc2ccccc2)Br]C[C@@H]3C4C(=NC5=C3C(=O)CCC5)CCCC4=O     |
| ZINC08442209 | 5.19  | -3.19             | -19.62           | 1        | 7           | 0      | 565.464         | 7              | CCOc1ccc(cc1OCc(=O)Nc2ccccc2)Br]C[C@@H]3C4C(=NC5=C3C(=O)CCC5)CCCC4=O     |
| ZINC0634006  | 3.53  | -0.93             | -20.6            | 2        | 7           | 0      | 437.569         | 9              | Cn1c(mnc1SCC(=O)Nc2ccc(cc2)C)CCNC(=O)c3ccc3C                             |
| ZINC08442208 | 5.45  | -1.66             | -23.3            | 1        | 7           | 0      | 579.491         | 7              | CCOc1ccc(cc1OCc(=O)Nc2ccccc2)Br]C[C@@H]3C4C(=NC5=C3C(=O)CCC5)CCCC4=O     |
| ZINC08442208 | 5.62  | -2.87             | -19.07           | 1        | 7           | 0      | 579.491         | 7              | CCOc1ccc(cc1OCc(=O)Nc2ccccc2)Br]C[C@@H]3C4C(=NC5=C3C(=O)CCC5)CCCC4=O     |
| ZINC0634001  | 2.83  | 8.39              | -15.12           | 2        | 7           | 0      | 435.962         | 8              | Cn1c(mnc1SCC(=O)Nc2ccc(cc2)C)CCNC(=O)c3ccc3C                             |
| ZINC0633999  | 2.41  | -2.79             | -13.96           | 2        | 7           | 0      | 421.935         | 7              | Cn1c(mnc1SCC(=O)Nc2ccccc2)C)CCNC(=O)c3ccc3C                              |
| ZINC08442207 | 4.52  | -1.4              | -22.3            | 1        | 7           | 0      | 506.986         | 6              | COc1ccc(cc1OCc(=O)Nc2ccccc2)C]C[C@@H]3C4C(=NC5=C3C(=O)CCC5)CCCC4=O       |
| ZINC08442207 | 4.69  | -2.61             | -20.03           | 1        | 7           | 0      | 506.986         | 6              | COc1ccc(cc1OCc(=O)Nc2ccccc2)C]C[C@@H]3C4C(=NC5=C3C(=O)CCC5)CCCC4=O       |
| ZINC08442206 | 5.58  | -1.23             | -23.49           | 1        | 7           | 0      | 555.458         | 6              | Cc1ccc(cc1)NC(=O)COC2ccc(cc2)C]C[C@@H]3C4C(=NC5=C3C(=O)CCC5)CCCC4=O)OC   |
| ZINC08442206 | 5.74  | -2.45             | -21.37           | 1        | 7           | 0      | 555.458         | 6              | Cc1ccc(cc1)NC(=O)COC2ccc(cc2)C]C[C@@H]3C4C(=NC5=C3C(=O)CCC5)CCCC4=O)OC   |
| ZINC0633997  | 2.43  | -2.94             | -16.62           | 2        | 7           | 0      | 421.935         | 7              | Cn1c(mnc1SCC(=O)Nc2ccc(cc2)C)CCNC(=O)c3ccc3C                             |
| ZINC08442205 | 4.95  | -1.08             | -22.23           | 1        | 7           | 0      | 521.013         | 6              | Cc1cccc(c1)NC(=O)COC2c(ccc2)C]C[C@@H]3C4C(=NC5=C3C(=O)CCC5)CCCC4=O)OC    |
| ZINC08442205 | 5.11  | -2.29             | -19.9            | 1        | 7           | 0      | 521.013         | 6              | Cc1cccc(c1)NC(=O)COC2c(ccc2)C]C[C@@H]3C4C(=NC5=C3C(=O)CCC5)CCCC4=O)OC    |
| ZINC08442204 | 2.83  | -2.36             | -15.04           | 2        | 7           | 0      | 435.962         | 7              | Cc1ccc(cc1)NC(=O)COC2c(ccc2)C]C[C@@H]3C4C(=NC5=C3C(=O)CCC5)CCCC4=O)OC    |
| ZINC08442203 | 5.71  | -1.83             | -23.28           | 1        | 7           | 0      | 599.909         | 6              | Cc1ccc(cc1)NC(=O)COC2c(ccc2)C]C[C@@H]3C4C(=NC5=C3C(=O)CCC5)CCCC4=O)OC    |
| ZINC08442203 | 5.87  | -3.04             | -21.17           | 1        | 7           | 0      | 599.909         | 6              | Cc1ccc(cc1)NC(=O)COC2c(ccc2)C]C[C@@H]3C4C(=NC5=C3C(=O)CCC5)CCCC4=O)OC    |
| ZINC0633992  | 2.46  | 7.48              | -15.64           | 2        | 7           | 0      | 421.935         | 7              | Cn1c(mnc1SCC(=O)Nc2ccc(cc2)C)CCNC(=O)c3ccc3C                             |
| ZINC08442202 | 4.87  | -2.51             | -23.13           | 1        | 6           | 0      | 521.411         | 5              | c1ccc(cc1)NC(=O)COC2ccc(cc2)Br]C[C@@H]3C4C(=NC5=C3C(=O)CCC5)CCCC4=O      |
| ZINC08442202 | 5.03  | -3.59             | -20.21           | 1        | 6           | 0      | 521.411         | 5              | c1ccc(cc1)NC(=O)COC2ccc(cc2)Br]C[C@@H]3C4C(=NC5=C3C(=O)CCC5)CCCC4=O      |
| ZINC08442201 | 1.88  | -3.19             | -22.5            | 2        | 8           | 0      | 434.572         | 10             | C=Cn1c(mnc1SCC(=O)Nc2ccc(cc2)C)CCNC(=O)c3ccc3C                           |
| ZINC08442200 | 2.1   | -3.18             | -19.73           | 2        | 8           | 0      | 448.599         | 10             | Cc1ccc(cc1)NC(=O)COC2c(ccc2)C]C[C@@H]3C4C(=NC5=C3C(=O)CCC5)CCCC4=O       |
| ZINC08442199 | 5.29  | -2.2              | -22.99           | 1        | 6           | 0      | 535.438         | 5              | Cc1cccc(c1)NC(=O)COC2ccc(cc2)Br]C[C@@H]3C4C(=NC5=C3C(=O)CCC5)CCCC4=O     |
| ZINC08442199 | 5.46  | -3.28             | -20.18           | 1        | 6           | 0      | 535.438         | 5              | Cc1cccc(c1)NC(=O)COC2ccc(cc2)Br]C[C@@H]3C4C(=NC5=C3C(=O)CCC5)CCCC4=O     |
| ZINC08442198 | 1.24  | -3.8              | -23.65           | 2        | 8           | 0      | 408.534         | 8              | Cn1c(mnc1SCC(=O)Nc2ccc(cc2)C)CCNC(=O)c3ccc3C                             |
| ZINC08442197 | 5.98  | -1.89             | -22.79           | 1        | 7           | 0      | 646.909         | 6              | Cc1ccc(cc1)NC(=O)COC2c(ccc2)C]C[C@@H]3C4C(=NC5=C3C(=O)CCC5)CCCC4=O)OC    |
| ZINC08442197 | 6.15  | -3.1              | -20.6            | 1        | 7           | 0      | 646.909         | 6              | Cc1ccc(cc1)NC(=O)COC2c(ccc2)C]C[C@@H]3C4C(=NC5=C3C(=O)CCC5)CCCC4=O)OC    |
| ZINC08442196 | 1.46  | 6.59              | -21.11           | 2        | 8           | 0      | 422.561         | 8              | Cc1ccc(cc1)NC(=O)COC2c(ccc2)C]C[C@@H]3C4C(=NC5=C3C(=O)CCC5)CCCC4=O)OC    |
| ZINC08442195 | 3.57  | -2.38             | -72.88           | 0        | 6           | -1     | 524.185         | 4              | c1ccc(cc1)C[C@@H]2C3C(=NC4=C2C(=O)CCC4)CCCC3=O)OCC(=O)O-]Br]Br           |
| ZINC08442195 | 3.74  | -3.84             | -67.21           | 0        | 6           | -1     | 524.185         | 4              | c1ccc(cc1)C[C@@H]2C3C(=NC4=C2C(=O)CCC4)CCCC3=O)OCC(=O)O-]Br]Br           |
| ZINC08442194 | 1.83  | -3.62             | -19.97           | 2        | 8           | 0      | 436.588         | 9              | Cn1c(mnc1SCC(=O)Nc2ccc(cc2)C)CCNC(=O)c3ccc3C                             |
| ZINC0633984  | 4.19  | 7.74              | -17.78           | 2        | 6           | 0      | 437.294         | 6              | COc1ccc(cc1)e2nc([nH]n2)S(=O)(=O)Nc3ccc(cc3)F]Br                         |
| ZINC08442192 | 5.3   | -2.04             | -21.54           | 1        | 7           | 0      | 612.464         | 7              | CCOc1ccc(cc1OCc(=O)Nc2ccccc2)C]C[C@@H]3C4C(=NC5=C3C(=O)CCC5)CCCC4=O      |
| ZINC08442192 | 5.47  | -3.25             | -19.18           | 1        | 7           | 0      | 612.464         | 7              | CCOc1ccc(cc1OCc(=O)Nc2ccccc2)C]C[C@@H]3C4C(=NC5=C3C(=O)CCC5)CCCC4=O      |
| ZINC0633982  | 2.86  | -2.92             | -14.98           | 2        | 7           | 0      | 464.378         | 8              | Cn1c(mnc1SCC(=O)Nc2ccccc2)C)CCNC(=O)c3ccc3C                              |
| ZINC08442191 | 6.39  | -1.64             | -23.86           | 1        | 6           | 0      | 559.877         | 5              | Cc1ccc(cc1)NC(=O)COC2c(ccc2)C]C[C@@H]3C4C(=NC5=C3C(=O)CCC5)CCCC4=O)Cl    |
| ZINC08442191 | 6.56  | -3.09             | -20.35           | 1        | 6           | 0      | 559.877         | 5              | Cc1ccc(cc1)NC(=O)COC2c(ccc2)C]C[C@@H]3C4C(=NC5=C3C(=O)CCC5)CCCC4=O)Cl    |
| ZINC0633978  | 2.45  | -0.01             | -33              | 2        | 10          | 0      | 469.523         | 10             | Cn1c(mnc1SCC(=O)Nc2ccccc2)C)CCNC(=O)c3ccc3C                              |
| ZINC08442190 | 4.14  | 0.03              | -72.8            | 0        | 6           | -1     | 501.397         | 4              | CC1(CC2=NC3=C(C[C@@H](C2)C(=O)C1)c4ccc(ccc4OCC(=O)O-])Br]C(=O)CC(C3)(C)C |

Supplementary Table S2:

Detailed table of XP Docking using Schrodinger's Glide module

| ZINC_ID      | xLogP | ApolarDesolvation | PolarDesolvation | H Donors | H Acceptors | Charge | MolecularWeight | RotatableBonds | SMILES                                                                           |
|--------------|-------|-------------------|------------------|----------|-------------|--------|-----------------|----------------|----------------------------------------------------------------------------------|
| ZINC08442190 | 4.3   | 1.04              | -79.63           | 0        | 6           | -1     | 501.397         | 4              | CC1(CC2=NC3=CC(CCI=O)C3)C@H([C@@H]2C(=O)C1)e4ccc(ccc4OCC(=O)O)O-]Br](C)C)C       |
| ZINC08442190 | 4.3   | -0.17             | -68.01           | 0        | 6           | -1     | 501.397         | 4              | CC1(CC2=NC3=CC(CCI=O)C3)C@H([C@@H]2C(=O)C1)e4ccc(ccc4OCC(=O)O)O-]Br](C)C)C       |
| ZINC08442190 | 4.14  | 0.07              | -71.9            | 0        | 6           | -1     | 501.397         | 4              | CC1(CC2=NC3=CC(CCI=O)C3)C@H([C@@H]2C(=O)C1)e4ccc(ccc4OCC(=O)O)O-]Br](C)C)C       |
| ZINC08442189 | 2.19  | -1.56             | -81.76           | 2        | 10          | -1     | 454.488         | 9              | Cn1c[nnc1SCC(=O)Nc2cccc(c2)C(=O)O-]CC(=O)Nc3cccc(c3)OC                           |
| ZINC0633975  | 2.44  | -2.18             | -21.17           | 2        | 8           | 0      | 471.608         | 10             | Cn1c[nnc1SCC(=O)Nc2cccc(c2)SC]CNC(=O)Cc3cccc(c3)OC                               |
| ZINC08442188 | 5.57  | 0.18              | -26.01           | 1        | 6           | 0      | 533.068         | 5              | CC1(CC2=NC3=C([C@@H](C2C(=O)C1)e4ccc(ccc4OCC(=O)Nc5cccc5)C)C(=O)CC(C3)C)C)C      |
| ZINC08442188 | 5.57  | 0.22              | -25.33           | 1        | 6           | 0      | 533.068         | 5              | CC1(CC2=NC3=C([C@@H](C2C(=O)C1)e4ccc(ccc4OCC(=O)Nc5cccc5)C)C(=O)CC(C3)C)C)C      |
| ZINC08442188 | 5.73  | 1.2               | -30.62           | 1        | 6           | 0      | 533.068         | 5              | CC1(CC2=NC3=CC(CCI=O)C3)C@H([C@@H]2C(=O)C1)e4ccc(ccc4OCC(=O)Nc5cccc5)C)C)C)C     |
| ZINC08442188 | 5.73  | -0.02             | -23              | 1        | 6           | 0      | 533.068         | 5              | CC1(CC2=NC3=CC(CCI=O)C3)C@H([C@@H]2C(=O)C1)e4ccc(ccc4OCC(=O)Nc5cccc5)C)C)C)C     |
| ZINC0633972  | 3.07  | -0.6              | -27.24           | 2        | 8           | 0      | 463.922         | 8              | Cn1c[nnc1SCC(=O)Nc2cccc(c2)C)F]CC(=O)Nc3cccc(c3)OC                               |
| ZINC08442187 | 6.62  | 0.35              | -27.17           | 1        | 6           | 0      | 581.54          | 5              | Cc1ccc(cc1)NC(=O)C0c2cccc(c2)C@H]3C4C(=NC5=C3C(=O)CC(C5)(C)C)CC(C4=O)(C)C)C      |
| ZINC08442187 | 6.79  | -0.6              | -24.87           | 1        | 6           | 0      | 581.54          | 5              | Cc1ccc(cc1)NC(=O)C0c2cccc(c2)C@H]3C4C(=NC5=C3C(=O)CC(C5)(C)C)CC(C4=O)(C)C)C      |
| ZINC0633970  | 4.11  | 0.67              | -70.87           | 1        | 8           | -1     | 453.544         | 10             | Cc1ccc(ccc1O)CCc2nnc(n2)C)S)CC(=O)Nc3cccc(c3)C(=O)O-                             |
| ZINC08442186 | 4.01  | 0.64              | -72.78           | 0        | 6           | -1     | 456.946         | 4              | CC1(CC2=NC3=C([C@@H](C2C(=O)C1)e4ccc(ccc4OCC(=O)O)O-]C)C(=O)CC(C3)C)C)C          |
| ZINC08442186 | 4.17  | 1.66              | -79.54           | 0        | 6           | -1     | 456.946         | 4              | CC1(CC2=NC3=C([C@@H](C2C(=O)C1)e4ccc(ccc4OCC(=O)O)O-]C)C(=O)CC(C3)C)C)C          |
| ZINC08442186 | 4.17  | 0.43              | -67.97           | 0        | 6           | -1     | 456.946         | 4              | CC1(CC2=NC3=C([C@@H](C2C(=O)C1)e4ccc(ccc4OCC(=O)O)O-]C)C(=O)CC(C3)C)C)C          |
| ZINC08442186 | 4.01  | 0.68              | -71.84           | 0        | 6           | -1     | 456.946         | 4              | CC1(CC2=NC3=C([C@@H](C2C(=O)C1)e4ccc(ccc4OCC(=O)O)O-]C)C(=O)CC(C3)C)C)C          |
| ZINC08442185 | 3.44  | -1.52             | -23.91           | 2        | 8           | 0      | 478.603         | 8              | Cc1ccc(cc1)c2csc(n2)NC(=O)CSc3nnc(n3)C)CC(=O)Nc4cccc4                            |
| ZINC08442184 | 3.22  | -1.96             | -24.3            | 2        | 8           | 0      | 478.603         | 8              | Cc1c[nnc1]NC(=O)CSc2nnc(n2)C)CC(=O)Nc3cccc(c3)4cccc4                             |
| ZINC08442183 | 5.83  | 0.46              | -22.34           | 1        | 7           | 0      | 563.094         | 6              | CC1(CC2=NC3=C([C@@H](C2C(=O)C1)e4ccc(ccc4OCC(=O)Nc5cccc5)O)C)C(=O)CC(C3)C)C)C    |
| ZINC08442183 | 5.83  | 0.5               | -20.92           | 1        | 7           | 0      | 563.094         | 6              | CC1(CC2=NC3=C([C@@H](C2C(=O)C1)e4ccc(ccc4OCC(=O)Nc5cccc5)O)C)C(=O)CC(C3)C)C)C    |
| ZINC08442183 | 5.99  | 1.47              | -26.59           | 1        | 7           | 0      | 563.094         | 6              | CC1(CC2=NC3=CC(CCI=O)C3)C@H([C@@H]2C(=O)C1)e4ccc(ccc4OCC(=O)Nc5cccc5)O)C)C)C     |
| ZINC08442183 | 5.99  | 0.26              | -19.07           | 1        | 7           | 0      | 563.094         | 6              | CC1(CC2=NC3=CC(CCI=O)C3)C@H([C@@H]2C(=O)C1)e4ccc(ccc4OCC(=O)Nc5cccc5)O)C)C)C     |
| ZINC08442182 | 3     | -1.84             | -23.89           | 2        | 8           | 0      | 464.576         | 8              | Cn1c[nnc1SCC(=O)Nc2nnc(c2)C)cccc3)CC(=O)Nc4cccc4                                 |
| ZINC08442181 | 6.88  | 0.62              | -22.35           | 1        | 7           | 0      | 611.566         | 6              | Cc1ccc(cc1)NC(=O)C0c2cc(ccc2)C]C@H]3C4C(=NC5=C3C(=O)CC(C5)(C)C)CC(C4=O)(C)C)OC   |
| ZINC08442181 | 7.04  | -0.33             | -20.41           | 1        | 7           | 0      | 611.566         | 6              | Cc1ccc(cc1)NC(=O)C0c2cc(ccc2)C]C@H]3C4C(=NC5=C3C(=O)CC(C5)(C)C)CC(C4=O)(C)C)OC   |
| ZINC08442180 | 3.44  | -1.52             | -23.91           | 2        | 8           | 0      | 478.603         | 8              | Cc1ccc(cc1)NC(=O)CSc2nnc(n2)C)CC(=O)Nc3cccc(c3)4cccc4                            |
| ZINC08442179 | 6.25  | 0.78              | -21.1            | 1        | 7           | 0      | 577.121         | 6              | Cc1cccc(c1)NC(=O)C0c2cc(ccc2)C]C@H]3C4C(=NC5=C3C(=O)CC(C5)(C)C)CC(C4=O)(C)C)OC   |
| ZINC08442179 | 6.42  | -0.17             | -18.99           | 1        | 7           | 0      | 577.121         | 6              | Cc1cccc(c1)NC(=O)C0c2cc(ccc2)C]C@H]3C4C(=NC5=C3C(=O)CC(C5)(C)C)CC(C4=O)(C)C)OC   |
| ZINC0633968  | 3.81  | 10.34             | -23.98           | 2        | 7           | 0      | 478.405         | 8              | C]C@H]1CCCC[C@@H]1NC(=O)CSc2nnc(n2)C)CC(=O)Nc3cccc(c3)C)C)C                      |
| ZINC08442178 | 6.17  | -0.46             | -21.72           | 1        | 6           | 0      | 577.519         | 5              | CC1(CC2=NC3=C([C@@H](C2C(=O)C1)e4ccc(ccc4OCC(=O)Nc5cccc5)C(=O)CC(C3)C)C)C        |
| ZINC08442178 | 6.33  | -0.66             | -19.57           | 1        | 6           | 0      | 577.519         | 5              | CC1(CC2=NC3=CC(CCI=O)C3)C@H([C@@H]2C(=O)C1)e4ccc(ccc4OCC(=O)Nc5cccc5)C)C)C       |
| ZINC08442178 | 6.33  | 0.56              | -25.55           | 1        | 6           | 0      | 577.519         | 5              | CC1(CC2=NC3=CC(CCI=O)C3)C@H([C@@H]2C(=O)C1)e4ccc(ccc4OCC(=O)Nc5cccc5)C)C)C       |
| ZINC08442178 | 6.17  | -0.42             | -21.53           | 1        | 6           | 0      | 577.519         | 5              | CC1(CC2=NC3=C([C@@H](C2C(=O)C1)e4ccc(ccc4OCC(=O)Nc5cccc5)C(=O)CC(C3)C)C)C        |
| ZINC0633966  | 3.81  | 10.34             | -23.85           | 2        | 7           | 0      | 478.405         | 8              | C]C@H]1CCCC[C@@H]1NC(=O)CSc2nnc(n2)C)CC(=O)Nc3cccc(c3)C)C)C                      |
| ZINC08442177 | 6.6   | -0.15             | -21.69           | 1        | 6           | 0      | 591.546         | 5              | Cc1cccc(c1)NC(=O)C0c2cccc(c2)Br]C@H]3C4C(=NC5=C3C(=O)CC(C5)(C)C)CC(C4=O)(C)C     |
| ZINC08442177 | 6.76  | -1.1              | -19.37           | 1        | 6           | 0      | 591.546         | 5              | Cc1cccc(c1)NC(=O)C0c2cccc(c2)Br]C@H]3C4C(=NC5=C3C(=O)CC(C5)(C)C)CC(C4=O)(C)C     |
| ZINC0633964  | 3.25  | 9.48              | -24              | 2        | 7           | 0      | 464.378         | 8              | Cn1c[nnc1SCC(=O)Nc2cccc(c2)C]C(=O)Nc3cccc(c3)C)C)C                               |
| ZINC08442176 | 6.47  | 0.44              | -21.94           | 1        | 6           | 0      | 547.095         | 5              | Cc1cccc(c1)NC(=O)C0c2cccc(c2)C]C@H]3C4C(=NC5=C3C(=O)CC(C5)(C)C)CC(C4=O)(C)C      |
| ZINC08442176 | 6.63  | -0.51             | -19.68           | 1        | 6           | 0      | 547.095         | 5              | Cc1cccc(c1)NC(=O)C0c2cccc(c2)C]C@H]3C4C(=NC5=C3C(=O)CC(C5)(C)C)CC(C4=O)(C)C      |
| ZINC0633955  | 4     | -1.26             | -19.41           | 2        | 7           | 0      | 470.426         | 7              | C]C@H]1CCCC[C@@H]1NC(=O)CSc2nnc(n2)C)CC(=O)Nc3cccc(c3)C)C)C                      |
| ZINC0633958  | 4     | -1.77             | -23.33           | 2        | 7           | 0      | 470.426         | 7              | C]C@H]1CCCC[C@@H]1NC(=O)CSc2nnc(n2)C)CC(=O)Nc3cccc(c3)C)C)C                      |
| ZINC08442175 | 6.34  | -0.12             | -20.91           | 1        | 7           | 0      | 621.572         | 7              | CC0c1ccc(cc1O)CC(=O)Nc2cccc(c2)Br]C@H]3C4C(=NC5=C3C(=O)CC(C5)(C)C)CC(C4=O)(C)C   |
| ZINC08442175 | 6.5   | -1.07             | -18.84           | 1        | 7           | 0      | 621.572         | 7              | CC0c1ccc(cc1O)CC(=O)Nc2cccc(c2)Br]C@H]3C4C(=NC5=C3C(=O)CC(C5)(C)C)CC(C4=O)(C)C   |
| ZINC08442174 | 4     | -1.81             | -19.89           | 2        | 7           | 0      | 470.426         | 7              | C]C@H]1CCCC[C@@H]1NC(=O)CSc2nnc(n2)C)CC(=O)Nc3cccc(c3)C)C)C                      |
| ZINC08442173 | 6.76  | 0.2               | -22.08           | 1        | 7           | 0      | 635.599         | 7              | CC0c1ccc(cc1O)CC(=O)Nc2cccc(c2)C)Br]C@H]3C4C(=NC5=C3C(=O)CC(C5)(C)C)CC(C4=O)(C)C |
| ZINC08442173 | 6.92  | -0.75             | -18.3            | 1        | 7           | 0      | 635.599         | 7              | CC0c1ccc(cc1O)CC(=O)Nc2cccc(c2)C)Br]C@H]3C4C(=NC5=C3C(=O)CC(C5)(C)C)CC(C4=O)(C)C |
| ZINC0633962  | 4     | -1.26             | -19.42           | 2        | 7           | 0      | 470.426         | 7              | C]C@H]1CCCC[C@@H]1NC(=O)CSc2nnc(n2)C)CC(=O)Nc3cccc(c3)C)C)C                      |
| ZINC0633953  | 3.76  | -2.47             | -23.58           | 2        | 7           | 0      | 456.399         | 7              | Cn1c[nnc1SCC(=O)Nc2CCCC(c2)C]C(=O)Nc3cccc(c3)C)C)C                               |
| ZINC08442172 | 6     | 13.52             | -62.78           | 1        | 6           | -1     | 497.615         | 5              | CC1(CC2=C([C@@H](C3=C(C)C(C3=N2)C)C)O-]e4ccc(cc4)OCC(=O)Nc5cccc5)C(=O)C1)C       |
| ZINC08442172 | 5.57  | 1.23              | -33.68           | 1        | 6           | 0      | 498.623         | 5              | CC1(CC2=NC3=CC(CCI=O)C3)C@H([C@@H]2C(=O)C1)e4ccc(ccc4OCC(=O)Nc5cccc5)C)C)C       |
| ZINC08442172 | 5.57  | 0.02              | -25.86           | 1        | 6           | 0      | 498.623         | 5              | CC1(CC2=NC3=CC(CCI=O)C3)C@H([C@@H]2C(=O)C1)e4ccc(ccc4OCC(=O)Nc5cccc5)C)C)C       |
| ZINC08442172 | 5.41  | 0.3               | -28.8            | 1        | 6           | 0      | 498.623         | 5              | CC1(CC2=NC3=C([C@@H](C2C(=O)C1)e4ccc(ccc4OCC(=O)Nc5cccc5)C(=O)CC(C3)C)C)C        |
| ZINC08442171 | 2.83  | -2.51             | -25              | 2        | 8           | 0      | 471.395         | 7              | Cc1csc(n1)NC(=O)CSc2nnc(n2)C)CC(=O)Nc3cccc(c3)C)C)C                              |
| ZINC0633951  | 4.12  | 1.22              | -19.24           | 1        | 7           | 0      | 464.95          | 9              | CC0c1ccc(ccc1O)CCc2nnc(n2)C)S)CC(=O)Nc3cccc(c3)C)C)C                             |
| ZINC0633947  | 3.76  | 0.28              | -19.75           | 1        | 7           | 0      | 458.609         | 10             | CC0c1ccc(ccc1O)CCc2nnc(n2)C)S)CC(=O)Nc3cccc(c3)C)C)C                             |
| ZINC08442169 | 5.84  | 0.52              | -29.46           | 1        | 6           | 0      | 512.65          | 5              | Cc1cccc(c1)NC(=O)C0c2cccc(c2)C]C@H]3C4C(=NC5=C3C(=O)CC(C5)(C)C)CC(C4=O)(C)C      |
| ZINC08442169 | 6     | -0.46             | -25.62           | 1        | 6           | 0      | 512.65          | 5              | Cc1cccc(c1)NC(=O)C0c2cccc(c2)C]C@H]3C4C(=NC5=C3C(=O)CC(C5)(C)C)CC(C4=O)(C)C      |
| ZINC08442168 | 5.4   | 0.47              | -28.11           | 1        | 7           | 0      | 542.676         | 7              | CC0c1ccc(ccc1O)CC(=O)Nc2cccc(c2)C]C@H]3C4C(=NC5=C3C(=O)CC(C5)(C)C)CC(C4=O)(C)C   |
| ZINC08442168 | 5.56  | -0.52             | -24.51           | 1        | 7           | 0      | 542.676         | 7              | CC0c1ccc(ccc1O)CC(=O)Nc2cccc(c2)C]C@H]3C4C(=NC5=C3C(=O)CC(C5)(C)C)CC(C4=O)(C)C   |
| ZINC0633946  | 4.64  | -0.91             | -12.59           | 1        | 6           | 0      | 471.38          | 7              | Cn1c[nnc1SCC(=O)Nc2cccc(c2)C]c3ccc(ccc34O)Br                                     |

Supplementary Table S2:

Detailed table of XP Docking using Schrodinger's Glide module

| ZINC_ID      | xLogP | ApolarDesolvation | PolarDesolvation | H Donors | H Acceptors | Charge | MolecularWeight | RotatableBonds | SMILES                                                                       |
|--------------|-------|-------------------|------------------|----------|-------------|--------|-----------------|----------------|------------------------------------------------------------------------------|
| ZINC08442167 | 7.7   | 0.27              | -22.57           | 1        | 6           | 0      | 615.985         | 5              | Cc1ccc(cc1C)NC(=O)COC2C(C)C@H3C4C(=NC5=C3C(=O)CC(C5)C)CC(C4=O)C(C)Cl         |
| ZINC08442167 | 7.86  | -0.68             | -18.6            | 1        | 6           | 0      | 615.985         | 5              | Cc1ccc(cc1C)NC(=O)COC2C(C)C@H3C4C(=NC5=CC(C)C(C4=O)C(C)Cl                    |
| ZINC00633944 | 4.79  | -0.29             | -11.16           | 1        | 6           | 0      | 471.38          | 6              | C(C@H)(c1ccccc1)NC(=O)CSc2nnc(n2C)c3cc4cc(cc4o3)Br                           |
| ZINC08442166 | 5.28  | 0.09              | -14.52           | 0        | 5           | 0      | 588.164         | 3              | CC(=O)Oc1c(cc1)C=Cc2/c(=O)n3c4cccc4nc3s2]I                                   |
| ZINC08442165 | 4.17  | 2.88              | -16.84           | 0        | 6           | 0      | 420.49          | 7              | CCOC1cc(cc1OC(=O)C)CC=C/C=C2/C(=O)n3c4cccc4nc3s2                             |
| ZINC08442164 | 6.1   | 2.53              | -15.58           | 0        | 5           | 0      | 495.579         | 5              | Cc1cc(c(n1c2ccc(cc2)OCc3cccc3F)C)/C=c4/c(=O)n5c6cccc6nc5s4                   |
| ZINC00633938 | 3.54  | 1.33              | -16.81           | 1        | 7           | 0      | 499.337         | 8              | Cn1c(nnc1S(=O)N)C2c(cc2Br)F)COC3cccc3OC                                      |
| ZINC00633936 | 3.98  | -0.92             | -16.25           | 0        | 7           | 0      | 465.623         | 9              | Cn1c(nnc1S(=O)N)C2CCN(C2)c3cccc3)CCC4ccc(cc4)OC                              |
| ZINC08442163 | 3.97  | 10                | -10.73           | 1        | 5           | 0      | 465.097         | 5              | c1ccc(cc1C(=O)COC(=O)c2cc(=O)nH)c3c2cc(cc3)Br                                |
| ZINC0977563  | 3.71  | 8.97              | -26.36           | 3        | 6           | 0      | 452.337         | 5              | c1ccc2c(c1)nHc(n2)c3ccc(cc3)NC(=S)NC(=O)c4cc(cnc4)Br                         |
| ZINC08442162 | 3.99  | 1.81              | -23.44           | 1        | 8           | 0      | 454.552         | 11             | Cn1c(nnc1S(=O)N)C2cccc(c2)C(=O)OC)CCC3ccc(cc3)OC                             |
| ZINC08442161 | 5.97  | 1.17              | -14.8            | 0        | 4           | 0      | 421.525         | 3              | Cc1ccc(cc1)Cn2cc(c3c2ccc3)/C=c4/c(=O)n5c6cccc6nc5s4                          |
| ZINC00633932 | 4.51  | 0.67              | -17.07           | 1        | 7           | 0      | 460.987         | 10             | Cn1c(nnc1S(=O)N)C2cc(ccc2OC)C)CC3ccc(cc3)OC                                  |
| ZINC08442160 | 6.49  | 14.52             | -18.63           | 0        | 6           | 0      | 444.512         | 7              | CCCCOC(=O)c1ccc(cc1)c2ccc(a2)/C=c3/c(=O)n4c5cccc5nc4s3                       |
| ZINC08442159 | 5.69  | 13.19             | -12.94           | 0        | 5           | 0      | 493.382         | 5              | COC1cc(c(cc1OCc2cccc2)Br)/C=c3/c(=O)n4c5cccc5nc4s3                           |
| ZINC08442157 | 6.54  | -0.25             | -12.7            | 0        | 4           | 0      | 477.383         | 4              | Cc1ccc(cc1)COC2ccc(cc2)/C=c3/c(=O)n4c5cccc5nc4s3)Br                          |
| ZINC08442156 | 2.53  | 10.05             | -21.48           | 1        | 9           | 0      | 495.605         | 8              | Cc1ccc(cc1C)OCc2nnc(n2C)S(=O)Nc3ccc(cc3)C(=O)N4COCOC4                        |
| ZINC00633925 | 4.73  | 1.64              | -13.88           | 1        | 6           | 0      | 497.365         | 7              | Cc1ccc(cc1C)OCc2nnc(n2C)S(=O)Nc3ccc(cc3)Br)F                                 |
| ZINC08442153 | 5.36  | 9.84              | -19.63           | 0        | 12          | 0      | 573.635         | 6              | COC1cc(ccc1OCnnc(n2)N3COCOC3)N4COCOC4)/C=c5/c(=O)n6c7cccc7nc6s5              |
| ZINC08442152 | 2.82  | -3.01             | -19.85           | 1        | 8           | 0      | 478.622         | 8              | Cc1ccc(c1C(=O)N)CCc2nnc(n2C)S(=O)N3CCN(C3)c4cccc4                            |
| ZINC08442149 | 3.41  | 11.57             | -22.21           | 2        | 8           | 0      | 492.63          | 9              | Cc1ccc(c1C(=O)N)CCc2nnc(n2C)S(=O)N3cc(ccs3)c4cccc4                           |
| ZINC00633923 | 3.35  | -1.44             | -20.64           | 2        | 8           | 0      | 473.986         | 9              | Cc1ccc(c1C(=O)N)CCc2nnc(n2C)S(=O)N3ccc(cc3)C(=O)O                            |
| ZINC00633922 | 2.85  | -2.95             | -21.18           | 1        | 8           | 0      | 478.622         | 8              | Cc1ccc(c1C)C(=O)NCCc2nnc(n2C)S(=O)N3CCN(C3)c4cccc4                           |
| ZINC08442142 | 2.6   | 10.03             | -74.48           | 2        | 9           | -1     | 452.516         | 9              | Cc1ccc(c1C)C(=O)NCCc2nnc(n2C)S(=O)N3ccc(cc3)C(=O)O                           |
| ZINC00633920 | 3.05  | -3.39             | -22.6            | 1        | 8           | 0      | 499.04          | 8              | Cn1c(nnc1S(=O)N)C2CCN(C2)c3cccc3)CCN(=O)c4cccc4C                             |
| ZINC08442138 | 2.87  | -2.97             | -20.77           | 1        | 8           | 0      | 478.622         | 8              | Cc1ccc(cc1)C(=O)NCCc2nnc(n2C)S(=O)N3CCN(C3)c4cccc4                           |
| ZINC08442137 | 7.38  | 2.04              | -7.83            | 0        | 3           | 0      | 492.233         | 7              | c1ccc(cc1C)c2ccc(cc2)C)O(C@H)(Cn3cnc3)c4ccc(cc4)C)Cl                         |
| ZINC08442137 | 7.38  | 2.32              | -38.45           | 1        | 3           | 1      | 493.241         | 7              | c1ccc(cc1C)c2ccc(cc2)C)O(C@H)(Cn3cnc3)c4ccc(cc4)C)Cl                         |
| ZINC08442136 | 7.38  | 1.96              | -7.8             | 0        | 3           | 0      | 492.233         | 7              | c1ccc(cc1C)c2ccc(cc2)C)O(C@H)(Cn3cnc3)c4ccc(cc4)C)Cl                         |
| ZINC08442136 | 7.38  | 2.24              | -38.45           | 1        | 3           | 1      | 493.241         | 7              | c1ccc(cc1C)c2ccc(cc2)C)O(C@H)(Cn3cnc3)c4ccc(cc4)C)Cl                         |
| ZINC08442135 | 3.46  | 11.58             | -23.21           | 2        | 8           | 0      | 492.63          | 9              | Cc1ccc(cc1C)C(=O)NCCc2nnc(n2C)S(=O)N3ccc(cc3)c4cccc4                         |
| ZINC08442133 | 2.62  | 10.04             | -74.22           | 2        | 9           | -1     | 452.516         | 9              | Cc1ccc(cc1C)C(=O)NCCc2nnc(n2C)S(=O)N3ccc(cc3)C(=O)O                          |
| ZINC00633914 | 3.63  | -1.14             | -15.19           | 1        | 6           | 0      | 461.385         | 8              | Cn1c(nnc1S(=O)N)C2cc(ccc2)Br)CNC(=O)C3ccc(cc3)OC                             |
| ZINC00633912 | 4.1   | -0.72             | -14.98           | 1        | 6           | 0      | 451.379         | 8              | Cn1c(nnc1S(=O)N)C2cc(ccc2)C)CNC(=O)C3ccc(cc3)OC                              |
| ZINC02851694 | 4     | -1.02             | -14.49           | 1        | 6           | 0      | 475.412         | 9              | Cn1c(nnc1S(=O)N)C2cc(ccc2)Br)CNC(=O)C3ccc(cc3)OC                             |
| ZINC00633907 | 3.25  | -2.81             | -20.19           | 1        | 8           | 0      | 492.649         | 9              | Cn1c(nnc1S(=O)N)C2CCN(C2)c3cccc3)CCN(=O)c4ccc(cc4)C                          |
| ZINC00633905 | 3.1   | -3.42             | -20.45           | 1        | 8           | 0      | 499.04          | 8              | Cn1c(nnc1S(=O)N)C2CCN(C2)c3cccc3)CCN(=O)c4ccc(cc4)C                          |
| ZINC00633902 | 4.17  | -3.52             | -12.04           | 0        | 7           | 0      | 466.607         | 8              | Cc1ccc(cc1)OCc2nnc(cc2)S(=O)N3CCN(C3)c4cccc4)C)C)C                           |
| ZINC08442128 | 3.83  | 1.17              | -15.71           | 0        | 7           | 0      | 428.492         | 5              | Cn1c2c(c(=O)n(c1=O)C)n(c2)CCOC3c4cccc4Cc5c3cccc5                             |
| ZINC08442128 | 3.83  | 1.45              | -52.18           | 1        | 7           | 1      | 429.5           | 5              | Cn1c2c(c(=O)n(c1=O)C)n(c2)CCOC3c4cccc4Cc5c3cccc5                             |
| ZINC08442127 | 3.62  | 0.96              | -14.07           | 0        | 7           | 0      | 430.508         | 5              | Cn1c2c(c(=O)n(c1=O)C)n(c2)CCOC3c4cccc4Cc5c3cccc5                             |
| ZINC08442127 | 3.62  | 1.24              | -50.25           | 1        | 7           | 1      | 431.516         | 5              | Cn1c2c(c(=O)n(c1=O)C)n(c2)CCOC3c4cccc4Cc5c3cccc5                             |
| ZINC00633900 | 3.05  | -2.64             | -12.85           | 2        | 7           | 0      | 498.403         | 8              | Cn1c(nnc1S(=O)N)C2ccc(cc2)Br)CNC(=O)c3cccc3                                  |
| ZINC08442126 | 2.71  | -4.12             | -17.69           | 2        | 8           | 0      | 458.594         | 8              | Cn1c(nnc1S(=O)N)C2nnc3cccc3s2)CNC(=O)c4cccc4                                 |
| ZINC00633899 | 2.68  | -2.8              | -13.33           | 2        | 7           | 0      | 484.376         | 7              | Cn1c(nnc1S(=O)N)C2ccc(cc2)Br)CNC(=O)c3cccc3                                  |
| ZINC08442122 | 3.65  | 5.03              | -11.99           | 4        | 7           | 0      | 449.923         | 3              | Cc1ccc(cc1)S(=O)C2c3c(c(nH)n2)OC(=C(C@)34c5cc(ccc5NC4=O)C)C#N)N              |
| ZINC08442121 | 3.65  | 4.75              | -13.09           | 4        | 7           | 0      | 449.923         | 3              | Cc1ccc(cc1)S(=O)C2c3c(c(nH)n2)OC(=C(C@)34c5cc(ccc5NC4=O)C)C#N)N              |
| ZINC08442120 | 3.89  | 8.12              | -12.83           | 3        | 7           | 0      | 455.543         | 5              | Cc1ccc(cc1)S(=O)C2c3c(c(nH)n2)OC(=C(C@)34c5cc(ccc5NC4=O)C)C#N)N              |
| ZINC08442119 | 3.89  | 7.95              | -12.93           | 3        | 7           | 0      | 455.543         | 5              | Cc1ccc(cc1)S(=O)C2c3c(c(nH)n2)OC(=C(C@)34c5cc(ccc5NC4=O)C)C#N)N              |
| ZINC08442118 | 3.14  | 4.59              | -12.4            | 4        | 7           | 0      | 433.468         | 3              | Cc1ccc(cc1)S(=O)C2c3c(c(nH)n2)OC(=C(C@)34c5cc(ccc5NC4=O)F)C#N)N              |
| ZINC08442117 | 3.14  | 4.32              | -13.57           | 4        | 7           | 0      | 433.468         | 3              | Cc1ccc(cc1)S(=O)C2c3c(c(nH)n2)OC(=C(C@)34c5cc(ccc5NC4=O)F)C#N)N              |
| ZINC08442116 | 2.89  | -3.75             | -17.15           | 2        | 8           | 0      | 458.594         | 7              | C(C@H)(c1nnc(n1)S(=O)N)C2nnc3cccc3s2)NC(=O)c4cccc4                           |
| ZINC08442115 | 3.62  | 7.35              | -13.2            | 3        | 7           | 0      | 443.532         | 4              | CCN1c2cccc2)C@3(C1=O)c4c(nH)c40C(=C3C#N)N)CS5ccc(cc5)C                       |
| ZINC08442114 | 2.89  | 8.47              | -17.14           | 2        | 8           | 0      | 458.594         | 7              | C(C@H)(c1nnc(n1)S(=O)N)C2nnc3cccc3s2)NC(=O)c4cccc4                           |
| ZINC08442112 | 3.62  | 7.57              | -13.31           | 3        | 7           | 0      | 443.532         | 4              | CCN1c2cccc2)C@3(C1=O)c4c(nH)c40C(=C3C#N)N)CS5ccc(cc5)C                       |
| ZINC08442111 | 2.98  | -1.85             | -14.44           | 2        | 8           | 0      | 486.648         | 7              | C(C@H)(c1nnc(n1)S(=O)N)C2c3c(c3)C(CCC3)C#N)NC(=O)c4cccc4                     |
| ZINC01102227 | 4.45  | -1.69             | -15.72           | 3        | 7           | 0      | 496.523         | 3              | COC1ccc(cc1)c2ccc3c4c(c5c(c(=O)nH)4)C(C@H)(C(=O)N)C#N)c6ccc(cc6)F)sc3n2      |
| ZINC08442110 | 4.26  | 12.54             | -9.52            | 2        | 6           | 0      | 459.553         | 3              | C(C@H)1CC=C2[C@H](C1)C(C@)3(c4cccc4N(C3=O)CCc5cccc5)C(C(=C2#N)N)(C#N)C#N     |
| ZINC08442109 | 4.26  | 12.51             | -10.14           | 2        | 6           | 0      | 459.553         | 3              | C(C@H)1CC=C2[C@H](C1)C(C@)3(c4cccc4N(C3=O)CCc5cccc5)C(C(=C2#N)N)(C#N)C#N     |
| ZINC08442108 | 4.26  | 12.46             | -10.64           | 2        | 6           | 0      | 459.553         | 3              | C(C@H)1CC=C2[C@H](C1)C(C@)3(c4cccc4N(C3=O)CCc5cccc5)C(C(=C2#N)N)(C#N)C#N     |
| ZINC08442108 | 4.34  | 2.7               | -40.61           | 2        | 6           | 1      | 460.561         | 3              | C(C@H)1CC=C2[C@H](C1)C(C@)3(c4cccc4N(C3=O)CCc5cccc5)C(C(=NH2+)C2C#N)(C#N)C#N |



Supplementary Table S2:

Detailed table of XP Docking using Schrodinger's Glide module

| ZINC_ID      | sLogP | ApolarDesolvation | PolarDesolvation | H Donors | H Acceptors | Charge | MolecularWeight | RotatableBonds | SMILES                                                                             |
|--------------|-------|-------------------|------------------|----------|-------------|--------|-----------------|----------------|------------------------------------------------------------------------------------|
| ZINC08442107 | 2.98  | -1.87             | -14.58           | 2        | 8           | 0      | 486.648         | 7              | C[C@@H](c1nnc(n1C)SCC(=O)Nc2c(c3c(s2)CCCC3)C#N)NC(=O)c4ccc4                        |
| ZINC08442106 | 4.26  | 11.57             | -10.66           | 2        | 6           | 0      | 459.553         | 3              | C[C@@H]1CC=C2[C@@H]([C1])C@@[3](c4cccc4N(C3=O)CCc5cccc5)C(C(=C2C#N)N)(C#N)C#N      |
| ZINC08442106 | 4.34  | 2.33              | -41.22           | 2        | 6           | 1      | 460.561         | 3              | C[C@@H]1CC=C2[C@@H]([C1])C@@[3](c4cccc4N(C3=O)CCc5cccc5)C(C(=[NH2+])C2C#N)(C#N)C#N |
| ZINC08442105 | 3.06  | -1.77             | -14.71           | 2        | 8           | 0      | 498.659         | 9              | C=Cc1c[nnc1SCC(=O)Nc2c(c3c(s2)CCCC3)C#N]CNC(=O)c4ccc4                              |
| ZINC08442104 | 4.64  | 0.43              | -11.71           | 1        | 6           | 0      | 491.997         | 8              | CCOC(=O)C1[C@@H](C(=C(N=C1)SCC(=O)Nc2ccc(cc2F)C)C#N)c3ccc3                         |
| ZINC08442104 | 5.21  | -1.23             | -10.26           | 1        | 6           | 0      | 491.997         | 8              | CCOC(=O)C1[C@@H](C(=C(N=C1)SCC(=O)Nc2ccc(cc2F)C)C#N)c3ccc3                         |
| ZINC08442104 | 5.03  | -0.39             | -9.9             | 1        | 6           | 0      | 491.997         | 8              | CCOC(=O)C1=C(N=C(C(=C(N=C1)SCC(=O)Nc3ccc(cc3F)C)C)C)C                              |
| ZINC08442103 | 3.54  | -3.15             | -16.37           | 2        | 8           | 0      | 484.632         | 9              | C[C@@H](c1nnc(n1C=C)SCC(=O)Nc2c3ccc3s2)NC(=O)c4ccc4                                |
| ZINC08442102 | 4.64  | 0.43              | -11.87           | 1        | 6           | 0      | 491.997         | 8              | CCOC(=O)C1[C@@H](C(=C(N=C1)SCC(=O)Nc2ccc(cc2F)C)C#N)c3ccc3                         |
| ZINC08442102 | 5.21  | -1.42             | -11.89           | 1        | 6           | 0      | 491.997         | 8              | CCOC(=O)C1[C@@H](C(=C(N=C1)SCC(=O)Nc2ccc(cc2F)C)C#N)c3ccc3                         |
| ZINC08442102 | 5.03  | -0.44             | -10.41           | 1        | 6           | 0      | 491.997         | 8              | CCOC(=O)C1=C(N=C(C(=C(N=C1)SCC(=O)Nc3ccc(cc3F)C)C)C)C                              |
| ZINC08442101 | 3.54  | -3.15             | -16.42           | 2        | 8           | 0      | 484.632         | 9              | C[C@@H](c1nnc(n1CC=C)SCC(=O)Nc2c3ccc3s2)NC(=O)c4ccc4                               |
| ZINC08442100 | 4.82  | 2.34              | -12.41           | 1        | 5           | 0      | 414.412         | 5              | Cc1ccc2c(c1)nc([nH]2)CS3c3c(c(cc(n3)c4ccc4)C(F)(F)F)C#N                            |
| ZINC08442099 | 4.89  | 10.47             | -16.2            | 1        | 6           | 0      | 470.476         | 7              | Cc1ccc(cc1OC)c2cc(c(c(n2)SCc3[nH]c4ccc4n3)C#N)C(F)(F)F                             |
| ZINC08442098 | 3.27  | -3.61             | -16.75           | 2        | 8           | 0      | 472.621         | 8              | Cc1c[nnc1SCC(=O)Nc2c3ccc3s2][C@@H](C)NC(=O)c4ccc4                                  |
| ZINC08442097 | 3.94  | 7.17              | -12.02           | 3        | 7           | 0      | 428.492         | 5              | Cc1ccc(ccc1OC2CCCC2)[C@@H]3c4c([nH]e4OC(=C3C#N)N)c5cccc5                           |
| ZINC08442096 | 3.94  | 7.24              | -11.78           | 3        | 7           | 0      | 428.492         | 5              | Cc1ccc(ccc1OC2CCCC2)[C@@H]3c4c([nH]e4OC(=C3C#N)N)c5cccc5                           |
| ZINC08442095 | 3.27  | -3.59             | -16.69           | 2        | 8           | 0      | 472.621         | 8              | Cc1c[nnc1SCC(=O)Nc2c3ccc3s2][C@@H](C)NC(=O)c4ccc4                                  |
| ZINC0664784  | 4.81  | 6.27              | -10.96           | 3        | 7           | 0      | 444.878         | 4              | Cc1ccc(cc1)c2c3c([nH]2)OC(=C([C@@H]3c4ccc(o4)c5ccc(cc5)C)C#N)N                     |
| ZINC0664787  | 4.81  | 6.25              | -11.12           | 3        | 7           | 0      | 444.878         | 4              | Cc1ccc(cc1)c2c3c([nH]2)OC(=C([C@@H]3c4ccc(o4)c5ccc(cc5)C)C#N)N                     |
| ZINC0664784  | 4.66  | 6.34              | -10.02           | 3        | 6           | 0      | 465.332         | 3              | c1cc(sc1)c2c3c([nH]2)OC(=C([C@@H]3c4ccc(o4)c5ccc(cc5)Br)C#N)N                      |
| ZINC08442094 | 3.64  | -3.11             | -16.5            | 2        | 8           | 0      | 486.648         | 8              | CC(C)[C@@H](c1nnc(n1C)SCC(=O)Nc2c3ccc3s2)NC(=O)c4ccc4                              |
| ZINC08670819 | 3.26  | 4.25              | -12.69           | 3        | 7           | 0      | 417.856         | 2              | Cc1c2ccc2[C@@3](C1=O)c4c([nH]nc4OC(=C3C#N)N)c5ccc(cc5)Cl                           |
| ZINC08670819 | 3.26  | 4.97              | -13.38           | 3        | 7           | 0      | 417.856         | 2              | Cc1c2ccc2[C@@3](C1=O)c4c([nH]nc4OC(=C3C#N)N)c5ccc(cc5)Cl                           |
| ZINC08670818 | 3.26  | 4.82              | -13.07           | 3        | 7           | 0      | 417.856         | 2              | Cc1c2ccc2[C@@3](C1=O)c4c([nH]nc4OC(=C3C#N)N)c5ccc(cc5)Cl                           |
| ZINC08670818 | 3.26  | 5.6               | -13.71           | 3        | 7           | 0      | 417.856         | 2              | Cc1c2ccc2[C@@3](C1=O)c4c([nH]nc4OC(=C3C#N)N)c5ccc(cc5)Cl                           |
| ZINC08442092 | 3.64  | -3.61             | -16.31           | 2        | 8           | 0      | 486.648         | 8              | CC(C)[C@@H](c1nnc(n1C)SCC(=O)Nc2c3ccc3s2)NC(=O)c4ccc4                              |
| ZINC0664754  | 4.96  | 8.87              | -12.33           | 3        | 7           | 0      | 478.552         | 6              | Cc1ccc(cc1C)c2c3c([nH]2)OC(=C([C@@H]3c4ccc(cc4)OC)OCc5cccc5)C#N)N                  |
| ZINC0664757  | 4.96  | 8.88              | -12.27           | 3        | 7           | 0      | 478.552         | 6              | Cc1ccc(cc1C)c2c3c([nH]2)OC(=C([C@@H]3c4ccc(cc4)OC)OCc5cccc5)C#N)N                  |
| ZINC08442091 | 3.09  | 10                | -14.57           | 2        | 7           | 0      | 455.609         | 11             | C[C@@H](c1nnc(n1C=C)SCC(=O)Nc2ccc2)NC(=O)c3ccc3                                    |
| ZINC0664736  | 3.55  | 4.86              | -10.58           | 3        | 8           | 0      | 432.48          | 5              | Cc1ccc(cc1C)c2c3c([nH]2)OC(=C([C@@H]3c4ccc(cc4)OC)OC)C#N)N                         |
| ZINC0664738  | 3.55  | 4.53              | -10.99           | 3        | 8           | 0      | 432.48          | 5              | Cc1ccc(cc1C)c2c3c([nH]2)OC(=C([C@@H]3c4ccc(cc4)OC)OC)C#N)N                         |
| ZINC08442090 | 3.09  | 9.99              | -14.43           | 2        | 7           | 0      | 455.609         | 11             | C[C@@H](c1nnc(n1CC=C)SCC(=O)Nc2ccc2)NC(=O)c3ccc3                                   |
| ZINC08442089 | 4.25  | 6.6               | -11.11           | 3        | 7           | 0      | 430.508         | 6              | CCCOC1ccc(cc1OC)C[C@@H]2c3c([nH]nc3OC(=C2C#N)N)c4ccc(cc4)C                         |
| ZINC08442088 | 4.25  | 6.62              | -10.99           | 3        | 7           | 0      | 430.508         | 6              | CCCOC1ccc(cc1OC)C[C@@H]2c3c([nH]nc3OC(=C2C#N)N)c4ccc(cc4)C                         |
| ZINC08442087 | 3.29  | 10.61             | -22.1            | 2        | 8           | 0      | 498.659         | 10             | Cc1c[nnc1SCC(=O)Nc2nc(c3c2)c3ccc3]CCNC(=O)c4ccc4                                   |
| ZINC0664726  | 6     | 9.35              | -9.55            | 3        | 6           | 0      | 482.971         | 5              | Cc1ccc(cc1C)c2c3c([nH]2)OC(=C([C@@H]3c4ccc4OC5ccc(cc5)C)C#N)N                      |
| ZINC0664729  | 6     | 9.31              | -9.85            | 3        | 6           | 0      | 482.971         | 5              | Cc1ccc(cc1C)c2c3c([nH]2)OC(=C([C@@H]3c4ccc4OC5ccc(cc5)C)C#N)N                      |
| ZINC0633895  | 3.19  | -2.52             | -18.3            | 2        | 7           | 0      | 449.989         | 9              | Cc1c[nnc1SCC(=O)Nc2ccc2]CCNC(=O)c3ccc3                                             |
| ZINC0664717  | 4.53  | 6.32              | -7.67            | 3        | 5           | 0      | 421.298         | 2              | Cc1ccc(cc1C)c2c3c([nH]2)OC(=C([C@@H]3c4ccc(cc4)Br)C#N)N                            |
| ZINC0664719  | 4.53  | 6.34              | -7.59            | 3        | 5           | 0      | 421.298         | 2              | Cc1ccc(cc1C)c2c3c([nH]2)OC(=C([C@@H]3c4ccc(cc4)Br)C#N)N                            |
| ZINC0633893  | 3.84  | -2.82             | -20.68           | 2        | 7           | 0      | 484.434         | 9              | Cc1c[nnc1SCC(=O)Nc2ccc(cc2)C]CCNC(=O)c3ccc3                                        |
| ZINC0664707  | 4.62  | 6.35              | -8.3             | 3        | 5           | 0      | 439.288         | 2              | Cc1ccc(cc1C)c2c3c([nH]2)OC(=C([C@@H]3c4ccc(cc4)Br)C#N)N                            |
| ZINC0664709  | 4.62  | 6.37              | -8.17            | 3        | 5           | 0      | 439.288         | 2              | Cc1ccc(cc1C)c2c3c([nH]2)OC(=C([C@@H]3c4ccc(cc4)Br)C#N)N                            |
| ZINC0633892  | 3.84  | -2.67             | -17.13           | 2        | 7           | 0      | 484.434         | 9              | Cc1c[nnc1SCC(=O)Nc2ccc(cc2)C]CCNC(=O)c3ccc3                                        |
| ZINC08442086 | 5.18  | 6.45              | -6.3             | 3        | 5           | 0      | 451.368         | 2              | c1cc(ccc1[C@@H]2c3c([nH]nc3OC(=C2C#N)N)C45CC6CC(C4)CC(C6)C5)Br                     |
| ZINC08442085 | 5.18  | 6.43              | -6.28            | 3        | 5           | 0      | 451.368         | 2              | c1cc(ccc1[C@@H]2c3c([nH]nc3OC(=C2C#N)N)C45CC6CC(C4)CC(C6)C5)Br                     |
| ZINC08442084 | 4.41  | 4.43              | -9.16            | 3        | 7           | 0      | 432.524         | 4              | Cc1ccc(cc1OC)C[C@@H]2c3c([nH]nc3OC(=C2C#N)N)C45CC6CC(C4)CC(C6)C5                   |
| ZINC0633890  | 3.21  | -2.7              | -20.68           | 2        | 7           | 0      | 449.989         | 9              | Cc1c[nnc1SCC(=O)Nc2ccc(cc2)C]CCNC(=O)c3ccc3                                        |
| ZINC08442083 | 4.41  | 4.41              | -9.23            | 3        | 7           | 0      | 432.524         | 4              | Cc1ccc(cc1OC)C[C@@H]2c3c([nH]nc3OC(=C2C#N)N)C45CC6CC(C4)CC(C6)C5                   |
| ZINC08442082 | 4.2   | 4.78              | -8.97            | 3        | 8           | 0      | 462.55          | 5              | Cc1ccc(cc1OC)C[C@@H]2c3c([nH]nc3OC(=C2C#N)N)C45CC6CC(C4)CC(C6)C5                   |
| ZINC08442081 | 4.2   | 4.95              | -10.21           | 3        | 8           | 0      | 462.55          | 5              | Cc1ccc(cc1OC)C[C@@H]2c3c([nH]nc3OC(=C2C#N)N)C45CC6CC(C4)CC(C6)C5                   |
| ZINC05921075 | 0.48  | 3.77              | -58.32           | 4        | 10          | 1      | 440.48          | 7              | CCOC1ccc(cc1OCC)NH+2CCOCC2[C@@H]3c4c([nH]nc4=O)OC(=C3C#N)N                         |
| ZINC05921073 | 0.48  | 3.77              | -58.16           | 4        | 10          | 1      | 440.48          | 7              | CCOC1ccc(cc1OCC)NH+2CCOCC2[C@@H]3c4c([nH]nc4=O)OC(=C3C#N)N                         |
| ZINC0633888  | 3.61  | -2.15             | -19.01           | 2        | 7           | 0      | 464.016         | 9              | Cc1c[nnc1SCC(=O)Nc2ccc(cc2)C]CCNC(=O)c3ccc3                                        |
| ZINC0664653  | 5.69  | 6.99              | -11.69           | 3        | 7           | 0      | 499.398         | 6              | CC(C)(C)c1c2c([nH]1)OC(=C([C@@H]2c3ccc(cc3)OC)OCc4ccc(cc4)C)C#N)N                  |
| ZINC0633887  | 3.24  | 9.02              | -20.1            | 2        | 7           | 0      | 449.989         | 9              | Cc1c[nnc1SCC(=O)Nc2ccc(cc2)C]CCNC(=O)c3ccc3                                        |
| ZINC0664656  | 5.69  | 6.99              | -11.37           | 3        | 7           | 0      | 499.398         | 6              | CC(C)(C)c1c2c([nH]1)OC(=C([C@@H]2c3ccc(cc3)OC)OCc4ccc(cc4)C)C#N)N                  |
| ZINC0664643  | 4.73  | 6.01              | -13.91           | 3        | 7           | 0      | 493.954         | 3              | Cc1ccc(cc1)c2c3c([nH]2)OC(=C([C@@H]3c4ccc(cc4)Br)C#N)N                             |
| ZINC08442078 | 3.13  | 10.46             | -22.71           | 2        | 8           | 0      | 498.659         | 9              | Cc1c[nnc1]NC(=O)CSc2nnc2C]CCNC(=O)c3ccc3c4ccc4                                     |
| ZINC0664621  | 3.96  | 5.22              | -9.69            | 3        | 5           | 0      | 429.224         | 2              | Cc1ccc(cc1c2c3c([nH]2)OC(=C([C@@H]3c4ccc(cc4)Br)C#N)N)F                            |



**Supplementary Table S2:  
Detailed table of XP Docking using Schrodinger's Glide module**

| ZINC_ID      | sLogP | ApolarDesolvation | PolarDesolvation | H Donors | H Acceptors | Charge | MolecularWeight | RotatableBonds | SMILES                                                                                    |
|--------------|-------|-------------------|------------------|----------|-------------|--------|-----------------|----------------|-------------------------------------------------------------------------------------------|
| ZINC08442062 | 3.73  | 0.15              | -16.93           | 0        | 7           | 0      | 454.529         | 7              | CC1=NC(C([C@@H](C1C(=O)OC)c2cccs2)C#N)SCC(=O)c3ccc4c(c3)OC04                              |
| ZINC08442062 | 4.11  | -0.4              | -14.45           | 0        | 7           | 0      | 454.529         | 7              | CC1=C([C@@H](C1C(=O)OC)c2cccs2)C#N)SCC(=O)c3ccc4c(c3)OC04                                 |
| ZINC08442062 | 4.29  | 1.56              | -27.26           | 0        | 7           | 0      | 454.529         | 7              | COC(=O)C1[C@@H](C1C(=O)OC)c2cccs2)C#N)SCC(=O)c3ccc4c(c3)OC04                              |
| ZINC08442062 | 4.29  | -0.23             | -15.85           | 0        | 7           | 0      | 454.529         | 7              | COC(=O)C1[C@@H](C1C(=O)OC)c2cccs2)C#N)SCC(=O)c3ccc4c(c3)OC04                              |
| ZINC0633836  | 5.36  | 1.94              | -11.82           | 1        | 5           | 0      | 479.35          | 7              | Cc1cccc(c1)c2nnc(n2CC=C)SCC(=O)Nc3c(ccc3Br)F                                              |
| ZINC09281351 | 3.88  | 6.43              | -12.5            | 3        | 7           | 0      | 445.91          | 3              | CC(C)c1c2c(nh1)OC(=C([C@@@]23c4cccc4N(C3=O)Cc5ccc(cc5)C)C#N)N                             |
| ZINC09281351 | 3.88  | 7.12              | -12.66           | 3        | 7           | 0      | 445.91          | 3              | CC(C)c1c2c(nh1)OC(=C([C@@@]23c4cccc4N(C3=O)Cc5ccc(cc5)C)C#N)N                             |
| ZINC0633833  | 5.09  | 1.48              | -12.67           | 1        | 5           | 0      | 467.339         | 6              | Cn1c(nnc1SCC(=O)Nc2c(ccc2Br)F)F)c3cccc(c3)C                                               |
| ZINC08442061 | 2.8   | 4.36              | -14.27           | 3        | 8           | 0      | 447.882         | 4              | COCc1c2c(nh1)OC(=C([C@@@]23c4cccc4N(C3=O)Cc5ccc(cc5)C)C#N)N                               |
| ZINC0633832  | 4.71  | 1.22              | -12.97           | 1        | 5           | 0      | 453.312         | 5              | Cc1cccc(c1)c2nnc(n2C)SCC(=O)Nc3c(ccc3Br)F                                                 |
| ZINC08442060 | 2.8   | 3.94              | -12.16           | 3        | 8           | 0      | 447.882         | 4              | COCc1c2c(nh1)OC(=C([C@@@]23c4cccc4N(C3=O)Cc5ccc(cc5)C)C#N)N                               |
| ZINC0633829  | 5.07  | 1.44              | -12.03           | 1        | 5           | 0      | 467.339         | 6              | Cn1c(nnc1SCC(=O)Nc2c(ccc2Br)F)F)c3cccc(c3)C                                               |
| ZINC08442059 | 3.67  | -0.12             | -17              | 2        | 7           | 0      | 473.961         | 9              | Cc1c(ccc1C)NC(=O)CSc2nnc(n2CC=C)CNC(=O)c3cccc3F                                           |
| ZINC08442058 | 5.4   | 13.91             | -28.91           | 2        | 5           | 0      | 465.578         | 7              | CC1=C([C@@H](C1C(=O)OC)c2cccs2)C#N)SCC(=O)c3ccc4c(c3)OC04                                 |
| ZINC08442058 | 5.74  | -0.66             | -13.03           | 1        | 5           | 0      | 465.578         | 7              | CC1=C([C@@H](C1C(=O)OC)c2cccs2)C#N)SCC(=O)c3ccc4c(c3)OC04                                 |
| ZINC08442058 | 5.92  | 1.11              | -22.2            | 1        | 5           | 0      | 465.578         | 7              | C=C1C([C@@H](C1C(=O)OC)c2cccs2)C#N)SCC(=O)c3ccc4c(c3)OC04                                 |
| ZINC08442058 | 5.92  | -0.65             | -13.73           | 1        | 5           | 0      | 465.578         | 7              | C=C1C([C@@H](C1C(=O)OC)c2cccs2)C#N)SCC(=O)c3ccc4c(c3)OC04                                 |
| ZINC08442057 | 3.69  | -0.16             | -18.84           | 2        | 7           | 0      | 473.961         | 9              | Cc1ccc(cc1)NC(=O)CSc2nnc(n2CC=C)CNC(=O)c3cccc3F                                           |
| ZINC04391381 | 5.4   | 13.87             | -20.72           | 2        | 5           | 0      | 465.578         | 7              | CC1=C([C@@H](C1C(=O)OC)c2cccs2)C#N)SCC(=O)c3ccc4c(c3)OC04                                 |
| ZINC04391381 | 5.92  | 12.3              | -14.09           | 1        | 5           | 0      | 465.578         | 7              | C=C1C([C@@H](C1C(=O)OC)c2cccs2)C#N)SCC(=O)c3ccc4c(c3)OC04                                 |
| ZINC04391381 | 5.92  | 13.43             | -24.76           | 1        | 5           | 0      | 465.578         | 7              | C=C1C([C@@H](C1C(=O)OC)c2cccs2)C#N)SCC(=O)c3ccc4c(c3)OC04                                 |
| ZINC13161526 | 4.61  | 11.51             | -19.06           | 1        | 6           | 0      | 465.944         | 2              | [H]N=C1V1[C@@H](C2=CCCC[C@@H]2)C@3[C1(C#N)C#N]4cccc4N(C3=O)Cc5ccc(cc5)C)C#N               |
| ZINC0633816  | 3.29  | -0.72             | -19.23           | 2        | 7           | 0      | 459.934         | 9              | C=Cn1c(nnc1SCC(=O)Nc2cccc(c2)C)CNC(=O)c3cccc3F                                            |
| ZINC13161525 | 4.61  | 11.72             | -12.01           | 1        | 6           | 0      | 465.944         | 2              | [H]N=C1V1[C@@H](C2=CCCC[C@@H]2)C@3[C1(C#N)C#N]4cccc4N(C3=O)Cc5ccc(cc5)C)C#N               |
| ZINC13161524 | 4.61  | 11.88             | -12.19           | 1        | 6           | 0      | 465.944         | 2              | [H]N=C1V1[C@@H](C2=CCCC[C@@H]2)C@3[C1(C#N)C#N]4cccc4N(C3=O)Cc5ccc(cc5)C)C#N               |
| ZINC0633814  | 4.29  | 1.23              | -19.24           | 1        | 8           | 0      | 462.531         | 9              | Cn1c(nnc1SCC(=O)Nc2cccc(c2)C)CNC(=O)c3cccc3F                                              |
| ZINC08442053 | 4.61  | 11.68             | -12.62           | 1        | 6           | 0      | 465.944         | 2              | [H]N=C1V1[C@@H](C2=CCCC[C@@H]2)C@3[C1(C#N)C#N]4cccc4N(C3=O)Cc5ccc(cc5)C)C#N               |
| ZINC08442053 | 4.61  | 2.06              | -40.32           | 2        | 6           | 1      | 466.952         | 2              | c1ccc2c(c1)[C@@@]3([C@@H]4CCCC=C4)[C@@H]([C@H]5[NH2+])C3(C#N)C#N)C#N(=O)N2c5ccc(cc5)C)C#N |
| ZINC0633812  | 3.79  | 0.96              | -17.39           | 1        | 8           | 0      | 446.916         | 9              | Cn1c(nnc1SCC(=O)Nc2cccc(c2)C)CNC(=O)c3cccc3F                                              |
| ZINC0633810  | 4.16  | 1.09              | -16.64           | 1        | 8           | 0      | 460.943         | 10             | Cn1c(nnc1SCC(=O)Nc2cccc(c2)C)CNC(=O)c3cccc3F                                              |
| ZINC0633806  | 4.26  | -1.47             | -16              | 0        | 7           | 0      | 473.602         | 7              | Cn1c(nnc1SCC(=O)Nc2cccc(c2)C)CNC(=O)c3cccc3F                                              |
| ZINC0633803  | 3.75  | -1.77             | -13.99           | 0        | 7           | 0      | 457.987         | 7              | Cn1c(nnc1SCC(=O)Nc2cccc(c2)C)CNC(=O)c3cccc3F                                              |
| ZINC04391378 | 3.9   | 1.02              | -14.83           | 0        | 6           | 0      | 440.546         | 8              | CC1=NC(C([C@@H](C1C(=O)OC)c2cccs2)C#N)SCC(=O)c3ccc4c(c3)OC04                              |
| ZINC04391378 | 4.46  | 2.43              | -24.82           | 0        | 6           | 0      | 440.546         | 8              | COC1ccc(cc1)C(=O)CSC2=NC(=C)C([C@@H](C2C#N)C#N)C3=CC(=O)OC                                |
| ZINC04391378 | 4.46  | 0.64              | -13.77           | 0        | 6           | 0      | 440.546         | 8              | COC1ccc(cc1)C(=O)CSC2=NC(=C)C([C@@H](C2C#N)C#N)C3=CC(=O)OC                                |
| ZINC0633801  | 4.13  | -1.61             | -13.51           | 0        | 7           | 0      | 472.014         | 8              | Cn1c(nnc1SCC(=O)Nc2cccc(c2)C)CNC(=O)c3cccc3F                                              |
| ZINC0633798  | 4.14  | 0.94              | -16.15           | 1        | 8           | 0      | 460.943         | 10             | CCOC(=O)c1ccc(c1)NC(=O)CSc2nnc(n2C)COC3ccc(c3)C                                           |
| ZINC08442050 | 3.9   | 1.04              | -14.8            | 0        | 6           | 0      | 440.546         | 8              | CC1=NC(C([C@@H](C1C(=O)OC)c2cccs2)C#N)SCC(=O)c3ccc4c(c3)OC04                              |
| ZINC08442050 | 4.46  | 0.64              | -13.45           | 0        | 6           | 0      | 440.546         | 8              | COC1ccc(cc1)C(=O)CSC2=NC(=C)C([C@@H](C2C#N)C#N)C3=CC(=O)OC                                |
| ZINC08442050 | 4.28  | 0.53              | -11.6            | 0        | 6           | 0      | 440.546         | 8              | CC1=C([C@@H](C1C(=O)OC)c2cccs2)C#N)SCC(=O)c3ccc4c(c3)OC04                                 |
| ZINC08442050 | 4.46  | 2.19              | -15.24           | 0        | 6           | 0      | 440.546         | 8              | COC1ccc(cc1)C(=O)CSC2=NC(=C)C([C@@H](C2C#N)C#N)C3=CC(=O)OC                                |
| ZINC08442049 | 1.78  | -3.08             | -43.22           | 4        | 11          | 1      | 498.56          | 11             | CCOC1ccc(cc1)OCC(NH+)[2CCOC22][C@@H]3c4c([nh]n4OC(=C3C#N)N)CC(=O)OCC                      |
| ZINC08442048 | 2.48  | -0.48             | -18.94           | 2        | 10          | 0      | 483.55          | 11             | Cn1c(nnc1SCC(=O)Nc2cccc(c2)C)CNC(=O)c3cccc3F                                              |
| ZINC08442047 | 1.78  | -3.08             | -47.2            | 4        | 11          | 1      | 498.56          | 11             | CCOC1ccc(cc1)OCC(NH+)[2CCOC22][C@@H]3c4c([nh]n4OC(=C3C#N)N)CC(=O)OCC                      |
| ZINC0803806  | 3.76  | 5.71              | -11.64           | 3        | 7           | 0      | 434.521         | 6              | Cc1ccc(cc1)SCc2c3c(nh1)2)OC(=C([C@@H]3c4ccc(cc4)OC)C#N)N                                  |
| ZINC0633792  | 2.1   | -0.67             | -19.52           | 2        | 10          | 0      | 469.523         | 10             | Cn1c(nnc1SCC(=O)Nc2cccc(c2)C)CNC(=O)c3cccc3F                                              |
| ZINC0803800  | 3.83  | 5.17              | -12.28           | 3        | 7           | 0      | 418.478         | 4              | Cc1ccc(cc1)SCc2c3c(nh1)2)OC(=C([C@@H]3c4ccc(cc4)OC)C#N)N                                  |
| ZINC0662497  | 4.57  | 6.27              | -8.92            | 3        | 5           | 0      | 459.394         | 4              | Cc1ccc(cc1)SCc2c3c(nh1)2)OC(=C([C@@H]3c4ccc(cc4)OC)C#N)N                                  |
| ZINC0633782  | 3.87  | -1.38             | -20.14           | 1        | 8           | 0      | 441.509         | 10             | CC(C)OC(=O)c1ccc(c1)NC(=O)CSc2nnc(o2)Cc3ccc(c3)OC                                         |
| ZINC0662500  | 4.57  | 6.31              | -9.64            | 3        | 5           | 0      | 459.394         | 4              | Cc1ccc(cc1)SCc2c3c(nh1)2)OC(=C([C@@H]3c4ccc(cc4)OC)C#N)N                                  |
| ZINC08442046 | 4.01  | -1.56             | -19.73           | 1        | 8           | 0      | 441.509         | 11             | CCOC(=O)c1ccc(c1)NC(=O)CSc2nnc(o2)Cc3ccc(c3)OC                                            |
| ZINC0803814  | 4.17  | 6.76              | -12.62           | 3        | 6           | 0      | 425.517         | 4              | Cc1ccc(cc1)SCc2c3c(nh1)2)OC(=C([C@@H]3c4ccc(cc4)OC)C#N)N                                  |
| ZINC0803814  | 4.17  | 7.8               | -36.61           | 4        | 6           | 1      | 426.525         | 4              | Cc1ccc(cc1)SCc2c3c(nh1)2)OC(=C([C@@H]3c4ccc(cc4)OC)C#N)N                                  |
| ZINC08442045 | 2.79  | -3.78             | -41.54           | 4        | 9           | 1      | 488.568         | 8              | CCOC1ccc(cc1)OCC(NH+)[2CCOC22][C@@H]3c4c([nh]n4OC(=C3C#N)N)C5cccc5                        |
| ZINC08442044 | 4.27  | 6.39              | -68.66           | 1        | 8           | -1     | 481.337         | 10             | c1ccc(cc1)NC(=O)CSc2nnc(o2)CCOC3ccc(cc3)C)C(=O)O-                                         |
| ZINC08442043 | 3.07  | -2.93             | -40.56           | 4        | 9           | 1      | 468.578         | 8              | CCOC1ccc(cc1)OCC(NH+)[2CCOC22][C@@H]3c4c([nh]n4OC(=C3C#N)N)C(C)C                          |
| ZINC08442042 | 3.07  | -2.96             | -41.33           | 4        | 9           | 1      | 468.578         | 8              | CCOC1ccc(cc1)OCC(NH+)[2CCOC22][C@@H]3c4c([nh]n4OC(=C3C#N)N)C(C)C                          |
| ZINC08442041 | 4.29  | 6.38              | -61.09           | 1        | 8           | -1     | 481.337         | 10             | c1ccc(cc1)OCC(NH+)[2CCOC22][C@@H]3c4c([nh]n4OC(=C3C#N)N)C(C)C                             |
| ZINC08442040 | 2.97  | 7.5               | -12.01           | 2        | 9           | 0      | 461.522         | 5              | CC(C)OC(=O)N1CC=C2[C@H](C1)[C@H]([C@H](C2C#N)N)C#N)C3ccc3OC                               |
| ZINC08442040 | 3.05  | 2.34              | -43.39           | 2        | 9           | 1      | 462.53          | 5              | CC(C)OC(=O)N1CC=C2[C@H](C1)[C@H]([C@H](C2C#N)N)C#N)C3ccc3OC                               |
| ZINC08442038 | 3.53  | -1.64             | -15.78           | 1        | 8           | 0      | 427.482         | 10             | CCOC(=O)c1ccc(cc1)NC(=O)CSc2nnc(o2)Cc3ccc(c3)OC                                           |

Supplementary Table S2:

Detailed table of XP Docking using Schrodinger's Glide module

| ZINC_ID      | sLogP | ApolarDesolvation | PolarDesolvation | H Donors | H Acceptors | Charge | MolecularWeight | RotatableBonds | SMILES                                                                                            |
|--------------|-------|-------------------|------------------|----------|-------------|--------|-----------------|----------------|---------------------------------------------------------------------------------------------------|
| ZINC13161523 | 5.19  | 11.17             | -19.87           | 1        | 7           | 0      | 457.578         | 4              | [H]/N=C1/[C@H](C2=CCN(C[C@H]2)[C@H](C1(C#N)C#N)c3ccc(cc3)C(C)(C)C(=O)OC(C)(C)C#N                  |
| ZINC08442036 | 3.7   | 9.39              | -14.93           | 2        | 9           | 0      | 479.496         | 4              | c1ccc(cc1)COC(=O)N2CC=C3[C@H](C2)[C@H](C1(C(=O)C#N)N)(C#N)C#N)c4ccc5c(c4)OC(=O)C                  |
| ZINC08442036 | 3.78  | 1.08              | -51.89           | 2        | 9           | 1      | 480.504         | 4              | c1ccc(cc1)COC(=O)N2CC=C3[C@H](C2)[C@H](C1(C(=O)C#N)N)(C#N)C#N)c4ccc5c(c4)OC(=O)C                  |
| ZINC08442035 | 2.86  | 9.8               | -19.83           | 2        | 10          | 0      | 497.577         | 12             | Cn1c[nmc1SCC(=O)Nc2ccc(cc2)C(=O)OC]CNC(=O)c3ccc(cc3)OC                                            |
| ZINC08442033 | 5.6   | 3.24              | -13.25           | 1        | 7           | 0      | 491.595         | 5              | [H]/N=C1/[C@H](C2=CCN(C[C@H]2)[C@H](C1(C#N)C#N)c3ccc(cc3)C(C)(C)C(=O)OCc4cccc4)C#N                |
| ZINC08442032 | 2.48  | -0.7              | -19.32           | 2        | 10          | 0      | 483.55          | 11             | CCOC(=O)c1ccc(cc1)NC(=O)CSc2nnc(n2)CNC(=O)c3ccc(cc3)OC                                            |
| ZINC08442031 | 4.78  | 10.52             | -12.87           | 2        | 8           | 0      | 519.483         | 6              | c1ccc(cc1)COC(=O)N2CC=C3[C@H](C2)[C@H](C1(C(=O)C#N)N)(C#N)C#N)c4ccc(cc4)OC(F)F                    |
| ZINC08442031 | 4.86  | 9.61              | -50.29           | 2        | 8           | 1      | 520.491         | 6              | c1ccc(cc1)COC(=O)N2CC=C3[C@H](C2)[C@H](C1(C(=O)C#N)N)(C#N)C#N)c4ccc(cc4)OC(F)F                    |
| ZINC08442030 | 4.06  | 10.85             | -14.46           | 2        | 7           | 0      | 471.467         | 4              | c1ccc(cc1)COC(=O)N2CC=C3[C@H](C2)[C@H](C1(C(=O)C#N)N)(C#N)C#N)c4ccc(cc4)F                         |
| ZINC08442030 | 4.15  | 3.39              | -52.78           | 2        | 7           | 1      | 472.475         | 4              | c1ccc(cc1)COC(=O)N2CC=C3[C@H](C2)[C@H](C1(C(=O)C#N)N)(C#N)C#N)c4ccc(cc4)F                         |
| ZINC08442029 | 2.38  | -1.59             | -14.66           | 2        | 8           | 0      | 431.562         | 8              | C[C@H]1CCCC[C@H]1NC(=O)CSc2nnc(n2)CNC(=O)c3ccc(cc3)OC                                             |
| ZINC08442028 | 3.59  | 10.87             | -13.32           | 2        | 7           | 0      | 471.467         | 4              | c1ccc(cc1)COC(=O)N2CC=C3[C@H](C2)[C@H](C1(C(=O)C#N)N)(C#N)C#N)c4ccc(cc4)F                         |
| ZINC08442028 | 3.67  | 3.36              | -49.25           | 2        | 7           | 1      | 472.475         | 4              | c1ccc(cc1)COC(=O)N2CC=C3[C@H](C2)[C@H](C1(C(=O)C#N)N)(C#N)C#N)c4ccc(cc4)F                         |
| ZINC08442027 | 2.98  | 7.67              | -11.54           | 2        | 7           | 0      | 458.341         | 3              | CCOC(=O)N1CC=C2[C@H](C1)[C@H](C(C(=O)C#N)N)(C#N)C#N)c3cc(c3)Br                                    |
| ZINC08442027 | 3.06  | 0.28              | -47.2            | 2        | 7           | 1      | 459.349         | 3              | CCOC(=O)N1CC=C2[C@H](C1)[C@H](C(C(=O)C#N)N)(C#N)C#N)c3cc(c3)Br                                    |
| ZINC0633764  | 2.38  | -2.1              | -15.21           | 2        | 8           | 0      | 431.562         | 8              | C[C@H]1CCCC[C@H]1NC(=O)CSc2nnc(n2)CNC(=O)c3ccc(cc3)OC                                             |
| ZINC08442026 | 2.69  | 6.62              | -13.44           | 2        | 7           | 0      | 427.386         | 3              | CC(=O)N1CC=C2[C@H](C1)[C@H](C(C(=O)C#N)N)(C#N)C#N)c3ccc(cc3)OC(F)F                                |
| ZINC08442026 | 2.78  | 5.79              | -51.39           | 2        | 7           | 1      | 428.394         | 3              | CC(=O)N1CC=C2[C@H](C1)[C@H](C(C(=O)C#N)N)(C#N)C#N)c3ccc(cc3)OC(F)F                                |
| ZINC08442025 | 3.74  | 1.88              | -67.92           | 2        | 7           | 1      | 436.495         | 3              | [H]/N=C1/[C@H](C2=CCN(C)[C@H]2)[C@H](C1(C#N)C#N)c3ccc(cc3)OC(=O)C4C5cccc5C#N                      |
| ZINC08442025 | 3.74  | 1.71              | -125.63          | 3        | 7           | 2      | 437.503         | 3              | c1ccc(cc1)C[NH+]2CC=C3[C@H](C2)[C@H](C1(C(=O)C#N)N)(C#N)C#N)c4ccc5c(c4)OC(=O)C                    |
| ZINC08442023 | 3.42  | 8.13              | -11.26           | 1        | 7           | 0      | 451.53          | 5              | [H]/N=C1/[C@H](C2=CCN(C)[C@H]2)[C@H](C1(C#N)C#N)c3ccc(cc3)OC(C)C4cccc4)C#N                        |
| ZINC08442023 | 3.42  | 2.44              | -111.03          | 3        | 7           | 2      | 453.546         | 5              | COc1ccc(cc1)[C@H]2[C@H]3C[NH+]1CC=C3[C@H](C1(C(=O)C#N)N)(C#N)C#N)c4ccc5c(c4)OC(=O)C               |
| ZINC08442021 | 3.14  | 6.78              | -11.82           | 2        | 9           | 0      | 516.646         | 9              | CCCN1CC=C2[C@H](C1)[C@H](C(C(=O)C#N)N)(C#N)C#N)c3ccc(cc3)OC(=O)C4C5COC4                           |
| ZINC08442021 | 3.23  | 1.75              | -177.51          | 4        | 9           | 3      | 519.67          | 9              | CCCN1CC=C2[C@H](C1)[C@H](C(C(=O)C#N)N)(C#N)C#N)c3ccc(cc3)OC(=O)C4C5COC4                           |
| ZINC08442021 | 3.14  | 9.15              | -43.15           | 3        | 9           | 1      | 517.654         | 9              | CCCN1CC=C2[C@H](C1)[C@H](C(C(=O)C#N)N)(C#N)C#N)c3ccc(cc3)OC(=O)C4C5COC4                           |
| ZINC0633767  | 2.38  | -2.13             | -15.09           | 2        | 8           | 0      | 431.562         | 8              | C[C@H]1CCCC[C@H]1NC(=O)CSc2nnc(n2)CNC(=O)c3ccc(cc3)OC                                             |
| ZINC08442020 | 3.2   | 6.65              | -7.29            | 2        | 5           | 0      | 428.359         | 2              | CC(C)N1CC=C2[C@H](C1)[C@H](C(C(=O)C#N)N)(C#N)C#N)c3cc(c3)Br                                       |
| ZINC08442020 | 3.28  | 0.97              | -112.97          | 3        | 5           | 2      | 430.375         | 2              | CC(C)[NH+]1CC=C2[C@H](C1)[C@H](C(C(=O)C#N)N)(C#N)C#N)c3cc(c3)Br                                   |
| ZINC08442019 | 5.04  | 9.4               | -8.48            | 2        | 5           | 0      | 422.479         | 4              | CC(C)[C@H]1CC=C2[C@H](C1)[C@H](C(C(=O)C#N)N)(C#N)C#N)c3ccc3OC(F)F                                 |
| ZINC08442019 | 5.13  | 4.57              | -38.78           | 2        | 5           | 1      | 423.487         | 4              | CC(C)[C@H]1CC=C2[C@H](C1)[C@H](C(C(=O)C#N)N)(C#N)C#N)c3ccc3OC(F)F                                 |
| ZINC08442018 | 2.38  | -1.55             | -14.69           | 2        | 8           | 0      | 431.562         | 8              | C[C@H]1CCCC[C@H]1NC(=O)CSc2nnc(n2)CNC(=O)c3ccc(cc3)OC                                             |
| ZINC08442017 | 5.04  | 9.79              | -9.18            | 2        | 5           | 0      | 422.479         | 4              | CC(C)[C@H]1CC=C2[C@H](C1)[C@H](C(C(=O)C#N)N)(C#N)C#N)c3ccc3OC(F)F                                 |
| ZINC08442017 | 5.13  | 4.43              | -41.59           | 2        | 5           | 1      | 423.487         | 4              | CC(C)[C@H]1CC=C2[C@H](C1)[C@H](C(C(=O)C#N)N)(C#N)C#N)c3ccc3OC(F)F                                 |
| ZINC08442016 | 5.92  | 8.94              | -7.73            | 2        | 5           | 0      | 440.469         | 4              | CC(C)[C@H]1CC=C2[C@H](C1)[C@H](C(C(=O)C#N)N)(C#N)C#N)c3ccc(cc3)OC(F)F                             |
| ZINC08442016 | 6     | 4.46              | -41.11           | 2        | 5           | 1      | 441.477         | 4              | CC(C)[C@H]1CC=C2[C@H](C1)[C@H](C(C(=O)C#N)N)(C#N)C#N)c3ccc(cc3)OC(F)F                             |
| ZINC0633758  | 3.88  | -0.75             | -13.8            | 0        | 7           | 0      | 451.596         | 7              | Cc1ccc(c1)OCc2nnc(n2)CSC(=O)N3CCN(CC3)c4ccc4C                                                     |
| ZINC08442015 | 5.92  | 9.89              | -8.65            | 2        | 5           | 0      | 440.469         | 4              | CC(C)[C@H]1CC=C2[C@H](C1)[C@H](C(C(=O)C#N)N)(C#N)C#N)c3ccc(cc3)OC(F)F                             |
| ZINC08442015 | 6     | 4.83              | -44.37           | 2        | 5           | 1      | 441.477         | 4              | CC(C)[C@H]1CC=C2[C@H](C1)[C@H](C(C(=O)C#N)N)(C#N)C#N)c3ccc(cc3)OC(F)F                             |
| ZINC08442014 | 2.35  | 5.36              | -13.54           | 1        | 9           | 0      | 488.592         | 7              | [H]/N=C1/[C@H](C2=CCN(C)[C@H]2)[C@H](C1(C#N)C#N)c3ccc(cc3)OC(=O)C4C5COC4)C#N                      |
| ZINC08442014 | 2.35  | 1.58              | -172.38          | 4        | 9           | 3      | 491.616         | 7              | COc1ccc(cc1)OC[NH+]2CC(=O)C2[C@H]3[C@H]4C[NH+]1CC=C4[C@H](C1(C(=O)C#N)N)(C#N)C#N)c3ccc(cc3)OC(F)F |
| ZINC08442014 | 2.35  | 7.64              | -44.57           | 2        | 9           | 1      | 489.6           | 7              | [H]/N=C1/[C@H](C2=CCN(C)[C@H]2)[C@H](C1(C#N)C#N)c3ccc(cc3)OC(=O)C4C5COC4)C#N                      |
| ZINC17147048 | 5.53  | 8.16              | -44.5            | 1        | 4           | -1     | 419.448         | 2              | c1c(c2c3c(c(c2)O)[nH]3)O]1sc2nc1c45CC6C(C4)CC(C6)C5)C(F)F                                         |
| ZINC0633754  | 4.25  | 13.91             | -14.07           | 0        | 7           | 0      | 465.623         | 8              | Cn1c[nmc1SCC(=O)N2CCN(C2)c3ccc3)COe4c(ccc4)C                                                      |
| ZINC08442012 | 4.06  | 3.22              | -18.48           | 1        | 9           | 0      | 493.523         | 6              | [H]/N=C1/[C@H](C2=CCN(C)[C@H]2)[C@H](C1(C#N)C#N)c3ccc(cc3)C(=O)OCc4cccc4)C#N                      |
| ZINC08442012 | 4.06  | 3.04              | -54.78           | 2        | 9           | 1      | 494.531         | 6              | COC(=O)c1ccc(cc1)[C@H]2[C@H]3CN(CC=C3)[C@H](C1(C(=O)C#N)N)(C#N)C#N)c(=O)OCc4cccc4                 |
| ZINC08442011 | 2.07  | -3.36             | -16.13           | 1        | 9           | 0      | 480.594         | 8              | Cn1c[nmc1SCC(=O)N2CCN(C2)c3ccc3)CNC(=O)c4ccc(cc4)OC                                               |
| ZINC08442010 | 4.1   | 8.42              | -10.06           | 2        | 7           | 0      | 446.551         | 5              | CC(C)[C@H]1CC=C2[C@H](C1)[C@H](C(C(=O)C#N)N)(C#N)C#N)c3ccc(cc3)OC(=O)C                            |
| ZINC08442010 | 4.19  | 3.86              | -39.86           | 2        | 7           | 1      | 447.559         | 5              | CC(C)[C@H]1CC=C2[C@H](C1)[C@H](C(C(=O)C#N)N)(C#N)C#N)c3ccc(cc3)OC(=O)C                            |
| ZINC08442009 | 4.1   | 8.78              | -10.56           | 2        | 7           | 0      | 446.551         | 5              | CC(C)[C@H]1CC=C2[C@H](C1)[C@H](C(C(=O)C#N)N)(C#N)C#N)c3ccc(cc3)OC(=O)C                            |
| ZINC08442009 | 4.19  | 3.74              | -42.84           | 2        | 7           | 1      | 447.559         | 5              | CC(C)[C@H]1CC=C2[C@H](C1)[C@H](C(C(=O)C#N)N)(C#N)C#N)c3ccc(cc3)OC(=O)C                            |
| ZINC08442007 | 3.74  | 6.53              | -18.47           | 4        | 7           | 0      | 429.524         | 5              | CC(C)[C@H]1CC=C2[C@H](C1)[C@H](C(C(=O)C#N)N)(C#N)C#N)c3ccc(cc3)OC(=O)N                            |
| ZINC08442007 | 3.82  | 0.3               | -49.6            | 4        | 7           | 1      | 430.532         | 5              | CC(C)[C@H]1CC=C2[C@H](C1)[C@H](C(C(=O)C#N)N)(C#N)C#N)c3ccc(cc3)OC(=O)N                            |
| ZINC08442006 | 3.74  | 7.48              | -20.39           | 4        | 7           | 0      | 429.524         | 5              | CC(C)[C@H]1CC=C2[C@H](C1)[C@H](C(C(=O)C#N)N)(C#N)C#N)c3ccc(cc3)OC(=O)N                            |
| ZINC08442006 | 3.82  | 0.67              | -52.53           | 4        | 7           | 1      | 430.532         | 5              | CC(C)[C@H]1CC=C2[C@H](C1)[C@H](C(C(=O)C#N)N)(C#N)C#N)c3ccc(cc3)OC(=O)N                            |
| ZINC08442005 | 0.75  | -1.21             | -52.15           | 2        | 9           | 1      | 433.558         | 8              | Cn1c[nmc1SCC(=O)N2CCN(C2)c3ccc3)CNC(=O)c3ccc(cc3)OC                                               |
| ZINC08442004 | 4.02  | 3.6               | -71.24           | 2        | 7           | 1      | 450.522         | 5              | [H]/N=C1/[C@H](C2=CCN(C)[C@H]2)[C@H](C1(C#N)C#N)c3ccc(cc3)C(=O)OCc4cccc4)C#N                      |
| ZINC08442004 | 4.02  | 3.43              | -132.18          | 3        | 7           | 2      | 451.53          | 5              | COC(=O)c1ccc(cc1)[C@H]2[C@H]3C[NH+]1CC=C3[C@H](C1(C(=O)C#N)N)(C#N)C#N)c4ccc4                      |
| ZINC0633747  | 2.04  | -2.46             | -17.12           | 2        | 8           | 0      | 439.541         | 10             | Cn1c[nmc1SCC(=O)N2CC2c2ccc2)CNC(=O)c3ccc(cc3)OC                                                   |
| ZINC01107286 | 4.79  | 6.61              | -10.71           | 3        | 7           | 0      | 444.535         | 6              | Cc1c2c(n[nH]1)OC(=C1[C@H]2c3ccc(cc3)COc4ccc(cc4)C(C)(C)OC)C#N                                     |
| ZINC01107287 | 4.79  | 6.7               | -10.7            | 3        | 7           | 0      | 444.535         | 6              | Cc1c2c(n[nH]1)OC(=C1[C@H]2c3ccc(cc3)COc4ccc(cc4)C(C)(C)OC)C#N                                     |





**Supplementary Table S2:**  
**Detailed table of XP Docking using Schrodinger's Glide module**

| ZINC_ID      | sLogP | ApolarDesolvation | PolarDesolvation | H Donors | H Acceptors | Charge | MolecularWeight | RotatableBonds | SMILES                                                                                  |
|--------------|-------|-------------------|------------------|----------|-------------|--------|-----------------|----------------|-----------------------------------------------------------------------------------------|
| ZINC08441975 | 6.14  | 12.25             | -9.61            | 1        | 5           | 0      | 484.408         | 4              | COC1ccc(cc1OC)[C@H]2CC(=Nc3cccc3S2)c4[nH]c5cc(c(cc5n4)C)Cl                              |
| ZINC08441974 | 3.46  | 2.36              | -15.45           | 1        | 9           | 0      | 495.539         | 6              | [H]/N=C1/[C@@H]([C2=CCN(C)[C@@H]2[C@H]([C1(C#N)C#N]c3ccc(cc3OC)OC)C(=O)OCc4cccc4)C#N    |
| ZINC08441974 | 3.46  | 2.18              | -46.82           | 2        | 9           | 1      | 496.547         | 6              | COC1ccc(c1OC)[C@@H]2[C@H]3CN(CC=C3[C@H]([C1(C#N)C#N]c3ccc(cc3OC)OC)C(=O)OCc4cccc4)C#N   |
| ZINC08441973 | 3.54  | 2.44              | -17.15           | 1        | 9           | 0      | 495.539         | 6              | [H]/N=C1/[C@@H]([C2=CCN(C)[C@@H]2[C@H]([C1(C#N)C#N]c3ccc(cc3OC)OC)C(=O)OCc4cccc4)C#N    |
| ZINC08441973 | 3.54  | 2.26              | -51.3            | 2        | 9           | 1      | 496.547         | 6              | COC1ccc(cc1OC)[C@@H]2[C@H]3CN(CC=C3[C@H]([C1(C#N)C#N]c3ccc(cc3OC)OC)C(=O)OCc4cccc4)C#N  |
| ZINC08441972 | 3.24  | 9.96              | -19.19           | 1        | 9           | 0      | 495.539         | 6              | [H]/N=C1/[C@@H]([C2=CCN(C)[C@@H]2[C@H]([C1(C#N)C#N]c3ccc(cc3OC)OC)C(=O)OCc4cccc4)C#N    |
| ZINC08441972 | 3.24  | 2.33              | -48.45           | 2        | 9           | 1      | 496.547         | 6              | COC1ccc(c1OC)[C@@H]2[C@H]3CN(CC=C3[C@H]([C1(C#N)C#N]c3ccc(cc3OC)OC)C(=O)OCc4cccc4)C#N   |
| ZINC06446605 | 2.28  | 8.91              | -12.09           | 2        | 8           | 0      | 425.448         | 4              | c1ccc(cc1)COC(=O)N2CC=C3[C@H]([C2])C@H([C1(C#N)C#N]c3ccc(cc3OC)OC)C(=O)OCc4cccc4        |
| ZINC06446605 | 2.37  | 2.69              | -46.29           | 2        | 8           | 1      | 426.456         | 4              | c1ccc(cc1)COC(=O)N2CC=C3[C@H]([C2])C@H([C1(C#N)C#N]c3ccc(cc3OC)OC)C(=O)OCc4cccc4        |
| ZINC08441971 | 6.14  | 12.25             | -9.6             | 1        | 5           | 0      | 484.408         | 4              | COC1ccc(cc1OC)[C@@H]2CC(=Nc3cccc3S2)c4[nH]c5cc(c(cc5n4)C)Cl                             |
| ZINC08441970 | 3.57  | 10.12             | -20.54           | 1        | 8           | 0      | 483.503         | 5              | [H]/N=C1/[C@@H]([C2=CCN(C)[C@@H]2[C@H]([C1(C#N)C#N]c3ccc(cc3F)OC)C(=O)OCc4cccc4)C#N     |
| ZINC08441970 | 3.57  | 2.64              | -46.02           | 2        | 8           | 1      | 484.511         | 5              | COC1ccc(c1)[C@@H]2[C@H]3CN(CC=C3[C@H]([C1(C#N)C#N]c3ccc(cc3OC)OC)C(=O)OCc4cccc4)F       |
| ZINC06446604 | 3.23  | 10.15             | -11.52           | 2        | 7           | 0      | 441.516         | 4              | c1ccc(cc1)COC(=O)N2CC=C3[C@H]([C2])C@H([C1(C#N)C#N]c3ccc(cc3OC)OC)C(=O)OCc4cccc4        |
| ZINC06446604 | 3.32  | 1.22              | -45.46           | 2        | 7           | 1      | 442.524         | 4              | c1ccc(cc1)COC(=O)N2CC=C3[C@H]([C2])C@H([C1(C#N)C#N]c3ccc(cc3OC)OC)C(=O)OCc4cccc4        |
| ZINC08441969 | 4.18  | 11.28             | -13.05           | 2        | 7           | 0      | 503.484         | 5              | c1ccc(cc1)COC(=O)N2CC=C3[C@H]([C2])C@H([C1(C#N)C#N]c3ccc(cc3OC)OC)C(=O)OCc4cccc4        |
| ZINC08441969 | 4.27  | 3.58              | -45.45           | 2        | 7           | 1      | 504.492         | 5              | c1ccc(cc1)COC(=O)N2CC=C3[C@H]([C2])C@H([C1(C#N)C#N]c3ccc(cc3OC)OC)C(=O)OCc4cccc4        |
| ZINC08441968 | 4.42  | -1.68             | -33.3            | 4        | 6           | 0      | 546.762         | 12             | Cc1ccc(c1NC(=S)NC(=O)c2ccc(cc2)C(=O)NC(=S)N3c4cccc3CC)CC                                |
| ZINC08441966 | 3.51  | 9.19              | -13.62           | 2        | 8           | 0      | 453.502         | 4              | CCOC(=O)N1CC=C2[C@H]([C1])C@H([C1(C#N)C#N]c3ccc(cc3OC)OC)C(=O)OCc4cccc4                 |
| ZINC08441966 | 3.59  | 2.01              | -49.3            | 2        | 8           | 1      | 454.51          | 4              | CCOC(=O)N1CC=C2[C@H]([C1])C@H([C1(C#N)C#N]c3ccc(cc3OC)OC)C(=O)OCc4cccc4                 |
| ZINC05316280 | 5.13  | -1.25             | -11.38           | 2        | 7           | 0      | 501.558         | 7              | CC1=NC(=C)[C@@H]([C1(C#N)C#N]c3ccc(cc3OC)OC)C(=O)OCc4cccc4                              |
| ZINC05316280 | 5.31  | -1.65             | -11.64           | 2        | 7           | 0      | 501.558         | 7              | CC1=NC(=C)[C@@H]([C1(C#N)C#N]c3ccc(cc3OC)OC)C(=O)OCc4cccc4                              |
| ZINC05316280 | 5.31  | 0.17              | -19.04           | 2        | 7           | 0      | 501.558         | 7              | CC1=NC(=C)[C@@H]([C1(C#N)C#N]c3ccc(cc3OC)OC)C(=O)OCc4cccc4                              |
| ZINC05316280 | 5.13  | -1.19             | -11.97           | 2        | 7           | 0      | 501.558         | 7              | CC1=NC(=C)[C@@H]([C1(C#N)C#N]c3ccc(cc3OC)OC)C(=O)OCc4cccc4                              |
| ZINC08441965 | 4.54  | 2.97              | -63.76           | 2        | 6           | 1      | 472.572         | 4              | [H]/N=C1/[C@@H]([C2=CCN(C)[C@@H]2[C@H]([C1(C#N)C#N]c3ccc(cc3OC)OC)C(=O)OCc4cccc4)C#N    |
| ZINC08441965 | 4.54  | 2.8               | -123.58          | 3        | 6           | 2      | 473.58          | 4              | [H]/N=C1/[C@@H]([C2=CCN(C)[C@@H]2[C@H]([C1(C#N)C#N]c3ccc(cc3OC)OC)C(=O)OCc4cccc4)C#N    |
| ZINC08441964 | 4.08  | -1.21             | -7.67            | 0        | 3           | 0      | 285.387         | 7              | CCCCCCCCN=C1/CC(=O)C(=O)c2c1ccc2                                                        |
| ZINC08441962 | 5.31  | 12.54             | -14.67           | 2        | 5           | 0      | 473.623         | 7              | CC1=C([C@@H]([C1(C#N)C#N]c3ccc(cc3OC)OC)C(=O)OCc4cccc4)C#N                              |
| ZINC08441962 | 5.83  | 0.23              | -19.16           | 1        | 5           | 0      | 473.623         | 7              | COC1ccc(c1)CSC2=NC(=C)C([C@@H]([C@H]2C#N]c3ccc3)C(=O)OCc4cccc4                          |
| ZINC08441962 | 5.83  | -1.72             | -11.52           | 1        | 5           | 0      | 473.623         | 7              | COC1ccc(c1)CSC2=NC(=C)C([C@@H]([C@H]2C#N]c3ccc3)C(=O)OCc4cccc4                          |
| ZINC08441962 | 5.64  | -1.18             | -10.61           | 1        | 5           | 0      | 473.623         | 7              | CC1=C([C@@H]([C1(C#N)C#N]c3ccc(cc3OC)OC)C(=O)OCc4cccc4)C#N                              |
| ZINC08441961 | 7.75  | 12.32             | -18.58           | 2        | 7           | 0      | 617.752         | 8              | c1ccc(cc1)[C@H](c2cc3ccc3[nH]2)(c4c5ccc5n4S(=O)(=O)c6ccc6)NS(=O)(=O)c7ccc7              |
| ZINC0061509  | 2.28  | 5.82              | -6.96            | 0        | 4           | 0      | 194.186         | 4              | COC(=O)C1ccc(cc1)C(=O)OC                                                                |
| ZINC03770286 | 6.95  | -1.21             | -12.88           | 1        | 6           | 0      | 505.599         | 3              | CCOC1ccc(cc1)[C@@H]2C3=C(c4cccc4CC3)N=c5n2c(=O)/c(=C/6/c7ccc7NC6=O)/s5                  |
| ZINC03770288 | 6.95  | -1.22             | -13.42           | 1        | 6           | 0      | 505.599         | 3              | CCOC1ccc(cc1)[C@@H]2C3=C(c4cccc4CC3)N=c5n2c(=O)/c(=C/6/c7ccc7NC6=O)/s5                  |
| ZINC08441960 | 5.31  | 12.54             | -14.67           | 2        | 5           | 0      | 473.623         | 7              | CC1=C([C@@H]([C1(C#N)C#N]c3ccc(cc3OC)OC)C(=O)OCc4cccc4)C#N                              |
| ZINC08441960 | 5.64  | -1.3              | -10.83           | 1        | 5           | 0      | 473.623         | 7              | CC1=C([C@@H]([C1(C#N)C#N]c3ccc(cc3OC)OC)C(=O)OCc4cccc4)C#N                              |
| ZINC08441960 | 5.83  | -1.62             | -11.72           | 1        | 5           | 0      | 473.623         | 7              | COC1ccc(c1)CSC2=NC(=C)C([C@@H]([C@H]2C#N]c3ccc3)C(=O)OCc4cccc4                          |
| ZINC08441960 | 5.83  | -0.07             | -12.39           | 1        | 5           | 0      | 473.623         | 7              | COC1ccc(c1)CSC2=NC(=C)C([C@@H]([C@H]2C#N]c3ccc3)C(=O)OCc4cccc4                          |
| ZINC08441959 | 6.41  | -2.54             | -13.12           | 1        | 5           | 0      | 467.575         | 1              | c1ccc2(c1)CCC3=C2N=c4n(c(=O)/c(=C/5/c6ccc6NC5=O)/s4)[C@@H]3c7ccc7                       |
| ZINC08441958 | 4.59  | 11.36             | -11.92           | 2        | 7           | 0      | 514.383         | 4              | c1ccc(cc1)COC(=O)N2CC=C3[C@H]([C2])C@H([C1(C#N)C#N]c3ccc(cc3OC)OC)C(=O)OCc4cccc4        |
| ZINC08441958 | 4.68  | 1.16              | -47.39           | 2        | 7           | 1      | 515.391         | 4              | c1ccc(cc1)COC(=O)N2CC=C3[C@H]([C2])C@H([C1(C#N)C#N]c3ccc(cc3OC)OC)C(=O)OCc4cccc4        |
| ZINC08441957 | 7.95  | 2.32              | -79.6            | 0        | 6           | -1     | 547.587         | 4              | c1ccc2(c1)CCC3=C2N=c4n(c(=O)/c(=C/5/c6ccc6)C(=O)OC)C(=O)OCc4cccc4                       |
| ZINC08441956 | 4.46  | 11.25             | -12.04           | 2        | 7           | 0      | 469.932         | 4              | c1ccc(cc1)COC(=O)N2CC=C3[C@H]([C2])C@H([C1(C#N)C#N]c3ccc(cc3OC)OC)C(=O)OCc4cccc4        |
| ZINC08441956 | 4.55  | 1.78              | -47.48           | 2        | 7           | 1      | 470.94          | 4              | c1ccc(cc1)COC(=O)N2CC=C3[C@H]([C2])C@H([C1(C#N)C#N]c3ccc(cc3OC)OC)C(=O)OCc4cccc4        |
| ZINC08441955 | 7.95  | 2.42              | -79.06           | 0        | 6           | -1     | 547.587         | 4              | c1ccc2(c1)CCC3=C2N=c4n(c(=O)/c(=C/5/c6ccc6)C(=O)OC)C(=O)OCc4cccc4                       |
| ZINC08441953 | 3.43  | 10.25             | -21.76           | 1        | 8           | 0      | 465.513         | 5              | [H]/N=C1/[C@@H]([C2=CCN(C)[C@@H]2[C@H]([C1(C#N)C#N]c3ccc(cc3OC)OC)C(=O)OCc4cccc4)C#N    |
| ZINC08441953 | 3.43  | 2.07              | -44.01           | 2        | 8           | 1      | 466.521         | 5              | COC1ccc(c1)[C@@H]2[C@H]3CN(CC=C3[C@H]([C1(C#N)C#N]c3ccc(cc3OC)OC)C(=O)OCc4cccc4)C#N     |
| ZINC08441952 | 9.77  | 1.92              | -13.69           | 0        | 4           | 0      | 613.541         | 5              | c1ccc2(c1)CCC3=C2N=c4n(c(=O)/c(=C/5/c6ccc6)C(=O)OC)C(=O)OCc4cccc4                       |
| ZINC08441951 | 4.42  | 10.66             | -16.91           | 1        | 9           | 0      | 523.593         | 8              | [H]/N=C1/[C@@H]([C2=CCN(C)[C@@H]2[C@H]([C1(C#N)C#N]c3ccc(cc3OC)OC)C(=O)OCc4cccc4)C#N    |
| ZINC08441951 | 4.42  | 10.75             | -51.39           | 2        | 9           | 1      | 524.601         | 8              | CCOC1ccc(cc1OC)[C@@H]2[C@H]3CN(CC=C3[C@H]([C1(C#N)C#N]c3ccc(cc3OC)OC)C(=O)OCc4cccc4)C#N |
| ZINC08441950 | 9.77  | 1.8               | -11.2            | 0        | 4           | 0      | 613.541         | 5              | c1ccc2(c1)CCC3=C2N=c4n(c(=O)/c(=C/5/c6ccc6)C(=O)OC)C(=O)OCc4cccc4                       |
| ZINC03770206 | 9.12  | 2.07              | -14.2            | 0        | 4           | 0      | 579.096         | 5              | c1ccc2(c1)CCC3=C2N=c4n(c(=O)/c(=C/5/c6ccc6)C(=O)OC)C(=O)OCc4cccc4                       |
| ZINC08441949 | 3.57  | 7.69              | -18.83           | 1        | 10          | 0      | 509.522         | 5              | [H]/N=C1/[C@@H]([C2=CCN(C)[C@@H]2[C@H]([C1(C#N)C#N]c3ccc(cc3OC)OC)C(=O)OCc5cccc5)C#N    |
| ZINC08441949 | 3.57  | 7.77              | -55.01           | 2        | 10          | 1      | 510.53          | 5              | COC1ccc(cc1OC)[C@@H]2[C@H]3CN(CC=C3[C@H]([C1(C#N)C#N]c3ccc(cc3OC)OC)C(=O)OCc5cccc5)C#N  |
| ZINC03770208 | 9.12  | 1.95              | -11.47           | 0        | 4           | 0      | 579.096         | 5              | c1ccc2(c1)CCC3=C2N=c4n(c(=O)/c(=C/5/c6ccc6)C(=O)OC)C(=O)OCc4cccc4                       |
| ZINC08441948 | 3.25  | 8.82              | -16.76           | 1        | 10          | 0      | 525.565         | 7              | [H]/N=C1/[C@@H]([C2=CCN(C)[C@@H]2[C@H]([C1(C#N)C#N]c3ccc(cc3OC)OC)C(=O)OCc4cccc4)C#N    |
| ZINC08441948 | 3.25  | 8.91              | -49.27           | 2        | 10          | 1      | 526.573         | 7              | COC1ccc(c1OC)OC[C@@H]2[C@H]3CN(CC=C3[C@H]([C1(C#N)C#N]c3ccc(cc3OC)OC)C(=O)OCc4cccc4)C#N |
| ZINC03770229 | 8.49  | 2.01              | -12.7            | 0        | 4           | 0      | 544.651         | 5              | c1ccc(cc1)COC2ccc2/C=C/c3/c(=O)n4c(=NC5=C([C@H]4c6ccc6)F)CCc7c5ccc7/s3                  |
| ZINC08441947 | 3.82  | 2.92              | -56.32           | 2        | 6           | 1      | 424.528         | 3              | [H]/N=C1/[C@@H]([C2=CCN(C)[C@@H]2[C@H]([C1(C#N)C#N]c3ccc(cc3OC)OC)C(=O)OCc5cccc5)C#N    |
| ZINC08441947 | 3.82  | 2.75              | -114.58          | 3        | 6           | 2      | 425.536         | 3              | CC(C)N+1CC=C2[C@H]([C1])C@H([C1(C#N)C#N]c3ccc(cc3OC)OC)C(=O)OCc4cccc4                   |
| ZINC03770231 | 8.49  | 2.13              | -15.44           | 0        | 4           | 0      | 544.651         | 5              | c1ccc(cc1)COC2ccc2/C=C/c3/c(=O)n4c(=NC5=C([C@H]4c6ccc6)F)CCc7c5ccc7/s3                  |

Supplementary Table S2:

Detailed table of XP Docking using Schrodinger's Glide module

| ZINC_ID      | sLogP | ApolarDesolvation | PolarDesolvation | H Donors | H Acceptors | Charge | MolecularWeight | RotatableBonds | SMILES                                                                            |
|--------------|-------|-------------------|------------------|----------|-------------|--------|-----------------|----------------|-----------------------------------------------------------------------------------|
| ZINC03770224 | 8.06  | 0.88              | -10.9            | 0        | 4           | 0      | 561.476         | 4              | CCOC1ccc(cc1Br)/C=C/2\c(=O)n3c(=NC4=C(C@H)3c5cccc(c5)F)CC6c4cccc6)s2              |
| ZINC08441946 | 0.26  | 0.37              | -23.57           | 5        | 11          | 0      | 427.417         | 9              | CCOC(=O)Cc1c2c(nH1)OC(=C(C@H)2c3ccc(c3)OC)OCC(=O)N(C#N)N                          |
| ZINC03770226 | 8.06  | 1.01              | -13.37           | 0        | 4           | 0      | 561.476         | 4              | CCOC1ccc(cc1Br)/C=C/2\c(=O)n3c(=NC4=C(C@H)3c5cccc(c5)F)CC6c4cccc6)s2              |
| ZINC08441945 | 0.26  | 0.37              | -23.87           | 5        | 11          | 0      | 427.417         | 9              | CCOC(=O)Cc1c2c(nH1)OC(=C(C@H)2c3ccc(c3)OC)OCC(=O)N(C#N)N                          |
| ZINC08441944 | 8.61  | 2.73              | -10.78           | 0        | 4           | 0      | 562.641         | 5              | c1ccc2c(c1)CCC3=C2N=C4n(c=O)/c(=C)\c5cccc5OC6cccc6P/s4][C@H]3c7cccc(c7)F          |
| ZINC08441943 | 3.69  | 5.05              | -10.58           | 3        | 6           | 0      | 423.27          | 3              | COc1ccc(cc1Br)[C@H]2c3c(nH)c3OC(=C2C#N)N)c4cccc4                                  |
| ZINC08441942 | 8.61  | 2.71              | -13.97           | 0        | 4           | 0      | 562.641         | 5              | c1ccc2c(c1)CCC3=C2N=C4n(c=O)/c(=C)\c5cccc5OC6cccc6P/s4][C@H]3c7cccc(c7)F          |
| ZINC08441941 | 3.69  | 5.12              | -10.42           | 3        | 6           | 0      | 423.27          | 3              | COc1ccc(cc1Br)[C@H]2c3c(nH)c3OC(=C2C#N)N)c4cccc4                                  |
| ZINC08441940 | 9.25  | 2.42              | -13.65           | 0        | 4           | 0      | 597.509         | 3              | Cc1ccc(c(c1)Br)c2ccc(o2)/C=C/3\c(=O)n4c(=NC5=C(C@H)4c6cccc(c6)F)CCc7c5cccc7)s3    |
| ZINC08441939 | 9.25  | 2.45              | -16.67           | 0        | 4           | 0      | 597.509         | 3              | Cc1ccc(c(c1)Br)c2ccc(o2)/C=C/3\c(=O)n4c(=NC5=C(C@H)4c6cccc(c6)F)CCc7c5cccc7)s3    |
| ZINC08441938 | 4.38  | 1.96              | -15.58           | 0        | 5           | 0      | 442.537         | 8              | CCOC(=O)C1[C@H](C=C(N=C1)SCC(=O)c2ccc(cc2)F)C#N)c3ccc3                            |
| ZINC08441938 | 4.76  | 1.1               | -12              | 0        | 5           | 0      | 442.537         | 8              | CCOC(=O)C1=C(N=C(C@H)1c2ccc2)C#N)SCC(=O)c3ccc(cc3)F                               |
| ZINC08441938 | 4.94  | 0.17              | -11.99           | 0        | 5           | 0      | 442.537         | 8              | CCOC(=O)C1[C@H](C=C(N=C1)SCC(=O)c2ccc(cc2)F)C#N)c3ccc3                            |
| ZINC08441937 | 7.46  | -0.69             | -13.32           | 1        | 5           | 0      | 610.448         | 3              | COc1ccc(cc1O1)/C=C/2\c(=O)n3c(=NC4=C(C@H)3c5cccc(c5)F)CC6c4cccc6)s2               |
| ZINC08441936 | 6.79  | 1.07              | -9.92            | 0        | 3           | 0      | 444.556         | 2              | c1ccc2c(c1)CCC3=C2N=C4n(c=O)/c(=C)\c5cccc5/s4][C@H]3c6cccc(c6)F                   |
| ZINC08441935 | 4.38  | 1.85              | -13.3            | 0        | 5           | 0      | 442.537         | 8              | CCOC(=O)C1[C@H](C=C(N=C1)SCC(=O)c2ccc(cc2)F)C#N)c3ccc3                            |
| ZINC08441935 | 4.94  | 0.14              | -12.7            | 0        | 5           | 0      | 442.537         | 8              | CCOC(=O)C1[C@H](C=C(N=C1)SCC(=O)c2ccc(cc2)F)C#N)c3ccc3                            |
| ZINC08441935 | 4.76  | 1.14              | -10.81           | 0        | 5           | 0      | 442.537         | 8              | CCOC(=O)C1=C(N=C(C@H)1c2ccc2)C#N)SCC(=O)c3ccc(cc3)F                               |
| ZINC08441934 | 6.79  | 1.05              | -10.12           | 0        | 3           | 0      | 444.556         | 2              | c1ccc2c(c1)CCC3=C2N=C4n(c=O)/c(=C)\c5cccc5/s4][C@H]3c6cccc(c6)F                   |
| ZINC02416783 | 6.53  | 1.98              | -13.65           | 0        | 5           | 0      | 498.579         | 4              | COc1ccc(cc1OC)/C=C/2\c(=O)n3c(=NC4=C(C@H)3c5cccc(c5)F)CC6c4cccc6)s2               |
| ZINC08441933 | 3.77  | 7.86              | -10.38           | 2        | 7           | 0      | 431.54          | 7              | CCCN1CC=C2[C@H](C1)[C@H](C(C=C2C#N)N)(C#N)C#N)c3ccc(c(c3)OC)OCCC                  |
| ZINC08441933 | 3.85  | 2.81              | -119.31          | 3        | 7           | 2      | 433.556         | 7              | CC(C)NH+1CC=C2[C@H](C1)[C@H](C(C=C1)C(=NH2+))C2C#N)(C#N)C#N)c3ccc(c(c3)OC)OCCC    |
| ZINC02416785 | 6.53  | 2                 | -15.77           | 0        | 5           | 0      | 498.579         | 4              | COc1ccc(cc1OC)/C=C/2\c(=O)n3c(=NC4=C(C@H)3c5cccc(c5)F)CC6c4cccc6)s2               |
| ZINC08441932 | 3.85  | 3.34              | -63.37           | 2        | 7           | 1      | 432.548         | 7              | [H]/N=C1\1/C(C2=C(C)NH+)(C(C@H)2[C@H](C1(C#N)C#N)c3ccc(c(c3)OC)OCCC)C(C)C#N       |
| ZINC08441932 | 3.85  | 3.17              | -114.69          | 3        | 7           | 2      | 433.556         | 7              | CC(C)NH+1CC=C2[C@H](C1)[C@H](C(C=C1)C(=NH2+))C2C#N)(C#N)C#N)c3ccc(c(c3)OC)OCCC    |
| ZINC03772287 | 7.48  | 2.02              | -11.03           | 0        | 4           | 0      | 505.618         | 3              | CCn1ccc(c2c1ccc2)/C=C/3\c(=O)n4c(=NC5=C(C@H)4c6cccc(c6)F)CCc7c5cccc7)s3           |
| ZINC08441931 | 4.04  | 3.33              | -63.65           | 2        | 7           | 1      | 432.548         | 7              | [H]/N=C1\1/C(C@H)1(C2=C(C)NH+)(C(C@H)2[C@H](C1(C#N)C#N)c3ccc(c(c3)OC)OCCC)C(C)C#N |
| ZINC08441931 | 4.04  | 3.16              | -113.57          | 3        | 7           | 2      | 433.556         | 7              | CCCCOC1ccc(cc1OC)[C@H]2[C@H]3C(NH+)(CC=C3[C@H](C1(=NH2+))C2(C#N)C#N)C#N)C         |
| ZINC03772289 | 7.48  | 2.14              | -14.26           | 0        | 4           | 0      | 505.618         | 3              | CCn1ccc(c2c1ccc2)/C=C/3\c(=O)n4c(=NC5=C(C@H)4c6cccc(c6)F)CCc7c5cccc7)s3           |
| ZINC08441930 | 4.04  | 8.18              | -12              | 1        | 7           | 0      | 431.54          | 7              | [H]/N=C1\1/C(C@H)1(C2=CCN(C(C@H)2[C@H](C1(C#N)C#N)c3ccc(c(c3)OC)OCCC)C(C)C#N      |
| ZINC08441930 | 4.04  | 2.98              | -117.83          | 3        | 7           | 2      | 433.556         | 7              | CCCCOC1ccc(cc1OC)[C@H]2[C@H]3C(NH+)(CC=C3[C@H](C1(=NH2+))C2(C#N)C#N)C#N)C         |
| ZINC08441929 | 9.38  | 2.43              | -13.92           | 0        | 4           | 0      | 602.134         | 4              | c1ccc2c(c1)CCC3=C2N=C4n(c=O)/c(=C)\c5cccc5OC6cccc6P/s4][C@H]3c8cccc(c8)F          |
| ZINC08441928 | 4.04  | 3.1               | -63.62           | 2        | 7           | 1      | 432.548         | 7              | [H]/N=C1\1/C(C@H)1(C2=CCN(C(C@H)2[C@H](C1(C#N)C#N)c3ccc(c(c3)OC)OCCC)C(C)C#N      |
| ZINC08441928 | 4.04  | 2.93              | -119.74          | 3        | 7           | 2      | 433.556         | 7              | CCCCOC1ccc(cc1OC)[C@H]2[C@H]3C(NH+)(CC=C3[C@H](C1(=NH2+))C2(C#N)C#N)C#N)C         |
| ZINC08441927 | 9.38  | 2.37              | -16.28           | 0        | 4           | 0      | 602.134         | 4              | c1ccc2c(c1)CCC3=C2N=C4n(c=O)/c(=C)\c5cccc5OC6cccc6P/s4][C@H]3c8cccc(c8)F          |
| ZINC08441926 | 4.04  | 3.61              | -63.5            | 2        | 7           | 1      | 432.548         | 7              | [H]/N=C1\1/C(C@H)1(C2=CCN(C(C@H)2[C@H](C1(C#N)C#N)c3ccc(c(c3)OC)OCCC)C(C)C#N      |
| ZINC08441926 | 4.04  | 3.44              | -111.87          | 3        | 7           | 2      | 433.556         | 7              | CCCCOC1ccc(cc1OC)[C@H]2[C@H]3C(NH+)(CC=C3[C@H](C1(=NH2+))C2(C#N)C#N)C#N)C         |
| ZINC08441925 | 8.84  | 1.89              | -13.36           | 0        | 5           | 0      | 559.735         | 7              | CCCCn1ccc(c2c1ccc2)/C=C/3\c(=O)n4c(=NC5=C(C@H)4c6cccc(c6)O)CCc7c5cccc7)s3         |
| ZINC08441924 | 4.84  | 10.32             | -9.29            | 2        | 5           | 0      | 439.95          | 4              | c1ccc(cc1)CCN2CC=C2[C@H](C2)[C@H](C(C=C3C#N)N)(C#N)C#N)c4ccc(cc4)Cl               |
| ZINC08441924 | 4.92  | 2.33              | -127.32          | 3        | 5           | 2      | 441.966         | 4              | c1ccc(cc1)C(C)NH+2CC=C3[C@H](C2)[C@H](C(C=C1)C(=NH2+))C2C#N)(C#N)C#N)c4ccc(cc4)Cl |
| ZINC06195024 | 2.85  | 6.32              | -14.1            | 2        | 9           | 0      | 433.468         | 5              | CCOC(=O)N1CC=C2[C@H](C1)[C@H](C(C=C2C#N)N)(C#N)C#N)c3ccc(cc3)OC                   |
| ZINC06195024 | 2.94  | 1.82              | -47.83           | 2        | 9           | 1      | 434.476         | 5              | CCOC(=O)N1CC=C2[C@H](C1)[C@H](C(C=C1)C(=NH2+))C2C#N)(C#N)C#N)c3ccc(cc3)OC         |
| ZINC08441923 | 8.84  | 1.92              | -13.2            | 0        | 5           | 0      | 559.735         | 7              | CCCCn1ccc(c2c1ccc2)/C=C/3\c(=O)n4c(=NC5=C(C@H)4c6cccc(c6)O)CCc7c5cccc7)s3         |
| ZINC08441922 | 4.28  | 2.73              | -16.94           | 1        | 9           | 0      | 523.593         | 7              | [H]/N=C1\1/C(C@H)1(C2=CCN(C(C@H)2[C@H](C1(C#N)C#N)c3ccc(c(c3)OC)OCCC)C(C)C#N      |
| ZINC08441922 | 4.28  | 2.55              | -50.9            | 2        | 9           | 1      | 524.601         | 7              | CC(C)Oc1ccc(cc1OC)[C@H]2[C@H]3C(NH+)(CC=C3[C@H](C1(=NH2+))C2(C#N)C#N)C#N)C        |
| ZINC00631600 | 4.47  | -1.91             | -19.04           | 0        | 5           | 0      | 433.327         | 3              | Cc1ccc(c(c1)Br)c2ccc(o2)/C=C/3\c(=O)n4c(=NC5=C(C@H)4c6cccc(c6)O)CCc7c5cccc7)s3    |
| ZINC08441919 | 7.45  | 3.9               | -15.57           | 0        | 4           | 0      | 623.483         | 4              | c1ccc2c(c1)CCC3=C2N=C4n(c=O)/c(=C)\c5cccc5OC6cccc6P/s4][C@H]3c7cccc(c7)Cl         |
| ZINC08441920 | 3.51  | 9.83              | -12.42           | 2        | 8           | 0      | 453.502         | 4              | CCOC(=O)N1CC=C2[C@H](C1)[C@H](C(C=C2C#N)N)(C#N)C#N)c3c4cccc4ccc3OC                |
| ZINC08441920 | 3.59  | 2.5               | -43.38           | 2        | 8           | 1      | 454.51          | 4              | CCOC(=O)N1CC=C2[C@H](C1)[C@H](C(C=C1)C(=NH2+))C2C#N)(C#N)C#N)c3c4cccc4ccc3OC      |
| ZINC08441918 | 7.45  | 3.77              | -14.93           | 0        | 4           | 0      | 623.483         | 4              | c1ccc2c(c1)CCC3=C2N=C4n(c=O)/c(=C)\c5cccc5OC6cccc6P/s4][C@H]3c7cccc(c7)Cl         |
| ZINC08441917 | 4.54  | 11.6              | -9.84            | 1        | 6           | 0      | 471.564         | 4              | [H]/N=C1\1/C(C@H)1(C2=CCN(C(C@H)2[C@H](C1(C#N)C#N)c3c4cccc4ccc3OC)C5cccc5)C#N     |
| ZINC08441917 | 4.54  | 3.05              | -112.04          | 3        | 6           | 2      | 473.58          | 4              | COc1ccc2ccc2c1[C@H]3[C@H]4C(NH+)(CC=C4[C@H](C1(=NH2+))C3(C#N)C#N)C#N)c5cccc5      |
| ZINC08441916 | 8.19  | 1.27              | -11.17           | 0        | 3           | 0      | 507.417         | 2              | c1ccc2c(c1)CCC3=C2N=C4n(c=O)/c(=C)\c5cccc5F/s4][C@H]3c6cccc(c6)Cl                 |
| ZINC08441915 | 3.94  | 9.06              | -7.97            | 2        | 6           | 0      | 423.52          | 4              | CCCN1CC=C2[C@H](C1)[C@H](C(C=C2C#N)N)(C#N)C#N)c3c4cccc4ccc3OC                     |
| ZINC08441915 | 4.02  | 3.11              | -109.39          | 3        | 6           | 2      | 425.536         | 4              | CC(C)NH+1CC=C2[C@H](C1)[C@H](C(C=C1)C(=NH2+))C2C#N)(C#N)C#N)c3c4cccc4ccc3OC       |
| ZINC08441914 | 8.19  | 1.25              | -11.35           | 0        | 3           | 0      | 507.417         | 2              | c1ccc2c(c1)CCC3=C2N=C4n(c=O)/c(=C)\c5cccc5F/s4][C@H]3c6cccc(c6)Cl                 |
| ZINC08441913 | 3.73  | 8.82              | -7.87            | 2        | 6           | 0      | 423.52          | 4              | CC(C)NH+1CC=C2[C@H](C1)[C@H](C(C=C2C#N)N)(C#N)C#N)c3c4cccc4ccc3OC                 |
| ZINC08441913 | 3.82  | 10.14             | -104.97          | 3        | 6           | 2      | 425.536         | 3              | CC(C)NH+1CC=C2[C@H](C1)[C@H](C(C=C1)C(=NH2+))C2C#N)(C#N)C#N)c3c4cccc4ccc3OC       |
| ZINC06446299 | 2.1   | 8.97              | -13.66           | 2        | 8           | 0      | 436.475         | 4              | c1ccc(cc1)COC(=O)N2CC=C3[C@H](C2)[C@H](C(C=C3C#N)N)(C#N)C#N)c4cccc4               |
| ZINC08441912 | 9.06  | -0.14             | -6.93            | 0        | 3           | 0      | 615.323         | 2              | c1ccc2c(c1)CCC3=C2N=C4n(c=O)/c(=C)\c5cccc5/s4][C@H]3c6cccc(c6)Cl                  |
| ZINC08441911 | 4.49  | 11.25             | -12.44           | 2        | 7           | 0      | 469.932         | 4              | c1ccc(cc1)COC(=O)N2CC=C3[C@H](C2)[C@H](C(C=C3C#N)N)(C#N)C#N)c4cccc4               |

Supplementary Table S2:

Detailed table of XP Docking using Schrodinger's Glide module

| ZINC_ID      | xLogP | ApolarDesolvation | PolarDesolvation | H Donors | H Acceptors | Charge | MolecularWeight | RotatableBonds | SMILES                                                                               |
|--------------|-------|-------------------|------------------|----------|-------------|--------|-----------------|----------------|--------------------------------------------------------------------------------------|
| ZINC08441911 | 4.57  | 1.76              | -49.47           | 2        | 7           | 1      | 470.94          | 4              | c1ccc(cc1)COC(=O)N2CC=C3[C@@H](C2)[C@@H](C(C(=O)NH2+))C3C#N(C#N)C#N)c4ccc(cc4)Cl     |
| ZINC08441910 | 9.06  | -0.32             | -8.52            | 0        | 3           | 0      | 615.323         | 2              | c1ccc2c(c1)CCC3=C2N=C4n(c(=O)/c(=C)c5cccc51)/s4[C@@H]3c6ccc(cc6)Cl                   |
| ZINC08441909 | 3.95  | 10.11             | -23.97           | 1        | 8           | 0      | 465.513         | 5              | [H]/N=C1/[C@@H](C2=CCN(C[C@@H]2[C@@H](C1(C#N)C#N)c3ccc(cc3)OC)C(=O)OCc4cccc4)C#N     |
| ZINC08441909 | 3.95  | 1.93              | -49.12           | 2        | 8           | 1      | 466.521         | 5              | COC1ccc(cc1)[C@@H]2[C@@H]3CN(CC=C3[C@@H](C(=O)NH2+))C2(C#N)C#N)C(=O)OCc4cccc4        |
| ZINC08441908 | 8.2   | 1.87              | -13.73           | 0        | 5           | 0      | 547.463         | 4              | COC(=O)c1ccc(cc1)/C=C2/C(=O)N3C(=NC4=C1[C@@H]3c5ccc(cc5)C1)CCc6c4cccc6)s2            |
| ZINC0882048  | 5.3   | -1.83             | -21.98           | 2        | 6           | 0      | 445.544         | 6              | Cc1cc(c2c(c1)nc(o2)c3cccc(c3)NC(=S)NC(=O)c4ccc(cc4)OC)C                              |
| ZINC0882039  | 5.17  | -2.29             | -28.86           | 2        | 5           | 0      | 433.558         | 6              | Cc1ccc(cc1)NC(=S)NC(=O)c2ccc(cc2)OC)c3nc4cccc4s3                                     |
| ZINC0882033  | 4.18  | -3.07             | -28.37           | 2        | 7           | 0      | 433.489         | 7              | COC1ccc(cc1)c2nc3ccc(cc3)2)NC(=S)NC(=O)c4ccc(cc4)OC                                  |
| ZINC08441906 | 8.2   | 1.9               | -14.94           | 0        | 5           | 0      | 547.463         | 4              | COC(=O)c1ccc(cc1)/C=C2/C(=O)N3C(=NC4=C1[C@@H]3c5ccc(cc5)C1)CCc6c4cccc6)s2            |
| ZINC08441905 | 4.75  | 11.12             | -16.79           | 1        | 7           | 0      | 493.611         | 8              | [H]/N=C1/[C@@H](C2=CCN(C[C@@H]2[C@@H](C1(C#N)C#N)c3ccc(cc3)OC)OC)CCc4cccc4)C#N       |
| ZINC08441905 | 4.75  | 2.99              | -126.02          | 3        | 7           | 2      | 495.627         | 8              | CCOC1ccc(cc1OCC)[C@@H]2[C@@H]3C[NH+][CC=C3[C@@H](C(=O)NH2+)]C2(C#N)C#N)C#N)C4cccc4   |
| ZINC0882026  | 4.61  | -1.6              | -16.56           | 2        | 5           | 0      | 448.367         | 6              | COC1ccc(cc1)C(=O)NC(=S)Nc2nc(cs2)c3ccc(cc3)Br                                        |
| ZINC02064406 | 4.15  | -1.35             | -32.37           | 2        | 9           | 0      | 466.45          | 7              | COC1ccc(cc1[N+](=O)[O-])[C(=O)NC(=S)Nc2ccc3c(c2)nc(o3)c4cccc4F                       |
| ZINC02064405 | 4.64  | -2.19             | -33.83           | 2        | 9           | 0      | 482.905         | 7              | COC1ccc(cc1[N+](=O)[O-])[C(=O)NC(=S)Nc2ccc3c(c2)nc(o3)c4cccc4Cl                      |
| ZINC02064404 | 4.13  | -1.42             | -40.52           | 2        | 9           | 0      | 466.45          | 7              | COC1ccc(cc1[N+](=O)[O-])[C(=O)NC(=S)Nc2ccc3c(c2)nc(o3)c4cccc4F                       |
| ZINC08441904 | 4.25  | 10.32             | -16.91           | 1        | 7           | 0      | 479.584         | 7              | [H]/N=C1/[C@@H](C2=CCN(C[C@@H]2[C@@H](C1(C#N)C#N)c3ccc(cc3)OC)OC)CCc4cccc4)C#N       |
| ZINC08441904 | 4.25  | 2.92              | -126.04          | 3        | 7           | 2      | 481.6           | 7              | CCOC1ccc(cc1OCC)[C@@H]2[C@@H]3C[NH+][CC=C3[C@@H](C(=O)NH2+)]C2(C#N)C#N)C#N)C4cccc4   |
| ZINC08441903 | 9.96  | 1.87              | -13.23           | 0        | 4           | 0      | 636.579         | 4              | c1ccc2c(c1)CCC3=C2N=C4n(c(=O)/c(=C)c5cn(cc6c5ccc6)C7c8cccc7F)/s4[C@@H]3c8ccc(cc8)Cl  |
| ZINC0881990  | 2.95  | -0.44             | -28.27           | 2        | 7           | 0      | 438.303         | 6              | Cc1ccc(cc1)NC(=S)NC(=O)c2ccc(cc2)[N+](=O)[O-]OC)Br                                   |
| ZINC02064400 | 3.59  | -0.82             | -32.9            | 3        | 9           | 0      | 464.503         | 8              | Cc1cccc(c1)C(=O)Nc2ccc(c2)NC(=S)NC(=O)c3ccc(cc3)[N+](=O)[O-]OC                       |
| ZINC02064399 | 4.84  | -1.49             | -35.72           | 2        | 9           | 0      | 476.514         | 7              | Cc1cc2c(c1)oc(n2)c3ccc(cc3)NC(=S)NC(=O)c4ccc(cc4)[N+](=O)[O-]OC                      |
| ZINC08441902 | 4.02  | 8.82              | -17.78           | 1        | 7           | 0      | 445.567         | 7              | [H]/N=C1/[C@@H](C2=CCN(C[C@@H]2[C@@H](C1(C#N)C#N)c3ccc(cc3)OC)OC)CCc4cccc4)C#N       |
| ZINC08441902 | 4.02  | 2.88              | -118.65          | 3        | 7           | 2      | 447.583         | 7              | CCOC1ccc(cc1OCC)[C@@H]2[C@@H]3C[NH+][CC=C3[C@@H](C(=O)NH2+)]C2(C#N)C#N)C#N)C4cccc4   |
| ZINC08441901 | 9.96  | 1.65              | -12.45           | 0        | 4           | 0      | 636.579         | 4              | c1ccc2c(c1)CCC3=C2N=C4n(c(=O)/c(=C)c5cn(cc6c5ccc6)C7c8cccc7F)/s4[C@@H]3c8ccc(cc8)Cl  |
| ZINC02064398 | 4.93  | -1.62             | -35.24           | 2        | 9           | 0      | 476.514         | 8              | Cc1ccc2c(c1)nc(o2)c3ccc(cc3)NC(=S)NC(=O)c4ccc(cc4)[N+](=O)[O-]OC                     |
| ZINC02064397 | 4.46  | -1.78             | -35.57           | 2        | 9           | 0      | 462.487         | 7              | Cc1ccc2c(c1)nc(o2)c3ccc(cc3)NC(=S)NC(=O)c4ccc(cc4)[N+](=O)[O-]OC                     |
| ZINC02064396 | 4.04  | -2.1              | -37.08           | 2        | 9           | 0      | 448.46          | 7              | COC1ccc(cc1[N+](=O)[O-])[C(=O)NC(=S)Nc2ccc(cc2)c3nc4cccc4o3                          |
| ZINC02064395 | 4.69  | -2.25             | -33.64           | 2        | 9           | 0      | 482.905         | 7              | COC1ccc(cc1[N+](=O)[O-])[C(=O)NC(=S)Nc2ccc(cc2)c3nc4cccc4o3                          |
| ZINC08441900 | 4.09  | 3.3               | -66.2            | 2        | 7           | 1      | 446.575         | 7              | [H]/N=C1/[C@@H](C2=C(C(=O)NH+))C(C@@H]2[C@@H](C1(C#N)C#N)c3ccc(cc3)OC)OC(C)C)C)C)C#N |
| ZINC08441900 | 4.09  | 3.13              | -119.92          | 3        | 7           | 2      | 447.583         | 7              | CC(C)NH+1CC=C2[C@@H](C1)[C@@H](C(C(=O)NH2+))C2(C#N)C#N)C#N)c3ccc(cc3)OC)OC(C)C       |
| ZINC03770143 | 9.63  | 1.02              | -13.19           | 0        | 4           | 0      | 595.551         | 5              | c1ccc(c1)COC2c3ccc2/C=C3/C(=O)N4C(=NC5=C1[C@@H]4c6ccc(cc6)C1)CCc7c5cccc7)s3          |
| ZINC02064394 | 4.68  | -1.81             | -34.88           | 2        | 8           | 0      | 464.528         | 7              | COC1ccc(cc1[N+](=O)[O-])[C(=O)NC(=S)Nc2ccc(cc2)c3nc4cccc4s3                          |
| ZINC01849163 | 5.19  | -0.88             | -32.46           | 2        | 9           | 0      | 490.541         | 7              | Cc1cc(c2c(c1)nc(o2)c3ccc(cc3)NC(=S)NC(=O)c4ccc(cc4)[N+](=O)[O-]OC)C                  |
| ZINC08441899 | 3.59  | 2.98              | -61.66           | 2        | 7           | 1      | 432.548         | 6              | [H]/N=C1/[C@@H](C2=C(C(=O)NH+))C(C@@H]2[C@@H](C1(C#N)C#N)c3ccc(cc3)OC)OC(C)C)C)C#N   |
| ZINC08441899 | 3.59  | 2.81              | -118.19          | 3        | 7           | 2      | 433.556         | 6              | CC(NH+1)CC=C2[C@@H](C1)[C@@H](C(C(=O)NH2+))C2(C#N)C#N)C#N)c3ccc(cc3)OC)OC(C)C        |
| ZINC03770145 | 9.63  | 1                 | -12.94           | 0        | 4           | 0      | 595.551         | 5              | c1ccc(c1)COC2c3ccc2/C=C3/C(=O)N4C(=NC5=C1[C@@H]4c6ccc(cc6)C1)CCc7c5cccc7)s3          |
| ZINC02064392 | 5.3   | -1.09             | -38.59           | 2        | 9           | 0      | 490.541         | 8              | CCOC1ccc(cc1)nc(o2)c3ccc(cc3)NC(=S)NC(=O)c4ccc(cc4)[N+](=O)[O-]OC)C                  |
| ZINC02064391 | 4.9   | -1.62             | -39.02           | 2        | 9           | 0      | 476.514         | 8              | CCOC1ccc(cc1)nc(o2)c3ccc(cc3)NC(=S)NC(=O)c4ccc(cc4)[N+](=O)[O-]OC                    |
| ZINC02064389 | 4.64  | -2.12             | -33.7            | 2        | 9           | 0      | 482.905         | 7              | COC1ccc(cc1[N+](=O)[O-])[C(=O)NC(=S)Nc2ccc(cc2)c3nc4cccc4o3                          |
| ZINC08441898 | 4.38  | 2.81              | -15.29           | 1        | 9           | 0      | 503.603         | 8              | [H]/N=C1/[C@@H](C2=CCN(C[C@@H]2[C@@H](C1(C#N)C#N)c3ccc(cc3)OC)OC)C(=O)OC(C)C)C#N     |
| ZINC08441898 | 4.38  | 2.63              | -49.21           | 2        | 9           | 1      | 504.611         | 8              | CCOC1ccc(cc1OCC)[C@@H]2[C@@H]3CN(CC=C3[C@@H](C(=O)NH2+)]C2(C#N)C#N)C#N)C4cccc4       |
| ZINC02064388 | 5.04  | -2.03             | -32.98           | 2        | 9           | 0      | 496.932         | 7              | Cc1c(cccc1)NC(=S)NC(=O)c2ccc(cc2)[N+](=O)[O-]OC)c3nc4ccc(cc4)3)Cl                    |
| ZINC08441897 | 9.2   | -0.16             | -11.37           | 0        | 4           | 0      | 612.376         | 4              | CCOC1ccc(cc1)Br)/C=C2/C(=O)N3C(=NC4=C1[C@@H]3c5ccc(cc5)C1)CCc6c4cccc6)s2             |
| ZINC02064387 | 5.05  | -1.31             | -39.14           | 2        | 8           | 0      | 478.555         | 7              | Cc1ccc(cc1)NC(=S)NC(=O)c2ccc(cc2)[N+](=O)[O-]OC)c3nc4cccc4s3                         |
| ZINC02064386 | 4.65  | -1.8              | -39.86           | 2        | 8           | 0      | 464.528         | 7              | COC1ccc(cc1[N+](=O)[O-])[C(=O)NC(=S)Nc2ccc(cc2)c3nc4cccc4s3                          |
| ZINC08441896 | 3.8   | 9.76              | -17.42           | 1        | 9           | 0      | 475.549         | 8              | [H]/N=C1/[C@@H](C2=CCN(C[C@@H]2[C@@H](C1(C#N)C#N)c3ccc(cc3)OC)OC)C(=O)OC)C)C)C#N     |
| ZINC08441896 | 3.8   | 2.21              | -50.43           | 2        | 9           | 1      | 476.557         | 8              | CCOC1ccc(cc1OCC)[C@@H]2[C@@H]3CN(CC=C3[C@@H](C(=O)NH2+)]C2(C#N)C#N)C#N)C4cccc4       |
| ZINC08441895 | 9.2   | 0.04              | -9.85            | 0        | 4           | 0      | 612.376         | 4              | CCOC1ccc(cc1)Br)/C=C2/C(=O)N3C(=NC4=C1[C@@H]3c5ccc(cc5)C1)CCc6c4cccc6)s2             |
| ZINC08441894 | 3.49  | -2.21             | -35.34           | 2        | 10          | 0      | 463.475         | 7              | Cc1c(cccc1)NC(=S)NC(=O)c2ccc(cc2)[N+](=O)[O-]OC)c3nc4c(o3)cccc4                      |
| ZINC08441893 | 3.51  | -2.25             | -45.39           | 2        | 10          | 0      | 463.475         | 7              | Cc1ccc(cc1)NC(=S)NC(=O)c2ccc(cc2)[N+](=O)[O-]OC)c3nc4c(o3)cccc4                      |
| ZINC02064384 | 4.46  | -1.79             | -39.23           | 2        | 9           | 0      | 462.487         | 7              | Cc1ccc(cc1)c2nc3ccc(cc3)2)NC(=S)NC(=O)c4ccc(cc4)[N+](=O)[O-]OC                       |
| ZINC08441892 | 4.14  | 8.9               | -10.18           | 2        | 7           | 0      | 445.567         | 8              | CCCN1CC=C2[C@@H](C1)[C@@H](C(C(=O)NH2+))C2(C#N)C#N)c3ccc(cc3)OC)OC)C                 |
| ZINC08441892 | 4.23  | 2.92              | -119.63          | 3        | 7           | 2      | 447.583         | 8              | CC(C)NH+1CC=C2[C@@H](C1)[C@@H](C(C(=O)NH2+))C2(C#N)C#N)C#N)c3ccc(cc3)OC)OC)C         |
| ZINC02064383 | 4.41  | -2.09             | -39.89           | 2        | 9           | 0      | 462.487         | 7              | Cc1cccc(c1)c2nc3ccc(cc3)2)NC(=S)NC(=O)c4ccc(cc4)[N+](=O)[O-]OC                       |
| ZINC08441891 | 9.02  | -1.46             | -10.4            | 1        | 4           | 0      | 574.316         | 2              | c1ccc2c(c1)CCC3=C2N=C4n(c(=O)/c(=C)c5ccc(cc5)C1)Cl)C@H]3c6ccc(cc6)Cl                 |
| ZINC02064382 | 4.18  | -1.37             | -31.61           | 2        | 9           | 0      | 466.45          | 7              | COC1ccc(cc1[N+](=O)[O-])[C(=O)NC(=S)Nc2ccc3c(c2)nc(o3)c4cccc4F                       |
| ZINC08441890 | 5.93  | 3.61              | -11.93           | 1        | 6           | 0      | 458.606         | 7              | [H]/N=C1/[C@@H](C2=CC(C[C@@H]2[C@@H](C1(C#N)C#N)c3ccc(cc3)OC)OC)CC(C)C)C)C#N         |
| ZINC08441890 | 5.93  | 3.43              | -42.34           | 2        | 6           | 1      | 459.614         | 7              | CCOC1ccc(cc1OCC)[C@@H]2[C@@H]3C[NH+][CC=C3[C@@H](C(=O)NH2+)]C2(C#N)C#N)C#N)C4cccc4   |
| ZINC02064381 | 3.69  | 10.98             | -27.19           | 2        | 8           | 0      | 414.468         | 7              | COC1ccc(cc1[N+](=O)[O-])[C(=O)NC(=S)Nc2nc(cs2)c3cccc3                                |
| ZINC02064380 | 4.5   | 11.6              | -26.68           | 2        | 8           | 0      | 493.364         | 7              | COC1ccc(cc1[N+](=O)[O-])[C(=O)NC(=S)Nc2nc(cs2)c3ccc(cc3)Br                           |
| ZINC08441889 | 9.02  | -1.62             | -9.87            | 1        | 4           | 0      | 574.316         | 2              | c1ccc2c(c1)CCC3=C2N=C4n(c(=O)/c(=C)c5ccc(cc5)C1)Cl)C@H]3c6ccc(cc6)Cl                 |

Supplementary Table S2:

Detailed table of XP Docking using Schrodinger's Glide module

| ZINC_ID      | sLogP | ApolarDesolvation | PolarDesolvation | H Donors | H Acceptors | Charge | MolecularWeight | RotatableBonds | SMILES                                                                          |
|--------------|-------|-------------------|------------------|----------|-------------|--------|-----------------|----------------|---------------------------------------------------------------------------------|
| ZINC01876223 | 3.43  | 0.37              | -38.72           | 2        | 11          | 0      | 492.517         | 8              | Cc1cc2c(c1)NC(=S)NC(=O)c3ccc(c(c3)N+)[(=O)]O)C)nn(n2)ec4ccc(c4)OC               |
| ZINC01860012 | 3.82  | 0.67              | -38.74           | 2        | 10          | 0      | 476.518         | 7              | Cc1ccc(cc1)n2n3ccc(c(c3n2)NC(=S)NC(=O)c4ccc(c(c4)N+)[(=O)]O)OC                  |
| ZINC01824016 | 3.43  | -0.13             | -38.88           | 2        | 11          | 0      | 492.517         | 9              | CCOc1ccc(cc1)n2n3ccc(c(c3n2)NC(=S)NC(=O)c4ccc(c(c4)N+)[(=O)]O)OC                |
| ZINC08441888 | 8.06  | -1.15             | -11.76           | 0        | 5           | 0      | 547.724         | 5              | CCOc1ccc(cc1)[C@H]2C3=C(c4cccc4CC3)N=c5n2c(=O)/c(=C)c6ccc(cc6C)N7CCCC7/s5       |
| ZINC02064379 | 3.44  | 0.16              | -39.58           | 2        | 10          | 0      | 462.491         | 7              | Cc1ccc(cc1)n2n3ccc(c(c3n2)NC(=S)NC(=O)c4ccc(c(c4)N+)[(=O)]O)OC                  |
| ZINC13161518 | 5.93  | 11.39             | -18.6            | 1        | 6           | 0      | 458.606         | 7              | [H]/N=C/1/[C@H](C2=CC[C@H](C[C@H]2)[C@H](C1(C#N)C#N)c3ccc(c(c3)OC)OC)C(C)(C)C#N |
| ZINC02064378 | 2.99  | -0.17             | -39.95           | 2        | 10          | 0      | 448.464         | 7              | COC1ccc(cc1N+)[(=O)]O-]C(=O)NC(=S)Nc2ccc3c(c2)nn(n3)c4cccc4                     |
| ZINC0881982  | 3.04  | -0.95             | -32.57           | 2        | 8           | 0      | 411.237         | 6              | COC1ccc(cc1N+)[(=O)]O-]C(=O)NC(=S)Nc2ccc(c2)Br                                  |
| ZINC08441886 | 8.06  | -1.16             | -11.96           | 0        | 5           | 0      | 547.724         | 5              | CCOc1ccc(cc1)[C@H]2C3=C(c4cccc4CC3)N=c5n2c(=O)/c(=C)c6ccc(cc6C)N7CCCC7/s5       |
| ZINC08441885 | 5.43  | 3.53              | -11.65           | 1        | 6           | 0      | 444.579         | 6              | [H]/N=C/1/[C@H](C2=CC[C@H](C[C@H]2)[C@H](C1(C#N)C#N)c3ccc(c(c3)OC)OC)C(C)(C)C#N |
| ZINC08441885 | 5.43  | 3.34              | -42.75           | 2        | 6           | 1      | 445.587         | 6              | CCOc1ccc(cc1OC)[C@H]2[C@H]3[C@H](CC=C3[C@H](C(=NH2+))C2(C#N)C#N)C#N)C(C)C       |
| ZINC0881954  | 4.31  | -1.89             | -24.98           | 3        | 6           | 0      | 453.951         | 7              | Cc1cccc1C(=O)Nc2ccc(c2)NC(=S)NC(=O)c3ccc(c(c3)C)OC                              |
| ZINC08441884 | 8.21  | 0.02              | -9.2             | 0        | 4           | 0      | 590.486         | 4              | CCOc1ccc(cc1)[C@H]2C3=C(c4cccc4CC3)N=c5n2c(=O)/c(=C)c6cccc61/s5                 |
| ZINC0881949  | 4.75  | -3.18             | -28.71           | 2        | 6           | 0      | 437.908         | 6              | COC1ccc(cc1C)C(=O)NC(=S)Nc2ccc(c2)c3nc4cccc4o3                                  |
| ZINC08441883 | 5.43  | 3.84              | -13.15           | 1        | 6           | 0      | 444.579         | 6              | [H]/N=C/1/[C@H](C2=CC[C@H](C[C@H]2)[C@H](C1(C#N)C#N)c3ccc(c(c3)OC)OC)C(C)(C)C#N |
| ZINC08441883 | 5.43  | 3.67              | -9.7             | 2        | 6           | 1      | 445.587         | 6              | CCOc1ccc(cc1OC)[C@H]2[C@H]3[C@H](CC=C3[C@H](C(=NH2+))C2(C#N)C#N)C#N)C(C)C       |
| ZINC08441882 | 8.21  | 0                 | -9.55            | 0        | 4           | 0      | 590.486         | 4              | [H]/N=C/1/[C@H](C2=CC[C@H](C[C@H]2)[C@H](C1(C#N)C#N)c3ccc(c(c3)OC)OC)C(C)(C)C#N |
| ZINC0881937  | 4.73  | -3.18             | -25.42           | 2        | 6           | 0      | 437.908         | 6              | COC1ccc(cc1C)C(=O)NC(=S)Nc2ccc(c2)c3nc4cccc4o3                                  |
| ZINC00971829 | 4.23  | -3.33             | -37.12           | 2        | 7           | 0      | 452.923         | 6              | C1ccc(cc1NC(=S)NC(=O)c2ccc(c2)C)OCc3nc4o3)ccn4                                  |
| ZINC02064376 | 4.22  | -0.82             | -23.88           | 2        | 6           | 0      | 451.342         | 9              | CCOC(C=O)c1ccc(cc1)NC(=S)NC(=O)c2ccc(c2)Br)OC                                   |
| ZINC0881919  | 3.72  | -0.89             | -24.14           | 2        | 6           | 0      | 437.315         | 8              | CCOC(C=O)c1ccc(cc1)NC(=S)NC(=O)c2ccc(c2)Br)OC                                   |
| ZINC0881917  | 3.35  | -0.86             | -24.3            | 2        | 6           | 0      | 423.288         | 7              | COC1ccc(cc1Br)C(=O)NC(=S)Nc2ccc(c2)C(=O)OC                                      |
| ZINC01126045 | 4.59  | 5.81              | -8.44            | 3        | 6           | 0      | 446.616         | 5              | c1ccc(c1)OCc2ccc2[C@H]3c4c([nH]nc4OC(=C3C#N)N)C(F)F)Cl                          |
| ZINC08441880 | 4.81  | -2.62             | -6.03            | 2        | 4           | 0      | 458.164         | 4              | [H]/N=C/1/[C@H](C2=CC[C@H](C[C@H]2)[C@H](C1(C#N)C#N)c3ccc(c(c3)OC)OC)C(C)(C)C#N |
| ZINC0881904  | 4.03  | -1.47             | -22.22           | 2        | 5           | 0      | 436.375         | 8              | CCN(C)C1ccc(cc1)NC(=S)NC(=O)c2ccc(c2)Br)OC                                      |
| ZINC0881890  | 2.82  | -1.66             | -24.4            | 2        | 6           | 0      | 425.304         | 7              | COC1ccc(cc1OC)NC(=S)NC(=O)c2ccc(c2)Br)OC                                        |
| ZINC01126049 | 4.59  | 5.81              | -8.41            | 3        | 6           | 0      | 446.616         | 5              | c1ccc(c1)OCc2ccc2[C@H]3c4c([nH]nc4OC(=C3C#N)N)C(F)F)Cl                          |
| ZINC0881866  | 3.21  | -3.02             | -27.58           | 3        | 6           | 0      | 436.331         | 7              | CC(C=O)Nc1ccc(c1)NC(=S)NC(=O)c2ccc(c2)Br)OC                                     |
| ZINC02890864 | 2.83  | 3.54              | -21.39           | 2        | 7           | 0      | 430.885         | 9              | COC1ccc(cc1OC)CCN(C(=O)N)S(=O)O)c2ccc(c2)Cl)F                                   |
| ZINC0881863  | 4.04  | -2.75             | -25.76           | 3        | 6           | 0      | 484.375         | 7              | COC1ccc(cc1Br)C(=O)NC(=S)Nc2ccc(c2)NC(=O)c3cccc3                                |
| ZINC00631391 | 3.26  | 13.23             | -21.46           | 0        | 7           | 0      | 461.522         | 4              | c1ccc2c(c1)ccc3n2c(mn3)SC(C(=O)N4CC(C)C4)c5ccc(cc5)F                            |
| ZINC09178123 | 2.92  | 5.36              | -18.92           | 3        | 9           | 0      | 453.543         | 8              | CCN(C)C(=O)COC1ccc(cc1OC)[C@H]2c3c([nH]nc3OC(=C2C#N)N)C(C)C                     |
| ZINC0881856  | 3.99  | -4.45             | -30.37           | 2        | 7           | 0      | 483.347         | 6              | COC1ccc(cc1Br)C(=O)NC(=S)Nc2ccc(c2)c3nc4o3)ccn4                                 |
| ZINC0881853  | 5.24  | -3.16             | -24.46           | 2        | 6           | 0      | 496.386         | 6              | Cc1c(ccc1NC(=S)NC(=O)c2ccc(c2)Br)OCc3nc4ccc4o3                                  |
| ZINC0881851  | 4.86  | -3.76             | -25.41           | 2        | 6           | 0      | 482.359         | 6              | COC1ccc(cc1Br)C(=O)NC(=S)Nc2ccc(c2)c3nc4ccc4o3                                  |
| ZINC09178122 | 2.92  | 5.34              | -18.86           | 3        | 9           | 0      | 453.543         | 8              | CCN(C)C(=O)COC1ccc(cc1OC)[C@H]2c3c([nH]nc3OC(=C2C#N)N)C(C)C                     |
| ZINC01873774 | 5.22  | 3.49              | -51.64           | 2        | 7           | 1      | 440.516         | 10             | CCOC(C=O)c1ccc(cc1)Oc2c(oc3c(c2=O)ccc(c3)N)N+([C]C)OC)C                         |
| ZINC0881847  | 4.34  | -3.84             | -27.07           | 2        | 7           | 0      | 497.374         | 6              | Cc1c(ccc1NC(=S)NC(=O)c2ccc(c2)Br)OCc3nc4o3)ccn4                                 |
| ZINC0881842  | 4.36  | -3.92             | -37.1            | 2        | 7           | 0      | 497.374         | 6              | Cc1c(ccc1NC(=S)NC(=O)c2ccc(c2)Br)OCc3nc4o3)ccn4                                 |
| ZINC0881833  | 3.85  | -2.06             | -24.44           | 2        | 5           | 0      | 456.365         | 7              | COC1ccc(cc1Br)C(=O)NC(=S)Nc2ccc(c2)C3cccc3                                      |
| ZINC08441879 | 3.65  | 7.9               | -17.86           | 1        | 7           | 0      | 431.54          | 6              | [H]/N=C/1/[C@H](C2=CC[C@H](C[C@H]2)[C@H](C1(C#N)C#N)c3ccc(c(c3)OC)OC)C(C)C#N    |
| ZINC08441879 | 3.65  | 2.87              | -118.27          | 3        | 7           | 2      | 433.556         | 6              | CCOC1ccc(cc1OC)[C@H]2[C@H]3[C@H](CC=C3[C@H](C(=NH2+))C2(C#N)C#N)C#N)C(C)C       |
| ZINC0881828  | 4.54  | -1.52             | -19.43           | 2        | 5           | 0      | 448.367         | 6              | COC1ccc(cc1Br)C(=O)NC(=S)Nc2ccc(c2)c3ccc(c3)F                                   |
| ZINC0881812  | 3.84  | -1.58             | -23.31           | 2        | 8           | 0      | 481.505         | 8              | COC1ccc(cc1OC)OC(C(=O)NC(=S)Nc2ccc3c(c2)nc(o3)c4cccc(c4)F                       |
| ZINC0881808  | 4.33  | -2.43             | -24.68           | 2        | 8           | 0      | 497.96          | 8              | COC1ccc(cc1OC)OC(C(=O)NC(=S)Nc2ccc3c(c2)nc(o3)c4cccc(c4)F                       |
| ZINC08441878 | 3.65  | 7.37              | -13.08           | 1        | 7           | 0      | 431.54          | 6              | [H]/N=C/1/[C@H](C2=CC[C@H](C[C@H]2)[C@H](C1(C#N)C#N)c3ccc(c(c3)OC)OC)C(C)C#N    |
| ZINC08441878 | 3.65  | 3.33              | -111.74          | 3        | 7           | 2      | 433.556         | 6              | CCOC1ccc(cc1OC)[C@H]2[C@H]3[C@H](CC=C3[C@H](C(=NH2+))C2(C#N)C#N)C#N)C(C)C       |
| ZINC0881806  | 3.7   | -2.33             | -23.5            | 2        | 8           | 0      | 463.515         | 8              | COC1ccc(cc1OC)OC(C(=O)NC(=S)Nc2ccc3c(c2)nc(o3)c4cccc(c4)F                       |
| ZINC0881739  | 2.88  | -1.3              | -24.82           | 3        | 8           | 0      | 465.531         | 9              | COC1ccc(cc1OC)OC(C(=O)NC(=S)Nc2ccc(c2)NC(=O)c3ccc3                              |
| ZINC08441877 | 2.33  | 1.97              | -18.48           | 1        | 8           | 0      | 431.496         | 5              | [H]/N=C/1/[C@H](C2=CC[C@H](C[C@H]2)[C@H](C1(C#N)C#N)c3ccc(c(c3)OC)OC)C(C)C#N    |
| ZINC08441877 | 2.33  | 1.79              | -52.57           | 2        | 8           | 1      | 432.504         | 5              | CCOC1ccc(cc1OC)[C@H]2[C@H]3[C@H](CC=C3[C@H](C(=NH2+))C2(C#N)C#N)C#N)C(C)C       |
| ZINC0881738  | 3.43  | 5.16              | -27.51           | 3        | 9           | 0      | 479.514         | 8              | COC1ccc(cc1OC)OC(C(=O)NC(=S)Nc2ccc(c2)O)c3nc4cccc4o3                            |
| ZINC08441876 | 4.99  | 3.48              | -58.16           | 2        | 7           | 1      | 460.506         | 8              | Cc1c(c(=O)c2ccc(c2o1)C)N)N+([C]C3cccc3)OCc4ccc(c4)C(=O)OC                       |
| ZINC0881734  | 4.53  | -1.68             | -26.37           | 2        | 8           | 0      | 491.569         | 8              | Cc1c(c2c(c1)nc(o2)c3ccc(cc3)NC(=S)NC(=O)c4ccc(c(c4)OC)OC)OC                     |
| ZINC0881732  | 4.15  | -2                | -26.19           | 2        | 8           | 0      | 477.542         | 8              | Cc1ccc2c(c1)oc(n2)c3ccc(cc3)NC(=S)NC(=O)c4ccc(c(c4)OC)OC)OC                     |
| ZINC08441875 | 2.33  | 7.67              | -17.95           | 1        | 8           | 0      | 431.496         | 5              | [H]/N=C/1/[C@H](C2=CC[C@H](C[C@H]2)[C@H](C1(C#N)C#N)c3ccc(c(c3)OC)OC)C(C)C#N    |
| ZINC08441875 | 2.33  | 1.85              | -47.19           | 2        | 8           | 1      | 432.504         | 5              | CCOC1ccc(cc1OC)[C@H]2[C@H]3[C@H](CC=C3[C@H](C(=NH2+))C2(C#N)C#N)C#N)C(C)C       |
| ZINC0881730  | 4.38  | -2.47             | -24.37           | 2        | 8           | 0      | 497.96          | 8              | COC1ccc(cc1OC)OC(C(=O)NC(=S)Nc2ccc(c2)c3nc4ccc4o3)Cl                            |
| ZINC00631361 | 4.18  | 3.07              | -10.46           | 0        | 7           | 0      | 449.381         | 5              | COC1ccc(cc1)c2c(c1)c3ccc(cc3oc2)C(F)F)OC(=O)N4COCC4                             |
| ZINC0881728  | 4.37  | -2.03             | -25.52           | 2        | 7           | 0      | 479.583         | 8              | COC1ccc(cc1OC)OC(C(=O)NC(=S)Nc2ccc(c2)c3nc4cccc4o3                              |
| ZINC0881726  | 3.71  | -2.2              | -27.48           | 2        | 9           | 0      | 493.541         | 9              | COC1ccc(cc1NC(=S)NC(=O)c2ccc(c2)OC)OC)c3nc4cccc4o3                              |

Supplementary Table S2:

Detailed table of XP Docking using Schrodinger's Glide module

| ZINC_ID      | xLogP | ApolarDesolvation | PolarDesolvation | H Donors | H Acceptors | Charge | MolecularWeight | RotatableBonds | SMILES                                                                                   |
|--------------|-------|-------------------|------------------|----------|-------------|--------|-----------------|----------------|------------------------------------------------------------------------------------------|
| ZINC08441874 | 4.49  | 9.98              | -16.37           | 1        | 9           | 0      | 489.576         | 9              | [H]/N=C/1/[C@@H]([C2=CCN(C)C@H]2)[C@@H]([C1(C#N)C#N]c3ccc(c(c3)OC)OCCCCC)C(=O)OCC)C#N    |
| ZINC08441874 | 4.49  | 2.36              | -47.04           | 2        | 9           | 1      | 490.584         | 9              | CCCCCOC1ccc(cc1OC)[C@@H]2[C@@H]3CN(CC=C3)[C@H]([C]=[NH2+])C2(C#N)C#N)C#N(C=O)OCC         |
| ZINC00881724 | 4.1   | -1.82             | -29.5            | 2        | 8           | 0      | 477.542         | 8              | Cc1ccc(cc1NC(=S)NC(=O)C2=CC(=O)C(C2)OC)OC)C3=CC(=O)C(C3)OC)C                             |
| ZINC00881722 | 4.08  | -1.79             | -24.54           | 2        | 8           | 0      | 477.542         | 8              | Cc1c(ccc1NC(=S)NC(=O)C2=CC(=O)C(C2)OC)OC)C3=CC(=O)C(C3)OC)C                              |
| ZINC08441873 | 4.28  | 0.12              | -18.33           | 1        | 9           | 0      | 498.634         | 12             | CCOC(=O)c1ccc(cc1)NC(=O)CSc2nnc2CC=C)CSc3nc(cc(n3)C)C                                    |
| ZINC00881721 | 4.5   | -1.68             | -31.43           | 2        | 8           | 0      | 491.569         | 8              | Cc1cc(c2c(c1)nc(o2)c3ccc(c3)NC(=S)NC(=O)C4=CC(=O)C(C4)OC)OC)C                            |
| ZINC00881706 | 4.74  | -1.53             | -29.7            | 2        | 7           | 0      | 493.61          | 8              | Cc1ccc(cc1NC(=S)NC(=O)C2=CC(=O)C(C2)OC)OC)C3=CC(=O)C(C3)OC)C                             |
| ZINC00387261 | 2.97  | 9.67              | -16.39           | 1        | 6           | 0      | 332.363         | 2              | Cc1ccc2c1nc3c(c2=O)cc(n3C)C(=O)Nc4cccc4                                                  |
| ZINC08441872 | 4.49  | 10.4              | -17.34           | 1        | 9           | 0      | 489.576         | 9              | [H]/N=C/1/[C@@H]([C2=CCN(C)C@H]2)[C@@H]([C1(C#N)C#N]c3ccc(c(c3)OC)OCCCCC)C(=O)OCC)C#N    |
| ZINC08441872 | 4.49  | 2.44              | -50.24           | 2        | 9           | 1      | 490.584         | 9              | CCCCCOC1ccc(cc1OC)[C@@H]2[C@@H]3CN(CC=C3)[C@H]([C]=[NH2+])C2(C#N)C#N)C#N(C=O)OCC         |
| ZINC00881705 | 4.34  | -2.03             | -23.12           | 2        | 7           | 0      | 479.583         | 8              | COC1cc(ccc1OC)OC)C(=O)NC(=S)Nc2ccc(c2)c3nc4cccc4s3                                       |
| ZINC00631218 | 3.59  | 11.4              | -15.16           | 0        | 6           | 0      | 360.417         | 3              | CCN(c1cccc1)C(=O)C2=CC(=O)C(C2)OC)C3=CC(=O)C(C3)OC)C                                     |
| ZINC00881703 | 3.18  | -2.79             | -29.4            | 2        | 9           | 0      | 478.53          | 8              | Cc1c(ccc1NC(=S)NC(=O)C2=CC(=O)C(C2)OC)OC)C3=CC(=O)C(C3)OC)C                              |
| ZINC00881701 | 3.2   | -2.48             | -35.42           | 2        | 9           | 0      | 478.53          | 8              | Cc1ccc(cc1NC(=S)NC(=O)C2=CC(=O)C(C2)OC)OC)C3=CC(=O)C(C3)OC)C                             |
| ZINC08441871 | 4.49  | 2.61              | -17.47           | 1        | 9           | 0      | 489.576         | 9              | [H]/N=C/1/[C@@H]([C2=CCN(C)C@H]2)[C@@H]([C1(C#N)C#N]c3ccc(c(c3)OC)OCCCCC)C(=O)OCC)C#N    |
| ZINC08441871 | 4.49  | 2.44              | -51.59           | 2        | 9           | 1      | 490.584         | 9              | CCCCCOC1ccc(cc1OC)[C@@H]2[C@@H]3CN(CC=C3)[C@H]([C]=[NH2+])C2(C#N)C#N)C#N(C=O)OCC         |
| ZINC00881699 | 2.8   | -3.01             | -26.99           | 2        | 9           | 0      | 464.503         | 8              | COC1cc(ccc1OC)OC)C(=O)NC(=S)Nc2ccc(c2)c3nc4e(o3)cccc4                                    |
| ZINC00920168 | 3.63  | -2.26             | -22.63           | 2        | 7           | 0      | 463.987         | 8              | COC1cc(ccc1OC)OC)C(=O)NC(=S)Nc2ccc(c2)C1N3CCCC1                                          |
| ZINC08441870 | 3.75  | -5.91             | -19.39           | 2        | 7           | 0      | 453.545         | 6              | Cc1nc2c(cc2s1)NC(=O)C3=CC(=O)C(C3)OC)C4=CC(=O)C(C4)OC                                    |
| ZINC00881692 | 2.57  | -3.67             | -20.8            | 2        | 8           | 0      | 465.959         | 8              | COC1cc(ccc1OC)OC)C(=O)NC(=S)Nc2ccc(c2)C1N3CCCC1                                          |
| ZINC13161517 | 4.49  | 9.99              | -15.97           | 1        | 9           | 0      | 489.576         | 9              | [H]/N=C/1/[C@@H]([C2=CCN(C)C@H]2)[C@@H]([C1(C#N)C#N]c3ccc(c(c3)OC)OCCCCC)C(=O)OCC)C#N    |
| ZINC00881684 | 4.1   | -2.31             | -23.72           | 2        | 8           | 0      | 477.542         | 8              | Cc1cccc1c2nc3cc(c3o2)NC(=S)NC(=O)C4=CC(=O)C(C4)OC)C                                      |
| ZINC08441867 | 1.17  | 3.31              | -19.95           | 3        | 10          | 0      | 441.488         | 9              | CC(C)C(=O)COC1ccc(cc1OC)[C@@H]2c3c([nH]nc3OC=C2C#N)N)COC                                 |
| ZINC00881683 | 4.38  | -2.48             | -22.25           | 2        | 8           | 0      | 497.96          | 8              | COC1cc(ccc1OC)OC)C(=O)NC(=S)Nc2ccc(c2)nc(o3)c4ccc(cc4)Cl                                 |
| ZINC00920166 | 3.51  | 0.45              | -29.1            | 2        | 9           | 0      | 491.573         | 8              | Cc1ccc(cc1)n2nc3cc(c(c3n2)NC(=S)NC(=O)C4=CC(=O)C(C4)OC)OC)C                              |
| ZINC08441866 | 4.38  | -5.05             | -16.79           | 2        | 6           | 0      | 444.94          | 8              | CCOC1ccc(cc1)NC(=O)C2=CC(=O)C(C2)CNS(=O)C(=O)C3ccc(c3)Cl                                 |
| ZINC00881677 | 3.06  | 0.13              | -29.44           | 2        | 9           | 0      | 477.546         | 8              | Cc1cc2c(c1)NC(=S)NC(=O)C3=CC(=O)C(C3)OC)OC)C4=CC(=O)C(C4)OC)C                            |
| ZINC08441865 | 1.17  | 3.31              | -19.99           | 3        | 10          | 0      | 441.488         | 9              | CCN(CC)C(=O)COC1ccc(cc1OC)[C@@H]2c3c([nH]nc3OC=C2C#N)N)COC                               |
| ZINC00881672 | 3.13  | -0.07             | -29.77           | 2        | 9           | 0      | 477.546         | 8              | Cc1ccc(cc1)n2nc3ccc(cc3n2)NC(=S)NC(=O)C4=CC(=O)C(C4)OC)OC)C                              |
| ZINC06143751 | 3.17  | 9.86              | -17.8            | 2        | 9           | 0      | 461.532         | 6              | c1ccc(cc1)c2nc(sn2)NC(=O)CSc3nc4c(c[nH]n4)C(=O)Nc5cccc5                                  |
| ZINC00881660 | 2.58  | -0.18             | -31.01           | 2        | 9           | 0      | 425.85          | 8              | COC1cc(ccc1OC)OC)C(=O)NC(=S)Nc2ccc(c2)C1N(=O)C(=O)C1                                     |
| ZINC08441864 | 3.65  | 8.84              | -55.82           | 2        | 7           | 1      | 432.548         | 7              | [H]/N=C/1/[C2=C(C)NH+](C)[C@@H]2[C@@H]([C1(C#N)C#N]c3ccc(cc3OC)OCC)CCC)C#N               |
| ZINC08441864 | 3.65  | 8.95              | -109.68          | 3        | 7           | 2      | 433.556         | 7              | CC(C)NH+1CC=C2(C)H(C1)[C@H]([C1(C)C(=O)NH2+])C2(C#N)C#N)C#N(C=O)OCC                      |
| ZINC00881656 | 4.37  | -2.9              | -23.68           | 2        | 7           | 0      | 467.934         | 7              | COC1ccc(cc1OC)C(=O)NC(=S)Nc2ccc3c(c2)nc(o3)c4ccc(cc4)Cl                                  |
| ZINC00881655 | 3.85  | -2.01             | -24.15           | 2        | 7           | 0      | 451.479         | 7              | COC1ccc(cc1OC)C(=O)NC(=S)Nc2ccc3c(c2)nc(o3)c4ccc(cc4)F                                   |
| ZINC00881652 | 4.34  | -2.87             | -30.75           | 2        | 7           | 0      | 467.934         | 7              | COC1ccc(cc1OC)C(=O)NC(=S)Nc2ccc3c(c2)nc(o3)c4ccc(cc4)Cl                                  |
| ZINC02889263 | 4.12  | -4.56             | -15.18           | 1        | 6           | 0      | 425.564         | 5              | c1ccc(cc1)c2nc(ns2)NC(=O)CSc3c4c5c4se4nc3)JCC5                                           |
| ZINC00881648 | 3.71  | -2.76             | -24.39           | 2        | 7           | 0      | 433.489         | 7              | COC1ccc(cc1OC)C(=O)NC(=S)Nc2ccc3c(c2)nc(o3)c4ccc(cc4)F                                   |
| ZINC08441863 | 1.89  | 4.37              | -12.3            | 2        | 9           | 0      | 474.565         | 6              | CN1CC=C2[C@@H]([C@@H]([C1(C)C(=O)C2#N]N)C#N)C#N]c3ccc(c(c3)OC)OCCN4CCOCC4                |
| ZINC08441863 | 1.97  | 1.57              | -174.92          | 4        | 9           | 3      | 477.589         | 6              | [C]NH+1CC=C2(C)H(C1)[C@H]([C1(C)C(=O)NH2+])C2(C#N)C#N)C#N]c3ccc(c(c3)OC)OCC[NH+4CCOCC4   |
| ZINC08441863 | 1.89  | 6.75              | -43.51           | 3        | 9           | 1      | 475.573         | 6              | CN1CC=C2[C@@H]([C@@H]([C1(C)C(=O)C2#N]N)C#N)C#N]c3ccc(c(c3)OC)OCC[NH+4CCOCC4             |
| ZINC00881612 | 2.65  | -1.09             | -20.08           | 2        | 5           | 0      | 423.332         | 6              | Cc1ccc(cc1)NC(=S)NC(=O)C2=CC(=O)C(C2)OC)OC)CBr                                           |
| ZINC00881603 | 3.34  | -1.41             | -30.93           | 3        | 7           | 0      | 449.532         | 8              | Cc1ccc(cc1)C(=O)NC2ccc(c2)NC(=S)NC(=O)C3ccc(c3)OC)OC                                     |
| ZINC00881599 | 3.3   | -1.48             | -25.48           | 3        | 7           | 0      | 449.532         | 8              | Cc1ccc(cc1)C(=O)NC2ccc(c2)NC(=S)NC(=O)C3ccc(c3)OC)OC                                     |
| ZINC08441862 | 3.9   | 9.31              | -17.37           | 1        | 7           | 0      | 465.557         | 6              | [H]/N=C/1/[C@@H]([C2=CCN(C)C@H]2)[C@@H]([C1(C#N)C#N]c3ccc(c(c3)OC)OCC)CC4=CC(=O)C(C4)C#N |
| ZINC08441862 | 3.9   | 2.83              | -131.13          | 3        | 7           | 2      | 467.573         | 6              | COC1ccc(cc1OC)[C@@H]2[C@@H]3CN(C#N)C#N)C#N(C=O)OCC)C4=CC(=O)C(C4)OC)C                    |
| ZINC01805638 | 4.23  | 0.41              | -10.66           | 0        | 5           | 0      | 437.59          | 8              | Cc1ccc(cc1)C(C)OC)C(=O)CSc2c3c(csc3n2)nc4cccc4                                           |
| ZINC00881590 | 4.54  | -2.11             | -28.47           | 2        | 7           | 0      | 461.543         | 7              | Cc1cc(c2c(c1)nc(o2)c3ccc(cc3)NC(=S)NC(=O)C4=CC(=O)C(C4)OC)OC)C                           |
| ZINC00630503 | 4.78  | 10.95             | -14.88           | 1        | 6           | 0      | 455.539         | 8              | COC1ccc(cc1)C2=CC(=O)C(C2)NC(=S)Nc3ccc(c3)OC)OC)C4=CC(=O)C(C4)OC)C                       |
| ZINC00630492 | 4.49  | 10.1              | -14.69           | 1        | 6           | 0      | 459.571         | 8              | COC1ccc(cc1)C2=CC(=O)C(C2)NC(=S)Nc3ccc(c3)OC)OC)C4=CC(=O)C(C4)OC)C                       |
| ZINC00881588 | 4.54  | -2.13             | -27.26           | 2        | 7           | 0      | 461.543         | 7              | Cc1ccc(cc1)C2=CC(=O)C(C2)NC(=S)Nc3ccc(c3)OC)OC)C4=CC(=O)C(C4)OC)C                        |
| ZINC00630498 | 4.49  | 10.07             | -14.97           | 1        | 6           | 0      | 459.571         | 8              | COC1ccc(cc1)C2=CC(=O)C(C2)NC(=S)Nc3ccc(c3)OC)OC)C4=CC(=O)C(C4)OC)C                       |
| ZINC00881586 | 4.63  | -2.28             | -26.72           | 2        | 7           | 0      | 461.543         | 8              | Cc1ccc(cc1)C2=CC(=O)C(C2)NC(=S)Nc3ccc(c3)OC)OC)C4=CC(=O)C(C4)OC)C                        |
| ZINC00630488 | 4.89  | 8.31              | -11.08           | 3        | 6           | 0      | 459.571         | 6              | COC1ccc(cc1)C2=CC(=O)C(C2)NC(=S)Nc3ccc(c3)OC)OC)C4=CC(=O)C(C4)OC)C                       |
| ZINC00881582 | 4.16  | -2.43             | -27.07           | 2        | 7           | 0      | 447.516         | 7              | Cc1ccc(cc1)C2=CC(=O)C(C2)NC(=S)Nc3ccc(c3)OC)OC)C4=CC(=O)C(C4)OC)C                        |
| ZINC01805608 | 2.5   | -2.39             | -54.7            | 2        | 7           | 1      | 439.561         | 8              | Cc1ccc(cc1)n2c(c=O)c3ccc3nc2SCC(=O)NCCC[NH+4CCOCC4                                       |
| ZINC00881578 | 4.81  | -2.14             | -27.59           | 2        | 6           | 0      | 463.584         | 7              | Cc1ccc(cc1)C2=CC(=O)C(C2)NC(=S)Nc3ccc(c3)OC)OC)C4=CC(=O)C(C4)OC)C                        |
| ZINC08441861 | 6.38  | 10.21             | -52.98           | 0        | 6           | -1     | 465.595         | 10             | Cc1ccc(cc1)C2=CC(=O)C(C2)NC(=S)Nc3ccc(c3)OC)OC)C4=CC(=O)C(C4)OC)C                        |
| ZINC08441861 | 5.92  | 11.07             | -20.94           | 1        | 6           | 0      | 466.603         | 10             | Cc1ccc(cc1)C2=CC(=O)C(C2)NC(=S)Nc3ccc(c3)OC)OC)C4=CC(=O)C(C4)OC)C                        |
| ZINC00881571 | 2.84  | -3.44             | -32.96           | 2        | 8           | 0      | 434.477         | 7              | COC1ccc(cc1OC)C(=O)NC(=S)Nc2ccc(c2)c3nc4c(o3)cccc4                                       |
| ZINC00630394 | 6.2   | 16.81             | -16.27           | 0        | 5           | 0      | 481.408         | 5              | Cc1ccc(cc1)C2=CC(=O)C(C2)NC(=S)Nc3ccc(c3)OC)OC)C4=CC(=O)C(C4)OC)C                        |





**Supplementary Table S2:**  
**Detailed table of XP Docking using Schrodinger's Glide module**

| ZINC_ID      | sLogP | ApolarDesolvation | PolarDesolvation | H Donors | H Acceptors | Charge | MolecularWeight | RotatableBonds | SMILES                                                                       |
|--------------|-------|-------------------|------------------|----------|-------------|--------|-----------------|----------------|------------------------------------------------------------------------------|
| ZINC08441840 | 7.23  | -1.25             | -9.18            | 0        | 5           | 0      | 558.538         | 8              | Cc1c(cc(s1))[C@H]2C3C(=O)CC(C=C3N=C(C2C(=O)O)CC(C)(C)C)C0c4ccc(cc4)Br        |
| ZINC08441839 | 7.11  | 15.73             | -18.66           | 1        | 5           | 0      | 558.538         | 8              | Cc1c(cc(s1))[C@H]2C3C(=O)CC(C=C3=O)(C)NC(=C2C(=O)O)CC(C)C0c4ccc(cc4)Br       |
| ZINC08441839 | 7.23  | -1.38             | -11.43           | 0        | 5           | 0      | 558.538         | 8              | Cc1c(cc(s1))[C@H]2C3C(=O)CC(C=C3N=C(C2C(=O)O)CC(C)(C)C)C0c4ccc(cc4)Br        |
| ZINC08441838 | 6.74  | 14.81             | -18.7            | 1        | 5           | 0      | 544.511         | 7              | Cc1c(cc(s1))[C@H]2C3C(=O)CC(C=C3=O)(C)NC(=C2C(=O)O)CC(C)C0c4ccc(cc4)Br       |
| ZINC08441838 | 6.85  | -1.37             | -9.68            | 0        | 5           | 0      | 544.511         | 7              | Cc1c(cc(s1))[C@H]2C3C(=O)CC(C=C3N=C(C2C(=O)O)CC(C)(C)C)C0c4ccc(cc4)Br        |
| ZINC08441837 | 6.74  | 14.8              | -18.69           | 1        | 5           | 0      | 544.511         | 7              | Cc1c(cc(s1))[C@H]2C3C(=O)CC(C=C3=O)(C)NC(=C2C(=O)O)CC(C)C0c4ccc(cc4)Br       |
| ZINC08441837 | 6.85  | -1.38             | -9.85            | 0        | 5           | 0      | 544.511         | 7              | Cc1c(cc(s1))[C@H]2C3C(=O)CC(C=C3N=C(C2C(=O)O)CC(C)(C)C)C0c4ccc(cc4)Br        |
| ZINC08441836 | 6.86  | -2.47             | -13.35           | 2        | 2           | 0      | 552.059         | 7              | CC1=C([C@H](n2c(=O)/c=C/c3c[nH]nc34cccc4)/sc2=N1)c5ccc(cc5)C1C(=O)Nc6cccc6   |
| ZINC08441835 | 6.86  | -2.54             | -13.45           | 2        | 2           | 0      | 552.059         | 7              | CC1=C([C@H](n2c(=O)/c=C/c3c[nH]nc34cccc4)/sc2=N1)c5ccc(cc5)C1C(=O)Nc6cccc6   |
| ZINC08441832 | 7.15  | 1.42              | -9.64            | 2        | 0           | 0      | 552.509         | 5              | CCOC(=O)C1[C@H](C2=C(C(C2=O)(C)C)N=C1C)c3cc(c(cc3C)C)C0c4ccc4Br              |
| ZINC08441832 | 7.33  | 0.23              | -11.01           | 0        | 5           | 0      | 552.509         | 7              | CCOC(=O)C1[C@H](C2=C(NC1=C)CC(C2=O)(C)C)c3cc(c(cc3C)C)C0c4ccc4Br             |
| ZINC08441832 | 7.15  | 1.33              | -12.55           | 0        | 5           | 0      | 552.509         | 7              | CCOC(=O)C1=C(N=C2CC(C2=O)C2[C@H]1c3cc(c(cc3C)C)C0c4ccc4Br)(C)C               |
| ZINC08441831 | 7.15  | 1.38              | -9.96            | 2        | 0           | 0      | 552.509         | 5              | CCOC(=O)C1[C@H](C2=C(C(C2=O)(C)C)N=C1C)c3cc(c(cc3C)C)C0c4ccc4Br              |
| ZINC08441831 | 7.33  | -0.04             | -11.74           | 0        | 5           | 0      | 552.509         | 7              | CCOC(=O)C1[C@H](C2=C(NC1=C)CC(C2=O)(C)C)c3cc(c(cc3C)C)C0c4ccc4Br             |
| ZINC08441831 | 7.15  | 1.22              | -13.32           | 0        | 5           | 0      | 552.509         | 7              | CCOC(=O)C1=C(N=C2CC(C2=O)C2[C@H]1c3cc(c(cc3C)C)C0c4ccc4Br)(C)C               |
| ZINC08441830 | 7.45  | 1.5               | -7.52            | 2        | 0           | 0      | 524.126         | 4              | CCOC(=O)C1[C@H](C2=C(C(C2=O)(C)C)N=C1C)c3cc(c(cc3C)C)C0c4ccc(cc4)Cl          |
| ZINC08441830 | 7.63  | 0.32              | -8.34            | 0        | 4           | 0      | 524.126         | 7              | CCOC(=O)C1[C@H](C2=C(NC1=C)CC(C2=O)(C)C)c3cc(c(cc3C)C)C0c4ccc(cc4)Cl         |
| ZINC08441830 | 7.45  | 1.42              | -10.02           | 0        | 4           | 0      | 524.126         | 7              | CCOC(=O)C1=C(N=C2CC(C2=O)C2[C@H]1c3cc(c(cc3C)C)C0c4ccc(cc4)Cl)(C)C           |
| ZINC08441829 | 7.45  | 1.51              | -7.72            | 2        | 0           | 0      | 524.126         | 4              | CCOC(=O)C1[C@H](C2=C(C(C2=O)(C)C)N=C1C)c3cc(c(cc3C)C)C0c4ccc(cc4)Cl          |
| ZINC08441829 | 7.45  | 1.35              | -11.68           | 0        | 4           | 0      | 524.126         | 7              | CCOC(=O)C1=C(N=C2CC(C2=O)C2[C@H]1c3cc(c(cc3C)C)C0c4ccc(cc4)Cl)(C)C           |
| ZINC08441829 | 7.63  | 0.09              | -9.56            | 0        | 4           | 0      | 524.126         | 7              | CCOC(=O)C1[C@H](C2=C(NC1=C)CC(C2=O)(C)C)c3cc(c(cc3C)C)C0c4ccc(cc4)Cl         |
| ZINC08441828 | 6.41  | 14.93             | -17.7            | 1        | 4           | 0      | 502.101         | 6              | Cc1c(cc(s1))[C@H]2C3C(=O)CC(C=C3=O)(C)NC(=C2C(=O)O)CC(C)C0c4ccc(cc4)Cl       |
| ZINC08441828 | 6.53  | -1.29             | -8.61            | 0        | 4           | 0      | 502.101         | 6              | Cc1c(cc(s1))[C@H]2C3C(=O)CC(C=C3N=C(C2C(=O)O)CC(C)C)C0c4ccc(cc4)Cl           |
| ZINC08441827 | 6.41  | 14.92             | -18.06           | 1        | 4           | 0      | 502.101         | 6              | Cc1c(cc(s1))[C@H]2C3C(=O)CC(C=C3=O)(C)NC(=C2C(=O)O)CC(C)C0c4ccc(cc4)Cl       |
| ZINC08441827 | 6.53  | -1.31             | -9.07            | 0        | 4           | 0      | 502.101         | 6              | Cc1c(cc(s1))[C@H]2C3C(=O)CC(C=C3N=C(C2C(=O)O)CC(C)C)C0c4ccc(cc4)Cl           |
| ZINC08441826 | 6.18  | -2.32             | -14.63           | 2        | 2           | 0      | 517.614         | 7              | CC1=C([C@H](n2c(=O)/c=C/c3c[nH]nc34cccc4)/sc2=N1)c5ccc(cc5)C1C(=O)Nc6cccc6   |
| ZINC08441825 | 6.18  | -2.39             | -15.12           | 2        | 2           | 0      | 517.614         | 7              | CC1=C([C@H](n2c(=O)/c=C/c3c[nH]nc34cccc4)/sc2=N1)c5ccc(cc5)C1C(=O)Nc6cccc6   |
| ZINC08441824 | 6.24  | -2                | -15.19           | 2        | 2           | 0      | 547.64          | 8              | CC1=C([C@H](n2c(=O)/c=C/c3c[nH]nc34cccc4)/sc2=N1)c5ccc(cc5)O(C)C(=O)Nc6cccc6 |
| ZINC08441823 | 6.24  | -2.22             | -16.21           | 2        | 2           | 0      | 547.64          | 8              | CC1=C([C@H](n2c(=O)/c=C/c3c[nH]nc34cccc4)/sc2=N1)c5ccc(cc5)O(C)C(=O)Nc6cccc6 |
| ZINC01009265 | 5.66  | -2.07             | -15.88           | 2        | 2           | 0      | 521.602         | 8              | Cc1ccc(o1)[C@H]2C(=O)C(C=C3N=C(C2C(=O)O)CC(C)C)C0c4ccc(cc4)Cl                |
| ZINC01009267 | 5.66  | -1.99             | -16.03           | 2        | 2           | 0      | 521.602         | 8              | Cc1ccc(o1)[C@H]2C(=O)C(C=C3N=C(C2C(=O)O)CC(C)C)C0c4ccc(cc4)Cl                |
| ZINC08441822 | 6.17  | 13.84             | -14.57           | 1        | 5           | 0      | 510.428         | 6              | Cc1cc(c(cc1C)C)C0c2ccc2Br                                                    |
| ZINC08441822 | 6.29  | -0.94             | -11.24           | 0        | 5           | 0      | 510.428         | 6              | Cc1cc(c(cc1C)C)C0c2ccc2Br                                                    |
| ZINC08441821 | 6.17  | 13.86             | -14.66           | 1        | 5           | 0      | 510.428         | 6              | Cc1cc(c(cc1C)C)C0c2ccc2Br                                                    |
| ZINC08441821 | 6.29  | -0.73             | -10.34           | 0        | 5           | 0      | 510.428         | 6              | Cc1cc(c(cc1C)C)C0c2ccc2Br                                                    |
| ZINC08441820 | 5.9   | 13.36             | -23.98           | 1        | 5           | 0      | 472.006         | 7              | Cc1c(cc(s1))[C@H]2C3C(=O)CC(C=C3=O)NC(=C2C(=O)O)CC(C)C0c4ccc4Cl              |
| ZINC08441820 | 6.02  | -1.62             | -12.04           | 0        | 5           | 0      | 472.006         | 7              | Cc1c(cc(s1))[C@H]2C3C(=O)CC(C=C3N=C(C2C(=O)O)CC(C)C)C0c4ccc4Cl               |
| ZINC08441819 | 6.62  | -0.19             | -12.62           | 1        | 7           | 0      | 622.497         | 7              | c1ccc2c(c1)cc(o2)c(=O)C3=C(C(=O)N(C@H)3c4ccc(e4)Br)c5nnc(s5)SC6cccc(cc6)F    |
| ZINC08441819 | 6.04  | -0.35             | -13.59           | 0        | 7           | 0      | 622.497         | 7              | c1ccc2c(c1)cc(o2)c(=O)C3=C(C(=O)N(C@H)3c4ccc(e4)Br)c5nnc(s5)SC6cccc(cc6)F    |
| ZINC08441818 | 5.9   | 13.86             | -31.82           | 1        | 5           | 0      | 472.006         | 7              | CCc1c(cc(s1))[C@H]2C3C(=O)CC(C=C3=O)NC(=C2C(=O)O)CC(C)C0c4ccc4Cl             |
| ZINC08441818 | 6.02  | -1.5              | -15.65           | 0        | 5           | 0      | 472.006         | 7              | CCc1c(cc(s1))[C@H]2C3C(=O)CC(C=C3N=C(C2C(=O)O)CC(C)C)C0c4ccc4Cl              |
| ZINC08441817 | 6.62  | -0.13             | -13.61           | 1        | 7           | 0      | 622.497         | 7              | c1ccc2c(c1)cc(o2)c(=O)C3=C(C(=O)N(C@H)3c4ccc(e4)Br)c5nnc(s5)SC6cccc(cc6)F    |
| ZINC08441817 | 6.04  | -0.31             | -16.79           | 0        | 7           | 0      | 622.497         | 7              | c1ccc2c(c1)cc(o2)c(=O)C3=C(C(=O)N(C@H)3c4ccc(e4)Br)c5nnc(s5)SC6cccc(cc6)F    |
| ZINC08441816 | 6.58  | -1.72             | -15.6            | 2        | 2           | 0      | 531.641         | 7              | Cc1cccc1NC(=O)C2=C(N=C3n(c=O)/c=C/c4c[nH]nc45cccc5/s3)[C@H]2c6cccc6C         |
| ZINC08441815 | 4.31  | 0.94              | -17.09           | 1        | 9           | 0      | 553.596         | 8              | Cc1nnc(s1)N2[C@H]([C@H](C(=O)C2=O)C(=O)c3cc4ccc4o3)c5ccc(c(c5)O)C0c6cccc6    |
| ZINC08441815 | 3.73  | 0.8               | -18.96           | 0        | 9           | 0      | 553.596         | 8              | Cc1nnc(s1)N2[C@H]([C@H](C(=O)C2=O)C(=O)c3cc4ccc4o3)c5ccc(c(c5)O)C0c6cccc6    |
| ZINC08441814 | 6.58  | -1.35             | -14.06           | 2        | 2           | 0      | 531.641         | 7              | Cc1cccc1NC(=O)C2=C(N=C3n(c=O)/c=C/c4c[nH]nc45cccc5/s3)[C@H]2c6cccc6C         |
| ZINC00703153 | 4.31  | 0.88              | -17.01           | 1        | 9           | 0      | 553.596         | 8              | Cc1nnc(s1)N2[C@H]([C@H](C(=O)C2=O)C(=O)c3cc4ccc4o3)c5ccc(c(c5)O)C0c6cccc6    |
| ZINC00703153 | 3.73  | 0.66              | -19.59           | 0        | 9           | 0      | 553.596         | 8              | Cc1nnc(s1)N2[C@H]([C@H](C(=O)C2=O)C(=O)c3cc4ccc4o3)c5ccc(c(c5)O)C0c6cccc6    |
| ZINC08441813 | 6.79  | 0.9               | -8.5             | 1        | 0           | 0      | 496.072         | 4              | CCOC(=O)C1[C@H](C2=C(C(C2=O)N=C1C)c3cc(c(cc3C)C)C0c4ccc(cc4)Cl               |
| ZINC08441813 | 6.97  | -0.38             | -10.13           | 0        | 4           | 0      | 496.072         | 7              | CCOC(=O)C1[C@H](C2=C(NC1=C)CC(C2=O)c3cc(c(cc3C)C)C0c4ccc(cc4)Cl              |
| ZINC08441813 | 6.79  | 0.54              | -11.55           | 0        | 4           | 0      | 496.072         | 7              | CCOC(=O)C1=C(N=C2CCC(=O)C2[C@H]1c3cc(c(cc3C)C)C0c4ccc(cc4)Cl                 |
| ZINC08441812 | 4.8   | 0.88              | -14.81           | 1        | 8           | 0      | 509.543         | 6              | Cc1nnc(s1)N2[C@H]([C@H](C(=O)C2=O)C(=O)c3cc4ccc4o3)c5ccc(c(c5)O)c6cccc6      |
| ZINC08441812 | 4.22  | 0.72              | -15.01           | 0        | 8           | 0      | 509.543         | 6              | Cc1nnc(s1)N2[C@H]([C@H](C(=O)C2=O)C(=O)c3cc4ccc4o3)c5ccc(c(c5)O)c6cccc6      |
| ZINC08441811 | 4.8   | 0.94              | -14.93           | 1        | 8           | 0      | 509.543         | 6              | Cc1nnc(s1)N2[C@H]([C@H](C(=O)C2=O)C(=O)c3cc4ccc4o3)c5ccc(c(c5)O)c6cccc6      |
| ZINC08441811 | 4.22  | 0.77              | -15.29           | 0        | 8           | 0      | 509.543         | 6              | Cc1nnc(s1)N2[C@H]([C@H](C(=O)C2=O)C(=O)c3cc4ccc4o3)c5ccc(c(c5)O)c6cccc6      |
| ZINC08441810 | 6.79  | 0.97              | -8.27            | 1        | 0           | 0      | 496.072         | 4              | CCOC(=O)C1[C@H](C2=C(C(C2=O)N=C1C)c3cc(c(cc3C)C)C0c4ccc(cc4)Cl               |
| ZINC08441810 | 6.97  | -0.09             | -11.08           | 0        | 4           | 0      | 496.072         | 7              | CCOC(=O)C1[C@H](C2=C(NC1=C)CC(C2=O)c3cc(c(cc3C)C)C0c4ccc(cc4)Cl              |
| ZINC08441810 | 6.79  | 0.77              | -12.44           | 0        | 4           | 0      | 496.072         | 7              | CCOC(=O)C1=C(N=C2CCC(=O)C2[C@H]1c3cc(c(cc3C)C)C0c4ccc(cc4)Cl                 |
| ZINC00703148 | 4.35  | 0                 | -13.58           | 1        | 7           | 0      | 486.336         | 4              | Cc1nnc(s1)N2[C@H]([C@H](C(=O)C2=O)C(=O)c3cc4ccc4o3)c5ccc(c(c5)C)Cl           |
| ZINC00703148 | 3.77  | -0.19             | -16.62           | 0        | 7           | 0      | 486.336         | 4              | Cc1nnc(s1)N2[C@H]([C@H](C(=O)C2=O)C(=O)c3cc4ccc4o3)c5ccc(c(c5)C)Cl           |

Supplementary Table S2:

Detailed table of XP Docking using Schrodinger's Glide module

| ZINC_ID      | stLogP | ApolarDesolvation | PolarDesolvation | H Donors | H Acceptors | Charge | MolecularWeight | RotatableBonds | SMILES                                                                                       |
|--------------|--------|-------------------|------------------|----------|-------------|--------|-----------------|----------------|----------------------------------------------------------------------------------------------|
| ZINC08441809 | 6.69   | 2.91              | -12.04           | 1        | 1           | 0      | 485.056         | 4              | [H]/N=C/1/[C@H](C2=CCCC[C@@H]2[C@@H](C1(C#N)C#N)c3ccf(cc3C)C)CS4cccc(cc4)C1]C#N              |
| ZINC08441809 | 6.69   | 2.74              | -36.92           | 2        | 4           | 1      | 486.064         | 4              | Cc1ccf(cc1CSc2ccc(cc2)C)[C@H]3[C@@H]4CCCC=C4[C@@H](C1=[NH2+])C3(C#N)C#N]C#N                  |
| ZINC00703149 | 4.35   | -0.01             | -13.56           | 1        | 7           | 0      | 486.336         | 4              | Cc1nnc(s1)N2[C@@H]([C@H](C1=C2=O)C)=O)c3cc4cccc4o3)c5ccc(cc5)C1]C1                           |
| ZINC00703149 | 3.77   | -0.2              | -16.64           | 0        | 7           | 0      | 486.336         | 4              | Cc1nnc(s1)N2[C@@H]([C@H](C1=C2=O)C)=O)c3cc4cccc4o3)c5ccc(cc5)C1]C1                           |
| ZINC00703147 | 3.85   | -0.48             | -13.95           | 1        | 7           | 0      | 496.342         | 4              | Cc1nnc(s1)N2[C@@H]([C@H](C1=C2=O)C)=O)c3cc4cccc4o3)c5ccc(cc5)Br                              |
| ZINC00703147 | 3.27   | -0.66             | -16.78           | 0        | 7           | 0      | 496.342         | 4              | Cc1nnc(s1)N2[C@@H]([C@H](C1=C2=O)C)=O)c3cc4cccc4o3)c5ccc(cc5)Br                              |
| ZINC08441808 | 6.69   | 2.46              | -10.16           | 1        | 1           | 0      | 485.056         | 4              | [H]/N=C/1/[C@H](C2=CCCC[C@@H]2[C@@H](C1(C#N)C#N)c3ccf(cc3C)C)CS4cccc(cc4)C1]C#N              |
| ZINC08441808 | 6.69   | 2.29              | -41.57           | 2        | 4           | 1      | 486.064         | 4              | Cc1ccf(cc1CSc2ccc(cc2)C)[C@H]3[C@@H]4CCCC=C4[C@@H](C1=[NH2+])C3(C#N)C#N]C#N                  |
| ZINC08441807 | 6.69   | 3.03              | -10.64           | 1        | 1           | 0      | 485.056         | 4              | [H]/N=C/1/[C@H](C2=CCCC[C@@H]2[C@@H](C1(C#N)C#N)c3ccf(cc3C)C)CS4cccc(cc4)C1]C#N              |
| ZINC08441807 | 6.69   | 2.86              | -37.58           | 2        | 4           | 1      | 486.064         | 4              | Cc1ccf(cc1CSc2ccc(cc2)C)[C@H]3[C@@H]4CCCC=C4[C@@H](C1=[NH2+])C3(C#N)C#N]C#N                  |
| ZINC08441806 | 6.31   | 0.16              | -15.57           | 1        | 8           | 0      | 579.659         | 7              | Cc1ccc(o1)[C@H]2[C@@H](C1=C2=O)N2c3nnc(s3)SC4cccc5c4cccc5)O[C@H](C1=C2=O)c6cc7c7cccc7o6      |
| ZINC08441806 | 5.73   | -0.03             | -16.07           | 0        | 8           | 0      | 579.659         | 7              | Cc1ccc(o1)[C@H]2[C@@H](C1=C2=O)N2c3nnc(s3)SC4cccc5c4cccc5)C(=O)c6cc7c7cccc7o6                |
| ZINC08441805 | 5.26   | 4.19              | -15.9            | 1        | 1           | 0      | 494.595         | 7              | [H]/N=C/1/[C@H](C2=CCCC[C@@H]2[C@@H](C1(C#N)C#N)c3ccf(cc3C)C)C0c4f(ccc4O)OC]C#N              |
| ZINC08441805 | 5.26   | 4.03              | -31.06           | 2        | 7           | 1      | 495.603         | 6              | Cc1ccf(cc1C0c2f(ccc2O)OC)[C@H]3[C@@H]4CCCC=C4[C@@H](C1=[NH2+])C3(C#N)C#N]C#N                 |
| ZINC08441804 | 5.26   | 3.67              | -15.86           | 1        | 1           | 0      | 494.595         | 7              | [H]/N=C/1/[C@H](C2=CCCC[C@@H]2[C@@H](C1(C#N)C#N)c3ccf(cc3C)C)C0c4f(ccc4O)OC]C#N              |
| ZINC08441804 | 5.26   | 3.5               | -42.35           | 2        | 7           | 1      | 495.603         | 6              | Cc1ccf(cc1C0c2f(ccc2O)OC)[C@H]3[C@@H]4CCCC=C4[C@@H](C1=[NH2+])C3(C#N)C#N]C#N                 |
| ZINC08441803 | 6.31   | 0.16              | -15.55           | 1        | 8           | 0      | 579.659         | 7              | Cc1ccc(o1)[C@H]2[C@@H](C1=C2=O)N2c3nnc(s3)SC4cccc5c4cccc5)O[C@H](C1=C2=O)c6cc7c7cccc7o6      |
| ZINC08441803 | 5.73   | -0.01             | -17.44           | 0        | 8           | 0      | 579.659         | 7              | Cc1ccc(o1)[C@H]2[C@@H](C1=C2=O)N2c3nnc(s3)SC4cccc5c4cccc5)C(=O)c6cc7c7cccc7o6                |
| ZINC08441802 | 5.26   | 3.69              | -15.6            | 1        | 1           | 0      | 494.595         | 7              | [H]/N=C/1/[C@H](C2=CCCC[C@@H]2[C@@H](C1(C#N)C#N)c3ccf(cc3C)C)C0c4f(ccc4O)OC]C#N              |
| ZINC08441802 | 5.26   | 3.51              | -41.94           | 2        | 7           | 1      | 495.603         | 6              | Cc1ccf(cc1C0c2f(ccc2O)OC)[C@H]3[C@@H]4CCCC=C4[C@@H](C1=[NH2+])C3(C#N)C#N]C#N                 |
| ZINC08441801 | 6.95   | 0.73              | -14.65           | 1        | 7           | 0      | 593.661         | 7              | c1ccc2c(c1)cccc2CSc3nnc(s3)N4[C@@H](C1=C(C4=O)C)=O)c5ccc6c6o5)c7c7cccc7F                     |
| ZINC08441801 | 6.36   | 0.56              | -14.66           | 0        | 7           | 0      | 593.661         | 7              | c1ccc2c(c1)cccc2CSc3nnc(s3)N4[C@@H](C1=C(C4=O)C)=O)c5ccc6c6o5)c7c7cccc7F                     |
| ZINC08441800 | 5.26   | 4.3               | -15.13           | 1        | 1           | 0      | 494.595         | 7              | [H]/N=C/1/[C@H](C2=CCCC[C@@H]2[C@@H](C1(C#N)C#N)c3ccf(cc3C)C)C0c4f(ccc4O)OC]C#N              |
| ZINC08441800 | 5.26   | 4.13              | -31.23           | 2        | 7           | 1      | 495.603         | 6              | Cc1ccf(cc1C0c2f(ccc2O)OC)[C@H]3[C@@H]4CCCC=C4[C@@H](C1=[NH2+])C3(C#N)C#N]C#N                 |
| ZINC08441799 | 6.95   | 0.76              | -14.67           | 1        | 7           | 0      | 593.661         | 7              | c1ccc2c(c1)cccc2CSc3nnc(s3)N4[C@@H](C1=C(C4=O)C)=O)c5ccc6c6o5)c7c7cccc7F                     |
| ZINC08441799 | 6.36   | 0.58              | -14.6            | 0        | 7           | 0      | 593.661         | 7              | c1ccc2c(c1)cccc2CSc3nnc(s3)N4[C@@H](C1=C(C4=O)C)=O)c5ccc6c6o5)c7c7cccc7F                     |
| ZINC08441798 | 6.64   | -1.79             | -15.77           | 2        | 2           | 0      | 561.667         | 8              | CN(C)C1ccc(cc1)[C@H]2[C@@H](C1=C2=O)N2c3nnc(s3)SC4cccc5c4cccc5)O[C@H](C1=C2=O)c6cc7c7cccc7o6 |
| ZINC08441797 | 6.93   | 0.01              | -14.54           | 1        | 8           | 0      | 618.74          | 8              | CN(C)C1ccc(cc1)[C@H]2[C@@H](C1=C2=O)N2c3nnc(s3)SC4cccc5c4cccc5)O[C@H](C1=C2=O)c6cc7c7cccc7o6 |
| ZINC08441796 | 6.64   | -1.3              | -14.78           | 2        | 2           | 0      | 561.667         | 8              | CN(C)C1ccc(cc1)[C@H]2[C@@H](C1=C2=O)N2c3nnc(s3)SC4cccc5c4cccc5)O[C@H](C1=C2=O)c6cc7c7cccc7o6 |
| ZINC08441795 | 6.93   | -0.04             | -14.63           | 1        | 8           | 0      | 618.74          | 8              | CN(C)C1ccc(cc1)[C@H]2[C@@H](C1=C2=O)N2c3nnc(s3)SC4cccc5c4cccc5)O[C@H](C1=C2=O)c6cc7c7cccc7o6 |
| ZINC00650985 | 4.9    | -2.18             | -8.98            | 0        | 3           | 0      | 436.968         | 5              | Cc1ccf(cc1CSc2ccc(cc2)C)[C@H]3C4c(nH)C4O(C=C3C#N)N]C                                         |
| ZINC08441794 | 8.34   | 0.79              | -13.42           | 1        | 7           | 0      | 617.752         | 8              | CC(C)C1ccc(cc1)[C@H]2[C@@H](C1=C2=O)N2c3nnc(s3)SC4cccc5c4cccc5)O[C@H](C1=C2=O)c6cc7c7cccc7o6 |
| ZINC08441794 | 7.76   | 0.62              | -14.63           | 0        | 7           | 0      | 617.752         | 8              | CC(C)C1ccc(cc1)[C@H]2[C@@H](C1=C2=O)N2c3nnc(s3)SC4cccc5c4cccc5)C(=O)c6cc7c7cccc7o6           |
| ZINC00650986 | 4.9    | -2.19             | -8.77            | 0        | 3           | 0      | 436.968         | 5              | Cc1ccf(cc1CSc2ccc(cc2)C)[C@H]3C4c(nH)C4O(C=C3C#N)N]C                                         |
| ZINC08441793 | 8.34   | 0.7               | -13.46           | 1        | 7           | 0      | 617.752         | 8              | CC(C)C1ccc(cc1)[C@H]2[C@@H](C1=C2=O)N2c3nnc(s3)SC4cccc5c4cccc5)O[C@H](C1=C2=O)c6cc7c7cccc7o6 |
| ZINC08441792 | 6.56   | 14.27             | -23.21           | 1        | 5           | 0      | 500.06          | 7              | CC1(c(cc1)[C@H]2[C@@H](C1=C2=O)N2c3nnc(s3)SC4cccc5c4cccc5)O[C@H](C1=C2=O)c6cc7c7cccc7o6      |
| ZINC08441792 | 6.67   | -0.56             | -11.68           | 0        | 5           | 0      | 500.06          | 7              | CC1(c(cc1)[C@H]2[C@@H](C1=C2=O)N2c3nnc(s3)SC4cccc5c4cccc5)O[C@H](C1=C2=O)c6cc7c7cccc7o6      |
| ZINC08441791 | 7.53   | 0.47              | -14.35           | 1        | 8           | 0      | 631.735         | 10             | C=CC0c1ccc(cc1)[C@H]2[C@@H](C1=C2=O)N2c3nnc(s3)SC4cccc5c4cccc5)O[C@H](C1=C2=O)c6cc7c7cccc7o6 |
| ZINC08441791 | 6.95   | 0.31              | -15.55           | 0        | 8           | 0      | 631.735         | 10             | C=CC0c1ccc(cc1)[C@H]2[C@@H](C1=C2=O)N2c3nnc(s3)SC4cccc5c4cccc5)O[C@H](C1=C2=O)c6cc7c7cccc7o6 |
| ZINC08441790 | 6.56   | 14.27             | -23.43           | 1        | 5           | 0      | 500.06          | 7              | CC1(c(cc1)[C@H]2[C@@H](C1=C2=O)N2c3nnc(s3)SC4cccc5c4cccc5)O[C@H](C1=C2=O)c6cc7c7cccc7o6      |
| ZINC08441790 | 6.67   | -0.71             | -11.9            | 0        | 5           | 0      | 500.06          | 7              | CC1(c(cc1)[C@H]2[C@@H](C1=C2=O)N2c3nnc(s3)SC4cccc5c4cccc5)O[C@H](C1=C2=O)c6cc7c7cccc7o6      |
| ZINC08441789 | 7.53   | 0.39              | -14.33           | 1        | 8           | 0      | 631.735         | 10             | C=CC0c1ccc(cc1)[C@H]2[C@@H](C1=C2=O)N2c3nnc(s3)SC4cccc5c4cccc5)O[C@H](C1=C2=O)c6cc7c7cccc7o6 |
| ZINC08441789 | 6.95   | 0.21              | -16.44           | 0        | 8           | 0      | 631.735         | 10             | C=CC0c1ccc(cc1)[C@H]2[C@@H](C1=C2=O)N2c3nnc(s3)SC4cccc5c4cccc5)O[C@H](C1=C2=O)c6cc7c7cccc7o6 |
| ZINC08441788 | 8.33   | 0.22              | -14.04           | 1        | 8           | 0      | 647.778         | 11             | CC(C)C1ccc(cc1)[C@H]2[C@@H](C1=C2=O)N2c3nnc(s3)SC4cccc5c4cccc5)O[C@H](C1=C2=O)c6cc7c7cccc7o6 |
| ZINC08441788 | 7.74   | 0.05              | -15.17           | 0        | 8           | 0      | 647.778         | 11             | CC(C)C1ccc(cc1)[C@H]2[C@@H](C1=C2=O)N2c3nnc(s3)SC4cccc5c4cccc5)O[C@H](C1=C2=O)c6cc7c7cccc7o6 |
| ZINC08441787 | 6.5    | 0.82              | -10.55           | 2        | 0           | 0      | 524.455         | 5              | CCOC(=O)C1=C@H(C2=C(CCC2=O)N=C1C)C3ccf(cc3C)C)C0c4cccc4Br                                    |
| ZINC08441787 | 6.5    | 0.45              | -14.13           | 0        | 5           | 0      | 524.455         | 7              | CCOC(=O)C1=C@H(C2=C(CCC2=O)N=C1C)C3ccf(cc3C)C)C0c4cccc4Br                                    |
| ZINC08441787 | 6.68   | -0.46             | -12.87           | 0        | 5           | 0      | 524.455         | 7              | CCOC(=O)C1=C@H(C2=C(CCC2=O)N=C1C)C3ccf(cc3C)C)C0c4cccc4Br                                    |
| ZINC08441786 | 8.33   | 0.22              | -14.02           | 1        | 8           | 0      | 647.778         | 11             | CC(C)C1ccc(cc1)[C@H]2[C@@H](C1=C2=O)N2c3nnc(s3)SC4cccc5c4cccc5)O[C@H](C1=C2=O)c6cc7c7cccc7o6 |
| ZINC08441786 | 7.74   | 0.06              | -15.19           | 0        | 8           | 0      | 647.778         | 11             | CC(C)C1ccc(cc1)[C@H]2[C@@H](C1=C2=O)N2c3nnc(s3)SC4cccc5c4cccc5)O[C@H](C1=C2=O)c6cc7c7cccc7o6 |
| ZINC08441785 | 6.55   | -1.46             | -15.63           | 2        | 9           | 0      | 635.723         | 9              | CCOC1ccc(cc1O)[C@H]2[C@@H](C1=C2=O)N2c3nnc(s3)SC4cccc5c4cccc5)O[C@H](C1=C2=O)c6cc7c7cccc7o6  |
| ZINC08441785 | 5.96   | -1.6              | -17.44           | 1        | 9           | 0      | 635.723         | 9              | CCOC1ccc(cc1O)[C@H]2[C@@H](C1=C2=O)N2c3nnc(s3)SC4cccc5c4cccc5)O[C@H](C1=C2=O)c6cc7c7cccc7o6  |
| ZINC08441784 | 6.5    | 0.84              | -10.58           | 2        | 0           | 0      | 524.455         | 5              | CCOC(=O)C1=C@H(C2=C(CCC2=O)N=C1C)C3ccf(cc3C)C)C0c4cccc4Br                                    |
| ZINC08441784 | 6.68   | -0.23             | -13.04           | 0        | 5           | 0      | 524.455         | 7              | CCOC(=O)C1=C@H(C2=C(CCC2=O)N=C1C)C3ccf(cc3C)C)C0c4cccc4Br                                    |
| ZINC08441784 | 6.5    | 0.64              | -13.83           | 0        | 5           | 0      | 524.455         | 7              | CCOC(=O)C1=C@H(C2=C(CCC2=O)N=C1C)C3ccf(cc3C)C)C0c4cccc4Br                                    |
| ZINC08441783 | 6.55   | -1.48             | -15.64           | 2        | 9           | 0      | 635.723         | 9              | CCOC1ccc(cc1O)[C@H]2[C@@H](C1=C2=O)N2c3nnc(s3)SC4cccc5c4cccc5)O[C@H](C1=C2=O)c6cc7c7cccc7o6  |
| ZINC08441783 | 5.96   | -1.7              | -18.02           | 1        | 9           | 0      | 635.723         | 9              | CCOC1ccc(cc1O)[C@H]2[C@@H](C1=C2=O)N2c3nnc(s3)SC4cccc5c4cccc5)O[C@H](C1=C2=O)c6cc7c7cccc7o6  |
| ZINC08441782 | 8.54   | 1.14              | -13.4            | 1        | 7           | 0      | 631.779         | 8              | CC(C)C1ccc(cc1)[C@H]2[C@@H](C1=C2=O)N2c3nnc(s3)SC4cccc5c4cccc5)O[C@H](C1=C2=O)c6cc7c7cccc7o6 |
| ZINC08441782 | 7.95   | 0.97              | -14.3            | 0        | 7           | 0      | 631.779         | 8              | CC(C)C1ccc(cc1)[C@H]2[C@@H](C1=C2=O)N2c3nnc(s3)SC4cccc5c4cccc5)O[C@H](C1=C2=O)c6cc7c7cccc7o6 |
| ZINC08441781 | 6.46   | 15.16             | -15.95           | 1        | 4           | 0      | 482.045         | 6              | Cc1ccf(cc1CSc2ccc(cc2)C)[C@H]3C4=C(CCCC4=O)N(C=C3C=O)OC]C                                    |
| ZINC08441781 | 6.58   | -0.81             | -8.69            | 0        | 4           | 0      | 482.045         | 6              | Cc1ccf(cc1CSc2ccc(cc2)C)[C@H]3C4=C(CCCC4=O)N(C=C3C=O)OC]C                                    |









Supplementary Table S2:

Detailed table of XP Docking using Schrodinger's Glide module

| ZINC_ID      | sLogP | ApolarDesolvation | PolarDesolvation | H Donors | H Acceptors | Charge | MolecularWeight | RotatableBonds | SMILES                                                                                |
|--------------|-------|-------------------|------------------|----------|-------------|--------|-----------------|----------------|---------------------------------------------------------------------------------------|
| ZINC08441699 | 7.14  | 0.47              | -18.68           | 0        | 7           | 0      | 572.642         | 6              | Cc1cc(c2c(c1)scn2)N3[C@@H]1[C@@H]([C@H](C3=O)C)=O)c4cc5cccc5o4)c6cccc(c6)Oe7cccc7)C   |
| ZINC08441698 | 6.46  | 14.39             | -17.45           | 1        | 5           | 0      | 480.004         | 6              | Cc1cc(c1cc1COc2ccc(cc2C)C)1[C@@H]3C4=C(CCCC4=O)NC(=C3C=O)OC)C                         |
| ZINC08441698 | 6.58  | -0.01             | -9.68            | 0        | 5           | 0      | 480.004         | 6              | Cc1cc(c1cc1COc2ccc(cc2C)C)1[C@@H]3C4=C(CCC=C4N=C(C3C=O)OC)C                           |
| ZINC08441697 | 6.02  | 0.5               | -19.26           | 1        | 8           | 0      | 554.624         | 7              | CCOc1ccc(cc1OC)[C@@H]2[C@H](C(=O)N2c3nc4c(ccc4s3)C)C)O[C@H]3C4=C(CCC=C4N=C(C3C=O)OC)C |
| ZINC08441697 | 5.44  | 0.28              | -24.34           | 0        | 8           | 0      | 554.624         | 7              | CCOc1ccc(cc1OC)[C@@H]2[C@H]([C@H](C(=O)N2c3nc4c(ccc4s3)C)C)C)C(=O)c5cc6cccc6o5        |
| ZINC08441696 | 6.02  | 0.51              | -19.14           | 1        | 8           | 0      | 554.624         | 7              | CCOc1ccc(cc1OC)[C@@H]2[C@H](C(=O)N2c3nc4c(ccc4s3)C)C)O[C@H]3C4=C(CCC=C4N=C(C3C=O)OC)C |
| ZINC08441696 | 5.44  | 0.3               | -24.38           | 0        | 8           | 0      | 554.624         | 7              | CCOc1ccc(cc1OC)[C@@H]2[C@H]([C@H](C(=O)N2c3nc4c(ccc4s3)C)C)C)C(=O)c5cc6cccc6o5        |
| ZINC08441695 | 6.46  | 14.4              | -17.5            | 1        | 5           | 0      | 480.004         | 6              | Cc1cc(c1cc1COc2ccc(cc2C)C)1[C@@H]3C4=C(CCC=C4=O)NC(=C3C=O)OC)C                        |
| ZINC08441695 | 6.58  | 0.2               | -8.78            | 0        | 5           | 0      | 480.004         | 6              | Cc1cc(c1cc1COc2ccc(cc2C)C)1[C@@H]3C4=C(CCC=C4N=C(C3C=O)OC)C                           |
| ZINC0703128  | 5.52  | -1.97             | -17.34           | 2        | 7           | 0      | 496.544         | 4              | Cc1cc(c2c(c1)scn2)N3[C@@H]1[C@@H]([C@H](C3=O)C)=O)c4cc5cccc5o4)c6ccc(cc6)O)C          |
| ZINC0703128  | 4.93  | -2.13             | -20.66           | 1        | 7           | 0      | 496.544         | 4              | Cc1cc(c2c(c1)scn2)N3[C@@H]1[C@@H]([C@H](C3=O)C)=O)c4cc5cccc5o4)c6ccc(cc6)O)C          |
| ZINC0703129  | 5.52  | -1.9              | -16.96           | 2        | 7           | 0      | 496.544         | 4              | Cc1cc(c2c(c1)scn2)N3[C@@H]1[C@@H]([C@H](C3=O)C)=O)c4cc5cccc5o4)c6ccc(cc6)O)C          |
| ZINC0703129  | 4.93  | -2.08             | -21.17           | 1        | 7           | 0      | 496.544         | 4              | Cc1cc(c2c(c1)scn2)N3[C@@H]1[C@@H]([C@H](C3=O)C)=O)c4cc5cccc5o4)c6ccc(cc6)O)C          |
| ZINC08441694 | 5.76  | 13.26             | -20.6            | 1        | 5           | 0      | 472.006         | 6              | Cc1cc(ccc1OCc2cc(se2C)C)C@H]3C4=C(CCCC4=O)NC(=C3C=O)OC)C                              |
| ZINC08441694 | 5.88  | -1.39             | -10.23           | 0        | 5           | 0      | 472.006         | 6              | Cc1cc(ccc1OCc2cc(se2C)C)C@H]3C4=C(CCC=C4N=C(C3C=O)OC)C                                |
| ZINC0703126  | 5.9   | -1.2              | -16.46           | 1        | 6           | 0      | 486.574         | 4              | Cc1cc(c2c(c1)scn2)N3[C@@H]1[C@@H]([C@H](C3=O)C)=O)c4cc5cccc5o4)c6ccc(cc6)C            |
| ZINC0703126  | 5.31  | -1.39             | -19.76           | 0        | 6           | 0      | 486.574         | 4              | Cc1cc(c2c(c1)scn2)N3[C@@H]1[C@@H]([C@H](C3=O)C)=O)c4cc5cccc5o4)c6ccc(cc6)C            |
| ZINC0703127  | 5.9   | -1.2              | -16.57           | 1        | 6           | 0      | 486.574         | 4              | Cc1cc(c2c(c1)scn2)N3[C@@H]1[C@@H]([C@H](C3=O)C)=O)c4cc5cccc5o4)c6ccc(cc6)C            |
| ZINC0703127  | 5.31  | -1.38             | -20.98           | 0        | 6           | 0      | 486.574         | 4              | Cc1cc(c2c(c1)scn2)N3[C@@H]1[C@@H]([C@H](C3=O)C)=O)c4cc5cccc5o4)c6ccc(cc6)C            |
| ZINC08441693 | 5.76  | 13.78             | -27.65           | 1        | 5           | 0      | 472.006         | 6              | Cc1cc(ccc1OCc2cc(se2C)C)C@H]3C4=C(CCCC4=O)NC(=C3C=O)OC)C                              |
| ZINC08441693 | 5.88  | -1.51             | -12.7            | 0        | 5           | 0      | 472.006         | 6              | Cc1cc(ccc1OCc2cc(se2C)C)C@H]3C4=C(CCC=C4N=C(C3C=O)OC)C                                |
| ZINC08441692 | 7.28  | -0.3              | -16.58           | 1        | 6           | 0      | 549.435         | 4              | Cc1cc(c2c(c1)scn2)N3[C@@H]1[C@@H]([C@H](C3=O)C)=O)c4cc5cccc5o4)c6ccc(cc6)C)C          |
| ZINC08441692 | 6.7   | -0.49             | -21.96           | 0        | 6           | 0      | 549.435         | 4              | Cc1cc(c2c(c1)scn2)N3[C@@H]1[C@@H]([C@H](C3=O)C)=O)c4cc5cccc5o4)c6ccc(cc6)C)C          |
| ZINC08441691 | 6.69  | -3.14             | -11.62           | 1        | 1           | 0      | 483.015         | 5              | [H]/N=C/1\ C@H]([C2=CCCC[C@@H]2)C@H]([C1(C#N)C#N])e3ccf(cc3C)CO4ccc(cc4C)C)C#N        |
| ZINC08441691 | 6.69  | -2.37             | -38.16           | 2        | 5           | 1      | 484.023         | 4              | Cc1cc(c1cc1COc2ccc(cc2C)C)1[C@@H]3[C@@H]4CCCC=C4)C@H]([C@H]([C@H]2+))C3(C#N)C#N)C#N   |
| ZINC08441690 | 7.28  | -0.21             | -16.56           | 1        | 6           | 0      | 549.435         | 4              | Cc1cc(c2c(c1)scn2)N3[C@@H]1[C@@H]([C@H](C3=O)C)=O)c4cc5cccc5o4)c6ccc(cc6)C)C          |
| ZINC08441690 | 6.7   | -0.39             | -21.98           | 0        | 6           | 0      | 549.435         | 4              | Cc1cc(c2c(c1)scn2)N3[C@@H]1[C@@H]([C@H](C3=O)C)=O)c4cc5cccc5o4)c6ccc(cc6)C)C          |
| ZINC08441689 | 6.69  | 3.25              | -11              | 1        | 1           | 0      | 483.015         | 5              | [H]/N=C/1\ C@H]([C2=CCCC[C@@H]2)C@H]([C1(C#N)C#N])3ccf(cc3C)CO4ccc(cc4C)C)C#N         |
| ZINC08441689 | 6.69  | 3.08              | -41.06           | 2        | 5           | 1      | 484.023         | 4              | Cc1cc(c1cc1COc2ccc(cc2C)C)1[C@@H]3[C@@H]4CCCC=C4)C@H]([C@H]([C@H]2+))C3(C#N)C#N)C#N   |
| ZINC0703124  | 6.16  | 0.74              | -15.61           | 1        | 6           | 0      | 498.535         | 4              | Cc1cc(c2c(c1)scn2)N3[C@@H]1[C@@H]([C@H](C3=O)C)=O)c4cc5cccc5o4)c6ccc(cc6)F)C          |
| ZINC0703124  | 5.58  | 0.58              | -19.18           | 0        | 6           | 0      | 498.535         | 4              | Cc1cc(c2c(c1)scn2)N3[C@@H]1[C@@H]([C@H](C3=O)C)=O)c4cc5cccc5o4)c6ccc(cc6)F)C          |
| ZINC08441688 | 6.69  | 3.2               | -10.91           | 1        | 1           | 0      | 483.015         | 5              | [H]/N=C/1\ C@H]([C2=CCCC[C@@H]2)C@H]([C1(C#N)C#N])e3ccf(cc3C)CO4ccc(cc4C)C)C#N        |
| ZINC08441688 | 6.69  | 3.03              | -40.88           | 2        | 5           | 1      | 484.023         | 4              | Cc1cc(c1cc1COc2ccc(cc2C)C)1[C@@H]3[C@@H]4CCCC=C4)C@H]([C@H]([C@H]2+))C3(C#N)C#N)C#N   |
| ZINC0703125  | 6.16  | 0.81              | -15.51           | 1        | 6           | 0      | 498.535         | 4              | Cc1cc(c2c(c1)scn2)N3[C@@H]1[C@@H]([C@H](C3=O)C)=O)c4cc5cccc5o4)c6ccc(cc6)F)C          |
| ZINC0703125  | 5.58  | 0.63              | -20.07           | 0        | 6           | 0      | 498.535         | 4              | Cc1cc(c2c(c1)scn2)N3[C@@H]1[C@@H]([C@H](C3=O)C)=O)c4cc5cccc5o4)c6ccc(cc6)F)C          |
| ZINC08441687 | 6.69  | 3.89              | -11.8            | 1        | 1           | 0      | 483.015         | 5              | [H]/N=C/1\ C@H]([C2=CCCC[C@@H]2)C@H]([C1(C#N)C#N])3ccf(cc3C)CO4ccc(cc4C)C)C#N         |
| ZINC08441687 | 6.69  | 3.69              | -32.76           | 2        | 5           | 1      | 484.023         | 4              | Cc1cc(c1cc1COc2ccc(cc2C)C)1[C@@H]3[C@@H]4CCCC=C4)C@H]([C@H]([C@H]2+))C3(C#N)C#N)C#N   |
| ZINC08441686 | 6.78  | -0.7              | -16.99           | 1        | 6           | 0      | 559.441         | 4              | Cc1cc(c2c(c1)scn2)N3[C@@H]1[C@@H]([C@H](C3=O)C)=O)c4cc5cccc5o4)c6ccc(cc6)Br)C         |
| ZINC08441686 | 6.2   | -0.9              | -22.03           | 0        | 6           | 0      | 559.441         | 4              | Cc1cc(c2c(c1)scn2)N3[C@@H]1[C@@H]([C@H](C3=O)C)=O)c4cc5cccc5o4)c6ccc(cc6)Br)C         |
| ZINC08441685 | 6.78  | -0.78             | -14.56           | 1        | 6           | 0      | 559.441         | 4              | Cc1cc(c2c(c1)scn2)N3[C@@H]1[C@@H]([C@H](C3=O)C)=O)c4cc5cccc5o4)c6ccc(cc6)Br)C         |
| ZINC08441685 | 6.2   | -0.95             | -18.15           | 0        | 6           | 0      | 559.441         | 4              | Cc1cc(c2c(c1)scn2)N3[C@@H]1[C@@H]([C@H](C3=O)C)=O)c4cc5cccc5o4)c6ccc(cc6)Br)C         |
| ZINC08441684 | 6.12  | 14.09             | -22.01           | 1        | 5           | 0      | 530.484         | 6              | Cc1cc(ccs1)[C@@H]2C3=C(C)C(C3=O)C)C)NC(=C2C(=O)OC)C)CO4ccc4Br                         |
| ZINC08441684 | 6.23  | -1.4              | -11.96           | 0        | 5           | 0      | 530.484         | 6              | Cc1cc(ccs1)[C@@H]2C3=C(C)C(C3=O)C)C)NC(=C2C(=O)OC)C)CO4ccc4Br                         |
| ZINC08441683 | 6.45  | 0.32              | -15.99           | 1        | 6           | 0      | 494.572         | 4              | Cc1ccc(cc1)[C@@H]2[C@H](C(=O)N2c3nc4c(ccc4s3)C)C)O[C@H]3C4=C(CCC=C4N=C(C3C=O)OC)C     |
| ZINC08441683 | 5.86  | 0.16              | -19.05           | 0        | 6           | 0      | 494.572         | 4              | Cc1ccc(cc1)[C@@H]2[C@H]([C@H](C(=O)N2c3nc4c(ccc4s3)C)C)C)C(=O)c5cc6cccc6o5            |
| ZINC08441682 | 6.45  | 0.39              | -15.94           | 1        | 6           | 0      | 494.572         | 4              | Cc1ccc(cc1)[C@@H]2[C@H](C(=O)N2c3nc4c(ccc4s3)C)C)O[C@H]3C4=C(CCC=C4N=C(C3C=O)OC)C     |
| ZINC08441682 | 5.86  | 0.21              | -19.97           | 0        | 6           | 0      | 494.572         | 4              | Cc1ccc(cc1)[C@@H]2[C@H]([C@H](C(=O)N2c3nc4c(ccc4s3)C)C)C)C(=O)c5cc6cccc6o5            |
| ZINC08441681 | 6.12  | 14.08             | -21.99           | 1        | 5           | 0      | 530.484         | 6              | Cc1cc(ccs1)[C@@H]2C3=C(C)C(C3=O)C)C)NC(=C2C(=O)OC)C)CO4ccc4Br                         |
| ZINC08441681 | 6.23  | -1.56             | -11.35           | 0        | 5           | 0      | 530.484         | 6              | Cc1cc(ccs1)[C@@H]2C3=C(C)C(C3=O)C)C)NC(=C2C(=O)OC)C)CO4ccc4Br                         |
| ZINC08441680 | 6.68  | -0.15             | -15.25           | 1        | 6           | 0      | 514.99          | 4              | Cc1cc(c2c(c1)scn2)N3[C@@H]1[C@@H]([C@H](C3=O)C)=O)c4cc5cccc5o4)c6ccc(cc6)C)C          |
| ZINC08441680 | 6.09  | -0.31             | -18.75           | 0        | 6           | 0      | 514.99          | 4              | Cc1cc(c2c(c1)scn2)N3[C@@H]1[C@@H]([C@H](C3=O)C)=O)c4cc5cccc5o4)c6ccc(cc6)C)C          |
| ZINC08441679 | 6.68  | -0.08             | -15.14           | 1        | 6           | 0      | 514.99          | 4              | Cc1cc(c2c(c1)scn2)N3[C@@H]1[C@@H]([C@H](C3=O)C)=O)c4cc5cccc5o4)c6ccc(cc6)C)C          |
| ZINC08441679 | 6.09  | -0.26             | -19.61           | 0        | 6           | 0      | 514.99          | 4              | Cc1cc(c2c(c1)scn2)N3[C@@H]1[C@@H]([C@H](C3=O)C)=O)c4cc5cccc5o4)c6ccc(cc6)C)C          |
| ZINC0703122  | 6     | 0.08              | -16.06           | 1        | 6           | 0      | 480.545         | 4              | Cc1cc(c2c(c1)scn2)N3[C@@H]1[C@@H]([C@H](C3=O)C)=O)c4cc5cccc5o4)c6ccc(cc6)C            |
| ZINC0703122  | 5.41  | -0.09             | -19.28           | 0        | 6           | 0      | 480.545         | 4              | Cc1cc(c2c(c1)scn2)N3[C@@H]1[C@@H]([C@H](C3=O)C)=O)c4cc5cccc5o4)c6ccc(cc6)C            |
| ZINC08441678 | 6.09  | 0.21              | -10.92           | 1        | 0           | 0      | 486.033         | 5              | CCOC(=O)C1[C@@H]([C2=C(CCCC2=O)N=C1)C]c3cc(c(s3)C)CO4ccc(cc4C)C                       |
| ZINC08441678 | 6.27  | -1                | -11.88           | 0        | 5           | 0      | 486.033         | 7              | CCOC(=O)C1[C@@H]([C2=C(NC1=C)CCC2=O)c3cc(c(s3)C)CO4ccc(cc4C)C                         |
| ZINC08441678 | 6.09  | -0.07             | -14.36           | 0        | 5           | 0      | 486.033         | 7              | CCOC(=O)C1=C(N=C2CCCC(=O)C2)C@H]1e3ccf(cc3)C)CO4ccc(cc4C)C                            |
| ZINC0703123  | 6     | -0.02             | -16.14           | 1        | 6           | 0      | 480.545         | 4              | Cc1cc(c2c(c1)scn2)N3[C@@H]1[C@@H]([C@H](C3=O)C)=O)c4cc5cccc5o4)c6ccc(cc6)C            |
| ZINC0703123  | 5.41  | -0.19             | -20.26           | 0        | 6           | 0      | 480.545         | 4              | Cc1cc(c2c(c1)scn2)N3[C@@H]1[C@@H]([C@H](C3=O)C)=O)c4cc5cccc5o4)c6ccc(cc6)C            |
| ZINC08441677 | 6.09  | 0.2               | -10.79           | 1        | 0           | 0      | 486.033         | 5              | CCOC(=O)C1[C@@H]([C2=C(CCCC2=O)N=C1)C]c3ccf(cc3)C)CO4ccc(cc4C)C                       |



**Supplementary Table S2:**  
**Detailed table of XP Docking using Schrodinger's Glide module**

| ZINC_ID      | xtLogP | ApolarDesolvation | PolarDesolvation | H Donors | H Acceptors | Charge | MolecularWeight | RotatableBonds | SMILES                                                                         |
|--------------|--------|-------------------|------------------|----------|-------------|--------|-----------------|----------------|--------------------------------------------------------------------------------|
| ZINC08441660 | 6.63   | 0.29              | -18.19           | 0        | 8           | 0      | 582.678         | 10             | CCCCCoc1ccc(cc1)C@H]2[C@H](C(=O)N)2c3nc4ccc(cc4s3)C(C(=O)c5ccc6cccc6o5         |
| ZINC00881526 | 2.58   | -4.1              | -21.64           | 2        | 7           | 0      | 435.933         | 7              | COC1ccc(cc1)C(=O)NC(=S)Nc2ccc(c2)C1N3CCOC3                                     |
| ZINC00881519 | 3.75   | -2.73             | -25.71           | 2        | 8           | 0      | 463.515         | 8              | COC1ccc(cc1)c2nc3ccc(ccc3o2)NC(=S)NC(=O)c4ccc(c4)OC]OC                         |
| ZINC00881512 | 4.54   | -2.43             | -31.11           | 2        | 7           | 0      | 461.543         | 7              | Cc1ccc(cc1)C]c2nc3ccc(ccc3o2)NC(=S)NC(=O)c4ccc(c4)OC]OC                        |
| ZINC00703112 | 5.52   | 11.73             | -58.51           | 0        | 6           | -1     | 471.539         | 4              | Cc1ccc2c(c1)sc(n2)N3[C@H]([C(=C(C3=O)O-])C(=O)c4ccc5cccc5o4)c6cccc6            |
| ZINC08441659 | 7.45   | 2.32              | -8.73            | 2        | 0           | 0      | 522.085         | 5              | CCOC(=O)C1[C@H](C2=C(C(C(C2=O)(C)C)N=C1C)C)C]c3ccc(c3)C]C]OC4ccc(cc4)C]C       |
| ZINC08441659 | 7.63   | 0.9               | -10.05           | 0        | 5           | 0      | 522.085         | 7              | CCOC(=O)C1[C@H](C2C(=NC1=C)CC(C2=O)(C)C)C]c3ccc(c3)C]C]OC4ccc(cc4)C]C          |
| ZINC08441659 | 7.45   | 2.15              | -12.06           | 0        | 5           | 0      | 522.085         | 7              | CCOC(=O)C1=C(N=C2CC(C(C(=O)C2)C@H]1c3ccc(c3)C]C]OC4ccc(cc4)C]C]C]C             |
| ZINC00881510 | 3.77   | -2.72             | -24.5            | 2        | 8           | 0      | 463.515         | 8              | COC1ccc(cc1)c2nc3ccc(ccc3o2)NC(=S)NC(=O)c4ccc(c4)OC]OC                         |
| ZINC00881507 | 4.16   | -2.43             | -24.04           | 2        | 7           | 0      | 447.516         | 7              | Cc1ccc(cc1)c2nc3ccc(ccc3o2)NC(=S)NC(=O)c4ccc(c4)OC]OC                          |
| ZINC00703113 | 5.52   | 11.74             | -58.77           | 0        | 6           | -1     | 471.539         | 4              | Cc1ccc2c(c1)sc(n2)N3[C@H]([C(=C(C3=O)O-])C(=O)c4ccc5cccc5o4)c6cccc6            |
| ZINC00881505 | 4.14   | -2.44             | -30.73           | 2        | 7           | 0      | 447.516         | 7              | Cc1ccc(cc1)c2nc3ccc(ccc3o2)NC(=S)NC(=O)c4ccc(c4)OC]OC                          |
| ZINC00881503 | 4.12   | -2.75             | -31.36           | 2        | 7           | 0      | 447.516         | 7              | Cc1ccc(cc1)c2nc3ccc(ccc3o2)NC(=S)NC(=O)c4ccc(c4)OC]OC                          |
| ZINC08441658 | 6.12   | 13.57             | -22.37           | 1        | 5           | 0      | 504.023         | 6              | Cc1c(ccs1)[C@H]2C3=C(C)C(C3=O)(C)C]NC(=C2(=O)OC)C]OC4ccc(cc4)F                 |
| ZINC08441658 | 6.24   | -0.08             | -11.7            | 0        | 5           | 0      | 504.023         | 6              | Cc1c(ccs1)[C@H]2C3C(=O)CC(C=C3N=C(C2(=O)OC)C]C]OC4ccc(cc4)F                    |
| ZINC00881501 | 4.39   | -2.91             | -2.3             | 2        | 7           | 0      | 467.934         | 7              | COC1ccc(cc1)C(=O)NC(=S)Nc2ccc3c(c2)nc(o3)c4ccc(cc4)Cl                          |
| ZINC08441657 | 6.43   | -1.2              | -12.38           | 1        | 6           | 0      | 545.414         | 4              | Cc1ccc2c(c1)sc(n2)N3[C@H]([C(=C(C3=O)O)C(=O)c4ccc5cccc5o4)c6ccc(cc6)Br         |
| ZINC08441657 | 5.85   | -1.36             | -14              | 0        | 6           | 0      | 545.414         | 4              | Cc1ccc2c(c1)sc(n2)N3[C@H]([C(=C(C3=O)O)C(=O)c4ccc5cccc5o4)c6ccc(cc6)Br         |
| ZINC00881495 | 3.13   | -0.28             | -30.08           | 2        | 9           | 0      | 477.546         | 8              | Cc1ccc(cc1)Nc2nc3ccc(ccc3o2)NC(=S)NC(=O)c4ccc(c4)OC]OC                         |
| ZINC00881493 | 3.52   | 0.02              | -30.11           | 2        | 8           | 0      | 461.547         | 7              | Cc1ccc(cc1)n2nc3ccc(ccc3n2)NC(=S)NC(=O)c4ccc(c4)OC]OC                          |
| ZINC08441656 | 6.43   | -1.15             | -12.45           | 1        | 6           | 0      | 545.414         | 4              | Cc1ccc2c(c1)sc(n2)N3[C@H]([C(=C(C3=O)O)C(=O)c4ccc5cccc5o4)c6ccc(cc6)Br         |
| ZINC08441656 | 5.85   | -1.32             | -15.07           | 0        | 6           | 0      | 545.414         | 4              | Cc1ccc2c(c1)sc(n2)N3[C@H]([C(=C(C3=O)O)C(=O)c4ccc5cccc5o4)c6ccc(cc6)Br         |
| ZINC00881491 | 3.13   | -0.79             | -30.25           | 2        | 9           | 0      | 477.546         | 9              | CCOC1ccc(cc1)n2nc3ccc(ccc3n2)NC(=S)NC(=O)c4ccc(c4)OC]OC                        |
| ZINC08441655 | 6.12   | 13.56             | -22.46           | 1        | 5           | 0      | 504.023         | 6              | Cc1c(ccs1)[C@H]2C3=C(C)C(C3=O)(C)C]NC(=C2(=O)OC)C]OC4ccc(cc4)F                 |
| ZINC08441655 | 6.24   | -0.09             | -11.8            | 0        | 5           | 0      | 504.023         | 6              | Cc1c(ccs1)[C@H]2C3C(=O)CC(C=C3N=C(C2(=O)OC)C]C]OC4ccc(cc4)F                    |
| ZINC08441654 | 6.91   | -0.66             | -13.29           | 1        | 6           | 0      | 535.408         | 4              | Cc1ccc2c(c1)sc(n2)N3[C@H]([C(=C(C3=O)O)C(=O)c4ccc5cccc5o4)c6ccc(cc6)Cl         |
| ZINC08441654 | 6.32   | -0.83             | -15.6            | 0        | 6           | 0      | 535.408         | 4              | Cc1ccc2c(c1)sc(n2)N3[C@H]([C(=C(C3=O)O)C(=O)c4ccc5cccc5o4)c6ccc(cc6)Cl         |
| ZINC00881486 | 3.15   | -0.5              | -30.89           | 2        | 8           | 0      | 447.52          | 7              | Cc1ccc(cc1)n2nc3ccc(ccc3n2)NC(=S)NC(=O)c4ccc(c4)OC]OC                          |
| ZINC00881484 | 2.7    | -0.82             | -31.33           | 2        | 8           | 0      | 433.493         | 7              | COC1ccc(cc1)C(=O)NC(=S)Nc2ccc3c(c2)nn(n3)c4ccc4                                |
| ZINC00328721 | 4.03   | -0.13             | -18.58           | 0        | 2           | 0      | 312.438         | 3              | Cc1ccc(cc1)C(=O)NC(=S)Nc2ccc(c2)C]C                                            |
| ZINC08441653 | 6.01   | 10.13             | -16              | 2        | 5           | 0      | 360.889         | 10             | CCCCCCCC(=O)N/N=C/c1c[nH]n1c2ccc(cc2)Cl                                        |
| ZINC08441652 | 6.91   | -0.71             | -13.4            | 1        | 6           | 0      | 535.408         | 4              | Cc1ccc2c(c1)sc(n2)N3[C@H]([C(=C(C3=O)O)C(=O)c4ccc5cccc5o4)c6ccc(cc6)Cl         |
| ZINC08441652 | 6.32   | -0.87             | -15.78           | 0        | 6           | 0      | 535.408         | 4              | Cc1ccc2c(c1)sc(n2)N3[C@H]([C(=C(C3=O)O)C(=O)c4ccc5cccc5o4)c6ccc(cc6)Cl         |
| ZINC00881458 | 4.7    | -1.61             | -28.87           | 3        | 5           | 0      | 437.952         | 6              | Cc1ccc(cc1)C(=O)NC(=S)Nc2ccc(c2)NC(=O)c3ccc3Cl                                 |
| ZINC00881427 | 3.57   | -2.12             | -18.34           | 2        | 4           | 0      | 425.295         | 5              | CN(C)C1ccc(cc1)NC(=S)NC(=O)c2ccc(cc2)1                                         |
| ZINC08441651 | 7.37   | -0.21             | -17.41           | 1        | 2           | 0      | 386.515         | 5              | CCCCCCCCCCCC(=O)N/N=C/c1c[nH]n1c2ccc(cc2)F                                     |
| ZINC00703110 | 5.62   | -0.44             | -13.37           | 1        | 6           | 0      | 466.518         | 4              | Cc1ccc2c(c1)sc(n2)N3[C@H]([C(=C(C3=O)O)C(=O)c4ccc5cccc5o4)c6ccc(cc6            |
| ZINC00703110 | 5.04   | -0.6              | -14.6            | 0        | 6           | 0      | 466.518         | 4              | Cc1ccc2c(c1)sc(n2)N3[C@H]([C(=C(C3=O)O)C(=O)c4ccc5cccc5o4)c6ccc(cc6            |
| ZINC08441650 | 3.42   | -1.66             | -21.66           | 2        | 6           | 0      | 427.223         | 5              | c1ccc(cc1)C(=O)NC(=S)Nc2ccc(cc2)N+=[O-]O-11                                    |
| ZINC06194338 | 3.3    | -1.13             | -20.76           | 2        | 6           | 0      | 441.25          | 5              | Cc1ccc(cc1)NC(=S)NC(=O)c2ccc(cc2)N+=[O-]O-1                                    |
| ZINC00881405 | 2.89   | -1.41             | -18.38           | 3        | 9           | 0      | 463.49          | 8              | Cc1ccc(cc1)C(=O)NC(=S)Nc2ccc(cc2)C(=O)Nc3ccc(cc3)OC]OC                         |
| ZINC07077628 | 3.24   | 11.18             | -21.99           | 1        | 5           | 0      | 360.442         | 4              | C/C(=N)NC(=O)c1csc2c1ccc2)/c3ccc(cc3)n4ccc4                                    |
| ZINC07077628 | 3.24   | 11.66             | -51.21           | 2        | 5           | 1      | 361.45          | 4              | C/C(=N)NC(=O)c1csc2c1ccc2)/c3ccc(cc3)n4ccc4                                    |
| ZINC00703111 | 5.62   | -0.37             | -13.3            | 1        | 6           | 0      | 466.518         | 4              | Cc1ccc2c(c1)sc(n2)N3[C@H]([C(=C(C3=O)O)C(=O)c4ccc5cccc5o4)c6ccc(cc6            |
| ZINC00703111 | 5.04   | -0.55             | -15.49           | 0        | 6           | 0      | 466.518         | 4              | Cc1ccc2c(c1)sc(n2)N3[C@H]([C(=C(C3=O)O)C(=O)c4ccc5cccc5o4)c6ccc(cc6            |
| ZINC08441648 | 2.58   | -1.74             | -51.53           | 1        | 10          | 1      | 463.536         | 7              | Cc1ccc(cc1)N+=[O-]O-1S(=O)(=O)N(C(=O)N2CC(C)N+=[O-]O-1)C]C]OC3ccc(cc3)OC       |
| ZINC15952846 | 3.57   | 9.76              | -60.31           | 0        | 7           | -1     | 462.522         | 7              | CCOC1ccc(cc1)[C@H]2C(=C(C(=O)N2)C]C@H]3CCOC3]O-1]C(=O)c4ccc5c(c4)C]C@H](O5)C   |
| ZINC08441645 | 4.91   | -1.59             | -18.81           | 1        | 9           | 0      | 469.519         | 8              | Cc1ccc1NC(=O)CN(c2ccc(cc2)OC)S(=O)(=O)c3ccc(cc3)N+=[O-]O-11                    |
| ZINC00878804 | 4.44   | 3                 | -22.45           | 1        | 8           | 0      | 418.405         | 8              | C]C@H]([C(=O)c1cccc1)OC(=O)c2ccc(cc2)NC(=O)c3ccc(cc3)N+=[O-]O-1                |
| ZINC15952847 | 3.57   | 9.72              | -66.76           | 0        | 7           | -1     | 462.522         | 7              | CCOC1ccc(cc1)[C@H]2C(=C(C(=O)N2)C]C@H]3CCOC3]O-1]C(=O)c4ccc5c(c4)C]C@H](O5)C   |
| ZINC00878803 | 4.44   | 3                 | -22.78           | 1        | 8           | 0      | 418.405         | 8              | C]C@H]([C(=O)c1cccc1)OC(=O)c2ccc(cc2)NC(=O)c3ccc(cc3)N+=[O-]O-1                |
| ZINC00878801 | 4.47   | 2.99              | -18.29           | 1        | 8           | 0      | 418.405         | 8              | C]C@H]([C(=O)c1cccc1)OC(=O)c2ccc(cc2)NC(=O)c3ccc(cc3)N+=[O-]O-1                |
| ZINC15952844 | 3.57   | 9.69              | -64.65           | 0        | 7           | -1     | 462.522         | 7              | CCOC1ccc(cc1)[C@H]2C(=C(C(=O)N2)C]C@H]3CCOC3]O-1]C(=O)c4ccc5c(c4)C]C@H](O5)C   |
| ZINC00878799 | 4.47   | 2.99              | -18.21           | 1        | 8           | 0      | 418.405         | 8              | C]C@H]([C(=O)c1cccc1)OC(=O)c2ccc(cc2)NC(=O)c3ccc(cc3)N+=[O-]O-1                |
| ZINC08441642 | 4.42   | 3.95              | -12.42           | 0        | 9           | 0      | 444.399         | 7              | C]C@H]([C(=O)c1cccc1)OC(=O)c2ccc3c(c2)C(=O)N(C3=O)c4ccc(cc4)N+=[O-]O-1         |
| ZINC08441641 | 4.42   | 3.95              | -12.5            | 0        | 9           | 0      | 444.399         | 7              | C]C@H]([C(=O)c1cccc1)OC(=O)c2ccc3c(c2)C(=O)N(C3=O)c4ccc(cc4)N+=[O-]O-1         |
| ZINC00971825 | 4.26   | 4.3               | -20.74           | 0        | 9           | 0      | 444.399         | 7              | C]C@H]([C(=O)c1cccc1)OC(=O)c2ccc(c2)N3C(=O)c4ccc(cc4)N+=[O-]O-1                |
| ZINC15952845 | 3.57   | 9.25              | -66.48           | 0        | 7           | -1     | 462.522         | 7              | CCOC1ccc(cc1)[C@H]2C(=C(C(=O)N2)C]C@H]3CCOC3]O-1]C(=O)c4ccc5c(c4)C]C@H](O5)C   |
| ZINC00971824 | 4.26   | 4.3               | -20.91           | 0        | 9           | 0      | 444.399         | 7              | C]C@H]([C(=O)c1cccc1)OC(=O)c2ccc(c2)N3C(=O)c4ccc(cc4)N+=[O-]O-1                |
| ZINC00971823 | 4.6    | 3.95              | -14.94           | 0        | 9           | 0      | 444.399         | 7              | C]C@H]([C(=O)c1cccc1)OC(=O)c2ccc3c(c2)C(=O)N(C3=O)c4ccc(cc4)N+=[O-]O-1         |
| ZINC08441639 | 6.14   | 3.39              | -15.09           | 2        | 0           | 0      | 538.572         | 9              | CCOC(=O)C]C@H](C2=C(C)C(C2=O)(C)C]N=C1C)c3ccc(cc3)C]OC4ccc(cc4)N+=[O-]O-1)F]OC |

Supplementary Table S2:

Detailed table of XP Docking using Schrodinger's Glide module

| ZINC_ID      | xLogP | ApolarDesolvation | PolarDesolvation | H Donors | H Acceptors | Charge | MolecularWeight | RotatableBonds | SMILES                                                                              |
|--------------|-------|-------------------|------------------|----------|-------------|--------|-----------------|----------------|-------------------------------------------------------------------------------------|
| ZINC08441639 | 6.14  | 3.37              | -17.75           | 0        | 9           | 0      | 538.572         | 9              | CCOC(=O)C1=C(N=C2CC(C(=O)C2)[C@H]1c3ccc(c3)COC4ccc(cc4)N+][=O]O-]F)OC(C)C           |
| ZINC08441639 | 6.33  | 2.45              | -15.42           | 0        | 9           | 0      | 538.572         | 9              | CCOC(=O)C1[C@@H](C2C=NC1=C)CC(C2=O)(C)C3ccc(c3)COC4ccc(cc4)N+][=O]O-]F)OC           |
| ZINC00971822 | 4.6   | 3.95              | -15              | 0        | 9           | 0      | 444.399         | 7              | C[C@@H](C(=O)c1cccc1)OC(=O)c2ccc3c(c2)C(=O)N(C3=O)c4cccc(c4)N+][=O]O-               |
| ZINC08441638 | 3.85  | -1.01             | -15.94           | 1        | 9           | 0      | 537.609         | 11             | CCCCCoc1ccc(cc1OC)[C@H]2C(=C(C(=O)N2C[C@H]3CCC03)C(=O)c4ccc5c(c4)OCCO5              |
| ZINC08441638 | 3.27  | -1.17             | -19.82           | 0        | 9           | 0      | 537.609         | 11             | CCCCCoc1ccc(cc1OC)[C@H]2[C@@H](C(=O)C(=O)N2C[C@H]3CCC03)C(=O)c4ccc5c(c4)OCCO5       |
| ZINC00971821 | 4.08  | 4.3               | -20.35           | 0        | 9           | 0      | 444.399         | 7              | C[C@H](C(=O)c1cccc1)OC(=O)c2ccc(cc2)N3C(=O)c4ccc(c4C3=O)N+][=O]O-                   |
| ZINC02998601 | 4.08  | 4.3               | -20.45           | 0        | 9           | 0      | 444.399         | 7              | C[C@@H](C(=O)c1cccc1)OC(=O)c2ccc(cc2)N3C(=O)c4ccc(c4C3=O)N+][=O]O-                  |
| ZINC00971818 | 3.98  | 4.72              | -21.89           | 0        | 10          | 0      | 488.452         | 10             | COC1ccc(cc1)C(=O)COC(=O)[C@H]([C2c2ccc2)N3C(=O)c4ccc(c4C3=O)N+][=O]O-               |
| ZINC08441637 | 3.85  | -0.83             | -17.97           | 1        | 9           | 0      | 537.609         | 11             | CCCCCoc1ccc(cc1OC)[C@H]2C(=C(C(=O)N2C[C@H]3CCC03)C(=O)c4ccc5c(c4)OCCO5              |
| ZINC08441637 | 3.27  | -0.93             | -23.6            | 0        | 9           | 0      | 537.609         | 11             | CCCCCoc1ccc(cc1OC)[C@H]2[C@@H](C(=O)C(=O)N2C[C@H]3CCC03)C(=O)c4ccc5c(c4)OCCO5       |
| ZINC08441636 | 6.14  | 3.41              | -14.96           | 2        | 0           | 0      | 538.572         | 9              | CCOC(=O)C1[C@H](C2=C(C(=O)C)CC(C2=O)(C)C)C3ccc(c3)COC4ccc(cc4)N+][=O]O-]F)OC        |
| ZINC08441636 | 6.33  | 2.14              | -15.2            | 0        | 9           | 0      | 538.572         | 9              | CCOC(=O)C1[C@H](C2C=NC1=C)CC(C2=O)(C)C3ccc(c3)COC4ccc(cc4)N+][=O]O-]F)OC            |
| ZINC08441636 | 6.14  | 3.04              | -17.51           | 0        | 9           | 0      | 538.572         | 9              | CCOC(=O)C1=C(N=C2CC(C(=O)C2)[C@H]1c3ccc(c3)COC4ccc(cc4)N+][=O]O-]F)OC(C)C           |
| ZINC00971817 | 3.98  | 4.71              | -21.85           | 0        | 10          | 0      | 488.452         | 10             | COC1ccc(cc1)C(=O)COC(=O)[C@H]([C2c2ccc2)N3C(=O)c4ccc(c4C3=O)N+][=O]O-               |
| ZINC08441635 | 3.85  | -1.04             | -19.56           | 1        | 9           | 0      | 537.609         | 11             | CCCCCoc1ccc(cc1OC)[C@H]2C(=C(C(=O)N2C[C@H]3CCC03)C(=O)c4ccc5c(c4)OCCO5              |
| ZINC08441635 | 3.27  | -1.21             | -25.75           | 0        | 9           | 0      | 537.609         | 11             | CCCCCoc1ccc(cc1OC)[C@H]2[C@@H](C(=O)C(=O)N2C[C@H]3CCC03)C(=O)c4ccc5c(c4)OCCO5       |
| ZINC00971816 | 4.37  | 5.01              | -20.97           | 0        | 9           | 0      | 472.453         | 9              | C1ccc(cc1)C(=O)COC(=O)[C@H]([C2c2ccc2)N3C(=O)c4ccc(c4C3=O)N+][=O]O-                 |
| ZINC00971815 | 4.37  | 4.99              | -20.91           | 0        | 9           | 0      | 472.453         | 9              | C1ccc(cc1)C(=O)COC(=O)[C@H]([C2c2ccc2)N3C(=O)c4ccc(c4C3=O)N+][=O]O-                 |
| ZINC00971812 | 3.92  | 4.67              | -21.07           | 0        | 9           | 0      | 458.426         | 9              | c1ccc(cc1)C[C@H](C(=O)OC(=O)c2ccc2)N3C(=O)c4ccc(c4C3=O)N+][=O]O-                    |
| ZINC08441634 | 3.85  | -1.35             | -20.05           | 1        | 9           | 0      | 537.609         | 11             | CCCCCoc1ccc(cc1OC)[C@H]2C(=C(C(=O)N2C[C@H]3CCC03)C(=O)c4ccc5c(c4)OCCO5              |
| ZINC08441634 | 3.27  | -1.43             | -28.34           | 0        | 9           | 0      | 537.609         | 11             | CCCCCoc1ccc(cc1OC)[C@H]2[C@@H](C(=O)C(=O)N2C[C@H]3CCC03)C(=O)c4ccc5c(c4)OCCO5       |
| ZINC08441633 | 5.77  | 3.02              | -14.78           | 2        | 0           | 0      | 524.545         | 9              | CC1=NC2=C([C@@H](C1C(=O)OC)C3ccc(c3)COC4ccc(cc4)N+][=O]O-]F)OC(C)C(C)C              |
| ZINC08441633 | 5.77  | 3.15              | -18.27           | 0        | 9           | 0      | 524.545         | 8              | CC1=C([C@@H]([C@H]2C(=N1)CC(C2=O)(C)C)C3ccc(c3)COC4ccc(cc4)N+][=O]O-]F)OC(C)C       |
| ZINC08441633 | 5.95  | 3.11              | -15.58           | 0        | 9           | 0      | 524.545         | 8              | CC1(CC2=NC=C)C[C@H]([C2C(=O)C]1)c3ccc(c3)COC4ccc(cc4)N+][=O]O-]F)OC(C)C(=O)OC       |
| ZINC08441633 | 5.95  | 4.18              | -15.27           | 0        | 9           | 0      | 524.545         | 8              | CC1(CC2=NC=C)C[C@H]([C@H]2C(=O)C)1c3ccc(c3)COC4ccc(cc4)N+][=O]O-]F)OC(C)C(=O)OC     |
| ZINC00971811 | 3.92  | 4.68              | -21.09           | 0        | 9           | 0      | 458.426         | 9              | c1ccc(cc1)C[C@H]([C(=O)OC(=O)c2ccc2)N3C(=O)c4ccc(c4C3=O)N+][=O]O-                   |
| ZINC00703105 | 2.16  | 7.84              | -58.06           | 0        | 7           | -1     | 426.47          | 5              | c1ccc(sc1)[C@H]2C(=C(C(=O)N2C[C@H]3CCC03)O)C(=O)c4ccc5c(c4)OCCO5                    |
| ZINC00703105 | 2.6   | -3.4              | -25.85           | 1        | 7           | 0      | 427.478         | 4              | c1ccc(sc1)[C@H]2C(=C(C(=O)N2C[C@H]3CCC03)O)C(=O)c4ccc5c(c4)OCCO5                    |
| ZINC00703105 | 1.58  | -3.11             | -19.28           | 0        | 7           | 0      | 427.478         | 5              | c1ccc(sc1)[C@H]2[C@@H](C(=O)C(=O)N2C[C@H]3CCC03)C(=O)c4ccc5c(c4)OCCO5               |
| ZINC00878068 | 4.48  | -2.28             | -26.76           | 2        | 8           | 0      | 432.461         | 6              | Cc1ccc2c(c1)nc(o2)c3ccc(cc3)N(C(=O)N)C(=O)c4ccc(cc4)N+][=O]O-                       |
| ZINC02064361 | 3.76  | 6.76              | -32.42           | 3        | 9           | 0      | 434.433         | 6              | Cc1ccc2c(c1)nc(o2)c3cc(cc3)N(C(=O)N)C(=O)c4ccc(cc4)N+][=O]O-                        |
| ZINC00878066 | 4.43  | -2.07             | -29.99           | 2        | 8           | 0      | 432.461         | 6              | Cc1ccc(cc1)N(C(=O)N)C(=O)c2ccc(cc2)N+][=O]O-]c3nc4ccc4o3                            |
| ZINC00878064 | 4.83  | -1.7              | -23.93           | 2        | 8           | 0      | 446.488         | 6              | Cc1ccc2c(c1)nc(o2)c3ccc(cc3)N(C(=O)N)C(=O)c4ccc(cc4)N+][=O]O-                       |
| ZINC00703106 | 2.16  | 7.71              | -62.02           | 0        | 7           | -1     | 426.47          | 5              | c1ccc(sc1)[C@H]2C(=C(C(=O)N2C[C@H]3CCC03)O)C(=O)c4ccc5c(c4)OCCO5                    |
| ZINC00703106 | 2.6   | -2.74             | -26.69           | 1        | 7           | 0      | 427.478         | 4              | c1ccc(sc1)[C@H]2C(=C(C(=O)N2C[C@H]3CCC03)O)C(=O)c4ccc5c(c4)OCCO5                    |
| ZINC00703106 | 1.58  | -2.47             | -23.15           | 0        | 7           | 0      | 427.478         | 5              | c1ccc(sc1)[C@H]2[C@@H](C(=O)C(=O)N2C[C@H]3CCC03)C(=O)c4ccc5c(c4)OCCO5               |
| ZINC08441632 | 3.5   | -2.71             | -27.02           | 2        | 9           | 0      | 433.449         | 6              | Cc1c(ccc1)N(C(=O)N)C(=O)c2ccc(cc2)N+][=O]O-]c3nc4cc4o3                              |
| ZINC00703107 | 2.16  | 8.33              | -57.27           | 0        | 7           | -1     | 426.47          | 5              | c1ccc(sc1)[C@H]2C(=C(C(=O)N2C[C@H]3CCC03)O)C(=O)c4ccc5c(c4)OCCO5                    |
| ZINC00703107 | 2.6   | -3.54             | -30.49           | 1        | 7           | 0      | 427.478         | 4              | c1ccc(sc1)[C@H]2C(=C(C(=O)N2C[C@H]3CCC03)O)C(=O)c4ccc5c(c4)OCCO5                    |
| ZINC00703107 | 1.58  | -3.34             | -23.22           | 0        | 7           | 0      | 427.478         | 5              | c1ccc(sc1)[C@H]2[C@@H](C(=O)C(=O)N2C[C@H]3CCC03)C(=O)c4ccc5c(c4)OCCO5               |
| ZINC00878058 | 3.83  | 0.17              | -29.51           | 2        | 9           | 0      | 446.492         | 6              | Cc1ccc(cc1)n2nc3cc(c(c3n2)N(C(=O)N)C(=O)c4ccc(cc4)N+][=O]O-]C                       |
| ZINC00878056 | 3.39  | -0.15             | -29.91           | 2        | 9           | 0      | 432.465         | 6              | Cc1ccc2c(c1)N(C(=O)N)C(=O)c3ccc(cc3)N+][=O]O-]nm(m2)c4ccc4                          |
| ZINC00878053 | 3.01  | -0.67             | -30.7            | 2        | 9           | 0      | 418.438         | 6              | c1ccc(cc1)n2nc3ccc(cc3n2)N(C(=O)N)C(=O)c4ccc(cc4)N+][=O]O-                          |
| ZINC02064359 | 4.06  | -2.59             | -30.62           | 2        | 9           | 0      | 448.46          | 7              | COC1ccc(c1)c2nc3ccc(cc3o2)N(C(=O)N)C(=O)c4ccc(cc4)N+][=O]O-                         |
| ZINC00878051 | 4.19  | -1.88             | -23.08           | 2        | 8           | 0      | 436.424         | 6              | c1ccc(cc1)c2nc3cc(c(c3o2)N(C(=O)N)C(=O)c4ccc(cc4)N+][=O]O-]F                        |
| ZINC08441631 | 5.77  | 3.13              | -14.88           | 2        | 0           | 0      | 524.545         | 9              | CC1=NC2=NC([C@H](C1C(=O)OC)C3ccc(c3)COC4ccc(cc4)N+][=O]O-]F)OC(C(=O)CC(C2)C)C       |
| ZINC08441631 | 5.95  | 3.19              | -15.16           | 0        | 9           | 0      | 524.545         | 8              | CC1(CC2=NC=C)C[C@H]([C2C(=O)C]1)c3ccc(c3)COC4ccc(cc4)N+][=O]O-]F)OC(C)C(=O)OC       |
| ZINC08441631 | 5.95  | 4.35              | -17.15           | 0        | 9           | 0      | 524.545         | 8              | CC1(CC2=NC=C)C[C@H]([C@H]2C(=O)C)1c3ccc(c3)COC4ccc(cc4)N+][=O]O-]F)OC(C)C(=O)OC     |
| ZINC08441631 | 5.77  | 3.08              | -17.6            | 0        | 9           | 0      | 524.545         | 8              | CC1=C([C@@H]([C@H]2C(=N1)CC(C2=O)(C)C)C3ccc(c3)COC4ccc(cc4)N+][=O]O-]F)OC(C)C(=O)OC |
| ZINC00703108 | 2.16  | 7.45              | -59.67           | 0        | 7           | -1     | 426.47          | 5              | c1ccc(sc1)[C@H]2C(=C(C(=O)N2C[C@H]3CCC03)O)C(=O)c4ccc5c(c4)OCCO5                    |
| ZINC00703108 | 2.6   | -3.57             | -25.94           | 1        | 7           | 0      | 427.478         | 4              | c1ccc(sc1)[C@H]2C(=C(C(=O)N2C[C@H]3CCC03)O)C(=O)c4ccc5c(c4)OCCO5                    |
| ZINC00703108 | 1.58  | -3.36             | -17.58           | 0        | 7           | 0      | 427.478         | 5              | c1ccc(sc1)[C@H]2[C@@H](C(=O)C(=O)N2C[C@H]3CCC03)C(=O)c4ccc5c(c4)OCCO5               |
| ZINC00878047 | 4.03  | -2.61             | -24.13           | 2        | 8           | 0      | 418.434         | 6              | c1ccc(cc1)c2nc3ccc(cc3o2)N(C(=O)N)C(=O)c4ccc(cc4)N+][=O]O-                          |
| ZINC00650002 | 4.5   | -2.97             | -9.91            | 1        | 3           | 0      | 501.768         | 7              | Cc1c2c([nH]n1)OC(=C([C@H]2c3ccc(c3)COC4ccc(cc4)Br)OC)C#N                            |
| ZINC06474972 | 4.05  | -0.66             | -24.16           | 2        | 8           | 0      | 431.429         | 5              | c1ccc2c(c1)C(=O)c3ccc(cc3C2=O)N(C(=O)N)C(=O)c4ccc(cc4)N+][=O]O-                     |
| ZINC08441630 | 3.04  | 8.13              | -63.76           | 0        | 6           | -1     | 424.498         | 5              | C[C@H]1Cc2cc(ccc2O1)C(=O)C3=C(C(=O)N)[C@H]3c4ccc4)C[C@H]5CCO5]O-                    |
| ZINC08441630 | 3.49  | -3.23             | -30.63           | 1        | 6           | 0      | 425.506         | 4              | C[C@H]1Cc2cc(ccc2O1)C(=O)C3=C(C(=O)N)[C@H]4CCO4)c5ccc5O                             |
| ZINC08441630 | 2.46  | -3.03             | -21.45           | 0        | 6           | 0      | 425.506         | 5              | C[C@H]1Cc2cc(ccc2O1)C(=O)[C@H]3[C@@H](N(C(=O)C3=O)C)[C@H]4CCO4)c5ccc5               |
| ZINC00877702 | 5.06  | 0.78              | -14.21           | 1        | 9           | 0      | 491.525         | 8              | COC1ccc(cc1)OC(C)C(=O)Nc2nc(c2)c3ccc3c4ccc(cc4)N+][=O]O-                            |
| ZINC00650005 | 4.5   | -2.98             | -9.95            | 1        | 3           | 0      | 501.768         | 7              | Cc1c2c([nH]n1)OC(=C([C@H]2c3ccc(c3)COC4ccc(cc4)Br)OC)C#N                            |
| ZINC04089482 | 2.17  | -5.61             | -17.06           | 0        | 10          | 0      | 494.957         | 5              | c1ccc(c1)C(=O)N2CCN(CC2)c3ccc(cc3S(=O)(=O)N4CCOCC4)N+][=O]O-]Cl                     |

**Supplementary Table S2:**  
**Detailed table of XP Docking using Schrodinger's Glide module**

| ZINC_ID      | sLogP | ApolarDesolvation | PolarDesolvation | H Donors | H Acceptors | Charge | MolecularWeight | RotatableBonds | SMILES                                                                       |
|--------------|-------|-------------------|------------------|----------|-------------|--------|-----------------|----------------|------------------------------------------------------------------------------|
| ZINC08441629 | 3.04  | 8.17              | -63.51           | 0        | 6           | -1     | 424.498         | 5              | C[C@@H]1Cc2cc(ccc2O1)C(=O)C3=C(C(=O)N([C@H]3c4cccs4)C[C@@H]5CCCCO5)[O-]      |
| ZINC08441629 | 3.49  | -2.36             | -24.77           | 1        | 6           | 0      | 425.506         | 4              | C[C@@H]1Cc2cc(ccc2O1)C(=O)C3=C(C(=O)N([C@H]3c4cccs4)C[C@@H]4CCCCO4)c5cccs5   |
| ZINC08441629 | 2.46  | -2.1              | -20.47           | 0        | 6           | 0      | 425.506         | 5              | C[C@@H]1Cc2cc(ccc2O1)C(=O)C3=C(C(=O)N([C@H]3c4cccs4)C[C@@H]4CCCCO4)c5cccs5   |
| ZINC01019940 | 3.04  | 8.58              | -44.08           | 0        | 6           | -1     | 424.498         | 5              | C[C@@H]1Cc2cc(ccc2O1)C(=O)C3=C(C(=O)N([C@H]3c4cccs4)C[C@@H]5CCCCO5)[O-]      |
| ZINC01019940 | 3.49  | -3.1              | -30.59           | 1        | 6           | 0      | 425.506         | 4              | C[C@@H]1Cc2cc(ccc2O1)C(=O)C3=C(C(=O)N([C@H]3c4cccs4)C[C@@H]4CCCCO4)c5cccs5   |
| ZINC01019940 | 2.46  | -2.82             | -24.58           | 0        | 6           | 0      | 425.506         | 5              | C[C@@H]1Cc2cc(ccc2O1)C(=O)C3=C(C(=O)N([C@H]3c4cccs4)C[C@@H]4CCCCO4)c5cccs5   |
| ZINC08441627 | 3.41  | -3.13             | -13.44           | 1        | 7           | 0      | 445.317         | 5              | c1cc(ccc1C(=O)N2CCN(CC2)c3ccc(c3)NC4CC4)N+([=O])[O-]Br                       |
| ZINC08441626 | 3.69  | -5.09             | -20.34           | 0        | 8           | 0      | 432.889         | 4              | c1cc2c(ccc(c2nc1)N+)(=O)[O-]N3CCN(CC3)S(=O)(=O)c4ccc(cc4)Cl                  |
| ZINC08441625 | 3.04  | 8.28              | -62.92           | 0        | 6           | -1     | 424.498         | 5              | C[C@@H]1Cc2cc(ccc2O1)C(=O)C3=C(C(=O)N([C@H]3c4cccs4)C[C@@H]5CCCCO5)[O-]      |
| ZINC08441625 | 3.49  | -3.26             | -25.41           | 1        | 6           | 0      | 425.506         | 4              | C[C@@H]1Cc2cc(ccc2O1)C(=O)C3=C(C(=O)N([C@H]3c4cccs4)C[C@@H]4CCCCO4)c5cccs5   |
| ZINC08441625 | 2.46  | -3.05             | -15.99           | 0        | 6           | 0      | 425.506         | 5              | C[C@@H]1Cc2cc(ccc2O1)C(=O)C3=C(C(=O)N([C@H]3c4cccs4)C[C@@H]4CCCCO4)c5cccs5   |
| ZINC0877571  | 3.38  | 11.87             | -22.84           | 2        | 8           | 0      | 446.488         | 7              | c1ccc(cc1)[C@H](CC(=O)Nc2nc3ccc(cc3s2)N+)(=O)[O-]NC(=O)c4ccc(cc4)Cl          |
| ZINC08441624 | 6.31  | 3.1               | -11.69           | 2        | 0           | 0      | 515.528         | 6              | CCOC(=O)C1[C@@H](C2=C(CCCC2=O)N=C1C)c3ccc(c3)C0c4cccc(c4)C(F)(F)OC           |
| ZINC08441624 | 6.31  | 2.9               | -15.1            | 0        | 6           | 0      | 515.528         | 9              | CCOC(=O)C1=C(N=C2CCC(=O)C2)[C@@H]1c3ccc(c3)C0c4cccc(c4)C(F)(F)OC             |
| ZINC08441624 | 6.5   | 1.99              | -12.99           | 0        | 6           | 0      | 515.528         | 9              | CCOC(=O)C1[C@@H](C2C=NC1=C)CCC2=O)c3ccc(c3)C0c4cccc(c4)C(F)(F)OC             |
| ZINC08441623 | 2.3   | 6.82              | -63.21           | 0        | 9           | -1     | 480.493         | 7              | COC1ccc(c1)OC[C@@H]2C(=C(C(=O)N2C[C@@H]3CCCCO3)[O-])C(=O)c4ccc5c(c4)OCCO5    |
| ZINC08441623 | 2.75  | -2.29             | -31.36           | 1        | 9           | 0      | 481.501         | 6              | COC1ccc(c1)OC[C@@H]2C(=C(C(=O)N2C[C@@H]3CCCCO3)[O-])C(=O)c4ccc5c(c4)OCCO5    |
| ZINC08441623 | 1.72  | -2.13             | -24.13           | 0        | 9           | 0      | 481.501         | 7              | COC1ccc(c1)OC[C@@H]2C(=C(C(=O)N2C[C@@H]3CCCCO3)[O-])C(=O)c4ccc5c(c4)OCCO5    |
| ZINC0877569  | 3.38  | 11.87             | -22.91           | 2        | 8           | 0      | 446.488         | 7              | c1ccc(cc1)[C@@H](CC(=O)Nc2nc3ccc(cc3s2)N+)(=O)[O-]NC(=O)c4ccc(cc4)Cl         |
| ZINC02064354 | 4.68  | 12.16             | -19.43           | 1        | 10          | 0      | 479.547         | 7              | CCn1c2ccc(c2c3c1nc(n3)S(=O)(=O)Nc4ccc(cc4)N+)(=O)[O-]                        |
| ZINC08441622 | 4.15  | -0.56             | -18.08           | 1        | 9           | 0      | 422.47          | 7              | CCn1c2ccc(c2c3c1nc(n3)S(=O)(=O)Nc4ccc(cc4)N+)(=O)[O-]                        |
| ZINC08441621 | 2.3   | 6.58              | -63.86           | 0        | 9           | -1     | 480.493         | 7              | COC1ccc(c1)OC[C@@H]2C(=C(C(=O)N2C[C@@H]3CCCCO3)[O-])C(=O)c4ccc5c(c4)OCCO5    |
| ZINC08441621 | 2.75  | -1.69             | -25.28           | 1        | 9           | 0      | 481.501         | 6              | COC1ccc(c1)OC[C@@H]2C(=C(C(=O)N2C[C@@H]3CCCCO3)[O-])C(=O)c4ccc5c(c4)OCCO5    |
| ZINC08441621 | 1.72  | -1.43             | -20.54           | 0        | 9           | 0      | 481.501         | 7              | COC1ccc(c1)OC[C@@H]2C(=C(C(=O)N2C[C@@H]3CCCCO3)[O-])C(=O)c4ccc5c(c4)OCCO5    |
| ZINC08441618 | 4.77  | -1.31             | -25.71           | 2        | 5           | 0      | 420.877         | 4              | c1ccc2c(c1)C(=O)c3ccc(cc3C2=O)NC(=S)N(=O)c4ccc(cc4)Cl                        |
| ZINC08441617 | 6.31  | 3.1               | -11.74           | 2        | 0           | 0      | 515.528         | 6              | CCOC(=O)C1[C@@H](C2=C(CCCC2=O)N=C1C)c3ccc(c3)C0c4cccc(c4)C(F)(F)OC           |
| ZINC08441617 | 6.31  | 2.74              | -15.24           | 0        | 6           | 0      | 515.528         | 9              | CCOC(=O)C1=C(N=C2CCC(=O)C2)[C@@H]1c3ccc(c3)C0c4cccc(c4)C(F)(F)OC             |
| ZINC08441617 | 6.5   | 1.82              | -12.84           | 0        | 6           | 0      | 515.528         | 9              | CCOC(=O)C1[C@@H](C2C=NC1=C)CCC2=O)c3ccc(c3)C0c4cccc(c4)C(F)(F)OC             |
| ZINC08441616 | 2.3   | 6.75              | -66.29           | 0        | 9           | -1     | 480.493         | 7              | COC1ccc(c1)OC[C@@H]2C(=C(C(=O)N2C[C@@H]3CCCCO3)[O-])C(=O)c4ccc5c(c4)OCCO5    |
| ZINC08441616 | 2.75  | -1.81             | -29.93           | 1        | 9           | 0      | 481.501         | 6              | COC1ccc(c1)OC[C@@H]2C(=C(C(=O)N2C[C@@H]3CCCCO3)[O-])C(=O)c4ccc5c(c4)OCCO5    |
| ZINC08441616 | 1.72  | -1.61             | -21.72           | 0        | 9           | 0      | 481.501         | 7              | COC1ccc(c1)OC[C@@H]2C(=C(C(=O)N2C[C@@H]3CCCCO3)[O-])C(=O)c4ccc5c(c4)OCCO5    |
| ZINC0331109  | 3.67  | 2.43              | -15.73           | 1        | 6           | 0      | 318.304         | 5              | C1ccc(cc1)C(=O)Nc2cc(ccc2F)N+([=O])[O-]                                      |
| ZINC02973109 | 4.35  | 1.97              | -14.31           | 0        | 1           | 0      | 332.331         | 6              | CCCCOc1ccc(c1)C(=O)Nc2cc(ccc2F)N+([=O])[O-]                                  |
| ZINC08441615 | 4.36  | -2.9              | -18.03           | 1        | 10          | 0      | 499.545         | 10             | Cc1ccc(cc1N+)(=O)[O-]S(=O)(=O)N(C(=O)Nc2ccc(cc2O)C)c3ccc(cc3)OC              |
| ZINC02064327 | 4.04  | 11.81             | -34.38           | 1        | 8           | 0      | 420.45          | 8              | CCOC(=O)c1ccc(c1N/C=C(C#N)/c2nc(s2)c3ccc(cc3)N+)(=O)[O-]                     |
| ZINC02064327 | 4.04  | 11.81             | -25.94           | 1        | 8           | 0      | 420.45          | 8              | CCOC(=O)c1ccc(c1N/C=C(C#N)/c2nc(s2)c3ccc(cc3)N+)(=O)[O-]                     |
| ZINC08441614 | 2.3   | 6.09              | -68.37           | 0        | 9           | -1     | 480.493         | 7              | COC1ccc(c1)OC[C@@H]2C(=C(C(=O)N2C[C@@H]3CCCCO3)[O-])C(=O)c4ccc5c(c4)OCCO5    |
| ZINC08441614 | 2.75  | -2.08             | -31.52           | 1        | 9           | 0      | 481.501         | 6              | COC1ccc(c1)OC[C@@H]2C(=C(C(=O)N2C[C@@H]3CCCCO3)[O-])C(=O)c4ccc5c(c4)OCCO5    |
| ZINC08441614 | 1.72  | -1.94             | -24.1            | 0        | 9           | 0      | 481.501         | 7              | COC1ccc(c1)OC[C@@H]2C(=C(C(=O)N2C[C@@H]3CCCCO3)[O-])C(=O)c4ccc5c(c4)OCCO5    |
| ZINC02064325 | 4.07  | 11.81             | -26.74           | 1        | 8           | 0      | 420.45          | 8              | CCOC(=O)c1ccc(c1N/C=C(C#N)/c2nc(s2)c3ccc(cc3)N+)(=O)[O-]                     |
| ZINC02064325 | 4.07  | 11.81             | -19.3            | 1        | 8           | 0      | 420.45          | 8              | CCOC(=O)c1ccc(c1N/C=C(C#N)/c2nc(s2)c3ccc(cc3)N+)(=O)[O-]                     |
| ZINC08441613 | 1.75  | 15.9              | -36.11           | 0        | 4           | 1      | 438.613         | 9              | Cc1c(scn+1)CC(=O)c2ccc(c2)CCOC(=O)CC3CC5CC(C3)CC(C5)C4                       |
| ZINC15880061 | 2.71  | 8.74              | -62.23           | 0        | 7           | -1     | 434.468         | 5              | Cc1ccc(cc1)[C@@H]2C(=C(C(=O)N2C[C@@H]3CCCCO3)[O-])C(=O)c4ccc5c(c4)OCCO5      |
| ZINC15880062 | 2.71  | 8.7               | -63.74           | 0        | 7           | -1     | 434.468         | 5              | Cc1ccc(cc1)[C@@H]2C(=C(C(=O)N2C[C@@H]3CCCCO3)[O-])C(=O)c4ccc5c(c4)OCCO5      |
| ZINC08441610 | 7.13  | 0.5               | -10.38           | 2        | 0           | 0      | 574.899         | 6              | CC1=NC2=C(C(=O)N2C[C@@H]3CCCCO3)[O-]C(=O)c4ccc5c(c4)OCCO5                    |
| ZINC08441610 | 7.32  | 0.59              | -11.07           | 0        | 6           | 0      | 574.899         | 7              | CC1(C2=NC(=C)C(C(=O)N2C[C@@H]3CCCCO3)[O-])C(=O)c4ccc5c(c4)OCCO5              |
| ZINC08441610 | 7.32  | 1.81              | -10.98           | 0        | 6           | 0      | 574.899         | 7              | CC1(C2=NC(=C)C(C(=O)N2C[C@@H]3CCCCO3)[O-])C(=O)c4ccc5c(c4)OCCO5              |
| ZINC08441610 | 7.13  | 0.71              | -13.36           | 0        | 6           | 0      | 574.899         | 7              | CC1=C(C(=O)N2C[C@@H]3CCCCO3)[O-]C(=O)c4ccc5c(c4)OCCO5                        |
| ZINC02064317 | 1.59  | 14.02             | -40.28           | 0        | 4           | 1      | 445.358         | 8              | Cc1c(scn+1)CC(=O)c2ccc(cc2)BrC(=O)c3ccc(cc3)N+([=O])[O-]                     |
| ZINC15880059 | 2.71  | 8.67              | -66.44           | 0        | 7           | -1     | 434.468         | 5              | Cc1ccc(cc1)[C@@H]2C(=C(C(=O)N2C[C@@H]3CCCCO3)[O-])C(=O)c4ccc5c(c4)OCCO5      |
| ZINC15880060 | 2.71  | 8.22              | -67.62           | 0        | 7           | -1     | 434.468         | 5              | Cc1ccc(cc1)[C@@H]2C(=C(C(=O)N2C[C@@H]3CCCCO3)[O-])C(=O)c4ccc5c(c4)OCCO5      |
| ZINC08441605 | 7.13  | 0.59              | -10.44           | 2        | 0           | 0      | 574.899         | 6              | CC1=NC2=C(C(=O)N2C[C@@H]3CCCCO3)[O-]C(=O)c4ccc5c(c4)OCCO5                    |
| ZINC08441605 | 7.32  | 0.65              | -10.91           | 0        | 6           | 0      | 574.899         | 7              | CC1(C2=NC(=C)C(C(=O)N2C[C@@H]3CCCCO3)[O-])C(=O)c4ccc5c(c4)OCCO5              |
| ZINC08441605 | 7.32  | 1.96              | -12.23           | 0        | 6           | 0      | 574.899         | 7              | CC1(C2=NC(=C)C(C(=O)N2C[C@@H]3CCCCO3)[O-])C(=O)c4ccc5c(c4)OCCO5              |
| ZINC08441605 | 7.13  | 0.53              | -13.48           | 0        | 6           | 0      | 574.899         | 7              | CC1=C(C(=O)N2C[C@@H]3CCCCO3)[O-]C(=O)c4ccc5c(c4)OCCO5                        |
| ZINC08441604 | 2.99  | -5.58             | -32.42           | 0        | 12          | 0      | 498.539         | 6              | CC1ccc(cc1S(=O)(=O)N2CCN(CC2)S(=O)(=O)c3ccc(cc3)N+)(=O)[O-]N+([=O])[O-]      |
| ZINC08441603 | 4.54  | 11.42             | -60.24           | 0        | 8           | -1     | 502.543         | 10             | CCCCCoc1ccc(cc1)[C@@H]2C(=C(C(=O)N2C[C@@H]3CCCCO3)[O-])C(=O)c4ccc5c(c4)OCCO5 |
| ZINC08441603 | 4.99  | 0.33              | -27.25           | 1        | 8           | 0      | 503.551         | 9              | CCCCCoc1ccc(cc1)[C@@H]2C(=C(C(=O)N2C[C@@H]3CCCCO3)[O-])C(=O)c4ccc5c(c4)OCCO5 |
| ZINC08441603 | 3.96  | 0.61              | -21.24           | 0        | 8           | 0      | 503.551         | 10             | CCCCCoc1ccc(cc1)[C@@H]2C(=C(C(=O)N2C[C@@H]3CCCCO3)[O-])C(=O)c4ccc5c(c4)OCCO5 |
| ZINC08441602 | 3.13  | 10.63             | -54.84           | 0        | 7           | -1     | 460.304         | 7              | COC1ccc(cc1OC)[C@@H]2C(=C(C(=O)N2C[C@@H]3CCCCO3)[O-])C(=O)c4ccc5c(c4)OCCO5   |
| ZINC08441601 | 4.54  | 0.65              | -14.73           | 0        | 0           | 0      | 437.492         | 7              | CCOC(=O)C1[C@@H](C2=C(CCCC2=O)N=C1C)c3ccc(cc3)C0c4cccc(c4)OC                 |





**Supplementary Table S2:**  
**Detailed table of XP Docking using Schrodinger's Glide module**

| ZINC_ID      | sLogP | ApolarDesolvation | PolarDesolvation | H Donors | H Acceptors | Charge | MolecularWeight | RotatableBonds | SMILES                                                                               |
|--------------|-------|-------------------|------------------|----------|-------------|--------|-----------------|----------------|--------------------------------------------------------------------------------------|
| ZINC05918812 | 3.92  | 0.79              | -24.4            | 0        | 8           | 0      | 517.578         | 10             | CCCCOc1ccc(cc1OC)[C@@H]2[C@@H](C(=O)C(=O)N2Cc3ccc3)C(=O)c4ccc5c(c4)C[C@H](O5)C       |
| ZINC00857211 | 2.38  | 7.06              | -15.89           | 2        | 6           | 0      | 422.666         | 4              | c1ccc(cc1)Br[C@H]2CC(=O)N(C2=O)c3ccc(cc3)Cl                                          |
| ZINC00857211 | 2.38  | 7.24              | -14.16           | 2        | 6           | 0      | 422.666         | 4              | c1ccc(cc1)Br[C@H]2CC(=O)N(C2=O)c3ccc(cc3)Cl                                          |
| ZINC00971723 | 2.36  | 7.06              | -16.5            | 2        | 6           | 0      | 422.666         | 4              | c1ccc(cc1)C(=O)N[C@@H]2CC(=O)N(C2=O)c3ccc(cc3)ClBr                                   |
| ZINC05918863 | 4.51  | 12.06             | -58.49           | 0        | 8           | -1     | 516.57          | 10             | CCCCOc1ccc(cc1OC)[C@@H]2C(=C(C(=O)N2Cc3ccc3))O(=O)C(=O)c4ccc5c(c4)C[C@H](O5)C        |
| ZINC05918863 | 4.95  | 0.99              | -28.76           | 1        | 8           | 0      | 517.578         | 9              | CCCCOc1ccc(cc1OC)[C@@H]2C(=C(c3ccc4c(c3)C[C@@H](O4)C)O)C(=O)C(=O)N2Cc5ccc5           |
| ZINC05918863 | 3.92  | 1.26              | -21.03           | 0        | 8           | 0      | 517.578         | 10             | CCCCOc1ccc(cc1OC)[C@@H]2[C@@H](C(=O)C(=O)N2Cc3ccc3)C(=O)c4ccc5c(c4)C[C@H](O5)C       |
| ZINC00857173 | 3.2   | 10.49             | -18.57           | 2        | 6           | 0      | 478.346         | 6              | c1ccc(cc1)C(c2cccc2)C(=O)N[C@@H]3CC(=O)N(C3=O)c4ccc(cc4)Br                           |
| ZINC00857173 | 3.2   | 10.67             | -16.72           | 2        | 6           | 0      | 478.346         | 6              | c1ccc(cc1)C(c2cccc2)C(=O)N[C@@H]3CC(=O)N(C3=O)c4ccc(cc4)Br                           |
| ZINC05918806 | 4.51  | 11.61             | -60.08           | 0        | 8           | -1     | 516.57          | 10             | CCCCOc1ccc(cc1OC)[C@@H]2C(=C(C(=O)N2Cc3ccc3))O(=O)C(=O)c4ccc5c(c4)C[C@H](O5)C        |
| ZINC05918806 | 4.95  | 1.01              | -31.68           | 1        | 8           | 0      | 517.578         | 9              | CCCCOc1ccc(cc1OC)[C@@H]2C(=C(c3ccc4c(c3)C[C@@H](O4)C)O)C(=O)C(=O)N2Cc5ccc5           |
| ZINC05918806 | 3.92  | 1.23              | -22.27           | 0        | 8           | 0      | 517.578         | 10             | CCCCOc1ccc(cc1OC)[C@@H]2[C@@H](C(=O)C(=O)N2Cc3ccc3)C(=O)c4ccc5c(c4)C[C@H](O5)C       |
| ZINC08441581 | 5.85  | -0.1              | -11.11           | 2        | 0           | 0      | 512.4           | 6              | CC1=NC2=C([C@@H](C1C(=O)OC)c3ccc(c(c3)C)O)C4=CC(=O)C(C4)Br)OC(C)=O)CC2               |
| ZINC08441581 | 5.85  | -0.06             | -14.68           | 0        | 6           | 0      | 512.4           | 7              | CC1=C([C@@H]([C@@H]2C(=O)N)C(=O)C)C(=O)c3ccc(c(c3)C)C(=O)C4=CC(=O)C(C4)Br)OC(C)=O)OC |
| ZINC08441581 | 6.03  | 1.11              | -11.68           | 0        | 6           | 0      | 512.4           | 7              | C0c1ccc(cc1)C0c2ccc(cc2)Br][C@@H]3[C@@H]4C(=NC(=C)C3C(=O)OC)CCCC4=O                  |
| ZINC08441581 | 6.03  | 0.05              | -12.25           | 0        | 6           | 0      | 512.4           | 7              | C0c1ccc(cc1)C0c2ccc(cc2)Br][C@@H]3[C@@H]4C(=NC(=C)C3C(=O)OC)CCCC4=O                  |
| ZINC00971719 | 2.76  | 7.79              | -13.28           | 2        | 6           | 0      | 514.117         | 4              | c1ccc(cc1)C(=O)N[C@@H]2CC(=O)N(C2=O)c3ccc(cc3)Br                                     |
| ZINC00703087 | 3.84  | 1.16              | -17.21           | 1        | 9           | 0      | 533.577         | 10             | CC(C)CCOc1ccc(cc1OC)[C@@H]2C(=C(C(=O)N2Cc3ccc3))O(=O)C(=O)c4ccc5c(c4)OCCO5           |
| ZINC00703087 | 3.26  | 1                 | -21.57           | 0        | 9           | 0      | 533.577         | 10             | CC(C)CCOc1ccc(cc1OC)[C@@H]2[C@@H](C(=O)C(=O)N2Cc3ccc3)C(=O)c4ccc5c(c4)OCCO5          |
| ZINC00857151 | 2.51  | 7.34              | -14.18           | 2        | 6           | 0      | 467.117         | 4              | c1ccc(cc1)Br[C@H]2CC(=O)N(C2=O)c3ccc(cc3)Br                                          |
| ZINC00857151 | 2.51  | 7.16              | -15.86           | 2        | 6           | 0      | 467.117         | 4              | c1ccc(cc1)Br[C@H]2CC(=O)N(C2=O)c3ccc(cc3)Br                                          |
| ZINC00857149 | 2.49  | 7.16              | -16.51           | 2        | 6           | 0      | 467.117         | 4              | c1ccc(cc1)C(=O)N[C@@H]2CC(=O)N(C2=O)c3ccc(cc3)Br                                     |
| ZINC08441580 | 3.84  | 1.34              | -19.02           | 1        | 9           | 0      | 533.577         | 10             | CC(C)CCOc1ccc(cc1OC)[C@@H]2C(=C(C(=O)N2Cc3ccc3))O(=O)C(=O)c4ccc5c(c4)OCCO5           |
| ZINC08441580 | 3.26  | 1.16              | -24.45           | 0        | 9           | 0      | 533.577         | 10             | CC(C)CCOc1ccc(cc1OC)[C@@H]2[C@@H](C(=O)C(=O)N2Cc3ccc3)C(=O)c4ccc5c(c4)OCCO5          |
| ZINC00971717 | 2.38  | 7.06              | -15.94           | 2        | 6           | 0      | 422.666         | 4              | c1ccc(cc1)C(=O)N[C@@H]2CC(=O)N(C2=O)c3ccc(cc3)Br                                     |
| ZINC00857147 | 2.36  | 7.05              | -16.85           | 2        | 6           | 0      | 422.666         | 4              | c1ccc(cc1)C(=O)N[C@@H]2CC(=O)N(C2=O)c3ccc(cc3)Br                                     |
| ZINC00857147 | 2.36  | 7.22              | -14.49           | 2        | 6           | 0      | 422.666         | 4              | c1ccc(cc1)C(=O)N[C@@H]2CC(=O)N(C2=O)c3ccc(cc3)Br                                     |
| ZINC08441579 | 6.48  | -0.17             | -11              | 2        | 0           | 0      | 546.845         | 6              | CC1=NC2=C([C@@H](C1C(=O)OC)c3ccc(c(c3)C)O)C4=CC(=O)C(C4)Br)OC(C)=O)CC2               |
| ZINC08441579 | 6.66  | 0.09              | -12.31           | 0        | 6           | 0      | 546.845         | 7              | C0c1ccc(cc1)C0c2ccc(cc2)Br][C@@H]3[C@@H]4C(=NC(=C)C3C(=O)OC)CCCC4=O                  |
| ZINC08441579 | 6.48  | -0.07             | -14.51           | 0        | 6           | 0      | 546.845         | 7              | CC1=C([C@@H]([C@@H]2C(=O)N)C(=O)C)C(=O)c3ccc(c(c3)C)C(=O)C4=CC(=O)C(C4)Br)OC(C)=O)OC |
| ZINC08441579 | 6.66  | 1.14              | -12.57           | 0        | 6           | 0      | 546.845         | 7              | C0c1ccc(cc1)C0c2ccc(cc2)Br][C@@H]3[C@@H]4C(=NC(=C)C3C(=O)OC)CCCC4=O                  |
| ZINC00703083 | 4.72  | 12.42             | -58.83           | 0        | 8           | -1     | 530.597         | 10             | C[C@@H]1Cc2cc(ccc2O1)C(=O)C3=C(C(=O)N)C[C@@H]3c4ccc(c(c4)O)C(=O)C(C)Cc5ccc5[O-]      |
| ZINC00703083 | 5.17  | 1.3               | -28.66           | 1        | 8           | 0      | 531.605         | 9              | C[C@@H]1Cc2cc(ccc2O1)C(=O)C3=C(C(=O)N)C[C@@H]3c4ccc(c(c4)O)C(=O)C(C)Cc5ccc5[O-]      |
| ZINC00703083 | 4.14  | 1.57              | -20.88           | 0        | 8           | 0      | 531.605         | 10             | C[C@@H]1Cc2cc(ccc2O1)C(=O)C3=C(C(=O)N)C[C@@H]3c4ccc(c(c4)O)C(=O)C(C)Cc5ccc5[O-]      |
| ZINC00241845 | 2.3   | -4.1              | -11.68           | 1        | 5           | 0      | 299.373         | 5              | C0c1ccc(cc1OC)NS(=O)=[O]c2ccc2                                                       |
| ZINC08441578 | 6.01  | 1.57              | -28.11           | 2        | 10          | 0      | 606.631         | 12             | C0c1ccc(cc1)N/C=C/C(=O)c2ccc3c(c2)OC3)C4=CC(=O)C(C4)OC)N(C=C)C(=O)c5ccc6c(c5)OC6     |
| ZINC00703084 | 4.72  | 12.45             | -58.72           | 0        | 8           | -1     | 530.597         | 10             | C[C@@H]1Cc2cc(ccc2O1)C(=O)C3=C(C(=O)N)C[C@@H]3c4ccc(c(c4)O)C(=O)C(C)Cc5ccc5[O-]      |
| ZINC00703084 | 5.17  | 1.24              | -28.61           | 1        | 8           | 0      | 531.605         | 9              | C[C@@H]1Cc2cc(ccc2O1)C(=O)C3=C(C(=O)N)C[C@@H]3c4ccc(c(c4)O)C(=O)C(C)Cc5ccc5[O-]      |
| ZINC00703084 | 4.14  | 1.45              | -19.66           | 0        | 8           | 0      | 531.605         | 10             | C[C@@H]1Cc2cc(ccc2O1)C(=O)C3=C(C(=O)N)C[C@@H]3c4ccc(c(c4)O)C(=O)C(C)Cc5ccc5[O-]      |
| ZINC08441577 | 6.39  | 1.5               | -51.03           | 2        | 3           | -1     | 435.591         | 6              | c1ccc(cc1)CC2CC(NH+)[C(=O)C]2C3=CC(=O)C(=O)Nc4ccc5ccc5c4                             |
| ZINC00703085 | 4.72  | 12.05             | -60.1            | 0        | 8           | -1     | 530.597         | 10             | C[C@@H]1Cc2cc(ccc2O1)C(=O)C3=C(C(=O)N)C[C@@H]3c4ccc(c(c4)O)C(=O)C(C)Cc5ccc5[O-]      |
| ZINC00703085 | 5.17  | 1.33              | -31.55           | 1        | 8           | 0      | 531.605         | 9              | C[C@@H]1Cc2cc(ccc2O1)C(=O)C3=C(C(=O)N)C[C@@H]3c4ccc(c(c4)O)C(=O)C(C)Cc5ccc5[O-]      |
| ZINC00703085 | 4.14  | 1.54              | -22.17           | 0        | 8           | 0      | 531.605         | 10             | C[C@@H]1Cc2cc(ccc2O1)C(=O)C3=C(C(=O)N)C[C@@H]3c4ccc(c(c4)O)C(=O)C(C)Cc5ccc5[O-]      |
| ZINC08441576 | 6.48  | -0.2              | -11.04           | 2        | 0           | 0      | 546.845         | 6              | CC1=NC2=C([C@@H](C1C(=O)OC)c3ccc(c(c3)C)O)C4=CC(=O)C(C4)Br)OC(C)=O)CC2               |
| ZINC08441576 | 6.66  | -0.14             | -11.93           | 0        | 6           | 0      | 546.845         | 7              | C0c1ccc(cc1)C0c2ccc(cc2)Br][C@@H]3[C@@H]4C(=NC(=C)C3C(=O)OC)CCCC4=O                  |
| ZINC08441576 | 6.48  | -0.27             | -14.55           | 0        | 6           | 0      | 546.845         | 7              | CC1=C([C@@H]([C@@H]2C(=O)N)C(=O)C)C(=O)c3ccc(c(c3)C)C(=O)C4=CC(=O)C(C4)Br)OC(C)=O)OC |
| ZINC08441576 | 6.66  | 1.28              | -17.68           | 0        | 6           | 0      | 546.845         | 7              | C0c1ccc(cc1)C0c2ccc(cc2)Br][C@@H]3[C@@H]4C(=NC(=C)C3C(=O)OC)CCCC4=O                  |
| ZINC02064253 | 5.82  | 1.76              | -15.62           | 0        | 6           | 0      | 472.548         | 6              | C0c1cc2c(cc1OC)cnc3c2c(mn3c4ccc4)C5=CCCC5)c6ccc6                                     |
| ZINC02064252 | 6.33  | 2.92              | -16.09           | 0        | 8           | 0      | 502.53          | 6              | C0c1cc2c(cc1OC)cnc3c2c(mn3c4ccc4)C5=CCCC5)c6ccc6                                     |
| ZINC00703086 | 4.72  | 12.08             | -59.64           | 0        | 8           | -1     | 530.597         | 10             | C[C@@H]1Cc2cc(ccc2O1)C(=O)C3=C(C(=O)N)C[C@@H]3c4ccc(c(c4)O)C(=O)C(C)Cc5ccc5[O-]      |
| ZINC00703086 | 5.17  | 0.84              | -29.21           | 1        | 8           | 0      | 531.605         | 9              | C[C@@H]1Cc2cc(ccc2O1)C(=O)C3=C(C(=O)N)C[C@@H]3c4ccc(c(c4)O)C(=O)C(C)Cc5ccc5[O-]      |
| ZINC00703086 | 4.14  | 1.1               | -24.32           | 0        | 8           | 0      | 531.605         | 10             | C[C@@H]1Cc2cc(ccc2O1)C(=O)C3=C(C(=O)N)C[C@@H]3c4ccc(c(c4)O)C(=O)C(C)Cc5ccc5[O-]      |
| ZINC00861338 | 4.77  | 0.96              | -10.97           | 2        | 6           | 0      | 440.496         | 7              | CCOC(=O)c1c(csc1NC(=O)c2cccc2)C(=O)Nc3ccc3F3C                                        |
| ZINC08441575 | 4.19  | 12.37             | -61.67           | 0        | 8           | -1     | 522.533         | 8              | c1ccc(cc1)C0c2ccc(cc2)Br][C@@H]3C(=C(C(=O)N)C3Cc4ccc4)O(=O)C(=O)c5ccc6c(c5)OCCO6     |
| ZINC08441575 | 4.64  | 0.16              | -29.45           | 1        | 8           | 0      | 523.541         | 7              | c1ccc(cc1)C0c2ccc(cc2)Br][C@@H]3C(=C(c4ccc5c(c4)OCCO5)O)C(=O)C(=O)N3Cc6ccc6          |
| ZINC08441575 | 3.61  | 0.45              | -23.39           | 0        | 8           | 0      | 523.541         | 8              | c1ccc(cc1)C0c2ccc(cc2)Br][C@@H]3[C@@H](C(=O)C(=O)N3Cc4ccc4)C(=O)c5ccc6c(c5)OCCO6     |
| ZINC00181717 | 2.92  | 0.29              | -12.4            | 0        | 5           | 0      | 324.38          | 3              | CC1=NC2=C([C@@H](C1C#N)c3ccc(cc3OC)OC)C(=O)CC2                                       |
| ZINC00181717 | 3.1   | 0.49              | -12.46           | 0        | 5           | 0      | 324.38          | 3              | C0c1ccc(cc1)OC][C@@H]2C(C(=O)N)C3=CC2(C(=O)N)C3C#N                                   |
| ZINC08441574 | 6.88  | 0.96              | -9.9             | 2        | 0           | 0      | 554.481         | 6              | CCOC(=O)C1[C@@H](C2=C(C(=O)C)C)N(C=C)C3=CC(=O)C(C3)C0c4ccc(c4)Br)OC                  |
| ZINC08441574 | 7.06  | 0.02              | -10.82           | 0        | 6           | 0      | 554.481         | 8              | CCOC(=O)C1[C@@H](C2=C(C(=O)C)C)C(=O)C3=CC(=O)C(C3)C0c4ccc(c4)Br)OC                   |
| ZINC08441574 | 6.88  | 0.94              | -12.9            | 0        | 6           | 0      | 554.481         | 8              | CCOC(=O)C1=C(N=C2CC(C(=O)C)C2)[C@@H]1c3ccc(c(c3)C)C0c4ccc(c4)Br)OC(C)C               |

**Supplementary Table S2:**  
**Detailed table of XP Docking using Schrodinger's Glide module**

| ZINC_ID      | sLogP | ApolarDesolvation | PolarDesolvation | H Donors | H Acceptors | Charge | MolecularWeight | RotatableBonds | SMILES                                                              |
|--------------|-------|-------------------|------------------|----------|-------------|--------|-----------------|----------------|---------------------------------------------------------------------|
| ZINC04112600 | 5.03  | 2.12              | -13.36           | 0        | 8           | 0      | 521.61          | 10             | CC1=NC2=C([C@@H](C1C(=O)OCCOC3CCCC3)C4CCCC(C4)OC)OC(C(=O)CC(C2)(C(C |
| ZINC04112600 | 5.21  | 2.51              | -14.1            | 0        | 8           | 0      | 521.61          | 10             | CC1(CC2=NC(=C)C([C@@H](C2C(=O)C1)C3CCCC(C3)OC)OC(C(=O)OCCOC4CCCC4)C |
| ZINC04112600 | 5.21  | 3.4               | -15.23           | 0        | 8           | 0      | 521.61          | 10             | CC1(CC2=NC(=C)C([C@@H](C2C(=O)C1)C3CCCC(C3)OC)OC(C(=O)OCCOC4CCCC4)C |
| ZINC04112600 | 5.03  | 2.39              | -16.31           | 0        | 8           | 0      | 521.61          | 10             | CC1=C([C@@H](C2C(=O)C1)C3CCCC(C3)OC)OC(C(=O)OCCOC4CCCC4)C           |
| ZINC08441573 | 4.04  | 10.89             | -60.38           | 0        | 8           | -1     | 488.516         | 9              | CCCCOC1CCCC(C1)[C@@H]2C(C(=O)N2C3CCCC3)O-]C(=O)C4CCCC(C4)OCCO5      |
| ZINC08441573 | 4.48  | 0.12              | -27.63           | 1        | 8           | 0      | 489.524         | 8              | CCCCOC1CCCC(C1)[C@@H]2C(C(=O)N2C3CCCC3)O-]C(=O)C4CCCC(C4)OCCO5      |
| ZINC08441573 | 3.45  | 0.35              | -19.94           | 0        | 8           | 0      | 489.524         | 9              | CCCCOC1CCCC(C1)[C@@H]2C(C(=O)N2C3CCCC3)O-]C(=O)C4CCCC(C4)OCCO5      |
| ZINC04112599 | 5.03  | 2.14              | -11.67           | 0        | 8           | 0      | 521.61          | 10             | CC1=NC2=C([C@@H](C1C(=O)OCCOC3CCCC3)C4CCCC(C4)OC)OC(C(=O)CC(C2)(C(C |
| ZINC04112599 | 5.21  | 2.21              | -13.2            | 0        | 8           | 0      | 521.61          | 10             | CC1(CC2=NC(=C)C([C@@H](C2C(=O)C1)C3CCCC(C3)OC)OC(C(=O)OCCOC4CCCC4)C |
| ZINC04112599 | 5.21  | 3.44              | -19.82           | 0        | 8           | 0      | 521.61          | 10             | CC1(CC2=NC(=C)C([C@@H](C2C(=O)C1)C3CCCC(C3)OC)OC(C(=O)OCCOC4CCCC4)C |
| ZINC04112599 | 5.03  | 2.14              | -15.83           | 0        | 8           | 0      | 521.61          | 10             | CC1=C([C@@H](C2C(=O)C1)C3CCCC(C3)OC)OC(C(=O)OCCOC4CCCC4)C           |
| ZINC00181552 | 3     | 0.46              | -12.61           | 0        | 5           | 0      | 324.38          | 3              | CC1=NC2=C([C@@H](C1C#N)C3CCCC(C3)OC)OC(C(=O)OCCO5                   |
| ZINC00181552 | 3.18  | 0.64              | -12.71           | 0        | 5           | 0      | 324.38          | 3              | CC1=NC2=C([C@@H](C1C#N)C3CCCC(C3)OC)OC(C(=O)OCCO5                   |
| ZINC00181552 | 3.18  | 1.9               | -15.28           | 0        | 5           | 0      | 324.38          | 3              | CC1=NC2=C([C@@H](C1C#N)C3CCCC(C3)OC)OC(C(=O)OCCO5                   |
| ZINC08441572 | 4.04  | 11.08             | -57.71           | 0        | 8           | -1     | 488.516         | 9              | CCCCOC1CCCC(C1)[C@@H]2C(C(=O)N2C3CCCC3)O-]C(=O)C4CCCC(C4)OCCO5      |
| ZINC08441572 | 4.48  | -0.17             | -28.23           | 1        | 8           | 0      | 489.524         | 8              | CCCCOC1CCCC(C1)[C@@H]2C(C(=O)N2C3CCCC3)O-]C(=O)C4CCCC(C4)OCCO5      |
| ZINC08441572 | 3.45  | 0.12              | -24.81           | 0        | 8           | 0      | 489.524         | 9              | CCCCOC1CCCC(C1)[C@@H]2C(C(=O)N2C3CCCC3)O-]C(=O)C4CCCC(C4)OCCO5      |
| ZINC08441571 | 5.6   | 0.28              | -10.29           | 0        | 5           | 0      | 483.337         | 4              | COc1ccc(cc1O)[C@@H]2N3[C@@H](CC(=N3)C4CCCC(C4)F)C5CC(C5)OC          |
| ZINC08441570 | 5.6   | 0.74              | -9.14            | 0        | 5           | 0      | 483.337         | 4              | COc1ccc(cc1O)[C@@H]2N3[C@@H](CC(=N3)C4CCCC(C4)F)C5CC(C5)OC          |
| ZINC08441569 | 6.88  | 0.98              | -10.46           | 2        | 0           | 0      | 554.481         | 6              | CCOC(=O)C1[C@@H](C2=C(C(C(=O)C)C)C)C3CCCC(C3)OC4CCCC(C4)Br)OC       |
| ZINC08441569 | 7.06  | -0.29             | -11.11           | 0        | 6           | 0      | 554.481         | 8              | CCOC(=O)C1[C@@H](C2=C(C(C(=O)C)C)C)C3CCCC(C3)OC4CCCC(C4)Br)OC       |
| ZINC08441569 | 6.88  | 0.61              | -13.29           | 0        | 6           | 0      | 554.481         | 8              | CCOC(=O)C1=C(N=C2C(C(=O)C)C)C3CCCC(C3)OC4CCCC(C4)Br)OC              |
| ZINC07060061 | 6.01  | -0.04             | -8.2             | 0        | 4           | 0      | 453.311         | 3              | COc1ccc(cc1)[C@@H]2N3[C@@H](CC(=N3)C4CCCC(C4)F)C5CC(C5)OC           |
| ZINC15885016 | 2.17  | 7.86              | -61.98           | 0        | 10          | -1     | 506.487         | 8              | COc1ccc(cc1O)C([C@@H]2C(C(=O)N2C3CCCC3)O-]C(=O)C4CCCC(C4)OCCO5      |
| ZINC15885018 | 2.17  | 7.63              | -60.56           | 0        | 10          | -1     | 506.487         | 8              | COc1ccc(cc1O)C([C@@H]2C(C(=O)N2C3CCCC3)O-]C(=O)C4CCCC(C4)OCCO5      |
| ZINC08441566 | 6.11  | 0.67              | -7.46            | 0        | 3           | 0      | 441.275         | 2              | c1ccc(cc1)[C@@H]2N3[C@@H](CC(=N3)C4CCCC(C4)F)C5CC(C5)OC             |
| ZINC08441565 | 6.11  | 1.13              | -6               | 0        | 3           | 0      | 441.275         | 2              | c1ccc(cc1)[C@@H]2N3[C@@H](CC(=N3)C4CCCC(C4)F)C5CC(C5)OC             |
| ZINC08441564 | 6.86  | 0.07              | -10.96           | 2        | 0           | 0      | 560.872         | 6              | CCOC(=O)C1=C(N=C2C(C(=O)C)C)C3CCCC(C3)OC4CCCC(C4)Br)OC              |
| ZINC08441564 | 6.86  | -0.12             | -14.32           | 0        | 6           | 0      | 560.872         | 8              | CCOC(=O)C1=C(N=C2C(C(=O)C)C)C3CCCC(C3)OC4CCCC(C4)Br)OC              |
| ZINC08441564 | 7.04  | -1.04             | -12.23           | 0        | 6           | 0      | 560.872         | 8              | CCOC(=O)C1=C(N=C2C(C(=O)C)C)C3CCCC(C3)OC4CCCC(C4)Br)OC              |
| ZINC08441563 | 7.1   | 0.23              | -6.12            | 0        | 3           | 0      | 447.724         | 2              | c1ccc(cc1C2=NN3[C@@H](C2)C4CCCC(C4)O)C5CC(C5)OC                     |
| ZINC0703077  | 3.05  | 10.05             | -55.55           | 0        | 9           | -1     | 504.515         | 8              | C([C@@H]1C2CC(CCC2)C(=O)C3=C(C(=O)N(C)C)C4CCCC(C4)OC)OC(C5CCCC5)O-  |
| ZINC0703077  | 3.5   | 0.6               | -32.28           | 1        | 9           | 0      | 505.523         | 7              | C([C@@H]1C2CC(CCC2)C(=O)C3=C(C(=O)N(C)C)C4CCCC(C4)OC)OC(C5CCCC5)O-  |
| ZINC0703077  | 2.47  | 0.84              | -26.81           | 0        | 9           | 0      | 505.523         | 8              | C([C@@H]1C2CC(CCC2)C(=O)C3=C(C(=O)N(C)C)C4CCCC(C4)OC)OC(C5CCCC5)O-  |
| ZINC08441562 | 7.1   | 0.1               | -5.84            | 0        | 3           | 0      | 447.724         | 2              | c1ccc(cc1C2=NN3[C@@H](C2)C4CCCC(C4)O)C5CC(C5)OC                     |
| ZINC08441561 | 7.34  | -0.97             | -9.69            | 0        | 3           | 0      | 451.378         | 2              | c1ccc(cc1C2=NN3[C@@H](C2)C4CCCC(C4)O)C5CC(C5)OC                     |
| ZINC0703078  | 3.05  | 10.06             | -58.07           | 0        | 9           | -1     | 504.515         | 8              | C([C@@H]1C2CC(CCC2)C(=O)C3=C(C(=O)N(C)C)C4CCCC(C4)OC)OC(C5CCCC5)O-  |
| ZINC0703078  | 3.5   | 1.06              | -29.62           | 1        | 9           | 0      | 505.523         | 7              | C([C@@H]1C2CC(CCC2)C(=O)C3=C(C(=O)N(C)C)C4CCCC(C4)OC)OC(C5CCCC5)O-  |
| ZINC0703078  | 2.47  | 1.29              | -21.83           | 0        | 9           | 0      | 505.523         | 8              | C([C@@H]1C2CC(CCC2)C(=O)C3=C(C(=O)N(C)C)C4CCCC(C4)OC)OC(C5CCCC5)O-  |
| ZINC08441560 | 7.34  | -0.91             | -8.76            | 0        | 3           | 0      | 451.378         | 2              | c1ccc(cc1C2=NN3[C@@H](C2)C4CCCC(C4)O)C5CC(C5)OC                     |
| ZINC08441559 | 6.86  | 0.08              | -10.96           | 2        | 0           | 0      | 560.872         | 6              | CCOC(=O)C1=C(N=C2C(C(=O)C)C)C3CCCC(C3)OC4CCCC(C4)Br)OC              |
| ZINC08441559 | 6.86  | -0.12             | -14.45           | 0        | 6           | 0      | 560.872         | 8              | CCOC(=O)C1=C(N=C2C(C(=O)C)C)C3CCCC(C3)OC4CCCC(C4)Br)OC              |
| ZINC08441559 | 7.04  | -1.03             | -12.32           | 0        | 6           | 0      | 560.872         | 8              | CCOC(=O)C1=C(N=C2C(C(=O)C)C)C3CCCC(C3)OC4CCCC(C4)Br)OC              |
| ZINC08441558 | 6.16  | -0.94             | -10.21           | 0        | 4           | 0      | 446.337         | 2              | c1ccc(cc1C2=NN3[C@@H](C2)C4CCCC(C4)O)C5CC(C5)OC                     |
| ZINC0703079  | 3.05  | 9.98              | -54.5            | 0        | 9           | -1     | 504.515         | 8              | C([C@@H]1C2CC(CCC2)C(=O)C3=C(C(=O)N(C)C)C4CCCC(C4)OC)OC(C5CCCC5)O-  |
| ZINC0703079  | 3.5   | 0.69              | -29.01           | 1        | 9           | 0      | 505.523         | 7              | C([C@@H]1C2CC(CCC2)C(=O)C3=C(C(=O)N(C)C)C4CCCC(C4)OC)OC(C5CCCC5)O-  |
| ZINC0703079  | 2.47  | 0.93              | -22.88           | 0        | 9           | 0      | 505.523         | 8              | C([C@@H]1C2CC(CCC2)C(=O)C3=C(C(=O)N(C)C)C4CCCC(C4)OC)OC(C5CCCC5)O-  |
| ZINC08441557 | 6.16  | -0.52             | -8.19            | 0        | 4           | 0      | 446.337         | 2              | c1ccc(cc1C2=NN3[C@@H](C2)C4CCCC(C4)O)C5CC(C5)OC                     |
| ZINC06475516 | 5.68  | 11.98             | -9.32            | 0        | 4           | 0      | 456.343         | 2              | c1ccc(cc1C2=NN3[C@@H](C2)C4CCCC(C4)O)C5CC(C5)OC                     |
| ZINC06475513 | 5.68  | 12.18             | -7.92            | 0        | 4           | 0      | 456.343         | 2              | c1ccc(cc1C2=NN3[C@@H](C2)C4CCCC(C4)O)C5CC(C5)OC                     |
| ZINC08441556 | 8.22  | -0.48             | -6.55            | 0        | 3           | 0      | 548.278         | 2              | C([C@@H]1N2[C@@H](CC(=N2)C3CCCC(C3)OC)OC(C4CCCC4)Br)OC(C5CCCC5)O-   |
| ZINC08441555 | 8.22  | -0.82             | -7.11            | 0        | 3           | 0      | 548.278         | 2              | C([C@@H]1N2[C@@H](CC(=N2)C3CCCC(C3)OC)OC(C4CCCC4)Br)OC(C5CCCC5)O-   |
| ZINC0703080  | 3.05  | 10.02             | -58.5            | 0        | 9           | -1     | 504.515         | 8              | C([C@@H]1C2CC(CCC2)C(=O)C3=C(C(=O)N(C)C)C4CCCC(C4)OC)OC(C5CCCC5)O-  |
| ZINC0703080  | 3.5   | 1.18              | -32.94           | 1        | 9           | 0      | 505.523         | 7              | C([C@@H]1C2CC(CCC2)C(=O)C3=C(C(=O)N(C)C)C4CCCC(C4)OC)OC(C5CCCC5)O-  |
| ZINC0703080  | 2.47  | 1.4               | -23.73           | 0        | 9           | 0      | 505.523         | 8              | C([C@@H]1C2CC(CCC2)C(=O)C3=C(C(=O)N(C)C)C4CCCC(C4)OC)OC(C5CCCC5)O-  |
| ZINC08441554 | 6.5   | 0.59              | -10.45           | 2        | 0           | 0      | 540.454         | 6              | CC1=NC2=C([C@@H](C1C(=O)OCCOC3CCCC3)C4CCCC(C4)OC)OC(C(=O)CC(C2)(C(C |
| ZINC08441554 | 6.69  | 1.75              | -10.92           | 0        | 6           | 0      | 540.454         | 7              | CC1(CC2=NC(=C)C([C@@H](C2C(=O)C1)C3CCCC(C3)OC)OC(C(=O)OCCOC4CCCC4)C |
| ZINC08441554 | 6.69  | 0.68              | -11.28           | 0        | 6           | 0      | 540.454         | 7              | CC1(CC2=NC(=C)C([C@@H](C2C(=O)C1)C3CCCC(C3)OC)OC(C(=O)OCCOC4CCCC4)C |
| ZINC08441554 | 6.5   | 0.72              | -13.7            | 0        | 6           | 0      | 540.454         | 7              | CC1=C([C@@H](C2C(=O)C1)C3CCCC(C3)OC)OC(C(=O)OCCOC4CCCC4)C           |
| ZINC15885021 | 1.88  | 5.87              | -61.77           | 1        | 9           | -1     | 462.434         | 6              | COc1ccc(cc1O)[C@@H]2C(C(=O)N2C3CCCC3)O-]C(=O)C4CCCC(C4)OCCO5        |
| ZINC08441553 | 4.45  | 1.38              | -23              | 0        | 7           | 0      | 514.401         | 6              | CC1=NN(C(=O)C1)C=C2CC(C2)OC)OC)C3CC(C3)C4CCCC(C4)Br                 |

**Supplementary Table S2:**  
**Detailed table of XP Docking using Schrodinger's Glide module**

| ZINC_ID      | xLogP | ApolarDesolvation | PolarDesolvation | H Donors | H Acceptors | Charge | MolecularWeight | RotatableBonds | SMILES                                                                          |
|--------------|-------|-------------------|------------------|----------|-------------|--------|-----------------|----------------|---------------------------------------------------------------------------------|
| ZINC15885023 | 1.88  | 5.56              | -60.77           | 1        | 9           | -1     | 462.434         | 6              | Coc1ccc(cc1O)[C@@H]2C=C(C(=O)N2Cc3ccc3)[O-][C]=O)c4ccc5c(c4)OCCO5               |
| ZINC00863328 | 3.75  | 1.16              | -17.9            | 0        | 5           | 0      | 459.365         | 3              | CN(C)c1ccc(cc1)[C@@H]2N(CCS2)C(=O)c3cc4ccc(ccc4oc3=O)Br                         |
| ZINC00863329 | 3.75  | 1.06              | -17.75           | 0        | 5           | 0      | 459.365         | 3              | CN(C)c1ccc(cc1)[C@@H]2N(CCS2)C(=O)c3cc4ccc(ccc4oc3=O)Br                         |
| ZINC00971705 | 4.62  | 0.34              | -20.32           | 1        | 4           | 0      | 451.114         | 3              | C[C@@H](c1ccccc1)NC(=O)c2cc3ccc(cc3oc2=O)Br]Br                                  |
| ZINC13123302 | 2.76  | 7.36              | -57.93           | 1        | 8           | -1     | 460.462         | 6              | C[C@@H]1Cc2cc(ccc2O1)C(=O)C3=C(C(=O)N1[C@@H]3c4ccc(c4)OC)O)Cc5ccc5[O-]          |
| ZINC00971704 | 4.62  | 0.34              | -20.34           | 1        | 4           | 0      | 451.114         | 3              | C[C@@H](c1ccccc1)NC(=O)c2cc3ccc(cc3oc2=O)Br]Br                                  |
| ZINC13123301 | 2.76  | 6.97              | -61.33           | 1        | 8           | -1     | 460.462         | 6              | C[C@@H]1Cc2cc(ccc2O1)C(=O)C3=C(C(=O)N1[C@@H]3c4ccc(c4)OC)O)Cc5ccc5[O-]          |
| ZINC08441551 | 6.5   | 0.7               | -10.07           | 2        | 0           | 0      | 540.454         | 6              | CC1=NC2=C([C@@H]([C1C(=O)OC]c3ccc(c(c3)C)O)c4ccc(c4)Br)OC(C)=O)CC(C2)(C)C       |
| ZINC08441551 | 6.5   | 0.65              | -13.06           | 0        | 6           | 0      | 540.454         | 7              | CC1=C([C@@H]([C@@H]2[C(=N1)]C(C2=O)[C]C)c3ccc(c(c3)C)O)c4ccc(c4)Br)OC(C)=O)OC   |
| ZINC08441551 | 6.69  | 0.76              | -10.66           | 0        | 6           | 0      | 540.454         | 7              | CC1(C2=NC(=C)C([C@@H]([C2C(=O)C1]c3ccc(c(c3)C)O)c4ccc(c4)Br)OC(C)=O)OC          |
| ZINC08441551 | 6.69  | 1.92              | -12.84           | 0        | 6           | 0      | 540.454         | 7              | CC1(C2=NC(=C)C([C@@H]([C@@H]2[C(=O)C1]c3ccc(c(c3)C)O)c4ccc(c4)Br)OC(C)=O)OC     |
| ZINC06444168 | 5.48  | 13.24             | -16.12           | 1        | 6           | 0      | 513.022         | 7              | Cc1ccccc1NC(=O)c2c(nc(c2c3ccc3)C#N)SCC(=O)c4ccc(cc4)Cl                          |
| ZINC13123303 | 2.76  | 7                 | -60.87           | 1        | 8           | -1     | 460.462         | 6              | C[C@@H]1Cc2cc(ccc2O1)C(=O)C3=C(C(=O)N1[C@@H]3c4ccc(c4)OC)O)Cc5ccc5[O-]          |
| ZINC00703067 | 5.15  | 13.53             | -46.78           | 0        | 7           | -1     | 506.534         | 7              | C[C@@H]1Cc2cc(ccc2O1)C(=O)C3=C(C(=O)N1[C@@H]3c4ccc(c4)OC)c5ccc5[O-]             |
| ZINC00703067 | 5.6   | 0.48              | -29.14           | 1        | 7           | 0      | 507.542         | 6              | C[C@@H]1Cc2cc(ccc2O1)C(=O)C3=C(C(=O)N1[C@@H]3c4ccc(c4)OC)c5ccc5[O-]             |
| ZINC00703067 | 4.57  | 0.75              | -23.14           | 0        | 7           | 0      | 507.542         | 7              | C[C@@H]1Cc2cc(ccc2O1)C(=O)C3=C(C(=O)N1[C@@H]3c4ccc(c4)OC)c5ccc5[O-]             |
| ZINC08441547 | 6.59  | 3.51              | -11.08           | 2        | 0           | 0      | 529.555         | 6              | CC1=NC2=C([C@@H]([C1C(=O)OC]c3ccc(c(c3)C)O)c4ccc(c4)Br)OC(C)=O)CC(C2)(C)C       |
| ZINC08441547 | 6.77  | 3.6               | -11.93           | 0        | 6           | 0      | 529.555         | 8              | CC1(C2=NC(=C)C([C@@H]([C2C(=O)C1]c3ccc(c(c3)C)O)c4ccc(c4)Br)OC(C)=O)OC          |
| ZINC08441547 | 6.77  | 4.67              | -11.56           | 0        | 6           | 0      | 529.555         | 8              | CC1(C2=NC(=C)C([C@@H]([C@@H]2[C(=O)C1]c3ccc(c(c3)C)O)c4ccc(c4)Br)OC(C)=O)OC     |
| ZINC08441547 | 6.59  | 3.65              | -14.32           | 0        | 6           | 0      | 529.555         | 8              | CC1=C([C@@H]([C@@H]2[C(=N1)]C(C2=O)[C]C)c3ccc(c(c3)C)O)c4ccc(c4)Br)OC(C)=O)OC   |
| ZINC00860537 | 4.82  | -0.84             | -14.44           | 1        | 6           | 0      | 428.517         | 7              | COC1ccc(cc1)NC(=O)CSc2nc(c2m2)c3ccc3c4c4ccc4                                    |
| ZINC00703068 | 5.15  | 13.56             | -46.19           | 0        | 7           | -1     | 506.534         | 7              | C[C@@H]1Cc2cc(ccc2O1)C(=O)C3=C(C(=O)N1[C@@H]3c4ccc(c4)OC)c5ccc5[O-]             |
| ZINC00703068 | 5.6   | 0.92              | -26.96           | 1        | 7           | 0      | 507.542         | 6              | C[C@@H]1Cc2cc(ccc2O1)C(=O)C3=C(C(=O)N1[C@@H]3c4ccc(c4)OC)c5ccc5[O-]             |
| ZINC00703068 | 4.57  | 1.15              | -18.04           | 0        | 7           | 0      | 507.542         | 7              | C[C@@H]1Cc2cc(ccc2O1)C(=O)C3=C(C(=O)N1[C@@H]3c4ccc(c4)OC)c5ccc5[O-]             |
| ZINC08974498 | 0.79  | 10.53             | -24.14           | 1        | 9           | 0      | 509.563         | 5              | Cc1cc(c(=O)c2c1cc(c2)F)N3CCN(CC3)C(=O)c4ccc4[O-]Nc5nc(es5)C                     |
| ZINC00703069 | 5.15  | 13.17             | -45.07           | 0        | 7           | -1     | 506.534         | 7              | C[C@@H]1Cc2cc(ccc2O1)C(=O)C3=C(C(=O)N1[C@@H]3c4ccc(c4)OC)c5ccc5[O-]             |
| ZINC00703069 | 5.6   | 0.63              | -27.89           | 1        | 7           | 0      | 507.542         | 6              | C[C@@H]1Cc2cc(ccc2O1)C(=O)C3=C(C(=O)N1[C@@H]3c4ccc(c4)OC)c5ccc5[O-]             |
| ZINC00703069 | 4.57  | 0.89              | -22.24           | 0        | 7           | 0      | 507.542         | 7              | C[C@@H]1Cc2cc(ccc2O1)C(=O)C3=C(C(=O)N1[C@@H]3c4ccc(c4)OC)c5ccc5[O-]             |
| ZINC08441546 | 3.71  | -0.81             | -29.25           | 1        | 9           | 0      | 629.758         | 6              | Cc1nc(c(=O)c2c1cc(c2)F)N3CCN(CC3)C(=O)c4ccc4[O-]Nc5nc(es5)C67C8C6(C6)CC(C8)C7   |
| ZINC00703070 | 5.15  | 13.2              | -44.8            | 0        | 7           | -1     | 506.534         | 7              | C[C@@H]1Cc2cc(ccc2O1)C(=O)C3=C(C(=O)N1[C@@H]3c4ccc(c4)OC)c5ccc5[O-]             |
| ZINC00703070 | 5.6   | 0.6               | -27.32           | 1        | 7           | 0      | 507.542         | 6              | C[C@@H]1Cc2cc(ccc2O1)C(=O)C3=C(C(=O)N1[C@@H]3c4ccc(c4)OC)c5ccc5[O-]             |
| ZINC00703070 | 4.57  | 0.89              | -21.82           | 0        | 7           | 0      | 507.542         | 7              | C[C@@H]1Cc2cc(ccc2O1)C(=O)C3=C(C(=O)N1[C@@H]3c4ccc(c4)OC)c5ccc5[O-]             |
| ZINC08441545 | 5.95  | -0.5              | -27.17           | 1        | 9           | 0      | 663.86          | 11             | CCCCC1cfc(c(=O)c2c1cc(c2)F)N3CCN(CC3)C(=O)OC(C)=O)Nc4nc(es4)C56C7C7(C5)CC(C7)C6 |
| ZINC08441543 | 4.13  | 0.96              | -17.23           | 1        | 9           | 0      | 533.577         | 11             | CCCCC1ccc(cc1OC)[C@@H]2C=C(C(=O)N2Cc3ccc3)O[C]=O)c4ccc5c(c4)OCCO5               |
| ZINC08441543 | 3.55  | 0.8               | -21.62           | 0        | 9           | 0      | 533.577         | 11             | CCCCC1ccc(cc1OC)[C@@H]2[C@@H](C(=O)N2Cc3ccc3)C(=O)c4ccc5c(c4)OCCO5              |
| ZINC08441542 | 6.59  | 3.63              | -11.16           | 2        | 0           | 0      | 529.555         | 6              | CC1=NC2=C([C@@H]([C1C(=O)OC]c3ccc(c(c3)C)O)c4ccc(c4)Br)OC(C)=O)CC(C2)(C)C       |
| ZINC08441542 | 6.77  | 3.69              | -11.64           | 0        | 6           | 0      | 529.555         | 8              | CC1(C2=NC(=C)C([C@@H]([C2C(=O)C1]c3ccc(c(c3)C)O)c4ccc(c4)Br)OC(C)=O)OC          |
| ZINC08441542 | 6.77  | 4.86              | -13.63           | 0        | 6           | 0      | 529.555         | 8              | CC1(C2=NC(=C)C([C@@H]([C@@H]2[C(=O)C1]c3ccc(c(c3)C)O)c4ccc(c4)Br)OC(C)=O)OC     |
| ZINC08441542 | 6.59  | 3.58              | -13.97           | 0        | 6           | 0      | 529.555         | 8              | CC1=C([C@@H]([C@@H]2[C(=N1)]C(C2=O)[C]C)c3ccc(c(c3)C)O)c4ccc(c4)Br)OC(C)=O)OC   |
| ZINC01261828 | 1.93  | 14.35             | -26.24           | 1        | 9           | 0      | 595.1           | 7              | CCCC1nc(s1)NC(=O)c2nc(c3cc(c2)F)N4CCN(CC4)C(=O)c5ccc5[O-]C6CC6                  |
| ZINC08441540 | 4.13  | 1.14              | -19.07           | 1        | 9           | 0      | 533.577         | 11             | CCCCC1ccc(cc1OC)[C@@H]2C=C(C(=O)N2Cc3ccc3)O[C]=O)c4ccc5c(c4)OCCO5               |
| ZINC08441540 | 3.55  | 0.97              | -24.48           | 0        | 9           | 0      | 533.577         | 11             | CCCCC1ccc(cc1OC)[C@@H]2[C@@H](C(=O)N2Cc3ccc3)C(=O)c4ccc5c(c4)OCCO5              |
| ZINC00859989 | 3.45  | 0.9               | -19.34           | 1        | 9           | 0      | 431.832         | 6              | COc1ccc(cc1OC)C=C2/C(=O)NN(C2=O)c3ccc(c(c3)C)C]N+([=O])O-                       |
| ZINC13123054 | 2.58  | 7.59              | -61.24           | 0        | 9           | -1     | 476.461         | 7              | COc1ccc(cc1OC)[C@@H]2C=C(C(=O)N2Cc3ccc3)O[C]=O)c4ccc5c(c4)OCCO5                 |
| ZINC08441539 | 6.97  | 3.89              | -11.13           | 2        | 0           | 0      | 543.582         | 6              | CCOC(=O)C1[C@@H]([C2=C(C(C2=O)[C]C)N=C1C)c3ccc(c(c3)C)O)c4ccc(c4)Br)OC(C)=O)OC  |
| ZINC08441539 | 7.15  | 2.95              | -11.86           | 0        | 6           | 0      | 543.582         | 9              | CCOC(=O)C1[C@@H]([C2C(=NC1=O)CC(C2=O)[C]C)c3ccc(c(c3)C)O)c4ccc(c4)Br)OC(C)=O)OC |
| ZINC08441539 | 6.97  | 3.87              | -13.98           | 0        | 6           | 0      | 543.582         | 9              | CCOC(=O)C1=C(N=C2C(C(C2=O)C)C)C[C@@H]3c3ccc(c(c3)C)O)c4ccc(c4)Br)OC(C)=O)OC     |
| ZINC08441538 | 3.17  | 2.22              | -10.45           | 0        | 6           | 0      | 417.259         | 2              | Cc1cc(c(cc1Br)C2ccc2)C=C3(C(=O)N(C3=O)N(C3=O)C)C                                |
| ZINC13123055 | 2.58  | 6.88              | -62.07           | 0        | 9           | -1     | 476.461         | 7              | COc1ccc(cc1OC)[C@@H]2C=C(C(=O)N2Cc3ccc3)O[C]=O)c4ccc5c(c4)OCCO5                 |
| ZINC08441537 | 7.82  | 2.11              | -9               | 1        | 4           | 0      | 479.649         | 4              | Cc1ccc2c(c1)cc(n2)c3ccc3C(=O)Nc4c(c5c4)C[C@@H]([C5])C(C)C#N                     |
| ZINC08441536 | 7.82  | 2.11              | -9.06            | 1        | 4           | 0      | 479.649         | 4              | Cc1ccc2c(c1)cc(n2)c3ccc3C(=O)Nc4c(c5c4)C[C@@H]([C5])C(C)C#N                     |
| ZINC08441535 | 6.97  | 3.9               | -11.07           | 2        | 0           | 0      | 543.582         | 6              | CCOC(=O)C1[C@@H]([C2=C(C(C2=O)[C]C)N=C1C)c3ccc(c(c3)C)O)c4ccc(c4)Br)OC(C)=O)OC  |
| ZINC08441535 | 6.97  | 3.54              | -13.88           | 0        | 6           | 0      | 543.582         | 9              | CCOC(=O)C1=C(N=C2C(C(C2=O)C)C)C[C@@H]3c3ccc(c(c3)C)O)c4ccc(c4)Br)OC(C)=O)OC     |
| ZINC08441535 | 7.15  | 2.63              | -11.75           | 0        | 6           | 0      | 543.582         | 9              | CCOC(=O)C1[C@@H]([C2C(=NC1=O)CC(C2=O)[C]C)c3ccc(c(c3)C)O)c4ccc(c4)Br)OC(C)=O)OC |
| ZINC02064202 | 6.28  | 2.06              | -9.73            | 0        | 4           | 0      | 460.327         | 6              | Cc1ccc(cc1)c2ccc(c3ccn2)Br[C](=O)OC(C)=O)c4ccc4                                 |
| ZINC08441534 | 4.26  | 10.67             | -61.57           | 0        | 8           | -1     | 506.575         | 10             | CCCCC1ccc(cc1)[C@@H]2C=C(C(=O)N2C[C@@H]3CCO3)[O-][C]=O)c4ccc5c(c4)OCCO5         |
| ZINC08441534 | 4.71  | -1.7              | -26.48           | 1        | 8           | 0      | 507.583         | 9              | CCCCC1ccc(cc1)[C@@H]2C=C(C3ccc4(c3)OCCO4)O[C]=O)N2C[C@@H]5CCO5                  |
| ZINC08441534 | 3.68  | -1.47             | -18.27           | 0        | 8           | 0      | 507.583         | 10             | CCCCC1ccc(cc1)[C@@H]2[C@@H](C(=O)N2C[C@@H]3CCO3)C(=O)c4ccc5c(c4)OCCO5           |
| ZINC02064200 | 6     | -2.15             | -19.24           | 3        | 8           | 0      | 567.667         | 11             | CCCCC1ccc(cc1)c2c(c(nc2C(=O)Nc3ccc3)SCC(=O)c4ccc(c4)O)C#N                       |
| ZINC08441533 | 4.26  | 10.62             | -64.01           | 0        | 8           | -1     | 506.575         | 10             | CCCCC1ccc(cc1)[C@@H]2C=C(C(=O)N2C[C@@H]3CCO3)[O-][C]=O)c4ccc5c(c4)OCCO5         |
| ZINC08441533 | 4.71  | -1.51             | -27.54           | 1        | 8           | 0      | 507.583         | 9              | CCCCC1ccc(cc1)[C@@H]2C=C(C3ccc4(c3)OCCO4)O[C]=O)N2C[C@@H]5CCO5                  |

**Supplementary Table S2:**  
**Detailed table of XP Docking using Schrodinger's Glide module**

| ZINC_ID      | sLogP | ApolarDesolvation | PolarDesolvation | H Donors | H Acceptors | Charge | MolecularWeight | RotatableBonds | SMILES                                                                               |
|--------------|-------|-------------------|------------------|----------|-------------|--------|-----------------|----------------|--------------------------------------------------------------------------------------|
| ZINC08441533 | 3.68  | -1.24             | -23.99           | 0        | 8           | 0      | 507.583         | 10             | CCCCOc1ccc(cc1)[C@@H]2[C@@H](C(=O)N2C[C@H]3CCCCO3)C(=O)c4ccc5c(c4)OCCO5              |
| ZINC08441532 | 6.21  | 4.78              | -11.75           | 2        | 1           | 0      | 504.512         | 6              | [H]/N=C/1\ C@@H(C2=CCCC[C@@H]2[C@@H](C1(C#N)C#N)c3ccc(c3)C0c4ccc(c4)C(F)(F)OC)C#N    |
| ZINC08441532 | 6.21  | 4.62              | -41.36           | 2        | 6           | 1      | 505.52          | 6              | C0c1ccc(cc1)C0c2ccc(c2)C(F)(F)F[C@@H]3[C@@H]4CCCC=C4[C@@H]([C]=[NH2+])C3(C#N)C#N]C#N |
| ZINC0858890  | 2.86  | -1.32             | -15.48           | 2        | 6           | 0      | 423.472         | 6              | c1ccc(cc1)C(c2ccc2)(C(=O)NN(c3ccc3)C(=O)c4ccc4)0                                     |
| ZINC08441530 | 4.26  | 10.59             | -66.17           | 0        | 8           | -1     | 506.575         | 10             | CCCCOc1ccc(cc1)[C@@H]2C(=C(C(=O)N2C[C@@H]3CCCCO3)[O-])C(=O)c4ccc5c(c4)OCCO5          |
| ZINC08441530 | 4.71  | -1.48             | -27.96           | 1        | 8           | 0      | 507.583         | 9              | CCCCOc1ccc(cc1)[C@@H]2C(=C(c3ccc4c(c3)OCCO4)O)C(=O)C(=O)N2C[C@@H]5CCCCO5             |
| ZINC08441530 | 3.68  | -1.22             | -25.66           | 0        | 8           | 0      | 507.583         | 10             | CCCCOc1ccc(cc1)[C@@H]2[C@@H](C(=O)N2C[C@@H]3CCCCO3)C(=O)c4ccc5c(c4)OCCO5             |
| ZINC08441529 | 6.21  | 4.73              | -12.34           | 2        | 1           | 0      | 504.512         | 6              | [H]/N=C/1\ C@@H(C2=CCCC[C@@H]2[C@@H](C1(C#N)C#N)c3ccc(c3)C0c4ccc(c4)C(F)(F)OC)C#N    |
| ZINC08441529 | 6.21  | 4.56              | -42.27           | 2        | 6           | 1      | 505.52          | 6              | C0c1ccc(cc1)C0c2ccc(c2)C(F)(F)F[C@@H]3[C@@H]4CCCC=C4[C@@H]([C]=[NH2+])C3(C#N)C#N]C#N |
| ZINC08441528 | 6.8   | 2.48              | -15.92           | 1        | 4           | 0      | 467.569         | 6              | Cc1ccc(cc1)c2cc(nc(c2C#N)S[C](=O)Nc3ccc(c3)C)c4ccc(cc4)F                             |
| ZINC08441527 | 7.24  | 2.93              | -15.38           | 1        | 4           | 0      | 481.596         | 7              | CCc1cccnc1NC(=O)CSc2c(c(cfn2)c3ccc(cc3)F)c4ccc(cc4)C]C#N                             |
| ZINC08441526 | 4.26  | 10.14             | -67.6            | 0        | 8           | -1     | 506.575         | 10             | CCCCOc1ccc(cc1)[C@@H]2C(=C(C(=O)N2C[C@@H]3CCCCO3)[O-])C(=O)c4ccc5c(c4)OCCO5          |
| ZINC08441526 | 4.71  | -1.72             | -26.38           | 1        | 8           | 0      | 507.583         | 9              | CCCCOc1ccc(cc1)[C@@H]2C(=C(c3ccc4c(c3)OCCO4)O)C(=O)C(=O)N2C[C@@H]5CCCCO5             |
| ZINC08441526 | 3.68  | -1.5              | -18.04           | 0        | 8           | 0      | 507.583         | 10             | CCCCOc1ccc(cc1)[C@@H]2[C@@H](C(=O)N2C[C@@H]3CCCCO3)C(=O)c4ccc5c(c4)OCCO5             |
| ZINC13161513 | 6.21  | 12.1              | -11.83           | 1        | 6           | 0      | 504.512         | 6              | [H]/N=C/1\ C@@H(C2=CCCC[C@@H]2[C@@H](C1(C#N)C#N)c3ccc(c3)C0c4ccc(c4)C(F)(F)OC)C#N    |
| ZINC08441524 | 6.37  | 2.17              | -16              | 1        | 4           | 0      | 453.542         | 6              | Cc1ccc(cc1)c2cc(nc(c2C#N)S[C](=O)Nc3ccc(c3)c4ccc(cc4)F                               |
| ZINC08441523 | 6.21  | 5.05              | -16.78           | 2        | 1           | 0      | 504.512         | 6              | [H]/N=C/1\ C@@H(C2=CCCC[C@@H]2[C@@H](C1(C#N)C#N)c3ccc(c3)C0c4ccc(c4)C(F)(F)OC)C#N    |
| ZINC08441523 | 6.21  | 4.88              | -35.99           | 2        | 6           | 1      | 505.52          | 6              | C0c1ccc(cc1)C0c2ccc(c2)C(F)(F)F[C@@H]3[C@@H]4CCCC=C4[C@@H]([C]=[NH2+])C3(C#N)C#N]C#N |
| ZINC08441522 | 5.14  | 12.12             | -59.85           | 0        | 7           | -1     | 504.603         | 10             | CCCCOc1ccc(cc1)[C@@H]2C(=C(C(=O)N2C[C@@H]3CCCCO3)[O-])C(=O)c4ccc5c(c4)C[C@@H](O5)C   |
| ZINC08441522 | 5.59  | -1.65             | -30.38           | 1        | 7           | 0      | 505.611         | 9              | CCCCOc1ccc(cc1)[C@@H]2C(=C(c3ccc4c(c3)C[C@@H](O4)C)O)C(=O)C(=O)N2C[C@@H]5CCCCO5      |
| ZINC08441522 | 4.56  | -1.38             | -25.26           | 0        | 7           | 0      | 505.611         | 10             | CCCCOc1ccc(cc1)[C@@H]2[C@@H](C(=O)N2C[C@@H]3CCCCO3)C(=O)c4ccc5c(c4)C[C@@H](O5)C      |
| ZINC08441521 | 6.31  | 1.19              | -18.6            | 1        | 7           | 0      | 525.63          | 10             | CCOc1ccc(cc1)NC(=O)CSc2c(c(cfn2)c3ccc(cc3)O)c4ccc(cc4)OC]C#N                         |
| ZINC08441520 | 2.99  | 8.59              | -12.3            | 3        | 8           | 0      | 445.57          | 10             | CCOC(=O)c1c(csc1NC(=O)CSc2[n]hnc2)C]C#Nc3ccc3)C]C                                    |
| ZINC08441519 | 2.11  | 16.82             | -40.2            | 2        | 4           | 1      | 425.339         | 5              | Cc1ccc(cc1)C]n+1]2c3ccc3n(c2N)CC(=O)c4ccc(cc4)C]C]                                   |
| ZINC08441518 | 5.14  | 12.08             | -62.21           | 0        | 7           | -1     | 504.603         | 10             | CCCCOc1ccc(cc1)[C@@H]2C(=C(C(=O)N2C[C@@H]3CCCCO3)[O-])C(=O)c4ccc5c(c4)C[C@@H](O5)C   |
| ZINC08441518 | 5.59  | -1.5              | -30.92           | 1        | 7           | 0      | 505.611         | 9              | CCCCOc1ccc(cc1)[C@@H]2C(=C(c3ccc4c(c3)C[C@@H](O4)C)O)C(=O)C(=O)N2C[C@@H]5CCCCO5      |
| ZINC08441518 | 4.56  | -1.28             | -21.44           | 0        | 7           | 0      | 505.611         | 10             | CCCCOc1ccc(cc1)[C@@H]2[C@@H](C(=O)N2C[C@@H]3CCCCO3)C(=O)c4ccc5c(c4)C[C@@H](O5)C      |
| ZINC08441517 | 5.94  | 2.85              | -11.82           | 2        | 0           | 0      | 501.501         | 6              | CC1=NC2=C([C@@H](C1C(=O)OC)C3ccc(c3)C)C0c4ccc(c4)C(F)(F)OC]C(=O)CC2                  |
| ZINC08441517 | 6.12  | 3.1               | -13.12           | 0        | 6           | 0      | 501.501         | 8              | C0c1ccc(cc1)C0c2ccc(c2)C(F)(F)F[C@@H]3[C@@H]4C(=NC(=O)C3C(=O)OC)CCCC4=O              |
| ZINC08441517 | 6.12  | 4.16              | -13.33           | 0        | 6           | 0      | 501.501         | 8              | C0c1ccc(cc1)C0c2ccc(c2)C(F)(F)F[C@@H]3[C@@H]4C(=NC(=O)C3C(=O)OC)CCCC4=O              |
| ZINC08441517 | 5.94  | 2.94              | -15.25           | 0        | 6           | 0      | 501.501         | 8              | CC1=C([C@@H]([C@@H]2C(=N1)CCCC2=O)c3ccc(c3)C0c4ccc(c4)C(F)(F)OC]C(=O)OC              |
| ZINC08441516 | 5.14  | 12.05             | -64.21           | 0        | 7           | -1     | 504.603         | 10             | CCCCOc1ccc(cc1)[C@@H]2C(=C(C(=O)N2C[C@@H]3CCCCO3)[O-])C(=O)c4ccc5c(c4)C[C@@H](O5)C   |
| ZINC08441516 | 5.59  | -1.46             | -30.96           | 1        | 7           | 0      | 505.611         | 9              | CCCCOc1ccc(cc1)[C@@H]2C(=C(c3ccc4c(c3)C[C@@H](O4)C)O)C(=O)C(=O)N2C[C@@H]5CCCCO5      |
| ZINC08441516 | 4.56  | -1.23             | -21.48           | 0        | 7           | 0      | 505.611         | 10             | CCCCOc1ccc(cc1)[C@@H]2[C@@H](C(=O)N2C[C@@H]3CCCCO3)C(=O)c4ccc5c(c4)C[C@@H](O5)C      |
| ZINC08441515 | 5.14  | 11.61             | -66              | 0        | 7           | -1     | 504.603         | 10             | CCCCOc1ccc(cc1)[C@@H]2C(=C(C(=O)N2C[C@@H]3CCCCO3)[O-])C(=O)c4ccc5c(c4)C[C@@H](O5)C   |
| ZINC08441515 | 5.59  | -1.7              | -30.97           | 1        | 7           | 0      | 505.611         | 9              | CCCCOc1ccc(cc1)[C@@H]2C(=C(c3ccc4c(c3)C[C@@H](O4)C)O)C(=O)C(=O)N2C[C@@H]5CCCCO5      |
| ZINC08441515 | 4.56  | -1.44             | -25.09           | 0        | 7           | 0      | 505.611         | 10             | CCCCOc1ccc(cc1)[C@@H]2[C@@H](C(=O)N2C[C@@H]3CCCCO3)C(=O)c4ccc5c(c4)C[C@@H](O5)C      |
| ZINC08441514 | 4.38  | -0.69             | -17.75           | 1        | 8           | 0      | 555.627         | 9              | C[C@@H]1Cc2cc(c2O1)C(=O)C3=C(C(=O)N(C[C@@H]3c4ccc(c4)OC)OC5ccc5)C[C@@H]6CCCCO6]0     |
| ZINC08441514 | 3.8   | -0.8              | -23.83           | 0        | 8           | 0      | 555.627         | 9              | C[C@@H]1Cc2cc(c2O1)C(=O)C3=C(C(=O)N(C[C@@H]3c4ccc(c4)OC)OC5ccc5)C[C@@H]6CCCCO6]0     |
| ZINC08441513 | 5.94  | 2.83              | -11.84           | 2        | 0           | 0      | 501.501         | 6              | CC1=NC2=C([C@@H](C1C(=O)OC)c3ccc(c3)C)C0c4ccc(c4)C(F)(F)OC]C(=O)CC2                  |
| ZINC08441513 | 6.12  | 2.89              | -12.64           | 0        | 6           | 0      | 501.501         | 8              | C0c1ccc(cc1)C0c2ccc(c2)C(F)(F)F[C@@H]3[C@@H]4C(=NC(=O)C3C(=O)OC)CCCC4=O              |
| ZINC08441513 | 6.12  | 4.31              | -18.53           | 0        | 6           | 0      | 501.501         | 8              | C0c1ccc(cc1)C0c2ccc(c2)C(F)(F)F[C@@H]3[C@@H]4C(=NC(=O)C3C(=O)OC)CCCC4=O              |
| ZINC08441513 | 5.94  | 2.77              | -15.33           | 0        | 6           | 0      | 501.501         | 8              | CC1=C([C@@H]([C@@H]2C(=N1)CCCC2=O)c3ccc(c3)C)C0c4ccc(c4)C(F)(F)OC]C(=O)OC            |
| ZINC0703060  | 4.38  | -0.99             | -18.45           | 1        | 8           | 0      | 555.627         | 9              | C[C@@H]1Cc2cc(c2O1)C(=O)C3=C(C(=O)N(C[C@@H]3c4ccc(c4)OC)OC5ccc5)C[C@@H]6CCCCO6]0     |
| ZINC0703060  | 3.8   | -1.15             | -24.52           | 0        | 8           | 0      | 555.627         | 9              | C[C@@H]1Cc2cc(c2O1)C(=O)C3=C(C(=O)N(C[C@@H]3c4ccc(c4)OC)OC5ccc5)C[C@@H]6CCCCO6]0     |
| ZINC01798315 | 0.99  | 14.26             | -29.73           | 2        | 5           | 1      | 340.447         | 9              | CCCCC[n+1]c2ccc2n(c1N)CC(=O)c3ccc3                                                   |
| ZINC08441512 | 4.38  | -1.16             | -19.01           | 1        | 8           | 0      | 555.627         | 9              | C[C@@H]1Cc2cc(c2O1)C(=O)C3=C(C(=O)N(C[C@@H]3c4ccc(c4)OC)OC5ccc5)C[C@@H]6CCCCO6]0     |
| ZINC08441512 | 3.8   | -1.29             | -27.42           | 0        | 8           | 0      | 555.627         | 9              | C[C@@H]1Cc2cc(c2O1)C(=O)C3=C(C(=O)N(C[C@@H]3c4ccc(c4)OC)OC5ccc5)C[C@@H]6CCCCO6]0     |
| ZINC00241369 | -1.59 | 10.38             | -29.19           | 2        | 5           | 1      | 270.312         | 4              | CC[n+1]c2ccc2n(c1N)CC(=O)c3ccc3                                                      |
| ZINC08441511 | 7.51  | 0.68              | -9.9             | 2        | 0           | 0      | 589.926         | 6              | CCOC(=O)C1[C@@H](C2=C(C(C(=O)2)O)C)C]N=C1C)c3ccc(c3)C0c4ccc(cc4)Br]OC                |
| ZINC08441511 | 7.51  | 0.6               | -13.45           | 0        | 6           | 0      | 589.926         | 8              | CCOC(=O)C1=C(N=C2C(C(C(=O)2)C)C[C@@H]1c3ccc(c3)C0c4ccc(cc4)Br]OC]C]C]C               |
| ZINC08441511 | 7.69  | -0.5              | -10.32           | 0        | 6           | 0      | 589.926         | 8              | CCOC(=O)C1[C@@H](C2=C(NC1=O)C(C(=O)2)O)C]C)c3ccc(c3)C0c4ccc(cc4)Br]OC                |
| ZINC08441510 | 4.38  | -1.14             | -19.16           | 1        | 8           | 0      | 555.627         | 9              | C[C@@H]1Cc2cc(c2O1)C(=O)C3=C(C(=O)N(C[C@@H]3c4ccc(c4)OC)OC5ccc5)C[C@@H]6CCCCO6]0     |
| ZINC08441510 | 3.8   | -1.24             | -27.54           | 0        | 8           | 0      | 555.627         | 9              | C[C@@H]1Cc2cc(c2O1)C(=O)C3=C(C(=O)N(C[C@@H]3c4ccc(c4)OC)OC5ccc5)C[C@@H]6CCCCO6]0     |
| ZINC06406305 | 4.85  | 9.05              | -59.76           | 1        | 5           | -1     | 463.307         | 4              | Cc1ccc(cc1)C(=O)C2=C(C(=O)N(C[C@@H]2c3ccc(cc3)Br)c4ccc(cc4)O)]O-                     |
| ZINC06406732 | 4.85  | 8.99              | -59.8            | 1        | 5           | -1     | 463.307         | 4              | CCOC(=O)C1=C(=O)C2=C(C(=O)N(C[C@@H]2c3ccc(cc3)Br)c4ccc(cc4)O)]O-                     |
| ZINC06406308 | 4.72  | 8.94              | -59.88           | 1        | 5           | -1     | 418.856         | 4              | Cc1ccc(cc1)C(=O)C2=C(C(=O)N(C[C@@H]2c3ccc(cc3)C)c4ccc(cc4)O)]O-                      |
| ZINC06406737 | 4.72  | 8.89              | -59.95           | 1        | 5           | -1     | 418.856         | 4              | Cc1ccc(cc1)C(=O)C2=C(C(=O)N(C[C@@H]2c3ccc(cc3)C)c4ccc(cc4)O)]O-                      |
| ZINC08441509 | 4.22  | -0.8              | -13.97           | 1        | 8           | 0      | 521.61          | 10             | CCCCOc1ccc(cc1)C[C@@H]2C(=C(C(=O)N2C[C@@H]3CCCCO3)O)C(=O)c4ccc5c(c4)C[C@@H](O5)C     |
| ZINC08441509 | 3.64  | -0.97             | -17.9            | 0        | 8           | 0      | 521.61          | 10             | CCCCOc1ccc(cc1)C[C@@H]2[C@@H](C(=O)N2C[C@@H]3CCCCO3)C(=O)c4ccc5c(c4)C[C@@H](O5)C     |
| ZINC08441508 | 7.51  | 0.86              | -10.28           | 2        | 0           | 0      | 589.926         | 6              | CCOC(=O)C1[C@@H](C2=C(C(C(=O)2)O)C)C]N=C1C)c3ccc(c3)C0c4ccc(cc4)Br]OC                |

**Supplementary Table S2:  
Detailed table of XP Docking using Schrodinger's Glide module**

| ZINC_ID      | sLogP | ApolarDesolvation | PolarDesolvation | H Donors | H Acceptors | Charge | MolecularWeight | RotatableBonds | SMILES                                                                             |
|--------------|-------|-------------------|------------------|----------|-------------|--------|-----------------|----------------|------------------------------------------------------------------------------------|
| ZINC08441508 | 7.51  | 0.5               | -12.97           | 0        | 6           | 0      | 588.926         | 8              | CCOC(=O)C1=C(N=C2CC(C(=O)C2)C@@H)1c3ccc(c(c3)CO4ccc(cc4)Br)OC(C)C                  |
| ZINC08441508 | 7.69  | -0.41             | -10.59           | 0        | 6           | 0      | 588.926         | 8              | CCOC(=O)C1[C@@H](C2C=NC1=C(C(=O)C2)C)C3ccc(c(c3)CO4ccc(cc4)Br)OC                   |
| ZINC08441505 | 4.22  | -0.77             | -17.06           | 1        | 8           | 0      | 521.61          | 10             | CCCCOc1ccc(cc1OC)[C@@H]2[C@@H](C(=O)N2C)C@H)3CCOC3)O(C)=O)c4ccc5c(c4)C[C@@H](O5)C  |
| ZINC08441505 | 3.64  | -0.85             | -24.6            | 0        | 8           | 0      | 521.61          | 10             | CCCCOc1ccc(cc1OC)[C@@H]2[C@@H](C(=O)N2C)C@H)3CCOC3)C(=O)c4ccc5c(c4)C[C@@H](O5)C    |
| ZINC08441504 | 4.22  | 11.24             | -63.97           | 0        | 8           | -1     | 520.602         | 10             | CCCCOc1ccc(cc1OC)[C@@H]2[C@@H](C(=O)N2C)C@H)3CCOC3)O-]C(=O)c4ccc5c(c4)C[C@@H](O5)C |
| ZINC08441504 | 4.67  | -1.02             | -27.28           | 1        | 8           | 0      | 521.61          | 9              | CCCCOc1ccc(cc1OC)[C@@H]2[C@@H](C(=O)N2C)C@H)3CCOC3)O(C)=O)c4ccc5c(c4)C[C@@H](O5)C  |
| ZINC08441504 | 3.64  | -0.75             | -22.45           | 0        | 8           | 0      | 521.61          | 10             | CCCCOc1ccc(cc1OC)[C@@H]2[C@@H](C(=O)N2C)C@H)3CCOC3)C(=O)c4ccc5c(c4)C[C@@H](O5)C    |
| ZINC08997319 | 4.16  | 12.74             | -53.96           | 0        | 7           | -1     | 472.546         | 5              | CCc1ccc(cc1)N2C(=O)/C=C/c3cc(n(c3)c4ccc(cc4)C)C(=O)O-]C(=O)N=C2S                   |
| ZINC08914574 | 4.61  | 14.13             | -50.36           | 0        | 5           | -1     | 442.564         | 4              | CCc1ccc(cc1)N2C(=O)/C=C/c3cc(n(c3)c4ccc(cc4)C)C(=O)N=C2=5]O-                       |
| ZINC0858028  | 4.52  | 14.49             | -50.75           | 0        | 7           | -1     | 500.6           | 7              | CCc1ccc(cc1)N2C(=O)/C=C/c3cc(n(c3)c4ccc(cc4)C)C(=O)OCC(C)/C(=NC2=5]O-              |
| ZINC08441503 | 5.9   | 2.21              | -11.83           | 1        | 0           | 0      | 487.955         | 6              | CCOC(=O)C1[C@@H](C2=C(C(=O)C2)C)C(N=C1)C3ccc(o3)CO4ccc(cc4)F                       |
| ZINC08441503 | 6.08  | 1.25              | -12.29           | 0        | 6           | 0      | 487.955         | 7              | CCOC(=O)C1[C@@H](C2=C(NC1=C)CC(C2=O)C)C3ccc(o3)CO4ccc(cc4)F                        |
| ZINC08441503 | 5.9   | 2.27              | -13.81           | 0        | 6           | 0      | 487.955         | 7              | CCOC(=O)C1=C(N=C2CC(C(=O)C2)C@H)1c3ccc(o3)CO4ccc(cc4)F(C)C                         |
| ZINC08441502 | 4.22  | 10.66             | -63.37           | 0        | 8           | -1     | 520.602         | 10             | CCCCOc1ccc(cc1OC)[C@@H]2[C@@H](C(=O)N2C)C@H)3CCOC3)O-]C(=O)c4ccc5c(c4)C[C@@H](O5)C |
| ZINC08441502 | 4.67  | -1.49             | -30.55           | 1        | 8           | 0      | 521.61          | 9              | CCCCOc1ccc(cc1OC)[C@@H]2[C@@H](C(=O)N2C)C@H)3CCOC3)O(C)=O)c4ccc5c(c4)C[C@@H](O5)C  |
| ZINC08441502 | 3.64  | -1.24             | -26.03           | 0        | 8           | 0      | 521.61          | 10             | CCCCOc1ccc(cc1OC)[C@@H]2[C@@H](C(=O)N2C)C@H)3CCOC3)C(=O)c4ccc5c(c4)C[C@@H](O5)C    |
| ZINC0858026  | 4.61  | 12.57             | -52.44           | 0        | 5           | -1     | 434.585         | 4              | CCc1ccc(cc1)N2C(=O)/C=C/c3cc(n(c3)C4CCCC4)C(=O)N=C2=5]O-                           |
| ZINC0858024  | 5.23  | 14.25             | -51.42           | 0        | 5           | -1     | 456.591         | 4              | CCc1ccc(cc1)N2C(=O)/C=C/c3cc(n(c3)c4ccc(cc4)C)C(=O)N=C2=5]O-                       |
| ZINC08441501 | 3.56  | -0.82             | -15.84           | 1        | 9           | 0      | 537.609         | 10             | CC(C)CCOc1ccc(cc1OC)[C@@H]2[C@@H](C(=O)N2C)C@H)3CCOC3)O(C)=O)c4ccc5c(c4)OCCO5      |
| ZINC08441501 | 2.98  | -0.98             | -19.82           | 0        | 9           | 0      | 537.609         | 10             | CC(C)CCOc1ccc(cc1OC)[C@@H]2[C@@H](C(=O)N2C)C@H)3CCOC3)C(=O)c4ccc5c(c4)OCCO5        |
| ZINC08441500 | 2.78  | 6.31              | -56.51           | 1        | 9           | -1     | 457.513         | 8              | CCc1nnc(s1)N-]S(=O)(=O)c2ccc(cc2)N/C=C/C(=O)c3ccc4(c3)OC04                         |
| ZINC08441500 | 2.78  | 5.92              | -57.46           | 1        | 9           | -1     | 457.513         | 8              | CCc1nnc(s1)N-]S(=O)(=O)c2ccc(cc2)N/C=C/C(=O)c3ccc4(c3)OC04                         |
| ZINC08441499 | 3.56  | -0.63             | -17.94           | 1        | 9           | 0      | 537.609         | 10             | CC(C)CCOc1ccc(cc1OC)[C@@H]2[C@@H](C(=O)N2C)C@H)3CCOC3)O(C)=O)c4ccc5c(c4)OCCO5      |
| ZINC08441499 | 2.98  | -0.74             | -23.58           | 0        | 9           | 0      | 537.609         | 10             | CC(C)CCOc1ccc(cc1OC)[C@@H]2[C@@H](C(=O)N2C)C@H)3CCOC3)C(=O)c4ccc5c(c4)OCCO5        |
| ZINC08441497 | 5.9   | 2.21              | -11.23           | 1        | 0           | 0      | 487.955         | 6              | CCOC(=O)C1[C@@H](C2=C(C(=O)C2)C)C(N=C1)C3ccc(o3)CO4ccc(cc4)F                       |
| ZINC08441497 | 5.9   | 1.94              | -16.39           | 0        | 6           | 0      | 487.955         | 7              | CCOC(=O)C1=C(N=C2CC(C(=O)C2)C@H)1c3ccc(o3)CO4ccc(cc4)F(C)C                         |
| ZINC08441497 | 6.08  | 0.92              | -13.85           | 0        | 6           | 0      | 487.955         | 7              | CCOC(=O)C1[C@@H](C2=C(NC1=C)CC(C2=O)C)C3ccc(o3)CO4ccc(cc4)F                        |
| ZINC08441496 | 3.56  | -0.85             | -19.61           | 1        | 9           | 0      | 537.609         | 10             | CC(C)CCOc1ccc(cc1OC)[C@@H]2[C@@H](C(=O)N2C)C@H)3CCOC3)O(C)=O)c4ccc5c(c4)OCCO5      |
| ZINC08441496 | 2.98  | -1.02             | -25.79           | 0        | 9           | 0      | 537.609         | 10             | CC(C)CCOc1ccc(cc1OC)[C@@H]2[C@@H](C(=O)N2C)C@H)3CCOC3)C(=O)c4ccc5c(c4)OCCO5        |
| ZINC08441495 | 4.12  | 11.74             | -59.9            | 1        | 7           | -1     | 457.535         | 7              | Cc1cc(nc(n1)N-]S(=O)(=O)c2ccc(cc2)N/C=C/C(=O)c3ccc4ccccc4)C3                       |
| ZINC08441495 | 4.12  | 11.35             | -60.84           | 1        | 7           | -1     | 457.535         | 7              | Cc1cc(nc(n1)N-]S(=O)(=O)c2ccc(cc2)N/C=C/C(=O)c3ccc4ccccc4)C3                       |
| ZINC08441494 | 5.24  | 0.28              | -12.81           | 1        | 7           | 0      | 456.527         | 5              | CC1=C(C(=O)N2C)C@H)3CCOC3)O(C)=O)c4ccc5c(c4)OCCO5                                  |
| ZINC08441493 | 3.02  | 3.25              | -52.77           | 1        | 9           | -1     | 457.463         | 9              | CCc1cc(nc(n1)OC)N-]S(=O)(=O)c2ccc(cc2)N/C=C/C(=O)c3ccc(cc3)F                       |
| ZINC08441493 | 3.02  | 2.86              | -53.66           | 1        | 9           | -1     | 457.463         | 9              | CCc1cc(nc(n1)OC)N-]S(=O)(=O)c2ccc(cc2)N/C=C/C(=O)c3ccc(cc3)F                       |
| ZINC08441492 | 3.56  | -1.16             | -19.88           | 1        | 9           | 0      | 537.609         | 10             | CC(C)CCOc1ccc(cc1OC)[C@@H]2[C@@H](C(=O)N2C)C@H)3CCOC3)O(C)=O)c4ccc5c(c4)OCCO5      |
| ZINC08441492 | 2.98  | -1.24             | -28.31           | 0        | 9           | 0      | 537.609         | 10             | CC(C)CCOc1ccc(cc1OC)[C@@H]2[C@@H](C(=O)N2C)C@H)3CCOC3)C(=O)c4ccc5c(c4)OCCO5        |
| ZINC0857663  | 5.59  | 13.57             | -15.29           | 0        | 6           | 0      | 452.588         | 6              | CCc1c2c3cc(c(c3)nc2n1)c4ccc4c5ccc(cc5)N(C)C)OC                                     |
| ZINC02064139 | 7     | 2.52              | -15.07           | 0        | 6           | 0      | 514.629         | 7              | CN(C)C1ccc(cc1)c2c3cc(c(c3)nc2n1)c4ccc4c5ccc(cc5)C6ccc(cc6)OC)OC                   |
| ZINC0857662  | 5.92  | 13.41             | -14.43           | 0        | 6           | 0      | 453.542         | 7              | CCc1c2c3cc(c(c3)nc2n1)c4ccc4c5ccc(cc5)OC)OC                                        |
| ZINC02064138 | 5.89  | 2.69              | -16.77           | 0        | 7           | 0      | 497.595         | 9              | CCc1c2c3cc(c(c3)nc2n1)c4ccc4c5ccc(cc5)OC)OC                                        |
| ZINC08441491 | 5.24  | 0.45              | -12.95           | 1        | 7           | 0      | 456.527         | 5              | CC1=C(C(=O)N2C)C@H)3CCOC3)O(C)=O)c4ccc5c(c4)OCCO5                                  |
| ZINC0857661  | 5.2   | 11.26             | -16.14           | 1        | 7           | 0      | 469.541         | 7              | CCc1c2c3cc(c(c3)nc2n1)c4ccc4c5ccc(cc5)OC)OC                                        |
| ZINC0857661  | 5.2   | 11.57             | -29.83           | 2        | 7           | -1     | 470.549         | 7              | CCc1c2c3cc(c(c3)nc2n1)c4ccc4c5ccc(cc5)OC)OC                                        |
| ZINC08441490 | 4.44  | 11.59             | -64.45           | 0        | 8           | -1     | 534.629         | 10             | C(C(=O)N2C)C@H)3CCOC3)O(C)=O)c4ccc5c(c4)OCCO5                                      |
| ZINC08441490 | 4.89  | -0.71             | -27.23           | 1        | 8           | 0      | 535.637         | 9              | C(C(=O)N2C)C@H)3CCOC3)O(C)=O)c4ccc5c(c4)OCCO5                                      |
| ZINC08441490 | 3.86  | -0.43             | -22.3            | 0        | 8           | 0      | 535.637         | 10             | C(C(=O)N2C)C@H)3CCOC3)O(C)=O)c4ccc5c(c4)OCCO5                                      |
| ZINC08441489 | 5.67  | 0.15              | -11.89           | 1        | 8           | 0      | 500.58          | 7              | CCOC(=O)C1=C(N=C2N(C(=O)C2)C)C(N=C1)C3ccc(o3)CO4ccc(cc4)F                          |
| ZINC0857660  | 5.35  | 2.25              | -15.21           | 0        | 6           | 0      | 439.515         | 6              | CCOC(=O)C1=C(N=C2N(C(=O)C2)C)C(N=C1)C3ccc(o3)CO4ccc(cc4)F                          |
| ZINC08441488 | 4.44  | 11.62             | -64.22           | 0        | 8           | -1     | 534.629         | 10             | C(C(=O)N2C)C@H)3CCOC3)O(C)=O)c4ccc5c(c4)OCCO5                                      |
| ZINC08441488 | 4.89  | -1.02             | -32.1            | 1        | 8           | 0      | 535.637         | 9              | C(C(=O)N2C)C@H)3CCOC3)O(C)=O)c4ccc5c(c4)OCCO5                                      |
| ZINC08441488 | 3.86  | -0.79             | -22.93           | 0        | 8           | 0      | 535.637         | 10             | C(C(=O)N2C)C@H)3CCOC3)O(C)=O)c4ccc5c(c4)OCCO5                                      |
| ZINC04180918 | 4.74  | 11.22             | -20.16           | 1        | 4           | 0      | 439.353         | 1              | CC(=O)N1c2ccc2NC3=C(C(=O)N2)C@H)3CCOC3)O(C)=O)c4ccc5c(c4)OCCO5                     |
| ZINC08441487 | 5.67  | -0.02             | -12.35           | 1        | 8           | 0      | 500.58          | 7              | CCOC(=O)C1=C(N=C2N(C(=O)C2)C)C(N=C1)C3ccc(o3)CO4ccc(cc4)F                          |
| ZINC00703059 | 4.44  | 11.35             | -64.61           | 0        | 8           | -1     | 534.629         | 10             | C(C(=O)N2C)C@H)3CCOC3)O(C)=O)c4ccc5c(c4)OCCO5                                      |
| ZINC00703059 | 4.89  | -1.18             | -30.44           | 1        | 8           | 0      | 535.637         | 9              | C(C(=O)N2C)C@H)3CCOC3)O(C)=O)c4ccc5c(c4)OCCO5                                      |
| ZINC00703059 | 3.86  | -0.93             | -25.95           | 0        | 8           | 0      | 535.637         | 10             | C(C(=O)N2C)C@H)3CCOC3)O(C)=O)c4ccc5c(c4)OCCO5                                      |
| ZINC04180917 | 4.74  | 11.2              | -20.53           | 1        | 4           | 0      | 439.353         | 1              | CC(=O)N1c2ccc2NC3=C(C(=O)N2)C@H)3CCOC3)O(C)=O)c4ccc5c(c4)OCCO5                     |
| ZINC09334009 | 5.42  | 11.38             | -17.88           | 2        | 6           | 0      | 482.58          | 5              | CC1(C2=C(C(=O)N2)C@H)3CCOC3)O(C)=O)c4ccc5c(c4)OCCO5                                |
| ZINC08441484 | 5.72  | 0.39              | -13.7            | 1        | 8           | 0      | 513.623         | 7              | CCOC(=O)C1=C(N=C2N(C(=O)C2)C)C(N=C1)C3ccc(o3)CO4ccc(cc4)F                          |
| ZINC08441483 | 4.44  | 11.39             | -64.12           | 0        | 8           | -1     | 534.629         | 10             | C(C(=O)N2C)C@H)3CCOC3)O(C)=O)c4ccc5c(c4)OCCO5                                      |
| ZINC08441483 | 4.89  | -1.2              | -31.64           | 1        | 8           | 0      | 535.637         | 9              | C(C(=O)N2C)C@H)3CCOC3)O(C)=O)c4ccc5c(c4)OCCO5                                      |



Supplementary Table S2:

Detailed table of XP Docking using Schrodinger's Glide module

| ZINC_ID      | sLogP | ApolarDesolvation | PolarDesolvation | H Donors | H Acceptors | Charge | MolecularWeight | RotatableBonds | SMILES                                                                                    |
|--------------|-------|-------------------|------------------|----------|-------------|--------|-----------------|----------------|-------------------------------------------------------------------------------------------|
| ZINC08441483 | 3.86  | -0.97             | -24.02           | 0        | 8           | 0      | 535.637         | 10             | C[C@@H]1Cc2cc(ccc2O1)C(=O)C[C@@H]3[C@@H](N(C(=O)C3=O)C[C@@H]4CCCCO4)c5ccc(c1c5)OC10CC(C)C |
| ZINC09334008 | 5.42  | 11.38             | -18.46           | 2        | 6           | 0      | 482.58          | 5              | CC1(CC2=C(C[C@@H]1Nc3ccc(cc3N2)C(=O)c4cccc4)c5ccc(c1c5)OC1OC)C(=O)C1C                     |
| ZINC08441482 | 6.45  | -0.08             | -11.47           | 2        | 4           | 0      | 456.973         | 3              | CC1(CC2=C(C[C@@H]1Nc3ccc(cc3N2)C(=O)c4cccc4)c5ccc(c1c5)OC)C(=O)C1C                        |
| ZINC08441481 | 5.72  | 0.23              | -13.52           | 1        | 8           | 0      | 513.623         | 7              | CCOC(=O)C1=C(N=c2n(c1=O)/c=C/c3c[nH]nc3c4cccc4)/s2)C[C@@H]1c5ccc(cc5)N(C)C                |
| ZINC08441480 | 4.79  | 12.64             | -66.77           | 0        | 7           | -1     | 524.593         | 8              | C[C@@H]1Cc2cc(ccc2O1)C(=O)C3=C(C(=O)N(C[C@@H]3c4ccc(cc4)OC5cccc5)C[C@@H]6CCCCO6)[O-]      |
| ZINC08441480 | 5.24  | -1.62             | -32.27           | 1        | 7           | 0      | 525.601         | 7              | C[C@@H]1Cc2cc(ccc2O1)C(=O)C3=C(C(=O)N(C[C@@H]3c4ccc(cc4)OC5cccc5)C[C@@H]6CCCCO6)O         |
| ZINC08441480 | 4.21  | -1.39             | -22.85           | 0        | 7           | 0      | 525.601         | 8              | C[C@@H]1Cc2cc(ccc2O1)C(=O)C[C@@H]3[C@@H](N(C(=O)C3=O)C[C@@H]4CCCCO4)c5ccc(cc5)OC6cccc6    |
| ZINC08441479 | 6.45  | -0.09             | -10.01           | 2        | 4           | 0      | 456.973         | 3              | CC1(CC2=C(C[C@@H]1Nc3ccc(cc3N2)C(=O)c4cccc4)c5ccc(cc5)OC)C(=O)C1C                         |
| ZINC0857639  | 5.55  | 2.42              | -21.59           | 1        | 5           | 0      | 466.581         | 4              | CC(=O)N1c2cccc2NC3=C(C[C@@H]1c4cccc4OC5cccc5)C(=O)CC(C3)C                                 |
| ZINC08441478 | 4.79  | 12.67             | -66.54           | 0        | 7           | -1     | 524.593         | 8              | C[C@@H]1Cc2cc(ccc2O1)C(=O)C3=C(C(=O)N(C[C@@H]3c4ccc(cc4)OC5cccc5)C[C@@H]6CCCCO6)[O-]      |
| ZINC08441478 | 5.24  | -1.27             | -28.56           | 1        | 7           | 0      | 525.601         | 7              | C[C@@H]1Cc2cc(ccc2O1)C(=O)C3=C(C(=O)N(C[C@@H]3c4ccc(cc4)OC5cccc5)C[C@@H]6CCCCO6)O         |
| ZINC08441478 | 4.21  | -1.01             | -24.58           | 0        | 7           | 0      | 525.601         | 8              | C[C@@H]1Cc2cc(ccc2O1)C(=O)C[C@@H]3[C@@H](N(C(=O)C3=O)C[C@@H]4CCCCO4)c5ccc(cc5)OC6cccc6    |
| ZINC08441477 | 5.62  | 0.26              | -12.62           | 1        | 7           | 0      | 470.554         | 6              | CCOC(=O)C1=C(N=c2n(c1=O)/c=C/c3c[nH]nc3c4cccc4)/s2)C[C@@H]1c5cccc5C                       |
| ZINC0857640  | 5.55  | 2.41              | -21.71           | 1        | 5           | 0      | 466.581         | 4              | CC(=O)N1c2cccc2NC3=C(C[C@@H]1c4cccc4OC5cccc5)C(=O)CC(C3)C                                 |
| ZINC0857651  | 5.91  | 2.49              | -13              | 0        | 7           | 0      | 487.581         | 6              | CCOC(=O)C1=C(N=c2n(c1=O)/c=C/c3c[nH]nc3c4cccc4)/s2)C[C@@H]1c5cccc5OC                      |
| ZINC08441476 | 4.79  | 12.39             | -66.84           | 0        | 7           | -1     | 524.593         | 8              | C[C@@H]1Cc2cc(ccc2O1)C(=O)C3=C(C(=O)N(C[C@@H]3c4ccc(cc4)OC5cccc5)C[C@@H]6CCCCO6)[O-]      |
| ZINC08441476 | 5.24  | -1.83             | -32.2            | 1        | 7           | 0      | 525.601         | 7              | C[C@@H]1Cc2cc(ccc2O1)C(=O)C3=C(C(=O)N(C[C@@H]3c4ccc(cc4)OC5cccc5)C[C@@H]6CCCCO6)O         |
| ZINC08441476 | 4.21  | -1.54             | -25.54           | 0        | 7           | 0      | 525.601         | 8              | C[C@@H]1Cc2cc(ccc2O1)C(=O)C[C@@H]3[C@@H](N(C(=O)C3=O)C[C@@H]4CCCCO4)c5ccc(cc5)OC6cccc6    |
| ZINC08441475 | 6.54  | 0.08              | -14.45           | 1        | 6           | 0      | 519.626         | 4              | CC1ccc(cc1OC)C[C@@H]2C3=C(C4CCCC4C3)N=c5n2c(=O)/c=C/c6c[nH]c7c6cccc7)/s5                  |
| ZINC08441474 | 6.54  | -0.04             | -13.57           | 1        | 6           | 0      | 519.626         | 4              | CC1ccc(cc1OC)C[C@@H]2C3=C(C4CCCC4C3)N=c5n2c(=O)/c=C/c6c[nH]c7c6cccc7)/s5                  |
| ZINC02064097 | 6.42  | 2.54              | -12.56           | 0        | 6           | 0      | 458.51          | 6              | CCOC1cc(cc1OC)c2cccc3c2cccc3)C=C4(=O)OC5(CCCC5)OC4=O                                      |
| ZINC02064096 | 6.73  | 2.61              | -12.55           | 0        | 5           | 0      | 428.484         | 4              | c1ccc(cc1)COC2ccc3ccc3c2C=C4C(=O)OC5(CCCC5)OC4=O                                          |
| ZINC08441473 | 4.79  | 12.42             | -65.33           | 0        | 7           | -1     | 524.593         | 8              | C[C@@H]1Cc2cc(ccc2O1)C(=O)C3=C(C(=O)N(C[C@@H]3c4ccc(cc4)OC5cccc5)C[C@@H]6CCCCO6)[O-]      |
| ZINC08441473 | 5.24  | -1.83             | -31.99           | 1        | 7           | 0      | 525.601         | 7              | C[C@@H]1Cc2cc(ccc2O1)C(=O)C3=C(C(=O)N(C[C@@H]3c4ccc(cc4)OC5cccc5)C[C@@H]6CCCCO6)O         |
| ZINC08441473 | 4.21  | -1.53             | -25.49           | 0        | 7           | 0      | 525.601         | 8              | C[C@@H]1Cc2cc(ccc2O1)C(=O)C[C@@H]3[C@@H](N(C(=O)C3=O)C[C@@H]4CCCCO4)c5ccc(cc5)OC6cccc6    |
| ZINC0648858  | 3.11  | 12.88             | -36.26           | 2        | 6           | 1      | 461.283         | 4              | Cc1c2cccc2nH+1c1N(C[C@@H]3CC(=O)N(C3=O)c4cccc4                                            |
| ZINC0648858  | 3.11  | 12.88             | -36.35           | 2        | 6           | 1      | 461.283         | 4              | Cc1c2cccc2nH+1c1N(C[C@@H]3CC(=O)N(C3=O)c4cccc4                                            |
| ZINC0648858  | 3.11  | 12.47             | -18.35           | 1        | 6           | 0      | 460.275         | 4              | Cc1c2cccc2nH+1c1N(C[C@@H]3CC(=O)N(C3=O)c4cccc4                                            |
| ZINC0648858  | 3.11  | 12.47             | -17.87           | 1        | 6           | 0      | 460.275         | 4              | Cc1c2cccc2nH+1c1N(C[C@@H]3CC(=O)N(C3=O)c4cccc4                                            |
| ZINC02064095 | 5.51  | 3.16              | -11.58           | 0        | 6           | 0      | 426.44          | 5              | CC1ccc(cc1OC)c2cccc2F)C=C3(=O)OC4(CCCC4)OC3=O                                             |
| ZINC02064093 | 6.41  | 2.19              | -11.93           | 0        | 5           | 0      | 435.907         | 3              | c1ccc(cc1)Cn2cc(c3c2cccc3)C=C4(=O)OC5(CCCC5)OC4=O                                         |
| ZINC08441472 | 3.2   | 9.1               | -61.8            | 0        | 8           | -1     | 478.521         | 8              | CCOC1ccc(cc1)C[C@@H]2C(=C(C(=O)N2)C[C@@H]3CCCCO3)[O-]C(=O)c4ccc5c(c4)OCCO5                |
| ZINC08441472 | 3.64  | -1.94             | -26.54           | 1        | 8           | 0      | 479.529         | 7              | CCOC1ccc(cc1)C[C@@H]2C(=C(C(=O)N2)C[C@@H]3CCCCO3)[O-]C(=O)c4ccc5c(c4)OCCO5                |
| ZINC08441472 | 2.61  | -1.71             | -18.41           | 0        | 8           | 0      | 479.529         | 8              | CCOC1ccc(cc1)C[C@@H]2[C@@H](C(=O)C(=O)N2)C[C@@H]3CCCCO3)C(=O)c4ccc5c(c4)OCCO5             |
| ZINC0857521  | 5.58  | 3.82              | -17.86           | 0        | 7           | 0      | 430.84          | 4              | CCOC(=O)C1ccc(cc1)C2ccc(O2)C=C3C(=O)OC4(CCCC4)OC3=O                                       |
| ZINC0857497  | 6.01  | 2.28              | -18.12           | 0        | 6           | 0      | 457.574         | 10             | CC1ccc(c1N(COC)C(=O)Cn2c3cccc3nc2OC4cccc4)CC                                              |
| ZINC0857496  | 6.32  | 2.72              | -12.83           | 0        | 5           | 0      | 441.575         | 9              | CC1ccc(c1N(COC)C(=O)Cn2c3cccc3nc2OC4cccc4)CC                                              |
| ZINC08441471 | 3.2   | 9.06              | -64.16           | 0        | 8           | -1     | 478.521         | 8              | CCOC1ccc(cc1)C[C@@H]2C(=C(C(=O)N2)C[C@@H]3CCCCO3)[O-]C(=O)c4ccc5c(c4)OCCO5                |
| ZINC08441471 | 3.64  | -1.75             | -27.71           | 1        | 8           | 0      | 479.529         | 7              | CCOC1ccc(cc1)C[C@@H]2C(=C(C(=O)N2)C[C@@H]3CCCCO3)[O-]C(=O)c4ccc5c(c4)OCCO5                |
| ZINC08441471 | 2.61  | -1.48             | -24.13           | 0        | 8           | 0      | 479.529         | 8              | CCOC1ccc(cc1)C[C@@H]2[C@@H](C(=O)C(=O)N2)C[C@@H]3CCCCO3)C(=O)c4ccc5c(c4)OCCO5             |
| ZINC0857459  | 4.86  | -0.05             | -62.82           | 0        | 6           | -1     | 499.772         | 5              | Cc1ccc2cc(c(nc2c1)Cl)C3=NN(C[C@@H]3)C4ccc(cc4)Br)C(=O)CC(=O)O                             |
| ZINC0857460  | 4.86  | -0.05             | -62.83           | 0        | 6           | -1     | 499.772         | 5              | Cc1ccc2cc(c(nc2c1)Cl)C3=NN(C[C@@H]3)C4ccc(cc4)Br)C(=O)CC(=O)O                             |
| ZINC08441470 | 3.2   | 9.03              | -66.33           | 0        | 8           | -1     | 478.521         | 8              | CCOC1ccc(cc1)C[C@@H]2C(=C(C(=O)N2)C[C@@H]3CCCCO3)[O-]C(=O)c4ccc5c(c4)OCCO5                |
| ZINC08441470 | 3.64  | -1.72             | -28.05           | 1        | 8           | 0      | 479.529         | 7              | CCOC1ccc(cc1)C[C@@H]2C(=C(C(=O)N2)C[C@@H]3CCCCO3)[O-]C(=O)c4ccc5c(c4)OCCO5                |
| ZINC08441470 | 2.61  | -1.46             | -25.7            | 0        | 8           | 0      | 479.529         | 8              | CCOC1ccc(cc1)C[C@@H]2[C@@H](C(=O)C(=O)N2)C[C@@H]3CCCCO3)C(=O)c4ccc5c(c4)OCCO5             |
| ZINC08441469 | 5.83  | 1.26              | -11.06           | 0        | 6           | 0      | 485.939         | 7              | CC1=NC2=C(C[C@@H]1(C1C(=O)OC)C3ccc(c1c3)OC4c4cc(c(c4)O)F)OC)C(=O)CCC2                     |
| ZINC08441469 | 6.02  | 1.51              | -12.51           | 0        | 6           | 0      | 485.939         | 7              | COc1ccc(cc1)COC2ccc(c2)C)F)C[C@@H]3C4C(=NC(=C)C3C(=O)OC)CCC4=O                            |
| ZINC08441469 | 6.02  | 2.56              | -12.55           | 0        | 6           | 0      | 485.939         | 7              | COc1ccc(cc1)COC2ccc(c2)C)F)C[C@@H]3C4C(=NC(=C)C3C(=O)OC)CCC4=O                            |
| ZINC08441469 | 5.83  | 1.35              | -14.51           | 0        | 6           | 0      | 485.939         | 7              | CC1=C(C[C@@H]1(C[C@@H]2C(=N1)CCC2=O)c3ccc(c2c3)OC4c4cc(c(c4)O)F)OC)C(=O)OC                |
| ZINC08441468 | 6.57  | 1.81              | -18.38           | 1        | 6           | 0      | 531.637         | 8              | COc1ccc(cc1OC)c2cc(nc2C#N)S(=O)Nc3cccc4c3cccc4)c5cccc5                                    |
| ZINC08441467 | 3.2   | 8.58              | -67.7            | 0        | 8           | -1     | 478.521         | 8              | CCOC1ccc(cc1)C[C@@H]2C(=C(C(=O)N2)C[C@@H]3CCCCO3)[O-]C(=O)c4ccc5c(c4)OCCO5                |
| ZINC08441467 | 3.64  | -2.43             | -31.39           | 1        | 8           | 0      | 479.529         | 7              | CCOC1ccc(cc1)C[C@@H]2C(=C(C(=O)N2)C[C@@H]3CCCCO3)[O-]C(=O)c4ccc5c(c4)OCCO5                |
| ZINC08441467 | 2.61  | -2.2              | -25.21           | 0        | 8           | 0      | 479.529         | 8              | CCOC1ccc(cc1)C[C@@H]2[C@@H](C(=O)C(=O)N2)C[C@@H]3CCCCO3)C(=O)c4ccc5c(c4)OCCO5             |
| ZINC08441466 | 6.27  | -2.23             | -16.99           | 1        | 6           | 0      | 509.631         | 9              | CC1cccc1NC(=O)CS2c2c(ccn2)c3cccc3)4ccc(c1c4)OC1OC#N                                       |
| ZINC08441465 | 4.08  | 10.56             | -59.97           | 0        | 7           | -1     | 476.549         | 8              | CCOC1ccc(cc1)C[C@@H]2C(=C(C(=O)N2)C[C@@H]3CCCCO3)[O-]C(=O)c4ccc5c(c4)C[C@@H]5O5C          |
| ZINC08441465 | 4.52  | -1.89             | -30.48           | 1        | 7           | 0      | 477.557         | 7              | CCOC1ccc(cc1)C[C@@H]2C(=C(C(=O)N2)C[C@@H]3CCCCO3)[O-]C(=O)c4ccc5c(c4)C[C@@H]5O5C          |
| ZINC08441465 | 3.49  | -1.63             | -25.35           | 0        | 7           | 0      | 477.557         | 8              | CCOC1ccc(cc1)C[C@@H]2[C@@H](C(=O)C(=O)N2)C[C@@H]3CCCCO3)C(=O)c4ccc5c(c4)C[C@@H]5O5C       |
| ZINC08441464 | 3.72  | -2.05             | -15.46           | 2        | 9           | 0      | 474.564         | 10             | CCOC(=O)c1c(csc1NC(=O)CS2c2c(ccn2)c3ccc(cc3)OC)C(=O)C                                     |
| ZINC08441463 | 6.67  | -1.51             | -11.19           | 3        | 6           | 0      | 495.604         | 6              | Cc1ccc(c1)c2ccc(c3c(c3)OC)C(=O)Nc4cccc4OC)Nc5ccc(cc5)OC                                   |
| ZINC08441462 | 4.08  | 10.52             | -62.38           | 0        | 7           | -1     | 476.549         | 8              | CCOC1ccc(cc1)C[C@@H]2C(=C(C(=O)N2)C[C@@H]3CCCCO3)[O-]C(=O)c4ccc5c(c4)C[C@@H]5O5C          |
| ZINC08441462 | 4.52  | -1.38             | -27.19           | 1        | 7           | 0      | 477.557         | 7              | CCOC1ccc(cc1)C[C@@H]2C(=C(C(=O)N2)C[C@@H]3CCCCO3)[O-]C(=O)c4ccc5c(c4)C[C@@H]5O5C          |



**Supplementary Table S2:  
Detailed table of XP Docking using Schrodinger's Glide module**

| ZINC_ID      | sLogP | ApolarDesolvation | PolarDesolvation | H Donors | H Acceptors | Charge | MolecularWeight | RotatableBonds | SMILES                                                                       |
|--------------|-------|-------------------|------------------|----------|-------------|--------|-----------------|----------------|------------------------------------------------------------------------------|
| ZINC00865273 | 5.24  | 9.97              | -51.48           | 2        | 6           | 1      | 436.528         | 10             | CCOc1ccc(cc1)C[NH+](CCc2ccc3c(c2)OC03)C4ccc(cc4)OC                           |
| ZINC00865273 | 5.24  | 7.68              | -10.93           | 1        | 6           | 0      | 435.52          | 10             | CCOc1ccc(cc1)CN(Cc2ccc3c(c2)OC03)C4ccc(cc4)OC                                |
| ZINC08441436 | 6.06  | 13.31             | -56.03           | 1        | 5           | 1      | 499.425         | 10             | CCOc1ccc(cc1)C[NH+](CCc2ccc3c(c2)OC03)C4ccc(c(c4)Br)OC                       |
| ZINC08441436 | 6.06  | 11.18             | -10.15           | 0        | 5           | 0      | 498.417         | 10             | CCOc1ccc(cc1)CN(Cc2ccc3c(c2)OC03)C4ccc(c(c4)Br)OC                            |
| ZINC02753344 | 4.9   | 11.98             | -50.94           | 1        | 7           | 1      | 480.581         | 12             | CCOc1ccc(cc1)C[NH+](CCc2ccc3c(c2)OC03)C4ccc(c(c4)OC)OC                       |
| ZINC02753344 | 4.9   | 9.77              | -11.8            | 0        | 7           | 0      | 479.573         | 12             | CCOc1ccc(cc1)CN(Cc2ccc3c(c2)OC03)C4ccc(c(c4)OC)OC                            |
| ZINC00703051 | 1.02  | 6.9               | -64.16           | 0        | 8           | -1     | 421.429         | 5              | c1cc(cnc1)[C@H]2C=C(C(=O)N2)C[C@@H]3CCCC03[O-][C](=O)c4ccc5c(c4)OCCO5        |
| ZINC00703051 | 1.47  | -3.03             | -33.43           | 1        | 8           | 0      | 422.437         | 4              | c1cc(cnc1)[C@H]2C=C(C(=O)N2)C[C@@H]3CCCC03[O-][C](=O)c4ccc5c(c4)OCCO5        |
| ZINC00703051 | 0.44  | -2.81             | -26.21           | 0        | 8           | 0      | 422.437         | 5              | c1cc(cnc1)[C@H]2C=C(C(=O)N2)C[C@@H]3CCCC03[O-][C](=O)c4ccc5c(c4)OCCO5        |
| ZINC00703052 | 1.02  | 6.8               | -60.58           | 0        | 8           | -1     | 421.429         | 5              | c1cc(cnc1)[C@H]2C=C(C(=O)N2)C[C@@H]3CCCC03[O-][C](=O)c4ccc5c(c4)OCCO5        |
| ZINC00703052 | 1.47  | -3.05             | -28.2            | 1        | 8           | 0      | 422.437         | 4              | c1cc(cnc1)[C@H]2C=C(C(=O)N2)C[C@@H]3CCCC03[O-][C](=O)c4ccc5c(c4)OCCO5        |
| ZINC00703052 | 0.44  | -2.77             | -22.19           | 0        | 8           | 0      | 422.437         | 5              | c1cc(cnc1)[C@H]2C=C(C(=O)N2)C[C@@H]3CCCC03[O-][C](=O)c4ccc5c(c4)OCCO5        |
| ZINC08441435 | 1.89  | 7.11              | -63.14           | 0        | 10          | -1     | 510.519         | 8              | COC1cc(c(c1)OC)C[C@H]2C=C(C(=O)N2)C[C@@H]3CCCC03[O-][C](=O)c4ccc5c(c4)OCCO5  |
| ZINC08441435 | 2.34  | -1.63             | -33.45           | 1        | 10          | 0      | 511.527         | 7              | COC1cc(c(c1)OC)C[C@H]2C=C(C(=O)N2)C[C@@H]3CCCC03[O-][C](=O)c4ccc5c(c4)OCCO5  |
| ZINC08441435 | 1.31  | -1.4              | -29.32           | 0        | 10          | 0      | 511.527         | 8              | COC1cc(c(c1)OC)C[C@H]2C=C(C(=O)N2)C[C@@H]3CCCC03[O-][C](=O)c4ccc5c(c4)OCCO5  |
| ZINC08441434 | 7.13  | 0.61              | -10.26           | 0        | 6           | 0      | 574.899         | 7              | CC1=NC2=C([C@H]([C1(C=O)OC]c3ccc(c(c3)OC4ccc(cc4)Br)C)OC)C(=O)CC(2)[C]C      |
| ZINC08441434 | 7.13  | 0.55              | -13.34           | 0        | 6           | 0      | 574.899         | 7              | CC1=CC([C@H]([C@H]2C=C(N1)CC(C2=O)[C]C)c3ccc(c(c3)OC4ccc(cc4)Br)C)OC)C(=O)OC |
| ZINC08441434 | 7.32  | 1.99              | -12.05           | 0        | 6           | 0      | 574.899         | 7              | CC1(C2=NC=C(C)[C@H]([C1(C=O)OC]c3ccc(c(c3)OC4ccc(cc4)Br)C)OC)C(=O)OC         |
| ZINC08441434 | 7.32  | 0.67              | -10.76           | 0        | 6           | 0      | 574.899         | 7              | CC1(C2=NC=C(C)[C@H]([C1(C=O)OC]c3ccc(c(c3)OC4ccc(cc4)Br)C)OC)C(=O)OC         |
| ZINC08441430 | 5.15  | 3.38              | -15.82           | 1        | 6           | 0      | 448.885         | 4              | [H]/N=C1/[C@H]([C2=CCCC[C@H]2[C@@H]([C1(C#N)C#N]c3ccc(c(c3)OC4ccc(cc4)F)C#N  |
| ZINC08441430 | 5.15  | 3.2               | -40.16           | 2        | 6           | 1      | 449.893         | 4              | c1cc(c(c1F)C)OC2ccc(o2)[C@H]3[C@H]4CCCC=C4[C@H]([C3(C#N)C#N]C#N              |
| ZINC08441429 | 1.89  | 7.14              | -62.94           | 0        | 10          | -1     | 510.519         | 8              | COC1cc(c(c1)OC)C[C@H]2C=C(C(=O)N2)C[C@@H]3CCCC03[O-][C](=O)c4ccc5c(c4)OCCO5  |
| ZINC08441429 | 2.34  | -1.12             | -29.11           | 1        | 10          | 0      | 511.527         | 7              | COC1cc(c(c1)OC)C[C@H]2C=C(C(=O)N2)C[C@@H]3CCCC03[O-][C](=O)c4ccc5c(c4)OCCO5  |
| ZINC08441429 | 1.31  | -0.84             | -25.82           | 0        | 10          | 0      | 511.527         | 8              | COC1cc(c(c1)OC)C[C@H]2C=C(C(=O)N2)C[C@@H]3CCCC03[O-][C](=O)c4ccc5c(c4)OCCO5  |
| ZINC08441424 | 5.15  | 3.22              | -13.32           | 1        | 6           | 0      | 448.885         | 4              | [H]/N=C1/[C@H]([C2=CCCC[C@H]2[C@@H]([C1(C#N)C#N]c3ccc(c(c3)OC4ccc(cc4)F)C#N  |
| ZINC08441424 | 5.15  | 3.04              | -44.96           | 2        | 6           | 1      | 449.893         | 4              | c1cc(c(c1F)C)OC2ccc(o2)[C@H]3[C@H]4CCCC=C4[C@H]([C3(C#N)C#N]C#N              |
| ZINC08441423 | 1.89  | 7.03              | -67.84           | 0        | 10          | -1     | 510.519         | 8              | COC1cc(c(c1)OC)C[C@H]2C=C(C(=O)N2)C[C@@H]3CCCC03[O-][C](=O)c4ccc5c(c4)OCCO5  |
| ZINC08441423 | 2.34  | -1.14             | -28.82           | 1        | 10          | 0      | 511.527         | 7              | COC1cc(c(c1)OC)C[C@H]2C=C(C(=O)N2)C[C@@H]3CCCC03[O-][C](=O)c4ccc5c(c4)OCCO5  |
| ZINC08441423 | 1.31  | -0.88             | -26.88           | 0        | 10          | 0      | 511.527         | 8              | COC1cc(c(c1)OC)C[C@H]2C=C(C(=O)N2)C[C@@H]3CCCC03[O-][C](=O)c4ccc5c(c4)OCCO5  |
| ZINC08441421 | 5.15  | 3.4               | -12.96           | 1        | 6           | 0      | 448.885         | 4              | [H]/N=C1/[C@H]([C2=CCCC[C@H]2[C@@H]([C1(C#N)C#N]c3ccc(c(c3)OC4ccc(cc4)F)C#N  |
| ZINC08441421 | 5.15  | 3.23              | -41.55           | 2        | 6           | 1      | 449.893         | 4              | c1cc(c(c1F)C)OC2ccc(o2)[C@H]3[C@H]4CCCC=C4[C@H]([C3(C#N)C#N]C#N              |
| ZINC08441420 | 1.89  | 6.64              | -66.22           | 0        | 10          | -1     | 510.519         | 8              | COC1cc(c(c1)OC)C[C@H]2C=C(C(=O)N2)C[C@@H]3CCCC03[O-][C](=O)c4ccc5c(c4)OCCO5  |
| ZINC08441420 | 2.34  | -1.61             | -33.42           | 1        | 10          | 0      | 511.527         | 7              | COC1cc(c(c1)OC)C[C@H]2C=C(C(=O)N2)C[C@@H]3CCCC03[O-][C](=O)c4ccc5c(c4)OCCO5  |
| ZINC08441420 | 1.31  | -1.34             | -30.23           | 0        | 10          | 0      | 511.527         | 8              | COC1cc(c(c1)OC)C[C@H]2C=C(C(=O)N2)C[C@@H]3CCCC03[O-][C](=O)c4ccc5c(c4)OCCO5  |
| ZINC1580022  | 2.77  | 8.48              | -64.06           | 0        | 9           | -1     | 508.547         | 8              | [C@H]1C2cc(ccc2O1)C(=O)C3=C(C(=O)N[C@H]34ccc(c(c4)OC)OC)C[C@@H]5CCCCO5[O-]   |
| ZINC08441415 | 3.74  | 5.11              | -20              | 0        | 10          | 0      | 619.739         | 8              | CC1cc(c2c1)N(C)C=C2C4(C(=O)S3)C(=O)OC(C(=O)OC)C(C)C(=O)OC(C)C(=O)C           |
| ZINC08441414 | 5.89  | 1.06              | -11.14           | 0        | 6           | 0      | 461.558         | 8              | CCOC(=O)C1[C@H]([C2=C(CCCC2=O)N=C1C]c3ccc(c(c3)OC4ccc(cc4)OC                 |
| ZINC08441414 | 5.89  | 0.95              | -15.2            | 0        | 6           | 0      | 461.558         | 8              | CCOC(=O)C1=C(N=C2CCC(=O)C2)[C@H]1c3ccc(c(c3)OC4ccc(cc4)OC                    |
| ZINC08441414 | 6.07  | -0.13             | -11.7            | 0        | 6           | 0      | 461.558         | 8              | CCOC(=O)C1[C@H]([C2=C(NC1=O)CCC2=O]c3ccc(c(c3)OC4ccc(cc4)OC                  |
| ZINC08441413 | 2.77  | 8.55              | -61.76           | 0        | 9           | -1     | 508.547         | 8              | [C]C@H]1c2cc(ccc2O1)C(=O)C3=C(C(=O)N[C@H]34ccc(c(c4)OC)OC)C[C@@H]5CCCCO5[O-] |
| ZINC08441412 | 6.23  | 2.1               | -17.67           | 1        | 6           | 0      | 509.631         | 8              | [C]C1cc(c(c1)NC(=O)S2c2c(c(c2)3ccc3)c4ccc(c(c4)OC)C)C#N                      |
| ZINC08441411 | 7.35  | 3.4               | -16.71           | 0        | 6           | 0      | 557.675         | 9              | COC1cc(c(c1)OC)c2cc(nc2C#N)S(C)C(=O)N(c3ccc3)c4ccc4)c5ccc5                   |
| ZINC08441410 | 4.48  | -2.58             | -11.27           | 1        | 8           | 0      | 449.286         | 6              | C1cc(c(c1)C)2nc(c2)S(C)C(=O)Nc3ccc(c(c3)Br)N(=O)[O-]                         |
| ZINC1580023  | 2.77  | 8.37              | -63.63           | 0        | 9           | -1     | 508.547         | 8              | [C]C@H]1C2cc(ccc2O1)C(=O)C3=C(C(=O)N[C@H]34ccc(c(c4)OC)OC)C[C@@H]5CCCCO5[O-] |
| ZINC08441408 | 6.52  | 0                 | -8.4             | 2        | 4           | 0      | 422.937         | 5              | CC(C)OC(=O)c1c2c(c(c1)me2s1)c3ccc3)c4ccc(cc4)C1N                             |
| ZINC08441407 | 5.89  | 1.24              | -11.28           | 0        | 6           | 0      | 461.558         | 8              | CCOC(=O)C1[C@H]([C2=C(CCCC2=O)N=C1C]c3ccc(c(c3)OC4ccc(cc4)OC                 |
| ZINC08441407 | 5.89  | 0.98              | -14.8            | 0        | 6           | 0      | 461.558         | 8              | CCOC(=O)C1=C(N=C2CCC(=O)C2)[C@H]1c3ccc(c(c3)OC4ccc(cc4)OC                    |
| ZINC08441407 | 6.07  | 0.06              | -12.11           | 0        | 6           | 0      | 461.558         | 8              | CCOC(=O)C1[C@H]([C2=C(NC1=O)CCC2=O]c3ccc(c(c3)OC4ccc(cc4)OC                  |
| ZINC08441406 | 6.87  | 1.85              | -16.68           | 1        | 7           | 0      | 590.126         | 10             | CCOC(=O)c1c(c1)N(C)C(=O)S2c2c(c(c2)3ccc3)c4ccc(cc4)C1C#N(C(=O)C              |
| ZINC08441405 | 2.77  | 8.66              | -60.91           | 0        | 9           | -1     | 508.547         | 8              | [C]C@H]1c2cc(ccc2O1)C(=O)C3=C(C(=O)N[C@H]34ccc(c(c4)OC)OC)C[C@@H]5CCCCO5[O-] |
| ZINC08056396 | 4.15  | -3.71             | -10.71           | 1        | 6           | 0      | 415.689         | 5              | c1cc(cnc1)c2nnc(o2)S(C)C(=O)Nc3ccc(c(c3)C)C1                                 |
| ZINC08441404 | 7.85  | -0.13             | -7.89            | 2        | 3           | 0      | 454.982         | 4              | C1cc(c(c1)C)2cc(nc3c2c(c3)C(=O)c4ccc4)C1N)c5ccc5                             |
| ZINC08441403 | 2.48  | 7.52              | -60.53           | 1        | 8           | -1     | 464.494         | 6              | [C]C@H]1C2cc(ccc2O1)C(=O)C3=C(C(=O)N[C@H]34ccc(c(c4)OC)OC)C[C@@H]5CCCCO5[O-] |
| ZINC08441403 | 2.93  | -3.18             | -27.61           | 2        | 8           | 0      | 465.502         | 5              | [C]C@H]1C2cc(ccc2O1)C(=O)C3=C(C(=O)N[C@H]34ccc(c(c4)OC)OC)C[C@@H]5CCCCO5[O-] |
| ZINC08441403 | 1.9   | -2.91             | -21.74           | 1        | 8           | 0      | 465.502         | 6              | [C]C@H]1C2cc(ccc2O1)C(=O)C3=C(C(=O)N[C@H]34ccc(c(c4)OC)OC)C[C@@H]5CCCCO5[O-] |
| ZINC08441401 | 6.21  | 1.31              | -10.54           | 0        | 6           | 0      | 499.966         | 8              | CCOC(=O)C1[C@H]([C2=C(CCCC2=O)N=C1C]c3ccc(c(c3)OC4ccc(cc4)F)OC               |
| ZINC08441401 | 6.21  | 1.2               | -14.57           | 0        | 6           | 0      | 499.966         | 8              | CCOC(=O)C1=C(N=C2CCC(=O)C2)[C@H]1c3ccc(c(c3)OC4ccc(cc4)F)OC                  |
| ZINC08441401 | 6.39  | 0.12              | -11.34           | 0        | 6           | 0      | 499.966         | 8              | CCOC(=O)C1[C@H]([C2=C(NC1=O)CCC2=O]c3ccc(c(c3)OC4ccc(cc4)F)OC                |
| ZINC00617102 | 1.12  | 5.55              | -51.2            | 2        | 6           | -1     | 249.275         | 4              | c1cc(c(c1)c2nnc(n2)S(C)C(=O)O-                                               |
| ZINC08441400 | 2.48  | 6.53              | -63.44           | 1        | 8           | -1     | 464.494         | 6              | [C]C@H]1C2cc(ccc2O1)C(=O)C3=C(C(=O)N[C@H]34ccc(c(c4)OC)OC)C[C@@H]5CCCCO5[O-] |
| ZINC08441400 | 2.93  | -3.49             | -32.72           | 2        | 8           | 0      | 465.502         | 5              | [C]C@H]1C2cc(ccc2O1)C(=O)C3=C(C(=O)N[C@H]34ccc(c(c4)OC)OC)C[C@@H]5CCCCO5[O-] |



Supplementary Table S2:

Detailed table of XP Docking using Schrodinger's Glide module

| ZINC_ID      | xLogP | ApolarDesolvation | PolarDesolvation | H Donors | H Acceptors | Charge | MolecularWeight | RotatableBonds | SMILES                                                                      |
|--------------|-------|-------------------|------------------|----------|-------------|--------|-----------------|----------------|-----------------------------------------------------------------------------|
| ZINC00853651 | 4.95  | -4.4              | -9.92            | 1        | 5           | 0      | 469.158         | 5              | c1ccc(cc1c2nnc(o2)SCC(=O)Nc3ccc(cc3)Br)Br                                   |
| ZINC08441366 | 6.72  | 1.44              | -11.57           | 0        | 6           | 0      | 510.03          | 8              | CCOC(=O)C1[C@@H](C2=C(C(C(=O)O)C)N=C1C)c3ccc(c(c3)C)C4CCCC4C1OC             |
| ZINC08441366 | 6.72  | 1.36              | -15.03           | 0        | 6           | 0      | 510.03          | 8              | CCOC(=O)C1=C(N=C2CC(C(=O)C2)[C@H]1c3ccc(c(c3)C)C4CCCC4C1)OC(C)C             |
| ZINC08441366 | 6.91  | 0.26              | -11.7            | 0        | 6           | 0      | 510.03          | 8              | CCOC(=O)C1[C@@H](C2C(=NC1=C)CC(C(=O)O)C)c3ccc(c(c3)C)C4CCCC4C1OC            |
| ZINC08441365 | 4.47  | -0.7              | -49.09           | 2        | 8           | 1      | 539.608         | 9              | c1ccc(cc1)C0c2ccc(cc2)[C@H]3C=C(C(=O)N3CCNH+ 4CCOCC4)O(C)=O)c5cc6cccc6o5    |
| ZINC02064038 | 3.89  | -0.86             | -56.6            | 1        | 8           | 1      | 539.608         | 9              | c1ccc(cc1)C0c2ccc(cc2)[C@H]3C=C(C(=O)N3CCNH+ 4CCOCC4)O(C)=O)c5cc6cccc6o5    |
| ZINC08441364 | 6.36  | -1.63             | -8.25            | 0        | 4           | 0      | 443.682         | 5              | c1nc2c(c3c(s2)CCCC3)c(n1)SCC(=O)N(C4CCCC4)C5CCCC5                           |
| ZINC08441364 | 4.48  | -2.58             | -13.64           | 1        | 8           | 0      | 449.286         | 6              | Cc1ccc(cc1)NC(=O)CS2nnc(o2)c3ccc(cc3)Br N+ =O O-                            |
| ZINC08441363 | 4.7   | -1.02             | -12.21           | 1        | 7           | 0      | 428.539         | 5              | Cc1ccc(cc1)N+ =O O- ]NC(=O)[C@H](C)Sc2c3c4c(sc3nnc2)CCCC4                   |
| ZINC08441362 | 4.7   | -1.01             | -18.53           | 1        | 7           | 0      | 428.539         | 5              | Cc1ccc(cc1)N+ =O O- ]NC(=O)[C@H](C)Sc2c3c4c(sc3nnc2)CCCC4                   |
| ZINC08441361 | 4.47  | -0.69             | -48.94           | 2        | 8           | 1      | 539.608         | 9              | c1ccc(cc1)C0c2ccc(cc2)[C@H]3C=C(C(=O)N3CCNH+ 4CCOCC4)O(C)=O)c5cc6cccc6o5    |
| ZINC08441361 | 3.89  | -0.85             | -56.86           | 1        | 8           | 1      | 539.608         | 9              | c1ccc(cc1)C0c2ccc(cc2)[C@H]3C=C(C(=O)N3CCNH+ 4CCOCC4)O(C)=O)c5cc6cccc6o5    |
| ZINC00853635 | 4.9   | -4.17             | -8.32            | 1        | 5           | 0      | 469.158         | 5              | c1ccc(cc1)NC(=O)CS2nnc(o2)c3ccc(cc3)Br                                      |
| ZINC09070026 | 3.3   | -0.1              | -50.09           | 2        | 8           | 1      | 463.51          | 6              | C0c1cccc(c1)[C@H]2/C=C/C(=O)C3c4cccc4o3)/O/C(=O)C(=O)N2CC(NH+ 5CCOCC5       |
| ZINC08441359 | 6.72  | 1.62              | -11.84           | 0        | 6           | 0      | 510.03          | 8              | CCOC(=O)C1[C@@H](C2=C(C(C(=O)O)C)N=C1C)c3ccc(c(c3)C)C4CCCC4C1OC             |
| ZINC08441359 | 6.91  | 0.35              | -11.91           | 0        | 6           | 0      | 510.03          | 8              | CCOC(=O)C1[C@@H](C2=C(NC1=C)CC(C(=O)O)C)c3ccc(c(c3)C)C4CCCC4C1OC            |
| ZINC08441359 | 6.72  | 1.26              | -14.63           | 0        | 6           | 0      | 510.03          | 8              | CCOC(=O)C1=C(N=C2CC(C(=O)C2)[C@H]1c3ccc(c(c3)C)C4CCCC4C1)OC(C)C             |
| ZINC0853634  | 4.48  | -2.93             | -18.23           | 1        | 8           | 0      | 449.286         | 6              | Cc1ccc(cc1)N+ =O O- ]NC(=O)CS2nnc(o2)c3ccc(cc3)Br                           |
| ZINC09070021 | 3.3   | -0.1              | -50.66           | 2        | 8           | 1      | 463.51          | 6              | C0c1cccc(c1)[C@H]2/C=C/C(=O)C3c4cccc4o3)/O/C(=O)C(=O)N2CC(NH+ 5CCOCC5       |
| ZINC08441357 | 5.94  | -0.18             | -10.88           | 0        | 4           | 0      | 431.586         | 5              | c1ccc(cc1)N(c2cccc2)C(=O)CS3c4c5c(sc4nnc3)CCCC5                             |
| ZINC09274085 | 2.9   | 9.7               | -62.05           | 2        | 10          | 1      | 523.562         | 8              | C0c1ccc(cc1)C(=O)C[C@H]2/C=C/C(=O)C3c4cccc4o3)/O/C(=O)C(=O)N2CC(NH+ 5CCOCC5 |
| ZINC09274085 | 1.87  | 10.39             | -59.5            | 1        | 10          | 1      | 523.562         | 9              | C0c1ccc(cc1)C(=O)C[C@H]2/C=C/C(=O)C3c4cccc4o3)/O/C(=O)C(=O)N2CC(NH+ 5CCOCC5 |
| ZINC08441355 | 4.7   | -0.66             | -13.65           | 1        | 7           | 0      | 428.539         | 5              | Cc1ccc(cc1)NC(=O)[C@H](C)Sc2c3c4c(sc3nnc2)CCCC4 N+ =O O-                    |
| ZINC08441354 | 4.7   | -0.78             | -13.71           | 1        | 7           | 0      | 428.539         | 5              | Cc1ccc(cc1)NC(=O)[C@H](C)Sc2c3c4c(sc3nnc2)CCCC4 N+ =O O-                    |
| ZINC00853619 | 4.45  | -2.57             | -13.67           | 1        | 8           | 0      | 449.286         | 6              | Cc1ccc(cc1)Br)NC(=O)CS2nnc(o2)c3ccc(cc3)N+ =O O-                            |
| ZINC08441353 | 8.94  | 3.51              | -8.05            | 0        | 2           | 0      | 469.053         | 6              | CC(C)C1cccc(cc1)CSc2(c(c2n2)c3cccc3)c4ccc(cc4)C1C#N                         |
| ZINC08441352 | 6.49  | 1.93              | -10.4            | 0        | 6           | 0      | 513.993         | 7              | CC1=NC2=C([C@H](C1C(=O)O)C)c3ccc(c(c3)C)C4CCCC4C1OC                         |
| ZINC08441352 | 6.49  | 2.14              | -13.29           | 0        | 6           | 0      | 513.993         | 7              | CC1=C([C@H](C1C(=O)O)C)c3ccc(c(c3)C)C4CCCC4C1OC                             |
| ZINC08441352 | 6.67  | 3.23              | -10.92           | 0        | 6           | 0      | 513.993         | 7              | CC1(C(=O)N)C=C(C)C([C@H]2C(=O)C1)c3ccc(c(c3)C)C4CCCC4C1OC                   |
| ZINC08441352 | 6.67  | 2.02              | -11.24           | 0        | 6           | 0      | 513.993         | 7              | CC1(C(=O)N)C=C(C)C([C@H]2C(=O)C1)c3ccc(c(c3)C)C4CCCC4C1OC                   |
| ZINC09232515 | 2.9   | 9.66              | -59.52           | 2        | 10          | 1      | 523.562         | 8              | C0c1ccc(cc1)C(=O)C[C@H]2/C=C/C(=O)C3c4cccc4o3)/O/C(=O)C(=O)N2CC(NH+ 5CCOCC5 |
| ZINC09232515 | 1.87  | 10.37             | -58.7            | 1        | 10          | 1      | 523.562         | 9              | C0c1ccc(cc1)C(=O)C[C@H]2/C=C/C(=O)C3c4cccc4o3)/O/C(=O)C(=O)N2CC(NH+ 5CCOCC5 |
| ZINC06076996 | 6.24  | 3.28              | -10.92           | 0        | 4           | 0      | 422.937         | 7              | CC(C)OC(=O)CS1c1c(ccn1)c2cccc2)3ccc(cc3)C1C#N                               |
| ZINC08441350 | 2.84  | -0.3              | -57.74           | 2        | 9           | 1      | 507.563         | 9              | CC0c1ccc(cc1)OC[C@H]2C(=O)C(=O)N2CC(NH+ 3CCOCC3)O(C)=O)c4cc5cccc5o4         |
| ZINC08441350 | 2.26  | -0.39             | -67.78           | 1        | 9           | 1      | 507.563         | 9              | CC0c1ccc(cc1)OC[C@H]2C(=O)C(=O)N2CC(NH+ 3CCOCC3)O(C)=O)c4cc5cccc5o4         |
| ZINC08441349 | 5.98  | -1.16             | -14.96           | 2        | 6           | 0      | 513.022         | 7              | Cc1ccc(cc1)C(=O)N(C)C(=O)CS2c2(c(ccn2)c3cccc3)c4ccc(cc4)C1C#N               |
| ZINC08441348 | 8.08  | -0.6              | -7.77            | 2        | 3           | 0      | 475.4           | 4              | c1ccc(cc1)c2cc(c3c(sc3n2)C)C(=O)C4CCCC4C1Nc5ccc(cc5)C1                      |
| ZINC08441347 | 2.84  | -0.44             | -51.08           | 2        | 9           | 1      | 507.563         | 9              | CC0c1ccc(cc1)OC[C@H]2C(=O)C(=O)N2CC(NH+ 3CCOCC3)O(C)=O)c4cc5cccc5o4         |
| ZINC08441347 | 2.26  | -0.66             | -60.03           | 1        | 9           | 1      | 507.563         | 9              | CC0c1ccc(cc1)OC[C@H]2C(=O)C(=O)N2CC(NH+ 3CCOCC3)O(C)=O)c4cc5cccc5o4         |
| ZINC0853572  | 5.17  | -3.77             | -10.04           | 2        | 6           | 0      | 507.211         | 4              | Cc1ccc(cc1)NC(=O)CS2nnc(o2)c3ccc(cc3)Br)Br)nm2                              |
| ZINC08441346 | 6.33  | -1.92             | -11.62           | 3        | 7           | 0      | 511.603         | 7              | C0c1ccc(cc1)c2cc(nc3c2c(c3)C)C(=O)N4CCCC4C1OC                               |
| ZINC08441345 | 6.49  | 2.02              | -10.54           | 0        | 6           | 0      | 513.993         | 7              | CC1=NC2=C([C@H](C1C(=O)O)C)c3ccc(c(c3)C)C4CCCC4C1OC                         |
| ZINC08441345 | 6.67  | 3.39              | -12.19           | 0        | 6           | 0      | 513.993         | 7              | CC1(C(=O)N)C=C(C)C([C@H]2C(=O)C1)c3ccc(c(c3)C)C4CCCC4C1OC                   |
| ZINC08441345 | 6.49  | 1.95              | -13.53           | 0        | 6           | 0      | 513.993         | 7              | CC1=C([C@H](C1C(=O)O)C)c3ccc(c(c3)C)C4CCCC4C1OC                             |
| ZINC08441345 | 6.67  | 2.08              | -11.09           | 0        | 6           | 0      | 513.993         | 7              | CC1(C(=O)N)C=C(C)C([C@H]2C(=O)C1)c3ccc(c(c3)C)C4CCCC4C1OC                   |
| ZINC08441344 | 4.17  | 0.03              | -50.09           | 2        | 9           | 1      | 549.644         | 12             | CCCC0c1ccc(cc1)OC[C@H]2C(=O)C(=O)N2CC(NH+ 3CCOCC3)O(C)=O)c4cc5cccc5o4       |
| ZINC08441344 | 3.59  | -0.09             | -58.72           | 1        | 9           | 1      | 549.644         | 12             | CCCC0c1ccc(cc1)OC[C@H]2C(=O)C(=O)N2CC(NH+ 3CCOCC3)O(C)=O)c4cc5cccc5o4       |
| ZINC08441343 | 7.1   | -1.31             | -11.16           | 3        | 6           | 0      | 509.631         | 6              | Cc1ccc(cc1)NC(=O)e2c(c3c(cc3n2)c4ccc(cc4)OC)c5ccc(cc5)OC                    |
| ZINC08441342 | 6.39  | 1.93              | -17.95           | 1        | 8           | 0      | 587.723         | 11             | CCOC(=O)c1c(c1)C(=O)CS2c2(c(ccn2)c3ccc(cc3)OC)c4ccc(cc4)OC(C)C              |
| ZINC08441341 | 6.7   | 1.76              | -17.28           | 1        | 6           | 0      | 509.631         | 8              | Cc1ccc(cc1)NC(=O)CS2c2(c(ccn2)c3ccc(cc3)OC)c4ccc(cc4)OC(C)C                 |
| ZINC08441340 | 4.17  | 0.05              | -56.67           | 2        | 9           | 1      | 549.644         | 12             | CCCC0c1ccc(cc1)OC[C@H]2C(=O)C(=O)N2CC(NH+ 3CCOCC3)O(C)=O)c4cc5cccc5o4       |
| ZINC08441340 | 3.59  | -0.06             | -66.08           | 1        | 9           | 1      | 549.644         | 12             | CCCC0c1ccc(cc1)OC[C@H]2C(=O)C(=O)N2CC(NH+ 3CCOCC3)O(C)=O)c4cc5cccc5o4       |
| ZINC08441339 | 7.14  | -1.16             | -11.84           | 3        | 6           | 0      | 509.631         | 7              | Cc1cccc1NC(=O)e2c(c3c(cc3n2)c4ccc(cc4)OC)c5ccc(cc5)OC                       |
| ZINC08441338 | 7.12  | 0.5               | -11.09           | 3        | 6           | 0      | 549.574         | 7              | C0c1ccc(cc1)c2cc(nc3c2c(c3)C)C(=O)N4CCCC4C1OC                               |
| ZINC08441337 | 6.74  | 1.93              | -16.5            | 1        | 6           | 0      | 509.631         | 9              | Cc1cccc1NC(=O)CS2c2(c(ccn2)c3ccc(cc3)OC)c4ccc(cc4)OC(C)C                    |
| ZINC08441336 | 6.66  | 3.55              | -13.85           | 1        | 5           | 0      | 519.548         | 8              | C0c1ccc(cc1)c2cc(c1n2)SCC(=O)Nc3cccc3(C)F)F)C#N)c4cccc4                     |
| ZINC08441335 | 6.86  | 2.11              | -9.95            | 0        | 6           | 0      | 528.02          | 8              | CCOC(=O)C1[C@@H](C2=C(C(C(=O)O)C)N=C1C)c3ccc(c(c3)C)C4CCCC4C1OC             |
| ZINC08441335 | 7.05  | 0.93              | -10.5            | 0        | 6           | 0      | 528.02          | 8              | CCOC(=O)C1[C@@H](C2C(=NC1=C)CC(C(=O)O)C)c3ccc(c(c3)C)C4CCCC4C1OC            |
| ZINC08441335 | 6.86  | 2.03              | -13.49           | 0        | 6           | 0      | 528.02          | 8              | CCOC(=O)C1=C(N=C2CC(C(=O)C2)[C@H]1c3ccc(c(c3)C)C4CCCC4C1)OC(C)C             |
| ZINC08441334 | 4.74  | -0.33             | -51.42           | 2        | 8           | 1      | 553.635         | 10             | c1ccc(cc1)C0c2ccc(cc2)[C@H]3C=C(C(=O)N3CCNH+ 4CCOCC4)O(C)=O)c5cc6cccc6o5    |
| ZINC08441334 | 4.16  | -0.49             | -59.11           | 1        | 8           | 1      | 553.635         | 10             | c1ccc(cc1)C0c2ccc(cc2)[C@H]3C=C(C(=O)N3CCNH+ 4CCOCC4)O(C)=O)c5cc6cccc6o5    |

Supplementary Table S2:

Detailed table of XP Docking using Schrodinger's Glide module

| ZINC_ID      | sLogP | ApolarDesolvation | PolarDesolvation | H Donors | H Acceptors | Charge | MolecularWeight | RotatableBonds | SMILES                                                                          |
|--------------|-------|-------------------|------------------|----------|-------------|--------|-----------------|----------------|---------------------------------------------------------------------------------|
| ZINC08441333 | 7.04  | -1.25             | -11.15           | 3        | 5           | 0      | 479.605         | 5              | Cc1cc(ccc1)NC(=O)c2c(c3c(ccc3)2)c4ccc(cc4)OC)c5ccccc5N)C                        |
| ZINC08441332 | 7.1   | -1.28             | -11.17           | 3        | 6           | 0      | 509.631         | 6              | Cc1cc(ccc1)NC(=O)c2c(c3c(ccc3)2)c4ccc(cc4)OC)c5ccccc5O)N)C                      |
| ZINC08441331 | 3.79  | -0.23             | -48.03           | 2        | 8           | 1      | 503.575         | 10             | C=CCOC1ccc(cc1)[C@@H]2C(=C(C(=O)N2CC(C)NH+3CCOCC3)O)C(=O)c4cc5ccccc5o4          |
| ZINC08441331 | 3.21  | -0.41             | -55.4            | 1        | 8           | 1      | 503.575         | 10             | C=CCOC1ccc(cc1)[C@@H]2[C@@H](C(=O)C(=O)N2CC(C)NH+3CCOCC3)C(=O)c4cc5ccccc5o4     |
| ZINC08441330 | 8.31  | 3.69              | -9.53            | 0        | 3           | 0      | 464.634         | 7              | CC(C)(C)c1ccc(cc1)CSc2c(c(ccn2)c3ccc(cc3)OC)c4ccc4)C#N                          |
| ZINC08441329 | 6.28  | 2.1               | -17.47           | 1        | 6           | 0      | 509.631         | 8              | Cc1ccc(cc1)c2ccc(c(n2)SCC(=O)Nc3ccc(cc3)C)C#N)c4ccc(c(c4)OC)OC                  |
| ZINC08441328 | 7.11  | 3.86              | -13.01           | 1        | 5           | 0      | 533.575         | 8              | Cc1ccc(cc1)c2ccc(c(n2)SCC(=O)Nc3ccc(cc3)C(F)(F)F)C#N)c4ccc(cc4)OC               |
| ZINC08441327 | 6.86  | 2.29              | -10.3            | 0        | 6           | 0      | 528.02          | 8              | CCOC(=O)C1[C@@H](C2=C(C(C(C2=O)(C)C)N=C1C)c3ccc(c(c3)C)O)c4ccc(c(c4)C)F)OC      |
| ZINC08441327 | 7.05  | 1.01              | -10.8            | 0        | 6           | 0      | 528.02          | 8              | CCOC(=O)C1[C@@H](C2=C(NC1=O)C(C(C2=O)(C)C)c3ccc(c(c3)C)O)c4ccc(c(c4)C)F)OC      |
| ZINC08441327 | 6.86  | 1.93              | -13.09           | 0        | 6           | 0      | 528.02          | 8              | CCOC(=O)C1=C(N=C2CC(C(C(=O)C2)C@@H)1c3ccc(c(c3)C)O)c4ccc(c(c4)C)F)OC)C)C        |
| ZINC08441326 | 3.79  | -0.24             | -47.14           | 2        | 8           | 1      | 503.575         | 10             | C=CCOC1ccc(cc1)[C@@H]2C(=C(C(=O)N2CC(C)NH+3CCOCC3)O)C(=O)c4cc5ccccc5o4          |
| ZINC08441326 | 3.21  | -0.42             | -54.31           | 1        | 8           | 1      | 503.575         | 10             | C=CCOC1ccc(cc1)[C@@H]2[C@@H](C(=O)C(=O)N2CC(C)NH+3CCOCC3)C(=O)c4cc5ccccc5o4     |
| ZINC08441325 | 7.06  | 2.86              | -9.12            | 0        | 3           | 0      | 422.553         | 6              | Cc1ccc(cc1)c2ccc(c(n2)SC3CCCC3)C#N)c4ccc(cc4)OC                                 |
| ZINC08441323 | 7.51  | 0.8               | -10.38           | 3        | 5           | 0      | 533.575         | 6              | Cc1ccc(cc1)c2ccc(c3c(c(cc3n2)C(=O)Nc4ccc4C(F)(F)F)N)c5ccc(cc5)OC                |
| ZINC08441322 | 4.58  | -0.48             | -47.54           | 2        | 8           | 1      | 519.618         | 11             | CCCCOC1ccc(cc1)[C@@H]2C(=C(C(=O)N2CC(C)NH+3CCOCC3)O)C(=O)c4cc5ccccc5o4          |
| ZINC08441322 | 4.4   | -0.66             | -54.91           | 1        | 8           | 1      | 519.618         | 11             | CCCCOC1ccc(cc1)[C@@H]2[C@@H](C(=O)C(=O)N2CC(C)NH+3CCOCC3)C(=O)c4cc5ccccc5o4     |
| ZINC08441321 | 7.77  | 2.12              | -15.25           | 1        | 4           | 0      | 499.639         | 6              | Cc1ccc(cc1)c2ccc(c(n2)SCC(=O)Nc3ccc(cc3)C)C#N)c5ccccc5                          |
| ZINC08441320 | 5.92  | 0.66              | -10.7            | 0        | 6           | 0      | 514.416         | 7              | CCOC(=O)C1[C@@H](C2=C(C(C(C2=O)(C)C)N=C1C)c3ccc(c(c3)C)O)c4ccc(c(c4)Br          |
| ZINC08441320 | 6.1   | -0.15             | -10.58           | 0        | 6           | 0      | 514.416         | 7              | CCOC(=O)C1[C@@H](C2=C(NC1=O)C(C(C2=O)(C)C)c3ccc(c(c3)C)O)c4ccc(c(c4)Br          |
| ZINC08441320 | 5.92  | 0.87              | -13.26           | 0        | 6           | 0      | 514.416         | 7              | CCOC(=O)C1=C(N=C2CC(C(C(=O)C2)C@@H)1c3ccc(cc3)C)O)c4ccc(c(c4)Br)C)C             |
| ZINC08441319 | 4.58  | -0.49             | -47.11           | 2        | 8           | 1      | 519.618         | 11             | CCCCOC1ccc(cc1)[C@@H]2C(=C(C(=O)N2CC(C)NH+3CCOCC3)O)C(=O)c4cc5ccccc5o4          |
| ZINC08441319 | 4     | -0.67             | -54.33           | 1        | 8           | 1      | 519.618         | 11             | CCCCOC1ccc(cc1)[C@@H]2[C@@H](C(=O)C(=O)N2CC(C)NH+3CCOCC3)C(=O)c4cc5ccccc5o4     |
| ZINC08441318 | 6.26  | -1.12             | -13.14           | 3        | 7           | 0      | 525.63          | 7              | Cc1ccc(cc1)c2ccc(c3c(c(cc3n2)C(=O)Nc4ccc4OC)N)c5ccc(c5)OC)OC                    |
| ZINC08441317 | 8.17  | -1.16             | -10.38           | 3        | 4           | 0      | 499.639         | 4              | Cc1ccc(cc1)c2ccc(c3c(c(cc3n2)C(=O)Nc4ccc4C)C)N)c5ccc(cc5)OC                     |
| ZINC08441316 | 1.85  | -1.77             | -45.62           | 2        | 8           | 1      | 448.499         | 7              | C1ccc2c(c1)cc(o2)C(=O)C3=C(C(=O)N(C@@H)3C4CCN4)CC(NH+3CCOCC5)O                  |
| ZINC08441316 | 1.27  | -1.94             | -53.04           | 1        | 8           | 1      | 448.499         | 7              | C1ccc2c(c1)cc(o2)C(=O)C3=C(C(=O)N(C@@H)3[C@@H](N(C(=O)C3=O)CC(NH+4CCOCC4)C)ccc5 |
| ZINC08441315 | 7.03  | 2.06              | -15              | 1        | 4           | 0      | 463.606         | 6              | Cc1ccc(cc1)c2ccc(c(n2)SCC(=O)Nc3ccc(cc3)C)C#N)c4ccc4                            |
| ZINC08053507 | 6.25  | 1.57              | -17.19           | 1        | 6           | 0      | 495.604         | 8              | Cc1ccc(cc1)c2ccc(c(n2)SCC(=O)Nc3ccc(cc3)OC)C#N)c4ccc4                           |
| ZINC08441314 | 6.11  | 1.9               | -21.23           | 1        | 5           | 0      | 477.589         | 7              | Cc1ccc(cc1)c2ccc(c(n2)SCC(=O)Nc3ccc(cc3)C)C#N)c4ccc4                            |
| ZINC08441313 | 5.92  | 0.81              | -10.74           | 0        | 6           | 0      | 514.416         | 7              | CCOC(=O)C1[C@@H](C2=C(C(C(C2=O)(C)C)N=C1C)c3ccc(c(c3)C)O)c4ccc(c(c4)Br          |
| ZINC08441313 | 6.1   | -0.48             | -13.3            | 0        | 6           | 0      | 514.416         | 7              | CCOC(=O)C1[C@@H](C2=C(NC1=O)C(C(C2=O)(C)C)c3ccc(c(c3)C)O)c4ccc(c(c4)Br          |
| ZINC08441313 | 5.92  | 0.54              | -15.77           | 0        | 6           | 0      | 514.416         | 7              | CCOC(=O)C1=C(N=C2CC(C(C(=O)C2)C@@H)1c3ccc(cc3)C)O)c4ccc(c(c4)Br)C)C             |
| ZINC08441312 | 3.11  | -0.2              | -56.77           | 2        | 9           | 1      | 521.59          | 10             | CCOC1ccc(cc1OC)[C@@H]2C(=C(C(=O)N2CC(C)NH+3CCOCC3)O)C(=O)c4cc5ccccc5o4          |
| ZINC08441312 | 2.53  | -0.29             | -66.02           | 1        | 9           | 1      | 521.59          | 10             | CCOC1ccc(cc1OC)[C@@H]2[C@@H](C(=O)C(=O)N2CC(C)NH+3CCOCC3)C(=O)c4cc5ccccc5o4     |
| ZINC08053504 | 4.76  | -3.11             | -12.79           | 1        | 6           | 0      | 454.733         | 6              | COC1ccc(cc1NC(=O)CSc2nnc(o2)c3ccc3Br)Cl                                         |
| ZINC08441311 | 4     | -2.2              | -14.11           | 1        | 8           | 0      | 435.259         | 6              | C1ccc(c(c1)c2nnc(o2)SCC(=O)Nc3ccc(cc3)N(=O)O)Br                                 |
| ZINC08441310 | 3.11  | -0.15             | -56.73           | 2        | 9           | 1      | 521.59          | 10             | CCOC1ccc(cc1OC)[C@@H]2C(=C(C(=O)N2CC(C)NH+3CCOCC3)O)C(=O)c4cc5ccccc5o4          |
| ZINC08441310 | 2.53  | -0.25             | -66.08           | 1        | 9           | 1      | 521.59          | 10             | CCOC1ccc(cc1OC)[C@@H]2[C@@H](C(=O)C(=O)N2CC(C)NH+3CCOCC3)C(=O)c4cc5ccccc5o4     |
| ZINC08441309 | 7.08  | 2.19              | -14.33           | 1        | 4           | 0      | 463.606         | 7              | CC1ccc(c1NC(=O)CSc2c(c(ccn2)c3ccc(cc3)C)C)C#N                                   |
| ZINC08441308 | 6.86  | 0.09              | -10.84           | 0        | 6           | 0      | 560.872         | 8              | CCOC(=O)C1[C@@H](C2=C(C(C(C2=O)(C)C)N=C1C)c3ccc(c(c3)C)O)c4ccc(cc4Br)C)OC       |
| ZINC08441308 | 7.04  | -1.02             | -12.19           | 0        | 6           | 0      | 560.872         | 8              | CCOC(=O)C1[C@@H](C2=C(NC1=O)C(C(C2=O)(C)C)c3ccc(c(c3)C)O)c4ccc(cc4Br)C)OC       |
| ZINC08441308 | 6.86  | -0.1              | -14.21           | 0        | 6           | 0      | 560.872         | 8              | CCOC(=O)C1=C(N=C2CC(C(C(=O)C2)C@@H)1c3ccc(cc3)C)O)c4ccc(cc4Br)C)OC              |
| ZINC08441307 | 7.06  | 3.84              | -12.29           | 1        | 4           | 0      | 503.549         | 7              | Cc1ccc(cc1)c2ccc(c(n2)SCC(=O)Nc3ccc(cc3)C(F)(F)F)C#N)c4ccc4                     |
| ZINC08053499 | 4.96  | -2.33             | -11.88           | 1        | 5           | 0      | 418.316         | 6              | Cc1cccc1NC(=O)CSc2nnc(o2)c3ccc3Br                                               |
| ZINC0702997  | 4.84  | 1.89              | -16.25           | 1        | 8           | 0      | 535.552         | 9              | COc1ccc(cc1OC2CCCC2)[C@@H]3C(=C(C(=O)N3Cc4ccc4)O)C(=O)c5cc6cccc6o5              |
| ZINC0702997  | 4.26  | 1.67              | -21.45           | 0        | 8           | 0      | 535.552         | 9              | COc1ccc(cc1OC2CCCC2)[C@@H]3[C@@H](C(=O)C(=O)N3Cc4ccc4)C(=O)c5cc6cccc6o5         |
| ZINC08441306 | 6.7   | 4.19              | -14.88           | 1        | 6           | 0      | 563.601         | 9              | Cc1ccc(cc1)c2ccc(c(n2)SCC(=O)Nc3ccc(cc3)C(F)(F)F)C#N)c4ccc(c(c4)OC)OC           |
| ZINC0702998  | 4.84  | 1.78              | -16.47           | 1        | 8           | 0      | 535.552         | 9              | COc1ccc(cc1OC2CCCC2)[C@@H]3C(=C(C(=O)N3Cc4ccc4)O)C(=O)c5cc6cccc6o5              |
| ZINC0702998  | 4.26  | 1.57              | -23.2            | 0        | 8           | 0      | 535.552         | 9              | COc1ccc(cc1OC2CCCC2)[C@@H]3[C@@H](C(=O)C(=O)N3Cc4ccc4)C(=O)c5cc6cccc6o5         |
| ZINC06245730 | 8.45  | 18.71             | -11.9            | 0        | 4           | 0      | 523.746         | 7              | Cc1ccc(cc1)c2ccc(c(n2)SCC(=O)N(C3CCCC3)C4CCCC4)C#N)c5ccccc5                     |
| ZINC08441305 | 6.86  | 0.1               | -10.81           | 0        | 6           | 0      | 560.872         | 8              | CCOC(=O)C1[C@@H](C2=C(C(C(C2=O)(C)C)N=C1C)c3ccc(c(c3)C)O)c4ccc(cc4Br)C)OC       |
| ZINC08441305 | 7.04  | -1.01             | -12.3            | 0        | 6           | 0      | 560.872         | 8              | CCOC(=O)C1[C@@H](C2=C(NC1=O)C(C(C2=O)(C)C)c3ccc(c(c3)C)O)c4ccc(cc4Br)C)OC       |
| ZINC08441305 | 6.86  | -0.09             | -14.31           | 0        | 6           | 0      | 560.872         | 8              | CCOC(=O)C1=C(N=C2CC(C(C(=O)C2)C@@H)1c3ccc(cc3)C)O)c4ccc(cc4Br)C)OC              |
| ZINC0702989  | 5.33  | 1.59              | -14.46           | 1        | 7           | 0      | 491.499         | 7              | C1ccc(cc1)OC2CCCC2)[C@@H]3C(=C(C(=O)N3Cc4ccc4)O)C(=O)c5cc6cccc6o5               |
| ZINC0702989  | 4.74  | 1.44              | -18.74           | 0        | 7           | 0      | 491.499         | 7              | C1ccc(cc1)OC2CCCC2)[C@@H]3[C@@H](C(=O)C(=O)N3Cc4ccc4)C(=O)c5cc6cccc6o5          |
| ZINC08441304 | 7.37  | 1.78              | -15.7            | 1        | 4           | 0      | 485.612         | 6              | Cc1ccc(cc1)c2ccc(c(n2)SCC(=O)Nc3ccc(cc3)C)C#N)c5ccccc5                          |
| ZINC0702990  | 5.33  | 2.11              | -14.93           | 1        | 7           | 0      | 491.499         | 7              | C1ccc(cc1)OC2CCCC2)[C@@H]3C(=C(C(=O)N3Cc4ccc4)O)C(=O)c5cc6cccc6o5               |
| ZINC0702990  | 4.74  | 1.9               | -19.32           | 0        | 7           | 0      | 491.499         | 7              | C1ccc(cc1)OC2CCCC2)[C@@H]3[C@@H](C(=O)C(=O)N3Cc4ccc4)C(=O)c5cc6cccc6o5          |
| ZINC0702987  | 5.3   | 2.11              | -13.5            | 1        | 6           | 0      | 455.51          | 6              | CC(C)(C)ccc(cc1)[C@@H]2C(=C(C(=O)N2Cc3ccc3)O)C(=O)c4cc5ccccc5o4                 |
| ZINC0702987  | 4.72  | 1.98              | -19.98           | 0        | 6           | 0      | 455.51          | 6              | CC(C)(C)ccc(cc1)[C@@H]2[C@@H](C(=O)C(=O)N2Cc3ccc3)C(=O)c4cc5ccccc5o4            |
| ZINC08441303 | 6.54  | 2.04              | -10.73           | 0        | 6           | 0      | 489.612         | 8              | CCOC(=O)C1[C@@H](C2=C(C(C(C2=O)(C)C)N=C1C)c3ccc(c(c3)C)O)c4ccc(cc4)C)OC         |





**Supplementary Table S2:**  
**Detailed table of XP Docking using Schrodinger's Glide module**

| ZINC_ID      | xLogP | ApolarDesolvation | PolarDesolvation | H Donors | H Acceptors | Charge | MolecularWeight | RotatableBonds | SMILES                                                                     |
|--------------|-------|-------------------|------------------|----------|-------------|--------|-----------------|----------------|----------------------------------------------------------------------------|
| ZINC08441287 | 4.48  | 1.66              | -21.4            | 1        | 9           | 0      | 543.62          | 13             | CCCCCoc1ccc(cc1OC)[C@H]2C=C(C(=O)N2CCN3cnc3)O[C@H]4c4ccc5cccc5o4           |
| ZINC08441287 | 3.9   | 1.55              | -28.18           | 0        | 9           | 0      | 543.62          | 13             | CCCCCoc1ccc(cc1OC)[C@H]2[C@@H](C(=O)C(=O)N2CCN3cnc3)C(=O)c4ccc5cccc5o4     |
| ZINC08441287 | 4.93  | 2.21              | -73.25           | 2        | 9           | 1      | 544.628         | 12             | CCCCCoc1ccc(cc1OC)[C@H]2[C@H](C(=O)N2CCN3cnc3)O[C@H]4c4ccc5cccc5o4         |
| ZINC08441287 | 3.9   | 1.83              | -62.5            | 1        | 9           | 1      | 544.628         | 13             | CCCCCoc1ccc(cc1OC)[C@H]2[C@@H](C(=O)C(=O)N2CCN3cnc3)O[C@H]4c4ccc5cccc5o4   |
| ZINC08441285 | 5.54  | 0.58              | -10.34           | 0        | 6           | 0      | 500.389         | 6              | CC1=NC2=C([C@H](C1C(=O)OC)c3ccc(o3)C)OC4c4ccc(c4)Br[C@H]C(=O)CC(C2)(C)C    |
| ZINC08441285 | 5.72  | 0.56              | -11.17           | 0        | 6           | 0      | 500.389         | 6              | CC1(C2=NC(=C)C([C@@H](C2C(=O)C1)c3ccc(o3)C)OC4c4ccc(c4)Br)C(=O)OC          |
| ZINC08441285 | 5.72  | 1.81              | -10.77           | 0        | 6           | 0      | 500.389         | 6              | CC1(C2=NC(=C)C([C@@H](C2C(=O)C1)c3ccc(o3)C)OC4c4ccc(c4)Br)C(=O)OC          |
| ZINC08441285 | 5.54  | 0.62              | -12.59           | 0        | 6           | 0      | 500.389         | 6              | CC1=C([C@H](C(=O)N1)CC(C2=O)(C)C)c3ccc(o3)C)OC4c4ccc(c4)Br)C(=O)OC         |
| ZINC08441284 | 7.05  | 2.25              | -9.08            | 0        | 6           | 0      | 492.399         | 8              | CC1=NC(=C([C@H](C1C(=O)OC)C)c2ccc(o2)c3ccc(cc3C)C)C(=O)OC(C)C              |
| ZINC08441284 | 7.24  | 2.28              | -9.36            | 0        | 6           | 0      | 492.399         | 8              | CC1=NC(=C([C@H](C1C(=O)OC)C)c2ccc(o2)c3ccc(cc3C)C)C(=O)OC(C)C              |
| ZINC08441284 | 7.24  | 3.7               | -16.14           | 0        | 6           | 0      | 492.399         | 8              | CC1=NC(=C([C@H](C1C(=O)OC)C)c2ccc(o2)c3ccc(cc3C)C)C(=O)OC(C)C              |
| ZINC08441284 | 7.05  | 2.32              | -10.18           | 0        | 6           | 0      | 492.399         | 8              | CC1=NC(=C([C@H](C1C(=O)OC)C)c2ccc(o2)c3ccc(cc3C)C)C(=O)OC(C)C              |
| ZINC08441283 | 4.48  | 1.64              | -22.32           | 1        | 9           | 0      | 543.62          | 13             | CCCCCoc1ccc(cc1OC)[C@H]2C=C(C(=O)N2CCN3cnc3)O[C@H]4c4ccc5cccc5o4           |
| ZINC08441283 | 3.9   | 1.42              | -30.29           | 0        | 9           | 0      | 543.62          | 13             | CCCCCoc1ccc(cc1OC)[C@H]2[C@@H](C(=O)C(=O)N2CCN3cnc3)C(=O)c4ccc5cccc5o4     |
| ZINC08441283 | 4.93  | 2.2               | -61.97           | 2        | 9           | 1      | 544.628         | 12             | CCCCCoc1ccc(cc1OC)[C@H]2[C@H](C(=O)N2CCN3cnc3)O[C@H]4c4ccc5cccc5o4         |
| ZINC08441283 | 3.9   | 1.71              | -53.96           | 1        | 9           | 1      | 544.628         | 13             | CCCCCoc1ccc(cc1OC)[C@H]2[C@@H](C(=O)C(=O)N2CCN3cnc3)C(=O)c4ccc5cccc5o4     |
| ZINC08441282 | 4.66  | 0.13              | -20.71           | 2        | 7           | 0      | 506.606         | 8              | CC1ccc(cc1)C(=O)N/C=C/C2cnc(nc2c3ccc3)c4ccc4)/C(=O)NC[C@H]5CCCCO5          |
| ZINC08897840 | 2.9   | 12.11             | -63.9            | 0        | 7           | -1     | 426.452         | 7              | c1ccc(cc1)[C@H]2C=C(C(=O)N2CCN3cnc3)O[C@H]4c4ccc5cccc5o4                   |
| ZINC08897840 | 2.31  | 13.89             | -45.42           | 1        | 7           | 1      | 428.468         | 7              | c1ccc(cc1)[C@H]2[C@H](C(=O)C(=O)N2CCN3cnc3)O[C@H]4c4ccc5cccc5o4            |
| ZINC08897840 | 3.34  | 12.73             | -47.11           | 2        | 7           | 1      | 428.468         | 6              | c1ccc(cc1)[C@H]2C=C(C(=O)N2CCN3cnc3)O[C@H]4c4ccc5cccc5o4                   |
| ZINC08897840 | 2.31  | 13.37             | -19.04           | 0        | 7           | 0      | 427.46          | 7              | c1ccc(cc1)[C@H]2[C@H](C(=O)C(=O)N2CCN3cnc3)C(=O)c4ccc5cccc5o4              |
| ZINC08897840 | 3.34  | 12.21             | -21.77           | 1        | 7           | 0      | 427.46          | 6              | c1ccc(cc1)[C@H]2C=C(C(=O)N2CCN3cnc3)O[C@H]4c4ccc5cccc5o4                   |
| ZINC08897840 | 2.9   | 12.59             | -75.65           | 1        | 7           | 0      | 427.46          | 7              | c1ccc(cc1)[C@H]2C=C(C(=O)N2CCN3cnc3)O[C@H]4c4ccc5cccc5o4                   |
| ZINC08441281 | 4.66  | -0.19             | -17.23           | 2        | 7           | 0      | 506.606         | 8              | CC1ccc(cc1)C(=O)N/C=C/C2cnc(nc2c3ccc3)c4ccc4)/C(=O)NC[C@H]5CCCCO5          |
| ZINC02063926 | 8.42  | 2.37              | -10.21           | 0        | 7           | 0      | 543.689         | 10             | CCCCCN1c2ccc2/C=C/C3=C(=O)N4C=NC(=C([C@H]4c5ccc5)C(=O)OC)C)S3)/C1=O        |
| ZINC08897821 | 2.9   | 12.11             | -64.01           | 0        | 7           | -1     | 426.452         | 7              | c1ccc(cc1)[C@H]2C=C(C(=O)N2CCN3cnc3)O[C@H]4c4ccc5cccc5o4                   |
| ZINC08897821 | 3.34  | 12.72             | -47.09           | 2        | 7           | 1      | 428.468         | 6              | c1ccc(cc1)[C@H]2C=C(C(=O)N2CCN3cnc3)O[C@H]4c4ccc5cccc5o4                   |
| ZINC08897821 | 3.34  | 12.21             | -21.89           | 1        | 7           | 0      | 427.46          | 6              | c1ccc(cc1)[C@H]2C=C(C(=O)N2CCN3cnc3)O[C@H]4c4ccc5cccc5o4                   |
| ZINC08897821 | 2.9   | 12.59             | -75.7            | 1        | 7           | 0      | 427.46          | 7              | c1ccc(cc1)[C@H]2C=C(C(=O)N2CCN3cnc3)O[C@H]4c4ccc5cccc5o4                   |
| ZINC02063928 | 8.42  | 2.49              | -10.22           | 0        | 7           | 0      | 543.689         | 10             | CCCCCN1c2ccc2/C=C/C3=C(=O)N4C=NC(=C([C@H]4c5ccc5)C(=O)OC)C)S3)/C1=O        |
| ZINC08441279 | 7.33  | 0.35              | -18.8            | 2        | 5           | 0      | 497.422         | 6              | CC1ccc(cc1)C(=O)N/C=C/C2cnc(nc2c3ccc3)c4ccc4)/C(=O)NC4CCCC4                |
| ZINC08441278 | 6.12  | 0.22              | -12.46           | 1        | 7           | 0      | 539.638         | 7              | Cc1ccc(cc1)CS2nnc(s2)N3[C@H](C(=O)N2CCN3cnc3)O[C@H]4c4ccc5cccc5o4)c6ccc6   |
| ZINC08441278 | 5.54  | 0.06              | -13.49           | 0        | 7           | 0      | 539.638         | 7              | CC1ccc(cc1)CS2nnc(s2)N3[C@H](C(=O)N2CCN3cnc3)O[C@H]4c4ccc5cccc5o4)c6ccc6   |
| ZINC08441277 | 6.46  | -0.28             | -13.13           | 2        | 6           | 0      | 523.427         | 7              | CC1ccc(cc1)C(=O)N/C=C/C2cnc(nc2c3ccc3)Br)C(=O)NC4CCCC4                     |
| ZINC08441276 | 4.71  | 2.83              | -14.63           | 0        | 7           | 0      | 454.529         | 6              | CC1=C([C@H](n2c(c=O)/c(=O)c3ccc3)/s2=N1)c4ccc(cc4)OC(=O)C)C(=O)OC          |
| ZINC08441272 | 6.12  | 0.14              | -12.49           | 1        | 7           | 0      | 539.638         | 7              | CC1ccc(cc1)CS2nnc(s2)N3[C@H](C(=O)N2CCN3cnc3)O[C@H]4c4ccc5cccc5o4)c6ccc6   |
| ZINC08441272 | 5.54  | -0.03             | -14.45           | 0        | 7           | 0      | 539.638         | 7              | CC1ccc(cc1)CS2nnc(s2)N3[C@H](C(=O)N2CCN3cnc3)O[C@H]4c4ccc5cccc5o4)c6ccc6   |
| ZINC08441271 | 6.6   | 4.17              | -12.84           | 0        | 6           | 0      | 450.56          | 6              | CCOC(=O)C1=C(N=C2n(c1=O)/c(=O)c3ccc3)/s2)[C@H]1c4ccc(cc4)C)C)C)C           |
| ZINC08441270 | 5.79  | 0.64              | -13.31           | 1        | 7           | 0      | 543.601         | 7              | c1ccc(cc1)CS2nnc(s2)N3[C@H](C(=O)N2CCN3cnc3)O[C@H]4c4ccc5cccc5o4)c6ccc6F   |
| ZINC08441270 | 5.2   | 0.46              | -13.29           | 0        | 7           | 0      | 543.601         | 7              | c1ccc(cc1)CS2nnc(s2)N3[C@H](C(=O)N2CCN3cnc3)O[C@H]4c4ccc5cccc5o4)c6ccc6F   |
| ZINC08441269 | 6.6   | 4.16              | -12.82           | 0        | 6           | 0      | 450.56          | 6              | CCOC(=O)C1=C(N=C2n(c1=O)/c(=O)c3ccc3)/s2)[C@H]1c4ccc(cc4)C)C)C)C           |
| ZINC08441268 | 5.89  | 0.74              | -12.93           | 0        | 6           | 0      | 514.416         | 7              | CCOC(=O)C1=C([C@H](C2=C(C(=O)N2CCN3cnc3)O[C@H]4c4ccc5cccc5o4)Br)C)C)C      |
| ZINC08441268 | 6.08  | -0.07             | -12.27           | 0        | 6           | 0      | 514.416         | 7              | CCOC(=O)C1=C([C@H](C2=C(NC1=O)C)C(C2=O)(C)C)c3ccc(o3)C)OC4c4ccc4Br         |
| ZINC08441268 | 5.89  | 0.94              | -14.42           | 0        | 6           | 0      | 514.416         | 7              | CCOC(=O)C1=C(N=C2C(C(=O)C)C2)[C@H]1c3ccc(o3)C)OC4c4ccc4Br)C)C)C            |
| ZINC08441267 | 5     | 1.67              | -34.5            | 1        | 8           | 0      | 459.502         | 6              | CC1CCN(C1)C(=O)/C=C/C2ccc(o2)c3ccc3N+([=O])O-]/NC(=O)c4ccc4                |
| ZINC08441266 | 4.76  | 1.46              | -33.83           | 1        | 8           | 0      | 445.475         | 6              | c1ccc(cc1)C(=O)N/C=C/C2ccc(o2)c3ccc3N+([=O])O-]/C(=O)N4CCCC4               |
| ZINC08441265 | 5.79  | 0.67              | -13.35           | 1        | 7           | 0      | 543.601         | 7              | c1ccc(cc1)CS2nnc(s2)N3[C@H](C(=O)N2CCN3cnc3)O[C@H]4c4ccc5cccc5o4)c6ccc6F   |
| ZINC08441265 | 5.2   | 0.49              | -13.34           | 0        | 7           | 0      | 543.601         | 7              | c1ccc(cc1)CS2nnc(s2)N3[C@H](C(=O)N2CCN3cnc3)O[C@H]4c4ccc5cccc5o4)c6ccc6F   |
| ZINC08441264 | 5.43  | 0.44              | -11.29           | 2        | 5           | 0      | 429.303         | 5              | CC1ccc(cc1)C(=O)N/C=C/C2ccc(o2)c3ccc(cc3C)C)C(=O)NC                        |
| ZINC08441263 | 7.23  | 1.01              | -11.91           | 2        | 5           | 0      | 519.428         | 8              | CC1ccc(cc1)C(=O)N/C=C/C2ccc(o2)c3ccc(cc3C)C)C(=O)NC                        |
| ZINC08441262 | 5.89  | 0.91              | -11.62           | 0        | 6           | 0      | 514.416         | 7              | CCOC(=O)C1=C([C@H](C2=C(C(=O)N2CCN3cnc3)O[C@H]4c4ccc5cccc5o4)Br)C)C)C      |
| ZINC08441262 | 6.08  | -0.34             | -14.47           | 0        | 6           | 0      | 514.416         | 7              | CCOC(=O)C1=C([C@H](C2=C(NC1=O)C)C(C2=O)(C)C)c3ccc(o3)C)OC4c4ccc4Br         |
| ZINC08441262 | 5.89  | 0.63              | -16.82           | 0        | 6           | 0      | 514.416         | 7              | CCOC(=O)C1=C(N=C2C(C(=O)C)C2)[C@H]1c3ccc(o3)C)OC4c4ccc4Br)C)C)C            |
| ZINC08441261 | 5.77  | -0.04             | -13.33           | 1        | 8           | 0      | 568.68          | 8              | CCN(C)C1ccc(cc1)[C@H]2C=C(C(=O)N2c3nnc(s3)Sc4ccc4)O)C(=O)c5ccc6cccc6o5     |
| ZINC08441260 | 5.63  | 1.05              | -13.05           | 2        | 6           | 0      | 481.335         | 7              | c1ccc(cc1)C(=O)N/C=C/C2ccc(o2)c3ccc(cc3C)C)C(=O)NC4CCCC4                   |
| ZINC08441259 | 4.25  | 7.4               | -10.61           | 2        | 7           | 0      | 425.268         | 7              | CC1=C([C@H](NC(=O)N1)c2ccc(o2)c3ccc(cc3C)C)C)C(=O)OC                       |
| ZINC08441258 | 5.77  | 0.02              | -13.36           | 1        | 8           | 0      | 568.68          | 8              | CCN(C)C1ccc(cc1)[C@H]2C=C(C(=O)N2c3nnc(s3)Sc4ccc4)O)C(=O)c5ccc6cccc6o5     |
| ZINC08441257 | 4.25  | 7.4               | -10.77           | 2        | 7           | 0      | 425.268         | 7              | CC1=C([C@H](NC(=O)N1)c2ccc(o2)c3ccc(cc3C)C)C)C(=O)OC                       |
| ZINC02063893 | 6.78  | 0.73              | -13.72           | 2        | 5           | 0      | 505.401         | 8              | c1ccc(cc1)CCN(=O)/C=C/C2ccc(o2)c3ccc(cc3C)C)C(=O)NC4CCCC4                  |
| ZINC02063891 | 5.65  | 0.7               | -13.04           | 2        | 5           | 0      | 443.33          | 6              | CC(C)NC(=O)/C=C/C1ccc(o1)c2ccc(cc2)C)C)C(=O)c3ccc3                         |
| ZINC08441255 | 6.97  | 0.89              | -14.64           | 1        | 9           | 0      | 641.771         | 12             | CC(C)CCOC1ccc(cc1OC)[C@H]2C=C(C(=O)N2c3nnc(s3)Sc4ccc4)O)C(=O)c5ccc6cccc6o5 |

Supplementary Table S2:

Detailed table of XP Docking using Schrodinger's Glide module

| ZINC_ID      | sLogP | ApolarDesolvation | PolarDesolvation | H Donors | H Acceptors | Charge | MolecularWeight | RotatableBonds | SMILES                                                                      |
|--------------|-------|-------------------|------------------|----------|-------------|--------|-----------------|----------------|-----------------------------------------------------------------------------|
| ZINC08441255 | 6.39  | 0.67              | -17.3            | 0        | 9           | 0      | 641.771         | 12             | CC(C)CCOc1ccc(cc1)C@H]2[C@H](C(=O)N)N2c3nnc(s3)SCc4cccc4[C(=O)c5cc6cccc6605 |
| ZINC02677884 | 6.13  | 0.72              | -13.01           | 2        | 5           | 0      | 470.956         | 8              | c1ccc(cc1)CCNC(=O)/C(=C/c2ccc(o2)c3ccccc3C1)/NC(=O)c4cccc4                  |
| ZINC08441254 | 6.35  | 1.26              | -11.9            | 0        | 6           | 0      | 496.003         | 7              | CC1=NC2=C([C@H]1C(=O)O)C3ccc(c(c3)C)C4c4cccc4)OC(C(=O)C(C2)C)C              |
| ZINC08441254 | 6.35  | 1.47              | -14.88           | 0        | 6           | 0      | 496.003         | 7              | CC1=NC2=C([C@H]1C(=O)O)C3ccc(c(c3)C)C4c4cccc4)OC(C(=O)C(C2)C)C              |
| ZINC08441254 | 6.53  | 2.57              | -12.4            | 0        | 6           | 0      | 496.003         | 7              | CC1(CC2=NC(=C)C([C@H]1C(=O)N)C3ccc(c(c3)C)C4c4cccc4)OC(C(=O)C(C2)C)C        |
| ZINC08441254 | 6.53  | 1.35              | -12.58           | 0        | 6           | 0      | 496.003         | 7              | CC1(CC2=NC(=C)C([C@H]1C(=O)N)C3ccc(c(c3)C)C4c4cccc4)OC(C(=O)C(C2)C)C        |
| ZINC08441253 | 6.97  | 0.86              | -14.62           | 1        | 9           | 0      | 641.771         | 12             | CC(C)CCOc1ccc(cc1)C@H]2[C(=O)N)N2c3nnc(s3)SCc4cccc4)O(C(=O)c5cc6cccc6605    |
| ZINC08441253 | 6.39  | 0.65              | -17.37           | 0        | 9           | 0      | 641.771         | 12             | CC(C)CCOc1ccc(cc1)C@H]2[C(=O)N)N2c3nnc(s3)SCc4cccc4)O(C(=O)c5cc6cccc6605    |
| ZINC08441252 | 5.72  | 0.49              | -17.65           | 2        | 5           | 0      | 456.929         | 7              | c1ccc(cc1)CNC(=O)/C(=C/c2ccc(o2)c3ccccc3C1)/NC(=O)c4cccc4                   |
| ZINC08441251 | 7.32  | 0.08              | -14.03           | 1        | 8           | 0      | 631.735         | 10             | c1ccc(cc1)COC2ccc(cc2)C@H]3C(=O)N3c4nnc(s4)SCc5cccc5)O(C(=O)c6cc7cccc7o6    |
| ZINC08441251 | 6.74  | -0.11             | -16.03           | 0        | 8           | 0      | 631.735         | 10             | c1ccc(cc1)COC2ccc(cc2)C@H]3C(=O)N3c4nnc(s4)SCc5cccc5)O(C(=O)c6cc7cccc7o6    |
| ZINC08441250 | 6.64  | 2.09              | -16.23           | 0        | 5           | 0      | 450.947         | 5              | CC1=C([C@H](n2c(=O)/c(=C/C=C/c3ccccc3)/sc2=N1)c4cccc4)C(C(=O)OC             |
| ZINC02063871 | 6.53  | 2.14              | -10.56           | 0        | 7           | 0      | 487.581         | 6              | CCCCN1c2cccc2/C(=C/3/c(=O)n4c(=NC(=O)N3c4nnc(s4)SCc5cccc5)O(C)C)S3/C1=O     |
| ZINC08441248 | 7.32  | 0.08              | -14.1            | 1        | 8           | 0      | 631.735         | 10             | c1ccc(cc1)COC2ccc(cc2)C@H]3C(=O)N3c4nnc(s4)SCc5cccc5)O(C(=O)c6cc7cccc7o6    |
| ZINC08441248 | 6.74  | -0.1              | -16.18           | 0        | 8           | 0      | 631.735         | 10             | c1ccc(cc1)COC2ccc(cc2)C@H]3C(=O)N3c4nnc(s4)SCc5cccc5)O(C(=O)c6cc7cccc7o6    |
| ZINC02063873 | 6.53  | 2.14              | -10.51           | 0        | 7           | 0      | 487.581         | 6              | CCCCN1c2cccc2/C(=C/3/c(=O)n4c(=NC(=O)N3c4nnc(s4)SCc5cccc5)O(C)C)S3/C1=O     |
| ZINC08441247 | 6.37  | 0.38              | -13.08           | 1        | 8           | 0      | 581.675         | 10             | C=CCOc1ccc(cc1)C@H]2[C(=O)N)N2c3nnc(s3)SCc4cccc4)O(C(=O)c5cc6cccc6605       |
| ZINC08441247 | 5.79  | 0.19              | -15.06           | 0        | 8           | 0      | 581.675         | 10             | C=CCOc1ccc(cc1)C@H]2[C(=O)N)N2c3nnc(s3)SCc4cccc4)O(C(=O)c5cc6cccc6605       |
| ZINC02278020 | 5.12  | 1.91              | -13.53           | 0        | 9           | 0      | 519.579         | 6              | CCOC(=O)C1=C(N=C2n(c(=O)/c(=C/3/c4cccc4N(C3=O)C)/s2)C@H]1c5ccc(c(=O)C)OC    |
| ZINC08441246 | 6.35  | 1.35              | -11.99           | 0        | 6           | 0      | 496.003         | 7              | CC1=NC2=C([C@H]1C(=O)O)C3ccc(c(c3)C)C4c4cccc4)OC(C(=O)C(C2)C)C              |
| ZINC08441246 | 6.53  | 1.41              | -12.39           | 0        | 6           | 0      | 496.003         | 7              | CC1(CC2=NC(=C)C([C@H]1C(=O)N)C3ccc(c(c3)C)C4c4cccc4)OC(C(=O)C(C2)C)C        |
| ZINC08441246 | 6.35  | 1.29              | -15.06           | 0        | 6           | 0      | 496.003         | 7              | CC1=C([C@H]1C(=O)O)C3ccc(c(c3)C)C4c4cccc4)OC(C(=O)C(C2)C)C                  |
| ZINC08441246 | 6.53  | 2.73              | -13.83           | 0        | 6           | 0      | 496.003         | 7              | CC1(CC2=NC(=C)C([C@H]1C(=O)N)C3ccc(c(c3)C)C4c4cccc4)OC(C(=O)C(C2)C)C        |
| ZINC02282020 | 4.2   | -0.97             | -18.27           | 2        | 9           | 0      | 502.552         | 6              | CCOC(=O)C1=C(N=C2n(c(=O)/c(=C/3/c4cccc4N(C3=O)C)/s2)C@H]1c5cccc5)C          |
| ZINC02282022 | 4.2   | -1.09             | -18.35           | 2        | 9           | 0      | 502.552         | 6              | CCOC(=O)C1=C(N=C2n(c(=O)/c(=C/3/c4cccc4N(C3=O)C)/s2)C@H]1c5cccc5)C          |
| ZINC08441245 | 7.25  | 2.57              | -15.21           | 0        | 5           | 0      | 532.665         | 3              | Cn1c(=O)/c(=C/C=C/2/C(=O)N2c3nnc(s3)SCc4cccc4)C(C)C/s1=C5C(=O)c6cccc6C5=O   |
| ZINC08441244 | 6.37  | 0.36              | -13.11           | 1        | 8           | 0      | 581.675         | 10             | C=CCOc1ccc(cc1)C@H]2[C(=O)N)N2c3nnc(s3)SCc4cccc4)O(C(=O)c5cc6cccc6605       |
| ZINC08441244 | 5.79  | 0.17              | -15.04           | 0        | 8           | 0      | 581.675         | 10             | C=CCOc1ccc(cc1)C@H]2[C(=O)N)N2c3nnc(s3)SCc4cccc4)O(C(=O)c5cc6cccc6605       |
| ZINC06474045 | 6.18  | -1.4              | -11.36           | 1        | 5           | 0      | 487.401         | 4              | c1ccc(cc1)c2c3ccc(ccc3n2)N4cccc4)C(=O)N5CCCC5)Br                            |
| ZINC08441243 | 5.3   | 0.82              | -14.78           | 1        | 10          | 0      | 615.689         | 10             | COC1ccc(cc1)C@H]2[C(=O)N)N2c3nnc(s3)SCc4cccc4)O(C(=O)c5cc6cccc6605          |
| ZINC08441243 | 4.72  | 0.85              | -15.92           | 0        | 10          | 0      | 615.689         | 10             | COC1ccc(cc1)C@H]2[C(=O)N)N2c3nnc(s3)SCc4cccc4)O(C(=O)c5cc6cccc6605          |
| ZINC08441242 | 7.51  | 0.7               | -9.77            | 0        | 6           | 0      | 589.926         | 8              | CCOC(=O)C1=C(N=C2C(C(=O)C)C)N=C1C3ccc(c(c3)C)C4c4cccc4)OC(C)C               |
| ZINC08441242 | 7.69  | -0.48             | -10.21           | 0        | 6           | 0      | 589.926         | 8              | CCOC(=O)C1=C(N=C2C(C(=O)C)C)N=C1C3ccc(c(c3)C)C4c4cccc4)OC(C)C               |
| ZINC08441242 | 7.51  | 0.62              | -13.33           | 0        | 6           | 0      | 589.926         | 8              | CCOC(=O)C1=C(N=C2C(C(=O)C)C)N=C1C3ccc(c(c3)C)C4c4cccc4)OC(C)C               |
| ZINC08441241 | 5.3   | 0.71              | -15.82           | 1        | 10          | 0      | 615.689         | 10             | COC1ccc(cc1)C@H]2[C(=O)N)N2c3nnc(s3)SCc4cccc4)O(C(=O)c5cc6cccc6605          |
| ZINC08441241 | 4.72  | 0.5               | -17.91           | 0        | 10          | 0      | 615.689         | 10             | COC1ccc(cc1)C@H]2[C(=O)N)N2c3nnc(s3)SCc4cccc4)O(C(=O)c5cc6cccc6605          |
| ZINC0851613  | 4.79  | 0.65              | -10.16           | 0        | 8           | 0      | 465.872         | 4              | Cn1c2c(c(=O)n(c1=O)C)n(c(n2)Sc3cccc3)C4ccc(c(=O)C)C                         |
| ZINC0851613  | 4.79  | 1.02              | -35.34           | 1        | 8           | 1      | 466.88          | 4              | Cn1c2c(c(=O)n(c1=O)C)n(c(n2)Sc3cccc3)C4ccc(c(=O)C)C                         |
| ZINC0851292  | 5.39  | 0.26              | -10.36           | 0        | 6           | 0      | 447.347         | 4              | Cn1c2c(c(=O)n(c1=O)C)n(c(n2)Sc3cccc3)C4ccc(c(=O)C)C                         |
| ZINC0851292  | 5.39  | 0.49              | -36.02           | 1        | 6           | 1      | 448.355         | 4              | Cn1c2c(c(=O)n(c1=O)C)n(c(n2)Sc3cccc3)C4ccc(c(=O)C)C                         |
| ZINC0851289  | 4.91  | -1.12             | -8.83            | 0        | 9           | 0      | 475.288         | 4              | Cn1c2c(c(=O)n(c1=O)C)n(c(n2)Sc3cccc3)C4ccc(c(=O)C)C                         |
| ZINC0851289  | 4.91  | -0.26             | -34.02           | 1        | 9           | 1      | 476.296         | 4              | Cn1c2c(c(=O)n(c1=O)C)n(c(n2)Sc3cccc3)C4ccc(c(=O)C)C                         |
| ZINC08441240 | 6.59  | 0.3               | -12.25           | 1        | 7           | 0      | 553.665         | 8              | CC1ccc(cc1)C@H]2[C(=O)N)N2c3nnc(s3)SCc4cccc4)O(C(=O)c5cc6cccc6605           |
| ZINC08441240 | 6     | 0.14              | -13.29           | 0        | 7           | 0      | 553.665         | 8              | CC1ccc(cc1)C@H]2[C(=O)N)N2c3nnc(s3)SCc4cccc4)O(C(=O)c5cc6cccc6605           |
| ZINC08441239 | 4.05  | -2.58             | -16.54           | 1        | 8           | 0      | 435.259         | 6              | c1ccc(cc1)c2nnc(o2)SCC(=O)Nc3ccc(cc3)N+([=O])O-]Br                          |
| ZINC08441238 | 7.51  | 0.89              | -10.18           | 0        | 6           | 0      | 589.926         | 8              | CCOC(=O)C1=C(N=C2C(C(=O)C)C)N=C1C3ccc(c(c3)C)C4c4cccc4)OC(C)C               |
| ZINC08441238 | 7.51  | 0.53              | -12.86           | 0        | 6           | 0      | 589.926         | 8              | CCOC(=O)C1=C(N=C2C(C(=O)C)C)N=C1C3ccc(c(c3)C)C4c4cccc4)OC(C)C               |
| ZINC08441238 | 7.69  | -0.39             | -10.43           | 0        | 6           | 0      | 589.926         | 8              | CCOC(=O)C1=C(N=C2C(C(=O)C)C)N=C1C3ccc(c(c3)C)C4c4cccc4)OC(C)C               |
| ZINC0851197  | 4.03  | -2.59             | -20.36           | 1        | 8           | 0      | 435.259         | 6              | c1ccc(cc1)c2nnc(o2)SCC(=O)Nc3ccc(cc3)N+([=O])O-]Br                          |
| ZINC08441237 | 6.76  | -2.08             | -17.99           | 0        | 5           | 0      | 498.435         | 4              | Cc1ccc(cc1)N2CCN(CC2)C3=NC(=O)/C(=C/c4ccc(o4)c5ccc(cc5)C)C1/S3              |
| ZINC08441236 | 6.59  | 0.36              | -12.28           | 1        | 7           | 0      | 553.665         | 8              | CC1ccc(cc1)C@H]2[C(=O)N)N2c3nnc(s3)SCc4cccc4)O(C(=O)c5cc6cccc6605           |
| ZINC08441236 | 6     | 0.17              | -14.16           | 0        | 7           | 0      | 553.665         | 8              | CC1ccc(cc1)C@H]2[C(=O)N)N2c3nnc(s3)SCc4cccc4)O(C(=O)c5cc6cccc6605           |
| ZINC08441234 | 4.69  | 0.19              | -64.15           | 1        | 8           | 0      | 475.55          | 6              | c1ccc(cc1)C[NH+]2CCN(CC2)C3=NC(=O)/C(=C/c4ccc(o4)c5ccc(cc5)N+([=O])O-]S3    |
| ZINC08441232 | 5.43  | -1.76             | -22.99           | 0        | 8           | 0      | 474.542         | 5              | Cc1ccc(cc1)N2CCN(CC2)C3=NC(=O)/C(=C/c4ccc(o4)c5ccc(cc5)N+([=O])O-]S3        |
| ZINC08441231 | 6     | 3.75              | -12.03           | 0        | 6           | 0      | 503.517         | 8              | CCOC(=O)C1=C(N=C2C(C(=O)C)C)N=C1C3ccc(c(c3)C)C4c4cccc4)OC(F)F               |
| ZINC08441231 | 6.19  | 2.79              | -12.53           | 0        | 6           | 0      | 503.517         | 8              | CCOC(=O)C1=C(N=C2C(C(=O)C)C)N=C1C3ccc(c(c3)C)C4c4cccc4)OC(F)F               |
| ZINC08441231 | 6     | 3.82              | -14.1            | 0        | 6           | 0      | 503.517         | 8              | CCOC(=O)C1=C(N=C2C(C(=O)C)C)N=C1C3ccc(c(c3)C)C4c4cccc4)OC(F)F               |
| ZINC08441230 | 5.39  | -1.58             | -14.41           | 2        | 9           | 0      | 585.663         | 9              | CCOc1ccc(cc1)C@H]2[C(=O)N)N2c3nnc(s3)SCc4cccc4)O(C(=O)c5cc6cccc6605         |
| ZINC08441230 | 4.8   | -1.79             | -16.94           | 1        | 9           | 0      | 585.663         | 9              | CCOc1ccc(cc1)C@H]2[C(=O)N)N2c3nnc(s3)SCc4cccc4)O(C(=O)c5cc6cccc6605         |
| ZINC08441229 | 5.41  | -1.75             | -22.95           | 0        | 8           | 0      | 474.542         | 5              | Cc1ccc(cc1)N2CCN(CC2)C3=NC(=O)/C(=C/c4ccc(o4)c5ccc(cc5)N+([=O])O-]S3        |
| ZINC05013440 | 3.05  | 0.08              | -44.79           | 2        | 3           | 1      | 250.362         | 5              | COC1ccc(cc1)C[NH2+]C2CCCC2                                                  |













**Supplementary Table S2:  
Detailed table of XP Docking using Schrodinger's Glide module**

| ZINC_ID      | sLogP | ApolarDesolvation | PolarDesolvation | H Donors | H Acceptors | Charge | MolecularWeight | RotatableBonds | SMILES                                                                    |
|--------------|-------|-------------------|------------------|----------|-------------|--------|-----------------|----------------|---------------------------------------------------------------------------|
| ZINC08441074 | 5.57  | 0.49              | -9.92            | 0        | 6           | 0      | 500.389         | 6              | CC1=NC2=C([C@@H](C1C(=O)OC)c3ccc(o3)C0c4ccc(cc4)Br)C(=O)CC(C2)C)C         |
| ZINC08441074 | 5.75  | 0.5               | -11.71           | 0        | 6           | 0      | 500.389         | 6              | CC1(CC2=NC(=C)C([C@@H](C2C(=O)C1)c3ccc(o3)C0c4ccc(cc4)Br)C(=O)OC)C        |
| ZINC08441074 | 5.75  | 1.67              | -10.35           | 0        | 6           | 0      | 500.389         | 6              | CC1(CC2=NC(=C)C([C@@H](C2C(=O)C1)c3ccc(o3)C0c4ccc(cc4)Br)C(=O)OC)C        |
| ZINC08441074 | 5.57  | 0.53              | -14.09           | 0        | 6           | 0      | 500.389         | 6              | CC1=C([C@@H](C(=O)OC)C2C(=O)C1)c3ccc(o3)C0c4ccc(cc4)Br)C(=O)OC            |
| ZINC08771456 | 7.13  | 14.54             | -58.55           | 0        | 5           | -1     | 501.653         | 6              | CCc1ccc2c(c1)sc(n2)N3[C@@H](C=C(C3=O))O-]C(=O)e4ccc4)c5ccc(cc5)C(C)C      |
| ZINC08915059 | 7.13  | 14.57             | -58.33           | 0        | 5           | -1     | 501.653         | 6              | CCc1ccc2c(c1)sc(n2)N3[C@@H](C=C(C3=O))O-]C(=O)e4ccc4)c5ccc(cc5)C(C)C      |
| ZINC08915059 | 7.57  | 13.75             | -17.74           | 1        | 5           | 0      | 502.661         | 5              | CCc1ccc2c(c1)sc(n2)N3[C@@H](C=C(C3=O))O-]C(=O)e4ccc4)c5ccc(cc5)C(C)C      |
| ZINC08441071 | 7.32  | 1.8               | -15.43           | 1        | 4           | 0      | 485.612         | 6              | Cc1ccc2ccc2c1NC(=O)CSc2c(c(cc(n2)c3ccc3)c4ccc4)c5ccc5C#N                  |
| ZINC08441070 | 6.58  | 1.74              | -15.12           | 1        | 4           | 0      | 449.579         | 6              | Cc1cc(ccc1)NC(=O)CSc2c(c(cc(n2)c3ccc3)c4ccc4)C#N                          |
| ZINC08441069 | 6.5   | 13.69             | -50.28           | 0        | 5           | -1     | 536.402         | 5              | CCc1ccc2c(c1)sc(n2)N3[C@@H](C=C(C3=O))O-]C(=O)e4ccc(cc4)F)c5ccc(cc5)Br    |
| ZINC08441069 | 5.91  | -0.62             | -15.21           | 0        | 5           | 0      | 537.41          | 5              | CCc1ccc2c(c1)sc(n2)N3[C@@H](C(=O)C3=O)C(=O)e4ccc(cc4)F)c5ccc(cc5)Br       |
| ZINC08441066 | 4.91  | 0.73              | -19.13           | 1        | 6           | 0      | 535.407         | 6              | CCOC(=O)c1c2c(sc1N/C=C\3/C(=NN(C3=O)e4ccc(cc4)C)C)CC2                     |
| ZINC08441065 | 5.57  | 0.51              | -10.65           | 0        | 6           | 0      | 500.389         | 6              | CC1=NC2=C([C@@H](C1C(=O)OC)c3ccc(o3)C0c4ccc(cc4)Br)C(=O)CC(C2)C           |
| ZINC08441065 | 5.75  | 1.97              | -12.37           | 0        | 6           | 0      | 500.389         | 6              | CC1(CC2=NC(=C)C([C@@H](C2C(=O)C1)c3ccc(o3)C0c4ccc(cc4)Br)C(=O)OC)C        |
| ZINC08441065 | 5.75  | 0.52              | -10.48           | 0        | 6           | 0      | 500.389         | 6              | CC1(CC2=NC(=C)C([C@@H](C2C(=O)C1)c3ccc(o3)C0c4ccc(cc4)Br)C(=O)OC)C        |
| ZINC08441065 | 5.57  | 0.58              | -12              | 0        | 6           | 0      | 500.389         | 6              | CC1=C([C@@H](C(=O)OC)C2C(=O)C1)c3ccc(o3)C0c4ccc(cc4)Br)C(=O)OC            |
| ZINC08441064 | 6.5   | 13.66             | -50.16           | 0        | 5           | -1     | 536.402         | 5              | CCc1ccc2c(c1)sc(n2)N3[C@@H](C=C(C3=O))O-]C(=O)e4ccc(cc4)F)c5ccc(cc5)Br    |
| ZINC08441064 | 5.91  | -0.61             | -15.17           | 0        | 5           | 0      | 537.41          | 5              | CCc1ccc2c(c1)sc(n2)N3[C@@H](C(=O)C3=O)C(=O)e4ccc(cc4)F)c5ccc(cc5)Br       |
| ZINC02063637 | 6.32  | 2.37              | -10.87           | 1        | 4           | 0      | 467.266         | 4              | c1cc(ccc1)Nc2nc(cs2)c3cc4cc(ccc4o3=O)Br)C(F)F                             |
| ZINC0856352  | 5.57  | 10.65             | -12.51           | 1        | 5           | 0      | 418.366         | 5              | CCc1ccc2c(c1)cc(c(=O)o2)c3ccc(n3)Nc4ccc(cc4)C(F)F                         |
| ZINC08441063 | 7.01  | 14.15             | -50.33           | 0        | 5           | -1     | 552.857         | 5              | CCc1ccc2c(c1)sc(n2)N3[C@@H](C=C(C3=O))O-]C(=O)e4ccc(cc4)C)c5ccc(cc5)Br    |
| ZINC08441063 | 7.46  | -1.74             | -25.78           | 1        | 5           | 0      | 553.865         | 4              | CCc1ccc2c(c1)sc(n2)N3[C@@H](C=C(c4ccc(cc4)O)C(=O)C3=O)e5ccc(cc5)Br        |
| ZINC08441063 | 6.43  | -1.51             | -14.85           | 0        | 5           | 0      | 553.865         | 5              | CCc1ccc2c(c1)sc(n2)N3[C@@H](C(=O)C3=O)C(=O)e4ccc(cc4)C)c5ccc(cc5)Br       |
| ZINC02063636 | 7.97  | 1.12              | -13.18           | 2        | 7           | 0      | 492.577         | 11             | CCCCCc1cc2cc(c(=O)oc2cc1O)c3ccc(n3)Nc4ccc(cc4)C(=O)OCC                    |
| ZINC08441062 | 7.01  | 14.11             | -50.19           | 0        | 5           | -1     | 552.857         | 5              | CCc1ccc2c(c1)sc(n2)N3[C@@H](C=C(C3=O))O-]C(=O)e4ccc(cc4)C)c5ccc(cc5)Br    |
| ZINC08441062 | 7.46  | -1.72             | -25.28           | 1        | 5           | 0      | 553.865         | 4              | CCc1ccc2c(c1)sc(n2)N3[C@@H](C=C(c4ccc(cc4)O)C(=O)C3=O)e5ccc(cc5)Br        |
| ZINC08441062 | 6.43  | -1.5              | -14.64           | 0        | 5           | 0      | 553.865         | 5              | CCc1ccc2c(c1)sc(n2)N3[C@@H](C(=O)C3=O)C(=O)e4ccc(cc4)C)c5ccc(cc5)Br       |
| ZINC0856338  | 5.86  | 12.45             | -10.93           | 1        | 6           | 0      | 426.881         | 6              | CCOC(=O)c1ccc(cc1)Nc2nc(cs2)c3cc4cc(ccc4o3=O)Cl                           |
| ZINC0856337  | 5.22  | 2.26              | -16.36           | 1        | 7           | 0      | 422.462         | 7              | CCOC(=O)c1ccc(cc1)Nc2nc(cs2)c3cc4cc(ccc4o3=O)OC                           |
| ZINC02063635 | 6.37  | 2.14              | -13.57           | 1        | 6           | 0      | 442.496         | 6              | CCOC(=O)c1ccc(cc1)Nc2nc(cs2)c3cc4cc5ccc5ccc4o3=O                          |
| ZINC08441061 | 6.06  | 0.79              | -11.34           | 0        | 6           | 0      | 560.492         | 6              | CC1=NC2=C([C@@H](C1C(=O)OC)c3cn(nc3c4ccc4)C5ccc(cc5)Br)C(=O)CC(C2)C       |
| ZINC08441061 | 6.25  | 1.19              | -12.94           | 0        | 6           | 0      | 560.492         | 6              | CC1(CC2=NC(=C)C([C@@H](C2C(=O)C1)c3cn(nc3c4ccc4)C5ccc(cc5)Br)C(=O)OC)C    |
| ZINC08441061 | 6.06  | 1.27              | -15.43           | 0        | 6           | 0      | 560.492         | 6              | CC1=C([C@@H](C(=O)OC)C2C(=O)C1)c3cn(nc3c4ccc4)C5ccc(cc5)Br)C(=O)OC        |
| ZINC08441061 | 6.25  | 2.1               | -11.74           | 0        | 6           | 0      | 560.492         | 6              | CC1(CC2=NC(=C)C([C@@H](C2C(=O)C1)c3cn(nc3c4ccc4)C5ccc(cc5)Br)C(=O)OC)C    |
| ZINC08441060 | 7.91  | 15.84             | -54.29           | 0        | 5           | -1     | 530.069         | 6              | CCc1ccc2c(c1)sc(n2)N3[C@@H](C=C(C3=O))O-]C(=O)e4ccc(cc4)C)c5ccc(cc5)C(C)C |
| ZINC08441060 | 7.32  | 0.41              | -14.37           | 0        | 5           | 0      | 531.077         | 6              | CCc1ccc2c(c1)sc(n2)N3[C@@H](C(=O)C3=O)C(=O)e4ccc(cc4)C)c5ccc(cc5)C(C)C    |
| ZINC0856322  | 5.03  | 0.83              | -10.48           | 0        | 5           | 0      | 427.279         | 2              | CCOC1ccc2c(c1)sc3n2cc(n3)c4cc5ccc(ccc5o4=O)Br                             |
| ZINC0856315  | 5.77  | 1.68              | -13.87           | 1        | 7           | 0      | 431.473         | 5              | CCOC1ccc(c1)OCNc2nnc(s2)c3cc4ccc(ccc4o3=O)Br                              |
| ZINC0856312  | 5.49  | 1.35              | -13.21           | 1        | 5           | 0      | 418.247         | 3              | c1ccc(cc1)FNe2nnc(s2)c3cc4ccc(ccc4o3=O)Br                                 |
| ZINC08441059 | 7.91  | 15.81             | -54.11           | 0        | 5           | -1     | 530.069         | 6              | CCc1ccc2c(c1)sc(n2)N3[C@@H](C=C(C3=O))O-]C(=O)e4ccc(cc4)C)c5ccc(cc5)C(C)C |
| ZINC08441059 | 7.32  | 0.42              | -14.34           | 0        | 5           | 0      | 531.077         | 6              | CCc1ccc2c(c1)sc(n2)N3[C@@H](C(=O)C3=O)C(=O)e4ccc(cc4)C)c5ccc(cc5)C(C)C    |
| ZINC02063632 | 6.09  | -0.14             | -11.19           | 1        | 5           | 0      | 479.153         | 3              | c1ccc(cc1)Nc2nnc(s2)c3cc4ccc(ccc4o3=O)Br                                  |
| ZINC09357898 | 2.52  | 11.62             | -70.7            | 1        | 8           | 0      | 479.92          | 7              | c1cc(ccc1)C@H]2C(=C(=O)N2CCn3cc(nh+3)O-]C(=O)e4ccc5(c4)OCCO5)Cl           |
| ZINC09357898 | 2.52  | 11.11             | -63.77           | 0        | 8           | -1     | 478.912         | 7              | c1cc(ccc1)C@H]2C(=C(=O)N2CCn3ccn3)O-]C(=O)e4ccc5(c4)OCCO5)Cl              |
| ZINC02063630 | 6.56  | 2.23              | -14.88           | 1        | 6           | 0      | 442.544         | 6              | CCN(CC)c1ccc2cc(c(=O)nc2e1)c3nnc(s3)Nc4ccc5e4ccc5                         |
| ZINC02063629 | 6.24  | 1.52              | -13.71           | 1        | 6           | 0      | 434.304         | 5              | CCOC1ccc2c1oc(=O)c2)c3nnc(s3)Nc4ccc(cc4)Cl                                |
| ZINC02063628 | 6.54  | 0.7               | -12.75           | 1        | 5           | 0      | 450.317         | 3              | c1ccc2c(c1)ccc3c2cc(c(=O)o3)c4nnc(s4)Nc5ccc(cc5)Br                        |
| ZINC0856288  | 5.15  | 2.45              | -15.71           | 1        | 8           | 0      | 423.45          | 7              | CCOC(=O)c1ccc(cc1)Nc2nnc(s2)c3cc4ccc(ccc4o3=O)OC                          |
| ZINC08996455 | 2.4   | 7.58              | -49.17           | 2        | 9           | 1      | 469.514         | 7              | C[NH+]([C]CCN1[C@@H](C=C1)/C=C1/c2ccc3(c2)OCCO3)O]C(=O)C1=O)e4ccc(ccc4)OC |
| ZINC08996455 | 1.37  | 8.24              | -48.96           | 1        | 9           | 1      | 469.514         | 8              | C[NH+]([C]CCN1[C@@H](C=C1)/C=C1/c2ccc3(c2)OCCO3)O]C(=O)C1=O)e4ccc(ccc4)OC |
| ZINC08441056 | 6.06  | 0.93              | -12.26           | 0        | 6           | 0      | 560.492         | 6              | CC1=NC2=C([C@@H](C1C(=O)OC)c3cn(nc3c4ccc4)C5ccc(cc5)Br)C(=O)CC(C2)C       |
| ZINC08441056 | 6.25  | 2.24              | -12.59           | 0        | 6           | 0      | 560.492         | 6              | CC1(CC2=NC(=C)C([C@@H](C2C(=O)C1)c3cn(nc3c4ccc4)C5ccc(cc5)Br)C(=O)OC)C    |
| ZINC08441056 | 6.06  | 1.4               | -14.16           | 0        | 6           | 0      | 560.492         | 6              | CC1=C([C@@H](C(=O)OC)C2C(=O)C1)c3cn(nc3c4ccc4)C5ccc(cc5)Br)C(=O)OC        |
| ZINC08441056 | 6.25  | 1.32              | -12.59           | 0        | 6           | 0      | 560.492         | 6              | CC1(CC2=NC(=C)C([C@@H](C2C(=O)C1)c3cn(nc3c4ccc4)C5ccc(cc5)Br)C(=O)OC)C    |
| ZINC0856284  | 5.47  | 3.56              | -11.7            | 1        | 6           | 0      | 419.384         | 5              | CCc1ccc2c(c1)cc(c(=O)o2)c3nnc(s3)Nc4ccc(cc4)C(F)F                         |
| ZINC02063627 | 6.51  | 1                 | -11.71           | 1        | 5           | 0      | 450.317         | 3              | c1ccc2c(c1)cccc2Nc3nnc(s3)c4ccc5ccc5o4=O)Br                               |
| ZINC08996454 | 2.4   | 6.67              | -50.62           | 2        | 9           | 1      | 469.514         | 7              | C[NH+]([C]CCN1[C@@H](C=C1)/C=C1/c2ccc3(c2)OCCO3)O]C(=O)C1=O)e4ccc(ccc4)OC |
| ZINC08441053 | 6.28  | 12.89             | -54.04           | 0        | 6           | -1     | 548.438         | 5              | CCc1ccc2c(c1)sc(n2)N3[C@@H](C=C(C3=O))O-]C(=O)e4ccc(cc4)C)c5ccc(cc5)Br    |
| ZINC08441053 | 5.69  | -1.07             | -14.87           | 0        | 6           | 0      | 549.446         | 5              | CCc1ccc2c(c1)sc(n2)N3[C@@H](C(=O)C3=O)C(=O)e4ccc(cc4)C)c5ccc(cc5)Br       |
| ZINC0856250  | 4.52  | 1.25              | -15.8            | 0        | 8           | 0      | 430.416         | 5              | CCc1cc(ccc1)OC)C2nnc(o2)c3cc4c5ccc5ccc4o3=O                               |
| ZINC08441052 | 6.09  | 8.55              | -28.88           | 2        | 4           | 1      | 414.304         | 2              | Cc1ccc(cc1)c2ccc(n2)c3ccc4cc4o3=O)Br                                      |

**Supplementary Table S2:  
Detailed table of XP Docking using Schrodinger's Glide module**

| ZINC_ID      | sLogP | ApolarDesolvation | PolarDesolvation | H Donors | H Acceptors | Charge | MolecularWeight | RotatableBonds | SMILES                                                                                          |
|--------------|-------|-------------------|------------------|----------|-------------|--------|-----------------|----------------|-------------------------------------------------------------------------------------------------|
| ZINC08441052 | 6.09  | 8.25              | -30.56           | 2        | 4           | 1      | 414.304         | 2              | Cc1ccc(cc1)c2csc(n2)c3ccc4ccc4o/c3=[NH+]/O)Br                                                   |
| ZINC08441051 | 5.83  | 0                 | -12.25           | 0        | 6           | 0      | 512.4           | 7              | CC1=NC2=C([C@@H](C1C(=O)OC)c3ccc(c(c3)COC4=O)CCCC4=O)CCC2                                       |
| ZINC08441051 | 6.01  | 0.26              | -13.48           | 0        | 6           | 0      | 512.4           | 7              | COC1ccc(cc1)COC2c3ccc2Br][C@H]3[C4C(=NC(=C)C3C(=O)OC)CCCC4=O                                    |
| ZINC08441051 | 6.01  | 1.31              | -13.81           | 0        | 6           | 0      | 512.4           | 7              | COC1ccc(cc1)COC2c3ccc2Br][C@H]3[C4C(=NC(=C)C3C(=O)OC)CCCC4=O                                    |
| ZINC08441051 | 5.83  | 0.1               | -15.75           | 0        | 6           | 0      | 512.4           | 7              | CC1=C([C@@H]([C@H]2C(=N1)CCCC2=O)c3ccc(c(c3)COC4=O)C)C(=O)OC                                    |
| ZINC08441050 | 6.28  | 12.86             | -53.92           | 0        | 6           | -1     | 548.438         | 5              | Cc1ccc2c(c1)sc(n2)N3[C@@H]([C(=C(C3=O))O-])C(=O)c4ccc(c(c4)C)OC)c5ccc(c5)Br                     |
| ZINC08441050 | 5.69  | -1.06             | -18.06           | 0        | 6           | 0      | 549.446         | 5              | Cc1ccc2c(c1)sc(n2)N3[C@@H]([C@@H]([C(=O)C3=O]C(=O)c4ccc(c(c4)C)OC)c5ccc(c5)Br                   |
| ZINC08441046 | 4.82  | -5.13             | -16.06           | 0        | 5           | 0      | 476.179         | 2              | c1ccc(cc1)N2[C@@H]3CS(=O)=O)C[C@H]3N(C2=O)c4ccc(c(c4)C)C1)Br                                    |
| ZINC08441045 | 7.02  | 12.61             | -12.45           | 1        | 6           | 0      | 448.544         | 7              | CCCCCc1cc2cc(c(=O)oc2cc1O)c3cn4c5ccc(cc5sc4n3)OC                                                |
| ZINC0970921  | 5.43  | 1.14              | -10.9            | 0        | 4           | 0      | 411.28          | 1              | Cc1ccc2c(c1)sc3n2cc(n3)c4cc5ccc5oc4=O)Br                                                        |
| ZINC08441044 | 4.82  | -4.7              | -25.11           | 0        | 5           | 0      | 476.179         | 2              | c1ccc(cc1)N2[C@@H]3CS(=O)=O)C[C@H]3N(C2=O)c4ccc(c(c4)C)C1)Br                                    |
| ZINC02063584 | 6.6   | 12.94             | -12.11           | 1        | 5           | 0      | 439.418         | 4              | c1ccc2c(c1)ccc3c2cc(c(=O)O)c3[nnc](s4)Nc5ccc(c5)C(F)F                                           |
| ZINC08441042 | 6.98  | 2.23              | -12.38           | 0        | 4           | 0      | 435.523         | 6              | COC1ccc(cc1)c2cc3ccc(c(cc3c(n2)C)c4ccc5c4ccc5)OC)OC                                             |
| ZINC08441041 | 4.19  | -5                | -19.44           | 0        | 5           | 0      | 441.734         | 2              | c1ccc(cc1)N2[C@@H]3CS(=O)=O)C[C@H]3N(C2=O)c4ccc(cc4)Br                                          |
| ZINC08441040 | 5.83  | -0.03             | -12.29           | 0        | 6           | 0      | 512.4           | 7              | CC1=NC2=C([C@@H](C1C(=O)OC)c3ccc(c(c3)COC4=O)C)C(=O)CCC2                                        |
| ZINC08441040 | 6.01  | 1.45              | -19.17           | 0        | 6           | 0      | 512.4           | 7              | COC1ccc(cc1)COC2c3ccc2Br][C@H]3[C4C(=NC(=C)C3C(=O)OC)CCCC4=O                                    |
| ZINC08441040 | 6.01  | 0.03              | -13.07           | 0        | 6           | 0      | 512.4           | 7              | COC1ccc(cc1)COC2c3ccc2Br][C@H]3[C4C(=NC(=C)C3C(=O)OC)CCCC4=O                                    |
| ZINC08441040 | 5.83  | -0.09             | -15.79           | 0        | 6           | 0      | 512.4           | 7              | CC1=C([C@@H]([C@H]2C(=N1)CCCC2=O)c3ccc(c(c3)COC4=O)C)C(=O)OC                                    |
| ZINC02063579 | 5.45  | 2.91              | -18.99           | 2        | 4           | 0      | 505.267         | 8              | c1ccc(cc1)C(F)F)NC(=O)CSCC(=O)Nc2cc(ccc2C(F)F)F                                                 |
| ZINC08441039 | 4.19  | -4.53             | -21.12           | 0        | 5           | 0      | 441.734         | 2              | c1ccc(cc1)N2[C@@H]3CS(=O)=O)C[C@H]3N(C2=O)c4ccc(cc4)Br                                          |
| ZINC0849797  | 4.79  | -3.8              | -9.22            | 1        | 5           | 0      | 424.707         | 5              | c1ccc(cc1)N(C)C(=O)CSc2nnc(o2)c3ccc(cc3)Br                                                      |
| ZINC0849793  | 5.01  | -1.47             | -9.69            | 1        | 5           | 0      | 485.259         | 6              | c1ccc(cc1)N(C)C(=O)CSc2nnc(o2)c3ccc(cc3)Br)C(F)F                                                |
| ZINC06144687 | 4.08  | -5.4              | -18.59           | 0        | 4           | 0      | 423.357         | 2              | c1ccc(cc1)N2[C@@H]3CS(=O)=O)C[C@H]3N(C2=O)c4ccc(cc4)Br                                          |
| ZINC06144685 | 4.08  | -5.02             | -20.85           | 0        | 4           | 0      | 423.357         | 2              | c1ccc(cc1)N2[C@@H]3CS(=O)=O)C[C@H]3N(C2=O)c4ccc(cc4)Br                                          |
| ZINC08441038 | 6.58  | 1.97              | -15.07           | 1        | 4           | 0      | 449.579         | 6              | Cc1ccc(c(c1)NC(=O)C)Sc2c(c(cc2)C)C3CCCC3)c4ccc(c4)C#N)C                                         |
| ZINC06474284 | 5.97  | 13.2              | -14.06           | 1        | 4           | 0      | 427.573         | 6              | c1ccc(cc1)c2cc(nc(c2C#N)SCC(=O)N)C3CCCC3)c4ccc4                                                 |
| ZINC0850105  | 4.78  | 11.5              | -20.9            | 3        | 7           | 0      | 491.547         | 6              | Cc1ccc(c1)NC(=O)COC2ccc(cc2O)C[C@H]3C4ccc5ccc5c4OC(=C3C#N)N                                     |
| ZINC08441037 | 5.15  | -1.79             | -8.55            | 0        | 3           | 0      | 567.135         | 3              | CC1([C@@]2(CC)C@1([C@@H]2Br)C(=O)N3CCN(CC3)c4ccc(cc4)F)(Br)Br)C                                 |
| ZINC08441036 | 4.91  | -0.22             | -10.83           | 0        | 6           | 0      | 472.335         | 6              | CC1=NC2=C([C@@H](C1C(=O)OC)c3ccc(c(c3)COC4=O)C)C(=O)CCC2                                        |
| ZINC08441036 | 4.91  | -0.23             | -15.88           | 0        | 6           | 0      | 472.335         | 6              | CC1=C([C@@H]([C@H]2C(=N1)CCCC2=O)c3ccc(c(c3)COC4=O)C)C(=O)OC                                    |
| ZINC08441036 | 5.09  | 1.18              | -13.22           | 0        | 6           | 0      | 472.335         | 6              | COC(=O)C1[C@@H]([C@@H]2C(=NC1=O)CCCC2=O)c3ccc(c3)COC4ccc(cc4)Br                                 |
| ZINC08441036 | 5.09  | -0.16             | -12.83           | 0        | 6           | 0      | 472.335         | 6              | COC(=O)C1[C@@H]([C@@H]2C(=NC1=O)CCCC2=O)c3ccc(c3)COC4ccc(cc4)Br                                 |
| ZINC0850102  | 3.96  | 1.09              | -28.63           | 3        | 8           | 0      | 487.556         | 6              | Cc1ccc(c1)NC(=O)COC2ccc(cc2O)C[C@H]3C(=O)C4=C3C(=O)C(C4)C)N)C#N                                 |
| ZINC08441035 | 5.15  | -1.79             | -7.19            | 0        | 3           | 0      | 567.135         | 3              | CC1([C@@]2(CC)C@1([C@@H]2Br)C(=O)N3CCN(CC3)c4ccc(cc4)F)(Br)Br)C                                 |
| ZINC0850103  | 3.96  | 1.08              | -28.7            | 3        | 8           | 0      | 487.556         | 6              | Cc1ccc(c1)NC(=O)COC2ccc(cc2O)C[C@H]3C(=O)C4=C3C(=O)C(C4)C)N)C#N                                 |
| ZINC08441034 | 5.35  | 14.56             | -17.57           | 2        | 6           | 0      | 554.731         | 6              | C[C@]12C[C@@]([C1]C)C(C2=O)C(=O)Nc3ccc(cc3)Cc4ccc(cc4)NC(=O)C[C@]156CC[C@@]([C5]C)C(C)C(=O)C6)C |
| ZINC0850099  | 5.25  | -2.92             | -12.11           | 1        | 5           | 0      | 414.701         | 5              | c1ccc(cc1)c2nnc(o2)SCC(=O)Nc3ccc(cc3)C)C)C)C                                                    |
| ZINC08441033 | 5.35  | 14.54             | -16.69           | 2        | 6           | 0      | 554.731         | 6              | C[C@]12C[C@@]([C1]C)C(C2=O)C(=O)Nc3ccc(cc3)Cc4ccc(cc4)NC(=O)C[C@]156CC[C@@]([C5]C)C(C)C(=O)C6)C |
| ZINC08441032 | 4.91  | -0.23             | -13.68           | 0        | 6           | 0      | 472.335         | 6              | CC1=NC2=C([C@@H](C1C(=O)OC)c3ccc(c(c3)COC4=O)C)C(=O)CCC2                                        |
| ZINC08441032 | 4.91  | -0.2              | -15.24           | 0        | 6           | 0      | 472.335         | 6              | CC1=C([C@@H]([C@H]2C(=N1)CCCC2=O)c3ccc(c(c3)COC4=O)C)C(=O)OC                                    |
| ZINC08441032 | 5.09  | -0.11             | -13.27           | 0        | 6           | 0      | 472.335         | 6              | COC(=O)C1[C@@H]([C@@H]2C(=NC1=O)CCCC2=O)c3ccc(c3)COC4ccc(cc4)Br                                 |
| ZINC08441032 | 5.09  | 1.06              | -14.41           | 0        | 6           | 0      | 472.335         | 6              | COC(=O)C1[C@@H]([C@H]2C(=NC1=O)CCCC2=O)c3ccc(c3)COC4ccc(cc4)Br                                  |
| ZINC08441031 | 6.72  | 4.33              | -12.87           | 0        | 4           | 0      | 450.563         | 7              | Cc1ccc(c1)OC(=O)CSc2c(c(cc2)C)C3CCCC3)c4ccc(c4)C#N)C                                            |
| ZINC08441030 | 7.7   | 18.09             | -14.03           | 0        | 4           | 0      | 497.623         | 7              | c1ccc(cc1)c2cc(nc(c2C#N)SCC(=O)N)c3ccc(cc3)c4ccc(c4)C5CCCC5                                     |
| ZINC02063567 | 5.74  | 15.08             | -14.38           | 1        | 4           | 0      | 443.93          | 7              | CC(=O)Oe1ccc2ccc2e1[C@@H]([C3ccc(cc3)C]N)C(=O)C4ccc4                                            |
| ZINC01899816 | 5.11  | 11.19             | -13.11           | 1        | 5           | 0      | 480.193         | 5              | c1ccc(cc1)C2=NC3nc(n3)C[C@@H]([C2]c4ccc(cc4)C)CCCO)Br                                           |
| ZINC01899816 | 5.11  | 11.66             | -32.79           | 2        | 5           | 1      | 481.201         | 5              | c1ccc(cc1)C2=NC3[nH+][c]nn3[C@@H]([C2]c4ccc(cc4)C)CCCO)Br                                       |
| ZINC02063566 | 5.74  | 15.09             | -13.96           | 1        | 4           | 0      | 443.93          | 7              | CC(=O)Oe1ccc2ccc2e1[C@@H]([C3ccc(cc3)C]N)C(=O)C4ccc4                                            |
| ZINC08441029 | 5.94  | 0.49              | -12.79           | 0        | 6           | 0      | 514.416         | 7              | CCOC(=O)C1[C@@H]([C2=C(C(C(C2=O)C)C)N=C1]C)C3ccc(c3)COC4ccc(cc4)Br                              |
| ZINC08441029 | 5.94  | 0.34              | -14.11           | 0        | 6           | 0      | 514.416         | 7              | CCOC(=O)C1=C(N=C2CC(C(C2=O)C)C)N=C1]C)C3ccc(c3)COC4ccc(cc4)Br)C)C)C                             |
| ZINC08441029 | 6.12  | -0.75             | -12.05           | 0        | 6           | 0      | 514.416         | 7              | CCOC(=O)C1[C@@H]([C2(=NC1=O)C]C(C2=O)C)C3ccc(c3)COC4ccc(cc4)Br                                  |
| ZINC01899820 | 5.11  | 11.67             | -13.27           | 1        | 5           | 0      | 480.193         | 5              | c1ccc(cc1)C2=NC3nc(n3)C[C@@H]([C2]c4ccc(cc4)C)CCCO)Br                                           |
| ZINC01899820 | 5.11  | 12.14             | -33.36           | 2        | 5           | 1      | 481.201         | 5              | c1ccc(cc1)C2=NC3[nH+][c]nn3[C@@H]([C2]c4ccc(cc4)C)CCCO)Br                                       |
| ZINC08441028 | 5.56  | 0.81              | -21.77           | 1        | 7           | 0      | 512.653         | 10             | CCOC(=O)c1c2c(sc1N)C3CCCC3O(C(=O)O)N=C(C)C4CCCC4)CCCC2                                          |
| ZINC08441027 | 4.26  | -0.53             | -40.7            | 2        | 4           | 1      | 450.422         | 4              | CC(=O)Nc1c(c2c(s1)CCCC2)[C@@H]([C3ccc(c3)Br])N)H+4CCOCC4                                        |
| ZINC08441026 | 4.26  | -0.51             | -40.87           | 2        | 4           | 1      | 450.422         | 4              | CC(=O)Nc1c(c2c(s1)CCCC2)[C@@H]([C3ccc(c3)Br])N)H+4CCOCC4                                        |
| ZINC08441025 | 5.94  | 0.65              | -9.66            | 0        | 6           | 0      | 514.416         | 7              | CCOC(=O)C1[C@@H]([C2=C(C(C(C2=O)C)C)N=C1]C)C3ccc(c3)COC4ccc(cc4)Br                              |
| ZINC08441025 | 5.94  | 0.85              | -13.45           | 0        | 6           | 0      | 514.416         | 7              | CCOC(=O)C1=C(N=C2CC(C(C2=O)C)C)N=C1]C)C3ccc(c3)COC4ccc(cc4)Br)C)C)C                             |
| ZINC08441025 | 6.12  | -0.31             | -11.29           | 0        | 6           | 0      | 514.416         | 7              | CCOC(=O)C1[C@@H]([C2(=NC1=O)C]C(C2=O)C)C3ccc(c3)COC4ccc(cc4)Br                                  |
| ZINC08441024 | 5.52  | 0.08              | -8.54            | 1        | 4           | 0      | 421.257         | 7              | CCCCCC1=NN([C@@]([C1](C(F)F)F)O)C(=O)c2ccc(cc2)Br                                               |
| ZINC08441023 | 4.37  | 2.41              | -44.27           | 2        | 4           | 1      | 439.523         | 5              | CC(=O)Nc1c(c2c(s1)CCCC2)[C@@H]([C3ccc(cc3)C(F)F)F])N)H+4CCOCC4                                  |

Supplementary Table S2:

Detailed table of XP Docking using Schrodinger's Glide module

| ZINC_ID      | sLogP | ApolarDesolvation | PolarDesolvation | H Donors | H Acceptors | Charge | MolecularWeight | RotatableBonds | SMILES                                                                                   |
|--------------|-------|-------------------|------------------|----------|-------------|--------|-----------------|----------------|------------------------------------------------------------------------------------------|
| ZINC08441022 | 5.52  | 0.09              | -8.44            | 1        | 4           | 0      | 421.257         | 7              | CCCCCCC1=NN([C@@H]([C1](F)(F)F)O)C(=O)c2ccc(cc2)Br                                       |
| ZINC08441021 | 4.08  | 1.25              | -41.64           | 2        | 5           | 1      | 437.532         | 6              | CC(=O)Nc1c(c2c(s1)CCCC2)[C@@H](c3ccc(cc3)OC(F)F)NH+14CCOCC4                              |
| ZINC02063547 | 8.93  | 1.29              | -11.72           | 1        | 4           | 0      | 486.681         | 7              | CCOc1ccc2c(c1)sc(n2)c3ccc(cc3)NC(=O)c4cc(cc(c4)C(C)C)C(C)C                               |
| ZINC08441020 | 6.12  | 0.59              | -9.93            | 0        | 6           | 0      | 481.976         | 8              | CCOC(=O)C1[C@@H](C2=C(CCC2=O)N=C1C)c3ccc(c(c3)CO4ccc(cc4)C)OC                            |
| ZINC08441020 | 6.3   | -0.6              | -10.62           | 0        | 6           | 0      | 481.976         | 8              | CCOC(=O)C1[C@@H](C2C(=NC1=C)CCC2=O)c3ccc(c(c3)CO4ccc(cc4)C)OC                            |
| ZINC08441019 | 3.8   | -2.81             | -23.29           | 1        | 7           | 0      | 421.43          | 4              | CC(=O)Nc1ccc(cc1)OS(=O)(=O)c2ccc3c2C(=O)c4ccc4C3=O                                       |
| ZINC08441018 | 4.08  | 1.32              | -41.47           | 2        | 5           | 1      | 437.532         | 6              | CC(=O)Nc1c(c2c(s1)CCCC2)[C@@H](c3ccc(cc3)OC(F)F)NH+14CCOCC4                              |
| ZINC06446915 | 7.96  | 14.75             | -12.56           | 2        | 4           | 0      | 438.666         | 13             | c1ccc2c(c1)nH(c(n2)SCCCCCCCCCSc3nH)c4ccc4n3                                              |
| ZINC02355111 | 7.63  | 3.88              | -11.77           | 0        | 6           | 0      | 511.647         | 7              | CC1=C([C@@H](n2c(=O)/c=C/c3cn(c4c3ccc4)CC=C)/sc2=N1)c5ccc(cc5)C(C)C(C)C(=O)OC            |
| ZINC08441017 | 4.61  | 0.78              | -36.95           | 2        | 5           | 1      | 476.416         | 5              | Cc1c(sfc1[C@@H](c2ccc(c2)Br)NH+13CCOCC3)NC(=O)c4ccc4C                                    |
| ZINC0970906  | 7.14  | 1.86              | -11.58           | 1        | 6           | 0      | 485.609         | 5              | Cc1c(c2ccc(c2)nH)1/C=c\3/c(=O)n4c(=NC=C([C@@H]4c5ccc(cc5)C(C)C)C(=O)OC)C)s3              |
| ZINC0970908  | 7.14  | 1.94              | -11.73           | 1        | 6           | 0      | 485.609         | 5              | Cc1c(c2ccc(c2)nH)1/C=c\3/c(=O)n4c(=NC=C([C@@H]4c5ccc(cc5)C(C)C)C(=O)OC)C)s3              |
| ZINC08441016 | 4.31  | 11.34             | -54.32           | 0        | 6           | -1     | 450.584         | 5              | CCOc1ccc(c1)N2C(=O)/C=C/c3cc(n(c3C)C4CCCC4)C/C(=NC2=S)[O-]                               |
| ZINC0859938  | 3.79  | 12.13             | -54.12           | 0        | 7           | -1     | 487.605         | 6              | CCOC1ccc(c1)N2C(=O)/C=C/c3cc(n(c3C)4ccc(cc4)N(C)C)C/C(=NC2=S)[O-]                        |
| ZINC08441015 | 6.12  | 0.77              | -10.15           | 0        | 6           | 0      | 481.976         | 8              | CCOC(=O)C1[C@@H](C2=C(CCC2=O)N=C1C)c3ccc(c(c3)CO4ccc(cc4)C)OC                            |
| ZINC08441015 | 6.12  | 0.48              | -13.69           | 0        | 6           | 0      | 481.976         | 8              | CCOC(=O)C1=C(N=C2CCC(=O)C2[C@@H]1c3ccc(c(c3)CO4ccc(cc4)C)OC)C                            |
| ZINC08441015 | 6.3   | -0.43             | -10.96           | 0        | 6           | 0      | 481.976         | 8              | CCOC(=O)C1[C@@H](C2C(=NC1=C)CCC2=O)c3ccc(c(c3)CO4ccc(cc4)C)OC                            |
| ZINC08441014 | 4.61  | 0.81              | -37.08           | 2        | 5           | 1      | 476.416         | 5              | Cc1c(sfc1[C@@H](c2ccc(c2)Br)NH+13CCOCC3)NC(=O)c4ccc4C                                    |
| ZINC08441013 | 4.72  | 12.92             | -53.37           | 0        | 6           | -1     | 472.59          | 5              | CCOc1ccc(c1)N2C(=O)/C=C/c3cc(n(c3C)4ccc(cc4)C)C/C(=NC2=S)[O-]                            |
| ZINC0852798  | 3.07  | 0.54              | -9.52            | 1        | 6           | 0      | 464.319         | 3              | Cc1cc(c(n1c2ccc(c2)C)/C=C\3/C(=O)NC(=O)N(C)3=O)c4ccc(cc4)Br                              |
| ZINC08441012 | 4.48  | 1.39              | -36.95           | 2        | 5           | 1      | 431.965         | 5              | Cc1c(sfc1[C@@H](c2ccc(c2)C)NH+13CCOCC3)NC(=O)c4ccc4C                                     |
| ZINC0970877  | 3.89  | -3.42             | -10.21           | 2        | 5           | 0      | 496.18          | 2              | Cc1c(ccc1N2C(=O)/C=C/c3ccc(c(c3)Br)O)/C(=O)NC2=S                                         |
| ZINC08441011 | 3.41  | -5.97             | -10.72           | 3        | 6           | 0      | 498.152         | 2              | Cc1c(ccc1Br)N2C(=O)/C=C/c3ccc(c(c3)O)Br)/C(=O)NC2=S                                      |
| ZINC08441010 | 4.48  | 1.42              | -37.05           | 2        | 5           | 1      | 431.965         | 5              | Cc1c(sfc1[C@@H](c2ccc(c2)C)NH+13CCOCC3)NC(=O)c4ccc4C                                     |
| ZINC08441009 | 7.8   | 2.84              | -17.88           | 0        | 7           | 0      | 632.811         | 5              | Cc1cc(c(n1c2c(c3c(s2)CCCC3)C#N)C)/C=c\4/c(=O)n5c(=NC=C([C@@H]5c6c7ccc7ccc6OC)C(=O)C)C)s4 |
| ZINC08441008 | 7.8   | 2.71              | -17.81           | 0        | 7           | 0      | 632.811         | 5              | Cc1cc(c(n1c2c(c3c(s2)CCCC3)C#N)C)/C=c\4/c(=O)n5c(=NC=C([C@@H]5c6c7ccc7ccc6OC)C(=O)C)C)s4 |
| ZINC0970872  | 6.48  | 0.88              | -17.36           | 1        | 6           | 0      | 507.615         | 4              | Cc1c(c2ccc(c2)nH)1/C=c\3/c(=O)n4c(=NC=C([C@@H]4c5ccc(cc5)OC)C(=O)C)C)s3                  |
| ZINC0970874  | 6.48  | 0.92              | -17.28           | 1        | 6           | 0      | 507.615         | 4              | Cc1c(c2ccc(c2)nH)1/C=c\3/c(=O)n4c(=NC=C([C@@H]4c5ccc(cc5)OC)C(=O)C)C)s3                  |
| ZINC08441007 | 6.4   | 1.33              | -9.68            | 0        | 6           | 0      | 496.003         | 7              | CC1=NC2=C([C@@H](C1C(=O)OC)c3ccc(c(c3)CO4ccc(cc4)C)OC)C(=O)CC(C2)C(C)C                   |
| ZINC08441007 | 6.58  | 2.77              | -17.73           | 0        | 6           | 0      | 496.003         | 7              | CC1(C2=NC=C(C)C([C@@H](C2C(=O)C)C)C)C3ccc(c(c3)CO4ccc(cc4)C)OC(C(=O)OC)C                 |
| ZINC08441007 | 6.58  | 1.47              | -10.43           | 0        | 6           | 0      | 496.003         | 7              | CC1(C2=NC=C(C)C([C@@H](C2C(=O)C)C)C)C3ccc(c(c3)CO4ccc(cc4)C)OC(C(=O)OC)C                 |
| ZINC08441007 | 6.4   | 1.35              | -12.53           | 0        | 6           | 0      | 496.003         | 7              | CC1=C([C@@H]([C@@H]2C(=N1)CC2=O)C)C3ccc(c(c3)CO4ccc(cc4)C)OC(C(=O)OC)C                   |
| ZINC08441005 | 5.26  | -1.23             | -6.8             | 1        | 4           | 0      | 504.62          | 2              | Cc1c(ccc1N2C(=O)/C=C/c3ccc(c(c3)C)C)C1/C(=O)NC2=S                                        |
| ZINC08441004 | 6.5   | -1.14             | -11.49           | 1        | 6           | 0      | 697.776         | 6              | Cc1c(ccc1N2C(=O)/C=C/c3ccc(c(c3)OC4ccc(cc4)C)OC)C/C(=O)NC2=S                             |
| ZINC08441002 | 4.5   | -4.84             | -8.95            | 2        | 5           | 0      | 608.049         | 2              | Cc1c(ccc1Br)N2C(=O)/C=C/c3ccc(c(c3)O)Br)/C(=O)NC2=S                                      |
| ZINC08441000 | 4.5   | 1.36              | -38.13           | 2        | 5           | 1      | 431.965         | 5              | Cc1c(sfc1[C@@H](c2ccc(cc2)C)NH+13CCOCC3)NC(=O)c4ccc4C                                    |
| ZINC0852837  | 4.69  | 7.38              | -90.53           | 0        | 5           | -2     | 559.033         | 2              | Cc1c(ccc1Br)N2C(=O)/C=C/c3ccc(c(c3)Br)O)Br)/C(=NC2=S)[O-]                                |
| ZINC0852837  | 4.69  | 6.6               | -40.57           | 1        | 5           | -1     | 560.041         | 2              | Cc1c(ccc1Br)N2C(=O)/C=C/c3ccc(c(c3)Br)O)Br)/C(=NC2=S)[O-]                                |
| ZINC02063498 | 6.13  | 0.21              | -13.26           | 0        | 6           | 0      | 436.198         | 5              | c1ccc(cc1C(F)(F)F)N+=[O+]O)S2zmet(2)c3ccc(cc3)Cl                                         |
| ZINC08440999 | 4.5   | 1.35              | -38.26           | 2        | 5           | 1      | 431.965         | 5              | Cc1c(sfc1[C@@H](c2ccc(cc2)C)NH+13CCOCC3)NC(=O)c4ccc4C                                    |
| ZINC08440998 | 6.4   | 1.31              | -9.72            | 0        | 6           | 0      | 496.003         | 7              | CC1=NC2=C([C@@H](C1C(=O)OC)c3ccc(c(c3)CO4ccc(cc4)C)OC)C(=O)CC(C2)C(C)C                   |
| ZINC08440998 | 6.58  | 1.36              | -10.22           | 0        | 6           | 0      | 496.003         | 7              | CC1(C2=NC=C(C)C([C@@H](C2C(=O)C)C)C)C3ccc(c(c3)CO4ccc(cc4)C)OC(C(=O)OC)C                 |
| ZINC08440998 | 6.4   | 1.26              | -12.66           | 0        | 6           | 0      | 496.003         | 7              | CC1=C([C@@H]([C@@H]2C(=N1)CC2=O)C)C3ccc(c(c3)CO4ccc(cc4)C)OC(C(=O)OC)C                   |
| ZINC08440998 | 6.58  | 2.53              | -12.23           | 0        | 6           | 0      | 496.003         | 7              | CC1(C2=NC=C(C)C([C@@H](C2C(=O)C)C)C)C3ccc(c(c3)CO4ccc(cc4)C)OC(C(=O)OC)C                 |
| ZINC02063496 | 5.79  | 1.26              | -26.05           | 2        | 5           | 1      | 482.398         | 7              | CCOC(=O)C[NH+][C@@H](c2ccc(cc2)N)C@H]1c3ccc(c3OC)Br)4ccc4                                |
| ZINC08440997 | 5.79  | 0.9               | -30.75           | 2        | 5           | 1      | 482.398         | 7              | CCOC(=O)C[NH+][C@@H](c2ccc(cc2)N)C@H]1c3ccc(c3OC)Br)4ccc4                                |
| ZINC08440996 | 5.86  | -0.54             | -12.65           | 1        | 6           | 0      | 585.296         | 7              | COc1ccc(c1N)C(=O)CC(=O)N2C@H]([C@@H](CC(=N2)c3ccc(cc3)Br)4ccc(cc4)Br                     |
| ZINC08440995 | 5.86  | -0.58             | -12.49           | 1        | 6           | 0      | 585.296         | 7              | COc1ccc(c1N)C(=O)CC(=O)N2C@H]([C@@H](CC(=N2)c3ccc(cc3)Br)4ccc(cc4)Br                     |
| ZINC08440994 | 4.44  | 2.52              | -38.76           | 2        | 6           | 1      | 463.526         | 7              | Cc1c(sfc1[C@@H](c2ccc(cc2)OC(F)F)NH+13CCOCC3)NC(=O)c4ccc4C                               |
| ZINC08440992 | 6.44  | 0.85              | -14.86           | 0        | 6           | 0      | 574.519         | 7              | CCOC(=O)C1[C@@H](C2=C(C(C2=O)C)C)N=C1C)c3cn(nc3c4ccc4)Cc5ccc(cc5)Br                      |
| ZINC08440992 | 6.62  | -0.01             | -14.34           | 0        | 6           | 0      | 574.519         | 7              | CCOC(=O)C1[C@@H](C2C(=NC1=C)CC(C2=O)C)C)c3cn(nc3c4ccc4)Cc5ccc(cc5)Br                     |
| ZINC08440992 | 6.44  | 1.07              | -16.79           | 0        | 6           | 0      | 574.519         | 7              | CCOC(=O)C1=C(N=C2CC(C(C(=O)C2)[C@@H]1c3cn(nc3c4ccc4)Cc5ccc(cc5)Br)C)C                    |
| ZINC08440990 | 3.43  | -0.39             | -98.7            | 3        | 7           | 2      | 475.618         | 6              | Cc1c(sfc1[C@@H](c2ccc(c2)C)NH+13CCN(C3)c4ccc(nH+4)NC(=O)c5ccc5O5                         |
| ZINC08440987 | 3.43  | -0.45             | -96.78           | 3        | 7           | 2      | 475.618         | 6              | Cc1c(sfc1[C@@H](c2ccc(c2)C)NH+13CCN(C3)c4ccc(nH+4)NC(=O)c5ccc5O5                         |
| ZINC08440986 | 6.44  | 0.94              | -11.19           | 0        | 6           | 0      | 574.519         | 7              | CCOC(=O)C1[C@@H](C2=C(C(C2=O)C)C)N=C1C)c3cn(nc3c4ccc4)Cc5ccc(cc5)Br                      |
| ZINC08440986 | 6.62  | 0.05              | -13.13           | 0        | 6           | 0      | 574.519         | 7              | CCOC(=O)C1[C@@H](C2C(=NC1=C)CC(C2=O)C)C)c3cn(nc3c4ccc4)Cc5ccc(cc5)Br                     |
| ZINC04182261 | 6.54  | -3.3              | -14.37           | 0        | 4           | 0      | 534.273         | 4              | Cc1ccc(c1)S(=O)(=O)N2[C@@H](CC(=N2)c3ccc(cc3)Br)4ccc(cc4)Br                              |
| ZINC04182260 | 6.54  | -3.69             | -11.84           | 0        | 4           | 0      | 534.273         | 4              | Cc1ccc(c1)S(=O)(=O)N2[C@@H](CC(=N2)c3ccc(cc3)Br)4ccc(cc4)Br                              |
| ZINC08440985 | 6.84  | 0.49              | -11.41           | 0        | 3           | 0      | 518.636         | 3              | c1ccc(c1)C(=O)N2[C@@H](CC(=N2)c3ccc(cc3)Br)4ccc(cc4)Br)C                                 |
| ZINC08440984 | 6.84  | 0.49              | -11.43           | 0        | 3           | 0      | 518.636         | 3              | c1ccc(c1)C(=O)N2[C@@H](CC(=N2)c3ccc(cc3)Br)4ccc(cc4)Br)C                                 |

Supplementary Table S2:

Detailed table of XP Docking using Schrodinger's Glide module

| ZINC_ID      | xLogP | ApolarDesolvation | PolarDesolvation | H Donors | H Acceptors | Charge | MolecularWeight | RotatableBonds | SMILES                                                                        |
|--------------|-------|-------------------|------------------|----------|-------------|--------|-----------------|----------------|-------------------------------------------------------------------------------|
| ZINC02063489 | 8.37  | 0.13              | -8.01            | 1        | 4           | 0      | 514.81          | 5              | c1ccc(cc1)c2c3ccc(ccc3nc(n2)Nc4cccc(cc4C(=O)e5cccc5)C)Br                      |
| ZINC02063488 | 7.71  | 0.39              | -9.81            | 1        | 4           | 0      | 480.365         | 5              | c1ccc(cc1)c2c3ccc(ccc3nc(n2)Nc4cccc4C(=O)e5cccc5)Br                           |
| ZINC01927667 | 7.25  | 1.79              | -15.84           | 1        | 5           | 0      | 586.06          | 7              | Cc1c(c2c(s1)nc(n(c2=O)c3cccc3)SCC(=O)Nc4ccc(ccc4C)C(F)F)F)c5cccc5             |
| ZINC08440983 | 6.77  | 1.57              | -9.55            | 0        | 6           | 0      | 510.03          | 8              | CCOC(=O)C1[C@@H](C2=C(C(C2=O)[C]N=C1C)c3ccc(c(c3)C0c4cccc(cc4)C)OC            |
| ZINC08440983 | 6.96  | 0.63              | -10.58           | 0        | 6           | 0      | 510.03          | 8              | CCOC(=O)C1[C@@H](C2=C(C(C2=O)[C]N=C1C)c3ccc(c(c3)C0c4cccc(cc4)C)OC            |
| ZINC08440983 | 6.77  | 1.55              | -12.58           | 0        | 6           | 0      | 510.03          | 8              | CCOC(=O)C1=C(N=C2CC(C(C2=O)C2)[C@H]1c3ccc(c(c3)C0c4cccc(cc4)C)OC)(C)C         |
| ZINC02063487 | 7.78  | 1.68              | -11.56           | 1        | 4           | 0      | 429.523         | 5              | Cc1ccc2c(c1)c(nc(n2)Nc3ccc(cc3C(=O)e4cccc4)C)c5cccc5                          |
| ZINC08440982 | 7.81  | 4.65              | -16.37           | 0        | 5           | 0      | 629.729         | 8              | Cc1ccc(cfn1c2cccc(c2)C(F)F)F)C(C)C(=O)C5c3n4c(c(c(s4)C)c5cccc5)c(=O)n3c6cccc6 |
| ZINC08440981 | 5.77  | -0.09             | -13.18           | 1        | 6           | 0      | 540.845         | 7              | C0c1ccc(cc1)[C@H]2CC(=NN2C(=O)CCC(=O)Nc3ccc(cc3)C)c4ccc(cc4)Br                |
| ZINC08440980 | 5.77  | -0.1              | -13.15           | 1        | 6           | 0      | 540.845         | 7              | C0c1ccc(cc1)[C@H]2CC(=NN2C(=O)CCC(=O)Nc3ccc(cc3)C)c4ccc(cc4)Br                |
| ZINC08440979 | 6.77  | 1.59              | -9.61            | 0        | 6           | 0      | 510.03          | 8              | CCOC(=O)C1[C@@H](C2=C(C(C2=O)[C]N=C1C)c3ccc(c(c3)C0c4cccc(cc4)C)OC            |
| ZINC08440979 | 6.96  | 0.32              | -10.42           | 0        | 6           | 0      | 510.03          | 8              | CCOC(=O)C1[C@@H](C2=C(NC1)C)CC(C2=O)[C]C)c3ccc(c(c3)C0c4cccc(cc4)C)OC         |
| ZINC08440979 | 6.77  | 1.22              | -12.63           | 0        | 6           | 0      | 510.03          | 8              | CCOC(=O)C1=C(N=C2CC(C(C2=O)C2)[C@H]1c3ccc(c(c3)C0c4cccc(cc4)C)OC)(C)C         |
| ZINC01927657 | 6.62  | 1.74              | -16.26           | 1        | 5           | 0      | 551.615         | 7              | Cc1c(c2c(s1)nc(n(c2=O)c3cccc3)SCC(=O)Nc4ccc(cc4)C(F)F)c5cccc5                 |
| ZINC06294383 | 6.37  | 15.65             | -14.23           | 0        | 6           | 0      | 471.601         | 10             | CCc1cccc(c1N(COCC)C(=O)Cn2c3cccc3nc2C0c4cccc4)C)C                             |
| ZINC08440978 | 6.97  | -0.06             | -11.02           | 0        | 3           | 0      | 563.087         | 3              | c1ccc(c(c1)C(=O)N2[C@@H](CC(=N2)c3ccc(cc3)Br)c4ccc(cc4)Br)Br                  |
| ZINC08440977 | 6.97  | -0.06             | -10.94           | 0        | 3           | 0      | 563.087         | 3              | c1ccc(c(c1)C(=O)N2[C@@H](CC(=N2)c3ccc(cc3)Br)c4ccc(cc4)Br)Br                  |
| ZINC08440976 | 3.79  | -1.48             | -16.35           | 2        | 7           | 0      | 531.764         | 7              | c1ccc(ccc1[C@@H]2C[C@H](n3c(c(c(n3)C(=O)NCCn4cnc4)C)N2)C(F)F)Br               |
| ZINC08440976 | 3.79  | -1.2              | -42.66           | 3        | 7           | 1      | 532.772         | 7              | c1ccc(ccc1[C@@H]2C[C@H](n3c(c(c(n3)C(=O)NCCn4cnc4)C)N2)C(F)F)Br               |
| ZINC08440975 | 3.5   | -1.19             | -17.75           | 3        | 10          | 0      | 558.616         | 8              | CCOC(=O)c1c2c(sc1NC(=O)c3ccc(cc3)N)/C=C/3/C(=O)N(C4=O)N(C4=O)c5cccc5)CCCC2    |
| ZINC0970849  | 4.95  | 11.22             | -38.51           | 0        | 6           | -1     | 600.728         | 3              | Cc1c(c(n1)c2c(cc(c2)C)C)O-)/C=C/3/C(=O)N(C3=O)c4cccc4)C                       |
| ZINC08440974 | 3.55  | 4.25              | -55.73           | 1        | 11          | -1     | 619.421         | 8              | CC(=O)N(C(=O)/C1=C(Nc2ccc(cc2)S(=O)(=O)N-c3cc(nf(n3)OC)OC)c4cccc(cc4)N        |
| ZINC08440974 | 3.73  | 5.38              | -22.79           | 2        | 11          | 0      | 620.429         | 7              | CC(=O)N(C(=O)/C1=C(Nc2ccc(cc2)S(=O)(=O)N-c3cc(nf(n3)OC)OC)c4cccc(cc4)N        |
| ZINC08440973 | 3.79  | -1.82             | -18.26           | 2        | 7           | 0      | 531.764         | 7              | c1ccc(ccc1[C@@H]2C[C@H](n3c(c(c(n3)C(=O)NCCn4cnc4)C)N2)C(F)F)Br               |
| ZINC08440973 | 3.79  | -1.54             | -43.12           | 3        | 7           | 1      | 532.772         | 7              | c1ccc(ccc1[C@@H]2C[C@H](n3c(c(c(n3)C(=O)NCCn4cnc4)C)N2)C(F)F)Br               |
| ZINC08440972 | 5.67  | 1.92              | -73.55           | 1        | 5           | 1      | 444.99          | 4              | CC(C)c1cc(n2c3cccc3nc2c1C#N)N4C(NH+)(CC4)C5ccc(cc5)Cl                         |
| ZINC08440969 | 5.4   | 0.93              | -6.51            | 0        | 5           | 0      | 455.292         | 7              | CCOC(=O)C1[C@@H](C(=O)N(C1)C)C(=O)OCC)c2ccc(c2)I                              |
| ZINC08440969 | 5.4   | 0.78              | -7.61            | 0        | 5           | 0      | 455.292         | 7              | CCOC(=O)C1[C@@H](C(=O)N(C1)C)C(=O)OCC)c2ccc(c2)I                              |
| ZINC08440969 | 5.58  | -0.18             | -6.75            | 0        | 5           | 0      | 455.292         | 7              | CCOC(=O)C1[C@@H](C(=O)N(C1)C)C(=O)OCC)c2ccc(c2)I                              |
| ZINC08440968 | 3.79  | -1.87             | -17.48           | 2        | 7           | 0      | 531.764         | 7              | c1ccc(ccc1[C@@H]2C[C@H](n3c(c(c(n3)C(=O)NCCn4cnc4)C)N2)C(F)F)Br               |
| ZINC08440968 | 3.79  | -1.59             | -42.33           | 3        | 7           | 1      | 532.772         | 7              | c1ccc(ccc1[C@@H]2C[C@H](n3c(c(c(n3)C(=O)NCCn4cnc4)C)N2)C(F)F)Br               |
| ZINC08440967 | 4.84  | -1.47             | -51.22           | 1        | 7           | 1      | 484.411         | 7              | c1ccc(ccc1Cn2c3c(cn2)c(n3)N4C(NH+)(CC4)CCO5ccc(cc5)Cl)Cl                      |
| ZINC08440966 | 4.54  | 2.63              | -12.02           | 2        | 13          | 0      | 394.307         | 6              | c1ccc(c(c1)Nc2c(nc3(n2)non3)Nc4cccc4[N+](=O)[O-])[N+](=O)[O-]                 |
| ZINC08440965 | 4.55  | -1.31             | -52.07           | 1        | 6           | 1      | 454.385         | 5              | c1ccc(ccc1Cn2c3c(cn2)c(n3)N4C(NH+)(CC4)C5ccc(cc5)Cl)Cl                        |
| ZINC08440964 | 3.79  | -1.42             | -16.61           | 2        | 7           | 0      | 531.764         | 7              | c1ccc(ccc1[C@@H]2C[C@H](n3c(c(c(n3)C(=O)NCCn4cnc4)C)N2)C(F)F)Br               |
| ZINC08440964 | 3.79  | -1.14             | -43.1            | 3        | 7           | 1      | 532.772         | 7              | c1ccc(ccc1[C@@H]2C[C@H](n3c(c(c(n3)C(=O)NCCn4cnc4)C)N2)C(F)F)Br               |
| ZINC08440963 | 3.77  | 3.38              | -8.1             | 0        | 19          | 0      | 484.301         | 8              | c1ccc(ccc1Nc2c(nc3c(n2)non3)Nc4cccc4[N+](=O)[O-])[N+](=O)[O-])[N+](=O)[O-]    |
| ZINC08440962 | 5.42  | 0.48              | -43.85           | 1        | 6           | 1      | 475.62          | 6              | Cc1ccc(cc1)Cn2c3c(cn2)c(n3)N4C(NH+)(CC4)C5ccc(cc5)C6cccc6                     |
| ZINC0648070  | 4.66  | -2.39             | -9.68            | 3        | 6           | 0      | 465.351         | 4              | Cc1ccc(cc1)C0c2ccc(cc2)Br[C@@H]3c4c(nH)40C(=C3C#N)N)C)C                       |
| ZINC08440958 | 7.18  | 2.13              | -16.59           | 1        | 4           | 0      | 362.521         | 10             | CCCCCCCNC1c(c2n1c3cccc3n2)C#N)CCC                                             |
| ZINC0648073  | 4.66  | -2.4              | -9.58            | 3        | 6           | 0      | 465.351         | 4              | Cc1ccc(cc1)C0c2ccc(cc2)Br[C@@H]3c4c(nH)40C(=C3C#N)N)C)C                       |
| ZINC06300227 | 3.89  | 7.26              | -12.37           | 3        | 7           | 0      | 430.508         | 5              | Cc1ccc(cc1)C)C0c2ccc(cc2)C)[C@@H]3c4c(nH)40C(=C3C#N)N)C)C                     |
| ZINC0702815  | 4.45  | 1.2               | -14.92           | 0        | 7           | 0      | 445.5           | 8              | c1ccc(cc1)C(=O)CSc2nnc(n2c3cccc3)C0c4ccc5c(c4)OC05                            |
| ZINC06300225 | 3.89  | 7.19              | -12.32           | 3        | 7           | 0      | 430.508         | 5              | Cc1ccc(cc1)C)C0c2ccc(cc2)C)[C@@H]3c4c(nH)40C(=C3C#N)N)C)C                     |
| ZINC0702814  | 5.12  | 1.03              | -15.08           | 0        | 7           | 0      | 479.945         | 8              | c1ccc(cc1)n2c(nnc2SCC(=O)c3ccc(cc3)C)C0c4ccc5c(c4)OC05                        |
| ZINC00846261 | 4.59  | 8.94              | -17.91           | 4        | 8           | 0      | 523.589         | 9              | Cc1ccc(cc1)N(C(=O)[C@H](Cc2ccc(cc2)O)N(C(=O)c3cccc3N(C(=O)c4ccc(cc4)OC        |
| ZINC03190354 | 4.59  | -2.76             | -17.9            | 4        | 8           | 0      | 523.589         | 9              | Cc1ccc(cc1)N(C(=O)[C@H](Cc2ccc(cc2)O)N(C(=O)c3cccc3N(C(=O)c4ccc(cc4)OC        |
| ZINC04391415 | 5.88  | 0.51              | -10.84           | 0        | 6           | 0      | 522.432         | 6              | CC(=O)N(C(=O)[C@@H](C1=C(O)OC)c3cn(nc3c4cccc4)C5ccc(cc5)C)C(=O)CCC2           |
| ZINC04391415 | 6.07  | 0.64              | -11.63           | 0        | 6           | 0      | 522.432         | 6              | CCOC(=O)C1[C@@H](C2=C(NC1)C)CC(C2=O)c3cn(nc3c4cccc4)C5ccc(cc5)C)C             |
| ZINC04391415 | 6.07  | 1.92              | -12.65           | 0        | 6           | 0      | 522.432         | 6              | CCOC(=O)C1[C@@H](C2=C(NC1)C)CC(C2=O)c3cn(nc3c4cccc4)C5ccc(cc5)C)C             |
| ZINC08440954 | 3.28  | 11                | -17.84           | 0        | 7           | 0      | 443.503         | 5              | C0c1cccc1N2CCN(C2)C(=O)CCN3C(=O)c4cccc5c4ccc5)C3=O                            |
| ZINC08440953 | 5.4   | -3.48             | -16.05           | 4        | 8           | 0      | 531.653         | 14             | CCCCCCCNC(=O)[C@@H](Cc1ccc(cc1)O)N(C(=O)c2cccc2N(C(=O)c3ccc(cc3)OC            |
| ZINC08440951 | 5.4   | -3.42             | -16.46           | 4        | 8           | 0      | 531.653         | 14             | CCCCCCCNC(=O)[C@@H](Cc1ccc(cc1)O)N(C(=O)c2cccc2N(C(=O)c3ccc(cc3)OC            |
| ZINC08440950 | 3.87  | -0.98             | -11.56           | 3        | 7           | 0      | 439.556         | 10             | CC(C)[C@H](C)[C@H](C(=O)NCC(C)N)C(=O)c1cccc1N(C(=O)c2ccc(cc2)OC               |
| ZINC08440949 | 3.87  | -0.79             | -11.6            | 3        | 7           | 0      | 439.556         | 10             | CC(C)[C@H](C)[C@H](C(=O)NCC(C)N)C(=O)c1cccc1N(C(=O)c2ccc(cc2)OC               |
| ZINC08440948 | 3.87  | -0.6              | -12.36           | 3        | 7           | 0      | 439.556         | 10             | CC(C)[C@H](C)[C@H](C(=O)NCC(C)N)C(=O)c1cccc1N(C(=O)c2ccc(cc2)OC               |
| ZINC02129169 | 4.67  | 15.15             | -12.73           | 0        | 6           | 0      | 447.589         | 9              | C=Cc1c(=O)c2cccc2n1Sc3c3nnc3c4cccc4)SCC=C                                     |
| ZINC08440946 | 3.87  | -0.96             | -11.55           | 3        | 7           | 0      | 439.556         | 10             | CC(C)[C@H](C)[C@H](C(=O)NCC(C)N)C(=O)c1cccc1N(C(=O)c2ccc(cc2)OC               |
| ZINC08440945 | 3.46  | -3.07             | -18.46           | 4        | 10          | 0      | 532.597         | 11             | Cc1ccc(cc1)OCC(=O)NCC(=O)[C@@H](C)C)N(C(=O)c2cccc2N(C(=O)c3ccc(cc3)OC         |
| ZINC08440944 | 5.88  | 0.56              | -17.95           | 0        | 6           | 0      | 522.432         | 6              | CC1=NC2=C(C)[C@@H](C1C(=O)OC)c3cn(nc3c4cccc4)C5ccc(cc5)C)C(=O)CCC2            |
| ZINC08440944 | 6.07  | 1.93              | -20.38           | 0        | 6           | 0      | 522.432         | 6              | CCOC(=O)C1[C@@H](C2=C(NC1)C)CC(C2=O)c3cn(nc3c4cccc4)C5ccc(cc5)C)C             |









Supplementary Table S2:

Detailed table of XP Docking using Schrodinger's Glide module

| ZINC_ID      | sLogP | ApolarDesolvation | PolarDesolvation | H Donors | H Acceptors | Charge | MolecularWeight | RotatableBonds | SMILES                                                                             |
|--------------|-------|-------------------|------------------|----------|-------------|--------|-----------------|----------------|------------------------------------------------------------------------------------|
| ZINC00970786 | 5.77  | -0.78             | -19.31           | 1        | 7           | 0      | 419.824         | 5              | C1ccc(cc1)[N+](=O)[O-]/C=C/C(=O)Nc2ccc(cc2)c3nc4ccc(ccc4o3)Cl                      |
| ZINC02063408 | 6.66  | -0.88             | -18.43           | 1        | 5           | 0      | 451.32          | 4              | Cc1cc2c(cc1C)oc(n2)c3ccc(c3)NC(=O)c4ccc(ccc4O)Br                                   |
| ZINC08440868 | 6.44  | 2.92              | -11.39           | 1        | 5           | 0      | 513.439         | 4              | [H]/N=C/1/[C@@H](C2=CCCC[C@@H]2)[C@@H](C1(C#N)C#N)c3ccc(cc3C)COC4ccc(cc4)Br]C#N    |
| ZINC08440868 | 6.44  | 2.75              | -33.72           | 2        | 5           | 1      | 514.447         | 4              | Cc1cc(c1C)COC2ccc(cc2)Br][C@@H]3[C@@H]4CCCC=C4[C@@H](C1=NH2+)C3(C#N)C#N]C          |
| ZINC02063407 | 6.66  | -0.77             | -19.9            | 1        | 5           | 0      | 451.32          | 4              | Cc1cc(c2c(c1)nc(o2)c3ccc(c3)NC(=O)c4ccc(ccc4O)Br]C                                 |
| ZINC00702762 | 3.86  | 9.59              | -41.12           | 0        | 6           | -1     | 440.903         | 7              | CCOc1ccc(cc1)C(=O)C2=C(C(=O)N)(C@@H)2c3ccc(c3)Cl]C[C@@H]4CCCCO4[O-]                |
| ZINC00702762 | 4.31  | -1.74             | -30.82           | 1        | 6           | 0      | 441.911         | 6              | CCOc1ccc(cc1)C=C2[C@@H](N(C(=O)C2=O)C[C@@H]3CCCC3)c4ccc(cc4)Cl]O                   |
| ZINC00702762 | 3.28  | -1.45             | -25.3            | 0        | 6           | 0      | 441.911         | 7              | CCOc1ccc(cc1)C(=O)[C@@H]2[C@@H](N(C(=O)C2=O)C[C@@H]3CCCCO3)c4ccc(cc4)Cl            |
| ZINC00850292 | 6.28  | -1.1              | -19.26           | 1        | 5           | 0      | 437.293         | 4              | Cc1ccc2c(c1)oc(n2)c3ccc(c3)NC(=O)c4ccc(ccc4O)Br                                    |
| ZINC00850290 | 6.28  | -1.1              | -18.19           | 1        | 5           | 0      | 437.293         | 4              | Cc1ccc2c(c1)nc(o2)c3ccc(c3)NC(=O)c4ccc(ccc4O)Br                                    |
| ZINC08440867 | 6.44  | 2.25              | -11.11           | 1        | 5           | 0      | 513.439         | 4              | [H]/N=C/1/[C@@H](C2=CCCC[C@@H]2)[C@@H](C1(C#N)C#N)c3ccc(cc3C)COC4ccc(cc4)Br]C#N    |
| ZINC08440867 | 6.44  | 2.08              | -40.63           | 2        | 5           | 1      | 514.447         | 4              | Cc1cc(c1C)COC2ccc(cc2)Br][C@@H]3[C@@H]4CCCC=C4[C@@H](C1=NH2+)C3(C#N)C#N]C          |
| ZINC00850286 | 5.86  | -1.42             | -18.58           | 1        | 5           | 0      | 423.266         | 4              | Cc1ccc(cc1)C(=O)Nc2ccc(c2)c3nc4cccc4o3)Br                                          |
| ZINC08440866 | 5.15  | 2.34              | -7.16            | 2        | 6           | 0      | 498.391         | 5              | CCOC(=O)C1=C2n(c(=O)/c=C/c3ccc(c3)Cl)/s2]C=C([C@@H]1c4ccc(cc4)Cl)C#N]N             |
| ZINC00702749 | 4.57  | 13.1              | -53.3            | 0        | 6           | -1     | 486.519         | 8              | c1ccc(cc1)COC2ccc(cc2)[C@@H]3C(=C(C(=O)N3[C@@H]4CCCCO4)[O-])C(=O)c5ccc(cc5)F       |
| ZINC00702749 | 5.01  | -0.6              | -31.33           | 1        | 6           | 0      | 487.527         | 7              | c1ccc(cc1)COC2ccc(cc2)[C@@H]3C(=C(C(=O)N3[C@@H]4CCCCO4)[O-])C(=O)c5ccc(cc5)F       |
| ZINC00702749 | 3.98  | -0.34             | -29.91           | 0        | 6           | 0      | 487.527         | 8              | c1ccc(cc1)COC2ccc(cc2)[C@@H]3[C@@H](C(=O)C(=O)N3[C@@H]4CCCCO4)C(=O)c5ccc(cc5)F     |
| ZINC08440865 | 6.44  | 2.26              | -11.1            | 1        | 5           | 0      | 513.439         | 4              | [H]/N=C/1/[C@@H](C2=CCCC[C@@H]2)[C@@H](C1(C#N)C#N)c3ccc(cc3C)COC4ccc(cc4)Br]C#N    |
| ZINC08440865 | 6.44  | 2.09              | -40.72           | 2        | 5           | 1      | 514.447         | 4              | Cc1cc(c1C)COC2ccc(cc2)Br][C@@H]3[C@@H]4CCCC=C4[C@@H](C1=NH2+)C3(C#N)C#N]C          |
| ZINC08440864 | 5.15  | 2.36              | -7.14            | 2        | 6           | 0      | 498.391         | 5              | CCOC(=O)C1=C2n(c(=O)/c=C/c3ccc(c3)Cl)/s2]C=C([C@@H]1c4ccc(cc4)Cl)C#N]N             |
| ZINC02063399 | 5.15  | 7.18              | -11.37           | 2        | 5           | 0      | 518.442         | 4              | c1ccc(cc1)C(F)(F)F)/C=C/2/c(=O)n3c(c(C([C@@H](C(=C3N)C#N)c4ccc(cc4)C(F)(F)F)C#N)s2 |
| ZINC02063401 | 5.15  | 7.16              | -11.26           | 2        | 5           | 0      | 518.442         | 4              | c1ccc(cc1)C(F)(F)F)/C=C/2/c(=O)n3c(c(C([C@@H](C(=C3N)C#N)c4ccc(cc4)C(F)(F)F)C#N)s2 |
| ZINC00702750 | 4.57  | 13.32             | -54.22           | 0        | 6           | -1     | 486.519         | 8              | c1ccc(cc1)COC2ccc(cc2)[C@@H]3C(=C(C(=O)N3[C@@H]4CCCCO4)[O-])C(=O)c5ccc(cc5)F       |
| ZINC00702750 | 5.01  | -0.48             | -31.88           | 1        | 6           | 0      | 487.527         | 7              | c1ccc(cc1)COC2ccc(cc2)[C@@H]3C(=C(C(=O)N3[C@@H]4CCCCO4)[O-])C(=O)c5ccc(cc5)F       |
| ZINC00702750 | 3.98  | -0.19             | -23.57           | 0        | 6           | 0      | 487.527         | 8              | c1ccc(cc1)COC2ccc(cc2)[C@@H]3[C@@H](C(=O)C(=O)N3[C@@H]4CCCCO4)C(=O)c5ccc(cc5)F     |
| ZINC08440863 | 6.44  | 2.88              | -11.36           | 1        | 5           | 0      | 513.439         | 4              | [H]/N=C/1/[C@@H](C2=CCCC[C@@H]2)[C@@H](C1(C#N)C#N)c3ccc(cc3C)COC4ccc(cc4)Br]C#N    |
| ZINC08440863 | 6.44  | 2.71              | -33.84           | 2        | 5           | 1      | 514.447         | 4              | Cc1cc(c1C)COC2ccc(cc2)Br][C@@H]3[C@@H]4CCCC=C4[C@@H](C1=NH2+)C3(C#N)C#N]C          |
| ZINC00702751 | 4.57  | 12.98             | -58.4            | 0        | 6           | -1     | 486.519         | 8              | c1ccc(cc1)COC2ccc(cc2)[C@@H]3C(=C(C(=O)N3[C@@H]4CCCCO4)[O-])C(=O)c5ccc(cc5)F       |
| ZINC00702751 | 5.01  | -0.41             | -31.51           | 1        | 6           | 0      | 487.527         | 7              | c1ccc(cc1)COC2ccc(cc2)[C@@H]3C(=C(C(=O)N3[C@@H]4CCCCO4)[O-])C(=O)c5ccc(cc5)F       |
| ZINC00702751 | 3.98  | -0.12             | -23.72           | 0        | 6           | 0      | 487.527         | 8              | c1ccc(cc1)COC2ccc(cc2)[C@@H]3[C@@H](C(=O)C(=O)N3[C@@H]4CCCCO4)C(=O)c5ccc(cc5)F     |
| ZINC00702752 | 4.57  | 12.6              | -57.82           | 0        | 6           | -1     | 486.519         | 8              | c1ccc(cc1)COC2ccc(cc2)[C@@H]3C(=C(C(=O)N3[C@@H]4CCCCO4)[O-])C(=O)c5ccc(cc5)F       |
| ZINC00702752 | 5.01  | -0.62             | -32.13           | 1        | 6           | 0      | 487.527         | 7              | c1ccc(cc1)COC2ccc(cc2)[C@@H]3C(=C(C(=O)N3[C@@H]4CCCCO4)[O-])C(=O)c5ccc(cc5)F       |
| ZINC00702752 | 3.98  | -0.34             | -25.47           | 0        | 6           | 0      | 487.527         | 8              | c1ccc(cc1)COC2ccc(cc2)[C@@H]3[C@@H](C(=O)C(=O)N3[C@@H]4CCCCO4)C(=O)c5ccc(cc5)F     |
| ZINC08440862 | 5.2   | 0.66              | -15.75           | 0        | 5           | 0      | 455.551         | 7              | CCOC(=O)C1[C@@H](C2=C(CCC2=O)N=C1)C3cc(c(s3)C)COC4ccc(cc4)F                        |
| ZINC08440862 | 5.2   | 0.36              | -17.34           | 0        | 5           | 0      | 455.551         | 7              | CCOC(=O)C1=C(N=C2CCCC(=O)C2)[C@@H]1c3ccc(c(s3)C)COC4ccc(cc4)F                      |
| ZINC08440862 | 5.38  | -0.52             | -15.77           | 0        | 5           | 0      | 455.551         | 7              | CCOC(=O)C1[C@@H](C2(C=NC1=C)CCCC2=O)c3cc(c(s3)C)COC4ccc(cc4)F                      |
| ZINC08440861 | 1.01  | 0.98              | -20.41           | 0        | 9           | 0      | 444.484         | 7              | COC1ccc(c1C(=O)N2CCN(C2)C(=O)c3ccc(c(s3)C)OC)OC                                    |
| ZINC00702745 | 4.84  | 12.83             | -45.48           | 0        | 7           | -1     | 512.582         | 10             | CCOc1ccc(cc1)C(=O)C2=C(C(=O)N)(C@@H)2c3ccc(cc3)OC4ccc(cc4)C[C@@H]5CCCCO5[O-]       |
| ZINC00702745 | 5.28  | -1.32             | -32.21           | 1        | 7           | 0      | 513.59          | 9              | CCOc1ccc(cc1)C=C2[C@@H](N(C(=O)C2=O)C[C@@H]3CCCCO3)c4ccc(cc4)OC5ccc(cc5)O          |
| ZINC00702745 | 4.25  | -1.08             | -25.23           | 0        | 7           | 0      | 513.59          | 10             | CCOc1ccc(cc1)C(=O)C[C@@H]2[C@@H](N(C(=O)C2=O)C[C@@H]3CCCCO3)c4ccc(cc4)OC5ccc(cc5)O |
| ZINC08440859 | 7.51  | 1.18              | -13.17           | 0        | 4           | 0      | 499.394         | 4              | Cc1ccc2c(c1)nc3nc2c(=O)/c=C/c4ccc(cc4)OC5c(ccc5)F]F)Cl/s3                          |
| ZINC02063383 | 5.54  | 1.3               | -11.73           | 1        | 4           | 0      | 439.555         | 5              | CC1(C2=C([C@@H](Nc3c2c4ccc(cc3)c5ccc(c5)OC)OC=C)C(=O)C1)C                          |
| ZINC00702746 | 4.84  | 12.78             | -46.28           | 0        | 7           | -1     | 512.582         | 10             | CCOc1ccc(cc1)C(=O)C2=C(C(=O)N)(C@@H)2c3ccc(cc3)OC4ccc(cc4)C[C@@H]5CCCCO5[O-]       |
| ZINC00702746 | 5.28  | -1.17             | -31.87           | 1        | 7           | 0      | 513.59          | 9              | CCOc1ccc(cc1)C=C2[C@@H](N(C(=O)C2=O)C[C@@H]3CCCCO3)c4ccc(cc4)OC5ccc(cc5)O          |
| ZINC00702746 | 4.25  | -0.87             | -24.51           | 0        | 7           | 0      | 513.59          | 10             | CCOc1ccc(cc1)C(=O)C[C@@H]2[C@@H](N(C(=O)C2=O)C[C@@H]3CCCCO3)c4ccc(cc4)OC5ccc(cc5)O |
| ZINC02063384 | 5.54  | 1.27              | -11.7            | 1        | 4           | 0      | 439.555         | 5              | CC1(C2=C([C@@H](Nc3c2c4ccc(cc3)c5ccc(c5)OC)OC=C)C(=O)C1)C                          |
| ZINC08440858 | 5.2   | 0.68              | -11.5            | 0        | 5           | 0      | 455.551         | 7              | CCOC(=O)C1[C@@H](C2=C(CCC2=O)N=C1)C3cc(c(s3)C)COC4ccc(cc4)F                        |
| ZINC08440858 | 5.2   | 0.41              | -15.07           | 0        | 5           | 0      | 455.551         | 7              | CCOC(=O)C1=C(N=C2CCCC(=O)C2)[C@@H]1e3ccc(c(s3)C)COC4ccc(cc4)F                      |
| ZINC08440858 | 5.38  | -0.55             | -12.78           | 0        | 5           | 0      | 455.551         | 7              | CCOC(=O)C1[C@@H](C2(C=NC1=C)CCCC2=O)c3cc(c(s3)C)COC4ccc(cc4)F                      |
| ZINC00702747 | 4.84  | 12.69             | -46.07           | 0        | 7           | -1     | 512.582         | 10             | CCOc1ccc(cc1)C(=O)C2=C(C(=O)N)(C@@H)2c3ccc(cc3)OC4ccc(cc4)C[C@@H]5CCCCO5[O-]       |
| ZINC00702747 | 5.28  | -1.09             | -31.65           | 1        | 7           | 0      | 513.59          | 9              | CCOc1ccc(cc1)C=C2[C@@H](N(C(=O)C2=O)C[C@@H]3CCCCO3)c4ccc(cc4)OC5ccc(cc5)O          |
| ZINC00702747 | 4.25  | -0.87             | -23.05           | 0        | 7           | 0      | 513.59          | 10             | CCOc1ccc(cc1)C(=O)C[C@@H]2[C@@H](N(C(=O)C2=O)C[C@@H]3CCCCO3)c4ccc(cc4)OC5ccc(cc5)O |
| ZINC00702748 | 4.84  | 12.36             | -45.54           | 0        | 7           | -1     | 512.582         | 10             | CCOc1ccc(cc1)C(=O)C2=C(C(=O)N)(C@@H)2c3ccc(cc3)OC4ccc(cc4)C[C@@H]5CCCCO5[O-]       |
| ZINC00702748 | 5.28  | -1.3              | -32.28           | 1        | 7           | 0      | 513.59          | 9              | CCOc1ccc(cc1)C=C2[C@@H](N(C(=O)C2=O)C[C@@H]3CCCCO3)c4ccc(cc4)OC5ccc(cc5)O          |
| ZINC00702748 | 4.25  | -1.03             | -26.53           | 0        | 7           | 0      | 513.59          | 10             | CCOc1ccc(cc1)C(=O)C[C@@H]2[C@@H](N(C(=O)C2=O)C[C@@H]3CCCCO3)c4ccc(cc4)OC5ccc(cc5)O |
| ZINC08440856 | 3.58  | 1.27              | -14.72           | 0        | 6           | 0      | 445.294         | 4              | CC(=O)O1ccc(cc1OC)/C=C/2/c(=O)n3c4ccc(cc3s2)Br                                     |
| ZINC08440855 | 7.97  | -0.38             | -7.85            | 1        | 3           | 0      | 661.321         | 4              | CC1(C2=C([C@@H](Nc3c2c4ccc(cc3)c5ccc(cc5)OC=C)C)C(=O)C1)C                          |
| ZINC08440854 | 6.25  | 1.89              | -11.86           | 0        | 6           | 0      | 489.612         | 8              | CCOC(=O)C1[C@@H](C2=C(CCC2=O)N=C1)C3ccc(c(s3)OC)OC4ccc(cc4)C                       |
| ZINC08440854 | 6.25  | 1.54              | -16.15           | 0        | 6           | 0      | 489.612         | 8              | CCOC(=O)C1=C(N=C2CCCC(=O)C2)[C@@H]1c3ccc(c(s3)OC)OC4ccc(cc4)C                      |
| ZINC08440854 | 6.43  | 0.62              | -12.97           | 0        | 6           | 0      | 489.612         | 8              | CCOC(=O)C1[C@@H](C2(C=NC1=C)CCCC2=O)c3ccc(c(s3)OC)OC4ccc(cc4)C                     |
| ZINC08440853 | 7.97  | 0.22              | -7.26            | 1        | 3           | 0      | 661.321         | 4              | CC1(C2=C([C@@H](Nc3c2c4ccc(cc3)c5ccc(cc5)OC=C)C)C(=O)C1)C                          |

Supplementary Table S2:

Detailed table of XP Docking using Schrodinger's Glide module

| ZINC_ID      | sLogP | ApolarDesolvation | PolarDesolvation | H Donors | H Acceptors | Charge | MolecularWeight | RotatableBonds | SMILES                                                                                               |
|--------------|-------|-------------------|------------------|----------|-------------|--------|-----------------|----------------|------------------------------------------------------------------------------------------------------|
| ZINC08440852 | 5.21  | -1.73             | -16.09           | 1        | 6           | 0      | 548.433         | 8              | c1ccc(cc1)C0c2ccc(cc2)C@H3C=C(C(=O)N3C[C@@H]4CCCCO4)O(C=O)c5ccc(cc5)Br                               |
| ZINC08440852 | 4.63  | -1.84             | -25.25           | 0        | 6           | 0      | 548.433         | 8              | c1ccc(cc1)C0c2ccc(cc2)C@H3C[C@@H](C(=O)N3C[C@@H]4CCCCO4)C(=O)c5ccc(cc5)Br                            |
| ZINC02063377 | 6.85  | 1.84              | -13.79           | 1        | 6           | 0      | 468.944         | 5              | Cc1ccc(cc1)Cn2nc3ccc(cc3n2)NC(=O)/C=C/c4ccc(o4)c5ccc(cc5)Cl                                          |
| ZINC00850295 | 6.26  | 1.57              | -13.39           | 1        | 6           | 0      | 454.917         | 5              | Cc1ccc(cc1)n2n3ccc(cc3n2)NC(=O)/C=C/c4ccc(o4)c5ccc(cc5)Cl                                            |
| ZINC02063375 | 6.94  | -0.29             | -18.86           | 1        | 6           | 0      | 464.521         | 7              | Cc1cc(c2c(c1)nc(o2)c3ccc(c3)NC(=O)C(Oc4ccc4)O)c5ccc(cc5)C                                            |
| ZINC08440851 | 5.21  | -1.6              | -14.67           | 1        | 6           | 0      | 548.433         | 8              | c1ccc(cc1)C0c2ccc(cc2)C@H3C=C(C(=O)N3C[C@@H]4CCCCO4)O(C=O)c5ccc(cc5)Br                               |
| ZINC08440851 | 4.63  | -1.76             | -21.33           | 0        | 6           | 0      | 548.433         | 8              | c1ccc(cc1)C0c2ccc(cc2)C@H3C[C@@H](C(=O)N3C[C@@H]4CCCCO4)C(=O)c5ccc(cc5)Br                            |
| ZINC02063374 | 6.9   | -0.56             | -18.69           | 1        | 4           | 0      | 453.361         | 4              | Cc1ccc(cc1)NC(=O)c2ccc(cc2)CBr3cnc4ccc4s3                                                            |
| ZINC02063373 | 6.81  | -0.64             | -13.48           | 1        | 5           | 0      | 452.535         | 7              | c1ccc(cc1)OC(C(=O)Nc2ccc(cc2)c3nc4ccc4s3)O)c5ccc(cc5)C                                               |
| ZINC08440850 | 6.25  | 1.93              | -11.74           | 0        | 6           | 0      | 489.612         | 8              | CCOC(=O)C1=C(N=C2CCC(=O)N=C1)C3ccc(c(c3)OC)OC4c(cc4C)C                                               |
| ZINC08440850 | 6.25  | 1.73              | -15.28           | 0        | 6           | 0      | 489.612         | 8              | CCOC(=O)C1=C(N=C2CCC(=O)N=C1)C3ccc(c(c3)OC)OC4c(cc4C)C                                               |
| ZINC08440850 | 6.43  | 0.87              | -13.32           | 0        | 6           | 0      | 489.612         | 8              | CCOC(=O)C1=C(N=C2CCC(=O)N=C1)C3ccc(c(c3)OC)OC4c(cc4C)C                                               |
| ZINC08440849 | 3.86  | -1.76             | -12.96           | 1        | 6           | 0      | 447.31          | 4              | C0c1ccc(cc1Br)c2csc(n2)NC(=O)c3ccc4c(c3)OCCO4                                                        |
| ZINC08440848 | 5.21  | -1.52             | -14.83           | 1        | 6           | 0      | 548.433         | 8              | c1ccc(cc1)C0c2ccc(cc2)C@H3C=C(C(=O)N3C[C@@H]4CCCCO4)O(C=O)c5ccc(cc5)Br                               |
| ZINC08440848 | 4.63  | -1.68             | -21.43           | 0        | 6           | 0      | 548.433         | 8              | c1ccc(cc1)C0c2ccc(cc2)C@H3C[C@@H](C(=O)N3C[C@@H]4CCCCO4)C(=O)c5ccc(cc5)Br                            |
| ZINC08440847 | 7.14  | -3.68             | -12.6            | 2        | 5           | 0      | 610.189         | 3              | Cc1cc(c2c(c1)nc(o2)c3ccc(cc3)NC(=O)c4ccc(cc4))C                                                      |
| ZINC02063370 | 6.13  | 7.32              | -14.07           | 2        | 5           | 0      | 484.293         | 3              | Cc1cc2(cc1)C(=O)c2c3ccc(cc3)NC(=O)c4ccc(cc4)C                                                        |
| ZINC08440846 | 5.12  | 10.83             | -9.92            | 3        | 6           | 0      | 524.422         | 3              | c1ccc(cc1)C[C@@H]2CC=C3[C@@H](C2)[C@@H]4c5ccc(cc5NC4=O)Br)C(C(=O)N3C[C@@H]4CCCCO4)O(C=O)c5ccc(cc5)Br |
| ZINC08440846 | 5.21  | 0.26              | -34.44           | 3        | 6           | 1      | 525.43          | 3              | c1ccc(cc1)C[C@@H]2CC=C3[C@@H](C2)[C@@H]4c5ccc(cc5NC4=O)Br)C(C(=O)N3C[C@@H]4CCCCO4)O(C=O)c5ccc(cc5)Br |
| ZINC08440845 | 5.21  | -1.75             | -15.78           | 1        | 6           | 0      | 548.433         | 8              | c1ccc(cc1)C0c2ccc(cc2)C@H3C=C(C(=O)N3C[C@@H]4CCCCO4)O(C=O)c5ccc(cc5)Br                               |
| ZINC08440845 | 4.63  | -1.85             | -24.84           | 0        | 6           | 0      | 548.433         | 8              | c1ccc(cc1)C0c2ccc(cc2)C@H3C[C@@H](C(=O)N3C[C@@H]4CCCCO4)C(=O)c5ccc(cc5)Br                            |
| ZINC08440844 | 5.12  | 10.88             | -10.31           | 3        | 6           | 0      | 524.422         | 3              | c1ccc(cc1)C[C@@H]2CC=C3[C@@H](C2)[C@@H]4c5ccc(cc5NC4=O)Br)C(C(=O)N3C[C@@H]4CCCCO4)O(C=O)c5ccc(cc5)Br |
| ZINC08440844 | 5.21  | 0.03              | -37.84           | 3        | 6           | 1      | 525.43          | 3              | c1ccc(cc1)C[C@@H]2CC=C3[C@@H](C2)[C@@H]4c5ccc(cc5NC4=O)Br)C(C(=O)N3C[C@@H]4CCCCO4)O(C=O)c5ccc(cc5)Br |
| ZINC0702741  | 5.08  | 13.56             | -53.6            | 0        | 6           | -1     | 502.974         | 8              | c1ccc(cc1)C0c2ccc(cc2)C@H3C=C(C(=O)N3C[C@@H]4CCCCO4)O(C=O)c5ccc(cc5)Cl                               |
| ZINC0702741  | 5.53  | -1.49             | -30.86           | 1        | 6           | 0      | 503.982         | 7              | c1ccc(cc1)C0c2ccc(cc2)C@H3C=C(C(=O)N3C[C@@H]4CCCCO4)O(C=O)c5ccc(cc5)Cl                               |
| ZINC0702741  | 4.5   | -1.23             | -25.46           | 0        | 6           | 0      | 503.982         | 8              | c1ccc(cc1)C0c2ccc(cc2)C@H3C[C@@H](C(=O)N3C[C@@H]4CCCCO4)O(C=O)c5ccc(cc5)Cl                           |
| ZINC08440843 | 5.12  | 10.79             | -10.78           | 3        | 6           | 0      | 524.422         | 3              | c1ccc(cc1)C[C@@H]2CC=C3[C@@H](C2)[C@@H]4c5ccc(cc5NC4=O)Br)C(C(=O)N3C[C@@H]4CCCCO4)O(C=O)c5ccc(cc5)Cl |
| ZINC08440843 | 5.21  | 0.12              | -41.91           | 3        | 6           | 1      | 525.43          | 3              | c1ccc(cc1)C[C@@H]2CC=C3[C@@H](C2)[C@@H]4c5ccc(cc5NC4=O)Br)C(C(=O)N3C[C@@H]4CCCCO4)O(C=O)c5ccc(cc5)Cl |
| ZINC08440842 | 6.21  | 13.78             | -17.12           | 1        | 5           | 0      | 510.428         | 6              | Cc1ccc(cc1)C0c2ccc(cc2)Br)C@H3C4=C(C(=O)N3C[C@@H]4CCCCO4)O(C=O)c5ccc(cc5)Cl                          |
| ZINC08440842 | 6.33  | -1.02             | -9.95            | 0        | 5           | 0      | 510.428         | 6              | Cc1ccc(cc1)C0c2ccc(cc2)Br)C@H3C4=C(C(=O)N3C[C@@H]4CCCCO4)O(C=O)c5ccc(cc5)Cl                          |
| ZINC08440841 | 5.12  | 8.48              | -9.01            | 3        | 6           | 0      | 524.422         | 3              | c1ccc(cc1)C[C@@H]2CC=C3[C@@H](C2)[C@@H]4c5ccc(cc5NC4=O)Br)C(C(=O)N3C[C@@H]4CCCCO4)O(C=O)c5ccc(cc5)Cl |
| ZINC08440841 | 5.21  | -0.44             | -39.49           | 3        | 6           | 1      | 525.43          | 3              | c1ccc(cc1)C[C@@H]2CC=C3[C@@H](C2)[C@@H]4c5ccc(cc5NC4=O)Br)C(C(=O)N3C[C@@H]4CCCCO4)O(C=O)c5ccc(cc5)Cl |
| ZINC08440840 | 2.38  | 6.93              | -12.18           | 2        | 8           | 0      | 428.857         | 5              | C0c1ccc(cc1)N(C=C2/C(C(=O)N3C[C@@H]4CCCCO4)O(C=O)c5ccc(cc5)Cl)C3C#N                                  |
| ZINC08440840 | 2.38  | 6.93              | -12.15           | 2        | 8           | 0      | 428.857         | 5              | C0c1ccc(cc1)N(C=C2/C(C(=O)N3C[C@@H]4CCCCO4)O(C=O)c5ccc(cc5)Cl)C3C#N                                  |
| ZINC0702742  | 5.08  | 13.78             | -54.41           | 0        | 6           | -1     | 502.974         | 8              | c1ccc(cc1)C0c2ccc(cc2)C@H3C=C(C(=O)N3C[C@@H]4CCCCO4)O(C=O)c5ccc(cc5)Cl                               |
| ZINC0702742  | 5.53  | -1.37             | -31.26           | 1        | 6           | 0      | 503.982         | 7              | c1ccc(cc1)C0c2ccc(cc2)C@H3C=C(C(=O)N3C[C@@H]4CCCCO4)O(C=O)c5ccc(cc5)Cl                               |
| ZINC0702742  | 4.5   | -1.14             | -21.52           | 0        | 6           | 0      | 503.982         | 8              | c1ccc(cc1)C0c2ccc(cc2)C@H3C[C@@H](C(=O)N3C[C@@H]4CCCCO4)O(C=O)c5ccc(cc5)Cl                           |
| ZINC08440837 | 0.32  | 5.84              | -15.99           | 2        | 9           | 0      | 420.425         | 4              | c1ccc(cc1)N2C(=O)/C=C/Nc3ccc(cc3)C(=O)N4C(CO)C(=O)N2=O                                               |
| ZINC0070425  | 4.49  | 8.28              | -9.71            | 2        | 4           | 0      | 334.504         | 4              | C1CCC(C1)C(=O)N[C@@H]2CC(C)C@H2NC(=O)C3CCC(C3)                                                       |
| ZINC08440836 | 6.21  | 13.79             | -17.08           | 1        | 5           | 0      | 510.428         | 6              | Cc1ccc(cc1)C0c2ccc(cc2)Br)C@H3C4=C(C(=O)N3C[C@@H]4CCCCO4)O(C=O)c5ccc(cc5)Cl                          |
| ZINC08440836 | 6.33  | -0.81             | -9.12            | 0        | 5           | 0      | 510.428         | 6              | Cc1ccc(cc1)C0c2ccc(cc2)Br)C@H3C4=C(C(=O)N3C[C@@H]4CCCCO4)O(C=O)c5ccc(cc5)Cl                          |
| ZINC0702743  | 5.08  | 13.43             | -58.57           | 0        | 6           | -1     | 502.974         | 8              | c1ccc(cc1)C0c2ccc(cc2)C@H3C=C(C(=O)N3C[C@@H]4CCCCO4)O(C=O)c5ccc(cc5)Cl                               |
| ZINC0702743  | 5.53  | -1.29             | -31              | 1        | 6           | 0      | 503.982         | 7              | c1ccc(cc1)C0c2ccc(cc2)C@H3C=C(C(=O)N3C[C@@H]4CCCCO4)O(C=O)c5ccc(cc5)Cl                               |
| ZINC0702743  | 4.5   | -1.01             | -23.27           | 0        | 6           | 0      | 503.982         | 8              | c1ccc(cc1)C0c2ccc(cc2)C@H3C[C@@H](C(=O)N3C[C@@H]4CCCCO4)C(=O)c5ccc(cc5)Cl                            |
| ZINC08440835 | 4.02  | 0.98              | -21.11           | 1        | 6           | 0      | 424.403         | 7              | c1ccc(cc1)C0c2ccc(cc2)C@H3C=C(C(=O)N3C[C@@H]4CCCCO4)O(C=O)c5ccc(cc5)Cl                               |
| ZINC0702744  | 5.08  | 13.05             | -57.94           | 0        | 6           | -1     | 502.974         | 8              | c1ccc(cc1)C0c2ccc(cc2)C@H3C=C(C(=O)N3C[C@@H]4CCCCO4)O(C=O)c5ccc(cc5)Cl                               |
| ZINC0702744  | 5.53  | -1.5              | -31.57           | 1        | 6           | 0      | 503.982         | 7              | c1ccc(cc1)C0c2ccc(cc2)C@H3C=C(C(=O)N3C[C@@H]4CCCCO4)O(C=O)c5ccc(cc5)Cl                               |
| ZINC0702744  | 4.5   | -1.23             | -25.04           | 0        | 6           | 0      | 503.982         | 8              | c1ccc(cc1)C0c2ccc(cc2)C@H3C[C@@H](C(=O)N3C[C@@H]4CCCCO4)C(=O)c5ccc(cc5)Cl                            |
| ZINC08440834 | 3.22  | -2.92             | -53.13           | 1        | 10          | 1      | 509.564         | 6              | Cc1ccc(cc1)N(=O)O(=O)S(=O)(=O)N2C(C)N1C(C)C2CN3C(=O)c4ccc5c4ccc5C3=O                                 |
| ZINC08440833 | 4.8   | -0.36             | -17.92           | 1        | 6           | 0      | 610.193         | 3              | Cc1c(c(n1)c2ccc(cc2)O)/C=C3/C(=O)N3C(=O)c4ccc(cc4)C                                                  |
| ZINC08440831 | 5.49  | 0.63              | -12.89           | 1        | 6           | 0      | 544.401         | 8              | c1ccc(cc1)C0c2ccc(cc2)C@H3C=C(C(=O)N3C[C@@H]4CCCCO4)O(C=O)c5ccc(cc5)Br                               |
| ZINC08440831 | 4.91  | 0.46              | -17.89           | 0        | 6           | 0      | 544.401         | 8              | c1ccc(cc1)C0c2ccc(cc2)C@H3C[C@@H](C(=O)N3C[C@@H]4CCCCO4)C(=O)c5ccc(cc5)Br                            |
| ZINC0848923  | 4.52  | -0.29             | -18.12           | 1        | 6           | 0      | 563.193         | 3              | Cc1c(c(n1)c2ccc(cc2)Br)O/C=C3/C(=O)N3C(=O)c4ccc(cc4)C                                                |
| ZINC08440830 | 6.08  | 13.68             | -17.18           | 1        | 5           | 0      | 465.977         | 6              | Cc1ccc(cc1)C0c2ccc(cc2)C@H3C4=C(C(=O)N3C[C@@H]4CCCCO4)O(C=O)c5ccc(cc5)Cl                             |
| ZINC08440830 | 6.2   | -0.41             | -10.04           | 0        | 5           | 0      | 465.977         | 6              | Cc1ccc(cc1)C0c2ccc(cc2)C@H3C4=C(C(=O)N3C[C@@H]4CCCCO4)O(C=O)c5ccc(cc5)Cl                             |
| ZINC08440829 | 6.21  | 1.19              | -9.47            | 0        | 5           | 0      | 444.965         | 5              | CCOC(=O)C1=C(N=C2N(C(=O)C=C3CC3)/S2)C@H1c4ccc(cc4)C                                                  |
| ZINC08440828 | 6.21  | 1.08              | -9.24            | 0        | 5           | 0      | 444.965         | 5              | CCOC(=O)C1=C(N=C2N(C(=O)C=C3CC3)/S2)C@H1c4ccc(cc4)C                                                  |
| ZINC08440827 | 5.36  | 13.49             | -56.67           | 0        | 6           | -1     | 498.942         | 8              | c1ccc(cc1)C0c2ccc(cc2)C@H3C=C(C(=O)N3C[C@@H]4CCCCO4)O(C=O)c5ccc(cc5)Cl                               |
| ZINC08440827 | 5.81  | 0.86              | -27.55           | 1        | 6           | 0      | 499.95          | 7              | c1ccc(cc1)C0c2ccc(cc2)C@H3C=C(C(=O)N3C[C@@H]4CCCCO4)O(C=O)c5ccc(cc5)Cl                               |
| ZINC08440827 | 4.78  | 1.15              | -19.47           | 0        | 6           | 0      | 499.95          | 8              | c1ccc(cc1)C0c2ccc(cc2)C@H3C[C@@H](C(=O)N3C[C@@H]4CCCCO4)C(=O)c5ccc(cc5)Cl                            |
| ZINC08440826 | 8.14  | 2.88              | -15.6            | 0        | 6           | 0      | 539.44          | 6              | CCOC(=O)C1=C(N=C2N(C(=O)C=C3CC3)/S2)C@H1c5ccc(cc5)Cl                                                 |

Supplementary Table S2:

Detailed table of XP Docking using Schrodinger's Glide module

| ZINC_ID      | sLogP | ApolarDesolvation | PolarDesolvation | H Donors | H Acceptors | Charge | MolecularWeight | RotatableBonds | SMILES                                                                         |
|--------------|-------|-------------------|------------------|----------|-------------|--------|-----------------|----------------|--------------------------------------------------------------------------------|
| ZINC08440825 | 8.14  | 2.89              | -15.34           | 0        | 6           | 0      | 539.44          | 6              | CCOC(=O)C1=C(N=C2n(c1=O)/c(=C/c3ccc(o3)c4cccc(c4)C1)/s2)C@H]1c5ccc(cc5)C1C     |
| ZINC08440824 | 8.77  | 2.72              | -13.14           | 0        | 6           | 0      | 573.885         | 6              | CCOC(=O)C1=C(N=C2n(c1=O)/c(=C/c3ccc(o3)c4ccc(ccc4)C1)/s2)C@H]1c5ccc(cc5)C1C    |
| ZINC08440823 | 8.77  | 2.74              | -13.37           | 0        | 6           | 0      | 573.885         | 6              | CCOC(=O)C1=C(N=C2n(c1=O)/c(=C/c3ccc(o3)c4ccc(ccc4)C1)/s2)C@H]1c5ccc(cc5)C1C    |
| ZINC08440822 | 6.08  | 13.69             | -17.21           | 1        | 5           | 0      | 465.977         | 6              | Cc1cc(c1COC2ccc(cc2)C)C@H]3C4=C(CCC4=O)NC(=C3C(=O)OC)C1C                       |
| ZINC08440822 | 6.2   | -0.2              | -9.22            | 0        | 5           | 0      | 465.977         | 6              | Cc1cc(c1COC2ccc(cc2)C)C@H]3C4=C(CCC4=O)NC(=C3C(=O)OC)C1C                       |
| ZINC00702738 | 5.36  | 14.22             | -54.73           | 0        | 6           | -1     | 498.942         | 8              | c1ccc(cc1)COC2ccc(cc2)C@H]3C(=C(C(=O)N3Cc4ccc4)O)C(=O)C5ccc(cc5)C1             |
| ZINC00702738 | 5.81  | 0.46              | -29.22           | 1        | 6           | 0      | 499.95          | 7              | c1ccc(cc1)COC2ccc(cc2)C@H]3C(=C(C4ccc(cc4)C1)O)C(=O)C(=O)N3Cc5ccc5             |
| ZINC00702738 | 4.78  | 0.76              | -23.97           | 0        | 6           | 0      | 499.95          | 8              | c1ccc(cc1)COC2ccc(cc2)C@H]3C@H]3C(=O)C(=O)N3Cc4ccc4)C(=O)C5ccc(cc5)C1          |
| ZINC02063313 | 7.52  | 3.15              | -11.92           | 0        | 6           | 0      | 590.543         | 6              | CCOC(=O)C1=C(N=C2n(c1=O)/c(=C/c3ccc(n(c3)C4ccc(cc4)Br)C)/s2)C@H]1c5ccc(cc5)C1C |
| ZINC02063315 | 7.52  | 2.99              | -11.85           | 0        | 6           | 0      | 590.543         | 6              | CCOC(=O)C1=C(N=C2n(c1=O)/c(=C/c3ccc(n(c3)C4ccc(cc4)Br)C)/s2)C@H]1c5ccc(cc5)C1C |
| ZINC08440821 | 7.16  | 4.23              | -11.95           | 0        | 6           | 0      | 525.674         | 6              | CCOC(=O)C1=C(N=C2n(c1=O)/c(=C/c3ccc(n(c3)C4ccc(cc4)C)C)/s2)C@H]1c5ccc(cc5)C1C  |
| ZINC02063311 | 7.16  | 4.07              | -11.85           | 0        | 6           | 0      | 525.674         | 6              | CCOC(=O)C1=C(N=C2n(c1=O)/c(=C/c3ccc(n(c3)C4ccc(cc4)C)C)/s2)C@H]1c5ccc(cc5)C1C  |
| ZINC00667142 | 4.61  | 0.63              | -11.64           | 1        | 7           | 0      | 511.361         | 6              | Cc1ccc(cc1)N2C(=O)C(=C/c3ccc(c3)OC)C4ccc(cc4)C1)C(=O)NC2=O                     |
| ZINC00647877 | 3.71  | 2.57              | -22.86           | 3        | 6           | 0      | 475.474         | 4              | c1ccc(cc1)c2c(c1nH)n2)C@H]3C(=C(N(C4=C3C(=O)CCC4)c5ccc(cc5)C(F)(F)F)N)C#N      |
| ZINC08440820 | 4.41  | 10.78             | -56.37           | 0        | 6           | -1     | 452.502         | 9              | CCCCOc1ccc(cc1)C@H]2C(=C(C(=O)N2C(C@H]3CCC03)O)C(=O)C4ccc(cc4)F                |
| ZINC08440820 | 4.86  | -0.22             | -25.47           | 1        | 6           | 0      | 453.51          | 8              | CCCCOc1ccc(cc1)C@H]2C(=C(C3ccc(cc3)F)O)C(=O)C(=O)N2C(C@H]4CCCC04               |
| ZINC08440820 | 3.83  | 0                 | -15.37           | 0        | 6           | 0      | 453.51          | 9              | CCCCOc1ccc(cc1)C@H]2C@H]2C(=O)C(=O)N2C(C@H]3CCC03)C(=O)C4ccc(cc4)F             |
| ZINC08440818 | 4.41  | 10.74             | -58.46           | 0        | 6           | -1     | 452.502         | 9              | CCCCOc1ccc(cc1)C@H]2C(=C(C(=O)N2C(C@H]3CCC03)O)C(=O)C4ccc(cc4)F                |
| ZINC08440818 | 4.86  | -0.44             | -30.44           | 1        | 6           | 0      | 453.51          | 8              | CCCCOc1ccc(cc1)C@H]2C(=C(C3ccc(cc3)F)O)C(=O)C(=O)N2C(C@H]4CCCC04               |
| ZINC08440818 | 3.83  | -0.14             | -22.23           | 0        | 6           | 0      | 453.51          | 9              | CCCCOc1ccc(cc1)C@H]2C@H]2C(=O)C(=O)N2C(C@H]3CCC03)C(=O)C4ccc(cc4)F             |
| ZINC08440815 | 4.41  | 11.48             | -55.71           | 0        | 6           | -1     | 452.502         | 9              | CCCCOc1ccc(cc1)C@H]2C(=C(C(=O)N2C(C@H]3CCC03)O)C(=O)C4ccc(cc4)F                |
| ZINC08440815 | 4.86  | -0.36             | -30.16           | 1        | 6           | 0      | 453.51          | 8              | CCCCOc1ccc(cc1)C@H]2C(=C(C3ccc(cc3)F)O)C(=O)C(=O)N2C(C@H]4CCCC04               |
| ZINC08440815 | 3.83  | -0.07             | -22.34           | 0        | 6           | 0      | 453.51          | 9              | CCCCOc1ccc(cc1)C@H]2C@H]2C(=O)C(=O)N2C(C@H]3CCC03)C(=O)C4ccc(cc4)F             |
| ZINC08440813 | 4.3   | 11.93             | -139.13          | 0        | 11          | -2     | 499.387         | 4              | c1ccc2c(c1)c(c(=O)O)C2(C3ccc4(c3)N(=O)O)C4)c5c6cccc6oc5=O)O)O)O]               |
| ZINC08440813 | 4.3   | 11.14             | -63.38           | 1        | 11          | -1     | 500.395         | 4              | c1ccc2c(c1)c(c(=O)O)C2(C3ccc4(c3)N(=O)O)C4)c5c6cccc6oc5=O)O)O)O]               |
| ZINC08440812 | 4.41  | 11.11             | -56.4            | 0        | 6           | -1     | 452.502         | 9              | CCCCOc1ccc(cc1)C@H]2C(=C(C(=O)N2C(C@H]3CCC03)O)C(=O)C4ccc(cc4)F                |
| ZINC08440812 | 4.86  | -0.68             | -31.75           | 1        | 6           | 0      | 453.51          | 8              | CCCCOc1ccc(cc1)C@H]2C(=C(C3ccc(cc3)F)O)C(=O)C(=O)N2C(C@H]4CCCC04               |
| ZINC08440812 | 3.83  | -0.39             | -25.56           | 0        | 6           | 0      | 453.51          | 9              | CCCCOc1ccc(cc1)C@H]2C@H]2C(=O)C(=O)N2C(C@H]3CCC03)C(=O)C4ccc(cc4)F             |
| ZINC02334044 | 5.11  | -5.94             | -15.71           | 3        | 9           | 0      | 457.362         | 11             | CC(C)Nc1nc(nc1)OCNC(=O)COC2ccc(cc2)C1)NC(C)C                                   |
| ZINC08440810 | 5.21  | 12.18             | -54.18           | 0        | 6           | -1     | 464.925         | 9              | CCCCOc1ccc(cc1)C@H]2C(=C(C(=O)N2C(C3ccc03)O)C(=O)C4ccc(cc4)C1                  |
| ZINC08440810 | 5.65  | 0.81              | -26.76           | 1        | 6           | 0      | 465.933         | 8              | CCCCOc1ccc(cc1)C@H]2C(=C(C3ccc(cc3)C1)O)C(=O)C(=O)N2C4ccc4                     |
| ZINC08440810 | 4.62  | 1.05              | -16.91           | 0        | 6           | 0      | 465.933         | 9              | CCCCOc1ccc(cc1)C@H]2C@H]2C(=O)C(=O)N2C(C3ccc03)C(=O)C4ccc(cc4)C1               |
| ZINC00667115 | 6.18  | -0.16             | -15.32           | 2        | 5           | 0      | 451.309         | 5              | c1ccc(cc1)C(=O)Nc2ccc(cc2)NC(=O)c3ccc(o3)c4ccc(cc4)C1                          |
| ZINC00848995 | 6.01  | 10.6              | -11.32           | 1        | 7           | 0      | 479.323         | 5              | COC1ccc(cc1)n2nc3ccc(cc3n2)NC(=O)C4cc(o4)c5ccc(cc5)C1                          |
| ZINC00848995 | 3.66  | 4.73              | -18.97           | 3        | 7           | 0      | 403.438         | 5              | COC1ccc(cc1)N2Cc3ccc(cc3C2)C(=O)N/N=C/C4ccc(cc4)O                              |
| ZINC08440809 | 6.69  | 0.34              | -13.33           | 1        | 5           | 0      | 483.015         | 4              | [H]/N=C1/C@H](C2=CCCC[C@H]2[C@H]1(C#N)C#N)c3c(cc(c3)C)COC4ccc(cc4)C)C)C#N      |
| ZINC08440809 | 6.69  | 0.17              | -35.76           | 2        | 5           | 1      | 484.023         | 4              | Cc1cc(c(c1COC2ccc(cc2)C)C)C@H]3C@H]4CCCC=C4[C@H](C(=NH2+))C3(C#N)C#N)C#N       |
| ZINC00848993 | 6.08  | 9.23              | -20.88           | 1        | 6           | 0      | 450.281         | 4              | c1cc(c(c1)NC(=O)C2ccc(o2)c3ccc(cc3)C)C4nc5c(o4)ccc5                            |
| ZINC08440808 | 5.21  | 12.49             | -51.45           | 0        | 6           | -1     | 464.925         | 9              | CCCCOc1ccc(cc1)C@H]2C(=C(C(=O)N2Cc3ccc03)O)C(=O)C4ccc(cc4)C1                   |
| ZINC08440808 | 5.65  | 0.5               | -26.97           | 1        | 6           | 0      | 465.933         | 8              | CCCCOc1ccc(cc1)C@H]2C(=C(C3ccc(cc3)C1)O)C(=O)C(=O)N2Cc4ccc4                    |
| ZINC08440808 | 4.62  | 0.8               | -21.54           | 0        | 6           | 0      | 465.933         | 9              | CCCCOc1ccc(cc1)C@H]2C@H]2C(=O)C(=O)N2C(C3ccc03)C(=O)C4ccc(cc4)C1               |
| ZINC02063292 | 7.4   | -0.86             | -14.85           | 1        | 5           | 0      | 463.32          | 4              | Cc1ccc2c(c1)nc(o2)c3ccc(cc3)NC(=O)c4ccc(o4)c5ccc(cc5)C1                        |
| ZINC02063291 | 6.97  | -1.18             | -15.19           | 1        | 5           | 0      | 449.293         | 4              | c1ccc2c(c1)nc(o2)c3ccc(cc3)NC(=O)c4ccc(o4)c5ccc(cc5)C1                         |
| ZINC08440807 | 6.69  | 2.65              | -12.29           | 1        | 5           | 0      | 483.015         | 4              | [H]/N=C1/C@H](C2=CCCC[C@H]2[C@H]1(C#N)C#N)c3c(cc(c3)C)COC4ccc(cc4)C)C)C#N      |
| ZINC08440807 | 6.69  | 2.48              | -42.55           | 2        | 5           | 1      | 484.023         | 4              | Cc1cc(c(c1COC2ccc(cc2)C)C)C@H]3C@H]4CCCC=C4[C@H](C(=NH2+))C3(C#N)C#N)C#N       |
| ZINC08440806 | 4.01  | 10.43             | -60.34           | 0        | 7           | -1     | 434.468         | 9              | CCCCOc1ccc(cc1)C@H]2C(=C(C(=O)N2Cc3ccc03)O)C(=O)C4ccc(cc4)C                    |
| ZINC08440806 | 4.01  | 9.68              | -13.27           | 1        | 7           | 0      | 435.476         | 9              | CCCCOc1ccc(cc1)C@H]2C(=C(C(=O)N2Cc3ccc03)O)C(=O)C4ccc(cc4)C                    |
| ZINC00848992 | 6.01  | -0.09             | -8.51            | 1        | 4           | 0      | 415.301         | 4              | c1ccc(cc1)c2csc(n2)NC(=O)c3ccc(o3)c4ccc(cc4)C1                                 |
| ZINC08440805 | 6.69  | -0.94             | -12.71           | 1        | 5           | 0      | 483.015         | 4              | [H]/N=C1/C@H](C2=CCCC[C@H]2[C@H]1(C#N)C#N)c3c(cc(c3)C)COC4ccc(cc4)C)C)C#N      |
| ZINC08440805 | 6.69  | -1.12             | -43.49           | 2        | 5           | 1      | 484.023         | 4              | Cc1cc(c(c1COC2ccc(cc2)C)C)C@H]3C@H]4CCCC=C4[C@H](C(=NH2+))C3(C#N)C#N)C#N       |
| ZINC08440803 | 4.01  | 10.16             | -60.9            | 0        | 7           | -1     | 434.468         | 9              | CCCCOc1ccc(cc1)C@H]2C(=C(C(=O)N2Cc3ccc03)O)C(=O)C4ccc(cc4)C                    |
| ZINC08440803 | 4.01  | 9.41              | -13.93           | 1        | 7           | 0      | 435.476         | 9              | CCCCOc1ccc(cc1)C@H]2C(=C(C(=O)N2Cc3ccc03)O)C(=O)C4ccc(cc4)C                    |
| ZINC08440802 | 7.9   | -2.38             | -13.22           | 1        | 8           | 0      | 729.957         | 6              | c1ccc2c(c1)NC(=O)c3ccc(o3)Br]nc(o2)c4cc(c(c4)Br)OC(=O)c5ccc(o5)Br]Br           |
| ZINC00848910 | 5.64  | 0.3               | -15.15           | 1        | 5           | 0      | 424.891         | 3              | c1cc(c(c1)C)Nznc3ccc(cc3n2)NC(=O)c4ccc5c6c4ccc6CC5                             |
| ZINC00848909 | 5.21  | 0.47              | -15.18           | 1        | 6           | 0      | 434.499         | 5              | COC1ccc(cc1)n2nc3ccc(cc3n2)NC(=O)c4ccc5c6c4ccc6CC5                             |
| ZINC02063284 | 7.08  | -1.09             | -13.66           | 1        | 4           | 0      | 459.332         | 3              | c1cc2c3c(ccc(c3c1)C(=O)N4ccc5c(c4)nc(o5)c6ccc(cc6)C1)CC2                       |
| ZINC08440801 | 4.43  | 0.53              | -12.75           | 1        | 6           | 0      | 437.517         | 9              | CCCCOc1ccc(cc1)C@H]2C(=C(C(=O)N2Cc3ccc03)O)C(=O)C4ccc4                         |
| ZINC08440801 | 3.84  | 0.36              | -16.97           | 0        | 6           | 0      | 437.517         | 9              | CCCCOc1ccc(cc1)C@H]2C@H]2C(=O)C(=O)N2Cc3ccc03)C(=O)C4ccc4                      |
| ZINC08440799 | 6.69  | -2.53             | -14.3            | 1        | 5           | 0      | 483.015         | 4              | [H]/N=C1/C@H](C2=CCCC[C@H]2[C@H]1(C#N)C#N)c3c(cc(c3)C)COC4ccc(cc4)C)C)C#N      |
| ZINC08440799 | 6.69  | -1.66             | -40.39           | 2        | 5           | 1      | 484.023         | 4              | Cc1cc(c(c1COC2ccc(cc2)C)C)C@H]3C@H]4CCCC=C4[C@H](C(=NH2+))C3(C#N)C#N)C#N       |
| ZINC02063276 | 6.77  | 2.83              | -15.28           | 0        | 5           | 0      | 471.56          | 5              | Cc1cccc1c2c3cc(c(c3c4c4)nn(c4n2)c5cccc5)c6cccc6)OC1OC                          |





**Supplementary Table S2:**  
**Detailed table of XP Docking using Schrodinger's Glide module**

| ZINC_ID      | xLogP | ApolarDesolvation | PolarDesolvation | H Donors | H Acceptors | Charge | MolecularWeight | RotatableBonds | SMILES                                                                            |
|--------------|-------|-------------------|------------------|----------|-------------|--------|-----------------|----------------|-----------------------------------------------------------------------------------|
| ZINC08440783 | 6     | -0.3              | -15.47           | 1        | 7           | 0      | 505.611         | 9              | CC(C@H)(C1OC(=O)C1=C(N=C2C[C@H](CC(=O)C2[C@@H]1c3ccc(c(c3)OC)O)c4ccc(cc4)OC)C     |
| ZINC08440783 | 6.19  | -1.18             | -13.52           | 1        | 7           | 0      | 505.611         | 9              | CC(C@H)(C1OC(=O)C1C@H(C2C(=NC1=C)C[C@H](CC2=O)c3ccc(cc3)OC)c4ccc(c(c4)OC)C)O      |
| ZINC08440782 | 6.82  | 2.02              | -10.71           | 0        | 6           | 0      | 558.074         | 9              | CC1=NC2=C([C@@H](C1C(=O)OCc3ccc3)c4ccc(c4OC)OC)C(=O)C[C@@H](C2)c5ccc(cc5)C        |
| ZINC08440782 | 7     | 1.64              | -11.1            | 0        | 6           | 0      | 558.074         | 9              | COc1cccc(c1OC)[C@H]2C3C(=NC(=C)C2C(=O)OCc4ccc4)C[C@H](CC3=O)c5ccc(cc5)C           |
| ZINC08440782 | 7     | 3.1               | -16.72           | 0        | 6           | 0      | 558.074         | 9              | COc1cccc(c1OC)[C@H]2[C@@H]3C(=NC(=C)C2C(=O)OCc4ccc4)C[C@H](CC3=O)c5ccc(cc5)C      |
| ZINC08440782 | 6.82  | 1.7               | -13.25           | 0        | 6           | 0      | 558.074         | 9              | CC1=C([C@@H](C@H)2C(=N1)C[C@H](CC2=O)c3ccc(cc3)C)c4ccc(c4OC)C(=O)OCc5ccc5         |
| ZINC08440781 | 6.82  | 1.85              | -10.3            | 0        | 6           | 0      | 558.074         | 9              | CC1=NC2=C([C@@H](C1C(=O)OCc3ccc3)c4ccc(c4OC)OC)C(=O)C[C@@H](C2)c5ccc(cc5)C        |
| ZINC08440781 | 7     | 2                 | -12.18           | 0        | 6           | 0      | 558.074         | 9              | COc1cccc(c1OC)[C@H]2C3C(=NC(=C)C2C(=O)OCc4ccc4)C[C@H](CC3=O)c5ccc(cc5)C           |
| ZINC08440781 | 7     | 3.28              | -12.22           | 0        | 6           | 0      | 558.074         | 9              | COc1cccc(c1OC)[C@H]2[C@@H]3C(=NC(=C)C2C(=O)OCc4ccc4)C[C@H](CC3=O)c5ccc(cc5)C      |
| ZINC08440781 | 6.82  | 1.9               | -15.7            | 0        | 6           | 0      | 558.074         | 9              | CC1=C([C@@H](C@H)2C(=N1)C[C@H](CC2=O)c3ccc(cc3)C)c4ccc(c4OC)C(=O)OCc5ccc5         |
| ZINC0702731  | 3.99  | 9.87              | -41.71           | 0        | 6           | -1     | 485.354         | 7              | CCOc1ccc(cc1)C(=O)C2=C(C(=O)N([C@@H]2c3ccc(cc3)Br)C[C@@H]4CCCO4)O-                |
| ZINC0702731  | 4.44  | -2.08             | -30.15           | 1        | 6           | 0      | 486.362         | 6              | CCOc1ccc(cc1)C(=O)C2=C(C(=O)N([C@@H]2c3ccc(cc3)Br)C[C@@H]4CCCO4)Br                |
| ZINC0702731  | 3.41  | -1.79             | -23.44           | 0        | 6           | 0      | 486.362         | 7              | CCOc1ccc(cc1)C(=O)C[C@@H]2[C@@H](N(C(=O)C2=O)C[C@@H]3CCCO3)c4ccc(cc4)Br           |
| ZINC08440780 | 6.82  | 1.75              | -16.71           | 0        | 6           | 0      | 558.074         | 9              | CC1=NC2=C([C@@H](C1C(=O)OCc3ccc3)c4ccc(c4OC)OC)C(=O)C[C@@H](C2)c5ccc(cc5)C        |
| ZINC08440780 | 7     | 3.02              | -19.44           | 0        | 6           | 0      | 558.074         | 9              | COc1cccc(c1OC)[C@H]2[C@@H]3C(=NC(=C)C2C(=O)OCc4ccc4)C[C@H](CC3=O)c5ccc(cc5)C      |
| ZINC08440780 | 6.82  | 1.63              | -18              | 0        | 6           | 0      | 558.074         | 9              | CC1=C([C@@H](C@H)2C(=N1)C[C@H](CC2=O)c3ccc(cc3)C)c4ccc(c4OC)C(=O)OCc5ccc5         |
| ZINC08440779 | 6.14  | 3.53              | -14.68           | 1        | 6           | 0      | 478.596         | 5              | [H]/N=C/1/[C@H](C2=CCCC[C@@H]2[C@@H](C1(C#N)C#N)c3ccc(c(c3)OC)OCc4c(cc(c4C)C)C#N  |
| ZINC08440779 | 6.14  | 3.36              | -47.14           | 2        | 6           | 1      | 479.604         | 5              | Cc1cc(c(c1)C)COC2ccc(cc2OC)[C@@H]3[C@@H]4CCCC=C4[C@@H](C(=NH2+))C3(C#N)C#N)C      |
| ZINC08440778 | 6.82  | 2.34              | -10.72           | 0        | 6           | 0      | 558.074         | 9              | CC1=NC2=C([C@@H](C1C(=O)OCc3ccc3)c4ccc(c4OC)OC)C(=O)C[C@@H](C2)c5ccc(cc5)C        |
| ZINC08440778 | 7     | 2.29              | -11.67           | 0        | 6           | 0      | 558.074         | 9              | COc1cccc(c1OC)[C@H]2C3C(=NC(=C)C2C(=O)OCc4ccc4)C[C@H](CC3=O)c5ccc(cc5)C           |
| ZINC08440778 | 6.82  | 2.15              | -13.5            | 0        | 6           | 0      | 558.074         | 9              | CC1=C([C@@H](C@H)2C(=N1)C[C@H](CC2=O)c3ccc(cc3)C)c4ccc(c4OC)C(=O)OCc5ccc5         |
| ZINC08440777 | 6.8   | 1.57              | -11.9            | 0        | 4           | 0      | 465.593         | 6              | CC1=NC2=C([C@@H](C1C(=O)OC(C)C)c3ccc4c3ccc4)C(=O)C[C@@H](C2)c5ccc5                |
| ZINC08440777 | 6.98  | 1.82              | -12.22           | 0        | 4           | 0      | 465.593         | 6              | CC(C)COC(=O)C1[C@@H](C2C(=NC1=C)C[C@H](CC2=O)c3ccc3)c4ccc5c4ccc5                  |
| ZINC08440777 | 6.98  | 2.84              | -14.09           | 0        | 4           | 0      | 465.593         | 6              | CC(C)COC(=O)C1[C@@H](C@H)2C(=NC1=C)C[C@H](CC2=O)c3ccc3)c4ccc5c4ccc5               |
| ZINC08440777 | 6.8   | 1.57              | -13.34           | 0        | 4           | 0      | 465.593         | 6              | CC1=C([C@@H](C@H)2C(=N1)C[C@H](CC2=O)c3ccc3)c4ccc5c4ccc5)C(=O)OC(C)C              |
| ZINC0702732  | 3.99  | 9.69              | -40.99           | 0        | 6           | -1     | 485.354         | 7              | CCOc1ccc(cc1)C(=O)C2=C(C(=O)N([C@@H]2c3ccc(cc3)Br)C[C@@H]4CCCO4)O-                |
| ZINC0702732  | 4.44  | -2.36             | -30.67           | 1        | 6           | 0      | 486.362         | 6              | CCOc1ccc(cc1)C(=O)C2=C(C(=O)N([C@@H]2c3ccc(cc3)Br)C[C@@H]4CCCO4)Br                |
| ZINC0702732  | 3.41  | -2.06             | -25.18           | 0        | 6           | 0      | 486.362         | 7              | CCOc1ccc(cc1)C(=O)C[C@@H]2[C@@H](N(C(=O)C2=O)C[C@@H]3CCCO3)c4ccc(cc4)Br           |
| ZINC08440776 | 6.14  | 3.53              | -14.67           | 1        | 6           | 0      | 478.596         | 5              | [H]/N=C/1/[C@H](C2=CCCC[C@@H]2[C@@H](C1(C#N)C#N)c3ccc(c(c3)OC)OCc4c(cc(c4C)C)C#N  |
| ZINC08440776 | 6.14  | 3.36              | -47.17           | 2        | 6           | 1      | 479.604         | 5              | Cc1cc(c(c1)C)COC2ccc(cc2OC)[C@@H]3[C@@H]4CCCC=C4[C@@H](C(=NH2+))C3(C#N)C#N)C      |
| ZINC08440775 | 6.8   | 1.4               | -7.74            | 0        | 4           | 0      | 465.593         | 6              | CC1=NC2=C([C@@H](C1C(=O)OC(C)C)c3ccc4c3ccc4)C(=O)C[C@@H](C2)c5ccc5                |
| ZINC08440775 | 6.98  | 1.51              | -8.82            | 0        | 4           | 0      | 465.593         | 6              | CC(C)COC(=O)C1[C@@H](C2C(=NC1=C)C[C@H](CC2=O)c3ccc3)c4ccc5c4ccc5                  |
| ZINC08440775 | 6.98  | 2.85              | -16.27           | 0        | 4           | 0      | 465.593         | 6              | CC(C)COC(=O)C1[C@@H](C@H)2C(=NC1=C)C[C@H](CC2=O)c3ccc3)c4ccc5c4ccc5               |
| ZINC08440775 | 6.8   | 1.37              | -10.81           | 0        | 4           | 0      | 465.593         | 6              | CC1=C([C@@H](C@H)2C(=N1)C[C@H](CC2=O)c3ccc3)c4ccc5c4ccc5)C(=O)OC(C)C              |
| ZINC0702727  | 4.28  | 10.23             | -38.95           | 0        | 6           | -1     | 481.322         | 7              | CCOc1ccc(cc1)C(=O)C2=C(C(=O)N([C@@H]2c3ccc(cc3)Br)C[C@@H]4CCCO4)O-                |
| ZINC0702727  | 4.72  | 0.12              | -26.35           | 1        | 6           | 0      | 482.33          | 6              | CCOc1ccc(cc1)C(=O)C2=C(C(=O)N([C@@H]2c3ccc(cc3)Br)C[C@@H]4CCCO4)Br                |
| ZINC0702727  | 3.69  | 0.4               | -19.37           | 0        | 6           | 0      | 482.33          | 7              | CCOc1ccc(cc1)C(=O)C[C@@H]2[C@@H](N(C(=O)C2=O)C[C@@H]3CCCO3)c4ccc(cc4)Br           |
| ZINC08440774 | 6.8   | 1.26              | -8               | 0        | 4           | 0      | 465.593         | 6              | CC1=NC2=C([C@@H](C1C(=O)OC(C)C)c3ccc4c3ccc4)C(=O)C[C@@H](C2)c5ccc5                |
| ZINC08440774 | 6.98  | 1.29              | -8.86            | 0        | 4           | 0      | 465.593         | 6              | CC(C)COC(=O)C1[C@@H](C2C(=NC1=C)C[C@H](CC2=O)c3ccc3)c4ccc5c4ccc5                  |
| ZINC08440774 | 6.98  | 2.22              | -8.26            | 0        | 4           | 0      | 465.593         | 6              | CC(C)COC(=O)C1[C@@H](C@H)2C(=NC1=C)C[C@H](CC2=O)c3ccc3)c4ccc5c4ccc5               |
| ZINC08440774 | 6.8   | 1.39              | -11.18           | 0        | 4           | 0      | 465.593         | 6              | CC1=C([C@@H](C@H)2C(=N1)C[C@H](CC2=O)c3ccc3)c4ccc5c4ccc5)C(=O)OC(C)C              |
| ZINC08440773 | 6.14  | 3.67              | -15              | 1        | 6           | 0      | 478.596         | 5              | [H]/N=C/1/[C@H](C2=CCCC[C@@H]2[C@@H](C1(C#N)C#N)c3ccc(c(c3)OC)OCc4c(cc(c4C)C)C#N  |
| ZINC08440773 | 6.14  | 3.48              | -44.82           | 2        | 6           | 1      | 479.604         | 5              | Cc1cc(c(c1)C)COC2ccc(cc2OC)[C@@H]3[C@@H]4CCCC=C4[C@@H](C(=NH2+))C3(C#N)C#N)C      |
| ZINC08440772 | 4.28  | 10.54             | -37.52           | 0        | 6           | -1     | 481.322         | 7              | CCOc1ccc(cc1)C(=O)C2=C(C(=O)N([C@@H]2c3ccc(cc3)Br)C[C@@H]4CCCO4)O-                |
| ZINC08440772 | 4.72  | -0.26             | -27.52           | 1        | 6           | 0      | 482.33          | 6              | CCOc1ccc(cc1)C(=O)C2=C(C(=O)N([C@@H]2c3ccc(cc3)Br)C[C@@H]4CCCO4)Br                |
| ZINC08440772 | 3.69  | 0                 | -23.18           | 0        | 6           | 0      | 482.33          | 7              | CCOc1ccc(cc1)C(=O)C[C@@H]2[C@@H](N(C(=O)C2=O)C[C@@H]3CCCO3)c4ccc(cc4)Br           |
| ZINC08440771 | 6.8   | 1.4               | -7.85            | 0        | 4           | 0      | 465.593         | 6              | CC1=NC2=C([C@@H](C1C(=O)OC(C)C)c3ccc4c3ccc4)C(=O)C[C@@H](C2)c5ccc5                |
| ZINC08440771 | 6.98  | 1.59              | -8.94            | 0        | 4           | 0      | 465.593         | 6              | CC(C)COC(=O)C1[C@@H](C2C(=NC1=C)C[C@H](CC2=O)c3ccc3)c4ccc5c4ccc5                  |
| ZINC08440771 | 6.98  | 2.6               | -8.28            | 0        | 4           | 0      | 465.593         | 6              | CC(C)COC(=O)C1[C@@H](C@H)2C(=NC1=C)C[C@H](CC2=O)c3ccc3)c4ccc5c4ccc5               |
| ZINC08440771 | 6.8   | 1.47              | -10.64           | 0        | 4           | 0      | 465.593         | 6              | CC1=C([C@@H](C@H)2C(=N1)C[C@H](CC2=O)c3ccc3)c4ccc5c4ccc5)C(=O)OC(C)C              |
| ZINC0848043  | 5.7   | 0.26              | -13.08           | 0        | 7           | 0      | 531.649         | 9              | CC1=NC2=C([C@@H](C1C(=O)OC[C@H]3CCCO3)c4ccc(c(c4)OC)OCc5ccc5)C(=O)OC(C)C          |
| ZINC0848043  | 5.88  | 0.6               | -13.98           | 0        | 7           | 0      | 531.649         | 9              | CC1(C2=NC(=C)C[C@H](C2C(=O)C1)c3ccc(c(c3)OC)OCc4ccc4)C(=O)OC[C@H]5CCCO5           |
| ZINC0848043  | 5.88  | 1.72              | -20.83           | 0        | 7           | 0      | 531.649         | 9              | CC1(C2=NC(=C)C[C@H](C2C(=O)C1)c3ccc(c(c3)OC)OCc4ccc4)C(=O)OC[C@H]5CCCO5           |
| ZINC0848043  | 5.7   | 0.65              | -16.42           | 0        | 7           | 0      | 531.649         | 9              | CC1=C([C@@H](C@H)2C(=N1)C[C@H](CC2=O)C1)c3ccc(c(c3)OC)OCc4ccc4)C(=O)OC[C@H]5CCCO5 |
| ZINC0848044  | 5.7   | -0.71             | -18.9            | 0        | 7           | 0      | 531.649         | 9              | CC1=NC2=C([C@@H](C1C(=O)OC[C@H]3CCCO3)c4ccc(c(c4)OC)OCc5ccc5)C(=O)OC(C)C          |
| ZINC0848044  | 5.7   | 0.42              | -21.4            | 0        | 7           | 0      | 531.649         | 9              | CC1=C([C@@H](C@H)2C(=N1)C[C@H](CC2=O)C1)c3ccc(c(c3)OC)OCc4ccc4)C(=O)OC[C@H]5CCCO5 |
| ZINC0848044  | 5.88  | 0.14              | -18.76           | 0        | 7           | 0      | 531.649         | 9              | CC1(C2=NC(=C)C[C@H](C2C(=O)C1)c3ccc(c(c3)OC)OCc4ccc4)C(=O)OC[C@H]5CCCO5           |
| ZINC0702724  | 3.02  | -0.6              | -14.74           | 1        | 6           | 0      | 446.297         | 5              | Cc1ccc(c1)C(=O)C2=C(C(=O)N([C@@H]2c3ccc(cc3)Br)C[C@@H]4CCCO4)O                    |
| ZINC0702724  | 2.43  | -0.83             | -22.91           | 0        | 6           | 0      | 446.297         | 5              | Cc1ccc(c1)C(=O)C[C@@H]2[C@@H](N(C(=O)C2=O)C[C@@H]3CCCO3)c4ccc(cc4)Br              |
| ZINC0848045  | 5.7   | 0.1               | -12.85           | 0        | 7           | 0      | 531.649         | 9              | CC1=NC2=C([C@@H](C1C(=O)OC[C@H]3CCCO3)c4ccc(c(c4)OC)OCc5ccc5)C(=O)OC(C)C          |
| ZINC0848045  | 5.88  | 0.15              | -13.27           | 0        | 7           | 0      | 531.649         | 9              | CC1(C2=NC(=C)C[C@H](C2C(=O)C1)c3ccc(c(c3)OC)OCc4ccc4)C(=O)OC[C@H]5CCCO5           |

Supplementary Table S2:

Detailed table of XP Docking using Schrodinger's Glide module

| ZINC_ID      | sLogP | ApolarDesolvation | PolarDesolvation | H Donors | H Acceptors | Charge | MolecularWeight | RotatableBonds | SMILES                                                                    |
|--------------|-------|-------------------|------------------|----------|-------------|--------|-----------------|----------------|---------------------------------------------------------------------------|
| ZINC00848045 | 5.88  | 1.55              | -19.19           | 0        | 7           | 0      | 531.649         | 9              | CC1(CC2=NC=C)C(C@H)(C@H)2C(=O)C1c3ccc(c(c3)OC)OC4CCCC4C(=O)OC1C@H5CCCCO5C |
| ZINC08440770 | 4.38  | 0.44              | -12.67           | 0        | 7           | 0      | 477.557         | 9              | CC1=NC2=C(C(=O)C@H)(C1C(=O)OC)C3CCCC3OC(C)=O)C(C@H)(C2)4CCCCC4OC          |
| ZINC08440770 | 4.56  | 0.68              | -13.96           | 0        | 7           | 0      | 477.557         | 9              | COCCOC(=O)C1(C@H)(C2(=NC1=C)C(C@H)(CC2=O)c3ccc(cc3)OC)c4CCCC4OC           |
| ZINC08440770 | 4.56  | 1.67              | -13.35           | 0        | 7           | 0      | 477.557         | 9              | COCCOC(=O)C1(C@H)(C@H)2C(=NC1=C)C(C@H)(CC2=O)c3ccc(cc3)OC)c4CCCC4OC       |
| ZINC08440770 | 4.38  | 0.38              | -15.82           | 0        | 7           | 0      | 477.557         | 9              | CC1=C(C@H)(C@H)2C(=N1)C(C@H)(CC2=O)c3ccc(cc3)OC)c4CCCC4OC(C)=O)OC         |
| ZINC08440769 | 5.71  | -0.23             | -15.32           | 0        | 5           | 0      | 472.006         | 7              | CCOC(=O)C1(C@H)(C2(C(CCC2=O)N=C1)C)c3cc(c(s3)C)C0c4ccc(cc4)C              |
| ZINC08440769 | 5.71  | -0.52             | -16.84           | 0        | 5           | 0      | 472.006         | 7              | CCOC(=O)C1=C(N=C2CCC(=O)C2(C@H)1c3ccc(cc3)C)C0c4ccc(cc4)C                 |
| ZINC08440769 | 5.89  | -1.4              | -15.28           | 0        | 5           | 0      | 472.006         | 7              | CCOC(=O)C1(C@H)(C2(=NC1=C)CCC2=O)c3cc(c(s3)C)C0c4ccc(cc4)C                |
| ZINC0702725  | 3.02  | -1.2              | -15.14           | 1        | 6           | 0      | 446.297         | 5              | Cc1ccc(o1)C(=O)C2=C(C(=O)N)(C@H)2c3ccc(c3)Br)C(C@H)4CCCCO4                |
| ZINC0702725  | 2.43  | -1.4              | -22.73           | 0        | 6           | 0      | 446.297         | 5              | Cc1ccc(o1)C(=O)C@H2(C@H)(N(C(=O)C2=O)C(C@H)3CCC3)c4CCCC(c4)Br             |
| ZINC08440768 | 4.38  | 0.12              | -12.16           | 0        | 7           | 0      | 477.557         | 9              | CC1=NC2=C(C(=O)C@H)(C1C(=O)OC)C3CCCC3OC(C)=O)C(C@H)(C2)4CCCCC4OC          |
| ZINC08440768 | 4.56  | 0.22              | -13.32           | 0        | 7           | 0      | 477.557         | 9              | COCCOC(=O)C1(C@H)(C2(=NC1=C)C(C@H)(CC2=O)c3ccc(cc3)OC)c4CCCC4OC           |
| ZINC08440768 | 4.56  | 1.28              | -12.51           | 0        | 7           | 0      | 477.557         | 9              | COCCOC(=O)C1(C@H)(C@H)2C(=NC1=C)C(C@H)(CC2=O)c3ccc(cc3)OC)c4CCCC4OC       |
| ZINC08440768 | 4.38  | 0.27              | -15.6            | 0        | 7           | 0      | 477.557         | 9              | CC1=C(C@H)(C@H)2C(=N1)C(C@H)(CC2=O)c3ccc(cc3)OC)c4CCCC4OC(C)=O)OC         |
| ZINC08440767 | 4.38  | 0.34              | -12.17           | 0        | 7           | 0      | 477.557         | 9              | CC1=NC2=C(C(=O)C@H)(C1C(=O)OC)C3CCCC3OC(C)=O)C(C@H)(C2)4CCCCC4OC          |
| ZINC08440767 | 4.56  | 0.44              | -13.27           | 0        | 7           | 0      | 477.557         | 9              | COCCOC(=O)C1(C@H)(C2(=NC1=C)C(C@H)(CC2=O)c3ccc(cc3)OC)c4CCCC4OC           |
| ZINC08440767 | 4.56  | 1.51              | -12.59           | 0        | 7           | 0      | 477.557         | 9              | COCCOC(=O)C1(C@H)(C@H)2C(=NC1=C)C(C@H)(CC2=O)c3ccc(cc3)OC)c4CCCC4OC       |
| ZINC08440767 | 4.38  | 0.48              | -15.67           | 0        | 7           | 0      | 477.557         | 9              | CC1=C(C@H)(C@H)2C(=N1)C(C@H)(CC2=O)c3ccc(cc3)OC)c4CCCC4OC(C)=O)OC         |
| ZINC08440766 | 4.38  | 0.57              | -15.19           | 0        | 7           | 0      | 477.557         | 9              | CC1=NC2=C(C(=O)C@H)(C1C(=O)OC)C3CCCC3OC(C)=O)C(C@H)(C2)4CCCCC4OC          |
| ZINC08440766 | 4.56  | 0.61              | -15.63           | 0        | 7           | 0      | 477.557         | 9              | COCCOC(=O)C1(C@H)(C2(=NC1=C)C(C@H)(CC2=O)c3ccc(cc3)OC)c4CCCC4OC           |
| ZINC08440766 | 4.56  | 1.66              | -14.99           | 0        | 7           | 0      | 477.557         | 9              | COCCOC(=O)C1(C@H)(C@H)2C(=NC1=C)C(C@H)(CC2=O)c3ccc(cc3)OC)c4CCCC4OC       |
| ZINC08440766 | 4.38  | 0.36              | -17.12           | 0        | 7           | 0      | 477.557         | 9              | CC1=C(C@H)(C@H)2C(=N1)C(C@H)(CC2=O)c3ccc(cc3)OC)c4CCCC4OC(C)=O)OC         |
| ZINC0702726  | 3.02  | -1.37             | -12              | 1        | 6           | 0      | 446.297         | 5              | Cc1ccc(o1)C(=O)C2=C(C(=O)N)(C@H)2c3ccc(c3)Br)C(C@H)4CCCCO4                |
| ZINC0702726  | 2.43  | -1.56             | -17.31           | 0        | 6           | 0      | 446.297         | 5              | Cc1ccc(o1)C(=O)C@H2(C@H)(N(C(=O)C2=O)C(C@H)3CCC3)c4CCCC(c4)Br             |
| ZINC08440765 | 6.05  | 1.08              | -11.9            | 0        | 4           | 0      | 437.539         | 5              | CCOC(=O)C1(C@H)(C2=C(C(=O)C@H)(CC2=O)c3ccc(cc3)N=C1)C4CCCC54CCCC5         |
| ZINC08440765 | 6.05  | 1.11              | -14              | 0        | 4           | 0      | 437.539         | 5              | CCOC(=O)C1=C(N=C2C(C@H)(CC(=O)C2(C@H)1c3ccc4c3ccc4)c5CCCC5)C              |
| ZINC08440765 | 6.24  | 0.05              | -11.78           | 0        | 4           | 0      | 437.539         | 5              | CCOC(=O)C1(C@H)(C2(=NC1=C)C(C@H)(CC2=O)c3ccc(cc3)OC)c4CCCC54CCCC5         |
| ZINC08440764 | 6.05  | 1.12              | -8.57            | 0        | 4           | 0      | 437.539         | 5              | CCOC(=O)C1(C@H)(C2=C(C(=O)C@H)(CC2=O)c3ccc(cc3)N=C1)C4CCCC54CCCC5         |
| ZINC08440764 | 6.05  | 1.04              | -11.46           | 0        | 4           | 0      | 437.539         | 5              | CCOC(=O)C1=C(N=C2C(C@H)(CC(=O)C2(C@H)1c3ccc4c3ccc4)c5CCCC5)C              |
| ZINC08440764 | 6.24  | -0.07             | -9.49            | 0        | 4           | 0      | 437.539         | 5              | CCOC(=O)C1(C@H)(C2(=NC1=C)C(C@H)(CC2=O)c3ccc(cc3)OC)c4CCCC54CCCC5         |
| ZINC08440763 | 5.71  | -0.21             | -11.05           | 0        | 5           | 0      | 472.006         | 7              | CCOC(=O)C1(C@H)(C2=C(C(CCC2=O)N=C1)C)c3cc(c(s3)C)C0c4ccc(cc4)C            |
| ZINC08440763 | 5.71  | -0.48             | -14.6            | 0        | 5           | 0      | 472.006         | 7              | CCOC(=O)C1=C(N=C2CCC(=O)C2(C@H)1c3ccc(cc3)C)C0c4ccc(cc4)C                 |
| ZINC08440763 | 5.89  | -1.43             | -12.29           | 0        | 5           | 0      | 472.006         | 7              | CCOC(=O)C1(C@H)(C2(=NC1=C)CC2=O)c3cc(c(s3)C)C0c4ccc(cc4)C                 |
| ZINC0702715  | 1.88  | 7.34              | -70.41           | 0        | 8           | -1     | 426.445         | 7              | Cc1ccc(o1)C(=O)C2=C(C(=O)N)(C@H)2c3ccc(c3)OC)C(C@H)4CCCCO4                |
| ZINC08440762 | 6.05  | 1.09              | -11.81           | 0        | 4           | 0      | 437.539         | 5              | CCOC(=O)C1(C@H)(C2=C(C(=O)C@H)(CC2=O)c3ccc(cc3)N=C1)C4CCCC54CCCC5         |
| ZINC08440762 | 6.05  | 0.99              | -13.77           | 0        | 4           | 0      | 437.539         | 5              | CCOC(=O)C1=C(N=C2C(C@H)(CC(=O)C2(C@H)1c3ccc4c3ccc4)c5CCCC5)C              |
| ZINC08440762 | 6.24  | -0.05             | -11.64           | 0        | 4           | 0      | 437.539         | 5              | CCOC(=O)C1(C@H)(C2(=NC1=C)C(C@H)(CC2=O)c3ccc(cc3)OC)c4CCCC54CCCC5         |
| ZINC08440761 | 6.05  | 1.33              | -8.82            | 0        | 4           | 0      | 437.539         | 5              | CCOC(=O)C1(C@H)(C2=C(C(=O)C@H)(CC2=O)c3ccc(cc3)N=C1)C4CCCC54CCCC5         |
| ZINC08440761 | 6.05  | 0.95              | -11.96           | 0        | 4           | 0      | 437.539         | 5              | CCOC(=O)C1=C(N=C2C(C@H)(CC(=O)C2(C@H)1c3ccc4c3ccc4)c5CCCC5)C              |
| ZINC08440761 | 6.24  | 0.05              | -9.74            | 0        | 4           | 0      | 437.539         | 5              | CCOC(=O)C1(C@H)(C2(=NC1=C)C(C@H)(CC2=O)c3ccc(cc3)OC)c4CCCC54CCCC5         |
| ZINC0702716  | 1.88  | 7.52              | -70.22           | 0        | 8           | -1     | 426.445         | 7              | Cc1ccc(o1)C(=O)C2=C(C(=O)N)(C@H)2c3ccc(c3)OC)C(C@H)4CCCCO4                |
| ZINC08440760 | 6.85  | 1.51              | -14.77           | 0        | 6           | 0      | 537.656         | 10             | CC1=NC2=C(C(=O)C@H)(C1C(=O)OC)C3CCCC3OC(C)=O)C(C@H)(C2)c5CCCC5            |
| ZINC08440760 | 7.04  | 1.51              | -14.67           | 0        | 6           | 0      | 537.656         | 10             | CC(C)Oc1ccc(c1)C@H)2C3C(=NC(=O)C2C(=O)OC)C4CCCC4C(C@H)(CC3=O)c5CCCC5      |
| ZINC08440760 | 7.04  | 2.84              | -18.29           | 0        | 6           | 0      | 537.656         | 10             | CC(C)Oc1ccc(c1)C@H)2(C@H)3C(=NC(=O)C2C(=O)OC)C4CCCC4C(C@H)(CC3=O)c5CCCC5  |
| ZINC08440760 | 6.85  | 1.46              | -16.54           | 0        | 6           | 0      | 537.656         | 10             | CC1=C(C@H)(C@H)2C(=N1)C(C@H)(CC2=O)c3ccc(cc3)OC)c4CCCC4OC(C)=O)OC         |
| ZINC08440759 | 6.85  | 1.21              | -13.15           | 0        | 6           | 0      | 537.656         | 10             | CC1=NC2=C(C(=O)C@H)(C1C(=O)OC)C3CCCC3OC(C)=O)C(C@H)(C2)c5CCCC5            |
| ZINC08440759 | 7.04  | 1.35              | -13.4            | 0        | 6           | 0      | 537.656         | 10             | CC(C)Oc1ccc(c1)C@H)2C3C(=NC(=O)C2C(=O)OC)C4CCCC4C(C@H)(CC3=O)c5CCCC5      |
| ZINC08440759 | 7.04  | 2.51              | -13.72           | 0        | 6           | 0      | 537.656         | 10             | CC(C)Oc1ccc(c1)C@H)2(C@H)3C(=NC(=O)C2C(=O)OC)C4CCCC4C(C@H)(CC3=O)c5CCCC5  |
| ZINC08440759 | 6.85  | 1.25              | -15.48           | 0        | 6           | 0      | 537.656         | 10             | CC1=C(C@H)(C@H)2C(=N1)C(C@H)(CC2=O)c3ccc(cc3)OC)c4CCCC4OC(C)=O)OC         |
| ZINC08440758 | 6.85  | 1.44              | -15.52           | 0        | 6           | 0      | 537.656         | 10             | CC1=NC2=C(C(=O)C@H)(C1C(=O)OC)C3CCCC3OC(C)=O)C(C@H)(C2)c5CCCC5            |
| ZINC08440758 | 7.04  | 1.38              | -14.54           | 0        | 6           | 0      | 537.656         | 10             | CC(C)Oc1ccc(c1)C@H)2C3C(=NC(=O)C2C(=O)OC)C4CCCC4C(C@H)(CC3=O)c5CCCC5      |
| ZINC08440758 | 7.04  | 2.72              | -18.85           | 0        | 6           | 0      | 537.656         | 10             | CC(C)Oc1ccc(c1)C@H)2(C@H)3C(=NC(=O)C2C(=O)OC)C4CCCC4C(C@H)(CC3=O)c5CCCC5  |
| ZINC08440758 | 6.85  | 1.34              | -16.38           | 0        | 6           | 0      | 537.656         | 10             | CC1=C(C@H)(C@H)2C(=N1)C(C@H)(CC2=O)c3ccc(cc3)OC)c4CCCC4OC(C)=O)OC         |
| ZINC08440757 | 6.85  | 1.53              | -14.84           | 0        | 6           | 0      | 537.656         | 10             | CC1=NC2=C(C(=O)C@H)(C1C(=O)OC)C3CCCC3OC(C)=O)C(C@H)(C2)c5CCCC5            |
| ZINC08440757 | 7.04  | 1.67              | -14.76           | 0        | 6           | 0      | 537.656         | 10             | CC(C)Oc1ccc(c1)C@H)2C3C(=NC(=O)C2C(=O)OC)C4CCCC4C(C@H)(CC3=O)c5CCCC5      |
| ZINC08440757 | 7.04  | 2.67              | -15.47           | 0        | 6           | 0      | 537.656         | 10             | CC(C)Oc1ccc(c1)C@H)2(C@H)3C(=NC(=O)C2C(=O)OC)C4CCCC4C(C@H)(CC3=O)c5CCCC5  |
| ZINC08440757 | 6.85  | 1.61              | -16.44           | 0        | 6           | 0      | 537.656         | 10             | CC1=C(C@H)(C@H)2C(=N1)C(C@H)(CC2=O)c3ccc(cc3)OC)c4CCCC4OC(C)=O)OC         |
| ZINC08440756 | 6.36  | 0.39              | -13.8            | 0        | 5           | 0      | 500.06          | 7              | CCOC(=O)C1(C@H)(C2=C(C(=O)C@H)(CC2=O)c3ccc(cc3)OC)c4CCCC(c4)C             |
| ZINC08440756 | 6.36  | 0.55              | -15.9            | 0        | 5           | 0      | 500.06          | 7              | CCOC(=O)C1=C(N=C2CC(C(=O)C2(C@H)1c3ccc(cc3)C)C0c4ccc(cc4)C)C(C)C          |
| ZINC08440756 | 6.54  | -0.5              | -13.16           | 0        | 5           | 0      | 500.06          | 7              | CCOC(=O)C1(C@H)(C2(=NC1=C)CC(C2=O)C)C3ccc(cc3)OC)c4CCCC(c4)C              |
| ZINC0702717  | 1.88  | 7.83              | -66.41           | 0        | 8           | -1     | 426.445         | 7              | Cc1ccc(o1)C(=O)C2=C(C(=O)N)(C@H)2c3ccc(c3)OC)C(C@H)4CCCCO4                |



Supplementary Table S2:

Detailed table of XP Docking using Schrodinger's Glide module

| ZINC_ID      | sLogP | ApolarDesolvation | PolarDesolvation | H Donors | H Acceptors | Charge | MolecularWeight | RotatableBonds | SMILES                                                                         |
|--------------|-------|-------------------|------------------|----------|-------------|--------|-----------------|----------------|--------------------------------------------------------------------------------|
| ZINC08440738 | 5.11  | 0.89              | -15.89           | 0        | 5           | 0      | 469.94          | 7              | CC1=C([C@H]([C@H]2C(=N1)C[C@@H]([C@H]2)C3=CC(=O)C3)C)C4=CCCC4F(C)=O)OCCOC      |
| ZINC08440737 | 5.11  | 0.83              | -11.63           | 0        | 5           | 0      | 469.94          | 7              | CC1=NC2=C([C@H]([C1C(=O)OCCOC)C3=CCCC3F(C)=O)C[C@H]([C2]C4=CCCC4)C             |
| ZINC08440737 | 5.29  | 1.06              | -12.9            | 0        | 5           | 0      | 469.94          | 7              | COCCOC(=O)C1[C@@H]([C2C(=NC1=C)C[C@@H]([C2=O)C3=CC(=O)C3)C]C4=CCCC4F           |
| ZINC08440737 | 5.29  | 2.05              | -12.17           | 0        | 5           | 0      | 469.94          | 7              | COCCOC(=O)C1[C@@H]([C@H]2C(=NC1=C)C[C@@H]([C2=O)C3=CC(=O)C3)C]C4=CCCC4F        |
| ZINC08440737 | 5.11  | 0.95              | -15.44           | 0        | 5           | 0      | 469.94          | 7              | CC1=C([C@H]([C@H]2C(=N1)C[C@@H]([C2=O)C3=CC(=O)C3)C)C4=CCCC4F(C)=O)OCCOC       |
| ZINC05921172 | 3.11  | 9.17              | -42.6            | 0        | 8           | -1     | 462.478         | 9              | CCOC1ccc(cc1)C(=O)C2=C(C(=O)N([C@@H]2c3ccc(c3)OC)OC)C4=CCCC4)O-                |
| ZINC05921172 | 3.56  | 0.85              | -29.45           | 1        | 8           | 0      | 463.486         | 8              | CCOC1ccc(cc1)C=C2[C@H](N(C(=O)C2=O)C3=CC(=O)C3)C4=CCCC4)OC)O                   |
| ZINC05921172 | 2.53  | 1.08              | -22.99           | 0        | 8           | 0      | 463.486         | 9              | CCOC1ccc(cc1)C(=O)C[C@H]2[C@H](N(C(=O)C2=O)C3=CC(=O)C3)C4=CCCC4)OC)OC          |
| ZINC08440736 | 5.96  | 13.42             | -19.88           | 1        | 5           | 0      | 465.977         | 7              | Cc1ccc(cc1)[C@H]2C3=C(C[C@H](CC3=O)C4=CCCC4)C)NC(=C2C(=O)OCCOC)C               |
| ZINC08440736 | 6.08  | -0.81             | -8.45            | 0        | 5           | 0      | 465.977         | 7              | Cc1ccc(cc1)[C@H]2C3=C(C[C@H](C=C3N=C(C2C(=O)OCCOC)C)C4=CCCC4)C                 |
| ZINC08440735 | 5.96  | 13.44             | -19.83           | 1        | 5           | 0      | 465.977         | 7              | Cc1ccc(cc1)[C@H]2C3=C(C[C@H](CC3=O)C4=CCCC4)C)NC(=C2C(=O)OCCOC)C               |
| ZINC08440735 | 6.08  | -1.01             | -9.52            | 0        | 5           | 0      | 465.977         | 7              | Cc1ccc(cc1)[C@H]2C3C(=O)C[C@H](C=C3N=C(C2C(=O)OCCOC)C)C4=CCCC4)C               |
| ZINC08440734 | 5.96  | 13.41             | -19.87           | 1        | 5           | 0      | 465.977         | 7              | Cc1ccc(cc1)[C@H]2C3=C(C[C@H](CC3=O)C4=CCCC4)C)NC(=C2C(=O)OCCOC)C               |
| ZINC08440734 | 6.08  | -0.89             | -8.42            | 0        | 5           | 0      | 465.977         | 7              | Cc1ccc(cc1)[C@H]2C3C(=O)C[C@H](C=C3N=C(C2C(=O)OCCOC)C)C4=CCCC4)C               |
| ZINC0702709  | 2.16  | 7.95              | -66.68           | 0        | 8           | -1     | 422.413         | 7              | Cc1ccc(o1)C(=O)C2=C(C(=O)N([C@H]2c3ccc(c3)OC)OC)C4=CCCC4)O-                    |
| ZINC0702709  | 2.16  | 7.06              | -19.39           | 1        | 8           | 0      | 423.421         | 7              | Cc1ccc(o1)C(=O)C2=C(C(=O)N([C@H]2c3ccc(c3)OC)OC)C4=CCCC4)O                     |
| ZINC08440733 | 5.96  | 13.43             | -19.84           | 1        | 5           | 0      | 465.977         | 7              | Cc1ccc(cc1)[C@H]2C3=C(C[C@H](CC3=O)C4=CCCC4)C)NC(=C2C(=O)OCCOC)C               |
| ZINC08440733 | 5.91  | 0.43              | -9.37            | 0        | 5           | 0      | 465.977         | 7              | Cc1ccc(cc1)[C@H]2C(C(=NC3=C2C(=O)C[C@H](C3)C4=CCCC4)C)C)C(=O)OCCOC             |
| ZINC08440732 | 5.38  | 12.54             | -21.1            | 1        | 5           | 0      | 457.979         | 6              | Cc1c(ccs1)[C@H]2C3=C(CCC3=O)NC(=C2C(=O)OC)C0C4=CCCC4)C                         |
| ZINC08440732 | 5.5   | -1.79             | -10.43           | 0        | 5           | 0      | 457.979         | 6              | Cc1c(ccs1)[C@H]2C3C(=O)C[C@H](C=C3N=C(C2C(=O)OC)C)C0C4=CCCC4)C                 |
| ZINC08440731 | 5.53  | 11.65             | -19.58           | 1        | 6           | 0      | 447.531         | 7              | CCOC1ccc(cc1)[C@H]2C3=C(C[C@H](CC3=O)C4=CCCC4)OC)NC(=C2C(=O)OC)C               |
| ZINC08440731 | 5.64  | -0.3              | -9.03            | 0        | 6           | 0      | 447.531         | 7              | CCOC1ccc(cc1)[C@H]2C3C(=O)C[C@H](C=C3N=C(C2C(=O)OC)C)C4=CCCC4)OC               |
| ZINC08440730 | 5.53  | 12.16             | -25.98           | 1        | 6           | 0      | 447.531         | 7              | CCOC1ccc(cc1)[C@H]2C3=C(C[C@H](CC3=O)C4=CCCC4)OC)NC(=C2C(=O)OC)C               |
| ZINC08440730 | 5.64  | -0.26             | -11.23           | 0        | 6           | 0      | 447.531         | 7              | CCOC1ccc(cc1)[C@H]2C3C(=O)C[C@H](C=C3N=C(C2C(=O)OC)C)C4=CCCC4)OC               |
| ZINC0702710  | 2.16  | 8.32              | -66.81           | 0        | 8           | -1     | 422.413         | 7              | Cc1ccc(o1)C(=O)C2=C(C(=O)N([C@H]2c3ccc(c3)OC)OC)C4=CCCC4)O-                    |
| ZINC0702710  | 2.16  | 7.43              | -19.07           | 1        | 8           | 0      | 423.421         | 7              | Cc1ccc(o1)C(=O)C2=C(C(=O)N([C@H]2c3ccc(c3)OC)OC)C4=CCCC4)O                     |
| ZINC08440729 | 5.53  | 11.65             | -19.56           | 1        | 6           | 0      | 447.531         | 7              | CCOC1ccc(cc1)[C@H]2C3=C(C[C@H](CC3=O)C4=CCCC4)OC)NC(=C2C(=O)OC)C               |
| ZINC08440729 | 5.64  | -0.5              | -9.93            | 0        | 6           | 0      | 447.531         | 7              | CCOC1ccc(cc1)[C@H]2C3C(=O)C[C@H](C=C3N=C(C2C(=O)OC)C)C4=CCCC4)OC               |
| ZINC08440728 | 5.53  | 11.64             | -19.55           | 1        | 6           | 0      | 447.531         | 7              | CCOC1ccc(cc1)[C@H]2C3=C(C[C@H](CC3=O)C4=CCCC4)OC)NC(=C2C(=O)OC)C               |
| ZINC08440728 | 5.64  | -0.29             | -8.97            | 0        | 6           | 0      | 447.531         | 7              | CCOC1ccc(cc1)[C@H]2C3C(=O)C[C@H](C=C3N=C(C2C(=O)OC)C)C4=CCCC4)OC               |
| ZINC08440727 | 5.02  | 1.69              | -13.83           | 0        | 7           | 0      | 509.986         | 9              | CC1=NC2=C([C@H]([C1C(=O)OCCOC)C3=CCCC3)OC(=O)C)C[C@H]([C2]C4=CCCC4)C           |
| ZINC08440727 | 5.2   | 3.07              | -15.8            | 0        | 7           | 0      | 509.986         | 9              | CC(=O)Occc(cc1)[C@H]2[C@@H]3C(=NC(=O)C2C(=O)OCCOC)C[C@H](CC3=O)C4=CCCC4)C      |
| ZINC08440727 | 5.02  | 1.62              | -16.99           | 0        | 7           | 0      | 509.986         | 9              | CC1=C([C@H]([C@H]2C(=N1)C[C@H]([C2=O)C3=CC(=O)C3)C)C4=CCCC4)OC(=O)C)C(=O)OCCOC |
| ZINC0702699  | 4.93  | 12.76             | -48.41           | 0        | 6           | -1     | 468.529         | 7              | Cc1ccc(cc1)C(=O)C2=C(C(=O)N([C@H]2c3ccc(c3)OC4=CCCC4)C[C@H]5CCCCO5)O-          |
| ZINC0702699  | 5.38  | -0.66             | -28.59           | 1        | 6           | 0      | 465.537         | 6              | Cc1ccc(cc1)C=C2[C@H](N(C(=O)C2=O)C3=CC(=O)C3)C4=CCCC4)C[C@H]5CCCCO5)O          |
| ZINC0702699  | 4.35  | -0.38             | -23.32           | 0        | 6           | 0      | 465.537         | 7              | Cc1ccc(cc1)C(=O)C[C@H]2[C@H](N(C(=O)C2=O)C3=CC(=O)C3)C4=CCCC4)OC5=CCCC5        |
| ZINC08440726 | 5.02  | 1.61              | -14.58           | 0        | 7           | 0      | 509.986         | 9              | CC1=NC2=C([C@H]([C1C(=O)OCCOC)C3=CCCC3)OC(=O)C)C[C@H]([C2]C4=CCCC4)C           |
| ZINC08440726 | 5.2   | 1.67              | -16.32           | 0        | 7           | 0      | 509.986         | 9              | CC(=O)Occc(cc1)[C@H]2C3C(=NC(=O)C2C(=O)OCCOC)C[C@H](CC3=O)C4=CCCC4)C           |
| ZINC08440726 | 5.2   | 2.91              | -16.77           | 0        | 7           | 0      | 509.986         | 9              | CC(=O)Occc(cc1)[C@H]2[C@H]3C(=NC(=O)C2C(=O)OCCOC)C[C@H](CC3=O)C4=CCCC4)C       |
| ZINC08440726 | 5.02  | 1.71              | -19.29           | 0        | 7           | 0      | 509.986         | 9              | CC1=C([C@H]([C@H]2C(=N1)C[C@H]([C2=O)C3=CC(=O)C3)C)C4=CCCC4)OC(=O)C)C(=O)OCCOC |
| ZINC08440725 | 5.38  | 13.06             | -28.14           | 1        | 5           | 0      | 457.979         | 6              | Cc1c(ccs1)[C@H]2C3=C(CCC3=O)NC(=C2C(=O)OC)C0C4=CCCC4)C                         |
| ZINC08440725 | 5.5   | -1.91             | -12.99           | 0        | 5           | 0      | 457.979         | 6              | Cc1c(ccs1)[C@H]2C3C(=O)C[C@H](C=C3N=C(C2C(=O)OC)C)C0C4=CCCC4)C                 |
| ZINC08440724 | 5.02  | 1.6               | -13.95           | 0        | 7           | 0      | 509.986         | 9              | CC1=NC2=C([C@H]([C1C(=O)OCCOC)C3=CCCC3)OC(=O)C)C[C@H]([C2]C4=CCCC4)C           |
| ZINC08440724 | 5.2   | 1.69              | -14.55           | 0        | 7           | 0      | 509.986         | 9              | CC(=O)Occc(cc1)[C@H]2C3C(=NC(=O)C2C(=O)OCCOC)C[C@H](CC3=O)C4=CCCC4)C           |
| ZINC08440724 | 5.2   | 2.76              | -14.56           | 0        | 7           | 0      | 509.986         | 9              | CC(=O)Occc(cc1)[C@H]2[C@@H]3C(=NC(=O)C2C(=O)OCCOC)C[C@H](CC3=O)C4=CCCC4)C      |
| ZINC08440724 | 5.02  | 1.74              | -16.45           | 0        | 7           | 0      | 509.986         | 9              | CC1=C([C@H]([C@H]2C(=N1)C[C@H]([C2=O)C3=CC(=O)C3)C)C4=CCCC4)OC(=O)C)C(=O)OCCOC |
| ZINC0702700  | 4.93  | 12.62             | -48.84           | 0        | 6           | -1     | 468.529         | 7              | Cc1ccc(cc1)C(=O)C2=C(C(=O)N([C@H]2c3ccc(c3)OC4=CCCC4)C[C@H]5CCCCO5)O-          |
| ZINC0702700  | 5.38  | -0.05             | -28.93           | 1        | 6           | 0      | 465.537         | 6              | Cc1ccc(cc1)C=C2[C@H](N(C(=O)C2=O)C3=CC(=O)C3)C4=CCCC4)OC5=CCCC5                |
| ZINC0702700  | 4.35  | 0.2               | -26.62           | 0        | 6           | 0      | 465.537         | 7              | Cc1ccc(cc1)C(=O)C[C@H]2[C@H](N(C(=O)C2=O)C3=CC(=O)C3)C4=CCCC4)OC5=CCCC5        |
| ZINC08440723 | 5.02  | 1.71              | -13.87           | 0        | 7           | 0      | 509.986         | 9              | CC1=NC2=C([C@H]([C1C(=O)OCCOC)C3=CCCC3)OC(=O)C)C[C@H]([C2]C4=CCCC4)C           |
| ZINC08440723 | 5.2   | 2.94              | -17.57           | 0        | 7           | 0      | 509.986         | 9              | CC(=O)Occc(cc1)[C@H]2[C@H]3C(=NC(=O)C2C(=O)OCCOC)C[C@H](CC3=O)C4=CCCC4)C       |
| ZINC08440723 | 5.02  | 1.66              | -19.46           | 0        | 7           | 0      | 509.986         | 9              | CC1=C([C@H]([C@H]2C(=N1)C[C@H]([C2=O)C3=CC(=O)C3)C)C4=CCCC4)OC(=O)C)C(=O)OCCOC |
| ZINC08440723 | 5.2   | 1.77              | -15.76           | 0        | 7           | 0      | 509.986         | 9              | CC(=O)Occc(cc1)[C@H]2C3C(=NC(=O)C2C(=O)OCCOC)C[C@H](CC3=O)C4=CCCC4)C           |
| ZINC08440722 | 5.36  | 13.19             | -21.57           | 1        | 7           | 0      | 505.611         | 11             | CCOC1ccc(cc1OC)[C@H]2C3=C(C[C@H](CC3=O)C4=CCCC4)NC(=C2C(=O)OCCOC)C             |
| ZINC08440722 | 5.47  | -0.55             | -10.12           | 0        | 7           | 0      | 505.611         | 11             | CCOC1ccc(cc1OC)[C@H]2C3C(=O)C[C@H](C=C3N=C(C2C(=O)OCCOC)C)C4=CCCC4             |
| ZINC08440721 | 5.36  | 13.7              | -25.49           | 1        | 7           | 0      | 505.611         | 11             | CCOC1ccc(cc1OC)[C@H]2C3=C(C[C@H](CC3=O)C4=CCCC4)NC(=C2C(=O)OCCOC)C             |
| ZINC08440721 | 5.47  | -0.49             | -11.52           | 0        | 7           | 0      | 505.611         | 11             | CCOC1ccc(cc1OC)[C@H]2C3C(=O)C[C@H](C=C3N=C(C2C(=O)OCCOC)C)C4=CCCC4             |
| ZINC0702701  | 4.93  | 12.73             | -50.05           | 0        | 6           | -1     | 468.529         | 7              | Cc1ccc(cc1)C(=O)C2=C(C(=O)N([C@H]2c3ccc(c3)OC4=CCCC4)C[C@H]5CCCCO5)O-          |
| ZINC0702701  | 5.38  | -0.37             | -27.97           | 1        | 6           | 0      | 465.537         | 6              | Cc1ccc(cc1)C=C2[C@H](N(C(=O)C2=O)C3=CC(=O)C3)C4=CCCC4)OC5=CCCC5                |
| ZINC0702701  | 4.35  | -0.15             | -20.8            | 0        | 6           | 0      | 465.537         | 7              | Cc1ccc(cc1)C(=O)C[C@H]2[C@H](N(C(=O)C2=O)C3=CC(=O)C3)C4=CCCC4)OC5=CCCC5        |
| ZINC08440720 | 5.36  | 13.19             | -21.67           | 1        | 7           | 0      | 505.611         | 11             | CCOC1ccc(cc1OC)[C@H]2C3=C(C[C@H](CC3=O)C4=CCCC4)NC(=C2C(=O)OCCOC)C             |

**Supplementary Table S2:**  
**Detailed table of XP Docking using Schrodinger's Glide module**

| ZINC_ID      | sLogP | ApolarDesolvation | PolarDesolvation | H Donors | H Acceptors | Charge | MolecularWeight | RotatableBonds | SMILES                                                                               |
|--------------|-------|-------------------|------------------|----------|-------------|--------|-----------------|----------------|--------------------------------------------------------------------------------------|
| ZINC08440720 | 5.47  | -0.75             | -10.66           | 0        | 7           | 0      | 505.611         | 11             | CCOCc1ccc(cc1OC)[C@@H]2C3C(=O)C[C@@H](C=C3N=C(C2C(=O)O)CCOC)C4c4cccc4                |
| ZINC08440719 | 5.51  | 13.16             | -28.11           | 1        | 5           | 0      | 502.43          | 6              | Cc1c(ccs1)[C@@H]2C3=C(CCC3=O)NC(=C2C(=O)OC)C4O4cccc(c4)Br                            |
| ZINC08440718 | 5.63  | -2.53             | -12.86           | 0        | 5           | 0      | 502.43          | 6              | Cc1c(ccs1)[C@@H]2C3C(=O)CC=C3N=C(C2C(=O)OC)C4O4cccc(c4)Br                            |
| ZINC08440718 | 5.36  | 13.71             | -25.6            | 1        | 7           | 0      | 505.611         | 11             | CCOCc1ccc(cc1OC)[C@@H]2C3=C(C[C@@H](CC3=O)c4cccc4)NC(=C2C(=O)O)CCOC)C                |
| ZINC08440718 | 5.47  | -0.46             | -11.59           | 0        | 7           | 0      | 505.611         | 11             | CCOCc1ccc(cc1OC)[C@@H]2C3C(=O)C[C@@H](C=C3N=C(C2C(=O)O)CCOC)C4c4cccc4                |
| ZINC08440717 | 7.44  | 1.36              | -10.71           | 0        | 6           | 0      | 537.656         | 9              | CC1=NC2=C([C@@H](C1C(=O)OC(C)C)c3ccc(cc3)OCc4cccc4)C(=O)C[C@@H](C2)c5ccc(cc5)OC      |
| ZINC08440717 | 7.62  | 1.41              | -11.82           | 0        | 6           | 0      | 537.656         | 9              | CC(C)OC(=O)C1[C@@H](C2C(=NC1=C)C[C@@H](CC2=O)c3ccc(cc3)OC)c4ccc(cc4)OCc5cccc5        |
| ZINC08440717 | 7.44  | 1.29              | -14.41           | 0        | 6           | 0      | 537.656         | 9              | CC1=C([C@@H]([C@@H]2C(=N1)C[C@@H](CC2=O)c3ccc(cc3)OC)c4ccc(cc4)OCc5cccc5)C(=O)OC(C)C |
| ZINC00702702 | 4.93  | 12.27             | -47.96           | 0        | 6           | -1     | 468.529         | 7              | Cc1ccc(cc1)C(=O)C2=C(C(=O)N([C@@H]2c3ccc(cc3)O)c4cccc4)C[C@@H]5CCCCO5]O-             |
| ZINC00702702 | 5.38  | -0.6              | -29.18           | 1        | 6           | 0      | 469.537         | 6              | Cc1ccc(cc1)C(=O)C2=C(C(=O)N([C@@H]2c3ccc(cc3)O)c4cccc4)C[C@@H]5CCCCO5]O              |
| ZINC00702702 | 4.35  | -0.34             | -23.38           | 0        | 6           | 0      | 469.537         | 7              | Cc1ccc(cc1)C(=O)[C@@H]2[C@@H](N(C(=O)C2=O)C[C@@H]3CCCC3)c4cccc(c4)Oc5cccc5           |
| ZINC08440716 | 7.44  | 1.25              | -10.99           | 0        | 6           | 0      | 537.656         | 9              | CC1=NC2=C([C@@H](C1C(=O)OC(C)C)c3ccc(cc3)OCc4cccc4)C(=O)C[C@@H](C2)c5ccc(cc5)OC      |
| ZINC08440716 | 7.62  | 1.32              | -12.47           | 0        | 6           | 0      | 537.656         | 9              | CC(C)OC(=O)C1[C@@H](C2C(=NC1=C)C[C@@H](CC2=O)c3ccc(cc3)OC)c4ccc(cc4)OCc5cccc5        |
| ZINC08440716 | 7.62  | 2.67              | -18.42           | 0        | 6           | 0      | 537.656         | 9              | CC(C)OC(=O)C1[C@@H]([C@@H]2C(=NC1=C)C[C@@H](CC2=O)c3ccc(cc3)OC)c4ccc(cc4)OCc5cccc5   |
| ZINC08440716 | 7.44  | 1.36              | -14.53           | 0        | 6           | 0      | 537.656         | 9              | CC1=C([C@@H]([C@@H]2C(=N1)C[C@@H](CC2=O)c3ccc(cc3)OC)c4ccc(cc4)OCc5cccc5)C(=O)OC(C)C |
| ZINC08440715 | 7.44  | 1.28              | -10.93           | 0        | 6           | 0      | 537.656         | 9              | CC1=NC2=C([C@@H](C1C(=O)OC(C)C)c3ccc(cc3)OCc4cccc4)C(=O)C[C@@H](C2)c5ccc(cc5)OC      |
| ZINC08440715 | 7.62  | 1.41              | -12.21           | 0        | 6           | 0      | 537.656         | 9              | CC(C)OC(=O)C1[C@@H](C2C(=NC1=C)C[C@@H](CC2=O)c3ccc(cc3)OC)c4ccc(cc4)OCc5cccc5        |
| ZINC08440715 | 7.62  | 2.52              | -12.22           | 0        | 6           | 0      | 537.656         | 9              | CC(C)OC(=O)C1[C@@H]([C@@H]2C(=NC1=C)C[C@@H](CC2=O)c3ccc(cc3)OC)c4ccc(cc4)OCc5cccc5   |
| ZINC08440715 | 7.44  | 1.42              | -14.27           | 0        | 6           | 0      | 537.656         | 9              | CC1=C([C@@H]([C@@H]2C(=N1)C[C@@H](CC2=O)c3ccc(cc3)OC)c4ccc(cc4)OCc5cccc5)C(=O)OC(C)C |
| ZINC08440714 | 7.44  | 1.48              | -13.98           | 0        | 6           | 0      | 537.656         | 9              | CC1=NC2=C([C@@H](C1C(=O)OC(C)C)c3ccc(cc3)OCc4cccc4)C(=O)C[C@@H](C2)c5ccc(cc5)OC      |
| ZINC08440714 | 7.62  | 2.72              | -14.59           | 0        | 6           | 0      | 537.656         | 9              | CC(C)OC(=O)C1[C@@H]([C@@H]2C(=NC1=C)C[C@@H](CC2=O)c3ccc(cc3)OC)c4ccc(cc4)OCc5cccc5   |
| ZINC08440714 | 7.44  | 1.26              | -15.49           | 0        | 6           | 0      | 537.656         | 9              | CC1=C([C@@H]([C@@H]2C(=N1)C[C@@H](CC2=O)c3ccc(cc3)OC)c4ccc(cc4)OCc5cccc5)C(=O)OC(C)C |
| ZINC00702695 | 3.96  | 0.02              | -15.05           | 1        | 7           | 0      | 459.498         | 7              | Cc1ccc(cc1)C(=O)C2=C(C(=O)N([C@@H]2c3ccc(cc3)O)c4cccc4)C[C@@H]5CCCCO5]O              |
| ZINC00702695 | 3.38  | -0.19             | -21.62           | 0        | 7           | 0      | 459.498         | 7              | Cc1ccc(cc1)C(=O)[C@@H]2[C@@H](N(C(=O)C2=O)C[C@@H]3CCCC3)c4ccc(cc4)Oc5cccc5           |
| ZINC08440713 | 5.86  | 12.35             | -19.06           | 1        | 6           | 0      | 469.965         | 6              | Cc1c(ccc1C)OCc2ccc(o2)[C@@H]3C4=C(C(C4=O)C)NC(=C3C(=O)OC)C                           |
| ZINC08440713 | 5.97  | 0.45              | -10.01           | 0        | 6           | 0      | 469.965         | 6              | Cc1c(ccc1C)OCc2ccc(o2)[C@@H]3C4=C(C(C4=O)C)NC(=C3C(=O)OC)C(C)C                       |
| ZINC00702696 | 3.96  | 0.74              | -17.32           | 1        | 7           | 0      | 459.498         | 7              | Cc1ccc(cc1)C(=O)C2=C(C(=O)N([C@@H]2c3ccc(cc3)O)c4cccc4)C[C@@H]5CCCCO5]O              |
| ZINC00702696 | 3.38  | 0.68              | -24.75           | 0        | 7           | 0      | 459.498         | 7              | Cc1ccc(cc1)C(=O)[C@@H]2[C@@H](N(C(=O)C2=O)C[C@@H]3CCCC3)c4ccc(cc4)Oc5cccc5           |
| ZINC06148778 | 7.32  | 0.95              | -9.9             | 0        | 5           | 0      | 514.021         | 7              | CC1=NC2=C([C@@H](C1C(=O)OC)C)c3ccc(cc3)OCc4cccc4)C(=O)C[C@@H](C2)c5ccc(cc5)C1        |
| ZINC06148778 | 7.5   | 1.19              | -11.16           | 0        | 5           | 0      | 514.021         | 7              | CC(C)=O)C1[C@@H](C2C(=NC1=C)C[C@@H](CC2=O)c3ccc(cc3)OC)c4ccc(cc4)OCc5cccc5           |
| ZINC06148778 | 7.5   | 2.41              | -17.11           | 0        | 5           | 0      | 514.021         | 7              | CC(C)=O)C1[C@@H]([C@@H]2C(=NC1=C)C[C@@H](CC2=O)c3ccc(cc3)OC)c4ccc(cc4)OCc5cccc5      |
| ZINC06148778 | 7.32  | 1.06              | -13.64           | 0        | 5           | 0      | 514.021         | 7              | CC1=C([C@@H]([C@@H]2C(=N1)C[C@@H](CC2=O)c3ccc(cc3)OC)c4ccc(cc4)OCc5cccc5)C(=O)OC     |
| ZINC00702697 | 3.96  | 0.28              | -15.05           | 1        | 7           | 0      | 459.498         | 7              | Cc1ccc(cc1)C(=O)C2=C(C(=O)N([C@@H]2c3ccc(cc3)O)c4cccc4)C[C@@H]5CCCCO5]O              |
| ZINC00702697 | 3.38  | 0.09              | -20.83           | 0        | 7           | 0      | 459.498         | 7              | Cc1ccc(cc1)C(=O)[C@@H]2[C@@H](N(C(=O)C2=O)C[C@@H]3CCCC3)c4ccc(cc4)Oc5cccc5           |
| ZINC08440712 | 4.76  | -0.45             | -14.46           | 1        | 7           | 0      | 463.53          | 7              | CCOC(=O)C1[C@@H](C2=C(C(=O)N([C@@H]2c3ccc(cc3)O)C)N=C1C4c4ccc(cc4)OC)O               |
| ZINC08440712 | 4.76  | -0.81             | -16.7            | 1        | 7           | 0      | 463.53          | 7              | CCOC(=O)C1=C(N=C2C[C@@H](CC(=O)C2[C@@H]1c3ccc(cc3)OC)O)c4ccc(cc4)OC)C                |
| ZINC08440712 | 4.95  | -1.68             | -14.8            | 1        | 7           | 0      | 463.53          | 7              | CCOC(=O)C1[C@@H](C2C(=NC1=C)C[C@@H](CC2=O)c3ccc(cc3)OC)c4ccc(cc4)OC)O                |
| ZINC08440711 | 4.76  | -0.56             | -12              | 1        | 7           | 0      | 463.53          | 7              | CCOC(=O)C1[C@@H](C2=C(C(=O)N([C@@H]2c3ccc(cc3)O)C)N=C1C4c4ccc(cc4)OC)O               |
| ZINC08440711 | 4.76  | -0.64             | -14.81           | 1        | 7           | 0      | 463.53          | 7              | CCOC(=O)C1=C(N=C2C[C@@H](CC(=O)C2[C@@H]1c3ccc(cc3)OC)O)c4ccc(cc4)OC)C                |
| ZINC08440711 | 4.95  | -1.5              | -13.1            | 1        | 7           | 0      | 463.53          | 7              | CCOC(=O)C1[C@@H](C2C(=NC1=C)C[C@@H](CC2=O)c3ccc(cc3)OC)c4ccc(cc4)OC)O                |
| ZINC00702698 | 3.96  | -0.02             | -14.99           | 1        | 7           | 0      | 459.498         | 7              | Cc1ccc(cc1)C(=O)C2=C(C(=O)N([C@@H]2c3ccc(cc3)O)c4cccc4)C[C@@H]5CCCCO5]O              |
| ZINC00702698 | 3.38  | -0.21             | -21.37           | 0        | 7           | 0      | 459.498         | 7              | Cc1ccc(cc1)C(=O)[C@@H]2[C@@H](N(C(=O)C2=O)C[C@@H]3CCCC3)c4ccc(cc4)Oc5cccc5           |
| ZINC08440710 | 5.86  | 12.36             | -18.58           | 1        | 6           | 0      | 469.965         | 6              | Cc1c(ccc1C)OCc2ccc(o2)[C@@H]3C4=C(C(C4=O)C)NC(=C3C(=O)OC)C                           |
| ZINC08440710 | 5.97  | 0.1               | -9.62            | 0        | 6           | 0      | 469.965         | 6              | Cc1c(ccc1C)OCc2ccc(o2)[C@@H]3C4=C(C(C4=O)C)NC(=C3C(=O)OC)C(C)C                       |
| ZINC08440709 | 4.76  | -0.38             | -11.36           | 1        | 7           | 0      | 463.53          | 7              | CCOC(=O)C1[C@@H](C2=C(C(=O)N([C@@H]2c3ccc(cc3)O)C)N=C1C4c4ccc(cc4)OC)O               |
| ZINC08440709 | 4.76  | -0.65             | -15.2            | 1        | 7           | 0      | 463.53          | 7              | CCOC(=O)C1=C(N=C2C[C@@H](CC(=O)C2[C@@H]1c3ccc(cc3)OC)O)c4ccc(cc4)OC)C                |
| ZINC08440709 | 4.95  | -1.76             | -12.99           | 1        | 7           | 0      | 463.53          | 7              | CCOC(=O)C1[C@@H](C2C(=NC1=C)C[C@@H](CC2=O)c3ccc(cc3)OC)c4ccc(cc4)OC)O                |
| ZINC08440708 | 4.76  | -0.39             | -11.59           | 1        | 7           | 0      | 463.53          | 7              | CCOC(=O)C1[C@@H](C2=C(C(=O)N([C@@H]2c3ccc(cc3)O)C)N=C1C4c4ccc(cc4)OC)O               |
| ZINC08440708 | 4.76  | -0.59             | -15.44           | 1        | 7           | 0      | 463.53          | 7              | CCOC(=O)C1=C(N=C2C[C@@H](CC(=O)C2[C@@H]1c3ccc(cc3)OC)O)c4ccc(cc4)OC)C                |
| ZINC08440708 | 4.95  | -1.49             | -12.95           | 1        | 7           | 0      | 463.53          | 7              | CCOC(=O)C1[C@@H](C2C(=NC1=C)C[C@@H](CC2=O)c3ccc(cc3)OC)c4ccc(cc4)OC)O                |
| ZINC05918861 | 4.93  | 0.91              | -13.85           | 1        | 7           | 0      | 540.41          | 10             | CCCCOc1ccc(cc1OC)[C@@H]2C(=C(C(=O)N2C6c3ccc3)O)C(=O)c4ccc(cc4)Br                     |
| ZINC05918861 | 4.34  | 0.8               | -20.07           | 0        | 7           | 0      | 540.41          | 10             | CCCCOc1ccc(cc1OC)[C@@H]2[C@@H](C(=O)N2C6c3ccc3)C(=O)c4ccc(cc4)Br                     |
| ZINC08440707 | 7.68  | 0.34              | -8.04            | 0        | 4           | 0      | 510.461         | 5              | CC1=NC2=C([C@@H](C1C(=O)OC3CCCC3)c4ccc(cc4)C)C[C@@H](C2)c5cccc5                      |
| ZINC08440707 | 7.87  | 0.57              | -9.13            | 0        | 4           | 0      | 510.461         | 5              | C=C1C([C@@H]([C@@H]2C(=N1)C[C@@H](CC2=O)c3ccc(cc3)c4ccc(cc4)C)C)C(=O)OC5CCCCC5       |
| ZINC08440707 | 7.87  | 1.56              | -8.73            | 0        | 4           | 0      | 510.461         | 5              | C=C1C([C@@H]([C@@H]2C(=N1)C[C@@H](CC2=O)c3ccc(cc3)c4ccc(cc4)C)C)C(=O)OC5CCCCC5       |
| ZINC08440707 | 7.68  | 0.46              | -11.31           | 0        | 4           | 0      | 510.461         | 5              | CC1=C([C@@H]([C@@H]2C(=N1)C[C@@H](CC2=O)c3ccc(cc3)c4ccc(cc4)C)C)C(=O)OC5CCCCC5       |
| ZINC08440706 | 7.68  | 0.21              | -8.03            | 0        | 4           | 0      | 510.461         | 5              | CC1=NC2=C([C@@H](C1C(=O)OC3CCCC3)c4ccc(cc4)C)C[C@@H](C2)c5cccc5                      |
| ZINC08440706 | 7.87  | 0.3               | -8.76            | 0        | 4           | 0      | 510.461         | 5              | C=C1C([C@@H]([C@@H]2C(=N1)C[C@@H](CC2=O)c3ccc(cc3)c4ccc(cc4)C)C)C(=O)OC5CCCCC5       |
| ZINC08440706 | 7.87  | 1.62              | -16.48           | 0        | 4           | 0      | 510.461         | 5              | C=C1C([C@@H]([C@@H]2C(=N1)C[C@@H](CC2=O)c3ccc(cc3)c4ccc(cc4)C)C)C(=O)OC5CCCCC5       |
| ZINC08440706 | 7.68  | 0.35              | -11.54           | 0        | 4           | 0      | 510.461         | 5              | CC1=C([C@@H]([C@@H]2C(=N1)C[C@@H](CC2=O)c3ccc(cc3)c4ccc(cc4)C)C)C(=O)OC5CCCCC5       |
| ZINC08440705 | 7.68  | 0.37              | -8.15            | 0        | 4           | 0      | 510.461         | 5              | CC1=NC2=C([C@@H](C1C(=O)OC3CCCC3)c4ccc(cc4)C)C[C@@H](C2)c5cccc5                      |



Supplementary Table S2:

Detailed table of XP Docking using Schrodinger's Glide module

| ZINC_ID      | xLogP | ApolarDesolvation | PolarDesolvation | H Donors | H Acceptors | Charge | MolecularWeight | RotatableBonds | SMILES                                                                      |
|--------------|-------|-------------------|------------------|----------|-------------|--------|-----------------|----------------|-----------------------------------------------------------------------------|
| ZINC08440705 | 7.87  | 0.39              | -8.95            | 0        | 4           | 0      | 510.461         | 5              | C=C1C1([C@H](C2C=N1)C[C@@H](CC2=O)c3cccc3)c4cccc(c4C1)C(=O)OC5CCCCC5        |
| ZINC08440705 | 7.87  | 1.67              | -9.45            | 0        | 4           | 0      | 510.461         | 5              | C=C1C1([C@H](C2C=N1)C[C@@H](CC2=O)c3cccc3)c4cccc(c4C1)C(=O)OC5CCCCC5        |
| ZINC08440705 | 7.68  | 0.43              | -11.38           | 0        | 4           | 0      | 510.461         | 5              | CC1=C1([C@H](C2C=N1)C[C@@H](CC2=O)c3cccc3)c4cccc(c4C1)C(=O)OC5CCCCC5        |
| ZINC08440704 | 4.43  | 9.14              | -42.87           | 0        | 5           | -1     | 431.306         | 3              | COc1ccc(cc1OC)Br[C@@H]2C3=C(CCC3=O)N=C4C2=C(CCC4)O-                         |
| ZINC08440704 | 4.01  | -2.27             | -12.29           | 0        | 5           | 0      | 432.314         | 3              | COc1ccc(cc1OC)Br[C@@H]2C3C(=NC4=CCCC(=O)C24)CCCC3=O                         |
| ZINC08440703 | 7.68  | 0.23              | -7.76            | 0        | 4           | 0      | 510.461         | 5              | CC1=NC2=C([C@H](C1C(=O)OC3CCCC3)c4cccc(c4C1)C(=O)C[C@@H](C2)c5cccc5         |
| ZINC08440703 | 7.87  | 0.41              | -8.8             | 0        | 4           | 0      | 510.461         | 5              | C=C1C1([C@H](C2C=N1)C[C@@H](CC2=O)c3cccc3)c4cccc(c4C1)C(=O)OC5CCCCC5        |
| ZINC08440703 | 7.87  | 1.56              | -8.38            | 0        | 4           | 0      | 510.461         | 5              | C=C1C1([C@H](C2C=N1)C[C@@H](CC2=O)c3cccc3)c4cccc(c4C1)C(=O)OC5CCCCC5        |
| ZINC08440703 | 7.68  | 0.52              | -10.84           | 0        | 4           | 0      | 510.461         | 5              | CC1=C1([C@H](C2C=N1)C[C@@H](CC2=O)c3cccc3)c4cccc(c4C1)C(=O)OC5CCCCC5        |
| ZINC02063157 | 8.19  | 11.96             | -10.05           | 1        | 5           | 0      | 462.977         | 10             | CCCCCCC1ccc(cc1)C(=O)Nc2ccc3c(c2)nc(c3)c4ccc(cc4)Cl                         |
| ZINC05918802 | 4.93  | 0.62              | -15.29           | 1        | 7           | 0      | 540.41          | 10             | CCCCO1ccc(cc1OC)[C@@H]2C(=C(C(=O)N2C3CCCC3)O)C(=O)c4ccc(cc4)Br              |
| ZINC05918802 | 4.34  | 0.53              | -23.03           | 0        | 7           | 0      | 540.41          | 10             | CCCCO1ccc(cc1OC)[C@@H]2[C@@H](C(=O)C(=O)N2C3CCCC3)C(=O)c4ccc(cc4)Br         |
| ZINC02063155 | 6.41  | 2.06              | -8.02            | 0        | 3           | 0      | 439.627         | 3              | Cc1ccc(cc1)/C=C/C(=O)N2C3ccc(cc3-c4c(ss4=S)C2(C)C)OC                        |
| ZINC00702689 | 2.94  | 9.16              | -56.74           | 0        | 7           | -1     | 454.474         | 8              | CCOc1ccc(cc1OC)[C@@H]2C(=C(C(=O)N2C3CCCC3)O)C(=O)c4ccc(cc4)F                |
| ZINC00702689 | 2.36  | 8.95              | -18.71           | 0        | 7           | 0      | 455.482         | 8              | CCOc1ccc(cc1OC)[C@@H]2[C@@H](C(=O)C(=O)N2C3CCCC3)C(=O)c4ccc(cc4)F           |
| ZINC00702689 | 3.38  | 7.99              | -27.02           | 1        | 7           | 0      | 455.482         | 7              | CCOc1ccc(cc1OC)[C@@H]2C(=C(C3ccc(cc3)F)O)C(=O)C(=O)N2C3CCCC3                |
| ZINC00702690 | 2.94  | 8.98              | -58.25           | 0        | 7           | -1     | 454.474         | 8              | CCOc1ccc(cc1OC)[C@@H]2C(=C(C(=O)N2C3CCCC3)O)C(=O)c4ccc(cc4)F                |
| ZINC00702690 | 2.36  | 8.97              | -22.64           | 0        | 7           | 0      | 455.482         | 8              | CCOc1ccc(cc1OC)[C@@H]2[C@@H](C(=O)C(=O)N2C3CCCC3)C(=O)c4ccc(cc4)F           |
| ZINC00702690 | 3.38  | 7.97              | -32.2            | 1        | 7           | 0      | 455.482         | 7              | CCOc1ccc(cc1OC)[C@@H]2C(=C(c3ccc(cc3)F)O)C(=O)C(=O)N2C3CCCC3                |
| ZINC08440702 | 6.88  | 4.64              | -16.3            | 0        | 7           | 0      | 581.737         | 7              | Cc1ccc(cc1)/C=C/C(=O)N2C3ccc(cc3C=C4S(C(=S)4)C(=O)OC(C(=O)OC)C(=S)C2(C)C)OC |
| ZINC00702692 | 2.94  | 9.72              | -53.65           | 0        | 7           | -1     | 454.474         | 8              | CCOc1ccc(cc1OC)[C@@H]2C(=C(C(=O)N2C3CCCC3)O)C(=O)c4ccc(cc4)F                |
| ZINC00702692 | 3.38  | 7.47              | -31.95           | 1        | 7           | 0      | 455.482         | 7              | CCOc1ccc(cc1OC)[C@@H]2C(=C(c3ccc(cc3)F)O)C(=O)C(=O)N2C3CCCC3                |
| ZINC00702692 | 2.36  | 8.46              | -26.34           | 0        | 7           | 0      | 455.482         | 8              | CCOc1ccc(cc1OC)[C@@H]2[C@@H](C(=O)C(=O)N2C3CCCC3)C(=O)c4ccc(cc4)F           |
| ZINC02063153 | 6.41  | 2.07              | -10.68           | 0        | 3           | 0      | 439.627         | 3              | Cc1ccc(cc1)/C=C/C(=O)N2C3ccc(cc3-c4c(ss4=S)C2(C)C)OC                        |
| ZINC08440701 | 7.43  | 3.46              | -16.45           | 0        | 7           | 0      | 624.589         | 7              | CCOc1ccc2c1N(C(=S)C2=C3S(C(=S)3)C(=O)OC)C(=O)OC(C)C(=O)c4ccc(cc4)Cl         |
| ZINC08440700 | 7.85  | 3.77              | -15.05           | 0        | 6           | 0      | 608.59          | 5              | Cc1cc2c(cc1C)N(C(=S)C2=C3S(C(=S)3)C(=O)OC)C(=O)OC(C)C(=O)c4ccc(cc4)Cl       |
| ZINC08440699 | 3.34  | -0.93             | -64.19           | 0        | 7           | -1     | 444.891         | 6              | CCOc1ccc(cc1OC)C(=O)O)C(=O)N2C3C(=NC4=CCCC(=O)C24)CCCC3=O                   |
| ZINC08440699 | 3.5   | -2.14             | -59.94           | 0        | 7           | -1     | 444.891         | 6              | CCOc1ccc(cc1OC)C(=O)O)C(=O)N2C3C(=NC4=CCCC(=O)C24)CCCC3=O                   |
| ZINC00702685 | 4.48  | 11.77             | -45.12           | 0        | 8           | -1     | 522.618         | 12             | CCOc1ccc(cc1)C(=O)C2=C(C(=O)N(C@@H)2c3ccc(cc3)OC)OC(C)C(=O)C[C@@H]4CCCC4)O- |
| ZINC00702685 | 4.93  | -0.31             | -26.57           | 1        | 8           | 0      | 523.626         | 11             | CCOc1ccc(cc1)C(=O)C2=C(C(=O)N(C@@H)2c3ccc(cc3)OC)OC(C)C(=O)C[C@@H]4CCCC4)O- |
| ZINC00702685 | 3.9   | -0.02             | -19.45           | 0        | 8           | 0      | 523.626         | 12             | CCOc1ccc(cc1)C(=O)C2=C(C(=O)N(C@@H)2c3ccc(cc3)OC)OC(C)C(=O)C[C@@H]4CCCC4)O- |
| ZINC00666637 | 5.33  | -0.12             | -9.22            | 0        | 4           | 0      | 429.588         | 3              | CC1=C2C(=C(S)S2)-c3ccc(cc3N1C(=O)C4ccc(cc4)OC)OC                            |
| ZINC01810652 | 6.74  | 0.26              | -20.26           | 0        | 3           | 0      | 462.061         | 3              | CC1=C2C(=C1)N(C(C3C2=C(S)S3)C(C)C)C(=O)OC4ccc(cc4)Cl                        |
| ZINC00702686 | 4.48  | 11.72             | -46.58           | 0        | 8           | -1     | 522.618         | 12             | CCOc1ccc(cc1)C(=O)C2=C(C(=O)N(C@@H)2c3ccc(cc3)OC)OC(C)C(=O)C[C@@H]4CCCC4)O- |
| ZINC00702686 | 4.93  | 10.35             | -32.38           | 1        | 8           | 0      | 523.626         | 11             | CCOc1ccc(cc1)C(=O)C2=C(C(=O)N(C@@H)2c3ccc(cc3)OC)OC(C)C(=O)C[C@@H]4CCCC4)O- |
| ZINC00702686 | 3.9   | 11.39             | -22.57           | 0        | 8           | 0      | 523.626         | 12             | CCOc1ccc(cc1)C(=O)C2=C(C(=O)N(C@@H)2c3ccc(cc3)OC)OC(C)C(=O)C[C@@H]4CCCC4)O- |
| ZINC08440698 | 6.61  | 3.73              | -7.13            | 0        | 2           | 0      | 451.56          | 2              | Cc1ccc2c(c1)-c3c(ss3=S)C(N2C(=O)c4ccc(cc4)C(F)F)C                           |
| ZINC02063152 | 7.47  | 0.47              | -8.05            | 0        | 3           | 0      | 489.887         | 4              | CCOc1ccc2c1N(C(C3C2=C(S)S3)C(C)C)C(=O)c4ccc(cc4)c5cccc5                     |
| ZINC00702687 | 4.48  | 11.43             | -46.09           | 0        | 8           | -1     | 522.618         | 12             | CCOc1ccc(cc1)C(=O)C2=C(C(=O)N(C@@H)2c3ccc(cc3)OC)OC(C)C(=O)C[C@@H]4CCCC4)O- |
| ZINC00702687 | 4.92  | -0.03             | -28.17           | 1        | 8           | 0      | 523.626         | 11             | CCOc1ccc(cc1)C(=O)C2=C(C(=O)N(C@@H)2c3ccc(cc3)OC)OC(C)C(=O)C[C@@H]4CCCC4)O- |
| ZINC00702687 | 3.9   | 0.24              | -23.63           | 0        | 8           | 0      | 523.626         | 12             | CCOc1ccc(cc1)C(=O)C2=C(C(=O)N(C@@H)2c3ccc(cc3)OC)OC(C)C(=O)C[C@@H]4CCCC4)O- |
| ZINC02063151 | 6.96  | -0.33             | -6.49            | 0        | 3           | 0      | 482.479         | 3              | CCOc1ccc2c1N(C(C3C2=C(S)S3)C(C)C)C(=O)c4ccc(cc4)Cl                          |
| ZINC02063150 | 7.37  | -0.13             | -6.69            | 0        | 2           | 0      | 466.48          | 1              | Cc1cc-2c(cc1C)N(C(C3C2=C(S)S3)C(C)C)C(=O)c4ccc(cc4)Cl                       |
| ZINC02063149 | 6.57  | -0.69             | -6.29            | 0        | 2           | 0      | 438.426         | 1              | CC1=C2C(=C(S)S2)-c3cccc3N1C(=O)c4ccc(cc4)C1)C                               |
| ZINC02063148 | 7.16  | 2.13              | -18.62           | 0        | 3           | 0      | 500.761         | 3              | Cc1cc(c2c(c1)-c3c(ss3=S)C(N2C(=O)OC3C4Nc5cccc5s4)C(C)C                      |
| ZINC00702688 | 4.48  | 11.33             | -45.27           | 0        | 8           | -1     | 522.618         | 12             | CCOc1ccc(cc1)C(=O)C2=C(C(=O)N(C@@H)2c3ccc(cc3)OC)OC(C)C(=O)C[C@@H]4CCCC4)O- |
| ZINC00702688 | 4.93  | -0.67             | -31.67           | 1        | 8           | 0      | 523.626         | 11             | CCOc1ccc(cc1)C(=O)C2=C(C(=O)N(C@@H)2c3ccc(cc3)OC)OC(C)C(=O)C[C@@H]4CCCC4)O- |
| ZINC00702688 | 3.9   | -0.41             | -27.09           | 0        | 8           | 0      | 523.626         | 12             | CCOc1ccc(cc1)C(=O)C2=C(C(=O)N(C@@H)2c3ccc(cc3)OC)OC(C)C(=O)C[C@@H]4CCCC4)O- |
| ZINC01808753 | 7.47  | 3.22              | -12.96           | 0        | 4           | 0      | 523.745         | 6              | CCCC(=O)N1c2ccc(cc2/C=C/3S(C(=S)3)C(=O)OC)C4ccc(cc4)C(=S)C1(C)C             |
| ZINC02063145 | 9.74  | 4.99              | -11.59           | 0        | 4           | 0      | 549.67          | 6              | CC1=C(C(Nc2c1cc(c2)OC(=O)c3ccc(cc3)c4ccc(cc4)C(=O)S)ccc(cc5)c6cccc6)C(C)C   |
| ZINC00907019 | 6.26  | 4                 | -11.35           | 0        | 6           | 0      | 457.526         | 6              | CC1=CC(Nc2c1cc(c2)OC(=O)c3ccc(cc3)OC)C(=O)c4ccc(cc4)OC(C)C                  |
| ZINC08440694 | 6.82  | 3.45              | -14.47           | 0        | 6           | 0      | 559.775         | 7              | Cc1ccc2c(c1)N(C(C(=S)C2=C3S(C(=S)3)C(=O)OC)C(=O)OC(C)C(=O)CCC4CCCC4         |
| ZINC08440693 | 6.38  | 16.04             | -21.8            | 2        | 6           | 0      | 539.701         | 7              | Cc1ccc(cc1)S(C)C2ccc(cc2OC)[C@@H]3C4=C(CCC4=O)N(C(=O)C3)C(=O)Nc5c(ccn5)C    |
| ZINC08440693 | 6.5   | -2.5              | -14.24           | 1        | 6           | 0      | 539.701         | 7              | Cc1ccc(cc1)S(C)C2ccc(cc2OC)[C@@H]3C4=C(CCC4=O)N(C(=O)C3)C(=O)Nc5c(ccn5)C    |
| ZINC00702684 | 4.5   | 12.46             | -52.59           | 0        | 7           | -1     | 492.523         | 10             | CC(C)CCOc1ccc(cc1OC)[C@@H]2C(=C(C(=O)N2C3CCCC3)O)C(=O)c4ccc(cc4)F           |
| ZINC00702684 | 4.94  | 2.05              | -28.65           | 1        | 7           | 0      | 493.531         | 9              | CC(C)CCOc1ccc(cc1OC)[C@@H]2C(=C(c3ccc(cc3)F)O)C(=O)C(=O)N2C3CCCC3           |
| ZINC00702684 | 3.91  | 2.34              | -23.62           | 0        | 7           | 0      | 493.531         | 10             | CC(C)CCOc1ccc(cc1OC)[C@@H]2[C@@H](C(=O)C(=O)N2C3CCCC3)C(=O)c4ccc(cc4)F      |
| ZINC08440692 | 7.2   | 4.14              | -15.64           | 0        | 6           | 0      | 573.802         | 7              | Cc1cc2c(c1C)N(C(C(=S)C2=C3S(C(=S)3)C(=O)OC)C(=O)OC(C)C(=O)CCC4CCCC4         |
| ZINC02063143 | 6.33  | 1.34              | -9.94            | 0        | 3           | 0      | 447.691         | 5              | CCOc1ccc2c(c1)-c3c(ss3=S)C(N2C(=O)CCC4CCCC4)C(C)C                           |
| ZINC02063142 | 5.95  | 13.32             | -10.04           | 0        | 3           | 0      | 433.664         | 4              | CC1=C2C(=C(S)S2)-c3ccc(cc3N1C(=O)CCC4CCCC4)OC                               |
| ZINC02063141 | 6.72  | 0.29              | -16.41           | 0        | 2           | 0      | 431.692         | 3              | Cc1cc-2c(cc1C)N(C(C3C2=C(S)S3)C(C)C)C(=O)CCC4CCCC4                          |

Supplementary Table S2:

Detailed table of XP Docking using Schrodinger's Glide module

| ZINC_ID      | xLogP | ApolarDesolvation | PolarDesolvation | H Donors | H Acceptors | Charge | MolecularWeight | RotatableBonds | SMILES                                                                                                                                                       |
|--------------|-------|-------------------|------------------|----------|-------------|--------|-----------------|----------------|--------------------------------------------------------------------------------------------------------------------------------------------------------------|
| ZINC00702681 | 4.77  | 12.57             | -43.18           | 0        | 8           | -1     | 518.586         | 12             | CCOc1ccc(cc1)C(=O)C2=C(C(=O)N(C@H)2c3ccc(c(c3)OC)OCC(C)C)C4c4ccc4)O-1                                                                                        |
| ZINC00702681 | 5.21  | 1.67              | -28.74           | 1        | 8           | 0      | 519.594         | 11             | CCOc1ccc(cc1)C(=O)C2=C(C(=O)N(C@H)2c3ccc(c(c3)OC)OCC(C)C)C4c4ccc4)O-1                                                                                        |
| ZINC00702681 | 4.18  | 1.94              | -21.62           | 0        | 8           | 0      | 519.594         | 12             | CCOc1ccc(cc1)C(=O)C2=C(C(=O)N(C@H)2c3ccc(c(c3)OC)OCC(C)C)C4c4ccc4)O-1                                                                                        |
| ZINC08440689 | 6.38  | 16.01             | -20.87           | 2        | 6           | 0      | 539.701         | 7              | Cc1ccc(cc1)SCc2ccc(cc2)OC(C@H)3C4C(=O)CC=C4N=C(C3C(=O)Nc5ccc(ccn5)C)C                                                                                        |
| ZINC08440689 | 6.5   | -2.66             | -18.79           | 1        | 6           | 0      | 539.701         | 7              | Cc1ccc(cc1)SCc2ccc(cc2)OC(C@H)3C4C(=O)CC=C4N=C(C3C(=O)Nc5ccc(ccn5)C)C                                                                                        |
| ZINC05921188 | 4.77  | 11.72             | -59.72           | 0        | 8           | -1     | 518.586         | 12             | CCOc1ccc(cc1)C(=O)C2=C(C(=O)N(C@H)2c3ccc(c(c3)OC)OCC(C)C)C4c4ccc4)O-1                                                                                        |
| ZINC05921188 | 5.21  | 1.37              | -28.75           | 1        | 8           | 0      | 519.594         | 11             | CCOc1ccc(cc1)C(=O)C2=C(C(=O)N(C@H)2c3ccc(c(c3)OC)OCC(C)C)C4c4ccc4)O-1                                                                                        |
| ZINC05921188 | 4.18  | 1.6               | -22.42           | 0        | 8           | 0      | 519.594         | 12             | CCOc1ccc(cc1)C(=O)C2=C(C(=O)N(C@H)2c3ccc(c(c3)OC)OCC(C)C)C4c4ccc4)O-1                                                                                        |
| ZINC01826409 | 6.32  | 2.54              | -12.1            | 0        | 6           | 0      | 506.602         | 6              | C(C@H)1C(C@H)(c2ccccc2N1C(=O)c3ccc(cc3)OC)N(c4ccccc4)C(=O)c5ccc(cc5)OC                                                                                       |
| ZINC01826410 | 6.32  | 2.11              | -14.23           | 0        | 6           | 0      | 506.602         | 6              | C(C@H)1C(C@H)(c2ccccc2N1C(=O)c3ccc(cc3)OC)N(c4ccccc4)C(=O)c5ccc(cc5)OC                                                                                       |
| ZINC01826411 | 6.32  | 2.79              | -19.15           | 0        | 6           | 0      | 506.602         | 6              | C(C@H)1C(C@H)(c2ccccc2N1C(=O)c3ccc(cc3)OC)N(c4ccccc4)C(=O)c5ccc(cc5)OC                                                                                       |
| ZINC05918614 | 4.79  | 12.29             | -55.15           | 0        | 7           | -1     | 492.523         | 11             | CCCCOc1ccc(cc1)OC(C@H)2C(=O)N2C3ccc3)O-]C(=O)c4ccc(cc4)F                                                                                                     |
| ZINC05918614 | 5.23  | 2.15              | -28.65           | 1        | 7           | 0      | 493.531         | 10             | CCCCOc1ccc(cc1)OC(C@H)2C(=O)N2C3ccc3)O-]C(=O)c4ccc(cc4)F                                                                                                     |
| ZINC05918614 | 4.2   | 2.42              | -20.61           | 0        | 7           | 0      | 493.531         | 11             | CCCCOc1ccc(cc1)OC(C@H)2C(=O)N2C3ccc3)O-]C(=O)c4ccc(cc4)F                                                                                                     |
| ZINC01826412 | 6.32  | 2.59              | -14.49           | 0        | 6           | 0      | 506.602         | 6              | C(C@H)1C(C@H)(c2ccccc2N1C(=O)c3ccc(cc3)OC)N(c4ccccc4)C(=O)c5ccc(cc5)OC                                                                                       |
| ZINC02254907 | 6.53  | 3.92              | -8.85            | 0        | 4           | 0      | 482.53          | 4              | C(C@H)1C(C@H)(c2ccccc2N1C(=O)c3ccc(cc3)F)N(c4ccccc4)C(=O)c5ccc(cc5)F                                                                                         |
| ZINC02254908 | 6.53  | 3.64              | -10.3            | 0        | 4           | 0      | 482.53          | 4              | C(C@H)1C(C@H)(c2ccccc2N1C(=O)c3ccc(cc3)F)N(c4ccccc4)C(=O)c5ccc(cc5)F                                                                                         |
| ZINC05918609 | 4.79  | 11.83             | -56.45           | 0        | 7           | -1     | 492.523         | 11             | CCCCOc1ccc(cc1)OC(C@H)2C(=O)N2C3ccc3)O-]C(=O)c4ccc(cc4)F                                                                                                     |
| ZINC05918609 | 5.23  | 1.85              | -28.71           | 1        | 7           | 0      | 493.531         | 10             | CCCCOc1ccc(cc1)OC(C@H)2C(=O)N2C3ccc3)O-]C(=O)c4ccc(cc4)F                                                                                                     |
| ZINC05918609 | 4.2   | 2.15              | -23.6            | 0        | 7           | 0      | 493.531         | 11             | CCCCOc1ccc(cc1)OC(C@H)2C(=O)N2C3ccc3)O-]C(=O)c4ccc(cc4)F                                                                                                     |
| ZINC02254909 | 6.53  | 4.19              | -15.05           | 0        | 4           | 0      | 482.53          | 4              | C(C@H)1C(C@H)(c2ccccc2N1C(=O)c3ccc(cc3)F)N(c4ccccc4)C(=O)c5ccc(cc5)F                                                                                         |
| ZINC08440687 | 2.25  | -3.39             | -23.08           | 3        | 9           | 0      | 476.533         | 7              | Cc1ccc(cc1)NC(=O)C2(C@H)(C3=C(NC2=C)CC3)O-]C(=O)c4ccc(cc4)OC(=O)N                                                                                            |
| ZINC08440687 | 2.43  | -4.68             | -25.36           | 3        | 9           | 0      | 476.533         | 7              | Cc1ccc(cc1)NC(=O)C2(C@H)(C3=C(NC2=C)CC3)O-]C(=O)c4ccc(cc4)OC(=O)N                                                                                            |
| ZINC02254910 | 6.53  | 3.88              | -9.34            | 0        | 4           | 0      | 482.53          | 4              | C(C@H)1C(C@H)(c2ccccc2N1C(=O)c3ccc(cc3)F)N(c4ccccc4)C(=O)c5ccc(cc5)F                                                                                         |
| ZINC05918671 | 4.56  | 0.96              | -18.75           | 1        | 10          | 0      | 566.632         | 12             | CCCCOc1ccc(cc1)C(=O)C2=C(C(=O)N(C@H)2c3ccc(c(c3)OC)O)C4c4ccc(cc4)OC(=O)C                                                                                     |
| ZINC05918671 | 3.98  | 0.8               | -23.2            | 0        | 10          | 0      | 566.632         | 12             | CCCCOc1ccc(cc1)C(=O)C2=C(C(=O)N(C@H)2c3ccc(c(c3)OC)O)C4c4ccc(cc4)OC(=O)C                                                                                     |
| ZINC02063128 | 6.77  | -1.71             | -18.07           | 0        | 2           | 0      | 421.418         | 1              | Cc1ccc(cc1)c2c(c3nc(c3)S)c4ccc(cc4)C1(C)C(N2)C(C)C                                                                                                           |
| ZINC02063127 | 6.91  | -1.44             | -16.55           | 1        | 2           | 0      | 421.418         | 1              | Cc1ccc(cc1)c2c(c3nc(c3)S)c4ccc(cc4)C1(C)C(N2)C(C)C                                                                                                           |
| ZINC05918665 | 4.56  | 1.03              | -18.4            | 1        | 10          | 0      | 566.632         | 12             | CCCCOc1ccc(cc1)C(=O)C2=C(C(=O)N(C@H)2c3ccc(c(c3)OC)O)C4c4ccc(cc4)OC(=O)C                                                                                     |
| ZINC05918665 | 3.98  | 0.94              | -24.57           | 0        | 10          | 0      | 566.632         | 12             | CCCCOc1ccc(cc1)C(=O)C2=C(C(=O)N(C@H)2c3ccc(c(c3)OC)O)C4c4ccc(cc4)OC(=O)C                                                                                     |
| ZINC00666632 | 5.95  | -1.8              | -16.57           | 1        | 5           | 0      | 449.304         | 5              | COc1ccc(cc1)Br)c2nc3ccc(cc3)N(C(=O)C)/C=C/c4ccc4                                                                                                             |
| ZINC02063121 | 4.92  | -0.88             | -14.5            | 0        | 4           | 0      | 411.304         | 6              | c1ccc(cc1)N2CN(C2)C(=O)CCOCC3ccc(cc3)C)F                                                                                                                     |
| ZINC05918675 | 4.16  | 10.93             | -51.46           | 0        | 7           | -1     | 466.514         | 8              | CCCCOc1ccc(cc1)C(=O)C2=C(C(=O)N(C@H)2c3ccc(c(c3)F)c4nnf(s4)C)O-1                                                                                             |
| ZINC05918675 | 4.61  | 0.68              | -25.65           | 1        | 7           | 0      | 467.522         | 7              | CCCCOc1ccc(cc1)C(=O)C2=C(C(=O)N(C@H)2c3ccc(c(c3)F)c4nnf(s4)C)O-1                                                                                             |
| ZINC05918675 | 3.58  | 0.9               | -16.71           | 0        | 7           | 0      | 467.522         | 8              | CCCCOc1ccc(cc1)C(=O)C2=C(C(=O)N(C@H)2c3ccc(c(c3)F)c4nnf(s4)C)O-1                                                                                             |
| ZINC08440686 | 5.54  | -2.37             | -10.14           | 1        | 5           | 0      | 512.473         | 4              | CC1=NC2=C(C(=O)N(C@H)2C(=O)C)C3=CC(=O)N(C@H)2C(=O)C3=CC(=O)N(C@H)2C(=O)C3=CC(=O)N(C@H)2C(=O)C3=CC(=O)N(C@H)2C(=O)C3=CC(=O)N(C@H)2C(=O)C3=CC(=O)N(NC2=C)C(C)C |
| ZINC08440686 | 5.72  | -2.38             | -11.97           | 1        | 5           | 0      | 512.473         | 4              | CC1=NC2=C(C(=O)N(C@H)2C(=O)C)C3=CC(=O)N(C@H)2C(=O)C3=CC(=O)N(NC2=C)C(C)C                                                                                     |
| ZINC08440686 | 5.72  | -1.14             | -10.5            | 1        | 5           | 0      | 512.473         | 4              | CC1=NC2=C(C(=O)N(C@H)2C(=O)C)C3=CC(=O)N(C@H)2C(=O)C3=CC(=O)N(NC2=C)C(C)C                                                                                     |
| ZINC02063120 | 6.46  | -0.38             | -17.99           | 1        | 7           | 0      | 496.563         | 9              | COc1ccc(cc1)C(=O)C2=C(C(=O)N(C@H)2c3ccc(c(c3)F)c4nnf(s4)C)O-1                                                                                                |
| ZINC0847195  | 4.55  | -0.13             | -15.15           | 1        | 7           | 0      | 430.526         | 10             | CCOc1ccc(cc1)C(=O)C2=C(C(=O)N(C@H)2c3ccc(c(c3)OC)O)C4c4ccc(cc4)OC                                                                                            |
| ZINC00666601 | 5.8   | 1.25              | -11.75           | 1        | 6           | 0      | 428.879         | 4              | Cc1ccc(cc1)n2nc3ccc(cc3)N(C(=O)C)C4c4ccc(cc4)C5ccc(cc5)C                                                                                                     |
| ZINC02063119 | 7.05  | -1.17             | -9.21            | 1        | 5           | 0      | 449.293         | 4              | c1ccc(cc1)c2ccc(cc2)C(=O)N3ccc4c(c3)nc(c4)C5ccc(cc5)C1                                                                                                       |
| ZINC00666597 | 5.06  | 1.94              | -17.94           | 1        | 9           | 0      | 439.431         | 5              | Cc1ccc(cc1)n2nc3ccc(cc3)N(C(=O)C)C4c4ccc(cc4)C5ccc(cc5)C1                                                                                                    |
| ZINC05918668 | 4.16  | 10.95             | -51.53           | 0        | 7           | -1     | 466.514         | 8              | CCCCOc1ccc(cc1)C(=O)C2=C(C(=O)N(C@H)2c3ccc(c(c3)F)c4nnf(s4)C)O-1                                                                                             |
| ZINC05918668 | 4.61  | 0.66              | -25.99           | 1        | 7           | 0      | 467.522         | 7              | CCCCOc1ccc(cc1)C(=O)C2=C(C(=O)N(C@H)2c3ccc(c(c3)F)c4nnf(s4)C)O-1                                                                                             |
| ZINC05918668 | 3.58  | 0.96              | -18.34           | 0        | 7           | 0      | 467.522         | 8              | CCCCOc1ccc(cc1)C(=O)C2=C(C(=O)N(C@H)2c3ccc(c(c3)F)c4nnf(s4)C)O-1                                                                                             |
| ZINC08440684 | 8.08  | 2.95              | -11.37           | 1        | 6           | 0      | 501.671         | 7              | CC(C)C(C)C1ccc(cc1)OC(C)C1n2c3ccc(cc3)N2C4c4ccc(cc4)N(C)C)OC                                                                                                 |
| ZINC08440683 | 9.14  | 1.88              | -8.11            | 1        | 3           | 0      | 477.446         | 4              | CC(C)C(C)C1ccc(cc1)OC(C)C1n2c3ccc(cc3)N2C4c4ccc(cc4)Br                                                                                                       |
| ZINC00666595 | 5.29  | -0.54             | -16.42           | 1        | 5           | 0      | 461.612         | 5              | Cc1ccc(cc1)NC(=O)C2=C(C(=O)N(C@H)2c3ccc(c(c3)OC)O)C4c4ccc(cc4)OC                                                                                             |
| ZINC00632059 | 4.63  | -0.69             | -17.16           | 1        | 5           | 0      | 451.548         | 5              | Cc1ccc(cc1)n2c(c=O)c3c4c3c3nc2S(=O)Nc5ccc(cc5)F)CCC4                                                                                                         |
| ZINC02063118 | 5.27  | -2.19             | -16.5            | 1        | 5           | 0      | 512.454         | 5              | Cc1ccc(cc1)n2c(c=O)c3c4c3c3nc2S(=O)Nc5ccc(cc5)F)CCC4                                                                                                         |
| ZINC08440682 | 5.54  | 12.36             | -19.11           | 1        | 5           | 0      | 512.473         | 4              | CC1=C(C(=O)N(C@H)2C(=O)N1)CC(C2=O)C(C)C3ccc(cc3)SC(C)C(=O)Nc4ccc(cc4)Br                                                                                      |
| ZINC08440682 | 5.54  | -1.64             | -13.91           | 1        | 5           | 0      | 512.473         | 4              | CC1=C(C(=O)N(C@H)2C(=O)N1)CC(C2=O)C(C)C3ccc(cc3)SC(C)C(=O)Nc4ccc(cc4)Br                                                                                      |
| ZINC08440682 | 5.72  | -1.95             | -11.58           | 1        | 5           | 0      | 512.473         | 4              | CC1(C2=NC(=O)C(C)C@H(C2)C(=O)C)C3ccc(cc3)SC(C)C(=O)Nc4ccc(cc4)Br                                                                                             |
| ZINC08440682 | 5.72  | -1.13             | -12.08           | 1        | 5           | 0      | 512.473         | 4              | CC1(C2=NC(=O)C(C)C@H(C2)C(=O)C)C3ccc(cc3)SC(C)C(=O)Nc4ccc(cc4)Br                                                                                             |
| ZINC00702673 | 3.1   | 10.72             | -37.76           | 0        | 8           | -1     | 480.497         | 7              | CCOC(=O)c1c(nc(s1)N2)C@H(C=C(C2=O)O-)]C(=O)c3ccc(cc3)F)C4c4ccc4)C                                                                                            |
| ZINC00702673 | 3.55  | 0.19              | -33.1            | 1        | 8           | 0      | 481.505         | 6              | CCOC(=O)c1c(nc(s1)N2)C@H(C=C(C2=O)O-)]C(=O)c3ccc(cc3)F)C4c4ccc4)C                                                                                            |
| ZINC00702673 | 2.52  | 0.39              | -25.33           | 0        | 8           | 0      | 481.505         | 7              | CCOC(=O)c1c(nc(s1)N2)C@H(C(=O)C2=O)C(=O)c3ccc(cc3)F)C4c4ccc4)C                                                                                               |
| ZINC08440681 | 4.91  | -1.12             | -16.63           | 1        | 5           | 0      | 447.585         | 5              | Cc1ccc(cc1)NC(=O)C2=C(C(=O)N(C@H)2c3ccc(c(c3)OC)O)C4c4ccc(cc4)OC                                                                                             |
| ZINC08440680 | 7.89  | -0.58             | -14.67           | 0        | 4           | 0      | 557.549         | 5              | c1ccc2c(c1)cccc2n3c(=O)c4c5c(sc4n3c3CC(=O)c6cc(sc6)C)CCCC5                                                                                                   |
| ZINC08440679 | 2.28  | -1.58             | -58.95           | 2        | 8           | 1      | 481.318         | 5              | Cn1ccc(c1)C(=O)Nc2nc3ccc3n2C(NH)4CCCC4                                                                                                                       |

Supplementary Table S2:

Detailed table of XP Docking using Schrodinger's Glide module

| ZINC_ID      | sLogP | ApolarDesolvation | PolarDesolvation | H Donors | H Acceptors | Charge | MolecularWeight | RotatableBonds | SMILES                                                                            |
|--------------|-------|-------------------|------------------|----------|-------------|--------|-----------------|----------------|-----------------------------------------------------------------------------------|
| ZINC08440678 | 7.18  | -0.05             | -17.57           | 1        | 5           | 0      | 525.699         | 5              | Cc1ccc(c(c1)NC(=O)CSc2nc3c(c4c(s3)CCCC4)c(=O)n2c5cccc6c5cccc6)C                   |
| ZINC00702674 | 3.1   | 10.22             | -60.18           | 0        | 8           | -1     | 480.497         | 7              | CCOC(=O)c1c[nC(s1)N2]C@H(C=C(C2=O)O-)]C(=O)c3ccc(c(c3)F)C4Cccnc4)C                |
| ZINC02063116 | 7.16  | -1.67             | -17.36           | 1        | 5           | 0      | 576.541         | 5              | c1ccc2c(c1)cccc2n3c(=O)c4c5c(sc4n3S(=O)(=O)Nc6ccc(cc6)Br)CCCC5                    |
| ZINC08440677 | 3.9   | 0.21              | -16.77           | 1        | 8           | 0      | 475.545         | 7              | Cc1ccnc1NC(=O)C2[C@@H]([C@H]([C3=C(CCC3=O)N=C2])C4Ccc(c(c4)COC(=O)C)OC            |
| ZINC08440677 | 3.9   | 0.13              | -21.68           | 1        | 8           | 0      | 475.545         | 7              | Cc1ccnc1NC(=O)C2=C(N=C3CCCC(=O)C3)C@H]2c4ccc(c(c4)COC(=O)C)OC                     |
| ZINC08440677 | 4.08  | -0.98             | -19.12           | 1        | 8           | 0      | 475.545         | 7              | Cc1ccnc1NC(=O)C2[C@@H]([C3=C(NC2=C)CCCC3=O])c4ccc(c(c4)COC(=O)C)OC                |
| ZINC08440676 | 3.5   | 9.69              | -54.99           | 0        | 6           | -1     | 424.448         | 10             | COCCCN1[C@@H](C=C(C1=O)O-)]C(=O)c2ccc(cc2)OCC=C)c3ccc(cc3)F                       |
| ZINC08440676 | 3.94  | 0.77              | -28.28           | 1        | 6           | 0      | 425.456         | 9              | COCCCN1[C@@H](C=C(C2ccc(cc2)OCC=C)O)C(=O)C1=O)c3ccc(cc3)F                         |
| ZINC08440676 | 2.91  | 1.06              | -22.17           | 0        | 6           | 0      | 425.456         | 10             | COCCCN1[C@@H]([C@H]([C(=O)C1=O])C(=O)c2ccc(cc2)OCC=C)c3ccc(cc3)F                  |
| ZINC02063115 | 6.8   | -0.59             | -17.63           | 1        | 5           | 0      | 511.672         | 5              | Cc1ccc(cc1)NC(=O)CSc2nc3c(c4c(s3)CCCC4)c(=O)n2c5cccc6c5cccc6                      |
| ZINC08440675 | 8.43  | 0.92              | -15.95           | 1        | 4           | 0      | 559.713         | 8              | Cc1ccc2c(c1)c(c[n2]C[C@@H](Cn3cncf3c4cccc4)c5cccc5)O)c6cccc6)7cccc7               |
| ZINC08440673 | 3.5   | 9.64              | -55.16           | 0        | 6           | -1     | 424.448         | 10             | COCCCN1[C@@H]([C(=O)C1=O])O-)]C(=O)c2ccc(cc2)OCC=C)c3ccc(cc3)F                    |
| ZINC08440673 | 3.94  | 0.49              | -30.3            | 1        | 6           | 0      | 425.456         | 9              | COCCCN1[C@@H]([C(=O)C2ccc(cc2)OCC=C)O)C(=O)C1=O)c3ccc(cc3)F                       |
| ZINC08440673 | 2.91  | 0.75              | -25.79           | 0        | 6           | 0      | 425.456         | 10             | COCCCN1[C@@H]([C@@H]([C(=O)C1=O])C(=O)c2ccc(cc2)OCC=C)c3ccc(cc3)F                 |
| ZINC02063114 | 6.91  | 2.15              | -16.9            | 0        | 3           | 0      | 415.901         | 3              | c1ccc(cc1)c2ccc(cc2)c3csc(n3)c4ccc5ccc(cc5)O4=O)Cl                                |
| ZINC09057742 | 8.49  | 18.57             | -13.32           | 1        | 3           | 0      | 476.579         | 6              | c1ccc(cc1)c2ccc(cc2)c3[nH]c(c(n3)c4cccc4)c5ccc(cc5)C(=O)c6cccc6                   |
| ZINC09057742 | 8.49  | 18.58             | -12.3            | 1        | 3           | 0      | 476.579         | 6              | c1ccc(cc1)c2ccc(cc2)c3[nH]c(c(n3)c4cccc4)C(=O)c5cccc5)c6cccc6                     |
| ZINC09057742 | 8.49  | 19                | -37.99           | 2        | 3           | 1      | 477.587         | 6              | c1ccc(cc1)c2ccc(cc2)c3[nH]c(c(nH+3)c4cccc4)c5ccc(cc5)C(=O)c6cccc6                 |
| ZINC09057742 | 8.49  | 19.01             | -38.22           | 2        | 3           | 1      | 477.587         | 6              | c1ccc(cc1)c2ccc(cc2)c3[nH]c(c(nH+3)c4cccc4)C(=O)c5cccc5)c6cccc6                   |
| ZINC02063104 | 5.78  | 2.53              | -14.68           | 0        | 5           | 0      | 519.409         | 4              | c1ccc(cc1)N2C(=O)C=Cc3ccc(cc3)c4ccc(cc4)Cl)C(=O)N(C2=5)c5cccc5                    |
| ZINC08440666 | 2.8   | -6.64             | -22.92           | 2        | 7           | 0      | 462.593         | 6              | Cc1ccccc1OCC(=O)Nc2c(c3c2)CCCC3[C@N]C@H]4CCS(=O)O)C4                              |
| ZINC08440665 | 8.04  | 2.75              | -20.27           | 0        | 8           | 0      | 623.525         | 8              | CCOC(=O)C1=C(N=C2n(c(f=O)/e=C3ccc(cc3)c4ccc(cc4)Br)C)/s2)]C@H]1c5ccc(cc5)O)C)OC   |
| ZINC08440664 | 8.04  | 2.99              | -17.88           | 0        | 8           | 0      | 623.525         | 8              | CCOC(=O)C1=C(N=C2n(c(f=O)/e=C3ccc(cc3)c4ccc(cc4)Br)C)/s2)]C@H]1c5ccc(cc5)O)C)OC   |
| ZINC08440661 | 2.8   | -6.66             | -22.71           | 2        | 7           | 0      | 462.593         | 6              | Cc1ccccc1OCC(=O)Nc2c(c3c2)CCCC3[C@N]C@H]4CCS(=O)O)C4                              |
| ZINC08440659 | 6.72  | 2.8               | -14.85           | 0        | 8           | 0      | 636.568         | 8              | CCOC(=O)C1=C(N=C2n(c(f=O)/e=C3ccc(cc3)c4ccc(cc4)Br)C)/s2)]C@H]1c5ccc(cc5)O)C)OC   |
| ZINC08440658 | 6.72  | 2.8               | -14.76           | 0        | 8           | 0      | 636.568         | 8              | CCOC(=O)C1=C(N=C2n(c(f=O)/e=C3ccc(cc3)c4ccc(cc4)Br)C)/s2)]C@H]1c5ccc(cc5)O)C)OC   |
| ZINC08440657 | 6.36  | 3.88              | -15.44           | 0        | 8           | 0      | 571.699         | 8              | CCOC(=O)C1=C(N=C2n(c(f=O)/e=C3ccc(cc3)c4ccc(cc4)Br)C)/s2)]C@H]1c5ccc(cc5)O)C)OC   |
| ZINC08440656 | 3.71  | -7.29             | -19.26           | 2        | 6           | 0      | 487.43          | 4              | c1ccc(cc1)C1=C(N=C2n(c(f=O)/e=C3ccc(cc3)c4ccc(cc4)Br)C)/s2)]C@H]1c5ccc(cc5)O)C)OC |
| ZINC08440655 | 6.36  | 3.88              | -15.31           | 0        | 8           | 0      | 571.699         | 8              | CCOC(=O)C1=C(N=C2n(c(f=O)/e=C3ccc(cc3)c4ccc(cc4)Br)C)/s2)]C@H]1c5ccc(cc5)O)C)OC   |
| ZINC08440654 | 3.71  | -7.32             | -19.39           | 2        | 6           | 0      | 487.43          | 4              | c1ccc(cc1)C1=C(N=C2n(c(f=O)/e=C3ccc(cc3)c4ccc(cc4)Br)C)/s2)]C@H]1c5ccc(cc5)O)C)OC |
| ZINC08440653 | 7.95  | 2.92              | -14.66           | 0        | 8           | 0      | 617.727         | 7              | CCOC(=O)C1=C(N=C2n(c(f=O)/e=C3ccc(cc3)c4ccc(cc4)Br)C)/s2)]C@H]1c6ccc7c(c6)OC)OC   |
| ZINC08440652 | 7.95  | 3.09              | -14.48           | 0        | 8           | 0      | 617.727         | 7              | CCOC(=O)C1=C(N=C2n(c(f=O)/e=C3ccc(cc3)c4ccc(cc4)Br)C)/s2)]C@H]1c6ccc7c(c6)OC)OC   |
| ZINC08440651 | 5.68  | 16.37             | -24.87           | 2        | 7           | 0      | 564.089         | 5              | Cc1ccnc1NC(=O)C2=C(NC3=C([C@@H]2c4fnn(c4Cl)cccc5)C)C(=O)C[C@@H]([C3]1cccc6)C      |
| ZINC08440651 | 5.82  | -0.25             | -17              | 1        | 7           | 0      | 564.089         | 5              | Cc1ccnc1NC(=O)C2[C@@H]([C3=C(NC2=C)C]C@H]([C3=O])c4cccc4)c5fnn(c5)Cl)c6cccc6)C    |
| ZINC08440650 | 6.83  | 2.23              | -13.3            | 0        | 8           | 0      | 576.074         | 6              | CCOC(=O)C1=C(N=C2n(c(f=O)/e=C3ccc(cc3)c4ccc(cc4)Br)C)/s2)]C@H]1c5ccc(cc5)O)C)OC   |
| ZINC08440649 | 4.02  | 0.86              | -22.98           | 1        | 8           | 0      | 535.568         | 12             | COCCCN1[C@@H]([C(=O)C1=O])C(=O)c2ccc(cc2)F)OC)c3ccc(cc3)OC)c4cccc4                |
| ZINC08440649 | 3.44  | 0.71              | -29.45           | 0        | 8           | 0      | 535.568         | 12             | COCCCN1[C@@H]([C@@H]([C(=O)C1=O])C(=O)c2ccc(cc2)F)OC)c3ccc(cc3)OC)c4cccc4         |
| ZINC08440648 | 6.83  | 2.4               | -13.15           | 0        | 8           | 0      | 576.074         | 6              | CCOC(=O)C1=C(N=C2n(c(f=O)/e=C3ccc(cc3)c4ccc(cc4)Br)C)/s2)]C@H]1c5ccc(cc5)O)C)OC   |
| ZINC08440647 | 7.17  | 2.7               | -12.96           | 0        | 7           | 0      | 619.585         | 7              | CCOC(=O)C1=C(N=C2n(c(f=O)/e=C3ccc(cc3)c4ccc(cc4)Br)C)/s2)]C@H]1c5ccc(cc5)N(C)C)C  |
| ZINC08440646 | 7.17  | 2.54              | -12.83           | 0        | 7           | 0      | 619.585         | 7              | CCOC(=O)C1=C(N=C2n(c(f=O)/e=C3ccc(cc3)c4ccc(cc4)Br)C)/s2)]C@H]1c5ccc(cc5)N(C)C)C  |
| ZINC08440645 | 4.02  | 1.33              | -20.71           | 1        | 8           | 0      | 535.568         | 12             | COCCCN1[C@@H]([C(=O)C1=O])C(=O)c2ccc(cc2)F)OC)c3ccc(cc3)OC)c4cccc4                |
| ZINC08440645 | 3.44  | 1.16              | -26.58           | 0        | 8           | 0      | 535.568         | 12             | COCCCN1[C@@H]([C@@H]([C(=O)C1=O])C(=O)c2ccc(cc2)F)OC)c3ccc(cc3)OC)c4cccc4         |
| ZINC08440644 | 6.53  | 4.12              | -13.62           | 0        | 7           | 0      | 558.679         | 7              | CCOC(=O)C1=C(N=C2n(c(f=O)/e=C3ccc(cc3)c4ccc(cc4)Br)C)/s2)]C@H]1c5ccc(cc5)N(C)C)C  |
| ZINC08440643 | 4.11  | 0.28              | -63.67           | 0        | 7           | -1     | 545.45          | 6              | CCOc1cc(c(cc1OCC(=O)O)O-)]Br[C@@H]2C3C(=NC4=C2C(=O)CC(C4))C)C)CC(C3=O)C)C         |
| ZINC08440643 | 4.27  | -0.67             | -59.12           | 0        | 7           | -1     | 545.45          | 6              | CCOc1cc(c(cc1OCC(=O)O)O-)]Br[C@@H]2C3C(=NC4=C2C(=O)CC(C4))C)C)CC(C3=O)C)C         |
| ZINC08440642 | 6.53  | 3.95              | -13.34           | 0        | 7           | 0      | 558.679         | 7              | CCOC(=O)C1=C(N=C2n(c(f=O)/e=C3ccc(cc3)c4ccc(cc4)Br)C)/s2)]C@H]1c5ccc(cc5)N(C)C)C  |
| ZINC08440641 | 7.04  | 3.31              | -13.1            | 0        | 7           | 0      | 575.134         | 7              | CCOC(=O)C1=C(N=C2n(c(f=O)/e=C3ccc(cc3)c4ccc(cc4)Br)C)/s2)]C@H]1c5ccc(cc5)N(C)C)C  |
| ZINC08440640 | 2.63  | -0.91             | -63.66           | 3        | 9           | 1      | 550.426         | 10             | C[NH+](C)CCCN1[C@@H]([C(=O)C1=O])C(=O)c2ccc(cc2)O)C)c3ccc(cc3)Br)O)OC             |
| ZINC08440640 | 2.05  | -1.06             | -73.58           | 2        | 9           | 1      | 550.426         | 10             | C[NH+](C)CCCN1[C@@H]([C@@H]([C(=O)C1=O])C(=O)c2ccc(cc2)O)C)c3ccc(cc3)Br)O)OC      |
| ZINC08440639 | 7.04  | 3.14              | -12.69           | 0        | 7           | 0      | 575.134         | 7              | CCOC(=O)C1=C(N=C2n(c(f=O)/e=C3ccc(cc3)c4ccc(cc4)Br)C)/s2)]C@H]1c5ccc(cc5)N(C)C)C  |
| ZINC08440638 | 6.43  | 3.97              | -12.33           | 0        | 6           | 0      | 515.61          | 6              | CCOC(=O)C1=C(N=C2n(c(f=O)/e=C3ccc(cc3)c4ccc(cc4)Br)C)/s2)]C@H]1c5ccc(cc5)C        |
| ZINC08440637 | 6.43  | 4.05              | -12.48           | 0        | 6           | 0      | 515.61          | 6              | CCOC(=O)C1=C(N=C2n(c(f=O)/e=C3ccc(cc3)c4ccc(cc4)Br)C)/s2)]C@H]1c5ccc(cc5)C        |
| ZINC08440636 | 7.73  | 3.19              | -11.72           | 0        | 4           | 0      | 502.397         | 6              | CCOc1ccc(cc1)N2C/C=C/C3ccc(cc3)c4ccc(cc4)Cl)C1/C2=O)c5cccc5                       |
| ZINC08440635 | 8.16  | 3.02              | -12.27           | 0        | 3           | 0      | 492.789         | 4              | c1ccc(cc1)C2=C/C=C/C3ccc(cc3)c4ccc(cc4)Cl)C1/C2=O)c5cccc5                         |
| ZINC08440634 | 2.63  | -1.11             | -50.69           | 3        | 9           | 1      | 550.426         | 10             | C[NH+](C)CCCN1[C@@H]([C(=O)C1=O])C(=O)c2ccc(cc2)O)C)c3ccc(cc3)Br)O)OC             |
| ZINC08440634 | 2.05  | -1.26             | -59.72           | 2        | 9           | 1      | 550.426         | 10             | C[NH+](C)CCCN1[C@@H]([C@@H]([C(=O)C1=O])C(=O)c2ccc(cc2)O)C)c3ccc(cc3)Br)O)OC      |
| ZINC08440632 | 9.26  | 3.08              | -18.64           | 0        | 7           | 0      | 619.526         | 7              | CCOC(=O)C1=C(N=C2n(c(f=O)/e=C3ccc(cc3)c4ccc(cc4)Br)C)/s2)]C@H]1c5ccc(cc5)O)C)OC   |
| ZINC08440631 | 9.26  | 3.09              | -18.1            | 0        | 7           | 0      | 619.526         | 7              | CCOC(=O)C1=C(N=C2n(c(f=O)/e=C3ccc(cc3)c4ccc(cc4)Br)C)/s2)]C@H]1c5ccc(cc5)O)C)OC   |
| ZINC05919169 | 3.12  | 10.01             | -63.49           | 0        | 8           | -1     | 487.532         | 10             | CCOC1ccc(cc1)[C@@H]2C(=C(C(=O)N2C3ccc3)O-)]C(=O)c4ccc(cc4)OC)OC                   |
| ZINC05919169 | 3.57  | -0.08             | -28.13           | 1        | 8           | 0      | 488.54          | 9              | CCOC1ccc(cc1)[C@@H]2C(=C(C3ccc(cc3)OC)OC)OC)C(=O)C(=O)N2Cc4cccc4                  |
| ZINC05919169 | 2.54  | 0.14              | -21.26           | 0        | 8           | 0      | 488.54          | 10             | CCOC1ccc(cc1)[C@@H]2[C@@H]([C(=O)C1=O])N2C3ccc3)C(=O)c4ccc(cc4)OC)OC              |



**Supplementary Table S2:**  
**Detailed table of XP Docking using Schrodinger's Glide module**

| ZINC_ID      | sLogP | ApolarDesolvation | PolarDesolvation | H Donors | H Acceptors | Charge | MolecularWeight | RotatableBonds | SMILES                                                                                   |
|--------------|-------|-------------------|------------------|----------|-------------|--------|-----------------|----------------|------------------------------------------------------------------------------------------|
| ZINC08440589 | 3.41  | -2.24             | -53.59           | 2        | 9           | 1      | 573.666         | 11             | CCOC1cc(ccc1O)[C@@H]2[C@H](C(=O)C(=O)N2CC[NH+][3CCOCC3]C(=O)C4ccc(cc4C)OCc5ccc5          |
| ZINC02063033 | 7.11  | 1.83              | -12.13           | 1        | 7           | 0      | 583.419         | 7              | CCOC(=O)c1c2c(sc1NC(=O)c3cc4nc(cc1n4n3)C(F)F)c5ccc(c1c5)C1)CCCC2                         |
| ZINC08440586 | 5.74  | 3.06              | -15.62           | 1        | 5           | 0      | 471.504         | 8              | CCOC1ccc(cc1)NC(=O)CSe2c(c(ccn2)c3ccc(cc3)C)C(F)F)C#N                                    |
| ZINC08440585 | 7.29  | 2.67              | -18.21           | 1        | 9           | 0      | 638.4           | 7              | C1cc(ccc1c2cc(n3c(n2)c(cn3)C(=O)Nc4ccc(cc4)Oe5ccc6c(c5)C(C6)N+[(=O)]O-))C(F)F)Br         |
| ZINC02742587 | 6.04  | 0.87              | -15.34           | 1        | 5           | 0      | 540.137         | 4              | c1ccc(ccc1c2cc(n3c(n2)c(cn3)C(=O)Nc4ccc(cc4)Br)C(F)F)Br                                  |
| ZINC08440584 | 3.5   | 9.97              | -17.43           | 2        | 6           | 0      | 467.367         | 3              | CC1=C([C@@H](C2=C(N1)CC(C2=O)(C)C)c3ccc3)C(=O)Nc4ccc(cc4)Br                              |
| ZINC08440584 | 3.64  | -2.14             | -21.5            | 1        | 6           | 0      | 467.367         | 3              | CC1(C2=NC(=C)C([C@@H]([C@@H]2C(=O)C1)c3ccc3)C(=O)Nc4ccc(cc4)Br)C                         |
| ZINC08440584 | 3.64  | -2.72             | -20.25           | 1        | 6           | 0      | 467.367         | 3              | CC1(C2=NC(=C)C([C@@H](C2C(=O)C1)c3ccc3)C(=O)Nc4ccc(cc4)Br)C                              |
| ZINC08440584 | 3.46  | -2.75             | -20.97           | 1        | 6           | 0      | 467.367         | 3              | CC1=C([C@@H]([C@@H]2C(=N1)CC(C2=O)(C)C)c3ccc3)C(=O)Nc4ccc(cc4)Br                         |
| ZINC0666527  | 5.54  | 1.45              | -11.6            | 1        | 6           | 0      | 491.267         | 5              | COC1cccc1NC(=O)c2cc3nc(ccn3n2)C(F)F)C4ccc(cc4)Br                                         |
| ZINC02063028 | 3.54  | -3.25             | -12.49           | 0        | 4           | 0      | 319.769         | 3              | c1cc2ccnc2c(c1)OS(=O)(=O)c3ccc(cc3)C                                                     |
| ZINC08440583 | 4.62  | 0.55              | -13.83           | 0        | 7           | 0      | 423.494         | 6              | CC(C)Oc1ccc(cc1)c2nc3n(n2)c(=O)/c(=C)c4ccc(cc4O)OC/s3                                    |
| ZINC0666509  | 3.26  | 0.93              | -14.72           | 1        | 10          | 0      | 469.494         | 8              | COC1ccc(cc1)C(=O)N/C=C/C2cc(c(cc2N+)[=O])O)OC)OC/C(=O)N3CCCC3                            |
| ZINC08440582 | 10.33 | 6.08              | -7.5             | 0        | 2           | 0      | 629.819         | 6              | Cc1ccc(cc1)C(=O)N2c3ccc(cc3)C@([C2(C)C]C)C4ccc(cc4)F(c5ccc5)(c6ccc6)c7ccc7               |
| ZINC08440581 | 10.33 | 6.14              | -8.26            | 0        | 2           | 0      | 629.819         | 6              | Cc1ccc(cc1)C(=O)N2c3ccc(cc3)C@([C2(C)C]C)C4ccc(cc4)F(c5ccc5)(c6ccc6)c7ccc7               |
| ZINC0702625  | 0.11  | 10.89             | -33.36           | 2        | 7           | 1      | 423.518         | 4              | CCCn+1c(c(cc2nc3c(cccn3c2=O)C)S(=O)(=O)c4ccc(cc4)C)N                                     |
| ZINC02063023 | 6.94  | 2.35              | -10.43           | 0        | 5           | 0      | 511.021         | 5              | C([C@@H]1C[C@H]([C2ccc2N1C(=O)c3ccc(cc3)C]N(c4ccc4)C(=O)c5ccc(cc5)OC                     |
| ZINC02063024 | 6.94  | 2.05              | -11.51           | 0        | 5           | 0      | 511.021         | 5              | C([C@@H]1C[C@H]([C2ccc2N1C(=O)c3ccc(cc3)C]N(c4ccc4)C(=O)c5ccc(cc5)OC                     |
| ZINC08440580 | 6.97  | 14.83             | -36.44           | 2        | 8           | 0      | 619.738         | 8              | C1ccc(cc1)NC(=O)C2=C(NC3=C([C@@H]2c4ccc(c4)C)S5nc(ccn5)C(F)F)C)OC(C(=O)C3)C)C            |
| ZINC08440580 | 7.11  | -1.87             | -23.2            | 1        | 8           | 0      | 619.738         | 8              | C1ccc(cc1)NC(=O)C2[C@@H]([C3C(=NC2=O)CC(C3=O)(C)C)C4ccc(c4)C5c5nc(ccn5)C(F)F)C)OC        |
| ZINC02063025 | 6.94  | 2.61              | -16.73           | 0        | 5           | 0      | 511.021         | 5              | C([C@@H]1C[C@H]([C2ccc2N1C(=O)c3ccc(cc3)C]N(c4ccc4)C(=O)c5ccc(cc5)OC                     |
| ZINC02063026 | 6.94  | 2.4               | -12.41           | 0        | 5           | 0      | 511.021         | 5              | C([C@@H]1C[C@H]([C2ccc2N1C(=O)c3ccc(cc3)C]N(c4ccc4)C(=O)c5ccc(cc5)OC                     |
| ZINC0702621  | 0.32  | 11.08             | -34.91           | 2        | 8           | 1      | 481.941         | 4              | C1ccn2c1nc3c(c2=O)cc(c(f(n+)[3Cc4ccc4)N)S(=O)(=O)c5ccc(cc5)C                             |
| ZINC01823289 | 8.57  | 3.25              | -11.68           | 0        | 4           | 0      | 516.685         | 8              | CCCCC1ccc(cc1)C(=O)N2c3ccc(cc3)C@H(C)C([C@@H]2C)N(c4ccc4)C(=O)c5ccc5                     |
| ZINC01823291 | 8.57  | 2.91              | -12.81           | 0        | 4           | 0      | 516.685         | 8              | CCCCC1ccc(cc1)C(=O)N2c3ccc(cc3)C@H(C)C([C@@H]2C)N(c4ccc4)C(=O)c5ccc5                     |
| ZINC01823290 | 8.57  | 3.56              | -17.39           | 0        | 4           | 0      | 516.685         | 8              | CCCCC1ccc(cc1)C(=O)N2c3ccc(cc3)C@H(C)C([C@@H]2C)N(c4ccc4)C(=O)c5ccc5                     |
| ZINC01823292 | 8.57  | 3.32              | -11.31           | 0        | 4           | 0      | 516.685         | 8              | CCCCC1ccc(cc1)C(=O)N2c3ccc(cc3)C@H(C)C([C@@H]2C)N(c4ccc4)C(=O)c5ccc5                     |
| ZINC08440579 | 6.97  | 15                | -35.1            | 2        | 8           | 0      | 619.738         | 8              | C1ccc(cc1)NC(=O)C2=C(NC3=C([C@@H]2c4ccc(c4)C)S5nc(ccn5)C(F)F)C)OC(C(=O)C3)C)C            |
| ZINC08440579 | 7.11  | -1.06             | -18.04           | 1        | 8           | 0      | 619.738         | 8              | C1ccc(cc1)NC(=O)C2[C@@H]([C3C(=NC2=O)CC(C3=O)(C)C)C4ccc(c4)C5c5nc(ccn5)C(F)F)C)OC        |
| ZINC01746406 | 8.02  | 2.77              | -13.36           | 0        | 5           | 0      | 573.761         | 6              | CCOC1ccc2c(c1)/C=C/3)SC(=C(S3)C(=O)OC)C4ccc4)/C(=S)C(N2C(=O)c5ccc5)(C)C                  |
| ZINC01761545 | 7.64  | 2.41              | -13.58           | 0        | 5           | 0      | 559.734         | 5              | CC1(C(=S)/C=C/2)SC(=C(S2)C(=O)OC)c3ccc3)/c4cc(ccc4)N1C(=O)c5ccc5)OC)C                    |
| ZINC0702618  | 4.1   | 0.9               | -16.62           | 0        | 7           | 0      | 466.559         | 8              | CCOC1ccc(cc1OC)[C@@H]2C(=C(N=C3N2C(=O)CCS3)C)C(=O)OCc4ccc4                               |
| ZINC02063018 | 8.04  | 3.07              | -13.5            | 0        | 4           | 0      | 543.735         | 4              | C1ccc2c(c1)/C=C/3)SC(=C(S3)C(=O)OC)C4ccc4)/C(=S)C(N2C(=O)c5ccc5)(C)C                     |
| ZINC08440578 | 7.25  | 1.61              | -13.03           | 0        | 4           | 0      | 478.617         | 9              | COC1ccc(c1)OCCSc2nc(c(n2c3ccc3)c4ccc4)c5ccc5                                             |
| ZINC01812606 | 5.97  | 2.61              | -14.2            | 0        | 5           | 0      | 497.663         | 4              | CC(=O)N1c2ccc(cc2)/C=C/3)SC(=C(S3)C(=O)OC)C4ccc4)/C(=S)C1(C)C)OC                         |
| ZINC0702619  | 4.1   | 0.93              | -14.97           | 0        | 7           | 0      | 466.559         | 8              | CCOC1ccc(cc1OC)[C@@H]2C(=C(N=C3N2C(=O)CCS3)C)C(=O)OCc4ccc4                               |
| ZINC02063015 | 6.76  | 0.74              | -9.16            | 1        | 3           | 0      | 439.627         | 3              | C1ccc2c(c1)NC(=S)/C2=C/3)SC(=C(S3)C(=O)OC)C4ccc4)/C)C                                    |
| ZINC02259570 | 6.74  | 0.78              | -10.38           | 1        | 4           | 0      | 469.653         | 5              | CCOC1ccc2c(c1)/C=C/3)SC(=C(S3)C(=O)OC)C4ccc4)/C(=S)C(N2)C)C                              |
| ZINC08440577 | 6.46  | 3.25              | -16.92           | 0        | 8           | 0      | 583.709         | 5              | Cc1c2c(cc1CN(C)C(=S)C2=C3SC(=C(S3)C(=O)OC)C(=O)OC)C)C(=O)c4ccc5c(c4)OC05                 |
| ZINC01806052 | 5.97  | -0.39             | -12.97           | 0        | 4           | 0      | 464.033         | 4              | CC1(c2c(c(=S)ss2)c3cc(cc3N1C(=O)C)c4ccc(cc4)C)OC)C                                       |
| ZINC08440576 | 6.81  | 14.57             | -37.91           | 2        | 7           | 0      | 578.496         | 7              | C1cccnc1NC(=O)C2=C([C@@H]2c4ccc(c4)C)Oe5ccc(c5)C1)OC(C(=O)CCC3)C                         |
| ZINC08440576 | 6.95  | -1.97             | -17.27           | 1        | 7           | 0      | 578.496         | 7              | C1cccnc1NC(=O)C2[C@@H]([C3C(=NC2=O)CC(C3=O)c4ccc(cc4)C)Oe5ccc(c5)C1)OC                   |
| ZINC08440575 | 4.12  | 0.91              | -52.06           | 2        | 7           | 1      | 487.576         | 10             | C[NH+](C)CCN1[C@H](C(=C(C1=O)C)C(=O)c2ccc(cc2)OC)c3ccc(cc3)OCc4ccc4                      |
| ZINC08440575 | 3.53  | 0.76              | -61.47           | 1        | 7           | 1      | 487.576         | 10             | C[NH+](C)CCN1[C@H]([C@@H]([C(=O)C1=O)C(=O)c2ccc(cc2)OC)c3ccc(cc3)OCc4ccc4                |
| ZINC08440574 | 6.84  | 3.61              | -17.63           | 0        | 7           | 0      | 590.144         | 7              | Cc1ccc2c(c1)C(=C3SC(=C(S3)C(=O)OC)C)C(=O)OC)C)C(S)C(N2C(=O)OC)c4ccc(cc4)C1)C)C           |
| ZINC02062574 | 5.94  | -0.4              | -10.36           | 0        | 3           | 0      | 434.007         | 3              | CC1(c2c(c(=S)ss2)-c3ccc3N1C(=O)C)c4ccc(cc4)C)C                                           |
| ZINC02062573 | 7.4   | 0.82              | -6.55            | 0        | 2           | 0      | 439.671         | 2              | Cc1ccc-2c1N(C)C(c3c2c(=S)ss3)(C)C)C(=O)c4ccc(cc4)C)C)C                                   |
| ZINC08440573 | 4.12  | 1.39              | -56.34           | 2        | 7           | 1      | 487.576         | 10             | C[NH+](C)CCN1[C@H]([C@@H]([C(=C(C1=O)C)C(=O)c2ccc(cc2)OC)c3ccc(cc3)OCc4ccc4              |
| ZINC08440573 | 3.53  | 1.22              | -65.71           | 1        | 7           | 1      | 487.576         | 10             | C[NH+](C)CCN1[C@H]([C@@H]([C(=O)C1=O)C(=O)c2ccc(cc2)OC)c3ccc(cc3)OCc4ccc4                |
| ZINC08440571 | 5.05  | -0.15             | -56.15           | 3        | 7           | 1      | 529.657         | 12             | C[NH+](CC)CCCN1[C@H]([C(=C(C1=O)C)C(=O)c2ccc(cc2)OC)c3ccc(cc3)C)c4ccc(cc4)O              |
| ZINC08440571 | 4.47  | -0.32             | -65.55           | 2        | 7           | 1      | 529.657         | 12             | C[NH+](CC)CCCN1[C@H]([C@@H]([C(=O)C1=O)C(=O)c2ccc(cc2)OC)c3ccc(cc3)C)c4ccc(cc4)O         |
| ZINC08440570 | 6.81  | 14.71             | -36.24           | 2        | 7           | 0      | 578.496         | 7              | Cc1cccnc1NC(=O)C2=C([C@@H]2c4ccc(c4)C)Oe5ccc(c5)C1)OC(C(=O)CCC3)C                        |
| ZINC08440570 | 6.95  | -1.93             | -17.11           | 1        | 7           | 0      | 578.496         | 7              | Cc1cccnc1NC(=O)C2[C@@H]([C3C(=NC2=O)CC(C3=O)c4ccc(cc4)C)Oe5ccc(c5)C1)OC                  |
| ZINC08440566 | 5.05  | -0.44             | -46.69           | 3        | 7           | 1      | 529.657         | 12             | C[NH+](CC)CCCN1[C@H]([C(=C(C1=O)C)C(=O)c2ccc(cc2)OC)c3ccc(cc3)C)c4ccc(cc4)O              |
| ZINC08440566 | 4.47  | -0.53             | -56.54           | 2        | 7           | 1      | 529.657         | 12             | C[NH+](CC)CCCN1[C@H]([C@@H]([C(=O)C1=O)C(=O)c2ccc(cc2)OC)c3ccc(cc3)C)c4ccc(cc4)O         |
| ZINC0666458  | 5.14  | 11.14             | -8.88            | 2        | 6           | 0      | 399.535         | 8              | CCN(CC)1ccc(cc1)[C@H]2C(=C(NC(=O)N2)C)C(=O)OCC3CCCC3                                     |
| ZINC08440561 | 4.13  | 0.48              | -61.37           | 2        | 8           | 1      | 533.576         | 9              | COC1ccc(cc1F)C(=O)C2=C(C(=O)N)([C@H]2c3ccc(cc3)OCc4ccc4)C[NH+][5CCOCC5]O                 |
| ZINC08440561 | 3.55  | 0.32              | -70.39           | 1        | 8           | 1      | 533.576         | 9              | COC1ccc(cc1F)C(=O)C2=C(C(=O)N)([C@H]2[C@@H](N(C(=O)C2=O)CC)N+)[3CCOCC3]C4ccc(cc4)Oe5ccc5 |
| ZINC0666462  | 5.14  | 11.05             | -10.01           | 2        | 6           | 0      | 399.535         | 8              | CCN(CC)1ccc(cc1)[C@H]2C(=C(NC(=O)N2)C)C(=O)OCC3CCCC3                                     |
| ZINC08440560 | 5.94  | 14.38             | -18.72           | 1        | 6           | 0      | 475.585         | 9              | CCOC1ccc(cc1OC)[C@H]2C3=C(C)C([C3=O)c4ccc4)NC(=C2(=O)OCC)C                               |
| ZINC08440560 | 6.05  | 0.08              | -9.01            | 0        | 6           | 0      | 475.585         | 9              | CCOC1ccc(cc1OC)[C@H]2C3C(=O)C[C@@H]([C=C3N=C2(C)O)OC)C4ccc4                              |







Supplementary Table S2:

Detailed table of XP Docking using Schrodinger's Glide module

| ZINC_ID      | xLogP | ApolarDesolvation | PolarDesolvation | H Donors | H Acceptors | Charge | MolecularWeight | RotatableBonds | SMILES                                                                                 |
|--------------|-------|-------------------|------------------|----------|-------------|--------|-----------------|----------------|----------------------------------------------------------------------------------------|
| ZINC08440517 | 6.59  | -2.47             | -15.95           | 1        | 10          | 0      | 633.499         | 8              | Cc1ccc(c(c1)[N+](=O)[O-])OCC2cc(c2c2O)C[C@H]3C4C(=O)CCC=C4N=C(C3C(=O)Nc5ccc(cn5)Br)C   |
| ZINC08440516 | 4.81  | -0.44             | -13.52           | 1        | 7           | 0      | 528.428         | 8              | CCCCO1ccc(cc1)C(=O)C2=C(C(=O)N(C[C@H]2c3ccc(cc3)Br)c4nnc(s4)C)O                        |
| ZINC08440515 | 4.23  | -0.6              | -16.08           | 0        | 7           | 0      | 528.428         | 8              | CCCCO1ccc(cc1)C(=O)C[C@H]2[C@@H](N(C(=O)C2=O)c3nnc(s3)C)c4ccc(cc4)Br                   |
| ZINC08440515 | 7.04  | -0.39             | -13.37           | 1        | 6           | 0      | 557.741         | 11             | CCc1ccc(cc1)C(=O)CSC2=NC(=C(C[C@H](C2C#N)c3ccc(s3)C)O)Nc4cccc4OC)C                     |
| ZINC08440515 | 6.66  | 0.03              | -17.17           | 1        | 6           | 0      | 557.741         | 11             | CCc1ccc(cc1)C(=O)CSC2=C(C[C@H](C(C(=N2)C)C(=O)Nc3cccc3OC)c4cccc4)C#N                   |
| ZINC08440515 | 6.66  | 1.51              | -14.21           | 1        | 6           | 0      | 557.741         | 11             | CCc1ccc(cc1)C(=O)CSC2=C(C[C@H](C(C(=N2)C)C(=O)Nc3cccc3OC)c4cccc4)C#N                   |
| ZINC08440512 | 4.81  | -0.46             | -13.49           | 1        | 7           | 0      | 528.428         | 8              | CCCCO1ccc(cc1)C(=O)C2=C(C(=O)N(C[C@H]2c3ccc(cc3)Br)c4nnc(s4)C)O                        |
| ZINC08440512 | 4.23  | -0.54             | -17.72           | 0        | 7           | 0      | 528.428         | 8              | CCCCO1ccc(cc1)C(=O)C[C@H]2[C@@H](N(C(=O)C2=O)c3nnc(s3)C)c4ccc(cc4)Br                   |
| ZINC0841851  | 5.65  | 2.26              | -12.71           | 0        | 4           | 0      | 422.937         | 5              | Cc1ccc(o1)c2c3c(nc(c2C#N)SCC(=O)c4ccc(cc4)C)CCCC3                                      |
| ZINC06444297 | 5.76  | 13.49             | -30.05           | 2        | 6           | 0      | 515.66          | 8              | Cc1cccnc1NC(=O)C2=C(NC(=C(C[C@H]2c3ccc(cc3)OC)C#N)SCC(=O)c4cccc4)C                     |
| ZINC06444297 | 6.09  | -0.94             | -14.36           | 1        | 6           | 0      | 515.66          | 8              | Cc1cccnc1NC(=O)C2=C(NC(=C(C[C@H]2c3ccc(cc3)OC)C#N)SCC(=O)c4cccc4)C                     |
| ZINC06444297 | 6.28  | -1.9              | -14.36           | 1        | 6           | 0      | 515.66          | 8              | Cc1cccnc1NC(=O)C2[C@@H](C(C(=NC2=O)SCC(=O)c3ccc(s3)C#N)c4ccc(cc4)OC                    |
| ZINC0702574  | 3.98  | 1.75              | -19.39           | 1        | 9           | 0      | 540.569         | 9              | CCOC(=O)c1c(nc(s1)N)2[C@@H](C(C(=O)C2=O)C)C(=O)c3ccc(cc3)F)C4ccc(cc4)OC)C              |
| ZINC0702574  | 3.4   | 1.59              | -23.67           | 0        | 9           | 0      | 540.569         | 9              | CCOC(=O)c1c(nc(s1)N)2[C@@H](C(C(=O)C2=O)C)C(=O)c3ccc(cc3)F)C4ccc(cc4)OC)C              |
| ZINC08440511 | 6.47  | 15.71             | -25.25           | 2        | 10          | 0      | 633.499         | 8              | Cc1ccc(c(c1)[N+](=O)[O-])OCC2cc(c2c2O)C[C@H]3C4C(=O)CCC=C4N=C(C3C(=O)Nc5ccc(cn5)Br)C   |
| ZINC08440511 | 6.59  | -2.5              | -15.93           | 1        | 10          | 0      | 633.499         | 8              | Cc1ccc(c(c1)[N+](=O)[O-])OCC2cc(c2c2O)C[C@H]3C4C(=O)CCC=C4N=C(C3C(=O)Nc5ccc(cn5)Br)C   |
| ZINC06444263 | 5.76  | 13.62             | -21.98           | 2        | 6           | 0      | 515.66          | 8              | Cc1cccnc1NC(=O)C2=C(NC(=C(C[C@H]2c3ccc(cc3)OC)C#N)SCC(=O)c4cccc4)C                     |
| ZINC06444263 | 6.09  | -0.42             | -13.5            | 1        | 6           | 0      | 515.66          | 8              | Cc1cccnc1NC(=O)C2=C(NC(=C(C[C@H]2c3ccc(cc3)OC)C#N)SCC(=O)c4cccc4)C                     |
| ZINC06444263 | 6.28  | -1.28             | -14.59           | 1        | 6           | 0      | 515.66          | 8              | Cc1cccnc1NC(=O)C2[C@@H](C(C(=NC2=O)SCC(=O)c3ccc(s3)C#N)c4ccc(cc4)OC                    |
| ZINC08440510 | 4.42  | 10.18             | -23.25           | 2        | 5           | 0      | 425.941         | 5              | CC1=C(C[C@H](C(=O)N1)SC)C#N2c2ccc2C1C(=O)Nc3cccc3OC                                    |
| ZINC08440510 | 4.94  | -0.87             | -10.41           | 1        | 5           | 0      | 425.941         | 5              | Cc1cccnc1NC(=O)C2[C@@H](C(C(=NC2=O)SC)C#N)c3cccc3C                                     |
| ZINC08440510 | 4.94  | 0.94              | -15.84           | 1        | 5           | 0      | 425.941         | 5              | Cc1cccnc1NC(=O)C2[C@@H](C(C(=NC2=O)SC)C#N)c3cccc3C                                     |
| ZINC08440510 | 4.76  | -0.64             | -11.56           | 1        | 5           | 0      | 425.941         | 5              | CC1=C(C[C@H](C(=O)N1)SC)C#N2c2ccc2C1C(=O)Nc3cccc3OC                                    |
| ZINC08440509 | 4.42  | 10.14             | -15.39           | 2        | 5           | 0      | 425.941         | 5              | CC1=C(C[C@H](C(=O)N1)SC)C#N2c2ccc2C1C(=O)Nc3cccc3OC                                    |
| ZINC08440509 | 4.94  | -0.71             | -8.91            | 1        | 5           | 0      | 425.941         | 5              | Cc1cccnc1NC(=O)C2[C@@H](C(C(=NC2=O)SC)C#N)c3cccc3C                                     |
| ZINC08440509 | 4.94  | 1.16              | -16.36           | 1        | 5           | 0      | 425.941         | 5              | Cc1cccnc1NC(=O)C2[C@@H](C(C(=NC2=O)SC)C#N)c3cccc3C                                     |
| ZINC08440509 | 4.76  | -0.4              | -8.75            | 1        | 5           | 0      | 425.941         | 5              | CC1=C(C[C@H](C(=O)N1)SC)C#N2c2ccc2C1C(=O)Nc3cccc3OC                                    |
| ZINC0702575  | 3.98  | 1.74              | -19.63           | 1        | 9           | 0      | 540.569         | 9              | CCOC(=O)c1c(nc(s1)N)2[C@@H](C(C(=O)C2=O)C)C(=O)c3ccc(cc3)F)C4ccc(cc4)OC)C              |
| ZINC0702575  | 3.4   | 1.65              | -26.06           | 0        | 9           | 0      | 540.569         | 9              | CCOC(=O)c1c(nc(s1)N)2[C@@H](C(C(=O)C2=O)C)C(=O)c3ccc(cc3)F)C4ccc(cc4)OC)C              |
| ZINC08440508 | 4.66  | -0.07             | -11.57           | 1        | 6           | 0      | 453.589         | 8              | CCOC(=O)CSC1=NC(=C(C[C@H](C1C#N)c2ccc2)C)O)Nc3cccc3C                                   |
| ZINC08440508 | 4.28  | 0.09              | -12.58           | 1        | 6           | 0      | 453.589         | 8              | CCOC(=O)CSC1=C(C[C@H](C(C(=N1)C)C(=O)Nc2ccc2C)C3ccc(s3)C#N                             |
| ZINC08440508 | 4.28  | 1.92              | -12.59           | 1        | 6           | 0      | 453.589         | 8              | CCOC(=O)CSC1=C(C[C@H](C(C(=N1)C)C(=O)Nc2ccc2C)C3ccc(s3)C#N                             |
| ZINC08440507 | 4.66  | -0.07             | -12.05           | 1        | 6           | 0      | 453.589         | 8              | CCOC(=O)CSC1=NC(=C(C[C@H](C1C#N)c2ccc2)C)O)Nc3cccc3C                                   |
| ZINC08440507 | 4.28  | 0.39              | -15.72           | 1        | 6           | 0      | 453.589         | 8              | CCOC(=O)CSC1=C(C[C@H](C(C(=N1)C)C(=O)Nc2ccc2C)C3ccc(s3)C#N                             |
| ZINC08440507 | 4.28  | 1.83              | -12.7            | 1        | 6           | 0      | 453.589         | 8              | CCOC(=O)CSC1=C(C[C@H](C(C(=N1)C)C(=O)Nc2ccc2C)C3ccc(s3)C#N                             |
| ZINC08440504 | 3.75  | 10.24             | -52.42           | 2        | 6           | 1      | 443.589         | 9              | Cc1ccc(cc1)OC(C)C(=O)C2=C(C(=O)N(C[C@H]2c3ccc3)CC(C)N)C(C)O                            |
| ZINC08440504 | 3.17  | 10.96             | -60.85           | 1        | 6           | 1      | 443.589         | 9              | Cc1ccc(cc1)OC(C)C(=O)C[C@H]2[C@@H](N(C(=O)C2=O)CC(C)N)C(C)C3ccc3                       |
| ZINC08440503 | 5.39  | 14.47             | -23.39           | 2        | 5           | 0      | 503.624         | 7              | Cc1cccnc1NC(=O)C2=C(NC(=C(C[C@H]2c3ccc3)C#N)SCC(=O)c4ccc(cc4)F)C                       |
| ZINC08440502 | 5.73  | 0.05              | -13.08           | 1        | 5           | 0      | 503.624         | 7              | Cc1cccnc1NC(=O)C2=C(NC(=C(C[C@H]2c3ccc3)C#N)SCC(=O)c4ccc(cc4)F)C                       |
| ZINC08440502 | 5.91  | -0.98             | -14.61           | 1        | 5           | 0      | 503.624         | 7              | Cc1cccnc1NC(=O)C2[C@@H](C(C(=NC2=O)SCC(=O)c3ccc(cc3)F)C#N)c4cccc4                      |
| ZINC08440502 | 3.75  | 10.04             | -46.13           | 2        | 6           | 1      | 443.589         | 9              | Cc1ccc(cc1)OC(C)C(=O)C2=C(C(=O)N(C[C@H]2c3ccc3)CC(C)N)C(C)O                            |
| ZINC08440502 | 3.17  | 10.7              | -55.4            | 1        | 6           | 1      | 443.589         | 9              | Cc1ccc(cc1)OC(C)C(=O)C[C@H]2[C@@H](N(C(=O)C2=O)CC(C)N)C(C)C3ccc3                       |
| ZINC08440501 | 2.56  | 9.64              | -55.78           | 2        | 7           | 1      | 438.548         | 9              | Cc1ccc(cc1)OC(C)C(=O)C2=C(C(=O)N(C[C@H]2c3ccc3)CC(C)N)C(C)O                            |
| ZINC08440501 | 1.98  | 10.34             | -64.83           | 1        | 7           | 1      | 438.548         | 9              | Cc1ccc(cc1)OC(C)C(=O)C[C@H]2[C@@H](N(C(=O)C2=O)CC(C)N)C(C)C3ccc3                       |
| ZINC08440500 | 6.47  | 16.95             | -21.56           | 2        | 8           | 0      | 596.687         | 8              | CC1=C(C[C@H](C2=C(N1)C)C[C@H](C2=O)c3ccc3)c4ccc(cc4)OCc5ccc(cc5)C#N)OC(C)C(=O)Nc6cccc6 |
| ZINC08440500 | 6.61  | 1.53              | -15.95           | 1        | 8           | 0      | 596.687         | 8              | CC1=C(C[C@H](C2=C(N1)C)C[C@H](C2=O)c3ccc3)c4ccc(cc4)OCc5ccc(cc5)C#N)OC(C)C(=O)Nc6cccc6 |
| ZINC08440500 | 6.61  | 0.46              | -18.12           | 1        | 8           | 0      | 596.687         | 8              | CC1=C(C[C@H](C2=C(N1)C)C[C@H](C2=O)c3ccc3)c4ccc(cc4)OCc5ccc(cc5)C#N)OC(C)C(=O)Nc6cccc6 |
| ZINC08440499 | 2.56  | 9.29              | -47.49           | 2        | 7           | 1      | 438.548         | 9              | Cc1ccc(cc1)OC(C)C(=O)C2=C(C(=O)N(C[C@H]2c3ccc3)CC(C)N)C(C)O                            |
| ZINC08440499 | 1.98  | 9.95              | -56.89           | 1        | 7           | 1      | 438.548         | 9              | Cc1ccc(cc1)OC(C)C(=O)C[C@H]2[C@@H](N(C(=O)C2=O)CC(C)N)C(C)C3ccc3                       |
| ZINC08440498 | 5.39  | 14.29             | -31.81           | 2        | 5           | 0      | 503.624         | 7              | Cc1cccnc1NC(=O)C2=C(NC(=C(C[C@H]2c3ccc3)C#N)SCC(=O)c4ccc(cc4)F)C                       |
| ZINC08440498 | 5.73  | 0.06              | -14.06           | 1        | 5           | 0      | 503.624         | 7              | Cc1cccnc1NC(=O)C2=C(NC(=C(C[C@H]2c3ccc3)C#N)SCC(=O)c4ccc(cc4)F)C                       |
| ZINC08440498 | 5.91  | -0.72             | -13.76           | 1        | 5           | 0      | 503.624         | 7              | Cc1cccnc1NC(=O)C2[C@@H](C(C(=NC2=O)SCC(=O)c3ccc(cc3)F)C#N)c4cccc4                      |
| ZINC08440495 | 2.18  | 1.01              | -18.53           | 1        | 8           | 0      | 427.453         | 11             | COCCCN1[C@@H](C=C(C1=O)O)C(=O)c2ccc2c3ccc(cc3)OC)CC=C                                  |
| ZINC08440495 | 1.6   | 0.91              | -26.36           | 0        | 8           | 0      | 427.453         | 11             | COCCCN1[C@@H](C=C(C1=O)O)C(=O)c2ccc2c3ccc(cc3)OC)CC=C                                  |
| ZINC08440494 | 9.12  | 2.84              | -14.37           | 0        | 4           | 0      | 546.736         | 11             | CCc1ccc(cc1)C(=O)CS2c(c(c3n2)CCCC3)c4ccc(cc4)OCc5ccc(cc5)C#N                           |
| ZINC08440493 | 2.18  | 1.08              | -18.35           | 1        | 8           | 0      | 427.453         | 11             | COCCCN1[C@@H](C=C(C1=O)O)C(=O)c2ccc2c3ccc(cc3)OC)CC=C                                  |
| ZINC08440493 | 1.6   | 0.94              | -26.11           | 0        | 8           | 0      | 427.453         | 11             | COCCCN1[C@@H](C=C(C1=O)O)C(=O)c2ccc2c3ccc(cc3)OC)CC=C                                  |
| ZINC08440492 | 7.57  | 2.86              | -12.86           | 0        | 5           | 0      | 520.654         | 10             | c1ccc(cc1)OCc2ccc(cc2)c3c4c(nc(c3C#N)SCC(=O)OC)c5ccc5CCCC4                             |
| ZINC0262389  | 6.58  | -1.43             | -10.71           | 1        | 4           | 0      | 461.29          | 3              | c1ccc(cc1)F)C(=O)Nc2ccc3c(c2)nc(o3)c4ccc5c4ccc5Br                                      |
| ZINC08440491 | 6.47  | 16.96             | -21.83           | 2        | 8           | 0      | 596.687         | 8              | CC1=C(C[C@H](C2=C(N1)C)C[C@H](C2=O)c3ccc3)c4ccc(cc4)OCc5ccc(cc5)C#N)OC(C)C(=O)Nc6cccc6 |
| ZINC08440491 | 6.61  | 0.4               | -17.87           | 1        | 8           | 0      | 596.687         | 8              | CC1=C(C[C@H](C2=C(N1)C)C[C@H](C2=O)c3ccc3)c4ccc(cc4)OCc5ccc(cc5)C#N)OC(C)C(=O)Nc6cccc6 |





Supplementary Table S2:

Detailed table of XP Docking using Schrodinger's Glide module

| ZINC_ID      | xLogP | ApolarDesolvation | PolarDesolvation | H Donors | H Acceptors | Charge | MolecularWeight | RotatableBonds | SMILES                                                                                   |
|--------------|-------|-------------------|------------------|----------|-------------|--------|-----------------|----------------|------------------------------------------------------------------------------------------|
| ZINC08440404 | 4.81  | 9.16              | -38              | 1        | 7           | 1      | 499.682         | 7              | c1ccc(cc1)/NH+=c\2/n(c(cs2)c3ccc(cc3)S(=O)(=O)N4CCCC4)CCN5CCOCC5                         |
| ZINC08440404 | 4.81  | 11.5              | -108.6           | 2        | 7           | 2      | 500.69          | 7              | c1ccc(cc1)/NH+=c\2/n(c(cs2)c3ccc(cc3)S(=O)(=O)N4CCCC4)CC[NH+]5CCOCC5                     |
| ZINC08440402 | 6.86  | -2.17             | -11.27           | 0        | 5           | 0      | 469.676         | 5              | CC1CCN(CC1)S(=O)(=O)c2ccc(cc2)c3cs/c1=N\c4cccc4/n3C(C)C                                  |
| ZINC08440401 | 5.31  | 12.87             | -21.46           | 1        | 8           | 0      | 511.578         | 8              | CCOC(=O)[C@H]1[C@@H](CC2=C(C1=O))C@H([C=C(N2)C]C(=O)OCC)c3cnc4cccc4n3)c5cccc5            |
| ZINC08440401 | 5.43  | -0.52             | -13.31           | 0        | 8           | 0      | 511.578         | 8              | CCOC(=O)[C@H]1[C@@H](C=C2C(C1=O))C@H([C=C(N2)C]C(=O)OCC)c3cnc4cccc4n3)c5cccc5            |
| ZINC08440401 | 5.27  | -0.4              | -14.35           | 0        | 8           | 0      | 511.578         | 8              | CCOC(=O)[C@H]1[C@@H](CC2=C(C1=O))C@H([C=C(N2)C]C(=O)OCC)c3cnc4cccc4n3)c5cccc5            |
| ZINC08440395 | 7.13  | -2.14             | -11.34           | 0        | 5           | 0      | 469.676         | 5              | CC(C)Cn1c(cs/c1=N\c2cccc2)c3ccc(cc3)S(=O)(=O)N4CCCC4                                     |
| ZINC08440394 | 5.31  | 13.77             | -23.88           | 1        | 8           | 0      | 511.578         | 8              | CCOC(=O)[C@@H]1[C@@H](CC2=C(C1=O))C@H([C=C(N2)C]C(=O)OCC)c3cnc4cccc4n3)c5cccc5           |
| ZINC08440394 | 5.43  | 0.22              | -12.51           | 0        | 8           | 0      | 511.578         | 8              | CCOC(=O)[C@H]1[C@@H](C=C2C(C1=O))C@H([C=C(N2)C]C(=O)OCC)c3cnc4cccc4n3)c5cccc5            |
| ZINC08440394 | 5.27  | 0.34              | -14.26           | 0        | 8           | 0      | 511.578         | 8              | CCOC(=O)[C@@H]1[C@@H](CC2=C(C1=O))C@H([C=C(N2)C]C(=O)OCC)c3cnc4cccc4n3)c5cccc5           |
| ZINC08440394 | 5.43  | 1.58              | -26.95           | 0        | 8           | 0      | 511.578         | 8              | CCOC(=O)[C@H]1[C@@H](C=C2C(C1=O))C@H([C=C(N2)C]C(=O)OCC)c3cnc4cccc4n3)c5cccc5            |
| ZINC08440392 | 4.35  | 0.36              | -13.71           | 0        | 6           | 0      | 438.568         | 10             | CCOCc1ccc(cc1)C(=O)N2CCN(CC2)C(=O)c3ccc(cc3)OCCCC                                        |
| ZINC00702509 | 4.32  | -3.39             | -17.17           | 2        | 6           | 0      | 490.412         | 7              | c1ccc(cc1)CNC(=O)c2c3c(sc2N(C)=O)CO4ccc(cc4)C1)CCCC3                                     |
| ZINC08440388 | 5.11  | 0.03              | -51.93           | 2        | 3           | 1      | 469.346         | 4              | c1ccc2c(c1)CC[NH+]([C2]C3ccc(cc3)C(=O)Nc4ccc(c4)1                                        |
| ZINC08440387 | 5.31  | 13.77             | -24.68           | 1        | 8           | 0      | 511.578         | 8              | CCOC(=O)[C@H]1[C@@H](CC2=C(C1=O))C@H([C=C(N2)C]C(=O)OCC)c3cnc4cccc4n3)c5cccc5            |
| ZINC08440387 | 5.43  | 0.14              | -13.58           | 0        | 8           | 0      | 511.578         | 8              | CCOC(=O)[C@H]1[C@@H](CC2=C(C1=O))C@H([C=C(N2)C]C(=O)OCC)c3cnc4cccc4n3)c5cccc5            |
| ZINC08440387 | 5.27  | 0.33              | -15.55           | 0        | 8           | 0      | 511.578         | 8              | CCOC(=O)[C@H]1[C@@H](CC2=C(C1=O))C@H([C=C(N2)C]C(=O)OCC)c3cnc4cccc4n3)c5cccc5            |
| ZINC08440387 | 5.43  | 1.47              | -19.74           | 0        | 8           | 0      | 511.578         | 8              | CCOC(=O)[C@H]1[C@@H](C=C2C(C1=O))C@H([C=C(N2)C]C(=O)OCC)c3cnc4cccc4n3)c5cccc5            |
| ZINC00702507 | 3.88  | -3.9              | -11.42           | 2        | 5           | 0      | 470.392         | 5              | c1cc(cnc1)CNC(=O)c2c3c(sc2N(C)=O)c4ccc(cc4)Br)CCCC3                                      |
| ZINC05944355 | 4.78  | 10.72             | -11.79           | 2        | 5           | 0      | 447.604         | 6              | CC(C)C1ccc(cc1)C(=O)Nc2c3c(c3)C(CCC3)C(=O)Nc4ccncc4                                      |
| ZINC02062318 | 6.6   | 9.87              | -11.39           | 1        | 4           | 0      | 461.29          | 3              | C1cc2c(ccc2Br)c(c1)c3nc4ccc4c3)N(C)=O)c5ccc(cc5)F                                        |
| ZINC00702501 | 4.01  | -0.79             | -18.21           | 2        | 6           | 0      | 442.512         | 7              | C[C@H](C)Nc1c(c2c(s1)CCCC2)C(=O)Nc3ccc3)O4cccc4F                                         |
| ZINC08440386 | 5.31  | 13.06             | -22.34           | 1        | 8           | 0      | 511.578         | 8              | CCOC(=O)[C@H]1[C@@H](C=C2C(C1=O))C@H([C=C(N2)C]C(=O)OCC)c3cnc4cccc4n3)c5cccc5            |
| ZINC08440386 | 5.43  | -0.34             | -12              | 0        | 8           | 0      | 511.578         | 8              | CCOC(=O)[C@H]1[C@@H](C=C2C(C1=O))C@H([C=C(N2)C]C(=O)OCC)c3cnc4cccc4n3)c5cccc5            |
| ZINC08440386 | 5.27  | -0.12             | -13.33           | 0        | 8           | 0      | 511.578         | 8              | CCOC(=O)[C@H]1[C@@H](CC2=C(C1=O))C@H([C=C(N2)C]C(=O)OCC)c3cnc4cccc4n3)c5cccc5            |
| ZINC08440386 | 5.43  | 1.04              | -16.73           | 0        | 8           | 0      | 511.578         | 8              | CCOC(=O)[C@@H]1[C@@H](C=C2C(C1=O))C@H([C=C(N2)C]C(=O)OCC)c3cnc4cccc4n3)c5cccc5           |
| ZINC08440385 | 6.14  | 2.8               | -13.6            | 0        | 8           | 0      | 535.666         | 10             | CCN(CC)C1ccc(cc1)/C=C\2/c(=O)n3c=NC(=O)C1[C@@H]3c4ccc(cc4)OC(C(=O)OCC)C1S2               |
| ZINC02062317 | 6.14  | 3.03              | -14.1            | 0        | 8           | 0      | 535.666         | 10             | CCN(CC)C1ccc(cc1)/C=C\2/c(=O)n3c=NC(=O)C1[C@@H]3c4ccc(cc4)OC(C(=O)OCC)C1S2               |
| ZINC00702500 | 4.01  | -0.79             | -18.21           | 2        | 6           | 0      | 442.512         | 7              | C[C@H](C)Nc1c(c2c(s1)CCCC2)C(=O)Nc3ccc3)O4cccc4F                                         |
| ZINC05946151 | 5.58  | 11.79             | -12.49           | 2        | 6           | 0      | 491.657         | 11             | CCCCCOC1ccc(cc1)C(=O)Nc2c3c(c3)C(CCC3)C(=O)Nc4ccncc4                                     |
| ZINC08440383 | 6.07  | 0.94              | -7.06            | 1        | 4           | 0      | 420.299         | 5              | c1ccc(cc1)COc2c(ccc2C1)C1/C=C\1/C#N/c3[nH]c4cccc4n3                                      |
| ZINC08440382 | 7.38  | 0.43              | -9.56            | 1        | 4           | 0      | 537.255         | 5              | C1ccc(cc1)COc2c(ccc2Br)/C=C\1/C#N/c3[nH]c4ccc(cc4n3)CBr                                  |
| ZINC08440381 | 9.12  | 2.09              | -13.57           | 0        | 6           | 0      | 595.12          | 8              | CCOC(=O)C1=C(N=C2n(c1=O)/c=C/c3ccc(cc3)OC4cccc54cccc5)/s2)[C@H]1c6ccc(cc6)C]C            |
| ZINC08440380 | 9.12  | 2.07              | -12.69           | 0        | 6           | 0      | 595.12          | 8              | CCOC(=O)C1=C(N=C2n(c1=O)/c=C/c3ccc(cc3)OC4cccc54cccc5)/s2)[C@H]1c6ccc(cc6)C]C            |
| ZINC08440379 | 7.38  | 2.01              | -15.91           | 0        | 8           | 0      | 549.004         | 6              | CCOC(=O)C1=C(N=C2n(c1=O)/c=C/c3ccc(cc3)c4ccc(cc4)C]S2)[C@H]1c5ccc(cc5)OCOC]C             |
| ZINC08440378 | 6.15  | -1.2              | -14.49           | 1        | 5           | 0      | 532.413         | 4              | CC1=NC2=C([C@@H]1[C]C(=O)N3ccc(cc3)Br)A4ccc(c4)F]C(=O)C[C@@H]1C2)c5cccc5                 |
| ZINC08440378 | 6.33  | 0.01              | -16.53           | 1        | 5           | 0      | 532.413         | 4              | c1cc1c(c1)[C@@H]([C@@H]2[C(=N1)]C[C@H](CC2=O)c3ccc(cc3)c4ccc(c4)F)C(=O)Nc5ccc(cc5)Br     |
| ZINC02263440 | 6.42  | 3.33              | -16.9            | 0        | 8           | 0      | 517.559         | 8              | CC1cc2c(cc1OC)C(=O)c3cc(c(c3)OC)OC(c2=O)4nc5cccc5s4                                      |
| ZINC08440377 | 7.38  | 2.05              | -16.16           | 0        | 8           | 0      | 549.004         | 6              | CCOC(=O)C1=C(N=C2n(c1=O)/c=C/c3ccc(cc3)c4ccc(cc4)C]S2)[C@H]1c5ccc(cc5)OCOC]C             |
| ZINC08440376 | 8.14  | 2.66              | -16.6            | 0        | 8           | 0      | 633.77          | 10             | CCOC(=O)C1=C(N=C2n(c1=O)/c=C/c3ccc(cc3)OC4cccc54cccc5)/s2)[C@H]1c6ccc(cc6)N(C)C]C        |
| ZINC08440375 | 8.14  | 2.64              | -16.79           | 0        | 8           | 0      | 633.77          | 10             | CCOC(=O)C1=C(N=C2n(c1=O)/c=C/c3ccc(cc3)OC4cccc54cccc5)/s2)[C@H]1c6ccc(cc6)N(C)C]C        |
| ZINC02148492 | 5.84  | 3.65              | -15.07           | 0        | 6           | 0      | 481.298         | 6              | COc1ccc(cc1OC)C(=O)Oc2ccc3c(c2)oc(c3=O)c4ccc(cc4)Br                                      |
| ZINC08440374 | 7.48  | 3.01              | -19.87           | 0        | 10          | 0      | 593.061         | 8              | CCOC(=O)C1=C(N=C2n(c1=O)/c=C/c3ccc(cc3)c4ccc(cc4)C]N+][=O]O-]/s2)[C@H]1c5ccc(cc5)N(C)C]C |
| ZINC08440373 | 7.48  | 3.07              | -19.32           | 0        | 10          | 0      | 593.061         | 8              | CCOC(=O)C1=C(N=C2n(c1=O)/c=C/c3ccc(cc3)c4ccc(cc4)C]N+][=O]O-]/s2)[C@H]1c5ccc(cc5)N(C)C]C |
| ZINC08440372 | 7.27  | 2.2               | -15.98           | 0        | 8           | 0      | 609.498         | 8              | CCOC(=O)C1=C(N=C2n(c1=O)/c=C/c3ccc(cc3)c4ccc(cc4)Br)/s2)[C@H]1c5ccc(cc5)OC]C             |
| ZINC00702490 | 5.87  | 4.87              | -15.06           | 0        | 8           | 0      | 476.481         | 10             | CCOC(=O)c1c2cc(ccc2oc1c3ccc(cc3)OC)OC(=O)c4ccc(cc4)OC                                    |
| ZINC08440371 | 7.27  | 2.16              | -15.81           | 0        | 8           | 0      | 609.498         | 8              | CCOC(=O)C1=C(N=C2n(c1=O)/c=C/c3ccc(cc3)c4ccc(cc4)Br)/s2)[C@H]1c5ccc(cc5)OC]C             |
| ZINC00659617 | 5.18  | 1.73              | -13.76           | 0        | 7           | 0      | 470.572         | 7              | CCOC(=O)C1=C(N=C2n(c1=O)/c=C/c3ccc(cc3)/s2)[C@H]1c4ccc(cc4)OC]C                          |
| ZINC02235961 | 5.88  | 4.04              | -17.64           | 0        | 8           | 0      | 516.546         | 7              | CCc1cc2c(cc1OC)C(=O)c3ccc(cc3)OC]oc(c2=O)c4ccc5c4)OCCOC5]C                               |
| ZINC00659622 | 5.18  | 1.74              | -13.76           | 0        | 7           | 0      | 470.572         | 7              | CCOC(=O)C1=C(N=C2n(c1=O)/c=C/c3ccc(cc3)/s2)[C@H]1c4ccc(cc4)OC]C                          |
| ZINC06245601 | 4.98  | 8.84              | -19.21           | 1        | 6           | 0      | 476.023         | 9              | Cc1ccc(cc1)S(=O)(=O)N(C)C(=O)NCCSc2ccc2)c3ccc(cc3)C1                                     |
| ZINC08440370 | 6.15  | -1.59             | -19.45           | 1        | 5           | 0      | 532.413         | 4              | CC1=NC2=C([C@@H]1[C]C(=O)N3ccc(cc3)Br)A4ccc(c4)F]C(=O)C[C@@H]1C2)c5cccc5                 |
| ZINC08440370 | 6.15  | -1.46             | -18.32           | 1        | 5           | 0      | 532.413         | 4              | CC1=NC2=C([C@@H]1[C]C(=O)N3ccc(cc3)Br)A4ccc(c4)F]C(=O)C[C@@H]1C2)c5cccc5                 |
| ZINC08440370 | 6.33  | -1.5              | -17.27           | 1        | 5           | 0      | 532.413         | 4              | C=C1C([C@@H]1[C@@H]2[C(=N1)]C[C@H](CC2=O)c3ccc(cc3)c4ccc(cc4)F)C(=O)Nc5ccc(cc5)Br        |
| ZINC08440370 | 6.33  | -0.63             | -17.96           | 1        | 5           | 0      | 532.413         | 4              | C=C1C([C@@H]1[C@@H]2[C(=N1)]C[C@H](CC2=O)c3ccc(cc3)c4ccc(cc4)F)C(=O)Nc5ccc(cc5)Br        |
| ZINC08440369 | 7.04  | 10.24             | -8.15            | 2        | 4           | 0      | 445.733         | 5              | c1ccc(cc1c2c[nH]nc2c3ccc(cc3)OC4ccc(cc4)C1)C1                                            |
| ZINC02062287 | 5.86  | 0.54              | -16.56           | 0        | 3           | 0      | 432.353         | 3              | c1ccc(cc1)C]c2ccc(o2)/C=C\3/C(=O)N(C=S)S3)c4ccc(cc4)C1                                   |
| ZINC08440368 | 8.76  | 3.4               | -13.96           | 0        | 5           | 0      | 643.95          | 10             | c1ccc(cc1)COc2ccc(cc2)c3ccc4ccc(cc4c3=O)OCc5cccc5)OC6cccc6C1]C1                          |
| ZINC08440366 | 5.78  | 4.13              | -16.12           | 0        | 5           | 0      | 422.864         | 8              | COc1ccc(cc1OC)C(=O)Oc2ccc(cc2)C(=O)/C=C/c3ccc(cc3)C                                      |
| ZINC00659595 | 4.78  | 0.04              | -20.58           | 1        | 7           | 0      | 438.867         | 6              | COc1ccc(cc1OC)C(=O)Nc2ccc(cc2)c3cnc4cccc4n3)c5cccc5                                      |
| ZINC08440365 | 6.2   | 14.47             | -16.85           | 2        | 5           | 0      | 532.413         | 4              | CC1=C([C@@H]1C2=C(N1)C[C@@H](CC2=O)c3ccc(cc3)c4ccc(cc4)F)C(=O)Nc5ccc(cc5)Br              |

Supplementary Table S2:

Detailed table of XP Docking using Schrodinger's Glide module

| ZINC_ID      | xLogP | ApolarDesolvation | PolarDesolvation | H Donors | H Acceptors | Charge | MolecularWeight | RotatableBonds | SMILES                                                                         |
|--------------|-------|-------------------|------------------|----------|-------------|--------|-----------------|----------------|--------------------------------------------------------------------------------|
| ZINC08440365 | 6.33  | -0.18             | -12.51           | 1        | 5           | 0      | 532.413         | 4              | C=C1C([C@@H]([C@@H]2C(=N1)C[C@@H](CC2=O)c3cccc3)c4cccc(c4)F)C(=O)Nc5ccc(cn5)Br |
| ZINC08440365 | 6.33  | -1.43             | -13.94           | 1        | 5           | 0      | 532.413         | 4              | C=C1C([C@@H]([C@@H]2C(=N1)C[C@@H](CC2=O)c3cccc3)c4cccc(c4)F)C(=O)Nc5ccc(cn5)Br |
| ZINC08440365 | 6.15  | -0.82             | -15.51           | 1        | 5           | 0      | 532.413         | 4              | CC1=C([C@@H]([C@@H]2C(=N1)C[C@@H](CC2=O)c3cccc3)c4cccc(c4)F)C(=O)Nc5ccc(cn5)Br |
| ZINC08440364 | 4.95  | 0                 | -20.29           | 1        | 7           | 0      | 432.476         | 6              | Cc1cc2c(cc1)oc(n2)c3cccc3)Nc1=O)c4ccc(c4)OC)OC)OC                              |
| ZINC06159425 | 4.48  | 10.54             | -45.68           | 2        | 3           | 1      | 340.487         | 6              | CC(C)(C)c1ccc(cc1)OC[C@@H](C)NH+12CCc3cccc3C2)O                                |
| ZINC06159425 | 4.48  | 8.14              | -6.53            | 1        | 3           | 0      | 339.479         | 6              | CC(C)(C)c1ccc(cc1)OC[C@@H](C)NH+12CCc3cccc3C2)O                                |
| ZINC06059594 | 5.11  | 1                 | -12.53           | 0        | 3           | 0      | 409.61          | 3              | c1cc2ccn2c(c1)OC(=O)c3ccc3C1)I                                                 |
| ZINC06159424 | 4.48  | 10.29             | -46.03           | 2        | 3           | 1      | 340.487         | 6              | CC(C)(C)c1ccc(cc1)OC[C@@H](C)NH+12CCc3cccc3C2)O                                |
| ZINC06159424 | 4.48  | 7.83              | -6.51            | 1        | 3           | 0      | 339.479         | 6              | CC(C)(C)c1ccc(cc1)OC[C@@H](C)NH+12CCc3cccc3C2)O                                |
| ZINC0262267  | 5.99  | -1.5              | -17.35           | 1        | 5           | 0      | 457.711         | 4              | C0c1ccc(cc1)C(=O)Nc2ccc3c(c2)nc(o3)c4ccc(cc4)Br                                |
| ZINC0262266  | 7.21  | -1.82             | -17.07           | 1        | 4           | 0      | 496.575         | 3              | c1ccc(cc1)C(=O)Nc2ccc3c(c2)nc(o3)c4ccc(cc4)Br)Cl                               |
| ZINC08440363 | 6.35  | -1.22             | -16.52           | 1        | 4           | 0      | 441.712         | 3              | Cc1cccc(c1)C(=O)Nc2ccc3c(c2)nc(o3)c4ccc(cc4)Br                                 |
| ZINC05917882 | 6.19  | -1.64             | -20.3            | 2        | 5           | 0      | 522.468         | 4              | CC1(CC2=C([C@@H](c3c(=O)nh)c(nc3N2)SC4cccc4)c5ccc(cc5)Br)C(=O)C1)C             |
| ZINC0262265  | 6.31  | -2.08             | -13.18           | 1        | 5           | 0      | 471.738         | 5              | CCOc1ccc(cc1)Br)C(=O)Nc2ccc3c(c2)nc(o3)c4cccc4F                                |
| ZINC06059590 | 5.8   | -1.29             | -16.46           | 1        | 5           | 0      | 455.283         | 5              | CCOc1ccc(cc1)Br)C(=O)Nc2ccc3c(c2)nc(o3)c4cccc4F                                |
| ZINC05917844 | 6.19  | -1.64             | -20.11           | 2        | 5           | 0      | 522.468         | 4              | CC1(CC2=C([C@@H](c3c(=O)nh)c(nc3N2)SC4cccc4)c5ccc(cc5)Br)C(=O)C1)C             |
| ZINC08440361 | 6.15  | -1.65             | -18.96           | 1        | 5           | 0      | 532.413         | 4              | CC1=NC2=C([C@@H](C1C(=O)Nc3ccc(cn3)Br)c4cccc(c4)F)C(=O)C[C@@H](C2)c5cccc5      |
| ZINC08440361 | 6.33  | -1.45             | -17.46           | 1        | 5           | 0      | 532.413         | 4              | C=C1C([C@@H]([C@@H]2C(=N1)C[C@@H](CC2=O)c3cccc3)c4cccc(c4)F)C(=O)Nc5ccc(cn5)Br |
| ZINC08440361 | 6.33  | -0.14             | -33.22           | 1        | 5           | 0      | 532.413         | 4              | C=C1C([C@@H]([C@@H]2C(=N1)C[C@@H](CC2=O)c3cccc3)c4cccc(c4)F)C(=O)Nc5ccc(cn5)Br |
| ZINC02252650 | 6.17  | 8.32              | -16.64           | 2        | 4           | 0      | 415.301         | 3              | c1ccc2c(c1)nc(s2)c3ccc(cc3)N(C=O)c4ccc(cc4)Cl                                  |
| ZINC0702484  | 3.81  | 8.6               | -35.77           | 2        | 7           | 0      | 441.553         | 5              | CCSc1nH1e2c(c(=O)n1)[C@@H](C3=C(N2)CC(C3=O)(C)C)c4ccc(c(=O)OC)OC               |
| ZINC0702484  | 4.26  | 7.23              | -63.43           | 1        | 7           | -1     | 440.545         | 5              | CCSc1nc2c(c(n1)O-)[C@@H](C3=C(N2)CC(C3=O)(C)C)c4ccc(c(=O)OC)OC                 |
| ZINC0262260  | 7.17  | -0.72             | -20.54           | 1        | 5           | 0      | 436.511         | 7              | CCOCc1ccc(cc1)C(=O)Nc2ccc3c(c2)nc(o3)c4cccc5c4cccc5                            |
| ZINC0262259  | 7.49  | -2.46             | -11.83           | 1        | 4           | 0      | 569.196         | 3              | c1ccc2c(c1)cccc2c3nc4cc(c4)NC(=O)c5ccc(cc5)Br                                  |
| ZINC0702480  | 5.07  | -1.36             | -17.99           | 2        | 5           | 0      | 436.364         | 2              | CC1(CC2=C([C@@H](c3c(=O)nh)c(nc3N2)SC4cccc4)c5ccc(cc5)Br)C(=O)C1)C             |
| ZINC08440359 | 9.74  | 1.85              | -13.06           | 1        | 3           | 0      | 535.046         | 5              | c1ccc(cc1)e2c(nc([nH]2)c3c4cccc4c5c3cccc5)Cl)c6ccc(cc6)C(=O)c7cccc7            |
| ZINC08440359 | 9.74  | 1.94              | -34.41           | 2        | 3           | 1      | 536.054         | 5              | c1ccc(cc1)e2c(nc([nH]2)c3c4cccc4c5c3cccc5)Cl)c6ccc(cc6)C(=O)c7cccc7            |
| ZINC08740856 | 7.82  | 15.26             | -8.24            | 1        | 3           | 0      | 429.915         | 5              | c1ccc(cc1)e2c(nc([nH]2)c3ccc(cc3)Cl)c4ccc(cc4)O5cccc5                          |
| ZINC08740856 | 7.82  | 15.64             | -32.91           | 2        | 3           | 1      | 429.923         | 5              | c1ccc(cc1)e2c(nc([nH]2)c3ccc(cc3)Cl)c4ccc(cc4)O5cccc5                          |
| ZINC0262255  | 6.43  | 4.86              | -9.06            | 0        | 6           | 0      | 448.563         | 9              | CCOC(=O)C1=C(N(C=C1)C2=CC(=O)N(C)C)C(=O)OC(C)C3=CC=CC=C3                       |
| ZINC0702481  | 5.07  | -1.36             | -17.98           | 2        | 5           | 0      | 436.364         | 2              | CC1(CC2=C([C@@H](c3c(=O)nh)c(nc3N2)SC4cccc4)c5ccc(cc5)Br)C(=O)C1)C             |
| ZINC08440357 | 5.01  | 0.65              | -14.68           | 0        | 6           | 0      | 450.56          | 11             | CCOc1ccc1OCc2c3cccc3nc2SC0c4cccc4OC                                            |
| ZINC08440356 | 7.7   | 2.41              | -13.97           | 0        | 6           | 0      | 610.961         | 6              | CCOC(=O)C1=C(N=C2n(c(=O)/c=C/c3ccc(nc3C)c4ccc(cc4)Br)C)/S2)[C@@H]1c5cccc5Cl)C  |
| ZINC08440355 | 7.32  | 18.41             | -19.74           | 1        | 7           | 0      | 562.666         | 8              | CCOC(=O)C1=C(N=C2n(c(=O)/c=C/c3ccc(nc3C)c4ccc(cc4)Br)C)/S2)[C@@H]1c5cccc5Cl)C  |
| ZINC08440354 | 7.7   | 2.41              | -14.77           | 0        | 6           | 0      | 610.961         | 6              | CCOC(=O)C1=C(N=C2n(c(=O)/c=C/c3ccc(nc3C)c4ccc(cc4)Br)C)/S2)[C@@H]1c5cccc5Cl)C  |
| ZINC08440353 | 9.5   | 2.6               | -11.47           | 0        | 6           | 0      | 735.103         | 8              | CCOC(=O)C1=C(N=C2n(c(=O)/c=C/c3ccc(nc3C)c4ccc(cc4)Br)C)/S2)[C@@H]1c7cccc7Cl)C  |
| ZINC0702477  | 4.64  | 10.83             | -33.95           | 2        | 6           | 0      | 438.597         | 5              | CCN(CC)c1ccc(cc1)[C@@H]2c3c([nH](nc3=O)SC)NC4=C2C(=O)CC(C4)C                   |
| ZINC0702477  | 5.09  | 9.56              | -63.99           | 2        | 6           | 0      | 438.597         | 5              | CCN(CC)c1ccc(cc1)[C@@H]2c3c([nH](nc3=O)SC)NC4=C2C(=O)CC(C4)C                   |
| ZINC0702477  | 5.09  | 9.45              | -64.49           | 1        | 6           | -1     | 437.589         | 5              | CCN(CC)c1ccc(cc1)[C@@H]2c3c([nH](nc3=O)SC)NC4=C2C(=O)CC(C4)C                   |
| ZINC0702477  | 4.64  | 10.94             | -64.89           | 3        | 6           | 0      | 439.605         | 5              | CCN(CC)c1ccc(cc1)[C@@H]2c3c([nH](nc3=O)SC)NC4=C2C(=O)CC(C4)C                   |
| ZINC0702474  | 5.16  | 11.77             | -33.77           | 2        | 6           | 0      | 459.571         | 6              | CCSc1[nH]e2c(c(=O)n1)[C@@H](C3=C(N2)CC(C3=O)c4ccc(cc4)OC5cccc5                 |
| ZINC0702474  | 5.62  | 10.39             | -63.18           | 1        | 6           | -1     | 458.563         | 6              | CCSc1nc2c(c(n1)O-)[C@@H](C3=C(N2)CC(C3=O)c4ccc(cc4)OC5cccc5                    |
| ZINC08440352 | 9.5   | 2.64              | -14.07           | 0        | 6           | 0      | 735.103         | 8              | CCOC(=O)C1=C(N=C2n(c(=O)/c=C/c3ccc(nc3C)c4ccc(cc4)Br)C)/S2)[C@@H]1c5cccc5Cl)C  |
| ZINC0702475  | 5.16  | 11.76             | -33.85           | 2        | 6           | 0      | 459.571         | 6              | CCSc1[nH]e2c(c(=O)n1)[C@@H](C3=C(N2)CC(C3=O)c4ccc(cc4)OC5cccc5                 |
| ZINC0702475  | 5.62  | 10.38             | -63.38           | 1        | 6           | -1     | 458.563         | 6              | CCSc1nc2c(c(n1)O-)[C@@H](C3=C(N2)CC(C3=O)c4ccc(cc4)OC5cccc5                    |
| ZINC06059579 | 6.46  | 1.22              | -14.43           | 0        | 6           | 0      | 507.793         | 5              | CCOC(=O)C1=C(N=C2n(c(=O)/c=C/c3ccc(o3)Br)/S2)[C@@H]1c4cccc4Cl)C                |
| ZINC06059581 | 6.46  | 1.23              | -14.34           | 0        | 6           | 0      | 507.793         | 5              | CCOC(=O)C1=C(N=C2n(c(=O)/c=C/c3ccc(o3)Br)/S2)[C@@H]1c4cccc4Cl)C                |
| ZINC0823055  | 5.74  | 2.32              | -13.78           | 0        | 6           | 0      | 442.924         | 5              | CCOC(=O)C1=C(N=C2n(c(=O)/c=C/c3ccc(o3)Br)/S2)[C@@H]1c4cccc4Cl)C                |
| ZINC08440351 | 6.43  | -0.72             | -22.68           | 2        | 5           | 0      | 492.044         | 4              | Cc1cccc(c1)[C@@H]2c3c(=O)nh)c(nc3NC4=C2C(=O)CC(C4)C)SC5cccc5Cl                 |
| ZINC0823057  | 5.74  | 2.31              | -14.58           | 0        | 6           | 0      | 442.924         | 5              | CCOC(=O)C1=C(N=C2n(c(=O)/c=C/c3ccc(o3)Br)/S2)[C@@H]1c4cccc4Cl)C                |
| ZINC0262206  | 7.38  | 2.8               | -26.97           | 0        | 10          | 0      | 580.018         | 8              | CCOC(=O)C1=C(N=C2n(c(=O)/c=C/c3ccc(o3)c4ccc(cc4)N+([=O])O)SC2)C(=O)C1)C        |
| ZINC0262208  | 7.38  | 2.84              | -25.75           | 0        | 10          | 0      | 580.018         | 8              | CCOC(=O)C1=C(N=C2n(c(=O)/c=C/c3ccc(o3)c4ccc(cc4)N+([=O])O)SC2)C(=O)C1)C        |
| ZINC08440350 | 6.43  | -0.72             | -23.03           | 2        | 5           | 0      | 492.044         | 4              | Cc1cccc(c1)[C@@H]2c3c(=O)nh)c(nc3NC4=C2C(=O)CC(C4)C)SC5cccc5Cl                 |
| ZINC08440349 | 7.32  | 19.33             | -2.3             | 1        | 7           | 0      | 562.666         | 8              | CCOC(=O)C1=C(N=C2n(c(=O)/c=C/c3ccc(nc3C)c4ccc(cc4)Br)C)/S2)[C@@H]1c5cccc5Cl)C  |
| ZINC0262198  | 8.25  | 1.63              | -16.07           | 0        | 6           | 0      | 583.891         | 6              | CCOC(=O)C1=C(N=C2n(c(=O)/c=C/c3ccc(o3)c4ccc(cc4)Br)/S2)[C@@H]1c5cccc5Cl)C      |
| ZINC0262200  | 8.25  | 1.68              | -15.91           | 0        | 6           | 0      | 583.891         | 6              | CCOC(=O)C1=C(N=C2n(c(=O)/c=C/c3ccc(o3)c4ccc(cc4)Br)/S2)[C@@H]1c5cccc5Cl)C      |
| ZINC0262194  | 7.26  | 14.18             | -5.87            | 0        | 2           | 0      | 424.371         | 2              | C(C@@1(C)CC(N(c2c1cccc2)C(=O)c3ccc(cc3)Cl)C)C)c4cccc4                          |
| ZINC0262195  | 7.26  | 14.16             | -5.78            | 0        | 2           | 0      | 424.371         | 2              | C(C@@1(C)CC(N(c2c1cccc2)C(=O)c3ccc(cc3)Cl)C)C)c4cccc4                          |
| ZINC05917888 | 7.66  | -0.85             | -24.06           | 2        | 6           | 0      | 584.141         | 7              | CC1(CC2=C([C@@H](c3c(=O)nh)c(nc3N2)SC4cccc4)c5ccc(cc5)OC6cccc6)C(=O)C1)C       |
| ZINC0262192  | 6.97  | -1.55             | -12.74           | 1        | 5           | 0      | 506.183         | 5              | CCOc1ccc(cc1)Br)C(=O)Nc2ccc3c(c2)nc(o3)c4ccc(cc4)Cl                            |
| ZINC05917848 | 7.66  | -0.85             | -24.44           | 2        | 6           | 0      | 584.141         | 7              | CC1(CC2=C([C@@H](c3c(=O)nh)c(nc3N2)SC4cccc4)c5ccc(cc5)OC6cccc6)C(=O)C1)C       |





Supplementary Table S2:

Detailed table of XP Docking using Schrodinger's Glide module

| ZINC_ID      | sLogP | ApolarDesolvation | PolarDesolvation | H Donors | H Acceptors | Charge | MolecularWeight | RotatableBonds | SMILES                                                                                    |
|--------------|-------|-------------------|------------------|----------|-------------|--------|-----------------|----------------|-------------------------------------------------------------------------------------------|
| ZINC08440295 | 5.06  | 14.91             | -35.09           | 2        | 6           | 1      | 524.453         | 6              | c1ccc(cc1)[C@H]2CC(=NN2C(=NH2+))S[C@@H]3CC(=O)N(C3=O)c4ccc(c4)C1)c5ccccc5                 |
| ZINC08440294 | 5.06  | 14.91             | -36.77           | 2        | 6           | 1      | 524.453         | 6              | c1ccc(cc1)[C@@H]2CC(=NN2C(=NH2+))S[C@@H]3CC(=O)N(C3=O)c4ccc(c4)C1)c5ccccc5                |
| ZINC08440293 | 5.69  | 11.98             | -8.54            | 0        | 2           | 0      | 540.178         | 2              | C[C@]12C[C@H]([C@H]1)C[C@H]2C(=O)[C@@]34CC[C@@]1([C@@H]3Br)(C4)C(C)C(Br)Br                |
| ZINC02666666 | 4.36  | -1.91             | -4.37            | 1        | 2           | 0      | 446.021         | 4              | CCN(C(=O)[C@]12CC[C@]1([C@@H]1Br)(C2)C(C)C(Br)Br                                          |
| ZINC08440288 | 5.06  | 14.95             | -34.21           | 2        | 6           | 1      | 524.453         | 6              | c1ccc(cc1)[C@H]2CC(=NN2C(=NH2+))S[C@@H]3CC(=O)N(C3=O)c4ccc(cc4)C1)c5ccccc5                |
| ZINC08440287 | 5.06  | 14.95             | -35.74           | 2        | 6           | 1      | 524.453         | 6              | c1ccc(cc1)[C@@H]2CC(=NN2C(=NH2+))S[C@@H]3CC(=O)N(C3=O)c4ccc(cc4)C1)c5ccccc5               |
| ZINC08440286 | 5.58  | -1.81             | -11.91           | 1        | 7           | 0      | 574.475         | 6              | CC1=NC2=C([C@H]1)C(=O)Nc3ccc(cn3)Br4ccc(cc4OC)C(=O)C[C@H](C2)c5ccccc5                     |
| ZINC08440286 | 5.76  | -0.33             | -19.39           | 1        | 7           | 0      | 574.475         | 6              | COc1ccc(c1OC)[C@@H]2[C@H]3C(=NC(=C)C2)C(=O)Nc4ccc(cn4)Br[C@@H](CC3=O)c5ccccc5             |
| ZINC08440286 | 5.76  | -1.58             | -13.53           | 1        | 7           | 0      | 574.475         | 6              | COc1ccc(c1OC)[C@@H]2[C@H]3C(=NC(=C)C2)C(=O)Nc4ccc(cn4)Br[C@@H](CC3=O)c5ccccc5             |
| ZINC00659536 | 4.77  | -1.09             | -9.04            | 1        | 5           | 0      | 496.304         | 5              | c1ccc(cc1)COC2CCCC2/C=C\3/C(=O)NN(C3=O)c4ccc(cc4)1                                        |
| ZINC08440285 | 4.36  | -1.7              | -8.53            | 1        | 2           | 0      | 446.021         | 4              | CCN(C(=O)[C@]12CC[C@]1([C@@H]1Br)(C2)C(C)C(Br)Br                                          |
| ZINC00659531 | 6.43  | 3.34              | -18.09           | 0        | 5           | 0      | 550.433         | 4              | CCOC1cc(cc1OC)C2C3=C(CC(C3=O)C)C(OC4=C2C(=O)CC(C4)C)C                                     |
| ZINC02062159 | 8.18  | 0.58              | -8.58            | 1        | 3           | 0      | 528.479         | 4              | CC1(CC2=C([C@@H]1)Nc3c2c4ccc4cc3)c5ccc(cc5)OC6ccc(cc6C)C(=O)C1C                           |
| ZINC02062160 | 8.18  | 0.57              | -8.93            | 1        | 3           | 0      | 528.479         | 4              | CC1(CC2=C([C@@H]1)Nc3c2c4ccc4cc3)c5ccc(cc5)OC6ccc(cc6C)C(=O)C1C                           |
| ZINC08440284 | 5.24  | 0.85              | -27.41           | 2        | 5           | 0      | 438.474         | 9              | CCCCOc1ccc(cc1)C(NC(=O)c2ccc2F)NC(=O)c3ccc3F                                              |
| ZINC08440282 | 5.3   | -0.58             | -10.89           | 1        | 5           | 0      | 517.15          | 4              | CCOC1cc(cc1O)C/C=C\2/C(=NN(C2=O)c3ccc(c3)C)C1C                                            |
| ZINC05946144 | 6.1   | -1.6              | -12.79           | 3        | 4           | 0      | 478.795         | 12             | CCCCCCC(=O)N[C@@H](C(C)C)C(NC(=S)Nc1ccc(c1)C)F(F)F                                        |
| ZINC05946142 | 6.1   | 10.61             | -16.98           | 3        | 4           | 0      | 478.795         | 12             | CCCCCCC(=O)N[C@@H](C(C)C)C(NC(=S)Nc1ccc(c1)C)F(F)F                                        |
| ZINC00659496 | 4.58  | -0.23             | -17.88           | 1        | 6           | 0      | 518.742         | 3              | CC1c(c[n1])c2ccc(cc2)O)/C=C\3/C(=NN(C3=O)c4ccc(cc4)C)C                                    |
| ZINC08440274 | 4.56  | 9.24              | -18.43           | 2        | 8           | 0      | 511.003         | 7              | Cc1ccc(c1NS(=O)=O)c2ccc(c2)OCN/C=C\3/C(=NN(C3=O)c4ccc(cc4)C)C                             |
| ZINC08440274 | 4.56  | 9.21              | -22.37           | 2        | 8           | 0      | 511.003         | 7              | Cc1ccc(c1NS(=O)=O)c2ccc(c2)OCN/C=C\3/C(=NN(C3=O)c4ccc(cc4)C)C                             |
| ZINC08440274 | 4.56  | 9.27              | -53.12           | 1        | 8           | -1     | 509.995         | 7              | Cc1ccc(c1N-[S](=O)=O)c2ccc(c2)OCN/C=C\3/C(=NN(C3=O)c4ccc(cc4)C)C                          |
| ZINC08440274 | 4.56  | 9.29              | -49.42           | 1        | 8           | -1     | 509.995         | 7              | Cc1ccc(c1N-[S](=O)=O)c2ccc(c2)OCN/C=C\3/C(=NN(C3=O)c4ccc(cc4)C)C                          |
| ZINC08440273 | 4.61  | 9.17              | -18.59           | 2        | 8           | 0      | 511.003         | 7              | Cc1ccc(c1NS(=O)=O)c2ccc(c2)OCN/C=C\3/C(=NN(C3=O)c4ccc(cc4)C)C                             |
| ZINC08440273 | 4.61  | 9.14              | -23.08           | 2        | 8           | 0      | 511.003         | 7              | Cc1ccc(c1NS(=O)=O)c2ccc(c2)OCN/C=C\3/C(=NN(C3=O)c4ccc(cc4)C)C                             |
| ZINC08440273 | 4.61  | 9.19              | -53.84           | 1        | 8           | -1     | 509.995         | 7              | Cc1ccc(c1N-[S](=O)=O)c2ccc(c2)OCN/C=C\3/C(=NN(C3=O)c4ccc(cc4)C)C                          |
| ZINC08440273 | 4.61  | 9.21              | -50.11           | 1        | 8           | -1     | 509.995         | 7              | Cc1ccc(c1N-[S](=O)=O)c2ccc(c2)OCN/C=C\3/C(=NN(C3=O)c4ccc(cc4)C)C                          |
| ZINC08440272 | 5.92  | -2.66             | -15.39           | 3        | 4           | 0      | 596.627         | 8              | c1cc(cc1)C(=O)N[C@@H](C(C)C)C(NC(=S)Nc2ccc(c2)C)F(F)F                                     |
| ZINC00659475 | 4.39  | 0.32              | -18.2            | 1        | 6           | 0      | 518.742         | 3              | CC1c(c[n1])c2ccc(cc2)O)/C=C\3/C(=NN(C3=O)c4ccc(cc4)C)C                                    |
| ZINC08440271 | 6.19  | -1.01             | -22.24           | 1        | 7           | 0      | 544.051         | 7              | Cc1ccc(c1NC(=O)C2[C@@H]1(C3=C(CCC3=O)N=C2)c4ccc(c4)COC5ccc(cc5)C)OC                       |
| ZINC08440271 | 6.19  | -1.39             | -22.17           | 1        | 7           | 0      | 544.051         | 7              | Cc1ccc(c1NC(=O)C2=C(N=C3CCC(=O)C3)C@H]2c4ccc(c4)COC5ccc(cc5)C)OC                          |
| ZINC08440271 | 6.37  | -2.24             | -20.73           | 1        | 7           | 0      | 544.051         | 7              | Cc1ccc(c1NC(=O)C2[C@@H]1(C3=C(NC2=O)CCC3=O)c4ccc(c4)COC5ccc(cc5)C)OC                      |
| ZINC08440270 | 5.92  | -2.66             | -11.6            | 3        | 4           | 0      | 596.627         | 8              | c1cc(cc1)C(=O)N[C@@H](C(C)C)C(NC(=S)Nc2ccc(c2)C)F(F)F                                     |
| ZINC08440264 | 4.85  | -0.66             | -18.92           | 2        | 6           | 0      | 473.356         | 8              | COc1ccc(cc1OC)C(NC(=O)c2ccc(c2)C)NC(=O)c3ccc(c3)C                                         |
| ZINC08440259 | 6.23  | 14.2              | -31.49           | 2        | 7           | 0      | 544.051         | 7              | Cc1ccc(c1NC(=O)C2=C(NC3=C([C@@H]2c4ccc(c4)COC5ccc(cc5)C)OC)C(=O)CCC3)C                    |
| ZINC08440259 | 6.37  | -1.84             | -15.82           | 1        | 7           | 0      | 544.051         | 7              | Cc1ccc(c1NC(=O)C2[C@@H]1(C3=C(NC2=O)CCC3=O)c4ccc(c4)COC5ccc(cc5)C)OC                      |
| ZINC08440258 | 7.86  | -4.46             | -17.76           | 1        | 6           | 0      | 572.486         | 10             | c1ccc(cc1)C(c2ccc2)c3ncf(c3)Nc4ccc(c4)Oc5ccc5S(=O)(=O)c6ccc6                              |
| ZINC08440257 | 4.52  | 9.08              | -25.18           | 2        | 8           | 0      | 490.585         | 7              | Cc1ccc(cc1)N2C(=O)/C=C/Nc3ccc(cc3OC)S(=O)(=O)Nc4ccc4/C(=N2)C                              |
| ZINC08440257 | 4.52  | 9.21              | -20.96           | 2        | 8           | 0      | 490.585         | 7              | Cc1ccc(cc1)N2C(=O)/C=C/Nc3ccc(cc3OC)S(=O)(=O)Nc4ccc4/C(=N2)C                              |
| ZINC00702456 | 5.19  | -3.05             | -15.03           | 3        | 6           | 0      | 509.242         | 10             | CCOC(=O)c1ccc(cc1)NC(=S)N[C@@H](C(C)C)C(NC(=O)c2ccc(c2)C)C                                |
| ZINC00702455 | 5.19  | -3.05             | -16.9            | 3        | 6           | 0      | 509.242         | 10             | CCOC(=O)c1ccc(cc1)NC(=S)N[C@@H](C(C)C)C(NC(=O)c2ccc(c2)C)C                                |
| ZINC08440254 | 3.79  | -2.07             | -19.94           | 3        | 9           | 0      | 550.848         | 12             | COc1ccc(cc1OC)C(=O)N[C@@H](C(C)C)C(NC(=S)Nc2ccc(cc2)C(=O)OC                               |
| ZINC08440253 | 6.48  | 15.62             | -21.39           | 1        | 9           | 0      | 585.653         | 12             | CCOC(=O)[C@@H]1[C@@H](CC2=C(C1=O)[C@@H]1(C(=N2)C)C(=O)OC)c3ccc(c3)COC4ccc(cc4)OC)c5ccccc5 |
| ZINC08440253 | 6.44  | 2.16              | -13.33           | 0        | 9           | 0      | 585.653         | 12             | CCOC(=O)[C@@H]1[C@@H](CC2=C(C1=O)[C@@H]1(C(=N2)C)C(=O)OC)c3ccc(c3)COC4ccc(cc4)OC)c5ccccc5 |
| ZINC08440253 | 6.6   | 3.47              | -18.45           | 0        | 9           | 0      | 585.653         | 12             | CCOC(=O)[C@@H]1[C@@H](C=C2C(C1=O)[C@@H]1(C(=N2)C)C(=O)OC)c3ccc(c3)COC4ccc(cc4)OC)c5ccccc5 |
| ZINC08440253 | 6.6   | 2.06              | -13.05           | 0        | 9           | 0      | 585.653         | 12             | CCOC(=O)[C@@H]1[C@@H](C=C2C(C1=O)[C@@H]1(C(=N2)C)C(=O)OC)c3ccc(c3)COC4ccc(cc4)OC)c5ccccc5 |
| ZINC08440248 | 3.79  | -2.07             | -19.84           | 3        | 9           | 0      | 550.848         | 12             | COc1ccc(cc1OC)C(=O)N[C@@H](C(C)C)C(NC(=S)Nc2ccc(cc2)C(=O)OC                               |
| ZINC08440246 | 4.33  | 9.39              | -20.55           | 2        | 8           | 0      | 490.585         | 7              | Cc1ccc(cc1)N2C(=O)/C=C/Nc3ccc(cc3OC)S(=O)(=O)Nc4ccc4/C(=N2)C                              |
| ZINC08440246 | 4.33  | 9.37              | -25.05           | 2        | 8           | 0      | 490.585         | 7              | Cc1ccc(cc1)N2C(=O)/C=C/Nc3ccc(cc3OC)S(=O)(=O)Nc4ccc4/C(=N2)C                              |
| ZINC08440246 | 4.33  | 9.42              | -55.65           | 1        | 8           | -1     | 489.577         | 7              | Cc1ccc(cc1)N2C(=O)/C=C/Nc3ccc(cc3OC)S(=O)(=O)N-[c4ccc4C]/C(=N2)C                          |
| ZINC08440246 | 4.33  | 9.45              | -51.9            | 1        | 8           | -1     | 489.577         | 7              | Cc1ccc(cc1)N2C(=O)/C=C/Nc3ccc(cc3OC)S(=O)(=O)N-[c4ccc4C]/C(=N2)C                          |
| ZINC00702452 | 5.05  | -3.4              | -17.88           | 3        | 5           | 0      | 494.831         | 8              | CC(=O)c1ccc(cc1)NC(=S)N[C@@H](C(C)C)C(NC(=O)c2ccc3c2ccc3                                  |
| ZINC08440243 | 3.99  | 10.08             | -13.4            | 1        | 5           | 0      | 450.134         | 3              | Cc1ccc(cc1)N2C(=O)/C=C/Nc3ccc(cc3)Br)Br/C(=N2)C                                           |
| ZINC08440243 | 3.99  | 10.11             | -12.91           | 1        | 5           | 0      | 450.134         | 3              | Cc1ccc(cc1)N2C(=O)/C=C/Nc3ccc(cc3)Br)Br/C(=N2)C                                           |
| ZINC00830700 | 3.55  | 0.78              | -16.5            | 1        | 7           | 0      | 494.576         | 4              | Cc1ccc(cc1)n2c(c(c(n2)C)C=C3C(=O)N(C(=S)N(C3=O)c4ccc4)c5ccccc5)O                          |
| ZINC08440241 | 6.48  | 16.45             | -21.34           | 1        | 9           | 0      | 585.653         | 12             | CCOC(=O)[C@@H]1[C@@H](CC2=C(C1=O)[C@@H]1(C(=N2)C)C(=O)OC)c3ccc(c3)COC4ccc(cc4)OC)c5ccccc5 |
| ZINC08440241 | 6.6   | 4.14              | -27.6            | 0        | 9           | 0      | 585.653         | 12             | CCOC(=O)[C@@H]1[C@@H](CC2=C(C1=O)[C@@H]1(C(=N2)C)C(=O)OC)c3ccc(c3)COC4ccc(cc4)OC)c5ccccc5 |
| ZINC08440241 | 6.6   | 2.5               | -12.7            | 0        | 9           | 0      | 585.653         | 12             | CCOC(=O)[C@@H]1[C@@H](C=C2C(C1=O)[C@@H]1(C(=N2)C)C(=O)OC)c3ccc(c3)COC4ccc(cc4)OC)c5ccccc5 |
| ZINC00702451 | 5.05  | -3.44             | -18.13           | 3        | 5           | 0      | 494.831         | 8              | CC(=O)c1ccc(cc1)NC(=S)N[C@@H](C(C)C)C(NC(=O)c2ccc3c2ccc3                                  |
| ZINC08440238 | 4.63  | -3.43             | -15.96           | 3        | 5           | 0      | 438.808         | 11             | CCCCC(=O)N[C@@H](C(C)C)C(NC(=S)Nc1ccc(cc1)C(=O)C                                          |
| ZINC08440235 | 4.63  | -3.43             | -15.61           | 3        | 5           | 0      | 438.808         | 11             | CCCCC(=O)N[C@@H](C(C)C)C(NC(=S)Nc1ccc(cc1)C(=O)C                                          |



Supplementary Table S2:

Detailed table of XP Docking using Schrodinger's Glide module

| ZINC_ID      | xLogP | ApolarDesolvation | PolarDesolvation | H Donors | H Acceptors | Charge | MolecularWeight | RotatableBonds | SMILES                                                                            |
|--------------|-------|-------------------|------------------|----------|-------------|--------|-----------------|----------------|-----------------------------------------------------------------------------------|
| ZINC00702440 | 4.72  | 12.19             | -60.43           | 1        | 6           | -1     | 470.545         | 8              | CCOc1cc(ccc1O)[C@@H]2C=C(C(=O)N2CCc3cccc3)[O-]C(=O)c4ccc(ccc4)C                   |
| ZINC00702440 | 5.17  | -0.63             | -17.67           | 2        | 6           | 0      | 471.553         | 7              | CCOc1cc(ccc1O)[C@@H]2/C=C(\c3ccc(cc3)C)/O/C(=O)C(=O)N2CCc4cccc4                   |
| ZINC00702440 | 4.14  | -0.48             | -14.58           | 1        | 6           | 0      | 471.553         | 8              | CCOc1cc(ccc1O)[C@@H]2[C@@H](C(=O)C(=O)N2CCc3cccc3)C(=O)c4ccc(ccc4)C               |
| ZINC00659345 | 4.25  | 3.14              | -35.09           | 1        | 8           | 0      | 506.488         | 5              | Cc1ccc(cc1)c2ccc(n3c2)c(cn3)C(=O)Nc4nc(n(c4=O)c5cccc5)C(C)C(F)F                   |
| ZINC00848684 | 4.75  | 1.85              | -21.04           | 1        | 7           | 0      | 440.381         | 4              | Cc1ccc(cc1)c2ccc(n3c2)c(cn3)C(=O)Nc4ccc5c(c4)OC05)C(F)F                           |
| ZINC00702437 | 4.84  | 13.1              | -53.98           | 0        | 6           | -1     | 446.552         | 5              | Cc1ccc(c(c1)C(=O)C2=C(C(=O)N(C@H)2c3ccc(cc3)C(C)C)c4nnc(s4)C)O-)C                 |
| ZINC00702437 | 5.29  | 1.74              | -16.13           | 1        | 6           | 0      | 447.56          | 4              | Cc1ccc(c(c1)C(=C)2/[C@@H](N(C(=O)C2=O)c3nnc(s3)C)c4ccc(cc4)C(C)C)/O/C             |
| ZINC00702437 | 5.29  | 1.4               | -22.17           | 1        | 6           | 0      | 447.56          | 4              | Cc1ccc(c(c1)C(=C)2/[C@@H](N(C(=O)C2=O)c3nnc(s3)C)c4ccc(cc4)C(C)C)/O/C             |
| ZINC00702437 | 4.26  | 1.64              | -16.23           | 0        | 6           | 0      | 447.56          | 5              | Cc1ccc(c(c1)C(=O)C2=C(C(=O)N(C@H)2[C@@H](N(C(=O)C2=O)c3nnc(s3)C)c4ccc(cc4)C(C)C)C |
| ZINC00848672 | 6.03  | 13.15             | -17.09           | 1        | 5           | 0      | 446.432         | 4              | Cc1ccc(cc1)c2ccc(n3c2)c(cn3)C(=O)Nc4ccc5c4cccc5)C(F)F                             |
| ZINC08440205 | 4.84  | 12.94             | -57.81           | 0        | 6           | -1     | 446.552         | 5              | Cc1ccc(c(c1)C(=O)C2=C(C(=O)N(C@H)2c3ccc(cc3)C(C)C)c4nnc(s4)C)O-)C                 |
| ZINC08440205 | 5.29  | 1.74              | -16.09           | 1        | 6           | 0      | 447.56          | 4              | Cc1ccc(c(c1)C(=C)2/[C@@H](N(C(=O)C2=O)c3nnc(s3)C)c4ccc(cc4)C(C)C)/O/C             |
| ZINC08440205 | 5.29  | 1.36              | -22.04           | 1        | 6           | 0      | 447.56          | 4              | Cc1ccc(c(c1)C(=C)2/[C@@H](N(C(=O)C2=O)c3nnc(s3)C)c4ccc(cc4)C(C)C)/O/C             |
| ZINC08440205 | 4.26  | 1.71              | -16.11           | 0        | 6           | 0      | 447.56          | 5              | Cc1ccc(c(c1)C(=O)C2=C(C(=O)N(C@H)2[C@@H](N(C(=O)C2=O)c3nnc(s3)C)c4ccc(cc4)C(C)C)C |
| ZINC08440204 | 6.43  | 16.29             | -19.18           | 2        | 6           | 0      | 536.031         | 5              | CC1=C([C@@H](C2=C(N1)C[C@H](CC2=O)c3cccc3)c4ccc(o4)c5cccc(c5)C)C(=O)Nc6cccc6      |
| ZINC08440204 | 6.57  | -1.52             | -12.69           | 1        | 6           | 0      | 536.031         | 5              | C=C1C([C@@H](C2=C(N1)C[C@H](CC2=O)c3cccc3)c4ccc(o4)c5cccc(c5)C)C(=O)Nc6cccc6      |
| ZINC08440204 | 6.57  | -0.23             | -13.72           | 1        | 6           | 0      | 536.031         | 5              | C=C1C([C@@H](C2=C(N1)C[C@H](CC2=O)c3cccc3)c4ccc(o4)c5cccc(c5)C)C(=O)Nc6cccc6      |
| ZINC00659343 | 4.87  | 1.44              | -18.84           | 1        | 9           | 0      | 520.851         | 6              | COc1ccc(cc1O)c2cc(n3c2)c(cn3)C(=O)Nc4ccc5c(c4)OC05)C)C(F)F                        |
| ZINC00702433 | 3.74  | 9.15              | -48.18           | 1        | 6           | -1     | 428.464         | 7              | COc1ccc(c(c1)C(=O)C2=C(C(=O)N(C@H)2c3ccc(cc3)O)C)c4cccc4)O-                       |
| ZINC00702433 | 4.18  | -1.52             | -29.3            | 2        | 6           | 0      | 429.472         | 6              | COc1ccc(c(c1)C(=O)C2=C(C(=O)N(C@H)2c3ccc(cc3)C)c4ccc(cc4)O                        |
| ZINC00702433 | 3.15  | -1.23             | -26.08           | 1        | 6           | 0      | 429.472         | 7              | COc1ccc(c(c1)C(=O)C2=C(C(=O)N(C@H)2[C@@H](N(C(=O)C2=O)CCc3cccc3)c4ccc(cc4)O       |
| ZINC08440203 | 4.82  | 3.04              | -51.4            | 1        | 8           | 1      | 506.984         | 7              | COc1ccc(cc1O)c2cc(n3c2)c(cn3)C(=O)N4CC[NH+][C4]C5cccc5)C(C)C(F)F                  |
| ZINC00659339 | 6.14  | 2.63              | -16.12           | 1        | 7           | 0      | 526.902         | 6              | COc1ccc(cc1O)c2cc(n3c2)c(cn3)C(=O)Nc4ccc5c4cccc5)C(C)C(F)F                        |
| ZINC00848599 | 6.15  | 13.43             | -11.56           | 0        | 6           | 0      | 520.342         | 4              | c1ccc(c1)N2CCN(CC2)C(=O)c3c4cnc(c4n3)C(F)F)c5ccc(cc5)C)C                          |
| ZINC00702434 | 3.74  | 8.74              | -46.24           | 1        | 6           | -1     | 428.464         | 7              | COc1ccc(c(c1)C(=O)C2=C(C(=O)N(C@H)2c3ccc(cc3)O)C)c4cccc4)O-                       |
| ZINC00702434 | 4.18  | -1.82             | -28.13           | 2        | 6           | 0      | 429.472         | 6              | COc1ccc(c(c1)C(=O)C2=C(C(=O)N(C@H)2c3ccc(cc3)C)c4ccc(cc4)O                        |
| ZINC00702434 | 3.15  | -1.58             | -24.9            | 1        | 6           | 0      | 429.472         | 7              | COc1ccc(c(c1)C(=O)C2=C(C(=O)N(C@H)2[C@@H](N(C(=O)C2=O)CCc3cccc3)c4ccc(cc4)O       |
| ZINC00659333 | 5.8   | 1.98              | -12.81           | 0        | 6           | 0      | 521.877         | 4              | c1ccc(cc1)c2cc(n3c2)c(cn3)C(=O)N4CCN(CC4)c5ccc(cc5)C)C(F)F                        |
| ZINC00848555 | 9.57  | 9.57              | -12.23           | 1        | 6           | 0      | 452.864         | 5              | COc1ccc(cc1)c2cc(n3c2)c(cn3)C(=O)Nc4CCCC4)C(C)C(F)F                               |
| ZINC00702428 | 2.39  | 7.48              | -44.42           | 1        | 7           | -1     | 429.452         | 7              | CCOc1ccc(c(c1)C(=O)C2=C(C(=O)N(C@H)2c3ccc(cc3)O)C)c4ccc(cc4)O-                    |
| ZINC00702428 | 2.84  | -2.93             | -28.35           | 2        | 7           | 0      | 430.46          | 6              | CCOc1ccc(c(c1)C(=O)C2=C(C(=O)N(C@H)2c3ccc(cc3)C)c4ccc(cc4)O                       |
| ZINC00702428 | 1.81  | -2.68             | -28.22           | 1        | 7           | 0      | 430.46          | 7              | CCOc1ccc(c(c1)C(=O)C2=C(C(=O)N(C@H)2[C@@H](N(C(=O)C2=O)CCc3cccc3)c4ccc(cc4)O      |
| ZINC08440202 | 6.39  | -1.16             | -17.4            | 1        | 6           | 0      | 536.031         | 5              | CC1=NC2=C([C@@H](C1)C(=O)Nc3cccc3)c4ccc(o4)c5cccc(c5)C)C(=O)Nc6cccc6              |
| ZINC08440202 | 6.57  | -1.07             | -16.14           | 1        | 6           | 0      | 536.031         | 5              | C=C1C([C@@H](C2=C(N1)C[C@H](CC2=O)c3cccc3)c4ccc(o4)c5cccc(c5)C)C(=O)Nc6cccc6      |
| ZINC08440202 | 6.57  | -0.12             | -16.65           | 1        | 6           | 0      | 536.031         | 5              | C=C1C([C@@H](C2=C(N1)C[C@H](CC2=O)c3cccc3)c4ccc(o4)c5cccc(c5)C)C(=O)Nc6cccc6      |
| ZINC00659331 | 5.57  | 2.32              | -12.7            | 1        | 8           | 0      | 538.935         | 7              | COOC(=O)c1c2c(sc1NC(=O)c3c4cnc(c4n3)C(F)F)c5ccc5)C)CCCG2                          |
| ZINC08440201 | 5.45  | 3.79              | -9.53            | 1        | 7           | 0      | 490.747         | 6              | c1ccc(oc1)c2cc(n3c2)c(cn3)C(=O)Nc4ccc(cc4)OC(F)F)C(C)C(F)F                        |
| ZINC08440200 | 2.39  | 6.29              | -62.8            | 1        | 7           | -1     | 429.452         | 7              | CCOc1ccc(c(c1)C(=O)C2=C(C(=O)N(C@H)2c3ccc(cc3)O)C)c4ccc(cc4)O-                    |
| ZINC08440200 | 2.84  | -2.53             | -28.77           | 2        | 7           | 0      | 430.46          | 6              | CCOc1ccc(c(c1)C(=O)C2=C(C(=O)N(C@H)2[C@@H](N(C(=O)C2=O)CCc3cccc3)c4ccc(cc4)O      |
| ZINC08440200 | 1.81  | -2.26             | -25.17           | 1        | 7           | 0      | 430.46          | 7              | CCOc1ccc(c(c1)C(=O)C2=C(C(=O)N(C@H)2[C@@H](N(C(=O)C2=O)CCc3cccc3)c4ccc(cc4)O      |
| ZINC00659329 | 4.25  | 2.15              | -15.78           | 1        | 6           | 0      | 449.882         | 7              | COOC(=O)c1c2c(sc1NC(=O)Cn3c(c(cn3)C(F)F)C)CCCG2                                   |
| ZINC00702426 | 2.93  | 9.67              | -43.57           | 0        | 7           | -1     | 443.479         | 8              | CCOc1ccc(c(c1)C(=O)C2=C(C(=O)N(C@H)2c3ccc(cc3)O)C)c4ccc(cc4)O-                    |
| ZINC00702426 | 3.38  | -0.94             | -26.49           | 1        | 7           | 0      | 444.487         | 7              | CCOc1ccc(c(c1)C(=O)C2=C(C(=O)N(C@H)2c3ccc(cc3)C)c4ccc(cc4)O                       |
| ZINC00702426 | 2.35  | -0.69             | -25.5            | 0        | 7           | 0      | 444.487         | 8              | CCOc1ccc(c(c1)C(=O)C2=C(C(=O)N(C@H)2[C@@H](N(C(=O)C2=O)CCc3cccc3)c4ccc(cc4)O      |
| ZINC08440199 | 6.27  | 1.72              | -9.01            | 1        | 5           | 0      | 479.289         | 5              | C(C@H)(c1ccc(c1)N(C(=O)C2=C(C(=O)N(C@H)2c3ccc(cc3)O)C)c4ccc(cc4)C)C               |
| ZINC08440198 | 6.27  | 1.74              | -11.96           | 1        | 5           | 0      | 479.289         | 5              | C(C@H)(c1ccc(c1)N(C(=O)C2=C(C(=O)N(C@H)2c3ccc(cc3)O)C)c4ccc(cc4)C)C               |
| ZINC00702427 | 2.93  | 9.69              | -46.4            | 0        | 7           | -1     | 443.479         | 8              | CCOc1ccc(c(c1)C(=O)C2=C(C(=O)N(C@H)2c3ccc(cc3)O)C)c4ccc(cc4)O-                    |
| ZINC00702427 | 3.38  | -0.94             | -27.06           | 1        | 7           | 0      | 444.487         | 7              | CCOc1ccc(c(c1)C(=O)C2=C(C(=O)N(C@H)2[C@@H](N(C(=O)C2=O)CCc3cccc3)c4ccc(cc4)O      |
| ZINC00702427 | 2.35  | -0.64             | -24.92           | 0        | 7           | 0      | 444.487         | 8              | CCOc1ccc(c(c1)C(=O)C2=C(C(=O)N(C@H)2[C@@H](N(C(=O)C2=O)CCc3cccc3)c4ccc(cc4)O      |
| ZINC17160093 | 2.26  | 9.95              | -64.28           | 0        | 7           | -1     | 422.486         | 8              | COc1ccc(c(c1)C(=O)C2=C(C(=O)N(C@H)2c3ccc(s)CCn4c4nc4)O-                           |
| ZINC17160093 | 1.68  | 10.16             | -18.42           | 0        | 7           | 0      | 423.494         | 8              | COc1ccc(c(c1)C(=O)C2=C(C(=O)N(C@H)2[C@@H](N(C(=O)C2=O)CCn3ccc3)c4ccc4             |
| ZINC17160093 | 2.71  | 10.8              | -41.24           | 2        | 7           | 1      | 424.502         | 7              | COc1ccc(c(c1)C(=O)C2=C(C(=O)N(C@H)2[C@@H](N(C(=O)C2=O)CCn3ccc3)c4ccc4)O           |
| ZINC17160093 | 1.68  | 10.67             | -44.5            | 1        | 7           | 1      | 424.502         | 8              | COc1ccc(c(c1)C(=O)C2=C(C(=O)N(C@H)2[C@@H](N(C(=O)C2=O)CCn3ccc3)c4ccc4             |
| ZINC17160093 | 2.26  | 10.43             | -77.85           | 1        | 7           | 0      | 423.494         | 8              | COc1ccc(c(c1)C(=O)C2=C(C(=O)N(C@H)2c3ccc(s)CCn4c4nc4)O-                           |
| ZINC17160090 | 2.26  | 9.72              | -65.96           | 0        | 7           | -1     | 422.486         | 8              | COc1ccc(c(c1)C(=O)C2=C(C(=O)N(C@H)2c3ccc(s)CCn4c4nc4)O-                           |
| ZINC17160090 | 2.71  | 10.18             | -43.3            | 2        | 7           | 1      | 424.502         | 7              | COc1ccc(c(c1)C(=O)C2=C(C(=O)N(C@H)2[C@@H](N(C(=O)C2=O)CCn3ccc3)c4ccc4)O           |
| ZINC17160090 | 2.26  | 10.12             | -77.54           | 1        | 7           | 0      | 423.494         | 8              | COc1ccc(c(c1)C(=O)C2=C(C(=O)N(C@H)2c3ccc(s)CCn4c4nc4)O-                           |
| ZINC08440196 | 8.08  | 1.1               | -14.35           | 1        | 5           | 0      | 568.913         | 8              | CCOc1ccc(cc1)c2ccc(c(c2)SC(C(=O)Nc3c(ccc3)C)C)C)C#N4cccc4                         |
| ZINC08440195 | 6.43  | 16.29             | -18.93           | 2        | 6           | 0      | 536.031         | 5              | C=C1C([C@@H](C2=C(N1)C[C@H](CC2=O)c3cccc3)c4ccc(o4)c5cccc(c5)C)C(=O)Nc6cccc6      |
| ZINC08440195 | 6.57  | -1.67             | -12.62           | 1        | 6           | 0      | 536.031         | 5              | C=C1C([C@@H](C2=C(N1)C[C@H](CC2=O)c3cccc3)c4ccc(o4)c5cccc(c5)C)C(=O)Nc6cccc6      |
| ZINC08440195 | 6.57  | -0.3              | -13.6            | 1        | 6           | 0      | 536.031         | 5              | C=C1C([C@@H](C2=C(N1)C[C@H](CC2=O)c3cccc3)c4ccc(o4)c5cccc(c5)C)C(=O)Nc6cccc6      |

Supplementary Table S2:

Detailed table of XP Docking using Schrodinger's Glide module

| ZINC_ID      | xLogP | ApolarDesolvation | PolarDesolvation | H Donors | H Acceptors | Charge | MolecularWeight | RotatableBonds | SMILES                                                                                          |
|--------------|-------|-------------------|------------------|----------|-------------|--------|-----------------|----------------|-------------------------------------------------------------------------------------------------|
| ZINC08440194 | 6.5   | 0.99              | -15.57           | 1        | 5           | 0      | 485.996         | 7              | COc1ccc(cc1)e2cc(n(c2C#N)SCC(=O)Nc3ccc(cc3)Cl)c4cccc4                                           |
| ZINC05918873 | 3.46  | 8.67              | -59.14           | 1        | 7           | -1     | 457.506         | 9              | CCCCOc1ccc(c1)C(=O)C2=C(C(=O)N)[C@@H]2c3ccc(c3)O[Cc4cncnc4][O-]                                 |
| ZINC05918873 | 3.9   | -2.73             | -28.08           | 2        | 7           | 0      | 458.514         | 8              | CCCCOc1ccc(c1)C(=O)C2=C(C(=O)N)[C@@H]2c3ccc(c3)C4=CCc(c4)O                                      |
| ZINC05918873 | 2.87  | -2.48             | -28              | 1        | 7           | 0      | 458.514         | 9              | CCCCOc1ccc(c1)C(=O)[C@@H]2[C@@H](N(C(=O)C2=O)Cc3cnc3)C4=CCc(c4)O                                |
| ZINC06442301 | 5.83  | 13.28             | -17.58           | 1        | 6           | 0      | 495.604         | 8              | Cc1ccc(c1)NC(=O)CSc2c(c(c2)C3=CC=CC3)c4ccc(c4)OC(=O)C#N                                         |
| ZINC05918870 | 3.46  | 7.87              | -62.39           | 1        | 7           | -1     | 457.506         | 9              | CCCCOc1ccc(c1)C(=O)C2=C(C(=O)N)[C@@H]2c3ccc(c3)O[Cc4cncnc4][O-]                                 |
| ZINC05918870 | 3.9   | -2.34             | -28.49           | 2        | 7           | 0      | 458.514         | 8              | CCCCOc1ccc(c1)C(=O)C2=C(C(=O)N)[C@@H]2c3ccc(c3)C4=CCc(c4)O                                      |
| ZINC05918870 | 2.87  | -2.07             | -24.96           | 1        | 7           | 0      | 458.514         | 9              | CCCCOc1ccc(c1)C(=O)[C@@H]2[C@@H](N(C(=O)C2=O)Cc3cnc3)C4=CCc(c4)O                                |
| ZINC08440193 | 6.84  | 1.45              | -12.8            | 1        | 4           | 0      | 469.997         | 6              | Cc1ccc(cc1)e2cc(nc2C#N)SCC(=O)Nc3ccc3C1c4cccc4                                                  |
| ZINC08440192 | 7.02  | 0.67              | -14.76           | 1        | 4           | 0      | 514.448         | 6              | Cc1ccc(cc1)e2cc(nc2C#N)SCC(=O)Nc3ccc(cc3)Br)c4cccc4                                             |
| ZINC08440191 | 6.08  | 1.31              | -17.53           | 1        | 6           | 0      | 516.022         | 8              | COc1ccc(cc1OC)c2cc(nc2C#N)SCC(=O)Nc3ccc(cc3)Cl)c4cccc4                                          |
| ZINC0848231  | 5.31  | 0.66              | -10.38           | 0        | 6           | 0      | 436.464         | 9              | c1ccc(cc1)COc2ccc(cc2)OC(=O)CSc3nnc(c3)c4ccc(cc4)F                                              |
| ZINC08738116 | 3.43  | 9.97              | -16.25           | 1        | 8           | 0      | 478.621         | 7              | CCOC(=O)c1c(nc(s1)Nc(=O)CSc2nc3c(c4c(s3)CCCC4)c(=O)n2)CC                                        |
| ZINC08440190 | 6.43  | 15.34             | -21.09           | 2        | 6           | 0      | 536.031         | 5              | CC1=C([C@@H]([C@H]2C=C(N1)C[C@@H](CC2=O)c3ccc3)C4=CCc(c4)C5=CCc(c5)C)C(=O)Nc6cccn6              |
| ZINC08440190 | 6.57  | -0.88             | -15.41           | 1        | 6           | 0      | 536.031         | 5              | C=C1C([C@@H]([C@@H]2C=C(N1)C[C@@H](CC2=O)c3ccc3)C4=CCc(c4)C5=CCc(c5)C)C(=O)Nc6cccn6             |
| ZINC08440190 | 6.39  | -1.8              | -15.48           | 1        | 6           | 0      | 536.031         | 5              | CC1=C([C@@H]([C@@H]2C=C(N1)C[C@@H](CC2=O)c3ccc3)C4=CCc(c4)C5=CCc(c5)C)C(=O)Nc6cccn6             |
| ZINC08440190 | 6.57  | -2.12             | -13.55           | 1        | 6           | 0      | 536.031         | 5              | C=C1C([C@@H]([C@@H]2C=C(N1)C[C@@H](CC2=O)c3ccc3)C4=CCc(c4)C5=CCc(c5)C)C(=O)Nc6cccn6             |
| ZINC00970487 | 5.28  | -2.27             | -12.59           | 0        | 5           | 0      | 428.923         | 3              | c1ccc(cc1)e2c3cc(ccc3nc(n2)N4CCN(CC4)C(=O)c5ccc5)Cl                                             |
| ZINC08440189 | 6.52  | -0.87             | -12.05           | 1        | 5           | 0      | 589.715         | 6              | c1ccc(cc1)[C@@H]2CC(=NN2)C(=O)CC(=O)Nc3ccc(cc3)Cl)c4ccc(cc4)Br                                  |
| ZINC08440188 | 6.52  | -0.88             | -12.05           | 1        | 5           | 0      | 589.715         | 6              | c1ccc(cc1)[C@@H]2CC(=NN2)C(=O)CC(=O)Nc3ccc(cc3)Cl)c4ccc(cc4)Br                                  |
| ZINC13549728 | 3.5   | 10.25             | -15.7            | 1        | 8           | 0      | 478.621         | 9              | CCOC(=O)c1c(nc(s1)Nc(=O)CSc2nc3c(c4c(s3)C)C)C(=O)n2CC=C                                         |
| ZINC06446786 | 6.98  | -1.28             | -12.18           | 2        | 5           | 0      | 602.282         | 5              | c1ccc(cc1)c2c3cc(ccc3)N]C(=O)c2C(=O)Nc4ccc(cc4)C(=O)c5ccc5)Br                                   |
| ZINC01804641 | 6.62  | 0.6               | -12.75           | 0        | 4           | 0      | 468.818         | 5              | Cn1c(nnc1SCC(=O)c2ccc(cc2)Cl)c3c(c4cccc4s3)Cl                                                   |
| ZINC0702416  | 6.02  | 0.72              | -12.15           | 0        | 4           | 0      | 434.373         | 5              | Cn1c(nnc1SCC(=O)c2ccc(cc2)Cl)c3c(c4cccc4s3)Cl                                                   |
| ZINC08440182 | 5.74  | 0.3               | -17.59           | 0        | 6           | 0      | 533.391         | 3              | c1cc(c(c1))C(=O)N=C/2/C/C/C3c2sc4c3(=O)n5c(f4)CCCC5                                             |
| ZINC06445859 | 6.6   | 0.31              | -55.8            | 1        | 6           | -1     | 548.855         | 5              | c1ccc(cc1)[N+](=O)[O-]S[C@@H]2[C@@H]3[C@@H]([C@@H]2)C4=CCc(c4N[C@@H]3c5ccc(cc5)C)C(=O)[O-]      |
| ZINC0702413  | 4.56  | 2.08              | -14.78           | 0        | 7           | 0      | 468.362         | 8              | Cn1c(nnc1SCC(=O)c2ccc(cc2)Cl)c3c(c4cccc4s3)Cl                                                   |
| ZINC06445776 | 6.6   | -0.11             | -75.03           | 1        | 6           | -1     | 548.855         | 5              | c1ccc(cc1)[N+](=O)[O-]S[C@@H]2[C@@H]3[C@@H]([C@@H]2)C4=CCc(c4N[C@@H]3c5ccc(cc5)C)C(=O)[O-]      |
| ZINC06445810 | 6.6   | -0.26             | -53.53           | 1        | 6           | -1     | 548.855         | 5              | c1ccc(cc1)[N+](=O)[O-]S[C@@H]2[C@@H]3[C@@H]([C@@H]2)C4=CCc(c4N[C@@H]3c5ccc(cc5)C)C(=O)[O-]      |
| ZINC06445741 | 6.6   | -0.12             | -59.64           | 1        | 6           | -1     | 548.855         | 5              | c1ccc(cc1)[N+](=O)[O-]S[C@@H]2[C@@H]3[C@@H]([C@@H]2)C4=CCc(c4N[C@@H]3c5ccc(cc5)C)C(=O)[O-]      |
| ZINC0702412  | 5.07  | 2.88              | -15.43           | 0        | 7           | 0      | 475.57          | 9              | Cn1c(nnc1SCC(=O)c2ccc(cc2)Cl)c3c(c4cccc4s3)Cl                                                   |
| ZINC02062063 | 4.34  | 0.29              | -24.7            | 2        | 10          | 0      | 509.54          | 9              | COc1=O)c1c2c(sc1NC(=O)COc3ccc(c3)NC(=O)c4ccc(cc4)N+][O-][O-]CCCC2                               |
| ZINC08440179 | 6.84  | -0.49             | -13.04           | 3        | 7           | 0      | 523.614         | 7              | C=C1C(=O)c1c2cc(c3c(c(fsc3n2)C(=O)Nc4ccc(cc4)Cl)C(=O)OC)Nc5ccc(cc5)OC                           |
| ZINC0702411  | 5.33  | 1.24              | -15.24           | 0        | 6           | 0      | 429.501         | 6              | Cn1c(nnc1SCC(=O)c2ccc(cc2)Cl)c3c(c4cccc4s3)Cl                                                   |
| ZINC08440177 | 7.21  | -0.53             | -12.8            | 3        | 7           | 0      | 537.641         | 8              | CCOC(=O)c1ccc(cc1)Nc(=O)c2c(c3c(ccn3s2)C4=CCc(c4)C)C5=CCc(cc5)OC                                |
| ZINC02617389 | 5.42  | 2.02              | -12.91           | 0        | 5           | 0      | 448.51          | 7              | c1ccc(cc1)e2ccc(cc2)C(=O)CSc3nnc(n3c4ccc4)c5ccc5                                                |
| ZINC02690519 | 3.95  | 2.2               | -14.03           | 0        | 7           | 0      | 433.917         | 8              | Cn1c(nnc1SCC(=O)c2ccc(cc2)Cl)c3c(c4cccc4s3)Cl                                                   |
| ZINC08440172 | 2.69  | -6.85             | -20.11           | 4        | 11          | 0      | 547.593         | 10             | C[C@@H](C(=O)N)NC(=O)CSc1nc2ccc2n1)NC(=O)c3ccc3NC(=O)c4ccc(cc4)OC                               |
| ZINC08440171 | 2.69  | -6.85             | -20.34           | 4        | 11          | 0      | 547.593         | 10             | C[C@@H](C(=O)N)NC(=O)CSc1nc2ccc2n1)NC(=O)c3ccc3NC(=O)c4ccc(cc4)OC                               |
| ZINC08440170 | 4.53  | 2.21              | -11.28           | 0        | 4           | 0      | 424.234         | 6              | COc1ccc(cc1OC)C=C/C(=O)c2ccc(cc2)                                                               |
| ZINC08440169 | 6.07  | 14.81             | -20.53           | 2        | 6           | 0      | 541.449         | 3              | CC1=C([C@@H]([C@H]2C=C(N1)CCCC2=O)c3ccc(c3)C4=CCc(c4)C)C(=O)Nc6cc(cn6)Br                        |
| ZINC01771078 | 6.49  | 15.29             | -11.82           | 0        | 6           | 0      | 446.51          | 5              | Cc1ccc(c1OC)c2nc3c4c(c4oc4n3n2)c5ccc5)c6ccc6)C                                                  |
| ZINC08440168 | 5.91  | -0.68             | -43.56           | 2        | 5           | 1      | 433.388         | 1              | CC1(Cc2c3c4nc(n4)nc3sc2C([NH2+][1])(C)C)c5ccc(cc5)C)C                                           |
| ZINC08440167 | 4.54  | 2.44              | -12.12           | 0        | 4           | 0      | 424.234         | 6              | COc1ccc(cc1OC)C=C/C(=O)c2ccc(cc2)                                                               |
| ZINC08440166 | 4.86  | -0.45             | -11.01           | 0        | 6           | 0      | 456.369         | 4              | C/C(=N)OC1nc2c3c4c(sc3n2n1)CCCC4/c5ccc(cc5)Br                                                   |
| ZINC02290294 | 5.64  | 1.36              | -14.37           | 0        | 7           | 0      | 462.509         | 6              | COc1ccc(cc1OC)C2nc3c4c(c4oc4n3n2)c5ccc5)c6ccc6                                                  |
| ZINC08440165 | 4.85  | 1.29              | -10.57           | 1        | 7           | 0      | 423.494         | 6              | CCOC(=O)C1=C(N=C2n(cf=O)/c=C3ccc(nH3)/s2)[C@@H]1c4ccc(cc4)OC                                    |
| ZINC08440164 | 5.68  | 0.36              | -44.02           | 2        | 6           | 1      | 450.632         | 4              | Cc1ccc(cc1)OC2nc3c4c5c(sc4n3n2)C([NH2+][1])(C)C)C)C)C)C)C                                       |
| ZINC02277437 | 6.79  | -1.73             | -14.72           | 0        | 6           | 0      | 491.601         | 5              | c1ccc(cc1)e2c3c4nc(n4)nc3oc2c5ccc5)C5c6nc7ccc7s6                                                |
| ZINC08440163 | 6.07  | 14.8              | -20.42           | 2        | 6           | 0      | 541.449         | 3              | CC1=C([C@@H]([C@H]2C=C(N1)CCCC2=O)c3ccc(c3)C4=CCc(c4)C)C(=O)Nc6cc(cn6)Br                        |
| ZINC01902382 | 6.81  | 0.45              | -11.75           | 0        | 5           | 0      | 467.326         | 3              | c1ccc(cc1)e2c3c4nc(n4)nc3oc2c5ccc5)c6ccc6)Br                                                    |
| ZINC02062059 | 6.1   | 1.01              | -11.46           | 0        | 6           | 0      | 418.456         | 4              | COc1ccc(cc1)e2nc3c4c(c4oc4n3n2)c5ccc5)c6ccc6                                                    |
| ZINC06073489 | 5.24  | 0.51              | -15.41           | 2        | 6           | 0      | 480.659         | 10             | C1Cc2c(sc2C#N)NC(=O)CCCCC(=O)Nc3c(c4c(s3)CCCC4)C#N)C1                                           |
| ZINC08440159 | 8.15  | 3.8               | -52.33           | 0        | 4           | -1     | 561.567         | 3              | c1ccc(cc1)C#Cc2ccc(cc2)F)c3c(nc4cc(c4n3)C(=O)[O-])c5ccc(cc5)C#Cc6ccc(cc6)F                      |
| ZINC08440158 | 5.59  | -0.85             | -15.97           | 0        | 7           | 0      | 472.469         | 5              | C[C@@H]12[C@@H]([C@@H]([C@H]3c3ccc3n1)nc4c(=O)/c=C5ccc(cc5)OC(F)F)/sc4=N2)C(=O)OC               |
| ZINC08440157 | 5.71  | 13.96             | -22.46           | 2        | 7           | 0      | 551.565         | 7              | CC1=C([C@@H]([C@H]2C=C(N1)CCCC2=O)C)C3ccc(cc3)COc4ccc(cc4)C(F)F)C(=O)Nc5ccc5                    |
| ZINC08440156 | 5.85  | 2.5               | -17.41           | 1        | 7           | 0      | 551.565         | 7              | CC1(Cc2=NC(=C)C([C@@H]([C@H]2C=C(N1)CCCC2=O)C)C3ccc(cc3)COc4ccc(cc4)C(F)F)C(=O)Nc5ccc5)C        |
| ZINC08440157 | 5.85  | 1.49              | -19.07           | 1        | 7           | 0      | 551.565         | 7              | CC1(Cc2=NC(=C)C([C@@H]([C@H]2C=C(N1)CCCC2=O)C)C3ccc(cc3)COc4ccc(cc4)C(F)F)C(=O)Nc5ccc5)C        |
| ZINC08440156 | 5.59  | -0.23             | -16.01           | 0        | 7           | 0      | 472.469         | 5              | C[C@@H]12[C@@H]([C@@H]([C@H]3c3ccc3n1)nc4c(=O)/c=C5ccc(cc5)OC(F)F)/sc4=N2)C(=O)OC               |
| ZINC08440155 | 6.34  | 0.18              | -5.62            | 2        | 2           | 0      | 446.553         | 2              | C[C@@H]12CC[C@@H]([C@H]1)CC1=C(C)C[C@@H]3[C@@H]2[C@@H]4([C@@H]3C/C=C/c5ccc(cc5)C(F)F)/[C@@H]4)O |
| ZINC08440154 | 5.99  | 1.65              | -14.26           | 1        | 6           | 0      | 467.308         | 4              | Cc1c(cfn1)c2c(ccc2Cl)C(=O)Nc3cc4c5ccc5oc4c3OC                                                   |

Supplementary Table S2:

Detailed table of XP Docking using Schrodinger's Glide module

| ZINC_ID      | xLogP | ApolarDesolvation | PolarDesolvation | H Donors | H Acceptors | Charge | MolecularWeight | RotatableBonds | SMILES                                                                                                        |
|--------------|-------|-------------------|------------------|----------|-------------|--------|-----------------|----------------|---------------------------------------------------------------------------------------------------------------|
| ZINC08440153 | 6.34  | 0.37              | -5.64            | 2        | 2           | 0      | 446.553         | 2              | C[C@@]12CC[C@H]([C@]1=CC[C@@H]3[C@@H]2CC[C@@]4([C@@H]3C/C=C\C5CCCCC5)C(F)F)/C@@H4O)C)O                        |
| ZINC08440152 | 5.36  | 1.88              | -13.23           | 1        | 6           | 0      | 432.863         | 4              | Cc1c(c1no1)c2cccc2C1[C@]0Nc3cc4c5cccc5oc4cc3OC                                                                |
| ZINC08440151 | 6.76  | -0.91             | -11.88           | 3        | 7           | 0      | 523.614         | 8              | CCOC(=O)c1ccc(cc1)NC(=O)c2c(c3c(cc1nc3s2)c4cccc4)c5ccc(cc5)O)N                                                |
| ZINC08440150 | 6.34  | 0.02              | -5.99            | 2        | 2           | 0      | 446.553         | 2              | C[C@@]12CC[C@H]([C@]1=CC[C@@H]3[C@@H]2CC[C@@]4([C@@H]3C/C=C\C5CCCCC5)C(F)F)/C@@H4O)C)O                        |
| ZINC08440149 | 5.67  | 1.17              | -15.65           | 1        | 7           | 0      | 551.565         | 7              | CC1=NC2=C([C@@H]([C1C(=O)Nc3ccccn3)c4ccc(o4)C0c5cccc(c5)C(F)F)C(=O)CC2)C                                      |
| ZINC08440149 | 5.85  | 2.41              | -22.13           | 1        | 7           | 0      | 551.565         | 7              | CC1(CC2=NC(=C)C([C@@H]([C2C(=O)C1)c3ccc(o3)C0c4cccc(c4)C(F)F)C(=O)Nc5ccccn5)C                                 |
| ZINC08440149 | 5.85  | 0.92              | -17.13           | 1        | 7           | 0      | 551.565         | 7              | CC1(CC2=NC(=C)C([C@@H]([C2C(=O)C1)c3ccc(o3)C0c4cccc(c4)C(F)F)C(=O)Nc5ccccn5)C                                 |
| ZINC08440148 | 7.5   | -2.3              | -8.62            | 3        | 5           | 0      | 520.441         | 5              | C0c1ccc(cc1)c2cc(nc3c2c(c3)C(=O)Nc4ccc(cc4)C)C1)Nc5cccc5                                                      |
| ZINC0845371  | 6.26  | 1.46              | -15.6            | 1        | 5           | 0      | 465.578         | 7              | Cc1ccc(cc1)e2ccc(c(c2)S)C(=O)Nc3cccc3)C#N)c4ccc(cc4)OC                                                        |
| ZINC08440147 | 6.44  | 2.58              | -18.17           | 1        | 7           | 0      | 523.614         | 9              | Cc1ccc(cc1)e2ccc(c(c2)S)C(=O)Nc3cccc3)C(=O)OC)C#N)c4ccc(cc4)OC                                                |
| ZINC08440146 | 6.34  | 0.04              | -6.29            | 2        | 2           | 0      | 446.553         | 2              | C[C@@]12CC[C@H]([C@]1=CC[C@@H]3[C@@H]2CC[C@@]4([C@@H]3C/C=C\C5CCCCC5)C(F)F)/C@@H4O)C)O                        |
| ZINC08440145 | 7.71  | -3.28             | -7.32            | 3        | 4           | 0      | 579.317         | 4              | c1ccc(cc1)c2cc(nc3c2c(c3)C(=O)Nc4ccc(cc4)Br)Br)c5cccc5                                                        |
| ZINC02062041 | 8.22  | 1.45              | -16.85           | 0        | 3           | 0      | 449.509         | 3              | c1ccc(cc1)Oc2ccc(c2)c3c4c(c5c6cccc6ccc5n3)-c7cccc7C4=O                                                        |
| ZINC08440144 | 6.34  | -0.33             | -17.85           | 1        | 9           | 0      | 622.699         | 11             | CCOc1ccc2c(c1)sc(n2)N3[C@@H]([C@]1=CC(=O)O)C(=O)c4ccc(cc4)OC)c5ccc(cc5)OC)OC6cccc6                            |
| ZINC08440144 | 5.75  | -0.44             | -22.26           | 0        | 9           | 0      | 622.699         | 11             | CCOc1ccc2c(c1)sc(n2)N3[C@@H]([C@]1=CC(=O)O)C(=O)c4ccc(cc4)OC)c5ccc(cc5)OC)OC6cccc6                            |
| ZINC08440143 | 3.86  | -0.19             | -62.28           | 0        | 6           | -1     | 496.008         | 4              | Cc1cc2c3c(c1)[C@@H]4[C@@H]([C@@H]([C@@H]4)C)Sc5cccc5[N+](=O)[O-])[C@@H]N3C[C@@H]6[C@@H]2C=CC6)C(=O)[O-]       |
| ZINC08440142 | 6.34  | -0.41             | -17.78           | 1        | 9           | 0      | 622.699         | 11             | CCOc1ccc2c(c1)sc(n2)N3[C@@H]([C@]1=CC(=O)O)C(=O)c4ccc(cc4)OC)c5ccc(cc5)OC)OC6cccc6                            |
| ZINC08440142 | 5.75  | -0.49             | -22.07           | 0        | 9           | 0      | 622.699         | 11             | CCOc1ccc2c(c1)sc(n2)N3[C@@H]([C@]1=CC(=O)O)C(=O)c4ccc(cc4)OC)c5ccc(cc5)OC)OC6cccc6                            |
| ZINC06194705 | 3.86  | 0.18              | -57.67           | 0        | 6           | -1     | 496.008         | 4              | Cc1cc2c3c(c1)[C@@H]4[C@@H]([C@@H]([C@@H]4)C)Sc5cccc5[N+](=O)[O-])[C@@H]N3C[C@@H]6[C@@H]2C=CC6)C(=O)[O-]       |
| ZINC05928972 | 6.42  | 14.37             | -59.57           | 0        | 5           | -1     | 467.57          | 5              | CC1ccc(cc1)[C@@H]2C(=C(C(=O)N2)3nc4ccc(cc4s3)C)C)C(=O)c5ccc(cc5)C                                             |
| ZINC05928972 | 6.87  | 13.29             | -25.92           | 1        | 5           | 0      | 468.578         | 4              | Cc1ccc(cc1)[C@@H]2C(=C(C3ccc(cc3)O)C)C(=O)N2nc4c5ccc(cc5s4)C                                                  |
| ZINC05928972 | 5.84  | 14.29             | -15.32           | 0        | 5           | 0      | 468.578         | 5              | CC1ccc(cc1)[C@@H]2[C@@H]([C@]1=O)N2c3nc4ccc(cc4s3)C)C(=O)c5ccc(cc5)C                                          |
| ZINC05928795 | 6.42  | 14.37             | -59.44           | 0        | 5           | -1     | 467.57          | 5              | CC1ccc(cc1)[C@@H]2C(=C(C(=O)N2)3nc4ccc(cc4s3)C)C)C(=O)c5ccc(cc5)C                                             |
| ZINC08440141 | 3.86  | -0.01             | -56.41           | 0        | 6           | -1     | 496.008         | 4              | Cc1cc2c3c(c1)[C@@H]4[C@@H]([C@@H]([C@@H]4)C)Sc5cccc5[N+](=O)[O-])[C@@H]N3C[C@@H]6[C@@H]2C=CC6)C(=O)[O-]       |
| ZINC08440140 | 4.53  | 11.22             | -16.26           | 2        | 5           | 0      | 472.408         | 3              | CC1=C([C@@H]([C2=C(N1)CC(C2=O)C)C3ccc(s3)Br)C(=O)N4ccccn4                                                     |
| ZINC08440140 | 4.67  | 9.6               | -13.52           | 1        | 5           | 0      | 472.408         | 3              | CC1(CC2=NC(=C)C([C@@H]([C2C(=O)C1)c3ccc(s3)Br)C(=O)N4ccccn4)C                                                 |
| ZINC08440140 | 4.67  | 10.49             | -16.35           | 1        | 5           | 0      | 472.408         | 3              | CC1(CC2=NC(=C)C([C@@H]([C2C(=O)C1)c3ccc(s3)Br)C(=O)N4ccccn4)C                                                 |
| ZINC06194703 | 3.86  | -0.03             | -53.23           | 0        | 6           | -1     | 496.008         | 4              | Cc1cc2c3c(c1)[C@@H]4[C@@H]([C@@H]([C@@H]4)C)Sc5cccc5[N+](=O)[O-])[C@@H]N3C[C@@H]6[C@@H]2C=CC6)C(=O)[O-]       |
| ZINC08440139 | 3.33  | 8.98              | -17.3            | 2        | 6           | 0      | 458.643         | 8              | C[C@@]12CC[C@]([C1(C)C])[C@@H]3[C@@H]([C@@H]([C@@H]3)C)Sc4cccc4[N+](=O)[O-])[C@@H]34CC[C@@]([C3(C)C)C(=O)C4)C |
| ZINC06194074 | 6.4   | 0.38              | -18.79           | 1        | 7           | 0      | 574.884         | 5              | Cc1cc(cc2c1N[C@@H]([C@@H]3[C@@H]2[C@@H]([C@@H]([C3]Sc4cccc4[N+](=O)[O-])C)c5ccc(cc5)Br)N+](=O)[O-]            |
| ZINC06194059 | 6.4   | 0.74              | -15.11           | 1        | 7           | 0      | 574.884         | 5              | Cc1cc(cc2c1N[C@@H]([C@@H]3[C@@H]2[C@@H]([C@@H]([C3]Sc4cccc4[N+](=O)[O-])C)c5ccc(cc5)Br)N+](=O)[O-]            |
| ZINC06194066 | 6.4   | 0.38              | -21.61           | 1        | 7           | 0      | 574.884         | 5              | Cc1cc(cc2c1N[C@@H]([C@@H]3[C@@H]2[C@@H]([C@@H]([C3]Sc4cccc4[N+](=O)[O-])C)c5ccc(cc5)Br)N+](=O)[O-]            |
| ZINC08440138 | 3.33  | 8.98              | -17.37           | 2        | 6           | 0      | 458.643         | 8              | C[C@@]12CC[C@]([C1(C)C])[C@@H]3[C@@H]([C@@H]([C@@H]3)C)Sc4cccc4[N+](=O)[O-])[C@@H]34CC[C@@]([C3(C)C)C(=O)C4)C |
| ZINC06194053 | 6.4   | 0.51              | -16.87           | 1        | 7           | 0      | 574.884         | 5              | Cc1cc(cc2c1N[C@@H]([C@@H]3[C@@H]2[C@@H]([C@@H]([C3]Sc4cccc4[N+](=O)[O-])C)c5ccc(cc5)Br)N+](=O)[O-]            |
| ZINC08440137 | 4.48  | 10.7              | -17.95           | 1        | 5           | 0      | 472.408         | 3              | CC1=C([C@@H]([C2=C(N1)CC(C2=O)C)C3ccc(s3)Br)C(=O)N4ccccn4                                                     |
| ZINC08440136 | 5.15  | 12.38             | -15.74           | 2        | 8           | 0      | 600.756         | 7              | C[C@@]12CC[C@]([C1(C)C])[C@@H]3[C@@H]([C@@H]([C@@H]3)C)Sc4cccc4[N+](=O)[O-])C)c5ccc(cc5)Br)N+](=O)[O-]        |
| ZINC0842712  | 3.33  | 0.27              | -29.71           | 3        | 8           | 0      | 459.502         | 6              | Cc1ccc(cc1)NC(=O)C0c2ccc(cc2OC)C@H3C(=C(OC4=C3C(=O)CCC4)N)C#N                                                 |
| ZINC0842713  | 3.33  | 0.27              | -29.84           | 3        | 8           | 0      | 459.502         | 6              | Cc1ccc(cc1)NC(=O)C0c2ccc(cc2OC)C@H3C(=C(OC4=C3C(=O)CCC4)N)C#N                                                 |
| ZINC08440135 | 5.15  | 12.39             | -15.61           | 2        | 8           | 0      | 600.756         | 7              | C[C@@]12CC[C@]([C1(C)C])[C@@H]3[C@@H]([C@@H]([C@@H]3)C)Sc4cccc4[N+](=O)[O-])C)c5ccc(cc5)Br)N+](=O)[O-]        |
| ZINC08440134 | 4.66  | 1.1               | -11.83           | 0        | 6           | 0      | 438.318         | 8              | CCOC(=O)C1[C@@H]([C@]1=CC(=O)O)C(=O)OC)c2ccc(cc2)Br)OC                                                        |
| ZINC08440134 | 4.66  | 0.77              | -10.72           | 0        | 6           | 0      | 438.318         | 8              | CCOC(=O)C1[C@@H]([C@]1=CC(=O)O)C(=O)OC)c2ccc(cc2)Br)OC                                                        |
| ZINC08440134 | 4.84  | -0.27             | -9.3             | 0        | 6           | 0      | 438.318         | 8              | CCOC(=O)C1[C@@H]([C@]1=CC(=O)O)C(=O)OC)c2ccc(cc2)Br)OC                                                        |
| ZINC0702388  | 4.59  | 11.1              | -10.37           | 0        | 4           | 0      | 481.184         | 3              | C[C@@]12CC[C@]([C1(C)C])[C@@H]3[C@@H]([C@@H]([C@@H]3)C)Sc4cccc4[N+](=O)[O-])C)c5ccc(cc5)Br)N+](=O)[O-]        |
| ZINC02062020 | 1.73  | -7.19             | -21.23           | 6        | 8           | 0      | 450.586         | 9              | Cc1c(sc1c1C(=O)N)NC(=O)CCCG(=O)Nc2c(c(c2)C)C(=O)N)C                                                           |
| ZINC08440133 | 2.61  | 11.68             | -18.18           | 2        | 10          | 0      | 604.7           | 7              | C[C@@]12CC[C@]([C1(C)C])[C@@H]3[C@@H]([C@@H]([C@@H]3)C)Sc4cccc4[N+](=O)[O-])C)c5ccc(cc5)Br)N+](=O)[O-]        |
| ZINC00298314 | 3.31  | 8.36              | -58.54           | 1        | 4           | -1     | 313.16          | 3              | c1ccc(cc1)NC(=O)C@H2CC(=O)C[C@@H]2C(=O)[O-]C1                                                                 |
| ZINC00854709 | 4.94  | 2.34              | -13.54           | 1        | 6           | 0      | 419.264         | 6              | CCOC(=O)c1ccc(cc1)NC(=O)c2c(oc2c3c(ccc3)C)C1                                                                  |
| ZINC08440132 | 5.11  | 13.12             | -19.69           | 2        | 6           | 0      | 465.553         | 5              | CC1=C([C@@H]([C2=C(N1)C]C)C)C(=O)c3cccc3)c4ccc(cc4)OC)C(=O)Nc5cccc5                                           |
| ZINC08440132 | 5.25  | 12.26             | -17.44           | 1        | 6           | 0      | 465.553         | 5              | C0c1cccc(c1)[C@@H]2[C@@H]3C(=NC(=O)C2C(=O)Nc4ccccn4)C[C@@H]([C3=O)c5cccc5                                     |
| ZINC08440132 | 5.25  | 11.34             | -14.13           | 1        | 6           | 0      | 465.553         | 5              | C0c1cccc(c1)[C@@H]2C3C(=NC(=O)C2C(=O)Nc4ccccn4)C[C@@H]([C3=O)c5cccc5                                          |
| ZINC08440132 | 5.25  | 12.23             | -12.56           | 1        | 6           | 0      | 465.553         | 5              | C0c1cccc(c1)[C@@H]2[C@@H]3C(=NC(=O)C2C(=O)Nc4ccccn4)C[C@@H]([C3=O)c5cccc5                                     |
| ZINC08440131 | 2.61  | 11.69             | -17.85           | 2        | 10          | 0      | 604.7           | 7              | C[C@@]12CC[C@]([C1(C)C])[C@@H]3[C@@H]([C@@H]([C@@H]3)C)Sc4cccc4[N+](=O)[O-])C)c5ccc(cc5)Br)N+](=O)[O-]        |
| ZINC00142373 | 3.14  | 6.62              | -10.54           | 0        | 3           | 0      | 257.314         | 2              | c1ccc(cc1)S(=O)j2ccc3c2ccc3                                                                                   |
| ZINC02062009 | 6.86  | 0.95              | -10.14           | 0        | 4           | 0      | 424.496         | 6              | c1ccc(cc1)e2ccc(cc2)O[C@@H]3[C@@H]([C@@H]([C@@H]3)C)Sc4cccc4[N+](=O)[O-])C)c5ccc(cc5)Br)N+](=O)[O-]           |
| ZINC02062010 | 6.86  | 1.06              | -9.99            | 0        | 4           | 0      | 424.496         | 6              | c1ccc(cc1)e2ccc(cc2)O[C@@H]3[C@@H]([C@@H]([C@@H]3)C)Sc4cccc4[N+](=O)[O-])C)c5ccc(cc5)Br)N+](=O)[O-]           |
| ZINC00828732 | 4.9   | -2.66             | -10.42           | 2        | 4           | 0      | 450.332         | 2              | Cc1ccc(cc1)C[C@@H]2C3=C(CCC3=O)c4c5cccc5cc4N2                                                                 |
| ZINC08440129 | 7.55  | -5.21             | -19.33           | 0        | 7           | 0      | 562.798         | 16             | CCCCN(CCCC)S(=O)(=O)c1ccc2c(c1)C(=O)c3c2ccc(c3)S(=O)(=O)N(CCCC)CCCC                                           |
| ZINC08440128 | 5.11  | 13.12             | -19.46           | 2        | 6           | 0      | 465.553         | 5              | CC1=C([C@@H]([C2=C(N1)C]C)C)C(=O)c3cccc3)c4ccc(cc4)OC)C(=O)Nc5cccc5                                           |
| ZINC08440128 | 5.25  | 11.05             | -19.12           | 1        | 6           | 0      | 465.553         | 5              | C0c1cccc(c1)[C@@H]2C3C(=NC(=O)C2C(=O)Nc4ccccn4)C[C@@H]([C3=O)c5cccc5                                          |
| ZINC08440128 | 5.25  | 11.87             | -33.47           | 1        | 6           | 0      | 465.553         | 5              | C0c1cccc(c1)[C@@H]2[C@@H]3C(=NC(=O)C2C(=O)Nc4ccccn4)C[C@@H]([C3=O)c5cccc5                                     |
| ZINC01306294 | 3.68  | 12.89             | -45.77           | 0        | 5           | -1     | 432.5           | 3              | Cc1ccc(cc1)n2c(cc(c2)C/C=C\3)C(=NC(=S)N)C3=O)c4ccc(cc4)F)O-]C                                                 |



**Supplementary Table S2:  
Detailed table of XP Docking using Schrodinger's Glide module**

| ZINC_ID      | xLogP | ApolarDesolvation | PolarDesolvation | H Donors | H Acceptors | Charge | MolecularWeight | RotatableBonds | SMILES                                                                     |
|--------------|-------|-------------------|------------------|----------|-------------|--------|-----------------|----------------|----------------------------------------------------------------------------|
| ZINC00849729 | 4.6   | 0.95              | -11.73           | 1        | 5           | 0      | 461.301         | 3              | C1cc(ccc1N2C(=O)/C=C/c3ccc(o3)c4ccc(c(c4)Cl)Cl)/C(=O)NC2=SIF               |
| ZINC02061992 | 6.84  | 2.36              | -9.86            | 1        | 5           | 0      | 479.289         | 4              | Cc1ccc(cc1C)NC(=O)c2cc3nc(ccn3n2)C(F)(F)F)c4ccc(c(c4)Cl)Cl                 |
| ZINC08440126 | 6.03  | 14.72             | -59.6            | 0        | 5           | -1     | 468.573         | 10             | CCOCc1ccc(cc1)C(=O)C2=C(C(=O)N)C@H2c3ccc(cc3)C[C@H]4c4ccc(c4)O-            |
| ZINC08440126 | 6.48  | 0.95              | -27.09           | 1        | 5           | 0      | 469.581         | 9              | CCOCc1ccc(cc1)C=C2[C@H](N(C(=O)C2=O)CCc3ccc(c3)c4ccc(cc4)CC)O              |
| ZINC08440126 | 5.45  | 1.17              | -19.22           | 0        | 5           | 0      | 469.581         | 10             | CCOCc1ccc(cc1)C(=O)[C@H]2[C@H](N(C(=O)C2=O)CCc3ccc(c3)c4ccc(cc4)CC         |
| ZINC08440125 | 5.35  | -1.36             | -11.78           | 1        | 7           | 0      | 528.399         | 6              | CC1=NC2=C([C@H](C1C(=O)O)C3cc(c(c(c3)Br)O)C)C(=O)C[C@H](C2)c4ccc(cc4)OC    |
| ZINC08440125 | 5.54  | -1.12             | -12.89           | 1        | 7           | 0      | 528.399         | 6              | COC1ccc(cc1)[C@H]2CC3=NC(=C)C([C@H](C3C(=O)C2)c4cc(c(c4)Br)O)C)C(=O)OC     |
| ZINC08440125 | 5.54  | -0.14             | -12.15           | 1        | 7           | 0      | 528.399         | 6              | COC1ccc(cc1)[C@H]2CC3=NC(=C)C([C@H](C3C(=O)C2)c4cc(c(c4)Br)O)C)C(=O)OC     |
| ZINC08440125 | 5.35  | -1.24             | -14.47           | 1        | 7           | 0      | 528.399         | 6              | CC1=C([C@H]([C@H]2C(=N1)C[C@H](CC2=O)c3ccc(cc3)O)c4cc(c(c4)Br)O)C)C(=O)OC  |
| ZINC08440124 | 5.35  | -1.25             | -13.75           | 1        | 7           | 0      | 528.399         | 6              | CC1=NC2=C([C@H](C1C(=O)O)C3cc(c(c(c3)Br)O)C)C(=O)C[C@H](C2)c4ccc(cc4)OC    |
| ZINC08440124 | 5.54  | -1.12             | -13.54           | 1        | 7           | 0      | 528.399         | 6              | COC1ccc(cc1)[C@H]2CC3=NC(=C)C([C@H](C3C(=O)C2)c4cc(c(c4)Br)O)C)C(=O)OC     |
| ZINC08440124 | 5.54  | 0.26              | -25.83           | 1        | 7           | 0      | 528.399         | 6              | COC1ccc(cc1)[C@H]2CC3=NC(=C)C([C@H](C3C(=O)C2)c4cc(c(c4)Br)O)C)C(=O)OC     |
| ZINC08440124 | 5.35  | -1.39             | -15.02           | 1        | 7           | 0      | 528.399         | 6              | CC1=C([C@H]([C@H]2C(=N1)C[C@H](CC2=O)c3ccc(cc3)O)c4cc(c(c4)Br)O)C)C(=O)OC  |
| ZINC08440123 | 5.11  | 13.11             | -19.65           | 2        | 6           | 0      | 465.553         | 5              | CC1=C([C@H](C2=C(N1)C[C@H](CC2=O)c3ccc(c3)c4ccc(cc4)OC)C)C(=O)Nc5cccnc5    |
| ZINC08440123 | 5.25  | 11.23             | -20              | 1        | 6           | 0      | 465.553         | 5              | COC1ccc(cc1)[C@H]2C3C(=NC(=O)C2C(=O)Nc4cccnc4)C[C@H](CC3=O)c5cccnc5        |
| ZINC08440123 | 5.25  | 12.17             | -22.54           | 1        | 6           | 0      | 465.553         | 5              | COC1ccc(cc1)[C@H]2[C@H]3C(=NC(=O)C2C(=O)Nc4cccnc4)C[C@H](CC3=O)c5cccnc5    |
| ZINC08440122 | 5.35  | -1.37             | -10.98           | 1        | 7           | 0      | 528.399         | 6              | CC1=NC2=C([C@H](C1C(=O)O)C3cc(c(c(c3)Br)O)C)C(=O)C[C@H](C2)c4ccc(cc4)OC    |
| ZINC08440122 | 5.54  | 0.1               | -16.62           | 1        | 7           | 0      | 528.399         | 6              | COC1ccc(cc1)[C@H]2CC3=NC(=C)C([C@H](C3C(=O)C2)c4cc(c(c4)Br)O)C)C(=O)OC     |
| ZINC08440122 | 5.35  | -1.35             | -15.06           | 1        | 7           | 0      | 528.399         | 6              | CC1=C([C@H]([C@H]2C(=N1)C[C@H](CC2=O)c3ccc(cc3)O)c4cc(c(c4)Br)O)C)C(=O)OC  |
| ZINC08440121 | 5.35  | -1.25             | -13.04           | 1        | 7           | 0      | 528.399         | 6              | CC1=NC2=C([C@H](C1C(=O)O)C3cc(c(c(c3)Br)O)C)C(=O)C[C@H](C2)c4ccc(cc4)OC    |
| ZINC08440121 | 5.54  | -1.21             | -13.46           | 1        | 7           | 0      | 528.399         | 6              | COC1ccc(cc1)[C@H]2CC3=NC(=C)C([C@H](C3C(=O)C2)c4cc(c(c4)Br)O)C)C(=O)OC     |
| ZINC08440121 | 5.54  | 0                 | -13.58           | 1        | 7           | 0      | 528.399         | 6              | COC1ccc(cc1)[C@H]2CC3=NC(=C)C([C@H](C3C(=O)C2)c4cc(c(c4)Br)O)C)C(=O)OC     |
| ZINC08440121 | 5.35  | -1.47             | -15.08           | 1        | 7           | 0      | 528.399         | 6              | CC1=C([C@H]([C@H]2C(=N1)C[C@H](CC2=O)c3ccc(cc3)O)c4cc(c(c4)Br)O)C)C(=O)OC  |
| ZINC08440120 | 6.03  | 14.33             | -59.81           | 0        | 5           | -1     | 468.573         | 10             | CCOCc1ccc(cc1)C(=O)C2=C(C(=O)N)C@H2c3ccc(cc3)C[C@H]4c4ccc(c4)O-            |
| ZINC08440120 | 6.48  | 0.7               | -26.92           | 1        | 5           | 0      | 469.581         | 9              | CCOCc1ccc(cc1)C=C2[C@H](N(C(=O)C2=O)CCc3ccc(c3)c4ccc(cc4)CC)O              |
| ZINC08440120 | 5.45  | 0.99              | -20.68           | 0        | 5           | 0      | 469.581         | 10             | CCOCc1ccc(cc1)C(=O)[C@H]2[C@H](N(C(=O)C2=O)CCc3ccc(c3)c4ccc(cc4)CC         |
| ZINC08440119 | 6.19  | 11.9              | -19.11           | 2        | 7           | 0      | 590.898         | 9              | CCOC1cc(ccc1O)Br[C@H]2C3=C(C(=O)C2C(=O)Nc4cccnc4)C[C@H](CC3=O)OCCOC        |
| ZINC08440119 | 6.15  | -2.17             | -11.28           | 1        | 7           | 0      | 590.898         | 9              | CCOC1cc(ccc1O)Br[C@H]2C3=C(C(=O)C2C(=O)Nc4cccnc4)C[C@H](CC3=O)OCCOC        |
| ZINC08440118 | 6.19  | 11.84             | -19.33           | 2        | 7           | 0      | 590.898         | 9              | CCOC1cc(ccc1O)Br[C@H]2C3=C(C(=O)C2C(=O)Nc4cccnc4)C[C@H](CC3=O)OCCOC        |
| ZINC08440118 | 6.15  | -2.03             | -12.21           | 1        | 7           | 0      | 590.898         | 9              | CCOC1cc(ccc1O)Br[C@H]2C3=C(C(=O)C2C(=O)Nc4cccnc4)C[C@H](CC3=O)OCCOC        |
| ZINC08440117 | 6.13  | 14.41             | -59.72           | 0        | 5           | -1     | 468.573         | 9              | CCOCc1ccc(cc1)C(=O)C2=C(C(=O)N)C@H2c3ccc(cc3)C[C@H]4c4ccc(c4)O-            |
| ZINC08440117 | 6.57  | 1.19              | -27.3            | 1        | 5           | 0      | 469.581         | 8              | CCOCc1ccc(cc1)C=C2[C@H](N(C(=O)C2=O)CCc3ccc(c3)c4ccc(cc4)C)C)O             |
| ZINC08440117 | 5.54  | 1.41              | -19.46           | 0        | 5           | 0      | 469.581         | 9              | CCOCc1ccc(cc1)C(=O)[C@H]2[C@H](N(C(=O)C2=O)CCc3ccc(c3)c4ccc(cc4)C)C)C      |
| ZINC08440116 | 6.19  | 11.89             | -18.95           | 2        | 7           | 0      | 590.898         | 9              | CCOC1cc(ccc1O)Br[C@H]2C3=C(C(=O)C2C(=O)Nc4cccnc4)C[C@H](CC3=O)OCCOC        |
| ZINC08440116 | 6.31  | -3.47             | -9.9             | 1        | 7           | 0      | 590.898         | 9              | CCOC1cc(ccc1O)Br[C@H]2C3C(=O)C[C@H](C=C3N=C(C2C(=O)O)C)C4ccc(cc4)Cl        |
| ZINC08440115 | 5.11  | 13.11             | -19.45           | 2        | 6           | 0      | 465.553         | 5              | CC1=C([C@H](C2=C(N1)C[C@H](CC2=O)c3ccc(c3)c4ccc(cc4)OC)C)C(=O)Nc5cccnc5    |
| ZINC08440115 | 5.25  | 11.39             | -13.94           | 1        | 6           | 0      | 465.553         | 5              | COC1ccc(cc1)[C@H]2C3C(=NC(=O)C2C(=O)Nc4cccnc4)C[C@H](CC3=O)c5cccnc5        |
| ZINC08440115 | 5.25  | 12.27             | -14.53           | 1        | 6           | 0      | 465.553         | 5              | COC1ccc(cc1)[C@H]2[C@H]3C(=NC(=O)C2C(=O)Nc4cccnc4)C[C@H](CC3=O)c5cccnc5    |
| ZINC08440114 | 6.19  | 11.84             | -19.44           | 2        | 7           | 0      | 590.898         | 9              | CCOC1cc(ccc1O)Br[C@H]2C3=C(C(=O)C2C(=O)Nc4cccnc4)C[C@H](CC3=O)OCCOC        |
| ZINC08440114 | 6.15  | -2.06             | -11.97           | 1        | 7           | 0      | 590.898         | 9              | CCOC1cc(ccc1O)Br[C@H]2C3=C(C(=O)C2C(=O)Nc4cccnc4)C[C@H](CC3=O)OCCOC        |
| ZINC08440113 | 6.13  | 14.02             | -60.24           | 0        | 5           | -1     | 468.573         | 9              | CCOCc1ccc(cc1)C=C2=C(C(=O)N)C@H2c3ccc(cc3)C[C@H]4c4ccc(c4)O-               |
| ZINC08440113 | 6.57  | 0.94              | -27.16           | 1        | 5           | 0      | 469.581         | 8              | CCOCc1ccc(cc1)C=C2[C@H](N(C(=O)C2=O)CCc3ccc(c3)c4ccc(cc4)C)C)O             |
| ZINC08440113 | 5.54  | 1.24              | -20.88           | 0        | 5           | 0      | 469.581         | 9              | CCOCc1ccc(cc1)C(=O)[C@H]2[C@H](N(C(=O)C2=O)CCc3ccc(c3)c4ccc(cc4)C)C)C      |
| ZINC02061975 | 5.99  | 0.65              | -16.1            | 1        | 6           | 0      | 454.917         | 6              | c1ccc(cc1)COC2cccc(c2)C(=O)Nc3ccc4c(c3)nn(n4)c5ccc(cc5)Cl                  |
| ZINC08440108 | 5.86  | 1.02              | -17.57           | 1        | 7           | 0      | 563.65          | 12             | CCOC1ccc(cc1)C(=O)C2=C(C(=O)N)C@H2c3ccc(c3)O)C4c4ccc(c4)CC5cccnc5          |
| ZINC08440108 | 5.27  | 0.87              | -23.4            | 0        | 7           | 0      | 563.65          | 12             | CCOC1ccc(cc1)C(=O)[C@H]2[C@H](N(C(=O)C2=O)CCc3ccc(c3)c4ccc(cc4)O)C5cccnc5  |
| ZINC02061964 | 6.82  | -1.32             | -13.62           | 1        | 5           | 0      | 454.913         | 6              | c1ccc(cc1)COC2cccc(c2)C(=O)Nc3ccc4c(c3)nn(c4)c5ccc(cc5)Cl                  |
| ZINC08440106 | 5.86  | 1.07              | -17.49           | 1        | 7           | 0      | 563.65          | 12             | CCOC1ccc(cc1)C(=O)C2=C(C(=O)N)C@H2c3ccc(c3)O)C4c4ccc(c4)CC5cccnc5          |
| ZINC08440106 | 5.27  | 0.96              | -25.12           | 0        | 7           | 0      | 563.65          | 12             | CCOC1ccc(cc1)C(=O)[C@H]2[C@H](N(C(=O)C2=O)CCc3ccc(c3)c4ccc(cc4)O)C5cccnc5  |
| ZINC08440105 | 6.97  | -0.52             | -17.74           | 1        | 5           | 0      | 448.522         | 6              | Cc1cc(c2c(c1)nc(o2)c3ccc(cc3)N)C(=O)c4ccc(cc4)OC5cccnc5                    |
| ZINC02061963 | 6.14  | -1.16             | -22.07           | 1        | 5           | 0      | 420.468         | 6              | c1ccc(cc1)COC2cccc(c2)C(=O)Nc3ccc(c3)c4nc5cccnc5                           |
| ZINC02061962 | 7.53  | -0.73             | -18.28           | 1        | 5           | 0      | 428.532         | 10             | CCCCCOCc1ccc(cc1)C(=O)Nc2ccc(c2)c3nc4cccnc4                                |
| ZINC08440104 | 6.27  | 0.73              | -18.18           | 1        | 6           | 0      | 533.624         | 11             | CCOC1ccc(cc1)C(=O)C2=C(C(=O)N)C@H2c3ccc(cc3)O)C4c4ccc(c4)CC5cccnc5         |
| ZINC08440104 | 5.68  | 0.58              | -21.25           | 0        | 6           | 0      | 533.624         | 11             | CCOC1ccc(cc1)C(=O)[C@H]2[C@H](N(C(=O)C2=O)CCc3ccc(c3)c4ccc(cc4)O)C5cccnc5  |
| ZINC00441990 | 1.01  | 0.02              | -51.41           | 1        | 5           | 1      | 312.393         | 4              | COC1ccc(cc1)C[NH+]2CCN(C2)C(=O)c3cccnc3                                    |
| ZINC08440103 | 5.76  | 12.75             | -21.23           | 2        | 5           | 0      | 461.562         | 3              | CC1=C([C@H](C2=C(N1)CC(C2=O)C)C)C3ccc(c3)F)C(=O)Nc4nc5cccnc5               |
| ZINC08440103 | 5.9   | -1.87             | -12.96           | 1        | 5           | 0      | 461.562         | 3              | CC1(C2=NC(=O)C)C([C@H](C2C(=O)C)F)C3ccc(c3)F)C(=O)Nc4nc5cccnc5             |
| ZINC08440103 | 5.9   | -0.46             | -18.43           | 1        | 5           | 0      | 461.562         | 3              | CC1(C2=NC(=O)C)C([C@H](C2C(=O)C)F)C3ccc(c3)F)C(=O)Nc4nc5cccnc5             |
| ZINC08440102 | 7.16  | -1.68             | -11.09           | 1        | 6           | 0      | 523.77          | 5              | COC1ccc(cc1)Br)c2nc3cc(c3o2)N(C(=O)c4ccc(cc4)c5ccc(cc5)Cl                  |
| ZINC08440101 | 6.27  | 0.7               | -15.13           | 1        | 6           | 0      | 533.624         | 11             | CCOCc1ccc(cc1)C(=O)C2=C(C(=O)N)C@H2c3ccc(cc3)O)C4c4ccc(c4)CC5cccnc5        |
| ZINC08440101 | 5.68  | 0.62              | -22.99           | 0        | 6           | 0      | 533.624         | 11             | CCOCc1ccc(cc1)C(=O)[C@H]2[C@H](N(C(=O)C2=O)CCc3ccc(c3)c4ccc(cc4)O)C5cccnc5 |



Supplementary Table S2:

Detailed table of XP Docking using Schrodinger's Glide module

| ZINC_ID      | xLogP | ApolarDesolvation | PolarDesolvation | H Donors | H Acceptors | Charge | MolecularWeight | RotatableBonds | SMILES                                                                           |
|--------------|-------|-------------------|------------------|----------|-------------|--------|-----------------|----------------|----------------------------------------------------------------------------------|
| ZINC00702367 | 4.48  | 0.93              | -21.48           | 0        | 5           | 0      | 441.527         | 8              | CCOC1ccc(cc1)C(=O)C@H2[C@@H](N(C(=O)C2=O)CCc3cccc3)c4ccc(cc4)C                   |
| ZINC04458647 | -2.54 | -13.69            | -68.23           | 3        | 10          | 0      | 582.751         | 12             | [H]/N=C/[C/C1[n+][c2cccc2s1]CCCS(=O)N(=O)O-]\(C=C/3AN[e4cccc4S]CCCS(=O)N(=O)N    |
| ZINC08440083 | 7.61  | 14.64             | -11.67           | 1        | 6           | 0      | 660.189         | 5              | c1ccc(cc1)e2csc[n2]N3C(=O)/C(=N)N4c(ccc4Br)Br)/C(=N)3c5cccc5                     |
| ZINC08440081 | 3.87  | 11.19             | -42.88           | 0        | 8           | -1     | 502.543         | 10             | COc1ccc(cc1)C(=O)C2=C(C(=O)N)[C@H]2c3ccc(c(c3)OC)OC)CCc4cccc4)[O-]               |
| ZINC08440081 | 4.32  | 1.25              | -30.7            | 1        | 8           | 0      | 503.551         | 9              | COc1ccc(cc1)C(=O)C2=C(C(=O)N)[C@H]2c3ccc(c(c3)OC)OC)CCc4cccc4)[O-]               |
| ZINC08440081 | 3.29  | 1.46              | -24.93           | 0        | 8           | 0      | 503.551         | 10             | COc1ccc(cc1)C(=O)C2=C(C(=O)N)[C@H]2c3ccc(c(c3)OC)OC)CCc4cccc4)[O-]               |
| ZINC08440080 | 4.94  | 3.09              | -19.36           | 0        | 6           | 0      | 508.533         | 4              | c1ccc2(c1)-c3cccc3C2(c4ccc(cc4)N5C(=O)C=C5=O)c6ccc(cc6)N7C(=O)C=CC7=O            |
| ZINC08440078 | 1.89  | -2.94             | -19.72           | 2        | 7           | 0      | 305.363         | 5              | CCOC1ccc(cc1)/N=N/[C@@H]2C(=O)C(=O)C(S)N/C                                       |
| ZINC08440077 | 3.87  | 10.75             | -40.97           | 0        | 8           | -1     | 502.543         | 10             | COc1ccc(cc1)C(=O)C2=C(C(=O)N)[C@H]2c3ccc(c(c3)OC)OC)CCc4cccc4)[O-]               |
| ZINC08440077 | 4.32  | 1.36              | -31.47           | 1        | 8           | 0      | 503.551         | 9              | COc1ccc(cc1)C(=O)C2=C(C(=O)N)[C@H]2c3ccc(c(c3)OC)OC)CCc4cccc4)[O-]               |
| ZINC08440077 | 3.29  | 1.57              | -23.99           | 0        | 8           | 0      | 503.551         | 10             | COc1ccc(cc1)C(=O)C2=C(C(=O)N)[C@H]2c3ccc(c(c3)OC)OC)CCc4cccc4)[O-]               |
| ZINC08440075 | 5.22  | 13.69             | -61.22           | 0        | 6           | -1     | 483.588         | 10             | CCCOC1ccc(cc1)C(=O)C2=C(C(=O)N)[C@H]2c3ccc(cc3)N(C)C)CCc4cccc4)[O-]              |
| ZINC02061504 | 7.54  | 2.4               | -15.62           | 1        | 3           | 0      | 428.535         | 7              | c1ccc(cc1)/C=C/C(=NNC(=O)c2ccc(cc2)c3cccc3)/C=C/c4cccc4                          |
| ZINC08440073 | 5.22  | 13.3              | -61.61           | 0        | 6           | -1     | 483.588         | 10             | CCCOC1ccc(cc1)C(=O)C2=C(C(=O)N)[C@H]2c3ccc(cc3)N(C)C)CCc4cccc4)[O-]              |
| ZINC08440072 | 8.19  | 1.67              | -10.96           | 1        | 2           | 0      | 398.679         | 15             | CCCCCCCCCCCCCn1c2c(c(=N)c3c1CCC3)CCC2                                            |
| ZINC08440071 | 5.96  | 15.46             | -44.68           | 0        | 5           | -1     | 474.536         | 7              | Cc1ccc(cc1)C(=O)C2=C(C(=O)N)[C@H]2c3ccc(cc3)O4cccc4)C5cccc5)[O-]                 |
| ZINC08440071 | 6.4   | 0.76              | -25.7            | 1        | 5           | 0      | 475.544         | 6              | Cc1ccc(cc1)C(=O)C2=C(C(=O)N)[C@H]2c3ccc(cc3)c4ccc(cc4)O5cccc5)O                  |
| ZINC08440071 | 5.37  | 1.02              | -20.21           | 0        | 5           | 0      | 475.544         | 7              | Cc1ccc(cc1)C(=O)C2=C(C(=O)N)[C@H]2c3ccc(cc3)c4ccc(cc4)O5cccc5)O                  |
| ZINC08440070 | 5.09  | 4.46              | -26.86           | 0        | 2           | 1      | 457.641         | 2              | CC\1(c2ccc3cccc3e2N/C1=C/C/C4=N+)[c5ccc6cccc6c5C4(C)C]C/C                        |
| ZINC08440068 | 5.96  | 14.59             | -43.96           | 0        | 5           | -1     | 474.536         | 7              | Cc1ccc(cc1)C(=O)C2=C(C(=O)N)[C@H]2c3ccc(cc3)O4cccc4)C5cccc5)[O-]                 |
| ZINC08440068 | 6.4   | 0.77              | -25.08           | 1        | 5           | 0      | 475.544         | 6              | Cc1ccc(cc1)C(=O)C2=C(C(=O)N)[C@H]2c3ccc(cc3)c4ccc(cc4)O5cccc5)O                  |
| ZINC08440068 | 5.37  | 1.02              | -21.04           | 0        | 5           | 0      | 475.544         | 7              | Cc1ccc(cc1)C(=O)C2=C(C(=O)N)[C@H]2c3ccc(cc3)c4ccc(cc4)O5cccc5)O                  |
| ZINC03176061 | 6.51  | 1.14              | -8.57            | 1        | 5           | 0      | 424.696         | 3              | c1ccc(cc1)Nc2nnc(s2)c3ccc(cc3)O4cccc4)O                                          |
| ZINC02061497 | 6.68  | 1.75              | -11.38           | 1        | 6           | 0      | 461.374         | 6              | CCN(CC)c1ccc2cc(c(=O)oc2c1)c3nnc(s3)N4cccc(cc4)Cl                                |
| ZINC08047183 | 5.96  | -1.33             | -26.84           | 1        | 6           | 0      | 429.863         | 4              | CCN1cc2cccc2cc1C(=O)Nc3ccc(c(c3)c4nc5c(c4)occc5)Cl                               |
| ZINC08440067 | 5.93  | 14.49             | -62.1            | 0        | 4           | -1     | 438.547         | 6              | Cc1ccc(cc1)C(=O)C2=C(C(=O)N)[C@H]2c3ccc(cc3)C(C)C)C4cccc4)[O-]                   |
| ZINC08440067 | 6.38  | 1.77              | -26.7            | 1        | 4           | 0      | 439.555         | 5              | Cc1ccc(cc1)C(=O)C2=C(C(=O)N)[C@H]2c3ccc(cc3)c4ccc(cc4)C(C)C)O                    |
| ZINC08440067 | 5.35  | 2.06              | -19.17           | 0        | 4           | 0      | 439.555         | 6              | Cc1ccc(cc1)C(=O)C2=C(C(=O)N)[C@H]2c3ccc(cc3)c4ccc(cc4)C(C)C)C                    |
| ZINC01954273 | 6.64  | 0.53              | -8.4             | 1        | 5           | 0      | 469.147         | 3              | c1ccc(cc1)Nc2nnc(s2)c3ccc(cc3)O4cccc4)Br                                         |
| ZINC08440066 | 5.63  | 1.29              | -10.42           | 0        | 7           | 0      | 452.894         | 5              | CC1=NC2=C([C@@H](C1C(=O)OC)c3ccc(cc3)N+)[=O]O-]C(=O)C[C@@H](C2)c4ccc(cc4)Cl      |
| ZINC08440066 | 5.81  | 1.52              | -11.47           | 0        | 7           | 0      | 452.894         | 5              | COc1=O[C1][C@@H]([C2C(=NC1=C)C[C@@H](CC2=O)c3ccc(cc3)Cl)c4ccc(cc4)N+][=O]O-      |
| ZINC08440066 | 5.81  | 2.74              | -16.98           | 0        | 7           | 0      | 452.894         | 5              | COc1=O[C1][C@@H]([C@@H]2C(=NC1=O)C[C@@H](CC2=O)c3ccc(cc3)Cl)c4ccc(cc4)N+][=O]O-  |
| ZINC08440066 | 5.63  | 1.4               | -14.02           | 0        | 7           | 0      | 452.894         | 5              | CC1=C([C@@H]([C@@H]2C(=N1)C[C@@H](CC2=O)c3ccc(cc3)Cl)c4ccc(cc4)N+)[=O]O-]C(=O)OC |
| ZINC08440065 | 5.93  | 13.62             | -62.02           | 0        | 4           | -1     | 438.547         | 6              | Cc1ccc(cc1)C(=O)C2=C(C(=O)N)[C@H]2c3ccc(cc3)C(C)C)C4cccc4)[O-]                   |
| ZINC08440065 | 6.38  | 1.28              | -26.64           | 1        | 4           | 0      | 439.555         | 5              | Cc1ccc(cc1)C(=O)C2=C(C(=O)N)[C@H]2c3ccc(cc3)c4ccc(cc4)C(C)C)O                    |
| ZINC08440065 | 5.35  | 1.58              | -21.16           | 0        | 4           | 0      | 439.555         | 6              | Cc1ccc(cc1)C(=O)C2=C(C(=O)N)[C@H]2c3ccc(cc3)c4ccc(cc4)C(C)C)C                    |
| ZINC08440064 | 5.63  | 1.4               | -12.79           | 0        | 7           | 0      | 452.894         | 5              | CC1=NC2=C([C@@H](C1C(=O)OC)c3ccc(cc3)N+)[=O]O-]C(=O)C[C@@H](C2)c4ccc(cc4)Cl      |
| ZINC08440064 | 5.81  | 1.51              | -13.13           | 0        | 7           | 0      | 452.894         | 5              | COc1=O[C1][C@@H]([C2C(=NC1=C)C[C@@H](CC2=O)c3ccc(cc3)Cl)c4ccc(cc4)N+][=O]O-      |
| ZINC08440064 | 5.81  | 2.65              | -13.19           | 0        | 7           | 0      | 452.894         | 5              | COc1=O[C1][C@@H]([C@@H]2C(=NC1=C)C[C@@H](CC2=O)c3ccc(cc3)Cl)c4ccc(cc4)N+][=O]O-  |
| ZINC08440064 | 5.63  | 1.26              | -14.99           | 0        | 7           | 0      | 452.894         | 5              | CC1=C([C@@H]([C@@H]2C(=N1)C[C@@H](CC2=O)c3ccc(cc3)Cl)c4ccc(cc4)N+)[=O]O-]C(=O)OC |
| ZINC08440063 | 5.63  | 1.31              | -10.34           | 0        | 7           | 0      | 452.894         | 5              | CC1=NC2=C([C@@H]([C1C(=O)OC)c3ccc(cc3)N+)[=O]O-]C(=O)C[C@@H](C2)c4ccc(cc4)Cl     |
| ZINC08440063 | 5.81  | 1.34              | -12.1            | 0        | 7           | 0      | 452.894         | 5              | COc1=O[C1][C@@H]([C2C(=NC1=C)C[C@@H](CC2=O)c3ccc(cc3)Cl)c4ccc(cc4)N+][=O]O-      |
| ZINC08440063 | 5.81  | 2.62              | -11.21           | 0        | 7           | 0      | 452.894         | 5              | COc1=O[C1][C@@H]([C@@H]2C(=N1)C[C@@H](CC2=O)c3ccc(cc3)Cl)c4ccc(cc4)N+][=O]O-     |
| ZINC08440063 | 5.63  | 1.55              | -13.96           | 0        | 7           | 0      | 452.894         | 5              | CC1=C([C@@H]([C@@H]2C(=N1)C[C@@H](CC2=O)c3ccc(cc3)Cl)c4ccc(cc4)N+)[=O]O-]C(=O)OC |
| ZINC08440062 | 5.63  | 1.28              | -10.58           | 0        | 7           | 0      | 452.894         | 5              | CC1=NC2=C([C@@H](C1C(=O)OC)c3ccc(cc3)N+)[=O]O-]C(=O)C[C@@H](C2)c4ccc(cc4)Cl      |
| ZINC08440062 | 5.81  | 1.51              | -12.1            | 0        | 7           | 0      | 452.894         | 5              | COc1=O[C1][C@@H]([C2C(=NC1=C)C[C@@H](CC2=O)c3ccc(cc3)Cl)c4ccc(cc4)N+][=O]O-      |
| ZINC08440062 | 5.81  | 2.5               | -10.88           | 0        | 7           | 0      | 452.894         | 5              | COc1=O[C1][C@@H]([C@@H]2C(=N1)C[C@@H](CC2=O)c3ccc(cc3)Cl)c4ccc(cc4)N+][=O]O-     |
| ZINC08440062 | 5.63  | 1.4               | -14.35           | 0        | 7           | 0      | 452.894         | 5              | CC1=C([C@@H]([C@@H]2C(=N1)C[C@@H](CC2=O)c3ccc(cc3)Cl)c4ccc(cc4)N+)[=O]O-]C(=O)OC |
| ZINC08440061 | 6.45  | 2.13              | -11.03           | 0        | 6           | 0      | 499.607         | 7              | CC1=NC2=C([C@@H](C1C(=O)OC)C3CCCC3)c4ccc(cc4)OC(=O)C(=O)C[C@@H](C2)c5cccc5       |
| ZINC08440061 | 6.63  | 2.36              | -12.28           | 0        | 6           | 0      | 499.607         | 7              | CC(=O)O1ccc(cc1)[C@H]2C3C(=NC(=O)C2C(=O)OC4CCCC4)C[C@@H](CC3=O)c5cccc5           |
| ZINC08440061 | 6.63  | 3.58              | -18.68           | 0        | 6           | 0      | 499.607         | 7              | CC(=O)O1ccc(cc1)[C@H]2[C@@H]3C(=NC(=O)C2C(=O)OC4CCCC4)C[C@@H](CC3=O)c5cccc5      |
| ZINC08440061 | 6.45  | 2.24              | -14.91           | 0        | 6           | 0      | 499.607         | 7              | CC1=C([C@@H]([C@@H]2C(=N1)C[C@@H](CC2=O)c3ccc3c4ccc(cc4)OC(=O)C)C(=O)OC5CCCC5    |
| ZINC08440060 | 6.45  | 2.02              | -11.6            | 0        | 6           | 0      | 499.607         | 7              | CC1=NC2=C([C@@H](C1C(=O)OC)C3CCCC3)c4ccc(cc4)OC(=O)C(=O)C[C@@H](C2)c5cccc5       |
| ZINC08440060 | 6.63  | 2.09              | -13.25           | 0        | 6           | 0      | 499.607         | 7              | CC(=O)O1ccc(cc1)[C@H]2C3C(=NC(=O)C2C(=O)OC4CCCC4)C[C@@H](CC3=O)c5cccc5           |
| ZINC08440060 | 6.63  | 3.44              | -19.2            | 0        | 6           | 0      | 499.607         | 7              | CC(=O)O1ccc(cc1)[C@H]2[C@@H]3C(=NC(=O)C2C(=O)OC4CCCC4)C[C@@H](CC3=O)c5cccc5      |
| ZINC08440060 | 6.45  | 2.12              | -15.41           | 0        | 6           | 0      | 499.607         | 7              | CC1=C([C@@H]([C@@H]2C(=N1)C[C@@H](CC2=O)c3ccc3c4ccc(cc4)OC(=O)C)C(=O)OC5CCCC5    |
| ZINC08440059 | 5.99  | 1                 | -18.43           | 1        | 5           | 0      | 427.595         | 8              | Cc1ccc(cc1)CSc2nnc(s2)NC(=O)OC3ccc(cc3)C(C)C)C                                   |
| ZINC08440058 | 6.45  | 2.13              | -11.53           | 0        | 6           | 0      | 499.607         | 7              | CC1=NC2=C([C@@H](C1C(=O)OC)C3CCCC3)c4ccc(cc4)OC(=O)C(=O)C[C@@H](C2)c5cccc5       |
| ZINC08440058 | 6.63  | 2.27              | -12.42           | 0        | 6           | 0      | 499.607         | 7              | CC(=O)O1ccc(cc1)[C@H]2C3C(=NC(=O)C2C(=O)OC4CCCC4)C[C@@H](CC3=O)c5cccc5           |
| ZINC08440058 | 6.63  | 3.6               | -17.77           | 0        | 6           | 0      | 499.607         | 7              | CC(=O)O1ccc(cc1)[C@H]2[C@@H]3C(=NC(=O)C2C(=O)OC4CCCC4)C[C@@H](CC3=O)c5cccc5      |
| ZINC08440058 | 6.45  | 2.17              | -13.76           | 0        | 6           | 0      | 499.607         | 7              | CC1=C([C@@H]([C@@H]2C(=N1)C[C@@H](CC2=O)c3ccc3c4ccc(cc4)OC(=O)C)C(=O)OC5CCCC5    |

Supplementary Table S2:

Detailed table of XP Docking using Schrodinger's Glide module

| ZINC_ID      | xLogP | ApolarDesolvation | PolarDesolvation | H Donors | H Acceptors | Charge | MolecularWeight | RotatableBonds | SMILES                                                                                                |
|--------------|-------|-------------------|------------------|----------|-------------|--------|-----------------|----------------|-------------------------------------------------------------------------------------------------------|
| ZINC08440057 | 6.45  | 2.11              | -11.23           | 0        | 6           | 0      | 499.607         | 7              | CC1=NC2=C([C@H](C1C(=O)OC3CCCC3)C4=CC(=O)C(=O)C(C(=O)C(C@H)(C2)C5=CC=CC=C5                            |
| ZINC08440057 | 6.63  | 2.17              | -13.33           | 0        | 6           | 0      | 499.607         | 7              | CC(=O)OC1=CC=C(C=C1)[C@H]2C3C(=NC(=O)C2)C(=O)OC4CCCC4[C@@H](C3=O)C5=CC=CC=C5                          |
| ZINC08440057 | 6.63  | 3.59              | -18.06           | 0        | 6           | 0      | 499.607         | 7              | CC(=O)OC1=CC=C(C=C1)[C@H]2[C@@H]3C(=NC(=O)C2)C(=O)OC4CCCC4[C@@H](C3=O)C5=CC=CC=C5                     |
| ZINC08440057 | 6.45  | 2.05              | -15.92           | 0        | 6           | 0      | 499.607         | 7              | CC1=C([C@@H]([C@H]2C(=N1)C[C@@H](CC2=O)C3=CC=CC=C3)C4=CC(=O)C(=O)C(C(=O)C(C@H)(C2)C5=CC=CC=C5         |
| ZINC08440056 | 6.81  | 0.3               | -14.73           | 1        | 5           | 0      | 441.622         | 11             | CCCCCOC1=CC=C(C(=O)Nc2nnc(s2)SCc3ccc(c3)C                                                             |
| ZINC08440055 | 6.69  | 0.23              | -10.95           | 0        | 6           | 0      | 507.586         | 7              | CC1=NC2=C([C@@H](C1C(=O)OC3=CC=CC=C3)C4=CC(=O)C(=O)C(C(=O)C(C@H)(C2)C6=CC=CC=C6                       |
| ZINC08440055 | 6.87  | 0.18              | -11.06           | 0        | 6           | 0      | 507.586         | 7              | C=C1C([C@H](C2C(=N1)C[C@@H](CC2=O)C3=CC=CC=C3)C4=CC(=O)C(=O)C(C(=O)C(C@H)(C2)C6=CC=CC=C6              |
| ZINC08440055 | 6.87  | 1.21              | -11.14           | 0        | 6           | 0      | 507.586         | 7              | C=C1C([C@H]([C@H]2C(=N1)C[C@@H](CC2=O)C3=CC=CC=C3)C4=CC(=O)C(=O)C(C(=O)C(C@H)(C2)C6=CC=CC=C6          |
| ZINC08440055 | 6.69  | 0.29              | -13.82           | 0        | 6           | 0      | 507.586         | 7              | CC1=C([C@H]([C@H]2C(=N1)C[C@@H](CC2=O)C3=CC=CC=C3)C4=CC(=O)C(=O)C(C(=O)C(C@H)(C2)C6=CC=CC=C6          |
| ZINC04391432 | 6.69  | 14.89             | -13.77           | 0        | 6           | 0      | 507.586         | 7              | CC1=NC2=C([C@H](C1C(=O)OC3=CC=CC=C3)C4=CC(=O)C(=O)C(C(=O)C(C@H)(C2)C6=CC=CC=C6                        |
| ZINC04391432 | 6.87  | 14.65             | -12.96           | 0        | 6           | 0      | 507.586         | 7              | C=C1C([C@H](C2C(=N1)C[C@@H](CC2=O)C3=CC=CC=C3)C4=CC(=O)C(=O)C(C(=O)C(C@H)(C2)C6=CC=CC=C6              |
| ZINC04391432 | 6.87  | 15.55             | -14.39           | 0        | 6           | 0      | 507.586         | 7              | C=C1C([C@H]([C@H]2C(=N1)C[C@@H](CC2=O)C3=CC=CC=C3)C4=CC(=O)C(=O)C(C(=O)C(C@H)(C2)C6=CC=CC=C6          |
| ZINC04391432 | 6.69  | 14.87             | -14.93           | 0        | 6           | 0      | 507.586         | 7              | CC1=C([C@H]([C@H]2C(=N1)C[C@@H](CC2=O)C3=CC=CC=C3)C4=CC(=O)C(=O)C(C(=O)C(C@H)(C2)C6=CC=CC=C6          |
| ZINC08440054 | 6.55  | -1.18             | -13.87           | 1        | 4           | 0      | 446.022         | 5              | Cc1ccc(cc1)CSc2nnc(s2)NC(=O)c3c(c4ccc(cc4s3)C)Cl                                                      |
| ZINC08440053 | 6.69  | 0.26              | -10.48           | 0        | 6           | 0      | 507.586         | 7              | CC1=NC2=C([C@H](C1C(=O)OC3=CC=CC=C3)C4=CC(=O)C(=O)C(C(=O)C(C@H)(C2)C6=CC=CC=C6                        |
| ZINC08440053 | 6.87  | 0.39              | -11.23           | 0        | 6           | 0      | 507.586         | 7              | C=C1C([C@H](C2C(=N1)C[C@@H](CC2=O)C3=CC=CC=C3)C4=CC(=O)C(=O)C(C(=O)C(C@H)(C2)C6=CC=CC=C6              |
| ZINC08440053 | 6.87  | 1.67              | -11.2            | 0        | 6           | 0      | 507.586         | 7              | C=C1C([C@H]([C@H]2C(=N1)C[C@@H](CC2=O)C3=CC=CC=C3)C4=CC(=O)C(=O)C(C(=O)C(C@H)(C2)C6=CC=CC=C6          |
| ZINC08440053 | 6.69  | 0.45              | -13.19           | 0        | 6           | 0      | 507.586         | 7              | CC1=C([C@H]([C@H]2C(=N1)C[C@@H](CC2=O)C3=CC=CC=C3)C4=CC(=O)C(=O)C(C(=O)C(C@H)(C2)C6=CC=CC=C6          |
| ZINC08440052 | 6.69  | 0.46              | -14.36           | 0        | 6           | 0      | 507.586         | 7              | CC1=NC2=C([C@H](C1C(=O)OC3=CC=CC=C3)C4=CC(=O)C(=O)C(C(=O)C(C@H)(C2)C6=CC=CC=C6                        |
| ZINC08440052 | 6.87  | 0.49              | -13.18           | 0        | 6           | 0      | 507.586         | 7              | C=C1C([C@H](C2C(=N1)C[C@@H](CC2=O)C3=CC=CC=C3)C4=CC(=O)C(=O)C(C(=O)C(C@H)(C2)C6=CC=CC=C6              |
| ZINC08440052 | 6.87  | 1.7               | -14.94           | 0        | 6           | 0      | 507.586         | 7              | C=C1C([C@H]([C@H]2C(=N1)C[C@@H](CC2=O)C3=CC=CC=C3)C4=CC(=O)C(=O)C(C(=O)C(C@H)(C2)C6=CC=CC=C6          |
| ZINC08440052 | 6.69  | 0.23              | -15.1            | 0        | 6           | 0      | 507.586         | 7              | CC1=C([C@H]([C@H]2C(=N1)C[C@@H](CC2=O)C3=CC=CC=C3)C4=CC(=O)C(=O)C(C(=O)C(C@H)(C2)C6=CC=CC=C6          |
| ZINC08440048 | 6.17  | 0.52              | -19.47           | 1        | 5           | 0      | 448.013         | 8              | CC(C)C1=CC=C(C=C1)OC(=O)Nc2nnc(s2)SCc3ccc(c3)Cl                                                       |
| ZINC08440047 | 7     | -0.18             | -15.65           | 1        | 5           | 0      | 462.04          | 11             | CCCCCOC1=CC=C(C(=O)Nc2nnc(s2)SCc3ccc(c3)Cl                                                            |
| ZINC08440045 | 6.8   | 1.07              | -10.91           | 0        | 5           | 0      | 514.021         | 7              | CC1=NC2=C([C@H](C1C(=O)OC3=CC=CC=C3)C4=CC(=O)C(=O)C(C(=O)C(C@H)(C2)C5=CC=CC=C5)Cl                     |
| ZINC08440045 | 6.98  | 1.13              | -11.84           | 0        | 5           | 0      | 514.021         | 7              | CO(=O)C1[C@@H]([C@H]2C(=N1)C[C@@H](CC2=O)C3=CC=CC=C3)C4=CC(=O)C(=O)C(C(=O)C(C@H)(C2)C5=CC=CC=C5       |
| ZINC08440045 | 6.98  | 2.46              | -12.92           | 0        | 5           | 0      | 514.021         | 7              | CO(=O)C1[C@@H]([C@H]2C(=N1)C[C@@H](CC2=O)C3=CC=CC=C3)C4=CC(=O)C(=O)C(C(=O)C(C@H)(C2)C5=CC=CC=C5       |
| ZINC08440045 | 6.8   | 1.01              | -14.25           | 0        | 5           | 0      | 514.021         | 7              | CC1=C([C@H]([C@H]2C(=N1)C[C@@H](CC2=O)C3=CC=CC=C3)C4=CC(=O)C(=O)C(C(=O)C(C@H)(C2)C5=CC=CC=C5)Cl(=O)OC |
| ZINC08440044 | 6.8   | 1.1               | -11.02           | 0        | 5           | 0      | 514.021         | 7              | CC1=NC2=C([C@H](C1C(=O)OC3=CC=CC=C3)C4=CC(=O)C(=O)C(C(=O)C(C@H)(C2)C5=CC=CC=C5)Cl                     |
| ZINC08440044 | 6.98  | 0.85              | -11.66           | 0        | 5           | 0      | 514.021         | 7              | CO(=O)C1[C@@H]([C@H]2C(=N1)C[C@@H](CC2=O)C3=CC=CC=C3)C4=CC(=O)C(=O)C(C(=O)C(C@H)(C2)C5=CC=CC=C5       |
| ZINC08440044 | 6.98  | 2.3               | -18.52           | 0        | 5           | 0      | 514.021         | 7              | CO(=O)C1[C@@H]([C@H]2C(=N1)C[C@@H](CC2=O)C3=CC=CC=C3)C4=CC(=O)C(=O)C(C(=O)C(C@H)(C2)C5=CC=CC=C5       |
| ZINC08440044 | 6.8   | 1.2               | -14.53           | 0        | 5           | 0      | 514.021         | 7              | CC1=C([C@H]([C@H]2C(=N1)C[C@@H](CC2=O)C3=CC=CC=C3)C4=CC(=O)C(=O)C(C(=O)C(C@H)(C2)C5=CC=CC=C5)Cl(=O)OC |
| ZINC08440043 | 6.8   | 1                 | -10.78           | 0        | 5           | 0      | 514.021         | 7              | CC1=NC2=C([C@H](C1C(=O)OC3=CC=CC=C3)C4=CC(=O)C(=O)C(C(=O)C(C@H)(C2)C5=CC=CC=C5)Cl                     |
| ZINC08440043 | 6.98  | 1.13              | -11.97           | 0        | 5           | 0      | 514.021         | 7              | CO(=O)C1[C@@H]([C@H]2C(=N1)C[C@@H](CC2=O)C3=CC=CC=C3)C4=CC(=O)C(=O)C(C(=O)C(C@H)(C2)C5=CC=CC=C5       |
| ZINC08440043 | 6.98  | 2.25              | -12.04           | 0        | 5           | 0      | 514.021         | 7              | CO(=O)C1[C@@H]([C@H]2C(=N1)C[C@@H](CC2=O)C3=CC=CC=C3)C4=CC(=O)C(=O)C(C(=O)C(C@H)(C2)C5=CC=CC=C5       |
| ZINC08440043 | 6.8   | 1.14              | -14.36           | 0        | 5           | 0      | 514.021         | 7              | CC1=C([C@H]([C@H]2C(=N1)C[C@@H](CC2=O)C3=CC=CC=C3)C4=CC(=O)C(=O)C(C(=O)C(C@H)(C2)C5=CC=CC=C5)Cl(=O)OC |
| ZINC0702349  | 3.92  | 9.67              | -18.84           | 1        | 6           | 0      | 419.915         | 5              | c1ccc(cc1)CSc2nnc(s2)NC(=O)[C@H]3OC4=CC=CC=C4O3)Cl                                                    |
| ZINC0702349  | 4.11  | 6.94              | -49.65           | 0        | 6           | -1     | 418.907         | 5              | c1ccc(cc1)CSc2nnc(s2)N=C([C@H]3OC4=CC=CC=C4O3)O-]Cl                                                   |
| ZINC08440042 | 6.8   | 1.2               | -15.15           | 0        | 5           | 0      | 514.021         | 7              | CC1=NC2=C([C@H](C1C(=O)OC3=CC=CC=C3)C4=CC(=O)C(=O)C(C(=O)C(C@H)(C2)C5=CC=CC=C5)Cl                     |
| ZINC08440042 | 6.98  | 1.23              | -14.93           | 0        | 5           | 0      | 514.021         | 7              | CO(=O)C1[C@@H]([C@H]2C(=N1)C[C@@H](CC2=O)C3=CC=CC=C3)C4=CC(=O)C(=O)C(C(=O)C(C@H)(C2)C5=CC=CC=C5       |
| ZINC08440042 | 6.98  | 2.44              | -15.96           | 0        | 5           | 0      | 514.021         | 7              | CO(=O)C1[C@@H]([C@H]2C(=N1)C[C@@H](CC2=O)C3=CC=CC=C3)C4=CC(=O)C(=O)C(C(=O)C(C@H)(C2)C5=CC=CC=C5       |
| ZINC08440042 | 6.8   | 0.97              | -16.52           | 0        | 5           | 0      | 514.021         | 7              | CC1=C([C@H]([C@H]2C(=N1)C[C@@H](CC2=O)C3=CC=CC=C3)C4=CC(=O)C(=O)C(C(=O)C(C@H)(C2)C5=CC=CC=C5)Cl(=O)OC |
| ZINC08440041 | 5.08  | 0.95              | -11.17           | 0        | 6           | 0      | 433.504         | 6              | CC1=NC2=C([C@H](C1C(=O)OC3=CC=CC=C3)C4=CC(=O)C(=O)C(C(=O)C(C@H)(C2)C4=CC(=O)C)Cl(=O)OC                |
| ZINC08440041 | 5.26  | 1.01              | -12.05           | 0        | 6           | 0      | 433.504         | 6              | COc1ccc(cc1)[C@H]2CC3=NC(=O)C1=C([C@H](C3(=O)C2)C4=CC(=O)C(=O)C(C(=O)C(C@H)(C2)C4=CC(=O)C)Cl(=O)OC    |
| ZINC08440041 | 5.26  | 2.34              | -13.38           | 0        | 6           | 0      | 433.504         | 6              | COc1ccc(cc1)[C@H]2CC3=NC(=O)C1=C([C@H](C3(=O)C2)C4=CC(=O)C(=O)C(C(=O)C(C@H)(C2)C4=CC(=O)C)Cl(=O)OC    |
| ZINC08440041 | 5.08  | 0.89              | -14.63           | 0        | 6           | 0      | 433.504         | 6              | CC1=C([C@H]([C@H]2C(=N1)C[C@@H](CC2=O)C3=CC=CC=C3)C4=CC(=O)C(=O)C(C(=O)C(C@H)(C2)C4=CC(=O)C)Cl(=O)OC  |
| ZINC08440040 | 5.08  | 1.06              | -15.52           | 0        | 6           | 0      | 433.504         | 6              | CC1=NC2=C([C@H](C1C(=O)OC3=CC=CC=C3)C4=CC(=O)C(=O)C(C(=O)C(C@H)(C2)C4=CC(=O)C)Cl(=O)OC                |
| ZINC08440040 | 5.26  | 1.18              | -14.92           | 0        | 6           | 0      | 433.504         | 6              | COc1ccc(cc1)[C@H]2CC3=NC(=O)C1=C([C@H](C3(=O)C2)C4=CC(=O)C(=O)C(C(=O)C(C@H)(C2)C4=CC(=O)C)Cl(=O)OC    |
| ZINC08440040 | 5.26  | 2.32              | -16.25           | 0        | 6           | 0      | 433.504         | 6              | COc1ccc(cc1)[C@H]2CC3=NC(=O)C1=C([C@H](C3(=O)C2)C4=CC(=O)C(=O)C(C(=O)C(C@H)(C2)C4=CC(=O)C)Cl(=O)OC    |
| ZINC08440040 | 5.08  | 0.93              | -16.69           | 0        | 6           | 0      | 433.504         | 6              | CC1=C([C@H]([C@H]2C(=N1)C[C@@H](CC2=O)C3=CC=CC=C3)C4=CC(=O)C(=O)C(C(=O)C(C@H)(C2)C4=CC(=O)C)Cl(=O)OC  |
| ZINC08440039 | 5.08  | 0.85              | -11.33           | 0        | 6           | 0      | 433.504         | 6              | CC1=NC2=C([C@H](C1C(=O)OC3=CC=CC=C3)C4=CC(=O)C(=O)C(C(=O)C(C@H)(C2)C4=CC(=O)C)Cl(=O)OC                |
| ZINC08440039 | 5.26  | 0.92              | -12.05           | 0        | 6           | 0      | 433.504         | 6              | COc1ccc(cc1)[C@H]2CC3=NC(=O)C1=C([C@H](C3(=O)C2)C4=CC(=O)C(=O)C(C(=O)C(C@H)(C2)C4=CC(=O)C)Cl(=O)OC    |
| ZINC08440039 | 5.26  | 2.18              | -13.58           | 0        | 6           | 0      | 433.504         | 6              | COc1ccc(cc1)[C@H]2CC3=NC(=O)C1=C([C@H](C3(=O)C2)C4=CC(=O)C(=O)C(C(=O)C(C@H)(C2)C4=CC(=O)C)Cl(=O)OC    |
| ZINC08440039 | 5.08  | 0.96              | -14.49           | 0        | 6           | 0      | 433.504         | 6              | CC1=C([C@H]([C@H]2C(=N1)C[C@@H](CC2=O)C3=CC=CC=C3)C4=CC(=O)C(=O)C(C(=O)C(C@H)(C2)C4=CC(=O)C)Cl(=O)OC  |
| ZINC08440038 | 5.08  | 1.07              | -15.33           | 0        | 6           | 0      | 433.504         | 6              | CC1=NC2=C([C@H](C1C(=O)OC3=CC=CC=C3)C4=CC(=O)C(=O)C(C(=O)C(C@H)(C2)C4=CC(=O)C)Cl(=O)OC                |
| ZINC08440038 | 5.26  | 1.28              | -14.95           | 0        | 6           | 0      | 433.504         | 6              | COc1ccc(cc1)[C@H]2CC3=NC(=O)C1=C([C@H](C3(=O)C2)C4=CC(=O)C(=O)C(C(=O)C(C@H)(C2)C4=CC(=O)C)Cl(=O)OC    |
| ZINC08440038 | 5.26  | 2.58              | -28.93           | 0        | 6           | 0      | 433.504         | 6              | COc1ccc(cc1)[C@H]2CC3=NC(=O)C1=C([C@H](C3(=O)C2)C4=CC(=O)C(=O)C(C(=O)C(C@H)(C2)C4=CC(=O)C)Cl(=O)OC    |
| ZINC08440038 | 5.08  | 1.03              | -16.48           | 0        | 6           | 0      | 433.504         | 6              | CC1=C([C@H]([C@H]2C(=N1)C[C@@H](CC2=O)C3=CC=CC=C3)C4=CC(=O)C(=O)C(C(=O)C(C@H)(C2)C4=CC(=O)C)Cl(=O)OC  |
| ZINC0702350  | 3.92  | 9.67              | -18.78           | 1        | 6           | 0      | 419.915         | 5              | c1ccc(cc1)CSc2nnc(s2)NC(=O)[C@H]3OC4=CC=CC=C4O3)Cl                                                    |
| ZINC0702350  | 4.11  | 6.93              | -49.68           | 0        | 6           | -1     | 418.907         | 5              | c1ccc(cc1)CSc2nnc(s2)N=C([C@H]3OC4=CC=CC=C4O3)O-]Cl                                                   |
| ZINC08440037 | 6     | 0.16              | -6.54            | 1        | 2           | 0      | 283.415         | 8              | CCCCCOC1=CC=C(C=C1)C2=CC(=O)C                                                                         |

**Supplementary Table S2:**  
**Detailed table of XP Docking using Schrodinger's Glide module**

| ZINC_ID      | sLogP | ApolarDesolvation | PolarDesolvation | H Donors | H Acceptors | Charge | MolecularWeight | RotatableBonds | SMILES                                                                                        |
|--------------|-------|-------------------|------------------|----------|-------------|--------|-----------------|----------------|-----------------------------------------------------------------------------------------------|
| ZINC00702345 | 5.38  | 0.39              | -13.96           | 1        | 4           | 0      | 432.373         | 6              | CC1([C@H]([C@H]1C(=O)Nc2nnc(s2)SCc3cccc3F)C=C(C)C)C                                           |
| ZINC08440036 | 5.01  | -0.83             | -11.05           | 1        | 6           | 0      | 453.922         | 5              | CC1=NC2=C([C@H]([C1C(=O)OC]c3ccc(c(c3)OC)C(=O)C[C@@H]([C2]c4ccc(cc4)C                         |
| ZINC08440036 | 5.19  | -0.77             | -12.13           | 1        | 6           | 0      | 453.922         | 5              | C0c1cc(ccc1O)[C@H]2C3C(=NC(=C)C2C(=O)OC)C[C@H]([C3=O])c4ccc(cc4)C                             |
| ZINC08440036 | 5.19  | 0.55              | -12.96           | 1        | 6           | 0      | 453.922         | 5              | C0c1cc(ccc1O)[C@H]2[C@@H]3C(=NC(=C)C2C(=O)OC)C[C@H]([C3=O])c4ccc(cc4)C                        |
| ZINC08440036 | 5.01  | -0.9              | -14.8            | 1        | 6           | 0      | 453.922         | 5              | CC1=C([C@H]([C@H]2C(=N1)C[C@H]([C2=O])c3ccc(cc3)C)C)4cccc(c(c4)OC)O[C](=O)OC                  |
| ZINC08440035 | 5.01  | -0.91             | -13.32           | 1        | 6           | 0      | 453.922         | 5              | CC1=NC2=C([C@H]([C1C(=O)OC]c3ccc(c(c3)OC)O)C(=O)C[C@@H]([C2]c4ccc(cc4)C                       |
| ZINC08440035 | 5.19  | -0.78             | -13.92           | 1        | 6           | 0      | 453.922         | 5              | C0c1cc(ccc1O)[C@H]2C3C(=NC(=C)C2C(=O)OC)C[C@H]([C3=O])c4ccc(cc4)C                             |
| ZINC08440035 | 5.19  | 0.36              | -13.87           | 1        | 6           | 0      | 453.922         | 5              | C0c1cc(ccc1O)[C@H]2[C@@H]3C(=NC(=C)C2C(=O)OC)C[C@H]([C3=O])c4ccc(cc4)C                        |
| ZINC08440035 | 5.01  | -0.87             | -16.18           | 1        | 6           | 0      | 453.922         | 5              | CC1=C([C@H]([C@H]2C(=N1)C[C@H]([C2=O])c3ccc(cc3)C)C)4cccc(c(c4)OC)O[C](=O)OC                  |
| ZINC0702347  | 5.38  | 0.51              | -15.11           | 1        | 4           | 0      | 432.373         | 6              | CC1([C@H]([C@H]1C(=O)Nc2nnc(s2)SCc3cccc3F)C=C(C)C)C                                           |
| ZINC08440034 | 5.01  | -0.94             | -11.41           | 1        | 6           | 0      | 453.922         | 5              | CC1=NC2=C([C@H]([C1C(=O)OC]c3ccc(c(c3)OC)C(=O)C[C@@H]([C2]c4ccc(cc4)C                         |
| ZINC08440034 | 5.19  | -0.86             | -12.66           | 1        | 6           | 0      | 453.922         | 5              | C0c1cc(ccc1O)[C@H]2C3C(=NC(=C)C2C(=O)OC)C[C@H]([C3=O])c4ccc(cc4)C                             |
| ZINC08440034 | 5.19  | 0.46              | -18.45           | 1        | 6           | 0      | 453.922         | 5              | C0c1cc(ccc1O)[C@H]2[C@@H]3C(=NC(=C)C2C(=O)OC)C[C@H]([C3=O])c4ccc(cc4)C                        |
| ZINC08440034 | 5.01  | -0.82             | -14.77           | 1        | 6           | 0      | 453.922         | 5              | CC1=C([C@H]([C@H]2C(=N1)C[C@H]([C2=O])c3ccc(cc3)C)C)4cccc(c(c4)OC)O[C](=O)OC                  |
| ZINC08440033 | 5.01  | -0.72             | -13.61           | 1        | 6           | 0      | 453.922         | 5              | CC1=NC2=C([C@H]([C1C(=O)OC]c3ccc(c(c3)OC)O)C(=O)C[C@@H]([C2]c4ccc(cc4)C                       |
| ZINC08440033 | 5.19  | -0.51             | -14.16           | 1        | 6           | 0      | 453.922         | 5              | C0c1cc(ccc1O)[C@H]2C3C(=NC(=C)C2C(=O)OC)C[C@H]([C3=O])c4ccc(cc4)C                             |
| ZINC08440033 | 5.19  | 0.79              | -26.11           | 1        | 6           | 0      | 453.922         | 5              | C0c1cc(ccc1O)[C@H]2[C@@H]3C(=NC(=C)C2C(=O)OC)C[C@H]([C3=O])c4ccc(cc4)C                        |
| ZINC08440033 | 5.01  | -0.75             | -15.91           | 1        | 6           | 0      | 453.922         | 5              | CC1=C([C@H]([C@H]2C(=N1)C[C@H]([C2=O])c3ccc(cc3)C)C)4cccc(c(c4)OC)O[C](=O)OC                  |
| ZINC08440032 | 4.31  | 1.67              | -15.81           | 0        | 15          | 0      | 576.522         | 8              | C0c1cc(ccc1)C2=NN([C@H]([C2]c3ccc(c3)N+([=O])O-)C(=O)c4ccc(c(c4)N+([=O])O-)N5CCOC5)N+([=O])O- |
| ZINC0702346  | 5.38  | 0.51              | -15.11           | 1        | 4           | 0      | 432.373         | 6              | CC1([C@H]([C@H]1C(=O)Nc2nnc(s2)SCc3cccc3F)C=C(C)C)C                                           |
| ZINC08440031 | 4.31  | 1.63              | -15.47           | 0        | 15          | 0      | 576.522         | 8              | C0c1cc(ccc1)C2=NN([C@H]([C2]c3ccc(c3)N+([=O])O-)C(=O)c4ccc(c(c4)N+([=O])O-)N5CCOC5)N+([=O])O- |
| ZINC08440030 | 5.93  | -0.43             | -11.79           | 0        | 11          | 0      | 659.291         | 6              | c1ccc(cc1)[C@H]2CC(=NN2C(=O)c3ccc(c(c3)N+([=O])O-)N4CCOC4)N+([=O])O-)c5ccc(cc5)Br             |
| ZINC08440029 | 5.93  | -0.41             | -11.77           | 0        | 11          | 0      | 659.291         | 6              | c1ccc(cc1)[C@H]2CC(=NN2C(=O)c3ccc(c(c3)N+([=O])O-)N4CCOC4)N+([=O])O-)c5ccc(cc5)Br             |
| ZINC0702348  | 5.38  | 0.39              | -14.11           | 1        | 4           | 0      | 432.373         | 6              | CC1([C@H]([C@H]1C(=O)Nc2nnc(s2)SCc3cccc3F)C=C(C)C)C                                           |
| ZINC08440028 | 10.75 | 2.82              | -9.1             | 0        | 2           | 0      | 446.723         | 18             | CCCCCCCCCCCCCn1c2ccc2nc1e3ccc3                                                                |
| ZINC08440026 | 9.93  | -0.03             | -10.28           | 1        | 3           | 0      | 428.705         | 20             | CCCCCCCCCCCCCn1c2ccc2nc1CCCO                                                                  |
| ZINC0702344  | 5.33  | -0.01             | -19.05           | 1        | 5           | 0      | 419.959         | 7              | Cc1ccc(cc1)OCC(=O)Nc2nnc(s2)SCc3ccc(cc3)C                                                     |
| ZINC08440023 | 6.39  | -0.88             | -10.37           | 1        | 3           | 0      | 330.516         | 13             | CCCCCCCCCn1c2ccc2nc1CCCO                                                                      |
| ZINC08440022 | 5.38  | -1.12             | -10.48           | 1        | 3           | 0      | 302.462         | 11             | CCCCCCCCCn1c2ccc2nc1CCCO                                                                      |
| ZINC08440021 | 4.37  | -1.36             | -10.51           | 1        | 3           | 0      | 274.408         | 9              | CCCCCCCCCn1c2ccc2nc1CCCO                                                                      |
| ZINC0702343  | 5.7   | 0.29              | -18.24           | 1        | 5           | 0      | 433.986         | 7              | Cc1ccc(cc1)O[C@H]([C](=O)Nc2nnc(s2)SCc3ccc(cc3)C                                              |
| ZINC08440020 | 5.89  | -1                | -10.44           | 1        | 3           | 0      | 316.489         | 12             | CCCCCCCCCn1c2ccc2nc1CCCO                                                                      |
| ZINC08440019 | 7.78  | 0.43              | -14.39           | 1        | 8           | 0      | 662.327         | 5              | c1ccc(cc1)c2c3ccc(ccc3)nH(c(=O)c2c4=NN([C@H]([C4]c5ccc(c5)N+([=O])O-)C(=O)c6ccc(cc6)C)C)Br    |
| ZINC0702342  | 5.7   | 0.35              | -18.46           | 1        | 5           | 0      | 433.986         | 7              | Cc1ccc(cc1)O[C@H]([C](=O)Nc2nnc(s2)SCc3ccc(cc3)C                                              |
| ZINC08440018 | 7.78  | 0.44              | -14.73           | 1        | 8           | 0      | 662.327         | 5              | c1ccc(cc1)c2c3ccc(ccc3)nH(c(=O)c2c4=NN([C@H]([C4]c5ccc(c5)N+([=O])O-)C(=O)c6ccc(cc6)C)C)Br    |
| ZINC08440017 | 3.35  | -3.34             | -17.17           | 1        | 4           | 0      | 425.354         | 3              | c1ccc(cc1)C(=O)NN2C(=O)/C(=C)3ccc3)SC2=S)Br                                                   |
| ZINC08440016 | 7.73  | 1.99              | -14.21           | 0        | 5           | 0      | 508.984         | 5              | C0c1ccc(cc1)C2=NN([C@H]([C2]c3ccc(cc3)F)4nc5ccc(cc5e(n4)e6cccc6)C                             |
| ZINC08440015 | 7.73  | 1.98              | -14.17           | 0        | 5           | 0      | 508.984         | 5              | C0c1ccc(cc1)C2=NN([C@H]([C2]c3ccc(cc3)F)4nc5ccc(cc5e(n4)e6cccc6)C                             |
| ZINC0702340  | 4.57  | -0.63             | -20.22           | 1        | 6           | 0      | 421.931         | 8              | C0c1ccc(cc1)OCC(=O)Nc2nnc(s2)SCc3ccc(cc3)C                                                    |
| ZINC08440014 | 7.85  | -0.06             | -14.58           | 1        | 6           | 0      | 647.356         | 5              | C0c1ccc(cc1)[C@H]2CC(=NN2C(=O)c3ccc(cc3)C)C)4c(c5ccc5nH)c4(=O)Br)c6cccc6                      |
| ZINC08440010 | 6.78  | -1.65             | -13.84           | 1        | 4           | 0      | 466.44          | 5              | Cc1ccc2c(c1)sc(c2)C(=O)Nc3nnc(s3)SCc4ccc(cc4)C                                                |
| ZINC08440009 | 6.2   | 1.99              | -12.01           | 0        | 3           | 0      | 457.73          | 3              | c1ccc(cc1)C(=O)N2[C@H]([C](=O)N2)c3ccc(cc3)Br)c4ccc(cc4)F                                     |
| ZINC08440008 | 6.2   | 1.99              | -11.99           | 0        | 3           | 0      | 457.73          | 3              | c1ccc(cc1)C(=O)N2[C@H]([C](=O)N2)c3ccc(cc3)Br)c4ccc(cc4)F                                     |
| ZINC08440007 | 6.26  | -0.76             | -14.37           | 1        | 4           | 0      | 449.985         | 5              | Cc1ccc2c(c1)sc(c2)C(=O)Nc3nnc(s3)SCc4ccc(cc4)F                                                |
| ZINC13108926 | 5.18  | 11.25             | -42.04           | 0        | 3           | -1     | 410.114         | 2              | c1ccc(ccc1n2nnc2c3ccc(cc3)Br)S-]Br                                                            |
| ZINC00276456 | 3.26  | -4.95             | -9.28            | 0        | 4           | 0      | 316.426         | 3              | Cc1ccc(cc1)N2CCN(CC2)S(=O)(=O)c3ccc3                                                          |
| ZINC08440006 | 5.43  | 0.43              | -12.76           | 1        | 4           | 0      | 432.373         | 6              | CC1([C@H]([C@H]1C(=O)Nc2nnc(s2)SCc3ccc(cc3)F)C=C(C)C)C                                        |
| ZINC08440005 | 4.3   | 1.45              | -15.19           | 0        | 7           | 0      | 443.521         | 6              | Cc1c(c2ccc(ccc2o1)N(C(=O)C)S(=O)=O)c3ccc(cc3)C(C)C(C)C(=O)OC                                  |
| ZINC08440004 | 5.63  | 1.27              | -19.14           | 0        | 7           | 0      | 491.565         | 7              | Cc1ccc(cc1)S(=O)(=O)N(c2ccc3c(c2)c(c3)C)C(=O)OC(C)C(=O)OC4ccc4                                |
| ZINC08440003 | 4.9   | 12.23             | -18.92           | 0        | 8           | 0      | 479.51          | 7              | Cc1ccc(cc1)S(=O)(=O)N(c2ccc3c(c2)c(c3)C)C(=O)OC(C)C(=O)OC4ccc4                                |
| ZINC08440002 | 5.35  | 1.44              | -21.91           | 0        | 7           | 0      | 489.549         | 7              | Cc1ccc(cc1)S(=O)(=O)N(c2ccc3c(c2)c(c3)C)C(=O)OC(C)C(=O)OC4ccc4                                |
| ZINC0702335  | 5.43  | 0.55              | -13.92           | 1        | 4           | 0      | 432.373         | 6              | CC1([C@H]([C@H]1C(=O)Nc2nnc(s2)SCc3ccc(cc3)F)C=C(C)C)C                                        |
| ZINC02061447 | 6.25  | 1.72              | -11.63           | 0        | 6           | 0      | 575.786         | 7              | C0c1cc(ccc1OCc2ccc2C)OC)/C=C\3/C(=O)OC(=N3)c4ccc(cc4)F                                        |
| ZINC02061445 | 6.85  | 4.12              | -10.35           | 0        | 5           | 0      | 524.734         | 6              | C0c1cc(ccc1OCc2ccc2C)OC)/C=C\3/C(=O)OC(=N3)c4ccc(cc4)F                                        |
| ZINC0702334  | 5.43  | 0.55              | -13.93           | 1        | 4           | 0      | 432.373         | 6              | CC1([C@H]([C@H]1C(=O)Nc2nnc(s2)SCc3ccc(cc3)F)C=C(C)C)C                                        |
| ZINC02061443 | 6.15  | 3.04              | -10.11           | 0        | 5           | 0      | 472.299         | 6              | C0c1cc(ccc1OCc2ccc2C)OC)/C=C\3/C(=O)OC(=N3)c4ccc(cc4)F                                        |
| ZINC08440001 | 5.43  | 0.43              | -12.73           | 1        | 4           | 0      | 432.373         | 6              | CC1([C@H]([C@H]1C(=O)Nc2nnc(s2)SCc3ccc(cc3)F)C=C(C)C)C                                        |
| ZINC08440000 | 4.88  | 0.81              | -19.93           | 0        | 10          | 0      | 528.926         | 7              | Cc1c(c2ccc(ccc2o1)N(C(=O)c3ccc(c3)N+([=O])O-)S(=O)(=O)c4ccc(cc4)C)C(=O)OC                     |
| ZINC08439999 | 3.65  | -0.49             | -18.1            | 0        | 8           | 0      | 484.917         | 6              | Cc1c(c2ccc(ccc2o1)N(C(=O)c3ccc(c3)S(=O)(=O)c4ccc(cc4)C)C(=O)OC                                |
| ZINC08439998 | 5.45  | -2.67             | -16.11           | 1        | 5           | 0      | 438.332         | 3              | CC1(Cc2c(c3ccc(ccc3o2)NS(=O)(=O)c4ccc(cc4)C)C(=O)C)C                                          |
| ZINC08439997 | 6.48  | 0.68              | -16.32           | 1        | 5           | 0      | 445.585         | 11             | CCCCCOC1ccc(cc1)C(=O)Nc2nnc(s2)SCc3cccc3F                                                     |





**Supplementary Table S2:**  
**Detailed table of XP Docking using Schrodinger's Glide module**

| ZINC_ID      | sLogP | ApolarDesolvation | PolarDesolvation | H Donors | H Acceptors | Charge | MolecularWeight | RotatableBonds | SMILES                                                                            |
|--------------|-------|-------------------|------------------|----------|-------------|--------|-----------------|----------------|-----------------------------------------------------------------------------------|
| ZINC00480133 | 3.89  | -2.38             | -7.33            | 2        | 4           | 0      | 282.13          | 2              | c1ccc(cc1)NC(=O)Nc2ccc(cc2)Cl                                                     |
| ZINC09089086 | 2.29  | 4.51              | -41.47           | 1        | 5           | -1     | 228.231         | 1              | CcC1c([nH]c2nc3cccc3n2c1=O)[O-]                                                   |
| ZINC09089086 | 2.29  | -1.91             | -32.04           | 3        | 5           | 1      | 230.247         | 1              | CcC1c(=O)nHc2[nH+]c3cccc3n2c1O                                                    |
| ZINC09089086 | 2.75  | 3.44              | -115.83          | 0        | 5           | -2     | 227.223         | 1              | CcC1c(nc2nc3cccc3n2c1O-)[O-]                                                      |
| ZINC18085164 | 5.43  | 13.04             | -19.31           | 2        | 7           | 0      | 445.519         | 4              | Cc1cccc1NC(=O)C2=C(C)C=C(C)C2c3ccc(cc3)N+([=O])C(=O)CC(C3)(C)C                    |
| ZINC18085164 | 5.55  | 14.02             | -21.9            | 1        | 7           | 0      | 445.519         | 4              | Cc1cccc1NC(=O)C@H]2[C@@H]([C@@H]3C(=O)CC(C=C3N=C2C)(C)C4ccc(cc4)N+([=O])O-]       |
| ZINC18085164 | 5.38  | 13.09             | -57.04           | 1        | 7           | 0      | 445.519         | 4              | Cc1cccc1NC(=O)C@H]2[C@@H]([C3=C(C)C(C3=O)(C)C)N=C2C]c4ccc(cc4)N+([=O])O-          |
| ZINC00471779 | 2.3   | 4.66              | -8.62            | 2        | 4           | 0      | 261.712         | 3              | c1ccc(cc1)NC(=O)Nc2cccc2Cl                                                        |
| ZINC06443371 | 7.69  | 18.24             | -13.97           | 1        | 4           | 0      | 519.714         | 7              | Cc1cccc(c1)NC(=O)C@H]([C@@H]([C@@H]2c3ccc(cc3)c4ccc(cc4)C(C)C(C)C#N)C             |
| ZINC08439970 | 5.38  | 2.15              | -44.42           | 2        | 6           | 1      | 479.641         | 12             | CC[NH+](CC)CCCN1[C@@H]([C@H]([C@H]3C(=O)C(C1=O)C(=O)c2ccc(cc2)OCC)c3ccc(cc3)C(C)C |
| ZINC08439970 | 4.79  | 2.06              | -53.24           | 1        | 6           | 1      | 479.641         | 12             | CC[NH+](CC)CCCN1[C@@H]([C@H]([C@H]3C(=O)C(C1=O)C(=O)c2ccc(cc2)OCC)c3ccc(cc3)C(C)C |
| ZINC06443308 | 7.69  | 18.28             | -14.04           | 1        | 4           | 0      | 519.714         | 7              | Cc1cccc(c1)NC(=O)C@H]([C@@H]([C@@H]2c3ccc(cc3)c4ccc(cc4)C(C)C(C)C#N)C             |
| ZINC08439969 | 8.11  | 0.58              | -9.11            | 3        | 4           | 0      | 537.994         | 5              | Cc1ccc(cc1)c2ccc(c3c(c3)N4c4ccc(cc4)C(F)(F)F)N5cccc5                              |
| ZINC08439968 | 6.86  | 1.27              | -16.6            | 1        | 4           | 0      | 469.997         | 6              | Cc1ccc(cc1)c2ccc(c3c(c3)N4c4ccc(cc4)C(F)(F)F)N5cccc5                              |
| ZINC08439967 | 4.71  | 12.15             | -40.76           | 0        | 5           | -1     | 426.492         | 8              | CCCOC1ccc(cc1)C(=O)C2=C(C)C(=O)N(C)C2=O)C3cccc3)C4cccc4]O-                        |
| ZINC08439967 | 5.16  | -0.05             | -26.86           | 1        | 5           | 0      | 427.5           | 7              | CCCOC1ccc(cc1)C(=O)C2=C(C)C(=O)N(C)C2=O)C3cccc3)C4cccc4]O                         |
| ZINC08439967 | 4.13  | 0.2               | -22.44           | 0        | 5           | 0      | 427.5           | 8              | CCCOC1ccc(cc1)C(=O)C2=C(C)C(=O)N(C)C2=O)C3cccc3)C4cccc4]O-                        |
| ZINC06651640 | 4.36  | 1.37              | -28.9            | 3        | 8           | 0      | 501.583         | 6              | Cc1ccc(cc1)NC(=O)COC2ccc(cc2)C@H]3C(=O)C4=C3C(=O)CC(C4)(C)C)N#N                   |
| ZINC06651643 | 4.36  | 1.37              | -28.98           | 3        | 8           | 0      | 501.583         | 6              | Cc1ccc(cc1)NC(=O)COC2ccc(cc2)C@H]3C(=O)C4=C3C(=O)CC(C4)(C)C)N#N                   |
| ZINC08439966 | 4.71  | 12.15             | -40.37           | 0        | 5           | -1     | 426.492         | 8              | CCCOC1ccc(cc1)C(=O)C2=C(C)C(=O)N(C)C2=O)C3cccc3)C4cccc4]O-                        |
| ZINC08439966 | 5.16  | -0.03             | -27.57           | 1        | 5           | 0      | 427.5           | 7              | CCCOC1ccc(cc1)C(=O)C2=C(C)C(=O)N(C)C2=O)C3cccc3)C4cccc4]O                         |
| ZINC08439966 | 4.13  | 0.27              | -21.86           | 0        | 5           | 0      | 427.5           | 8              | CCCOC1ccc(cc1)C(=O)C2=C(C)C(=O)N(C)C2=O)C3cccc3)C4cccc4]O-                        |
| ZINC08439965 | 8.01  | 2.45              | -14.43           | 1        | 5           | 0      | 541.676         | 8              | Cc1ccc(cc1)c2ccc(c3c(c3)N4c4ccc(cc4)C#N)N5cccc5                                   |
| ZINC08439964 | 6.39  | 1.13              | -12.77           | 1        | 4           | 0      | 455.97          | 6              | c1ccc(cc1)c2ccc(c3c(c3)N4c4ccc(cc4)C#N)N5cccc5                                    |
| ZINC0702307  | 3.71  | 8.46              | -42.02           | 1        | 6           | -1     | 428.464         | 7              | CCOC1ccc(cc1)C(=O)C2=C(C)C(=O)N(C)C2=O)C3cccc3)C4cccc4]O-                         |
| ZINC0702307  | 4.15  | -2.1              | -27.39           | 2        | 6           | 0      | 429.472         | 6              | CCOC1ccc(cc1)C(=O)C2=C(C)C(=O)N(C)C2=O)C3cccc3)C4cccc4]O                          |
| ZINC0702307  | 3.12  | -1.85             | -23.76           | 1        | 6           | 0      | 429.472         | 7              | CCOC1ccc(cc1)C(=O)C2=C(C)C(=O)N(C)C2=O)C3cccc3)C4cccc4]O                          |
| ZINC08439963 | 5.94  | -0.28             | -15.62           | 1        | 6           | 0      | 462.571         | 9              | CCOC1ccc(cc1)C(=O)C2=C(C)C(=O)N(C)C2=O)C3cccc3)C4cccc4]O                          |
| ZINC06651633 | 4.37  | 8.45              | -25.57           | 1        | 8           | 0      | 447.491         | 9              | CCOC1ccc(cc1)C(=O)C2=C(C)C(=O)N(C)C2=O)C3cccc3)C4cccc4]O                          |
| ZINC0702308  | 3.71  | 8.49              | -41.66           | 1        | 6           | -1     | 428.464         | 7              | CCOC1ccc(cc1)C(=O)C2=C(C)C(=O)N(C)C2=O)C3cccc3)C4cccc4]O-                         |
| ZINC0702308  | 4.15  | -2.1              | -28.07           | 2        | 6           | 0      | 429.472         | 6              | CCOC1ccc(cc1)C(=O)C2=C(C)C(=O)N(C)C2=O)C3cccc3)C4cccc4]O                          |
| ZINC0702308  | 3.12  | -1.86             | -21.41           | 1        | 6           | 0      | 429.472         | 7              | CCOC1ccc(cc1)C(=O)C2=C(C)C(=O)N(C)C2=O)C3cccc3)C4cccc4]O                          |
| ZINC02061364 | 7.19  | -0.37             | -13.3            | 1        | 5           | 0      | 442.902         | 4              | Cc1ccc(cc1)c2ccc(c3c(c3)N4c4ccc(cc4)N5cccc5)C                                     |
| ZINC02061363 | 7.04  | -0.71             | -11.75           | 1        | 4           | 0      | 430.916         | 4              | c1ccc(cc1)c2ccc(c3c(c3)N4c4ccc(cc4)N5cccc5)C                                      |
| ZINC02061362 | 7.18  | -1.78             | -9.15            | 1        | 5           | 0      | 493.744         | 4              | c1ccc(cc1)c2ccc(c3c(c3)N4c4ccc(cc4)N5cccc5)C                                      |
| ZINC02061361 | 6.36  | 1.25              | -8.16            | 0        | 4           | 0      | 468.734         | 5              | c1ccc(cc1)COC2ccc(c2)/C=C3/C(=O)OC(=N3)4ccc(cc4)Br                                |
| ZINC02061359 | 6.13  | 2.84              | -11.83           | 0        | 7           | 0      | 469.28          | 6              | c1ccc(cc1)COC2ccc(c2)/C=C3/C(=O)OC(=N3)4ccc(cc4)N+([=O])O-]Cl                     |
| ZINC02061357 | 5.89  | 3.03              | -15.48           | 0        | 8           | 0      | 492.915         | 8              | CCOC1ccc(cc1)C(=O)C2=C(C)C(=O)N(C)C2=O)C3cccc3)C4cccc4]O                          |
| ZINC02061355 | 6.32  | 2.24              | -11.54           | 0        | 5           | 0      | 512.787         | 7              | CCOC1ccc(cc1)C(=O)C2=C(C)C(=O)N(C)C2=O)C3cccc3)C4cccc4]O                          |
| ZINC06651619 | 5.57  | 1.97              | -8.55            | 0        | 4           | 0      | 445.256         | 5              | CC(=O)COC1ccc(c1)/C=C2/C(=O)OC(=N2)3ccc(cc3)                                      |
| ZINC06651610 | 5.6   | 1.97              | -8.17            | 0        | 4           | 0      | 445.256         | 5              | CC(=O)COC1ccc(c1)/C=C2/C(=O)OC(=N2)3ccc(cc3)                                      |
| ZINC06651607 | 5.23  | 2.26              | -9.92            | 0        | 5           | 0      | 475.282         | 6              | CC(=O)COC1ccc(c1)C(=O)C2=C(C)C(=O)OC(=N2)3ccc(cc3)                                |
| ZINC02061341 | 5.61  | 2.27              | -9.71            | 0        | 5           | 0      | 489.309         | 7              | CCOC1ccc(cc1)C(=O)C2=C(C)C(=O)OC(=N2)3ccc(cc3)                                    |
| ZINC08439961 | 7.3   | 1.5               | -15.4            | 1        | 6           | 0      | 567.736         | 9              | CCOC(=O)c1c2c(sc1)Nc3c(c3)N4c4ccc(cc4)C5cccc5)C#N)CCCC2                           |
| ZINC08439960 | 7.09  | 2.06              | -15.82           | 1        | 5           | 0      | 493.632         | 7              | Cc1ccc(cc1)c2ccc(c3c(c3)N4c4ccc(cc4)C#N)N5cccc5)C                                 |
| ZINC08439959 | 6.33  | -0.85             | -12.51           | 3        | 6           | 0      | 479.561         | 6              | COc(=O)c1ccc(cc1)NC(=O)c2c(c3c(cc3)N4c4ccc(cc4)C5cccc5)N                          |
| ZINC08439958 | 6.16  | 1.65              | -14.99           | 1        | 4           | 0      | 435.552         | 6              | Cc1cccc1NC(=O)CSc2c(c3c(cc3)N4c4ccc(cc4)C#N                                       |
| ZINC02061330 | 6.08  | -1.34             | -12.55           | 1        | 7           | 0      | 525.399         | 9              | CCOC1ccc(cc1)C(=O)C2=C(C)C(=O)N(C)C2=O)C3cccc3)C4cccc4]Br                         |
| ZINC02061329 | 5.87  | 2.12              | -8.27            | 0        | 4           | 0      | 452.279         | 5              | c1ccc(cc1)COC2ccc(c2)/C=C3/C(=O)OC(=N3)4ccc(cc4)F                                 |
| ZINC08439957 | 6.71  | 1.71              | -9.77            | 0        | 5           | 0      | 608.201         | 6              | COc1ccc(cc1)C(=O)C2=C(C)C(=O)N(C)C2=O)C3cccc3)C4cccc4]F                           |
| ZINC06651597 | 5.29  | 3.03              | -11.38           | 0        | 5           | 0      | 442.309         | 7              | CCOC1ccc(cc1)C(=O)C2=C(C)C(=O)OC(=N2)3ccc(cc3)Br                                  |
| ZINC08439956 | 7.72  | 0.64              | -15.93           | 0        | 5           | 0      | 535.445         | 5              | COc1ccc(cc1)C2=NN([C@@H]([C@H]2)3ccc(cc3)Br)4n5cccc5)C4)C6cccc6                   |
| ZINC08439955 | 7.72  | 0.63              | -15.9            | 0        | 5           | 0      | 535.445         | 5              | COc1ccc(cc1)C2=NN([C@@H]([C@H]2)3ccc(cc3)Br)4n5cccc5)C4)C6cccc6                   |
| ZINC08439954 | 9.12  | -0.29             | -11.86           | 0        | 4           | 0      | 618.76          | 4              | c1ccc(cc1)c2c3ccc(cc3)N4[C@@H]([C@H]([C@H]2)3ccc(cc3)Br)4n5cccc5)C4)C6cccc6       |
| ZINC08439953 | 9.12  | -0.3              | -11.72           | 0        | 4           | 0      | 618.76          | 4              | c1ccc(cc1)c2c3ccc(cc3)N4[C@@H]([C@H]([C@H]2)3ccc(cc3)Br)4n5cccc5)C4)C6cccc6       |
| ZINC02061324 | 7.8   | -3.79             | -8.53            | 0        | 4           | 0      | 514.254         | 3              | c1ccc(cc1)c2c3ccc(cc3)N4[C@@H]([C@H]([C@H]2)3ccc(cc3)Br)4n5cccc5)C4)C6cccc6       |
| ZINC02282159 | 7.25  | -1.19             | -14.75           | 2        | 6           | 0      | 525.406         | 6              | COc1ccc(cc1)NC(=O)c2ccc(cc2)Nc3nc4ccc(cc4)n3)5cccc5]Br                            |
| ZINC02061320 | 7.72  | -0.85             | -13.31           | 2        | 5           | 0      | 485.374         | 5              | c1ccc(cc1)c2c3ccc(cc3)N4[C@@H]([C@H]([C@H]2)3ccc(cc3)Br)4n5cccc5)C4)C6cccc6       |
| ZINC02811564 | 7.12  | -0.58             | -14.81           | 2        | 6           | 0      | 480.955         | 6              | COc1ccc(cc1)NC(=O)c2ccc(cc2)Nc3nc4ccc(cc4)n3)5cccc5]Cl                            |
| ZINC06443234 | 7.29  | -3.63             | -8.76            | 2        | 3           | 0      | 596.25          | 5              | Cc1ccc(cc1)C]N[C@@H]([C@H]([C@H]2c3ccc(cc3)C4c2ccc(cc4)N)O                        |
| ZINC06443231 | 7.29  | -3.57             | -8.68            | 2        | 3           | 0      | 596.25          | 5              | Cc1ccc(cc1)C]N[C@@H]([C@H]([C@H]2c3ccc(cc3)C4c2ccc(cc4)N)O                        |

Supplementary Table S2:

Detailed table of XP Docking using Schrodinger's Glide module

| ZINC_ID      | xLogP | ApolarDesolvation | PolarDesolvation | H Donors | H Acceptors | Charge | MolecularWeight | RotatableBonds | SMILES                                                                   |
|--------------|-------|-------------------|------------------|----------|-------------|--------|-----------------|----------------|--------------------------------------------------------------------------|
| ZINC02061318 | 6.05  | 1.96              | -14.29           | 1        | 3           | 0      | 441.275         | 4              | c1ccc(cc1)[C@@H]2C=C(C(=O)N2c3ccc(cc3)F)Nc4ccc(cc4)F)Br                  |
| ZINC02061319 | 6.05  | 1.97              | -13.74           | 1        | 3           | 0      | 441.275         | 4              | c1ccc(cc1)[C@@H]2C=C(C(=O)N2c3ccc(cc3)F)Nc4ccc(cc4)F)Br                  |
| ZINC02061316 | 5.97  | 13.11             | -8.16            | 0        | 6           | 0      | 440.286         | 4              | c1ccc(cc1)[C@@H]2C/C(=N/c3ccc(cc3)Cl)/C(=O)N2c4ccc(cc4)Cl][N+](=O)[O-]   |
| ZINC02061317 | 5.97  | 13.06             | -7.97            | 0        | 6           | 0      | 440.286         | 4              | c1ccc(cc1)[C@@H]2C/C(=N/c3ccc(cc3)Cl)/C(=O)N2c4ccc(cc4)Cl][N+](=O)[O-]   |
| ZINC02061314 | 6     | 13.43             | -12.3            | 0        | 6           | 0      | 440.286         | 4              | c1ccc(cc1)[N+](=O)[O-][C@@H]2C/C(=N/c3ccc(cc3)Cl)/C(=O)N2c4ccc(cc4)Cl    |
| ZINC02061315 | 6     | 13.43             | -12.18           | 0        | 6           | 0      | 440.286         | 4              | c1ccc(cc1)[N+](=O)[O-][C@@H]2C/C(=N/c3ccc(cc3)Cl)/C(=O)N2c4ccc(cc4)Cl    |
| ZINC02061312 | 6.02  | 13.43             | -16.84           | 0        | 6           | 0      | 440.286         | 4              | c1ccc(cc1)[C@@H]2C/C(=N/c3ccc(cc3)Cl)/C(=O)N2c4ccc(cc4)Cl][N+](=O)[O-]   |
| ZINC02061313 | 6.02  | 13.43             | -16.93           | 0        | 6           | 0      | 440.286         | 4              | c1ccc(cc1)[C@@H]2C/C(=N/c3ccc(cc3)Cl)/C(=O)N2c4ccc(cc4)Cl][N+](=O)[O-]   |
| ZINC02061308 | 6.95  | 0.8               | -13.06           | 1        | 3           | 0      | 429.734         | 4              | c1ccc(cc1)[C@@H]2C=C(C(=O)N2c3ccc(cc3)Cl)Nc4ccc(cc4)Cl                   |
| ZINC02061309 | 6.95  | 0.82              | -12.56           | 1        | 3           | 0      | 429.734         | 4              | c1ccc(cc1)[C@@H]2C=C(C(=O)N2c3ccc(cc3)Cl)Nc4ccc(cc4)Cl                   |
| ZINC02061306 | 7.08  | 0.18              | -12.98           | 1        | 3           | 0      | 474.185         | 4              | c1ccc(cc1)[C@@H]2C=C(C(=O)N2c3ccc(cc3)Cl)Nc4ccc(cc4)Cl)Br                |
| ZINC02061307 | 7.08  | 0.2               | -12.52           | 1        | 3           | 0      | 474.185         | 4              | c1ccc(cc1)[C@@H]2C=C(C(=O)N2c3ccc(cc3)Cl)Nc4ccc(cc4)Cl)Br                |
| ZINC00843897 | 5.22  | 11.93             | -14.9            | 1        | 6           | 0      | 479.458         | 6              | C0c1ccc(cc1OC)[C@@H]2c3c(n[nH]c3C(=O)N2c4ccc(cc4)C(F)F)c5ccc(cc5)C(F)F   |
| ZINC00843898 | 5.22  | 11.45             | -13              | 1        | 6           | 0      | 479.458         | 6              | C0c1ccc(cc1OC)[C@@H]2c3c(n[nH]c3C(=O)N2c4ccc(cc4)C(F)F)c5ccc(cc5)C(F)F   |
| ZINC00651584 | 5.69  | 12.77             | -17.17           | 1        | 4           | 0      | 437.396         | 4              | c1ccc(cc1)c2c3c([nH]n2)C(=O)N([C@@H]3c4ccc(cc4)F)c5ccc(cc5)C(F)F         |
| ZINC00843893 | 6.26  | 13.25             | -13.01           | 1        | 4           | 0      | 453.851         | 4              | c1ccc(cc1)c2c3c([nH]n2)C(=O)N([C@@H]3c4ccc(cc4)F)c5ccc(cc5)C(F)F         |
| ZINC00843894 | 6.26  | 12.88             | -11.96           | 1        | 4           | 0      | 453.851         | 4              | c1ccc(cc1)c2c3c([nH]n2)C(=O)N([C@@H]3c4ccc(cc4)F)c5ccc(cc5)C(F)F         |
| ZINC06446775 | 6.39  | 13.35             | -12.84           | 1        | 4           | 0      | 498.302         | 4              | c1ccc(cc1)c2c3c([nH]n2)C(=O)N([C@@H]3c4ccc(cc4)Br)c5ccc(cc5)C(F)F        |
| ZINC06446774 | 6.39  | 12.98             | -11.88           | 1        | 4           | 0      | 498.302         | 4              | c1ccc(cc1)c2c3c([nH]n2)C(=O)N([C@@H]3c4ccc(cc4)Br)c5ccc(cc5)C(F)F        |
| ZINC00843889 | 5.58  | 12.73             | -12.71           | 1        | 4           | 0      | 419.406         | 4              | c1ccc(cc1)c2c3c([nH]n2)C(=O)N([C@@H]3c4ccc(cc4)F)c5ccc(cc5)C(F)F         |
| ZINC00843890 | 5.58  | 12.36             | -12.1            | 1        | 4           | 0      | 419.406         | 4              | c1ccc(cc1)c2c3c([nH]n2)C(=O)N([C@@H]3c4ccc(cc4)F)c5ccc(cc5)C(F)F         |
| ZINC08439949 | 5.76  | 10.93             | -11.66           | 1        | 5           | 0      | 532.312         | 6              | C0c1ccc(cc1)[C@@H]2C=C(C(=O)N2c3ccc(cc3)C(F)F)O[C(=O)e4ccc(cc4)Br        |
| ZINC08439949 | 5.18  | 11.67             | -16.25           | 0        | 5           | 0      | 532.312         | 6              | C0c1ccc(cc1)[C@@H]2C=C(C(=O)N2c3ccc(cc3)C(F)F)O[C(=O)e4ccc(cc4)Br        |
| ZINC08439948 | 5.76  | 10.95             | -11.71           | 1        | 5           | 0      | 532.312         | 6              | C0c1ccc(cc1)[C@@H]2C=C(C(=O)N2c3ccc(cc3)C(F)F)O[C(=O)e4ccc(cc4)Br        |
| ZINC08439948 | 5.18  | 11.69             | -16.22           | 0        | 5           | 0      | 532.312         | 6              | C0c1ccc(cc1)[C@@H]2C=C(C(=O)N2c3ccc(cc3)C(F)F)O[C(=O)e4ccc(cc4)Br        |
| ZINC08439947 | 6.39  | 11.66             | -10.57           | 1        | 4           | 0      | 536.731         | 5              | c1ccc(cc1)[C@@H]2C=C(C(=O)N2c3ccc(cc3)C(F)F)O[C(=O)e4ccc(cc4)Br]Cl       |
| ZINC08439947 | 5.8   | 12.35             | -16.18           | 0        | 4           | 0      | 536.731         | 5              | c1ccc(cc1)[C@@H]2C=C(C(=O)N2c3ccc(cc3)C(F)F)O[C(=O)e4ccc(cc4)Br]Cl       |
| ZINC08439946 | 6.39  | 12.02             | -9.45            | 1        | 4           | 0      | 536.731         | 5              | c1ccc(cc1)[C@@H]2C=C(C(=O)N2c3ccc(cc3)C(F)F)O[C(=O)e4ccc(cc4)Br]Cl       |
| ZINC08439946 | 5.8   | 12.76             | -12.27           | 0        | 4           | 0      | 536.731         | 5              | c1ccc(cc1)[C@@H]2C=C(C(=O)N2c3ccc(cc3)C(F)F)O[C(=O)e4ccc(cc4)Br]Cl       |
| ZINC00843877 | 5.47  | 13.04             | -14.31           | 1        | 7           | 0      | 475.302         | 4              | c1ccc(cc1)N2[C@@H](c3c(n[nH]c3C2=O)e4ccc(cc4)Br)c5ccc(cc5)N+](=O)[O-]    |
| ZINC00843878 | 5.47  | 12.68             | -12.46           | 1        | 7           | 0      | 475.302         | 4              | c1ccc(cc1)N2[C@@H](c3c(n[nH]c3C2=O)e4ccc(cc4)Br)c5ccc(cc5)N+](=O)[O-]    |
| ZINC06446668 | 6.33  | 12.94             | -9.97            | 1        | 4           | 0      | 509.201         | 3              | c1ccc(cc1)N2[C@@H](c3c(n[nH]c3C2=O)e4ccc(cc4)Br)c5ccc(cc5)Br             |
| ZINC06446667 | 6.33  | 12.59             | -8.74            | 1        | 4           | 0      | 509.201         | 3              | c1ccc(cc1)N2[C@@H](c3c(n[nH]c3C2=O)e4ccc(cc4)Br)c5ccc(cc5)Br             |
| ZINC06406341 | 5.45  | 11.54             | -61.42           | 0        | 5           | -1     | 466.435         | 6              | Cc1ccc(cc1)C(=O)C2=C(C(=O)N)C([C@@H]2c3ccc(cc3)OC)C4=C(F)F)F)O-          |
| ZINC06406755 | 5.45  | 11.62             | -61.01           | 0        | 5           | -1     | 466.435         | 6              | Cc1ccc(cc1)C(=O)C2=C(C(=O)N)C([C@@H]2c3ccc(cc3)OC)C4=C(F)F)F)O-          |
| ZINC08439934 | 4.06  | 4.86              | -70.18           | 1        | 13          | 1      | 428.337         | 4              | [C]NH+1CCGG1-C2c3cc(ccc3-c4c2cc(cc4N+)=O)[O-][N+](=O)[O-][N+](=O)[O-]    |
| ZINC08439933 | 6.76  | -4.3              | -57.51           | 2        | 4           | 1      | 578.756         | 5              | c1ccc(cc1)N2C([NH+])(CC2)C([C@@H](Cn3c4ccc(cc4c5ccc(cc5)Br)Br)O)Cl       |
| ZINC08439932 | 6.76  | -4.34             | -57.65           | 2        | 4           | 1      | 578.756         | 5              | c1ccc(cc1)N2C([NH+])(CC2)C([C@@H](Cn3c4ccc(cc4c5ccc(cc5)Br)Br)O)Cl       |
| ZINC00843796 | 3.88  | 1.35              | -16.27           | 1        | 4           | 0      | 427.22          | 4              | c1ccc(cc1)N(C(=O)[C@@H]2CC(=O)N(C2)c3ccc(cc3)Br)C(F)F                    |
| ZINC00843797 | 3.88  | 1.35              | -20.49           | 1        | 4           | 0      | 427.22          | 4              | c1ccc(cc1)N(C(=O)[C@@H]2CC(=O)N(C2)c3ccc(cc3)Br)C(F)F                    |
| ZINC08439931 | 5.27  | 0.4               | -17.32           | 0        | 7           | 0      | 497.956         | 7              | CCOC(=O)c1c(oc2c1cc(cc2)N(C(=O)c3ccc(cc3)Cl)S(=O)(=O)e4ccc(cc4)C         |
| ZINC08439930 | 5.32  | 0.51              | -18.38           | 0        | 7           | 0      | 497.956         | 7              | CCOC(=O)c1c(oc2c1cc(cc2)N(C(=O)c3ccc(cc3)Cl)S(=O)(=O)e4ccc(cc4)C         |
| ZINC02484263 | 4.37  | 0.71              | -14.81           | 0        | 6           | 0      | 427.522         | 5              | Cc1c(c2cc(ccc2o1)N(C(=O)C)S(=O)(=O)c3ccc(cc3)C(C)C)C(=O)C                |
| ZINC08439929 | 5.88  | 1.01              | -19.9            | 0        | 6           | 0      | 487.577         | 7              | Cc1ccc(cc1)S(=O)(=O)N(c2ccc3c(c2)c(c(o3)C)C(=O)C)C(=O)C/C=C/c4ccc(cc4)C  |
| ZINC08439928 | 5.43  | 1.06              | -15.95           | 0        | 7           | 0      | 477.538         | 7              | Cc1ccc(cc1)S(=O)(=O)N(c2ccc3c(c2)c(c(o3)C)C(=O)C)C(=O)C/c4ccc(cc4)C      |
| ZINC08439927 | 5.92  | 0.26              | -16.83           | 0        | 6           | 0      | 495.984         | 6              | Cc1ccc(cc1)S(=O)(=O)N(c2ccc3c(c2)c(c(o3)C)C(=O)C)C(=O)C/c4ccc(cc4)Cl     |
| ZINC08439926 | 5.65  | 0.38              | -18.02           | 0        | 6           | 0      | 493.968         | 6              | Cc1c(c2cc(ccc2o1)N(C(=O)C)/C=C/c3ccc(cc3)S(=O)(=O)e4ccc(cc4)Cl)C(=O)C    |
| ZINC02061254 | 4.78  | 0.18              | -17.25           | 0        | 6           | 0      | 447.512         | 5              | Cc1ccc(cc1)S(=O)(=O)N(c2ccc3c(c2)c(c(o3)C)C(=O)C)C(=O)C/c4ccc(cc4)C      |
| ZINC08439925 | 4.96  | -0.15             | -20.47           | 0        | 6           | 0      | 467.93          | 5              | Cc1c(c2cc(ccc2o1)N(C(=O)C)/C=C/c3ccc(cc3)S(=O)(=O)e4ccc(cc4)Cl)C(=O)C    |
| ZINC08439924 | 5.01  | -0.22             | -17.69           | 0        | 6           | 0      | 467.93          | 5              | Cc1c(c2cc(ccc2o1)N(C(=O)C)/C=C/c3ccc(cc3)S(=O)(=O)e4ccc(cc4)Cl)C(=O)C    |
| ZINC08439923 | 4.33  | 10.23             | -19.4            | 0        | 6           | 0      | 433.485         | 5              | Cc1c(c2cc(ccc2o1)N(C(=O)C)/C=C/c3ccc(cc3)S(=O)(=O)e4ccc(cc4)Cl)C(=O)C    |
| ZINC08439922 | 7.83  | 1.35              | -14.64           | 0        | 4           | 0      | 523.409         | 4              | c1ccc(cc1)c2c3ccc(cc3)nc(n2)N4[C@@H](CC(=N4)c5ccc(cc5)Br)c6ccc(cc6)F     |
| ZINC08439921 | 7.83  | 1.35              | -14.59           | 0        | 4           | 0      | 523.409         | 4              | c1ccc(cc1)c2c3ccc(cc3)nc(n2)N4[C@@H](CC(=N4)c5ccc(cc5)Br)c6ccc(cc6)F     |
| ZINC08439920 | 4.03  | -0.43             | -17.47           | 0        | 8           | 0      | 498.944         | 7              | CCOC(=O)c1c(oc2c1cc(cc2)N(C(=O)c3ccc(cc3)S(=O)(=O)e4ccc(cc4)Cl)C         |
| ZINC08439919 | 5.7   | 0.71              | -19.12           | 0        | 7           | 0      | 499.544         | 6              | Cc1c(c2cc(ccc2o1)N(C(=O)C)/C=C/c3ccc(cc3)S(=O)(=O)e4ccc(cc4)Cl)C(=O)C    |
| ZINC08439918 | 5.51  | -0.01             | -18              | 0        | 6           | 0      | 483.545         | 5              | Cc1c(c2cc(ccc2o1)N(C(=O)C)/C=C/c3ccc(cc3)S(=O)(=O)e4ccc(cc4)Cl)C         |
| ZINC02061239 | 6.29  | -1.85             | -5.01            | 0        | 3           | 0      | 355.301         | 8              | CCCCCSc1nnc(o1)c2ccc(cc2)Br                                              |
| ZINC02061238 | 6.22  | -2.54             | -6.01            | 0        | 3           | 0      | 416.127         | 4              | c1ccc(cc1)c2nnc(o2)Sc3ccc(cc3)Cl)Br                                      |
| ZINC08439917 | 5.62  | -1.11             | -8.16            | 0        | 6           | 0      | 456.321         | 3              | c1ccc(cc1)[N+](=O)[O-][C@@H]2N3[C@@H](CC(=N3)c4ccc(cc4)C)C5ccc(cc5)O2)Br |
| ZINC08439916 | 5.62  | -0.65             | -10.13           | 0        | 6           | 0      | 456.321         | 3              | c1ccc(cc1)[N+](=O)[O-][C@@H]2N3[C@@H](CC(=N3)c4ccc(cc4)C)C5ccc(cc5)O2)Br |
| ZINC08439915 | 6.97  | -1.93             | -5.01            | 0        | 3           | 0      | 480.214         | 2              | c1ccc(cc1)C2=NN3C[C@@H](C2)c4ccc(cc4)C[C@@H]3c5ccc(cc5)Cl)Cl)Br          |

Supplementary Table S2:

Detailed table of XP Docking using Schrodinger's Glide module

| ZINC_ID      | xLogP | ApolarDesolvation | PolarDesolvation | H Donors | H Acceptors | Charge | MolecularWeight | RotatableBonds | SMILES                                                                           |
|--------------|-------|-------------------|------------------|----------|-------------|--------|-----------------|----------------|----------------------------------------------------------------------------------|
| ZINC08439914 | 6.97  | -0.66             | -4.86            | 0        | 3           | 0      | 480.214         | 2              | c1ccc(sc1)C2=NN3C@H(C2)c4ccc(ccc4O)C@H3c5ccc(cc5)C1)Br                           |
| ZINC08439913 | 6.49  | -2.38             | -6.17            | 0        | 3           | 0      | 490.22          | 2              | c1ccc(sc1)C2=NN3C@H(C2)c4ccc(ccc4O)C@H3c5ccc(cc5)Br)Br                           |
| ZINC08439912 | 6.49  | -1.93             | -4.83            | 0        | 3           | 0      | 490.22          | 2              | c1ccc(sc1)C2=NN3C@H(C2)c4ccc(ccc4O)C@H3c5ccc(cc5)Br)Br                           |
| ZINC08439911 | 6.36  | -1.77             | -6.23            | 0        | 3           | 0      | 445.769         | 2              | c1ccc(sc1)C2=NN3C@H(C2)c4ccc(ccc4O)C@H3c5ccc(cc5)Cl)Br                           |
| ZINC08439910 | 6.36  | -1.32             | -4.9             | 0        | 3           | 0      | 445.769         | 2              | c1ccc(sc1)C2=NN3C@H(C2)c4ccc(ccc4O)C@H3c5ccc(cc5)Cl)Br                           |
| ZINC08439909 | 6.05  | -2.2              | -9.26            | 0        | 4           | 0      | 518.23          | 3              | c1ccc(sc1)C2=NN3C@H(C2)c4ccc(ccc4O)C@H3C(=O)c5ccc(cc5)Br)Br                      |
| ZINC08439908 | 6.05  | -1.91             | -7.94            | 0        | 4           | 0      | 518.23          | 3              | c1ccc(sc1)C2=NN3C@H(C2)c4ccc(ccc4O)C@H3C(=O)c5ccc(cc5)Br)Br                      |
| ZINC08439907 | 6.28  | -3.66             | -8.51            | 1        | 4           | 0      | 461.768         | 2              | c1ccc(sc1)C2=NN3C@H(C2)c4ccc(ccc4O)C@H3c5ccc(cc5)Br)Cl                           |
| ZINC08439906 | 6.28  | -2.32             | -6.04            | 1        | 4           | 0      | 461.768         | 2              | c1ccc(sc1)C2=NN3C@H(C2)c4ccc(ccc4O)C@H3c5ccc(cc5)Br)Cl                           |
| ZINC08439904 | 5.84  | 0.65              | -11.75           | 0        | 5           | 0      | 434.561         | 10             | Cc1ccc(cc1)OCCSc2nc3cccnc3n2CCOc4ccc4C                                           |
| ZINC08310925 | 6.6   | 14.31             | -10.08           | 0        | 4           | 0      | 418.562         | 9              | Cc1ccc(cc1)OCCSc2nc3cccnc3n2CCOc4ccc4C                                           |
| ZINC08439901 | 6.18  | 2.58              | -16.82           | 2        | 13          | 0      | 503.427         | 7              | Cc1ccc(cc1)N=C(2)/c3ccc(cc3C(=O)C)O]N+([=O])O-]Nc4ccc(cc4N+([=O])O-])N+([=O])O-  |
| ZINC08439898 | 5.01  | 10.76             | -89.44           | 0        | 6           | -2     | 442.6           | 13             | CCC/C(=N)CCCCC/N=C/C(C1=C(CCC1=O))O-]/CCC/C2=C(CCCC2=O))O-                       |
| ZINC08439898 | 5.01  | 10.38             | -89.95           | 0        | 6           | -2     | 442.6           | 13             | CCC/C(=N)CCCCC/N=C/C(C1=C(CCC1=O))O-]/CCC/C2=C(CCCC2=O))O-                       |
| ZINC08439898 | 4.47  | 11.08             | -46.62           | 1        | 6           | -1     | 443.608         | 13             | CCC/C(=N)CCCCC/N=C/C(C1=C(CCC1=O))O-]/CCC/C2=C(CCCC2=O))O-                       |
| ZINC08439898 | 4.47  | 11.07             | -43.87           | 1        | 6           | -1     | 443.608         | 13             | CCC/C(=N)CCCCC/N=C/C(C1=C(CCC1=O))O-]/CCC/C2=C(CCCC2=O))O-                       |
| ZINC13286748 | 2.57  | 7.04              | -15.85           | 1        | 4           | 0      | 288.13          | 6              | COC(=O)CN/C=C(C(=O)O)C1ccc(c1)Cl                                                 |
| ZINC13286748 | 2.57  | 6.62              | -10.31           | 1        | 4           | 0      | 288.13          | 6              | COC(=O)CN/C=C(C(=O)O)C1ccc(c1)Cl                                                 |
| ZINC13286748 | 2.57  | 7.24              | -51.69           | 2        | 4           | 1      | 289.138         | 6              | COC(=O)CN/C=C(C(=O)O)C1ccc(c1)Cl                                                 |
| ZINC00721236 | 4.95  | 1.87              | -13.81           | 1        | 5           | 0      | 425.484         | 6              | Cc1ccc(cc1)N2[C@H](C=C(C2=O)O)C(=O)/C=C/c3cccnc3c4ccc(cc4)OC                     |
| ZINC00721236 | 4.95  | 1.84              | -22.04           | 1        | 5           | 0      | 425.484         | 6              | Cc1ccc(cc1)N2[C@H](C=C(C2=O)O)C(=O)/C=C/c3cccnc3c4ccc(cc4)OC                     |
| ZINC00721236 | 4.37  | 1.66              | -22.26           | 0        | 5           | 0      | 425.484         | 6              | Cc1ccc(cc1)N2[C@H](C=C(C2=O)O)C(=O)/C=C/c3cccnc3c4ccc(cc4)OC                     |
| ZINC00721238 | 4.95  | 1.85              | -13.87           | 1        | 5           | 0      | 425.484         | 6              | Cc1ccc(cc1)N2[C@H](C=C(C2=O)O)C(=O)/C=C/c3cccnc3c4ccc(cc4)OC                     |
| ZINC00721238 | 4.95  | 1.82              | -22.05           | 1        | 5           | 0      | 425.484         | 6              | Cc1ccc(cc1)N2[C@H](C=C(C2=O)O)C(=O)/C=C/c3cccnc3c4ccc(cc4)OC                     |
| ZINC00721238 | 4.37  | 1.63              | -22.26           | 0        | 5           | 0      | 425.484         | 6              | Cc1ccc(cc1)N2[C@H](C=C(C2=O)O)C(=O)/C=C/c3cccnc3c4ccc(cc4)OC                     |
| ZINC09109830 | 4.09  | 10.08             | -59.68           | 1        | 6           | -1     | 463.872         | 5              | CC(=O)Nc1ccc(cc1)N2[C@H](C=C(C2=O)O)C(=O)c3ccc(cc3)C4c4ccc4F                     |
| ZINC09109830 | 3.5   | 0.45              | -15.78           | 1        | 6           | 0      | 464.888         | 5              | CC(=O)Nc1ccc(cc1)N2[C@H](C=C(C2=O)O)C(=O)c3ccc(cc3)C4c4ccc4F                     |
| ZINC09109829 | 4.09  | 10.08             | -59.34           | 1        | 6           | -1     | 463.872         | 5              | CC(=O)Nc1ccc(cc1)N2[C@H](C=C(C2=O)O)C(=O)c3ccc(cc3)C4c4ccc4F                     |
| ZINC09109829 | 3.5   | 0.19              | -16.24           | 1        | 6           | 0      | 464.888         | 5              | CC(=O)Nc1ccc(cc1)N2[C@H](C=C(C2=O)O)C(=O)c3ccc(cc3)C4c4ccc4F                     |
| ZINC09041905 | 3.4   | 1.01              | -59.66           | 1        | 6           | -1     | 416.812         | 6              | c1ccc(cc1)[C@H]2/C=C(C(=O)c3ccc(cc3)Cl)O)/C(=O)C(=O)N2CCCC(=O)O-]F               |
| ZINC09041905 | 2.38  | 0.71              | -53.23           | 0        | 6           | -1     | 416.812         | 7              | c1ccc(cc1)[C@H]2/C=C(C(=O)c3ccc(cc3)Cl)O)/C(=O)C(=O)N2CCCC(=O)O-]F               |
| ZINC09122892 | 3.41  | 8.27              | -60.91           | 1        | 6           | -1     | 416.812         | 6              | c1ccc(cc1)[C@H]2/C=C(C(=O)c3ccc(cc3)Cl)O)/C(=O)C(=O)N2CCCC(=O)O-]F               |
| ZINC09008533 | 3.45  | 0.81              | -59.73           | 1        | 6           | -1     | 416.812         | 6              | c1ccc(cc1)[C@H]2/C=C(C(=O)c3ccc(cc3)Cl)O)/C(=O)C(=O)N2CCCC(=O)O-]F               |
| ZINC09072303 | 3.45  | 9.29              | -59.87           | 1        | 6           | -1     | 416.812         | 6              | c1ccc(cc1)[C@H]2/C=C(C(=O)c3ccc(cc3)Cl)O)/C(=O)C(=O)N2CCCC(=O)O-]F               |
| ZINC00721191 | 5.94  | 0.06              | -9.37            | 0        | 3           | 0      | 437.362         | 6              | c1ccc(cc1)Cn2c3ccc(cc3nc2SCC(=O)c4ccc4)Br                                        |
| ZINC08439892 | 4.42  | -4                | -8.27            | 1        | 8           | 0      | 443.475         | 6              | CCN1c2ccc(cc2)N(C@H)3[C@@H]1OC(=C3C(=O)OC4ccc4)C(F)N5CCOC5                       |
| ZINC08439891 | 4.42  | -4.59             | -8.17            | 1        | 8           | 0      | 443.475         | 6              | CCN1c2ccc(cc2)N(C@H)3[C@@H]1OC(=C3C(=O)OC4ccc4)C(F)N5CCOC5                       |
| ZINC08439890 | 6.58  | -3.51             | -7.41            | 1        | 7           | 0      | 501.643         | 6              | CCN1c2ccc(cc2)N(C@H)3[C@@H]1OC(=C3C(=O)OC4ccc4)C(F)N5CCOC5                       |
| ZINC08439889 | 6.58  | -3.85             | -5.26            | 1        | 7           | 0      | 501.643         | 6              | CCN1c2ccc(cc2)N(C@H)3[C@@H]1OC(=C3C(=O)OC4ccc4)C(F)N5CCOC5                       |
| ZINC08439888 | 7.49  | 13.99             | -49.31           | 0        | 4           | -1     | 489.035         | 4              | CC1(C2=C(C(=O)C(C2=O)C)C(=O)O)C1c4ccc(cc4)OC5ccc(cc5)Cl)C(=O)C1C                 |
| ZINC08439888 | 7.07  | 0.82              | -13.04           | 0        | 4           | 0      | 490.043         | 4              | CC1(C2=C(C(=O)C(C2=O)C)C(=O)O)C1c4ccc(cc4)OC5ccc(cc5)Cl)C(=O)C1C                 |
| ZINC08439888 | 7.07  | 2.04              | -20.69           | 0        | 4           | 0      | 490.043         | 4              | CC1(C2=C(C(=O)C(C2=O)C)C(=O)O)C1c4ccc(cc4)OC5ccc(cc5)Cl)C(=O)C1C                 |
| ZINC08439888 | 6.91  | 1.07              | -15.78           | 0        | 4           | 0      | 490.043         | 4              | CC1(C2=C(C(=O)C(C2=O)C)C(=O)O)C1c4ccc(cc4)OC5ccc(cc5)Cl)C(=O)C1C                 |
| ZINC00720885 | 4.58  | -1.79             | -12.85           | 2        | 8           | 0      | 470.529         | 6              | CC1=C(C(=O)C(=O)C)C(=O)C1c4ccc(cc4)OC5ccc(cc5)Cl)C(=O)C1C                        |
| ZINC00717892 | 4.1   | 11.33             | -38.22           | 0        | 6           | -1     | 477.718         | 7              | CCOC(=O)CN1[C@H](C=C(C1=O)O)C(=O)c2ccc(cc2)C1c3ccc(cc3)Br                        |
| ZINC00717892 | 4.55  | -0.18             | -30.79           | 1        | 6           | 0      | 478.726         | 6              | CCOC(=O)CN1[C@H](C=C(C1=O)O)C(=O)c2ccc(cc2)C1c3ccc(cc3)Br                        |
| ZINC00717892 | 3.52  | 0.08              | -25.08           | 0        | 6           | 0      | 478.726         | 7              | CCOC(=O)CN1[C@H](C=C(C1=O)O)C(=O)c2ccc(cc2)C1c3ccc(cc3)Br                        |
| ZINC00717893 | 4.1   | 11.37             | -37.54           | 0        | 6           | -1     | 477.718         | 7              | CCOC(=O)CN1[C@H](C=C(C1=O)O)C(=O)c2ccc(cc2)C1c3ccc(cc3)Br                        |
| ZINC00717893 | 4.55  | -0.16             | -31.18           | 1        | 6           | 0      | 478.726         | 6              | CCOC(=O)CN1[C@H](C=C(C1=O)O)C(=O)c2ccc(cc2)C1c3ccc(cc3)Br                        |
| ZINC00717893 | 3.52  | 0.08              | -25.35           | 0        | 6           | 0      | 478.726         | 7              | CCOC(=O)CN1[C@H](C=C(C1=O)O)C(=O)c2ccc(cc2)C1c3ccc(cc3)Br                        |
| ZINC08439886 | 3.4   | 2.62              | -17.49           | 1        | 12          | 0      | 503.519         | 8              | Cn1c2c(m1)N(C(=O)Nc3cccnc3C(=O)OC)/N=C/C4ccc4n(c1=O)nc2=O)C1C                    |
| ZINC08439886 | 3.4   | 2.87              | -37.22           | 2        | 12          | 1      | 504.527         | 8              | Cn1c2c(m1)N(C(=O)Nc3cccnc3C(=O)OC)/N=C/C4ccc4n(c1=O)nc2=O)C1C                    |
| ZINC00717758 | 4.71  | -0.02             | -11.17           | 1        | 4           | 0      | 423.921         | 6              | c1ccc(cc1)CCN2[C@H](C=C(C2=O)O)C(=O)c3cccnc3c4ccc4C1                             |
| ZINC00717758 | 4.13  | -0.2              | -14.91           | 0        | 4           | 0      | 423.921         | 6              | c1ccc(cc1)CCN2[C@H](C=C(C2=O)O)C(=O)c3cccnc3c4ccc4C1                             |
| ZINC00717759 | 4.71  | -0.12             | -10.92           | 1        | 4           | 0      | 423.921         | 6              | c1ccc(cc1)CCN2[C@H](C=C(C2=O)O)C(=O)c3cccnc3c4ccc4C1                             |
| ZINC00717759 | 4.13  | -0.09             | -17.14           | 0        | 4           | 0      | 423.921         | 6              | c1ccc(cc1)CCN2[C@H](C=C(C2=O)O)C(=O)c3cccnc3c4ccc4C1                             |
| ZINC08439885 | 5.06  | 1.66              | -13.02           | 0        | 8           | 0      | 567.704         | 12             | CCSCCOC(=O)C1[C@@H](C2=C(C(=O)C)C(=O)C)C(=O)C1c3cccnc3C(=O)N=C1O)c4ccc(cc4)OC)OC |
| ZINC08439885 | 5.06  | 1.31              | -16.62           | 0        | 8           | 0      | 567.704         | 12             | CCSCCOC(=O)C1[C@@H](C2=C(C(=O)C)C(=O)C)C(=O)C1c3cccnc3C(=O)N=C1O)c4ccc(cc4)OC)OC |
| ZINC08439885 | 5.24  | 0.39              | -14.4            | 0        | 8           | 0      | 567.704         | 12             | CCSCCOC(=O)C1[C@@H](C2=C(C(=O)C)C(=O)C)C(=O)C1c3cccnc3C(=O)N=C1O)c4ccc(cc4)OC)OC |
| ZINC08439884 | 5.06  | 1.69              | -12.98           | 0        | 8           | 0      | 567.704         | 12             | CCSCCOC(=O)C1[C@@H](C2=C(C(=O)C)C(=O)C)C(=O)C1c3cccnc3C(=O)N=C1O)c4ccc(cc4)OC)OC |
| ZINC08439884 | 5.06  | 1.43              | -15.21           | 0        | 8           | 0      | 567.704         | 12             | CCSCCOC(=O)C1[C@@H](C2=C(C(=O)C)C(=O)C)C(=O)C1c3cccnc3C(=O)N=C1O)c4ccc(cc4)OC)OC |

**Supplementary Table S2:**  
**Detailed table of XP Docking using Schrodinger's Glide module**

| ZINC_ID      | sLogP | ApolarDesolvation | PolarDesolvation | H Donors | H Acceptors | Charge | MolecularWeight | RotatableBonds | SMILES                                                                      |
|--------------|-------|-------------------|------------------|----------|-------------|--------|-----------------|----------------|-----------------------------------------------------------------------------|
| ZINC08439884 | 5.24  | 0.56              | -13.68           | 0        | 8           | 0      | 567.704         | 12             | CCSCCOC(=O)C1[C@H](C2C=NC1=C)C[C@@H](CC2=O)c3ccccc3OC)c4cc(c(c4)OC)OC       |
| ZINC08439883 | 5.06  | 1.65              | -15.5            | 0        | 8           | 0      | 567.704         | 12             | CCSCCOC(=O)C1[C@H](C2=C(C)C[C@H](CC2=O)c3ccccc3OC)N=C1C)c4cc(c(c4)OC)OC     |
| ZINC08439883 | 5.06  | 1.36              | -16.45           | 0        | 8           | 0      | 567.704         | 12             | CCSCCOC(=O)C1=C(N=C2C[C@H](CC(=O)C2)C[C@@H]1c3cc(c(c3)OC)OC)c4ccccc4OC      |
| ZINC08439883 | 5.24  | 0.35              | -14.24           | 0        | 8           | 0      | 567.704         | 12             | CCSCCOC(=O)C1[C@H](C2C=NC1=C)C[C@@H](CC2=O)c3ccccc3OC)c4cc(c(c4)OC)OC       |
| ZINC08439882 | 5.06  | 1.68              | -13.68           | 0        | 8           | 0      | 567.704         | 12             | CCSCCOC(=O)C1[C@H](C2=C(C)C[C@H](CC2=O)c3ccccc3OC)N=C1C)c4cc(c(c4)OC)OC     |
| ZINC08439882 | 5.06  | 1.33              | -16.73           | 0        | 8           | 0      | 567.704         | 12             | CCSCCOC(=O)C1=C(N=C2C[C@H](CC(=O)C2)C[C@@H]1c3cc(c(c3)OC)OC)c4ccccc4OC      |
| ZINC08439882 | 5.24  | 0.45              | -14.86           | 0        | 8           | 0      | 567.704         | 12             | CCSCCOC(=O)C1[C@H](C2C=NC1=C)C[C@@H](CC2=O)c3ccccc3OC)c4cc(c(c4)OC)OC       |
| ZINC08439881 | 4.82  | 2.87              | -14.46           | 0        | 7           | 0      | 489.568         | 8              | CC1=NC2=C([C@@H](C1C(=O)OC(C)C)c3ccc(cc3)OC(=O)C)C(=O)C[C@@H](C2)c4ccccc4OC |
| ZINC08439881 | 5     | 2.93              | -15.29           | 0        | 7           | 0      | 489.568         | 8              | CC(C)OC(=O)C1[C@H](C2C=NC1=C)C[C@@H](CC2=O)c3ccccc3OC)c4cc(c(c4)OC(=O)C     |
| ZINC08439881 | 5     | 4.33              | -21.04           | 0        | 7           | 0      | 489.568         | 8              | CC(C)OC(=O)C1[C@H](C2C=NC1=C)C[C@@H](CC2=O)c3ccccc3OC)c4cc(c(c4)OC(=O)C     |
| ZINC08439881 | 4.82  | 2.8               | -16.76           | 0        | 7           | 0      | 489.568         | 8              | CC1=C([C@@H]([C@@H]2C(=N1)C[C@H](CC2=O)c3ccccc3OC)c4cc(c(c4)OC(=O)C)C       |
| ZINC08439880 | 4.82  | 2.85              | -12.74           | 0        | 7           | 0      | 489.568         | 8              | CC1=NC2=C([C@@H](C1C(=O)OC(C)C)c3ccc(cc3)OC(=O)C)C(=O)C[C@@H](C2)c4ccccc4OC |
| ZINC08439880 | 5     | 2.98              | -13.82           | 0        | 7           | 0      | 489.568         | 8              | CC(C)OC(=O)C1[C@H](C2C=NC1=C)C[C@@H](CC2=O)c3ccccc3OC)c4cc(c(c4)OC(=O)C     |
| ZINC08439880 | 5     | 4.25              | -15.15           | 0        | 7           | 0      | 489.568         | 8              | CC(C)OC(=O)C1[C@H](C2C=NC1=C)C[C@@H](CC2=O)c3ccccc3OC)c4cc(c(c4)OC(=O)C     |
| ZINC08439880 | 4.82  | 2.87              | -16.24           | 0        | 7           | 0      | 489.568         | 8              | CC1=C([C@@H]([C@@H]2C(=N1)C[C@H](CC2=O)c3ccccc3OC)c4cc(c(c4)OC(=O)C)C       |
| ZINC08439879 | 4.82  | 2.79              | -13.76           | 0        | 7           | 0      | 489.568         | 8              | CC1=NC2=C([C@@H](C1C(=O)OC(C)C)c3ccc(cc3)OC(=O)C)C(=O)C[C@@H](C2)c4ccccc4OC |
| ZINC08439879 | 5     | 2.93              | -13.59           | 0        | 7           | 0      | 489.568         | 8              | CC(C)OC(=O)C1[C@H](C2C=NC1=C)C[C@@H](CC2=O)c3ccccc3OC)c4cc(c(c4)OC(=O)C     |
| ZINC08439879 | 5     | 4.2               | -14.84           | 0        | 7           | 0      | 489.568         | 8              | CC(C)OC(=O)C1[C@H](C2C=NC1=C)C[C@@H](CC2=O)c3ccccc3OC)c4cc(c(c4)OC(=O)C     |
| ZINC08439879 | 4.82  | 3                 | -15.01           | 0        | 7           | 0      | 489.568         | 8              | CC1=C([C@@H]([C@@H]2C(=N1)C[C@H](CC2=O)c3ccccc3OC)c4cc(c(c4)OC(=O)C)C       |
| ZINC08439878 | 4.82  | 2.98              | -15.35           | 0        | 7           | 0      | 489.568         | 8              | CC1=NC2=C([C@@H](C1C(=O)OC(C)C)c3ccc(cc3)OC(=O)C)C(=O)C[C@@H](C2)c4ccccc4OC |
| ZINC08439878 | 5     | 3.02              | -14.7            | 0        | 7           | 0      | 489.568         | 8              | CC(C)OC(=O)C1[C@H](C2C=NC1=C)C[C@@H](CC2=O)c3ccccc3OC)c4cc(c(c4)OC(=O)C     |
| ZINC08439878 | 4.82  | 3.01              | -16.44           | 0        | 7           | 0      | 489.568         | 8              | CC1=C([C@@H]([C@@H]2C(=N1)C[C@H](CC2=O)c3ccccc3OC)c4cc(c(c4)OC(=O)C)C       |
| ZINC08439877 | 5.32  | 0.43              | -11.09           | 0        | 6           | 0      | 512.4           | 6              | CC1=NC2=C([C@@H](C1C(=O)OC(C)C)c3ccc(cc3)Br)OC(=O)C[C@@H](C2)c4ccccc4OC     |
| ZINC08439877 | 5.5   | 0.69              | -11.96           | 0        | 6           | 0      | 512.4           | 6              | COC1ccccc1[C@@H]2CC3=NC(=C)C[C@@H](C3C(=O)C2)c4cc(c(c4)Br)OC(=O)OC          |
| ZINC08439877 | 5.5   | 1.73              | -12.13           | 0        | 6           | 0      | 512.4           | 6              | COC1ccccc1[C@@H]2CC3=NC(=C)C[C@@H](C3C(=O)C2)c4cc(c(c4)Br)OC(=O)OC          |
| ZINC08439877 | 5.32  | 0.53              | -12.81           | 0        | 6           | 0      | 512.4           | 6              | CC1=C([C@@H]([C@@H]2C(=N1)C[C@H](CC2=O)c3ccccc3OC)c4cc(c(c4)Br)OC(=O)OC     |
| ZINC08439876 | 5.32  | 0.39              | -10.23           | 0        | 6           | 0      | 512.4           | 6              | CC1=NC2=C([C@@H](C1C(=O)OC(C)C)c3ccc(cc3)Br)OC(=O)C[C@@H](C2)c4ccccc4OC     |
| ZINC08439876 | 5.5   | 0.52              | -11.19           | 0        | 6           | 0      | 512.4           | 6              | COC1ccccc1[C@@H]2CC3=NC(=C)C[C@@H](C3C(=O)C2)c4cc(c(c4)Br)OC(=O)OC          |
| ZINC08439876 | 5.5   | 1.71              | -17.39           | 0        | 6           | 0      | 512.4           | 6              | COC1ccccc1[C@@H]2CC3=NC(=C)C[C@@H](C3C(=O)C2)c4cc(c(c4)Br)OC(=O)OC          |
| ZINC08439876 | 5.32  | 0.4               | -12.43           | 0        | 6           | 0      | 512.4           | 6              | CC1=C([C@@H]([C@@H]2C(=N1)C[C@H](CC2=O)c3ccccc3OC)c4cc(c(c4)Br)OC(=O)OC     |
| ZINC08439875 | 5.32  | 0.32              | -10.77           | 0        | 6           | 0      | 512.4           | 6              | CC1=NC2=C([C@@H](C1C(=O)OC(C)C)c3ccc(cc3)Br)OC(=O)C[C@@H](C2)c4ccccc4OC     |
| ZINC08439875 | 5.5   | 0.45              | -11.22           | 0        | 6           | 0      | 512.4           | 6              | COC1ccccc1[C@@H]2CC3=NC(=C)C[C@@H](C3C(=O)C2)c4cc(c(c4)Br)OC(=O)OC          |
| ZINC08439875 | 5.5   | 1.56              | -12.08           | 0        | 6           | 0      | 512.4           | 6              | COC1ccccc1[C@@H]2CC3=NC(=C)C[C@@H](C3C(=O)C2)c4cc(c(c4)Br)OC(=O)OC          |
| ZINC08439875 | 5.32  | 0.45              | -13.24           | 0        | 6           | 0      | 512.4           | 6              | CC1=C([C@@H]([C@@H]2C(=N1)C[C@H](CC2=O)c3ccccc3OC)c4cc(c(c4)Br)OC(=O)OC     |
| ZINC08439874 | 5.32  | 0.39              | -11.21           | 0        | 6           | 0      | 512.4           | 6              | CC1=NC2=C([C@@H](C1C(=O)OC(C)C)c3ccc(cc3)Br)OC(=O)C[C@@H](C2)c4ccccc4OC     |
| ZINC08439874 | 5.5   | 0.62              | -11.96           | 0        | 6           | 0      | 512.4           | 6              | COC1ccccc1[C@@H]2CC3=NC(=C)C[C@@H](C3C(=O)C2)c4cc(c(c4)Br)OC(=O)OC          |
| ZINC08439874 | 5.5   | 1.61              | -11.46           | 0        | 6           | 0      | 512.4           | 6              | COC1ccccc1[C@@H]2CC3=NC(=C)C[C@@H](C3C(=O)C2)c4cc(c(c4)Br)OC(=O)OC          |
| ZINC08439874 | 5.32  | 0.51              | -12.88           | 0        | 6           | 0      | 512.4           | 6              | CC1=C([C@@H]([C@@H]2C(=N1)C[C@H](CC2=O)c3ccccc3OC)c4cc(c(c4)Br)OC(=O)OC     |
| ZINC0717118  | 5.55  | 2.13              | -12.68           | 0        | 7           | 0      | 500.356         | 2              | Cn1c2c(c(=O)nc1=O)Cn3ccn(c3n2)c4ccccc4c5ccccc5)Brc6ccccc6                   |
| ZINC08439872 | 2.03  | -2.91             | -10.48           | 1        | 9           | 0      | 433.266         | 3              | Cn1c2c(c(=O)nc1=O)Cn3c(c2)N(N=C(C2)c4cc(c(c4)Br)CCO                         |
| ZINC08439872 | 2.03  | -2.62             | -38.67           | 2        | 9           | 1      | 434.274         | 3              | Cn1c2c(c(=O)nc1=O)Cn3c(c2)N(N=C(C2)c4cc(c(c4)Br)CCO                         |
| ZINC08439871 | 4.36  | 1.12              | -9.85            | 0        | 8           | 0      | 465.311         | 2              | Cn1c2c(c(=O)nc1=O)Cn3c(c2)N(N=C(C2)c4cc(c(c4)Br)c5ccccc5                    |
| ZINC08439871 | 4.36  | 1.25              | -32.13           | 1        | 8           | 1      | 466.319         | 2              | Cn1c2c(c(=O)nc1=O)Cn3c(c2)N(N=C(C2)c4cc(c(c4)Br)c5ccccc5                    |
| ZINC08439870 | 5.17  | 1.16              | -10.6            | 0        | 7           | 0      | 511.64          | 9              | CC1=NC2=C([C@@H](C1C(=O)OC(C)C)c3ccc(cc3)OC)OC(=O)C[C@@H](C2)c4ccccc4       |
| ZINC08439870 | 5.35  | 1.39              | -11.05           | 0        | 7           | 0      | 511.64          | 9              | CC(C)OC(=O)C1[C@H](C2C=NC1=C)C[C@@H](CC2=O)c3ccccc3OC)c4cc(c(c4)OC)OC       |
| ZINC08439870 | 5.35  | 2.38              | -11.03           | 0        | 7           | 0      | 511.64          | 9              | CC(C)OC(=O)C1[C@H](C2C=NC1=C)C[C@@H](CC2=O)c3ccccc3OC)c4cc(c(c4)OC)OC       |
| ZINC08439870 | 5.17  | 1.27              | -12.93           | 0        | 7           | 0      | 511.64          | 9              | CC1=C([C@@H]([C@@H]2C(=N1)C[C@H](CC2=O)c3ccccc3OC)c4cc(c(c4)OC)OC(=O)OC     |
| ZINC08439869 | 5.17  | 1.14              | -10.61           | 0        | 7           | 0      | 511.64          | 9              | CC1=NC2=C([C@@H](C1C(=O)OC(C)C)c3ccc(cc3)OC)OC(=O)C[C@@H](C2)c4ccccc4       |
| ZINC08439869 | 5.35  | 1.14              | -11.77           | 0        | 7           | 0      | 511.64          | 9              | CC(C)OC(=O)C1[C@H](C2C=NC1=C)C[C@@H](CC2=O)c3ccccc3OC)c4cc(c(c4)OC)OC       |
| ZINC08439869 | 5.35  | 2.36              | -10.88           | 0        | 7           | 0      | 511.64          | 9              | CC(C)OC(=O)C1[C@H](C2C=NC1=C)C[C@@H](CC2=O)c3ccccc3OC)c4cc(c(c4)OC)OC       |
| ZINC08439869 | 5.17  | 1.19              | -13.37           | 0        | 7           | 0      | 511.64          | 9              | CC1=C([C@@H]([C@@H]2C(=N1)C[C@H](CC2=O)c3ccccc3OC)c4cc(c(c4)OC)OC(=O)OC     |
| ZINC08439868 | 5.17  | 1.36              | -13.33           | 0        | 7           | 0      | 511.64          | 9              | CC1=NC2=C([C@@H](C1C(=O)OC(C)C)c3ccc(cc3)OC)OC(=O)C[C@@H](C2)c4ccccc4       |
| ZINC08439868 | 5.35  | 1.5               | -12.39           | 0        | 7           | 0      | 511.64          | 9              | CC(C)OC(=O)C1[C@H](C2C=NC1=C)C[C@@H](CC2=O)c3ccccc3OC)c4cc(c(c4)OC)OC       |
| ZINC08439868 | 5.35  | 2.65              | -16.27           | 0        | 7           | 0      | 511.64          | 9              | CC(C)OC(=O)C1[C@H](C2C=NC1=C)C[C@@H](CC2=O)c3ccccc3OC)c4cc(c(c4)OC)OC       |
| ZINC08439868 | 5.17  | 1.24              | -13.83           | 0        | 7           | 0      | 511.64          | 9              | CC1=C([C@@H]([C@@H]2C(=N1)C[C@H](CC2=O)c3ccccc3OC)c4cc(c(c4)OC)OC(=O)OC     |
| ZINC08439867 | 5.17  | 1.14              | -10.43           | 0        | 7           | 0      | 511.64          | 9              | CC1=NC2=C([C@@H](C1C(=O)OC(C)C)c3ccc(cc3)OC)OC(=O)C[C@@H](C2)c4ccccc4       |
| ZINC08439867 | 5.35  | 1.2               | -11.46           | 0        | 7           | 0      | 511.64          | 9              | CC(C)OC(=O)C1[C@H](C2C=NC1=C)C[C@@H](CC2=O)c3ccccc3OC)c4cc(c(c4)OC)OC       |
| ZINC08439867 | 5.35  | 2.62              | -16.9            | 0        | 7           | 0      | 511.64          | 9              | CC(C)OC(=O)C1[C@H](C2C=NC1=C)C[C@@H](CC2=O)c3ccccc3OC)c4cc(c(c4)OC)OC       |
| ZINC08439867 | 5.17  | 1.08              | -13.74           | 0        | 7           | 0      | 511.64          | 9              | CC1=C([C@@H]([C@@H]2C(=N1)C[C@H](CC2=O)c3ccccc3OC)c4cc(c(c4)OC)OC(=O)OC     |
| ZINC08439866 | 4.98  | 0.24              | -11.21           | 0        | 7           | 0      | 523.651         | 8              | CC1=NC2=C([C@@H](C1C(=O)OC(C)C)c3ccc(cc3)OC)OC(=O)C[C@@H](C2)c5ccccc5       |
| ZINC08439866 | 5.16  | 0.5               | -12.15           | 0        | 7           | 0      | 523.651         | 8              | COC1cc(c(c1OC)OC)C[C@@H]2C3C(=NC(=C)C2C(=O)OC4CCC4)C[C@@H](CC3=O)c5ccccc5   |

**Supplementary Table S2:**  
**Detailed table of XP Docking using Schrodinger's Glide module**

| ZINC_ID      | sLogP | ApolarDesolvation | PolarDesolvation | H Donors | H Acceptors | Charge | MolecularWeight | RotatableBonds | SMILES                                                                              |
|--------------|-------|-------------------|------------------|----------|-------------|--------|-----------------|----------------|-------------------------------------------------------------------------------------|
| ZINC08439866 | 5.16  | 1.54              | -12.65           | 0        | 7           | 0      | 523.651         | 8              | COC1cc(c(cc1OC)OC)C@H]2[C@@H]3C(=NC(=C)C2C(=O)OC4CCCC4)C[C@@H](CC3=O)c5cccs5        |
| ZINC08439866 | 4.98  | 0.34              | -13.83           | 0        | 7           | 0      | 523.651         | 8              | CC1=C[C@@H](C@H)2C(=N1)C[C@@H](CC2=O)c3cccs3)c4cc(c(cc4OC)OC)OC[C@H](C2)c5cccs5     |
| ZINC08439865 | 4.98  | 0.32              | -14.77           | 0        | 7           | 0      | 523.651         | 8              | CC1=NC2=C[C@@H](C1C(=O)OC3CCCC3)c4cc(c(cc4OC)OC)OC[C@H](C2)c5cccs5                  |
| ZINC08439865 | 5.16  | 0.44              | -14.13           | 0        | 7           | 0      | 523.651         | 8              | COC1cc(c(cc1OC)OC)C@H]2C3C(=NC(=C)C2C(=O)OC4CCCC4)C[C@@H](CC3=O)c5cccs5             |
| ZINC08439865 | 5.16  | 1.58              | -15.56           | 0        | 7           | 0      | 523.651         | 8              | COC1cc(c(cc1OC)OC)C@H]2[C@@H]3C(=NC(=C)C2C(=O)OC4CCCC4)C[C@@H](CC3=O)c5cccs5        |
| ZINC08439865 | 4.98  | 0.18              | -15.74           | 0        | 7           | 0      | 523.651         | 8              | CC1=C[C@@H](C@H)2C(=N1)C[C@@H](CC2=O)c3cccs3)c4cc(c(cc4OC)OC)OC[C@H](C2)c5cccs5     |
| ZINC08439864 | 4.98  | 0.13              | -11.52           | 0        | 7           | 0      | 523.651         | 8              | CC1=NC2=C[C@@H](C1C(=O)OC3CCCC3)c4cc(c(cc4OC)OC)OC[C@H](C2)c5cccs5                  |
| ZINC08439864 | 5.16  | 0.26              | -11.93           | 0        | 7           | 0      | 523.651         | 8              | COC1cc(c(cc1OC)OC)C@H]2C3C(=NC(=C)C2C(=O)OC4CCCC4)C[C@@H](CC3=O)c5cccs5             |
| ZINC08439864 | 5.16  | 1.38              | -12.86           | 0        | 7           | 0      | 523.651         | 8              | COC1cc(c(cc1OC)OC)C@H]2[C@@H]3C(=NC(=C)C2C(=O)OC4CCCC4)C[C@@H](CC3=O)c5cccs5        |
| ZINC08439864 | 4.98  | 0.26              | -13.87           | 0        | 7           | 0      | 523.651         | 8              | CC1=C[C@@H](C@H)2C(=N1)C[C@@H](CC2=O)c3cccs3)c4cc(c(cc4OC)OC)OC[C@H](C2)c5cccs5     |
| ZINC08439863 | 4.98  | 0.21              | -11.29           | 0        | 7           | 0      | 523.651         | 8              | CC1=NC2=C[C@@H](C1C(=O)OC3CCCC3)c4cc(c(cc4OC)OC)OC[C@H](C2)c5cccs5                  |
| ZINC08439863 | 5.16  | 0.27              | -12.07           | 0        | 7           | 0      | 523.651         | 8              | COC1cc(c(cc1OC)OC)C@H]2C3C(=NC(=C)C2C(=O)OC4CCCC4)C[C@@H](CC3=O)c5cccs5             |
| ZINC08439863 | 5.16  | 1.42              | -13.5            | 0        | 7           | 0      | 523.651         | 8              | COC1cc(c(cc1OC)OC)C@H]2[C@@H]3C(=NC(=C)C2C(=O)OC4CCCC4)C[C@@H](CC3=O)c5cccs5        |
| ZINC08439863 | 4.98  | 0.16              | -14.49           | 0        | 7           | 0      | 523.651         | 8              | CC1=C[C@@H](C@H)2C(=N1)C[C@@H](CC2=O)c3cccs3)c4cc(c(cc4OC)OC)OC[C@H](C2)c5cccs5     |
| ZINC08439862 | 5.75  | -0.22             | -12.14           | 0        | 4           | 0      | 550.515         | 8              | CCSCCOC(=O)C1C[C@@H](C2=C(C)C@H)(CC2=O)c3cccs3)N=C1C)c4cc(ccc4F)Br                  |
| ZINC08439862 | 5.75  | -0.4              | -12.86           | 0        | 4           | 0      | 550.515         | 8              | CCSCCOC(=O)C1C=C(N=C2C[C@@H](CC(=O)C2)C@H]1c3ccc(cc3F)Br)c4cccs4)C                  |
| ZINC08439862 | 5.93  | -1.27             | -11.52           | 0        | 4           | 0      | 550.515         | 8              | CCSCCOC(=O)C1C[C@@H](C2C(=NC1=C)C[C@@H](CC2=O)c3cccs3)c4cc(ccc4F)Br                 |
| ZINC08439861 | 5.75  | -0.34             | -7.78            | 0        | 4           | 0      | 550.515         | 8              | CCSCCOC(=O)C1C[C@@H](C2=C(C)C@H)(CC2=O)c3cccs3)N=C1C)c4cc(ccc4F)Br                  |
| ZINC08439861 | 5.75  | -0.42             | -10.21           | 0        | 4           | 0      | 550.515         | 8              | CCSCCOC(=O)C1C=C(N=C2C[C@@H](CC(=O)C2)C@H]1c3ccc(cc3F)Br)c4cccs4)C                  |
| ZINC08439861 | 5.93  | -1.28             | -8.8             | 0        | 4           | 0      | 550.515         | 8              | CCSCCOC(=O)C1C[C@@H](C2C(=NC1=C)C[C@@H](CC2=O)c3cccs3)c4cc(ccc4F)Br                 |
| ZINC08439860 | 5.75  | -0.18             | -7.97            | 0        | 4           | 0      | 550.515         | 8              | CCSCCOC(=O)C1C[C@@H](C2=C(C)C@H)(CC2=O)c3cccs3)N=C1C)c4cc(ccc4F)Br                  |
| ZINC08439860 | 5.75  | -0.44             | -10.46           | 0        | 4           | 0      | 550.515         | 8              | CCSCCOC(=O)C1C=C(N=C2C[C@@H](CC(=O)C2)C@H]1c3ccc(cc3F)Br)c4cccs4)C                  |
| ZINC08439860 | 5.93  | -1.57             | -8.58            | 0        | 4           | 0      | 550.515         | 8              | CCSCCOC(=O)C1C[C@@H](C2C(=NC1=C)C[C@@H](CC2=O)c3cccs3)c4cc(ccc4F)Br                 |
| ZINC08439859 | 5.75  | -0.17             | -7.98            | 0        | 4           | 0      | 550.515         | 8              | CCSCCOC(=O)C1C[C@@H](C2=C(C)C@H)(CC2=O)c3cccs3)N=C1C)c4cc(ccc4F)Br                  |
| ZINC08439859 | 5.75  | -0.35             | -10.58           | 0        | 4           | 0      | 550.515         | 8              | CCSCCOC(=O)C1C=C(N=C2C[C@@H](CC(=O)C2)C@H]1c3ccc(cc3F)Br)c4cccs4)C                  |
| ZINC08439859 | 5.93  | -1.27             | -8.99            | 0        | 4           | 0      | 550.515         | 8              | CCSCCOC(=O)C1C[C@@H](C2C(=NC1=C)C[C@@H](CC2=O)c3cccs3)c4cc(ccc4F)Br                 |
| ZINC08439858 | 6.21  | 2                 | -10.06           | 0        | 4           | 0      | 521.626         | 9              | CCSCCOC(=O)C1C[C@@H](C2=C(C)C@H)(CC2=O)c3cccs3)N=C1C)c4cc(ccc4)C(F)(F)F             |
| ZINC08439858 | 6.21  | 1.65              | -10.68           | 0        | 4           | 0      | 521.626         | 9              | CCSCCOC(=O)C1C=C(N=C2C[C@@H](CC(=O)C2)C@H]1c3ccc(cc3)C(F)(F)F)c4cccs4)C             |
| ZINC08439858 | 6.4   | 0.77              | -9.38            | 0        | 4           | 0      | 521.626         | 9              | CCSCCOC(=O)C1C[C@@H](C2C(=NC1=C)C[C@@H](CC2=O)c3cccs3)c4cc(ccc4)C(F)(F)F            |
| ZINC08439857 | 6.21  | 1.88              | -7.64            | 0        | 4           | 0      | 521.626         | 9              | CCSCCOC(=O)C1C[C@@H](C2=C(C)C@H)(CC2=O)c3cccs3)N=C1C)c4cc(ccc4)C(F)(F)F             |
| ZINC08439857 | 6.21  | 1.8               | -9.88            | 0        | 4           | 0      | 521.626         | 9              | CCSCCOC(=O)C1C=C(N=C2C[C@@H](CC(=O)C2)C@H]1c3ccc(cc3)C(F)(F)F)c4cccs4)C             |
| ZINC08439857 | 6.4   | 0.75              | -8.67            | 0        | 4           | 0      | 521.626         | 9              | CCSCCOC(=O)C1C[C@@H](C2C(=NC1=C)C[C@@H](CC2=O)c3cccs3)c4cc(ccc4)C(F)(F)F            |
| ZINC08439856 | 6.21  | 2.03              | -7.33            | 0        | 4           | 0      | 521.626         | 9              | CCSCCOC(=O)C1C[C@@H](C2=C(C)C@H)(CC2=O)c3cccs3)N=C1C)c4cc(ccc4)C(F)(F)F             |
| ZINC08439856 | 6.21  | 1.78              | -9.98            | 0        | 4           | 0      | 521.626         | 9              | CCSCCOC(=O)C1C=C(N=C2C[C@@H](CC(=O)C2)C@H]1c3ccc(cc3)C(F)(F)F)c4cccs4)C             |
| ZINC08439856 | 6.4   | 0.85              | -8.66            | 0        | 4           | 0      | 521.626         | 9              | CCSCCOC(=O)C1C[C@@H](C2C(=NC1=C)C[C@@H](CC2=O)c3cccs3)c4cc(ccc4)C(F)(F)F            |
| ZINC08439855 | 6.21  | 2.04              | -7.26            | 0        | 4           | 0      | 521.626         | 9              | CCSCCOC(=O)C1C[C@@H](C2=C(C)C@H)(CC2=O)c3cccs3)N=C1C)c4cc(ccc4)C(F)(F)F             |
| ZINC08439855 | 6.21  | 1.87              | -10.01           | 0        | 4           | 0      | 521.626         | 9              | CCSCCOC(=O)C1C=C(N=C2C[C@@H](CC(=O)C2)C@H]1c3ccc(cc3)C(F)(F)F)c4cccs4)C             |
| ZINC08439855 | 6.4   | 0.95              | -8.73            | 0        | 4           | 0      | 521.626         | 9              | CCSCCOC(=O)C1C[C@@H](C2C(=NC1=C)C[C@@H](CC2=O)c3cccs3)c4cc(ccc4)C(F)(F)F            |
| ZINC08439854 | 5.56  | 1.54              | -13.09           | 0        | 8           | 0      | 547.648         | 9              | CC1=NC2=C[C@@H](C1C(=O)OC3CCCC3)c4cc(c(cc4OC)OC)OC[C@H](C2)c5cccs5OC                |
| ZINC08439854 | 5.74  | 1.82              | -13.13           | 0        | 8           | 0      | 547.648         | 9              | COC1cccc1[C@@H]2CC3=NC(=C)C[C@@H](C3C(=O)C2)c4cc(c(cc4OC)OC)OC[C@H](C2)c5cccs5OC    |
| ZINC08439854 | 5.74  | 2.85              | -14.36           | 0        | 8           | 0      | 547.648         | 9              | COC1cccc1[C@@H]2CC3=NC(=C)C[C@@H](C3C(=O)C2)c4cc(c(cc4OC)OC)OC[C@H](C2)c5cccs5OC    |
| ZINC08439854 | 5.56  | 1.65              | -14.79           | 0        | 8           | 0      | 547.648         | 9              | CC1=C[C@@H](C@H)2C(=N1)C[C@@H](CC2=O)c3cccs3OC)c4cc(c(cc4OC)OC)OC[C@H](C2)c5cccs5OC |
| ZINC08439853 | 5.56  | 1.55              | -12.38           | 0        | 8           | 0      | 547.648         | 9              | COC1cccc1[C@@H]2CC3=NC(=C)C[C@@H](C3C(=O)C2)c4cc(c(cc4OC)OC)OC[C@H](C2)c5cccs5OC    |
| ZINC08439853 | 5.74  | 1.3               | -12.9            | 0        | 8           | 0      | 547.648         | 9              | COC1cccc1[C@@H]2CC3=NC(=C)C[C@@H](C3C(=O)C2)c4cc(c(cc4OC)OC)OC[C@H](C2)c5cccs5OC    |
| ZINC08439853 | 5.74  | 2.75              | -20.02           | 0        | 8           | 0      | 547.648         | 9              | COC1cccc1[C@@H]2CC3=NC(=C)C[C@@H](C3C(=O)C2)c4cc(c(cc4OC)OC)OC[C@H](C2)c5cccs5OC    |
| ZINC08439853 | 5.56  | 1.65              | -15.29           | 0        | 8           | 0      | 547.648         | 9              | CC1=C[C@@H](C@H)2C(=N1)C[C@@H](CC2=O)c3cccs3OC)c4cc(c(cc4OC)OC)OC[C@H](C2)c5cccs5OC |
| ZINC08439852 | 5.56  | 1.52              | -12.49           | 0        | 8           | 0      | 547.648         | 9              | CC1=NC2=C[C@@H](C1C(=O)OC3CCCC3)c4cc(c(cc4OC)OC)OC[C@H](C2)c5cccs5OC                |
| ZINC08439852 | 5.74  | 1.66              | -12.88           | 0        | 8           | 0      | 547.648         | 9              | COC1cccc1[C@@H]2CC3=NC(=C)C[C@@H](C3C(=O)C2)c4cc(c(cc4OC)OC)OC[C@H](C2)c5cccs5OC    |
| ZINC08439852 | 5.74  | 2.91              | -14.6            | 0        | 8           | 0      | 547.648         | 9              | COC1cccc1[C@@H]2CC3=NC(=C)C[C@@H](C3C(=O)C2)c4cc(c(cc4OC)OC)OC[C@H](C2)c5cccs5OC    |
| ZINC08439852 | 5.56  | 1.54              | -14.99           | 0        | 8           | 0      | 547.648         | 9              | CC1=C[C@@H](C@H)2C(=N1)C[C@@H](CC2=O)c3cccs3OC)c4cc(c(cc4OC)OC)OC[C@H](C2)c5cccs5OC |
| ZINC08439851 | 5.56  | 1.53              | -12.81           | 0        | 8           | 0      | 547.648         | 9              | CC1=NC2=C[C@@H](C1C(=O)OC3CCCC3)c4cc(c(cc4OC)OC)OC[C@H](C2)c5cccs5OC                |
| ZINC08439851 | 5.74  | 1.75              | -13.35           | 0        | 8           | 0      | 547.648         | 9              | COC1cccc1[C@@H]2CC3=NC(=C)C[C@@H](C3C(=O)C2)c4cc(c(cc4OC)OC)OC[C@H](C2)c5cccs5OC    |
| ZINC08439851 | 5.74  | 2.74              | -13.12           | 0        | 8           | 0      | 547.648         | 9              | COC1cccc1[C@@H]2CC3=NC(=C)C[C@@H](C3C(=O)C2)c4cc(c(cc4OC)OC)OC[C@H](C2)c5cccs5OC    |
| ZINC08439851 | 5.56  | 1.63              | -13.34           | 0        | 8           | 0      | 547.648         | 9              | CC1=C[C@@H](C@H)2C(=N1)C[C@@H](CC2=O)c3cccs3OC)c4cc(c(cc4OC)OC)OC[C@H](C2)c5cccs5OC |
| ZINC08439850 | 6.25  | -0.42             | -7.69            | 0        | 4           | 0      | 530.459         | 5              | CC1=NC2=C[C@@H](C1C(=O)OC3CCCC3)c4cc(ccc4F)Br]C(=O)C[C@@H](C2)c5cccs5               |
| ZINC08439850 | 6.43  | -0.32             | -7.93            | 0        | 4           | 0      | 530.459         | 5              | C=C1C[C@@H](C@H)2C(=N1)C[C@@H](CC2=O)c3cccs3)c4cc(ccc4F)Br]C(=O)OC5CCCC5            |
| ZINC08439850 | 6.43  | 0.99              | -15.99           | 0        | 4           | 0      | 530.459         | 5              | C=C1C[C@@H](C@H)2C(=N1)C[C@@H](CC2=O)c3cccs3)c4cc(ccc4F)Br]C(=O)OC5CCCC5            |
| ZINC08439850 | 6.25  | -0.28             | -10.09           | 0        | 4           | 0      | 530.459         | 5              | CC1=C[C@@H](C@H)2C(=N1)C[C@@H](CC2=O)c3cccs3)c4cc(ccc4F)Br]C(=O)OC5CCCC5            |
| ZINC08439849 | 6.25  | -0.42             | -7.54            | 0        | 4           | 0      | 530.459         | 5              | CC1=NC2=C[C@@H](C1C(=O)OC3CCCC3)c4cc(ccc4F)Br]C(=O)C[C@@H](C2)c5cccs5               |
| ZINC08439849 | 6.43  | -0.33             | -8.04            | 0        | 4           | 0      | 530.459         | 5              | C=C1C[C@@H](C@H)2C(=N1)C[C@@H](CC2=O)c3cccs3)c4cc(ccc4F)Br]C(=O)OC5CCCC5            |
| ZINC08439849 | 6.43  | 0.74              | -8               | 0        | 4           | 0      | 530.459         | 5              | C=C1C[C@@H](C@H)2C(=N1)C[C@@H](CC2=O)c3cccs3)c4cc(ccc4F)Br]C(=O)OC5CCCC5            |





**Supplementary Table S2:**  
**Detailed table of XP Docking using Schrodinger's Glide module**

| ZINC_ID      | xLogP | ApolarDesolvation | PolarDesolvation | H Donors | H Acceptors | Charge | MolecularWeight | RotatableBonds | SMILES                                                                        |
|--------------|-------|-------------------|------------------|----------|-------------|--------|-----------------|----------------|-------------------------------------------------------------------------------|
| ZINC08439830 | 4.95  | 0.65              | -11.26           | 0        | 7           | 0      | 543.707         | 11             | CCSCCOC(=O)C1[C@@H](C2=C(C)C[C@@H](CC2=O)c3ccc3)N=C1C)c4cc(c(c4)OC)OC         |
| ZINC08439830 | 4.95  | 0.3               | -14.93           | 0        | 7           | 0      | 543.707         | 11             | CCSCCOC(=O)C1=C(N=C2C[C@@H](CC(=O)C2)C@H)1c3cc(c(c3)OC)OC)c4ccc4C             |
| ZINC08439830 | 5.13  | -0.63             | -12.73           | 0        | 7           | 0      | 543.707         | 11             | CCSCCOC(=O)C1[C@@H](C2C(=NC1=C)C[C@@H](CC2=O)c3ccc3)c4cc(c(c4)OC)OC           |
| ZINC08439829 | 4.52  | -2.64             | -28.09           | 1        | 10          | 0      | 555.653         | 13             | CCOc1ccc(cc1OCC)/C=N/NC(=O)CN(c2ccc(c2)OC)C[S](=O)(=O)c3ccc(cc3)C             |
| ZINC08439828 | 4.95  | 0.67              | -11.54           | 0        | 7           | 0      | 543.707         | 11             | CCSCCOC(=O)C1[C@@H](C2=C(C)C[C@@H](CC2=O)c3ccc3)N=C1C)c4cc(c(c4)OC)OC         |
| ZINC08439828 | 4.95  | 0.41              | -13.93           | 0        | 7           | 0      | 543.707         | 11             | CCSCCOC(=O)C1=C(N=C2C[C@@H](CC(=O)C2)C@H)1c3cc(c(c3)OC)OC)c4ccc4C             |
| ZINC08439828 | 5.13  | -0.47             | -12.2            | 0        | 7           | 0      | 543.707         | 11             | CCSCCOC(=O)C1[C@@H](C2C(=NC1=C)C[C@@H](CC2=O)c3ccc3)c4cc(c(c4)OC)OC           |
| ZINC08439827 | 4.79  | -2.53             | -25.45           | 1        | 9           | 0      | 523.611         | 12             | Cc1ccc(cc1)S(=O)(=O)N(C(=O)N/N=C/c2ccc(c2)OC=C)c3ccc(c3)OC                    |
| ZINC08439826 | 4.95  | 0.65              | -11.43           | 0        | 7           | 0      | 543.707         | 11             | CCSCCOC(=O)C1[C@@H](C2=C(C)C[C@@H](CC2=O)c3ccc3)N=C1C)c4cc(c(c4)OC)OC         |
| ZINC08439826 | 4.95  | 0.4               | -14.46           | 0        | 7           | 0      | 543.707         | 11             | CCSCCOC(=O)C1=C(N=C2C[C@@H](CC(=O)C2)C@H)1c3cc(c(c3)OC)OC)c4ccc4C             |
| ZINC08439826 | 5.13  | -0.53             | -12.5            | 0        | 7           | 0      | 543.707         | 11             | CCSCCOC(=O)C1[C@@H](C2C(=NC1=C)C[C@@H](CC2=O)c3ccc3)c4cc(c(c4)OC)OC           |
| ZINC08439825 | 3.54  | -3.29             | -30.92           | 1        | 10          | 0      | 539.61          | 9              | Cc1ccc(cc1)S(=O)(=O)N(C(=O)N/N=C(\C)/c2ccc3c(c2)OCOC3)c4ccc(c4)OC             |
| ZINC08439824 | 5.37  | -2.76             | -35.86           | 2        | 8           | 0      | 558.635         | 9              | Cc1ccc(cc1)S(=O)(=O)N(C(=O)N/N=C(\C)/c2ccc(c2)NC(=O)c3ccc3)c4ccc4F            |
| ZINC08439823 | 4.95  | 0.67              | -11.36           | 0        | 7           | 0      | 543.707         | 11             | CCSCCOC(=O)C1[C@@H](C2=C(C)C[C@@H](CC2=O)c3ccc3)N=C1C)c4cc(c(c4)OC)OC         |
| ZINC08439823 | 4.95  | 0.48              | -14.06           | 0        | 7           | 0      | 543.707         | 11             | CCSCCOC(=O)C1=C(N=C2C[C@@H](CC(=O)C2)C@H)1c3cc(c(c3)OC)OC)c4ccc4C             |
| ZINC08439823 | 5.13  | -0.43             | -12.22           | 0        | 7           | 0      | 543.707         | 11             | CCSCCOC(=O)C1[C@@H](C2C(=NC1=C)C[C@@H](CC2=O)c3ccc3)c4cc(c(c4)OC)OC           |
| ZINC08439822 | 4.43  | -1.5              | -32.8            | 1        | 8           | 0      | 480.521         | 9              | Cc1ccc(cc1)S(=O)(=O)N(C(=O)N/N=C/c2ccc(cc2)OCC#N)c3ccc3F                      |
| ZINC08439821 | 4.03  | -4.48             | -36.17           | 2        | 8           | 0      | 543.443         | 8              | C/C(=N)NC(=O)CN(c1ccc1Br)S(=O)(=O)C/c2ccc(c2)NC(=O)c3ccc3                     |
| ZINC08439820 | 5.18  | 1.1               | -8.96            | 0        | 4           | 0      | 439.552         | 6              | CC1=NC2=C([C@@H](C1C(=O)OCC(C)C)c3ccc3F)C(=O)C[C@@H](C2)C4ccc4                |
| ZINC08439820 | 5.36  | 1.33              | -9.62            | 0        | 4           | 0      | 439.552         | 6              | CC(C)COC(=O)C1[C@@H](C2C(=NC1=C)C[C@@H](CC2=O)c3ccc3)c4ccc4F                  |
| ZINC08439820 | 5.36  | 2.32              | -9.62            | 0        | 4           | 0      | 439.552         | 6              | CC(C)COC(=O)C1[C@@H](C2C(=NC1=C)C[C@@H](CC2=O)c3ccc3)c4ccc4F                  |
| ZINC08439820 | 5.18  | 1.22              | -11.53           | 0        | 4           | 0      | 439.552         | 6              | CC1=C([C@@H](C[C@@H]2C(=N1)C[C@@H](CC2=O)c3ccc3)c4ccc4F)C(=O)OCC(C)C          |
| ZINC08439819 | 2.38  | 5.49              | -33.07           | 2        | 8           | 0      | 481.372         | 7              | C/C(=N)NC(=O)CN(c1ccc1Br)S(=O)(=O)C/c2ccc(cc2)NC(=O)C                         |
| ZINC08439818 | 3.06  | 5.95              | -14.07           | 1        | 6           | 0      | 430.349         | 6              | C/C(=N)NC(=O)CN(c1ccc1Br)S(=O)(=O)C/c2ccc2                                    |
| ZINC08439817 | 2.67  | 5.99              | -18.47           | 1        | 8           | 0      | 482.356         | 6              | C/C(=N)NC(=O)CN(c1ccc1Br)S(=O)(=O)C/c2ccc3c(c2)OCC3                           |
| ZINC08439816 | 5.18  | 0.96              | -8.72            | 0        | 4           | 0      | 439.552         | 6              | CC1=NC2=C([C@@H](C1C(=O)OCC(C)C)c3ccc3F)C(=O)C[C@@H](C2)C4ccc4                |
| ZINC08439816 | 5.36  | 1.05              | -9.17            | 0        | 4           | 0      | 439.552         | 6              | CC(C)COC(=O)C1[C@@H](C2C(=NC1=C)C[C@@H](CC2=O)c3ccc3)c4ccc4F                  |
| ZINC08439816 | 5.36  | 2.12              | -9.08            | 0        | 4           | 0      | 439.552         | 6              | CC(C)COC(=O)C1[C@@H](C2C(=NC1=C)C[C@@H](CC2=O)c3ccc3)c4ccc4F                  |
| ZINC08439816 | 5.18  | 1.1               | -11.2            | 0        | 4           | 0      | 439.552         | 6              | CC1=C([C@@H](C[C@@H]2C(=N1)C[C@@H](CC2=O)c3ccc3)c4ccc4F)C(=O)OCC(C)C          |
| ZINC08439815 | 2.37  | 6.33              | -36.18           | 1        | 10          | 0      | 508.984         | 9              | CS(=O)(=O)N(C(=O)N/N=C/c1ccc(cc1)OCC(=O)N2COCOC2)c3ccc3Cl                     |
| ZINC08439813 | 5.11  | -2.9              | -24.67           | 1        | 8           | 0      | 493.585         | 12             | CCOc1ccc1N(C(=O)N/N=C/c2ccc(cc2)OCC=C)S(=O)(=O)c3ccc3                         |
| ZINC08439812 | 5.18  | 1.03              | -8.66            | 0        | 4           | 0      | 439.552         | 6              | CC1=NC2=C([C@@H](C1C(=O)OCC(C)C)c3ccc3F)C(=O)C[C@@H](C2)C4ccc4                |
| ZINC08439812 | 5.36  | 1.16              | -8.91            | 0        | 4           | 0      | 439.552         | 6              | CC(C)COC(=O)C1[C@@H](C2C(=NC1=C)C[C@@H](CC2=O)c3ccc3)c4ccc4F                  |
| ZINC08439812 | 5.36  | 2.44              | -10.35           | 0        | 4           | 0      | 439.552         | 6              | CC(C)COC(=O)C1[C@@H](C2C(=NC1=C)C[C@@H](CC2=O)c3ccc3)c4ccc4F                  |
| ZINC08439812 | 5.18  | 1.22              | -10.89           | 0        | 4           | 0      | 439.552         | 6              | CC1=C([C@@H](C[C@@H]2C(=N1)C[C@@H](CC2=O)c3ccc3)c4ccc4F)C(=O)OCC(C)C          |
| ZINC08439811 | 4.72  | -3.96             | -30.67           | 1        | 10          | 0      | 578.691         | 12             | CCOc1ccc1N(C(=O)N/N=C/c2ccc(cc2)OCC(=O)N3COCOC3)S(=O)(=O)c4ccc4               |
| ZINC08439810 | 5.69  | -3.42             | -27.4            | 1        | 7           | 0      | 513.619         | 9              | CCOc1ccc1N(C(=O)N/N=C/c2ccc3c4c2ccc4CC3)S(=O)(=O)c5ccc5                       |
| ZINC08439809 | 5.18  | 1.24              | -13.78           | 0        | 4           | 0      | 439.552         | 6              | CC1=NC2=C([C@@H](C1C(=O)OCC(C)C)c3ccc3F)C(=O)C[C@@H](C2)C4ccc4                |
| ZINC08439809 | 5.36  | 1.45              | -13.28           | 0        | 4           | 0      | 439.552         | 6              | CC(C)COC(=O)C1[C@@H](C2C(=NC1=C)C[C@@H](CC2=O)c3ccc3)c4ccc4F                  |
| ZINC08439809 | 5.36  | 2.75              | -28.13           | 0        | 4           | 0      | 439.552         | 6              | CC(C)COC(=O)C1[C@@H](C2C(=NC1=C)C[C@@H](CC2=O)c3ccc3)c4ccc4F                  |
| ZINC08439809 | 5.18  | 1.2               | -14.58           | 0        | 4           | 0      | 439.552         | 6              | CC1=C([C@@H](C[C@@H]2C(=N1)C[C@@H](CC2=O)c3ccc3)c4ccc4F)C(=O)OCC(C)C          |
| ZINC08439808 | 7.25  | -0.04             | -34.5            | 1        | 9           | 0      | 634.032         | 12             | CCOC(=O)c1ccc(cc1)c2ccc(cc2)/C=N/NC(=O)CN(c3ccc(c3)C(F)F)F)S(=O)(=O)c4ccc4    |
| ZINC08439807 | 4.63  | -2.06             | -35.09           | 2        | 8           | 0      | 566.989         | 9              | C/C(=N)NC(=O)CN(c1ccc(c1)C(F)F)F)S(=O)(=O)c2ccc2/c3ccc(c3)NC(=O)C             |
| ZINC08439806 | 4.66  | -2.15             | -27.51           | 2        | 8           | 0      | 566.989         | 9              | C/C(=N)NC(=O)CN(c1ccc(c1)C(F)F)F)S(=O)(=O)c2ccc2/c3ccc(c3)NC(=O)C             |
| ZINC08439805 | 5.85  | -0.23             | -8.74            | 0        | 5           | 0      | 463.599         | 6              | CC1=NC2=C([C@@H](C1C(=O)OCC(C)C)c3ccc3F)C(=O)C[C@@H](C2)C5ccc5                |
| ZINC08439805 | 6.03  | -0.17             | -9.41            | 0        | 5           | 0      | 463.599         | 6              | COc1ccc(c1)[C@@H]2C3C(=NC(=O)C2)C(=O)OC4CCCC4[C@@H](CC3=O)c5ccc5              |
| ZINC08439805 | 6.03  | 1.23              | -15.32           | 0        | 5           | 0      | 463.599         | 6              | COc1ccc(c1)[C@@H]2[C@@H]3C(=NC(=O)C2)C(=O)OC4CCCC4[C@@H](CC3=O)c5ccc5         |
| ZINC08439805 | 5.85  | -0.29             | -11.51           | 0        | 5           | 0      | 463.599         | 6              | CC1=C([C@@H](C[C@@H]2C(=N1)C[C@@H](CC2=O)c3ccc3)c4ccc4F)C(=O)OCC(C)C          |
| ZINC08439804 | 5.82  | -0.83             | -19.22           | 1        | 8           | 0      | 582             | 12             | COc1ccc(cc1)OCC=C/C=N/NC(=O)CN(c2ccc(c2)C(F)F)F)S(=O)(=O)c3ccc3               |
| ZINC08439803 | 5.95  | -2.84             | -24.56           | 1        | 7           | 0      | 584.041         | 10             | C1ccc(cc1)S(=O)(=O)N(C(=O)N/N=C/c2ccc(cc2)OC3CC3)c4cc(c(c4)C(F)F)F)Cl         |
| ZINC08439802 | 5.85  | -0.34             | -9.19            | 0        | 5           | 0      | 463.599         | 6              | CC1=NC2=C([C@@H](C1C(=O)OCC(C)C)c3ccc3F)C(=O)C[C@@H](C2)C5ccc5                |
| ZINC08439802 | 6.03  | -0.27             | -9.74            | 0        | 5           | 0      | 463.599         | 6              | COc1ccc(c1)[C@@H]2C3C(=NC(=O)C2)C(=O)OC4CCCC4[C@@H](CC3=O)c5ccc5              |
| ZINC08439802 | 6.03  | 0.97              | -11.21           | 0        | 5           | 0      | 463.599         | 6              | COc1ccc(c1)[C@@H]2[C@@H]3C(=NC(=O)C2)C(=O)OC4CCCC4[C@@H](CC3=O)c5ccc5         |
| ZINC08439802 | 5.85  | -0.23             | -11.83           | 0        | 5           | 0      | 463.599         | 6              | CC1=C([C@@H](C[C@@H]2C(=N1)C[C@@H](CC2=O)c3ccc3)c4ccc4F)C(=O)OCC(C)C          |
| ZINC08439801 | 4.78  | -3.4              | -32.23           | 1        | 10          | 0      | 639.052         | 11             | C1ccc(cc1)S(=O)(=O)N(C(=O)N/N=C/c2ccc(cc2)OCC(=O)N3COCOC3)c4ccc(c4)C(F)F)F)Cl |
| ZINC08439800 | 5.85  | -0.24             | -8.73            | 0        | 5           | 0      | 463.599         | 6              | CC1=NC2=C([C@@H](C1C(=O)OCC(C)C)c3ccc3F)C(=O)C[C@@H](C2)C5ccc5                |
| ZINC08439800 | 6.03  | -0.11             | -9.4             | 0        | 5           | 0      | 463.599         | 6              | COc1ccc(c1)[C@@H]2C3C(=NC(=O)C2)C(=O)OC4CCCC4[C@@H](CC3=O)c5ccc5              |
| ZINC08439800 | 6.03  | 1.15              | -11.04           | 0        | 5           | 0      | 463.599         | 6              | COc1ccc(c1)[C@@H]2[C@@H]3C(=NC(=O)C2)C(=O)OC4CCCC4[C@@H](CC3=O)c5ccc5         |
| ZINC08439800 | 5.85  | -0.23             | -11.44           | 0        | 5           | 0      | 463.599         | 6              | CC1=C([C@@H](C[C@@H]2C(=N1)C[C@@H](CC2=O)c3ccc3)c4ccc4F)C(=O)OCC(C)C          |
| ZINC08439799 | 5.84  | -2.3              | -31.58           | 1        | 9           | 0      | 637.08          | 11             | C1ccc(cc1)S(=O)(=O)N(C(=O)N/N=C/c2ccc(cc2)OCC(=O)N3COCOC3)c4ccc(c4)C(F)F)F)Cl |
| ZINC08439798 | 6.63  | -0.14             | -28.61           | 1        | 9           | 0      | 626.053         | 13             | CC(C)COC(=O)C0c1ccc(cc1)/C=N/NC(=O)CN(c2ccc(c2)C(F)F)F)S(=O)(=O)c3ccc3        |

Supplementary Table S2:

Detailed table of XP Docking using Schrodinger's Glide module

| ZINC_ID      | sLogP | ApolarDesolvation | PolarDesolvation | H Donors | H Acceptors | Charge | MolecularWeight | RotatableBonds | SMILES                                                                         |
|--------------|-------|-------------------|------------------|----------|-------------|--------|-----------------|----------------|--------------------------------------------------------------------------------|
| ZINC08439797 | 5.85  | -0.24             | -8.91            | 0        | 5           | 0      | 463.599         | 6              | CC1=NC2=C([C@H](C1C(=O)OC3CCCC3)c4cccc(c4)OC)C(=O)C[C@H](C2)C1c5cccs5          |
| ZINC08439797 | 6.03  | -0.18             | -9.5             | 0        | 5           | 0      | 463.599         | 6              | COc1cccc(c1)[C@@H]2C3C(=NC(=C)C2C(=O)OC4CCCC4)C[C@H](CC3=O)c5cccs5             |
| ZINC08439797 | 6.03  | 1.13              | -10.79           | 0        | 5           | 0      | 463.599         | 6              | COc1cccc(c1)[C@@H]2[C@@H]3C(=NC(=C)C2C(=O)OC4CCCC4)C[C@H](CC3=O)c5cccs5        |
| ZINC08439797 | 5.85  | -0.3              | -11.85           | 0        | 5           | 0      | 463.599         | 6              | CC1=C([C@@H]([C@H]2[C@H]3C(=NC(=O)C2)C(=O)C3)C4CCCC4)OC(=O)C1C5CCCC5           |
| ZINC08439796 | 5.44  | -0.53             | -29.48           | 1        | 9           | 0      | 583.972         | 12             | CCOC(=O)COC1ccc(cc1)/C=N/NC(=O)CN(c2ccc(c2)C(F)(F)F)S(=O)(=O)c3ccc3            |
| ZINC08439795 | 4.95  | -2.01             | -30.37           | 1        | 8           | 0      | 567.973         | 8              | C/C(=N)NC(=O)CN(c1ccc(c1)C(F)(F)F)S(=O)(=O)c2ccc2/c3ccc4c(c3)OCOC4             |
| ZINC08439794 | 4.13  | 0.91              | -15.37           | 0        | 6           | 0      | 461.539         | 5              | CCOC(=O)C1[C@@H](C2=C(C[C@H](CC2=O)c3ccc3)N=C1C)4c5ccccc5c4=O                  |
| ZINC08439794 | 4.13  | 0.57              | -17.32           | 0        | 6           | 0      | 461.539         | 5              | CCOC(=O)C1=C(N=C2C[C@@H](CC(=O)C2[C@H]1c3coc4cccc4c3=O)c5cccs5)C               |
| ZINC08439794 | 4.31  | -0.36             | -14.76           | 0        | 6           | 0      | 461.539         | 5              | CCOC(=O)C1[C@@H](C2C(=NC1=C)C[C@@H](CC2=O)c3ccc3)c4coc5ccccc5c4=O              |
| ZINC08439793 | 6.36  | -3.39             | -23.89           | 1        | 7           | 0      | 617.875         | 9              | CN(C)c1ccc(cc1Br)/C=N/NC(=O)CN(c2ccc(c2)C(F)(F)F)S(=O)(=O)c3ccc3               |
| ZINC08439792 | 4.13  | 0.75              | -14.66           | 0        | 6           | 0      | 461.539         | 5              | CCOC(=O)C1[C@@H](C2=C(C[C@H](CC2=O)c3ccc3)N=C1C)4c5ccccc5c4=O                  |
| ZINC08439792 | 4.13  | 0.65              | -17.28           | 0        | 6           | 0      | 461.539         | 5              | CCOC(=O)C1=C(N=C2C[C@@H](CC(=O)C2[C@H]1c3coc4cccc4c3=O)c5cccs5)C               |
| ZINC08439792 | 4.31  | -0.44             | -14.26           | 0        | 6           | 0      | 461.539         | 5              | CCOC(=O)C1[C@@H](C2C(=NC1=C)C[C@@H](CC2=O)c3ccc3)c4coc5ccccc5c4=O              |
| ZINC08439791 | 6.15  | -3.09             | -25.94           | 1        | 8           | 0      | 618.815         | 8              | c1ccc(cc1)S(=O)(=O)N(CC(=O)N/N=C/c2cc3c(cc2Br)OC3)c4ccc(c4)C(F)(F)F)Cl         |
| ZINC08439790 | 4.13  | 0.89              | -21.67           | 0        | 6           | 0      | 461.539         | 5              | CCOC(=O)C1[C@@H](C2=C(C[C@H](CC2=O)c3ccc3)N=C1C)4c5ccccc5c4=O                  |
| ZINC08439790 | 4.13  | 0.63              | -21.61           | 0        | 6           | 0      | 461.539         | 5              | CCOC(=O)C1=C(N=C2C[C@@H](CC(=O)C2[C@H]1c3coc4cccc4c3=O)c5cccs5)C               |
| ZINC08439790 | 4.31  | -0.37             | -18.32           | 0        | 6           | 0      | 461.539         | 5              | CCOC(=O)C1[C@@H](C2C(=NC1=C)C[C@@H](CC2=O)c3ccc3)c4coc5ccccc5c4=O              |
| ZINC08439789 | 4.78  | -7                | -26.26           | 1        | 9           | 0      | 618.055         | 9              | c1ccc(cc1)S(=O)(=O)N(CC(=O)N2ccc(cc2)S(=O)(=O)N3COC3)c4ccc(c4)C(F)(F)F)Cl      |
| ZINC00189848 | 2.8   | 5.34              | -11.22           | 0        | 5           | 0      | 338.454         | 4              | COc1cccc1N2CCN(CC2)S(=O)(=O)c3ccc3                                             |
| ZINC08439788 | 4.13  | 0.92              | -15.38           | 0        | 6           | 0      | 461.539         | 5              | CCOC(=O)C1[C@@H](C2=C(C[C@H](CC2=O)c3ccc3)N=C1C)4c5ccccc5c4=O                  |
| ZINC08439788 | 4.13  | 0.73              | -17.66           | 0        | 6           | 0      | 461.539         | 5              | CCOC(=O)C1=C(N=C2C[C@@H](CC(=O)C2[C@H]1c3coc4cccc4c3=O)c5cccs5)C               |
| ZINC08439788 | 4.31  | -0.19             | -15.22           | 0        | 6           | 0      | 461.539         | 5              | CCOC(=O)C1[C@@H](C2C(=NC1=C)C[C@@H](CC2=O)c3ccc3)c4coc5ccccc5c4=O              |
| ZINC08439787 | 5.22  | 0.27              | -7.87            | 0        | 4           | 0      | 490.394         | 5              | CCOC(=O)C1[C@@H](C2=C(C[C@H](CC2=O)c3ccc3)N=C1C)4c4c(ccc4F)Br                  |
| ZINC08439787 | 5.22  | -0.08             | -10.33           | 0        | 4           | 0      | 490.394         | 5              | CCOC(=O)C1=C(N=C2C[C@@H](CC(=O)C2[C@H]1c3ccc(cc3F)Br)c4ccc4)C                  |
| ZINC08439787 | 5.4   | -1.14             | -7.97            | 0        | 4           | 0      | 490.394         | 5              | CCOC(=O)C1[C@@H](C2C(=NC1=C)C[C@@H](CC2=O)c3ccc3)c4cc(c4cF)Br                  |
| ZINC0645912  | 4.36  | 0.53              | -14.54           | 2        | 6           | 0      | 441.531         | 6              | Cc1ccc(cc1)N2C[C@@H](CC2=O)C(=O)Nc3ccc3C(=O)Nc4cccc4C                          |
| ZINC0645913  | 4.36  | 0.57              | -14.36           | 2        | 6           | 0      | 441.531         | 6              | Cc1ccc(cc1)N2C[C@@H](CC2=O)C(=O)Nc3ccc3C(=O)Nc4cccc4C                          |
| ZINC08439786 | 5.22  | 0.28              | -7.84            | 0        | 4           | 0      | 490.394         | 5              | CCOC(=O)C1[C@@H](C2=C(C[C@H](CC2=O)c3ccc3)N=C1C)4c4c(ccc4F)Br                  |
| ZINC08439786 | 5.22  | 0                 | -10.12           | 0        | 4           | 0      | 490.394         | 5              | CCOC(=O)C1=C(N=C2C[C@@H](CC(=O)C2[C@H]1c3ccc(ccc3F)Br)c4ccc4)C                 |
| ZINC08439786 | 5.4   | -0.88             | -8.54            | 0        | 4           | 0      | 490.394         | 5              | CCOC(=O)C1[C@@H](C2C(=NC1=C)C[C@@H](CC2=O)c3ccc3)c4cc(c4cF)Br                  |
| ZINC0645910  | 3.83  | 0.91              | -13.92           | 2        | 6           | 0      | 455.558         | 6              | Cc1ccc(cc1)N2C[C@@H](CC2=O)C(=O)Nc3ccc3C(=O)Nc4c(ccc4)C                        |
| ZINC08439785 | 5.22  | 0.04              | -10.45           | 0        | 4           | 0      | 490.394         | 5              | CCOC(=O)C1[C@@H](C2=C(C[C@H](CC2=O)c3ccc3)N=C1C)4c4c(ccc4F)Br                  |
| ZINC08439785 | 5.22  | -0.07             | -11.83           | 0        | 4           | 0      | 490.394         | 5              | CCOC(=O)C1=C(N=C2C[C@@H](CC(=O)C2[C@H]1c3ccc(ccc3F)Br)c4ccc4)C                 |
| ZINC08439785 | 5.4   | -1.1              | -9.71            | 0        | 4           | 0      | 490.394         | 5              | CCOC(=O)C1[C@@H](C2C(=NC1=C)C[C@@H](CC2=O)c3ccc3)c4cc(c4cF)Br                  |
| ZINC0645911  | 3.83  | 1                 | -16.83           | 2        | 6           | 0      | 455.558         | 6              | Cc1ccc(cc1)N2C[C@@H](CC2=O)C(=O)Nc3ccc3C(=O)Nc4c(ccc4)C                        |
| ZINC0645908  | 4.17  | -0.95             | -16.74           | 2        | 6           | 0      | 433.552         | 6              | Cc1ccc(cc1)N2C[C@@H](CC2=O)C(=O)Nc3ccc3C(=O)Nc4CCCC4                           |
| ZINC08439784 | 5.22  | 0.28              | -7.88            | 0        | 4           | 0      | 490.394         | 5              | CCOC(=O)C1[C@@H](C2=C(C[C@H](CC2=O)c3ccc3)N=C1C)4c4c(ccc4F)Br                  |
| ZINC08439784 | 5.22  | 0.1               | -10.12           | 0        | 4           | 0      | 490.394         | 5              | CCOC(=O)C1=C(N=C2C[C@@H](CC(=O)C2[C@H]1c3ccc(cc3F)Br)c4ccc4)C                  |
| ZINC08439784 | 5.4   | -0.77             | -8.71            | 0        | 4           | 0      | 490.394         | 5              | CCOC(=O)C1[C@@H](C2C(=NC1=C)C[C@@H](CC2=O)c3ccc3)c4cc(c4cF)Br                  |
| ZINC0645909  | 4.17  | -0.91             | -16.89           | 2        | 6           | 0      | 433.552         | 6              | Cc1ccc(cc1)N2C[C@@H](CC2=O)C(=O)Nc3ccc3C(=O)Nc4CCCC4                           |
| ZINC08439782 | 3.71  | -1.05             | -10.34           | 0        | 5           | 0      | 443.59          | 8              | CCOCOC(=O)C1[C@@H](C2=C(C[C@H](CC2=O)c3ccc3)N=C1C)4c4ccc4                      |
| ZINC08439782 | 3.71  | -1.35             | -11.57           | 0        | 5           | 0      | 443.59          | 8              | CCOCOC(=O)C1=C(N=C2C[C@@H](CC(=O)C2[C@H]1c3ccc3)c4ccc4)C                       |
| ZINC08439782 | 3.89  | -2.3              | -10.56           | 0        | 5           | 0      | 443.59          | 8              | CCOCOC(=O)C1[C@@H](C2=C(C[C@H](CC2=O)c3ccc3)N=C1C)4c4ccc4                      |
| ZINC0645898  | 3.93  | 10.29             | -15.68           | 2        | 6           | 0      | 439.943         | 5              | c1ccc(c1)C(=O)Nc2ccc(cc2)Nc(=O)[C@@H]3C(=O)N(C3)c4ccc(cc4)Cl                   |
| ZINC08439781 | 3.71  | -1.11             | -8.39            | 0        | 5           | 0      | 443.59          | 8              | CCOCOC(=O)C1[C@@H](C2=C(C[C@H](CC2=O)c3ccc3)N=C1C)4c4ccc4                      |
| ZINC08439781 | 3.71  | -1.21             | -10.62           | 0        | 5           | 0      | 443.59          | 8              | CCOCOC(=O)C1=C(N=C2C[C@@H](CC(=O)C2[C@H]1c3ccc3)c4ccc4)C                       |
| ZINC08439781 | 3.89  | -2.16             | -9.44            | 0        | 5           | 0      | 443.59          | 8              | CCOCOC(=O)C1[C@@H](C2=C(C[C@H](CC2=O)c3ccc3)N=C1C)4c4ccc4                      |
| ZINC0645899  | 3.93  | 10.25             | -12.62           | 2        | 6           | 0      | 439.943         | 5              | c1ccc(c1)C(=O)Nc2ccc(cc2)Nc(=O)[C@@H]3C(=O)N(C3)c4ccc(cc4)Cl                   |
| ZINC08439780 | 3.71  | -1.02             | -8.31            | 0        | 5           | 0      | 443.59          | 8              | CCOCOC(=O)C1[C@@H](C2=C(C[C@H](CC2=O)c3ccc3)N=C1C)4c4ccc4                      |
| ZINC08439780 | 3.71  | -1.23             | -11.21           | 0        | 5           | 0      | 443.59          | 8              | CCOCOC(=O)C1=C(N=C2C[C@@H](CC(=O)C2[C@H]1c3ccc3)c4ccc4)C                       |
| ZINC08439780 | 3.89  | -2.23             | -8.8             | 0        | 5           | 0      | 443.59          | 8              | CCOCOC(=O)C1[C@@H](C2=C(C[C@H](CC2=O)c3ccc3)N=C1C)4c4ccc4                      |
| ZINC02171978 | 5.78  | 1.11              | -18.66           | 2        | 5           | 0      | 457.357         | 7              | Cc1ccc(c1)Nc(=O)COC2c3ccc(cc3)Nc(=O)Nc3ccc(cc3)Cl                              |
| ZINC02171975 | 5.01  | 0.05              | -24.26           | 2        | 7           | 0      | 448.519         | 10             | Cc1ccc(cc1)OCCN(C(=O)C2c3ccc(cc3)Nc(=O)Nc3ccc(cc3)OC)C                         |
| ZINC08439779 | 3.71  | -1.01             | -8.75            | 0        | 5           | 0      | 443.59          | 8              | CCOCOC(=O)C1[C@@H](C2=C(C[C@H](CC2=O)c3ccc3)N=C1C)4c4ccc4                      |
| ZINC08439779 | 3.71  | -1.15             | -10.9            | 0        | 5           | 0      | 443.59          | 8              | CCOCOC(=O)C1=C(N=C2C[C@@H](CC(=O)C2[C@H]1c3ccc3)c4ccc4)C                       |
| ZINC08439779 | 3.89  | -2.15             | -9.52            | 0        | 5           | 0      | 443.59          | 8              | CCOCOC(=O)C1[C@@H](C2C(=NC1=C)C[C@@H](CC2=O)c3ccc3)c4ccc4                      |
| ZINC0645888  | 4.68  | 1.59              | -13.74           | 2        | 7           | 0      | 440.883         | 7              | COc1ccc(c1OC)C(=O)Nc2ccc(cc2)C(=O)Nc3ccc(cc3)F                                 |
| ZINC0645878  | 4.78  | -3.88             | -14.27           | 1        | 5           | 0      | 463.987         | 6              | c1ccc(cc1c2csc(n2)SCC(=O)Nc3ccc(cc3)C1)N4CCOC44                                |
| ZINC08439778 | 4.15  | -0.25             | -17.67           | 0        | 8           | 0      | 539.65          | 9              | CC1=NC2=C([C@@H](C1C(=O)OC[C@H]3CCCC3)c4ccc(c4)OC)OC(=O)C[C@@H](C2)c5cccs5     |
| ZINC08439778 | 4.33  | -0.22             | -16.11           | 0        | 8           | 0      | 539.65          | 9              | COc1ccc(c1OC)C[C@@H]2C3C(=NC(=C)C2C(=O)OC[C@H]4CCCC4)C[C@H](CC3=O)c5cccs5      |
| ZINC08439778 | 4.33  | 1.06              | -20.92           | 0        | 8           | 0      | 539.65          | 9              | COc1ccc(c1OC)C[C@@H]2[C@@H]3C(=NC(=C)C2C(=O)OC[C@H]4CCCC4)C[C@H](CC3=O)c5cccs5 |

Supplementary Table S2:

Detailed table of XP Docking using Schrodinger's Glide module

| ZINC_ID      | xLogP | ApolarDesolvation | PolarDesolvation | H Donors | H Acceptors | Charge | MolecularWeight | RotatableBonds | SMILES                                                                             |
|--------------|-------|-------------------|------------------|----------|-------------|--------|-----------------|----------------|------------------------------------------------------------------------------------|
| ZINC08439778 | 4.15  | -0.5              | -17.88           | 0        | 8           | 0      | 539.65          | 9              | CC1=C([C@H]([C@H]2C(=N1)C[C@H](CC2=O)c3cccs3)c4ccc(c4C(=O)OC)C(=O)OC[C@H]5CCCCO5   |
| ZINC08439777 | 3.45  | 7.91              | -34.77           | 3        | 9           | 0      | 477.517         | 11             | CC(=O)Nc1ccc(cc1)NC(=O)C(=O)c2ccccc2C(=O)NCCO3ccc(cc3)OC                           |
| ZINC08439776 | 3.27  | -5.22             | -22.38           | 2        | 8           | 0      | 493.585         | 9              | c1ccc(cc1)OCCNC(=O)c2ccccc2NC(=O)[C@H]3CCCN3S(=O)(=O)c4ccccc4                      |
| ZINC08439775 | 4.15  | 0.11              | -11.26           | 0        | 8           | 0      | 539.65          | 9              | CC1=NC2=C([C@H]([C1C(=O)OC][C@H]3CCCO3)c4ccc(c4C(=O)OC)OC(=O)C[C@H](C2)c5cccs5     |
| ZINC08439775 | 4.33  | 0.27              | -12.37           | 0        | 8           | 0      | 539.65          | 9              | C0c1ccc(c1OC)OC][C@H]2C3C(=NC(=C)C2C(=O)OC)[C@H]4CCCO4][C@H](CC3=O)c5cccs5         |
| ZINC08439775 | 4.33  | 1.32              | -14.35           | 0        | 8           | 0      | 539.65          | 9              | C0c1ccc(c1OC)OC][C@H]2[C@H]3C(=NC(=C)C2C(=O)OC)[C@H]4CCCO4][C@H](CC3=O)c5cccs5     |
| ZINC08439775 | 4.15  | 0.19              | -14.78           | 0        | 8           | 0      | 539.65          | 9              | CC1=C([C@H]([C@H]2C(=N1)C[C@H](CC2=O)c3cccs3)c4ccc(c4C(=O)OC)C(=O)OC[C@H]5CCCCO5   |
| ZINC08439774 | 3.27  | -5.88             | -23.85           | 2        | 8           | 0      | 493.585         | 9              | c1ccc(cc1)OCCNC(=O)c2ccccc2NC(=O)[C@H]3CCCN3S(=O)(=O)c4ccccc4                      |
| ZINC08439773 | 4.15  | -0.19             | -12.08           | 0        | 8           | 0      | 539.65          | 9              | CC1=NC2=C([C@H]([C1C(=O)OC][C@H]3CCCO3)c4ccc(c4C(=O)OC)C(=O)C[C@H](C2)c5cccs5      |
| ZINC08439773 | 4.33  | -0.04             | -12.66           | 0        | 8           | 0      | 539.65          | 9              | C0c1ccc(c1OC)OC][C@H]2C3C(=NC(=C)C2C(=O)OC)[C@H]4CCCO4][C@H](CC3=O)c5cccs5         |
| ZINC08439773 | 4.33  | 1.12              | -14.05           | 0        | 8           | 0      | 539.65          | 9              | C0c1ccc(c1OC)OC][C@H]2[C@H]3C(=NC(=C)C2C(=O)OC)[C@H]4CCCO4][C@H](CC3=O)c5cccs5     |
| ZINC08439773 | 4.15  | -0.15             | -14.7            | 0        | 8           | 0      | 539.65          | 9              | CC1=C([C@H]([C@H]2C(=N1)C[C@H](CC2=O)c3cccs3)c4ccc(c4C(=O)OC)C(=O)OC[C@H]5CCCCO5   |
| ZINC08439772 | 4.34  | -1.48             | -26.07           | 2        | 7           | 0      | 448.519         | 12             | C0c1ccc(cc1)OCCNC(=O)c2ccccc2OC(=O)NCCc3ccccc3                                     |
| ZINC00645872 | 5.97  | 1.03              | -21.07           | 2        | 6           | 0      | 452.938         | 8              | Cc1c(cccc1)NC(=O)c2ccccc2OC(=O)Nc3ccccc3OC(C)C                                     |
| ZINC08439771 | 4.15  | -0.11             | -11.74           | 0        | 8           | 0      | 539.65          | 9              | CC1=NC2=C([C@H]([C1C(=O)OC][C@H]3CCCO3)c4ccc(c4C(=O)OC)OC(=O)C[C@H](C2)c5cccs5     |
| ZINC08439771 | 4.33  | 0.06              | -11.37           | 0        | 8           | 0      | 539.65          | 9              | C0c1ccc(c1OC)OC][C@H]2C3C(=NC(=C)C2C(=O)OC)[C@H]4CCCO4][C@H](CC3=O)c5cccs5         |
| ZINC08439771 | 4.33  | 1.05              | -18.83           | 0        | 8           | 0      | 539.65          | 9              | C0c1ccc(c1OC)OC][C@H]2[C@H]3C(=NC(=C)C2C(=O)OC)[C@H]4CCCO4][C@H](CC3=O)c5cccs5     |
| ZINC08439771 | 4.15  | 0.16              | -13.27           | 0        | 8           | 0      | 539.65          | 9              | CC1=C([C@H]([C@H]2C(=N1)C[C@H](CC2=O)c3cccs3)c4ccc(c4C(=O)OC)C(=O)OC[C@H]5CCCCO5   |
| ZINC00645865 | 3.88  | -1.21             | -12              | 2        | 6           | 0      | 428.945         | 8              | Cc1c(cccc1)NC(=O)CSc2nnc(n2CC=C)C][C@H](c3ccccc3)O                                 |
| ZINC00645860 | 5.28  | 1.53              | -24.18           | 1        | 6           | 0      | 443.547         | 8              | CN(C)C1ccc(cc1)NC(=O)c2ccccc2OC(=O)NCCc3ccccc3                                     |
| ZINC00630257 | 4.34  | -0.99             | -24.55           | 1        | 6           | 0      | 475.595         | 6              | CC(=O)c1ccc(c1)NC(=O)CSc2nc3c(e4(s3)CCC4)c(=O)n2c5ccccc5                           |
| ZINC08439770 | 4.92  | -0.39             | -23.44           | 2        | 7           | 0      | 448.519         | 11             | CC(C)O1cccc1NC(=O)c2ccccc2OC(=O)NCCO3c3ccccc3                                      |
| ZINC08439769 | 5.96  | 0.49              | -7.56            | 0        | 4           | 0      | 451.563         | 5              | CC1=NC2=C([C@H]([C1C(=O)OC][C@H]3CCCO3)c4ccc(c4)F)C(=O)C[C@H](C2)c5cccs5           |
| ZINC08439769 | 6.14  | 0.55              | -8.16            | 0        | 4           | 0      | 451.563         | 5              | C=C1C([C@H](C2C(=N1)C[C@H](CC2=O)c3cccs3)c4ccc(c4)F)C(=O)OC5CCCC5                  |
| ZINC08439769 | 6.14  | 1.95              | -13.87           | 0        | 4           | 0      | 451.563         | 5              | C=C1C([C@H]([C@H]2C(=N1)C[C@H](CC2=O)c3cccs3)c4ccc(c4)F)C(=O)OC5CCCC5              |
| ZINC08439769 | 5.96  | 0.43              | -10.26           | 0        | 4           | 0      | 451.563         | 5              | CC1=C([C@H]([C@H]2C(=N1)C[C@H](CC2=O)c3cccs3)c4ccc(c4)F)C(=O)OC5CCCC5              |
| ZINC02171959 | 5.21  | 0.87              | -23.16           | 1        | 6           | 0      | 444.531         | 8              | Cc1cccc1OCCNC(=O)c2ccccc2OC(=O)N3CCc4c3ccccc4C                                     |
| ZINC02171957 | 3.29  | -0.15             | -14.17           | 2        | 8           | 0      | 450.491         | 10             | C0c1ccc(cc1OC)OC][C@H]2C3C(=NC(=O)OC)[C@H]4CCCO4][C@H](CC3=O)c5ccccc5C1            |
| ZINC00630249 | 5.33  | -0.54             | -23.11           | 1        | 6           | 0      | 503.649         | 6              | C([C@H]1CCc2c(sc3c2c(=O)n(c(n3)S)CC(=O)Nc4ccc(c4)C(=O)C)c5ccccc5)C1                |
| ZINC08439768 | 7.22  | -1.67             | -10.76           | 2        | 6           | 0      | 460.574         | 13             | CCC1ccc(cc1)OCCNC(=O)[C@H](Cc2ccccc2)NC(=O)OC3ccccc3                               |
| ZINC00630251 | 5.33  | -0.54             | -23.17           | 1        | 6           | 0      | 503.649         | 6              | C([C@H]1CCc2c(sc3c2c(=O)n(c(n3)S)CC(=O)Nc4ccc(c4)C(=O)C)c5ccccc5)C1                |
| ZINC08439767 | 5.96  | 0.48              | -7.23            | 0        | 4           | 0      | 451.563         | 5              | CC1=NC2=C([C@H]([C1C(=O)OC][C@H]3CCCO3)c4ccc(c4)F)C(=O)C[C@H](C2)c5cccs5           |
| ZINC08439767 | 6.14  | 0.61              | -8.83            | 0        | 4           | 0      | 451.563         | 5              | C=C1C([C@H](C2C(=N1)C[C@H](CC2=O)c3cccs3)c4ccc(c4)F)C(=O)OC5CCCC5                  |
| ZINC08439767 | 6.14  | 1.95              | -13.69           | 0        | 4           | 0      | 451.563         | 5              | C=C1C([C@H]([C@H]2C(=N1)C[C@H](CC2=O)c3cccs3)c4ccc(c4)F)C(=O)OC5CCCC5              |
| ZINC08439767 | 5.96  | 0.49              | -10.24           | 0        | 4           | 0      | 451.563         | 5              | CC1=C([C@H]([C@H]2C(=N1)C[C@H](CC2=O)c3cccs3)c4ccc(c4)F)C(=O)OC5CCCC5              |
| ZINC08439766 | 7.22  | -1.67             | -11.31           | 2        | 6           | 0      | 460.574         | 13             | CCC1ccc(cc1)OCCNC(=O)[C@H](Cc2ccccc2)NC(=O)OC3ccccc3                               |
| ZINC08439765 | 4.73  | -0.8              | -20.88           | 1        | 6           | 0      | 467.616         | 7              | CC(=O)c1ccc(c1)NC(=O)CSc2nc3c(e4(s3)CCCC4)c(=O)n2CC=C                              |
| ZINC02171943 | 4.51  | -1.03             | -11.47           | 2        | 5           | 0      | 416.521         | 9              | Cc1cccc1OCCNC(=O)[C@H](Cc2ccccc2)NC(=O)c3ccccc3C                                   |
| ZINC02171941 | 6.16  | 0.46              | -14.15           | 1        | 3           | 0      | 429.566         | 7              | c1ccc(cc1)CSc2ccccc2C(=O)Nc3ccc(cc3)C(=O)c4ccccc4                                  |
| ZINC08439764 | 5.96  | 0.38              | -7.62            | 0        | 4           | 0      | 451.563         | 5              | CC1=NC2=C([C@H]([C1C(=O)OC][C@H]3CCCO3)c4ccc(c4)F)C(=O)C[C@H](C2)c5cccs5           |
| ZINC08439764 | 6.14  | 0.63              | -8.24            | 0        | 4           | 0      | 451.563         | 5              | C=C1C([C@H](C2C(=N1)C[C@H](CC2=O)c3cccs3)c4ccc(c4)F)C(=O)OC5CCCC5                  |
| ZINC08439764 | 6.14  | 1.83              | -15.8            | 0        | 4           | 0      | 451.563         | 5              | C=C1C([C@H]([C@H]2C(=N1)C[C@H](CC2=O)c3cccs3)c4ccc(c4)F)C(=O)OC5CCCC5              |
| ZINC08439764 | 5.96  | 0.52              | -10.32           | 0        | 4           | 0      | 451.563         | 5              | CC1=C([C@H]([C@H]2C(=N1)C[C@H](CC2=O)c3cccs3)c4ccc(c4)F)C(=O)OC5CCCC5              |
| ZINC0630239  | 4.17  | -3.67             | -14.6            | 1        | 6           | 0      | 469.632         | 6              | c1ccc(cc1)n2c(=O)c3c4c(sc3nc2S)CC(=O)N(C)C][C@H]5CCCCO5)CCCC4                      |
| ZINC00645843 | 3.15  | -2.16             | -17.03           | 2        | 7           | 0      | 435.619         | 9              | CC(C)(C)NC(=O)CSc1ncf(n1)c2ccccc2S)CC(=O)N(C)C][C@H]5CCCCO5)CCCC4                  |
| ZINC00630241 | 4.17  | -3.73             | -14.88           | 1        | 6           | 0      | 469.632         | 6              | c1ccc(cc1)n2c(=O)c3c4c(sc3nc2S)CC(=O)N(C)C][C@H]5CCCCO5)CCCC4                      |
| ZINC02171936 | 5.94  | -1.44             | -10.07           | 1        | 4           | 0      | 420.299         | 2              | c1ccc2c(c1)cc(c(n2)C)[C@H]3Nc4ccccc4C(=O)N3c5ccccc5C1                              |
| ZINC08439763 | 5.96  | 0.47              | -7.01            | 0        | 4           | 0      | 451.563         | 5              | CC1=NC2=C([C@H]([C1C(=O)OC][C@H]3CCCO3)c4ccc(c4)F)C(=O)C[C@H](C2)c5cccs5           |
| ZINC08439763 | 6.14  | 0.55              | -8.27            | 0        | 4           | 0      | 451.563         | 5              | C=C1C([C@H](C2C(=N1)C[C@H](CC2=O)c3cccs3)c4ccc(c4)F)C(=O)OC5CCCC5                  |
| ZINC08439763 | 6.14  | 1.7               | -7.5             | 0        | 4           | 0      | 451.563         | 5              | C=C1C([C@H]([C@H]2C(=N1)C[C@H](CC2=O)c3cccs3)c4ccc(c4)F)C(=O)OC5CCCC5              |
| ZINC08439763 | 5.96  | 0.6               | -9.67            | 0        | 4           | 0      | 451.563         | 5              | CC1=C([C@H]([C@H]2C(=N1)C[C@H](CC2=O)c3cccs3)c4ccc(c4)F)C(=O)OC5CCCC5              |
| ZINC02171937 | 5.94  | -1.44             | -10.05           | 1        | 4           | 0      | 420.299         | 2              | c1ccc2c(c1)cc(c(n2)C)[C@H]3Nc4ccccc4C(=O)N3c5ccccc5C1                              |
| ZINC00630237 | 5.06  | -1.31             | -18.76           | 1        | 6           | 0      | 469.632         | 9              | C0c1ccc(cc1)NC(=O)CSc2nc3c(e4(s3)CCCC4)c(=O)n2CC=C                                 |
| ZINC00645842 | 4.57  | 0.76              | -15.1            | 1        | 6           | 0      | 424.884         | 5              | C0c1ccc(cc1OC)OC][C@H]2N3c3ccccc3C(=O)N2c4ccccc4C1                                 |
| ZINC00630228 | 4.7   | -0.47             | -20.49           | 1        | 6           | 0      | 467.616         | 7              | C([C@H]1CCc2c(sc3c2c(=O)n(c(n3)S)CC(=O)Nc4ccc(c4)C(=O)C)CC=C)C1                    |
| ZINC08439762 | 4.77  | -0.5              | -51.05           | 0        | 9           | -1     | 543.643         | 10             | CCSCCOC(=O)C1[C@H](C2=C(C)[C@H](CC2=O)c3cccs3)N=C1C)c4ccc(c4)C(=O)OC(=O)N+([=O])O- |
| ZINC08439762 | 4.77  | -0.86             | -54.25           | 0        | 9           | -1     | 543.643         | 10             | CCSCCOC(=O)C1=C(N=C2C[C@H](CC1=O)C2)[C@H]1c3ccc(c3)OC(=O)N+([=O])O-]c4ccccc4       |
| ZINC08439762 | 4.96  | -1.73             | -50.91           | 0        | 9           | -1     | 543.643         | 10             | CCSCCOC(=O)C1[C@H](C2C(=N1)C[C@H](CC2=O)c3cccs3)c4ccc(c4)C(=O)OC(=O)N+([=O])O-     |
| ZINC08439761 | 5.44  | -5.42             | -13.18           | 1        | 5           | 0      | 426.544         | 4              | CSc1nc2ccc(cc2s1)S(=O)(=O)Nc3ccccc3c4ccccc4c3                                      |
| ZINC00630229 | 4.7   | -0.48             | -20.49           | 1        | 6           | 0      | 467.616         | 7              | C([C@H]1CCc2c(sc3c2c(=O)n(c(n3)S)CC(=O)Nc4ccc(c4)C(=O)C)CC=C)C1                    |
| ZINC08439760 | 5.25  | -0.79             | -10.99           | 0        | 4           | 0      | 446.022         | 6              | Cc1nc(cs1)CSc2nc3c(e4(s3)c4ccc(cc4)C)C(=O)n2CC=C                                   |

**Supplementary Table S2:**  
**Detailed table of XP Docking using Schrodinger's Glide module**

| ZINC_ID      | xLogP | ApolarDesolvation | PolarDesolvation | H Donors | H Acceptors | Charge | MolecularWeight | RotatableBonds | SMILES                                                                                     |
|--------------|-------|-------------------|------------------|----------|-------------|--------|-----------------|----------------|--------------------------------------------------------------------------------------------|
| ZINC08439759 | 4.77  | -0.63             | -54.56           | 0        | 9           | -1     | 543.643         | 10             | CCSCCOC(=O)C1[C@@H](C2=C(C)[C@@H](CC2=O)c3ccc3)N=C1C)c4ccc(c(c4)OC)[O-]]N+[(=O)[O-]        |
| ZINC08439759 | 4.77  | -0.71             | -53.94           | 0        | 9           | -1     | 543.643         | 10             | CCSCCOC(=O)C1=C(N=C2C[C@@H](CC(=O)C2)[C@@H]1c3ccc(c(c3)OC)[O-]]N+[(=O)[O-]]c4ccc4)C        |
| ZINC08439759 | 4.96  | -1.77             | -53.66           | 0        | 9           | -1     | 543.643         | 10             | CCSCCOC(=O)C1[C@@H](C2C=NC1=C)C[C@@H](CC2=O)c3ccc3)c4ccc(c(c4)OC)[O-]]N+[(=O)[O-]          |
| ZINC00630220 | 3.92  | -1.52             | -14.04           | 0        | 6           | 0      | 461.996         | 6              | C=Cc1c(=O)c2c(csc2nc1S)C(=O)N3CCOCC3)c4ccc4c1                                              |
| ZINC00645825 | 4.34  | 1.23              | -17.82           | 1        | 7           | 0      | 458.514         | 8              | COc1cc2cnc(c2cc1OC)C3ccc(c(c3)NC(=O)c4ccc4)OC1OC                                           |
| ZINC08439758 | 5.89  | -0.14             | -42.43           | 1        | 4           | 1      | 442.608         | 6              | COc1ccc(cc1)c2csc(n2)N3CC[NH+](CC3)C(c4ccc4)c5ccc5                                         |
| ZINC08439757 | 4.77  | -0.65             | -55              | 0        | 9           | -1     | 543.643         | 10             | CCSCCOC(=O)C1[C@@H](C2=C(C)[C@@H](CC2=O)c3ccc3)N=C1C)c4ccc(c(c4)OC)[O-]]N+[(=O)[O-]        |
| ZINC08439757 | 4.77  | -0.75             | -57.32           | 0        | 9           | -1     | 543.643         | 10             | CCSCCOC(=O)C1=C(N=C2C[C@@H](CC(=O)C2)[C@@H]1c3ccc(c(c3)OC)[O-]]N+[(=O)[O-]]c4ccc4)C        |
| ZINC08439757 | 4.96  | -1.82             | -56.61           | 0        | 9           | -1     | 543.643         | 10             | CCSCCOC(=O)C1[C@@H](C2C=NC1=C)C[C@@H](CC2=O)c3ccc3)c4ccc(c(c4)OC)[O-]]N+[(=O)[O-]          |
| ZINC00630219 | 4.21  | -3.01             | -13.92           | 1        | 6           | 0      | 476.023         | 8              | C=Cc1c(=O)c2c(csc2nc1S)C(=O)N[C@@H]3CCO3)c4ccc4c1                                          |
| ZINC08439756 | 4.55  | -2.59             | -14.95           | 3        | 6           | 0      | 447.579         | 9              | CC(=O)N[C@@H](Cc1c[nH]c2c1cccc2)C(=O)NCCOc3ccc(cc3)C4CCCC4                                 |
| ZINC00630211 | 5.11  | -1.23             | -27.76           | 1        | 6           | 0      | 431.546         | 6              | c1ccc2c(c1)nc(s2)c3ccc(cc3)NC(=O)CCSc4nnc5n4ccc5                                           |
| ZINC08439755 | 4.77  | -0.46             | -51.02           | 0        | 9           | -1     | 543.643         | 10             | CCSCCOC(=O)C1[C@@H](C2=C(C)[C@@H](CC2=O)c3ccc3)N=C1C)c4ccc(c(c4)OC)[O-]]N+[(=O)[O-]        |
| ZINC08439755 | 4.77  | -0.82             | -56.6            | 0        | 9           | -1     | 543.643         | 10             | CCSCCOC(=O)C1=C(N=C2C[C@@H](CC(=O)C2)[C@@H]1c3ccc(c(c3)OC)[O-]]N+[(=O)[O-]]c4ccc4)C        |
| ZINC08439755 | 4.96  | -1.74             | -52.7            | 0        | 9           | -1     | 543.643         | 10             | CCSCCOC(=O)C1[C@@H](C2C=NC1=C)C[C@@H](CC2=O)c3ccc3)c4ccc(c(c4)OC)[O-]]N+[(=O)[O-]          |
| ZINC08439754 | 4.55  | -2.81             | -18.25           | 3        | 6           | 0      | 447.579         | 9              | CC(=O)N[C@@H](Cc1c[nH]c2c1cccc2)C(=O)NCCOc3ccc(cc3)C4CCCC4                                 |
| ZINC08439753 | 6.99  | -2.38             | -20.16           | 1        | 4           | 0      | 455.608         | 6              | Cc1cc(nc2c1cccc2)SCC(=O)Nc3ccc(cc3)4nnc5ccc5s4                                             |
| ZINC00630201 | 5.87  | 1.12              | -20.56           | 1        | 5           | 0      | 436.606         | 7              | CC(C)[C]c1ccc(cc1)NC(=O)CCSc2nnc3n2c(cs3)c4ccc4                                            |
| ZINC02502423 | 2.59  | 5.53              | -23.63           | 3        | 8           | 0      | 427.511         | 5              | Cc1c2ccc2n3c1nnc3S)C(=O)N4ccc(cc4)S(=O)(=O)N                                               |
| ZINC02171881 | 1.15  | -0.19             | -18.51           | 2        | 10          | 0      | 490.574         | 9              | c1ccc(cc1)n2c(nnc2S)C#N)[C@@H]([C@H]1c3nnc(n3c4ccc4)SCC#N)O                                |
| ZINC08439752 | 5.18  | 0.09              | -50.9            | 0        | 9           | -1     | 511.576         | 8              | CC1=NC2=C([C@@H](C1C(=O)O)C)C3ccc(c(c3)OC)[O-]]N+[(=O)[O-]]C(=O)C[C@@H](C2)c4ccc4          |
| ZINC08439752 | 5.18  | 0.32              | -50.74           | 0        | 9           | -1     | 511.576         | 8              | CC(C)COC(=O)C1[C@@H](C2C=NC1=C)C[C@@H](CC2=O)c3ccc3)c4ccc(c(c4)OC)[O-]]N+[(=O)[O-]         |
| ZINC08439752 | 5.18  | 1.31              | -50.89           | 0        | 9           | -1     | 511.576         | 8              | CC(C)COC(=O)C1[C@@H](C2C=NC1=C)C[C@@H](CC2=O)c3ccc3)c4ccc(c(c4)OC)[O-]]N+[(=O)[O-]         |
| ZINC08439752 | 5     | 0.2               | -52.98           | 0        | 9           | -1     | 511.576         | 8              | CC1=C([C@@H]([C@H]2C=N1)C)C[C@@H](CC2=O)c3ccc3)c4ccc(c(c4)OC)[O-]]N+[(=O)[O-]]C(=O)OCC(C)C |
| ZINC02171879 | 1.15  | -0.29             | -18.53           | 2        | 10          | 0      | 490.574         | 9              | c1ccc(cc1)n2c(nnc2S)C#N)[C@@H]([C@H]1c3nnc(n3c4ccc4)SCC#N)O                                |
| ZINC00630196 | 4.9   | -0.17             | -21.95           | 1        | 6           | 0      | 444.969         | 7              | COc1ccc(cc1)NC(=O)CCSc2nnc3n2c(cs3)c4ccc(cc4)C                                             |
| ZINC02171875 | 5.13  | -0.43             | -12.65           | 2        | 5           | 0      | 450.538         | 9              | c1ccc(cc1)C(c2cccc2)C(=O)Nc3ccc3C(=O)NCCOc4ccc4                                            |
| ZINC00630191 | 4.74  | 11.36             | -14.53           | 1        | 5           | 0      | 418.906         | 5              | c1ccc(cc1)c2csc3n2c(mn3)S)C(=O)Nc4ccc(cc4)F)C                                              |
| ZINC08439751 | 5     | -0.02             | -54.12           | 0        | 9           | -1     | 511.576         | 8              | CC1=NC2=C([C@@H](C1C(=O)O)C)C3ccc(c(c3)OC)[O-]]N+[(=O)[O-]]C(=O)C[C@@H](C2)c4ccc4          |
| ZINC08439751 | 5.18  | 1.29              | -57.68           | 0        | 9           | -1     | 511.576         | 8              | CC(C)COC(=O)C1[C@@H](C2C=NC1=C)C[C@@H](CC2=O)c3ccc3)c4ccc(c(c4)OC)[O-]]N+[(=O)[O-]         |
| ZINC08439751 | 5.18  | 0.05              | -55.43           | 0        | 9           | -1     | 511.576         | 8              | CC(C)COC(=O)C1[C@@H](C2C=NC1=C)C[C@@H](CC2=O)c3ccc3)c4ccc(c(c4)OC)[O-]]N+[(=O)[O-]         |
| ZINC08439751 | 5     | 0.09              | -56.62           | 0        | 9           | -1     | 511.576         | 8              | CC1=C([C@@H]([C@H]2C=N1)C)C[C@@H](CC2=O)c3ccc3)c4ccc(c(c4)OC)[O-]]N+[(=O)[O-]]C(=O)OCC(C)C |
| ZINC00381968 | 3.73  | 7.03              | -9.26            | 0        | 3           | 0      | 338.226         | 2              | c1ccc(cc1)S(=O)(=O)N2CCc3c2ccc(c3)Br                                                       |
| ZINC00630190 | 5.38  | -2.31             | -10.05           | 1        | 4           | 0      | 367.47          | 6              | COc1ccc(cc1)NS(=O)(=O)C2ccc(cc2)C3ccc(cc3)C                                                |
| ZINC02171123 | 2.79  | 7.55              | -9.94            | 1        | 4           | 0      | 297.354         | 8              | c1ccc(cc1)C(=O)CCC(=O)NCCOc2ccc2                                                           |
| ZINC00147704 | 3.06  | -4.43             | -13.34           | 1        | 5           | 0      | 343.763         | 4              | c1ccc2c(c1)CNS(=O)(=O)c3ccc(c(c3)F)OC2                                                     |
| ZINC08439750 | 5     | 0.07              | -54.49           | 0        | 9           | -1     | 511.576         | 8              | CC1=NC2=C([C@@H](C1C(=O)O)C)C3ccc(c(c3)OC)[O-]]N+[(=O)[O-]]C(=O)C[C@@H](C2)c4ccc4          |
| ZINC08439750 | 5.18  | 0.21              | -52.51           | 0        | 9           | -1     | 511.576         | 8              | CC(C)COC(=O)C1[C@@H](C2C=NC1=C)C[C@@H](CC2=O)c3ccc3)c4ccc(c(c4)OC)[O-]]N+[(=O)[O-]         |
| ZINC08439750 | 5.18  | 1.36              | -58.13           | 0        | 9           | -1     | 511.576         | 8              | CC(C)COC(=O)C1[C@@H](C2C=NC1=C)C[C@@H](CC2=O)c3ccc3)c4ccc(c(c4)OC)[O-]]N+[(=O)[O-]         |
| ZINC08439750 | 5     | 0.13              | -53.12           | 0        | 9           | -1     | 511.576         | 8              | CC1=C([C@@H]([C@H]2C=N1)C)C[C@@H](CC2=O)c3ccc3)c4ccc(c(c4)OC)[O-]]N+[(=O)[O-]]C(=O)OCC(C)C |
| ZINC04112603 | 3.3   | -1.66             | -57.18           | 1        | 6           | 1      | 429.44          | 5              | c1ccc(cc1)S(=O)(=O)N2CC[NH+](CC2)C3ccc4c(c3)OC4)C(F)F                                      |
| ZINC00645788 | 4.4   | -0.55             | -11.15           | 2        | 6           | 0      | 436.533         | 8              | COOC(=O)c1c(csc1NC(=O)c2ccc(cc2)C)C(=O)NCC3ccc3)C                                          |
| ZINC13545842 | 4.64  | 10.58             | -18.95           | 2        | 5           | 0      | 436.986         | 3              | CC(=O)Oc1cc2c(cc1C)C[C@@H](C2)C(C)C(=O)N3)C(C)C)c4ccc4                                     |
| ZINC13545838 | 4.64  | 10.06             | -18.69           | 2        | 5           | 0      | 436.986         | 3              | CC(=O)Oc1cc2c(cc1C)C[C@@H](C2)C(C)C(=O)N3)C(C)C)c4ccc4                                     |
| ZINC01013300 | 4.99  | -0.81             | -19.48           | 1        | 7           | 0      | 457.559         | 5              | Cc1ccc(c(c1)C)NC(=O)CCSc2nnc3c2c(cc3o2)n4nnc5ccc5n4)C                                      |
| ZINC08439749 | 5     | 0.2               | -52.19           | 0        | 9           | -1     | 511.576         | 8              | CC1=NC2=C([C@@H](C1C(=O)O)C)C3ccc(c(c3)OC)[O-]]N+[(=O)[O-]]C(=O)C[C@@H](C2)c4ccc4          |
| ZINC08439749 | 5.18  | 0.23              | -51.92           | 0        | 9           | -1     | 511.576         | 8              | CC(C)COC(=O)C1[C@@H](C2C=NC1=C)C[C@@H](CC2=O)c3ccc3)c4ccc(c(c4)OC)[O-]]N+[(=O)[O-]         |
| ZINC08439749 | 5.18  | 1.44              | -52.89           | 0        | 9           | -1     | 511.576         | 8              | CC(C)COC(=O)C1[C@@H](C2C=NC1=C)C[C@@H](CC2=O)c3ccc3)c4ccc(c(c4)OC)[O-]]N+[(=O)[O-]         |
| ZINC08439749 | 5     | -0.03             | -54.81           | 0        | 9           | -1     | 511.576         | 8              | CC1=C([C@@H]([C@H]2C=N1)C)C[C@@H](CC2=O)c3ccc3)c4ccc(c(c4)OC)[O-]]N+[(=O)[O-]]C(=O)OCC(C)C |
| ZINC13545844 | 4.64  | 10.16             | -16.33           | 2        | 5           | 0      | 436.986         | 3              | CC(=O)Oc1cc2c(cc1C)C[C@@H](C2)C(C)C(=O)N3)C(C)C)c4ccc4                                     |
| ZINC01013299 | 6.25  | -0.37             | -18.92           | 0        | 6           | 0      | 450.523         | 5              | Cc1ccc2c(c1)n3n4ccc4n3)oc(n2)S)C(=O)c5ccc6ccc6cc5                                          |
| ZINC13545840 | 4.64  | 10.57             | -17.95           | 2        | 5           | 0      | 436.986         | 3              | CC(=O)Oc1cc2c(cc1C)C[C@@H](C2)C(C)C(=O)N3)C(C)C)c4ccc4                                     |
| ZINC02171098 | 6.36  | 1.6               | -12.53           | 0        | 3           | 0      | 418.521         | 3              | c1ccc(cc1)n2c(=O)c3ccc3n2S)C4c5ccc5c6c4ccc6                                                |
| ZINC00630103 | 4.75  | 6.28              | -18.78           | 0        | 7           | 0      | 478.541         | 7              | CC(=O)Oc1ccc2c(c1)O[C@@H]3CC[C@@H]3C24CCCC4)c5ccc(cc5)OC(=O)C)OC(=O)C                      |
| ZINC08439748 | 5.47  | 0.94              | -10.83           | 0        | 7           | 0      | 466.559         | 7              | CC1=NC2=C([C@@H](C1C(=O)O)C)C3ccc(c(c3)OC)[O-]]N+[(=O)[O-]]C(=O)C[C@@H](C2)c4ccc4          |
| ZINC08439748 | 5.66  | 1.17              | -11.29           | 0        | 7           | 0      | 466.559         | 7              | CC(C)COC(=O)C1[C@@H](C2C=NC1=C)C[C@@H](CC2=O)c3ccc3)c4ccc(c(c4)OC)[O-]]N+[(=O)[O-]         |
| ZINC08439748 | 5.66  | 2.39              | -19.72           | 0        | 7           | 0      | 466.559         | 7              | CC(C)COC(=O)C1[C@@H](C2C=NC1=C)C[C@@H](CC2=O)c3ccc3)c4ccc(c(c4)OC)[O-]]N+[(=O)[O-]         |
| ZINC08439748 | 5.47  | 1.05              | -13.19           | 0        | 7           | 0      | 466.559         | 7              | CC1=C([C@@H]([C@H]2C=N1)C)C[C@@H](CC2=O)c3ccc3)c4ccc(c(c4)OC)[O-]]N+[(=O)[O-]]C(=O)OCC(C)C |
| ZINC08439747 | 3.23  | -3.63             | -16.2            | 1        | 6           | 0      | 430.86          | 4              | Cc1ccc(cc1)S(=O)(=O)N2CCOCC2)NC(=O)c3ccc(cc3)F)F                                           |
| ZINC00630102 | 4.75  | 5.72              | -20.06           | 0        | 7           | 0      | 478.541         | 7              | CC(=O)Oc1ccc2c(c1)O[C@@H]3(C)C[C@@H]3C24CCCC4)c5ccc(cc5)OC(=O)C)OC(=O)C                    |
| ZINC08439746 | 6.3   | -2.66             | -12.68           | 2        | 5           | 0      | 434.561         | 11             | c1ccc(cc1)C[C@@H](C(=O)NCCSc2ccc2)NC(=O)OCC3ccc3                                           |







**Supplementary Table S2:**  
**Detailed table of XP Docking using Schrodinger's Glide module**

| ZINC_ID      | stLogP | ApolarDesolvation | PolarDesolvation | H Donors | H Acceptors | Charge | MolecularWeight | RotatableBonds | SMILES                                                                                      |
|--------------|--------|-------------------|------------------|----------|-------------|--------|-----------------|----------------|---------------------------------------------------------------------------------------------|
| ZINC08439681 | 6.45   | 2.9               | -18.57           | 0        | 6           | 0      | 492.575         | 8              | Cc1cccc(c1)N2[C@@H]([C@@H]([C@H](C2=O)O)c3cccc3)N(c4cccc(c4)C)C(=O)C0c5cccc5                |
| ZINC02170910 | 2.17   | 6.71              | -23.68           | 1        | 6           | 0      | 358.419         | 7              | Cc1cccc(c1)OCCNC2=NS(=O)=O)c3c2cccc3                                                        |
| ZINC08439680 | 5.86   | -3.22             | -14.53           | 2        | 7           | 0      | 609.571         | 8              | Cc1ccc(s1)[C@@H]2C(C=NC(=C2)O)Nc3cccc3O)C)SCC(=O)Nc4ccc(cc4)Br)C#N                          |
| ZINC08439680 | 5.48   | -3.26             | -16.97           | 2        | 7           | 0      | 609.571         | 8              | Cc1ccc(s1)[C@@H]2C(C=NC(=C2)O)Nc3cccc3O)C)SCC(=O)Nc4ccc(cc4)Br)C)C(=O)Nc4cccc4O             |
| ZINC0643427  | 5.16   | 0.81              | -12.1            | 2        | 5           | 0      | 436.511         | 7              | COc1cccc1NC(=O)c2cccc2NC(=O)C(c3cccc3)c4cccc4                                               |
| ZINC08439679 | 6.45   | 2.94              | -18.96           | 0        | 6           | 0      | 492.575         | 8              | Cc1cccc(c1)N2[C@@H]([C@@H]([C@H](C2=O)O)c3cccc3)N(c4cccc(c4)C)C(=O)C0c5cccc5                |
| ZINC08439678 | 5.86   | -3.28             | -15.07           | 2        | 7           | 0      | 609.571         | 8              | Cc1ccc(s1)[C@@H]2C(C=NC(=C2)O)Nc3cccc3O)C)SCC(=O)Nc4ccc(cc4)Br)C#N                          |
| ZINC08439678 | 5.48   | -3.16             | -16.51           | 2        | 7           | 0      | 609.571         | 8              | Cc1ccc(s1)[C@@H]2C(C=NC(=C2)O)Nc3cccc3O)C)SCC(=O)Nc4ccc(cc4)Br)C)C(=O)Nc4cccc4O             |
| ZINC08439677 | 6.45   | 3.12              | -21.12           | 0        | 6           | 0      | 492.575         | 8              | Cc1cccc(c1)N2[C@@H]([C@@H]([C@H](C2=O)O)c3cccc3)N(c4cccc(c4)C)C(=O)C0c5cccc5                |
| ZINC0643426  | 5.63   | 0.7               | -19.85           | 1        | 8           | 0      | 542.595         | 4              | Cc1cccc(c1)N2[C@@H]([C@@H]([C@H](C2=O)O)c3cccc3)N(c4cccc(c4)C)C(=O)C0c5cccc5                |
| ZINC08439676 | 5.05   | -2.52             | -15.11           | 2        | 7           | 0      | 530.675         | 8              | Cc1ccc(s1)[C@@H]2C(C=NC(=C2)O)Nc3cccc3O)C)SCC(=O)Nc4cccc4C#N                                |
| ZINC08439676 | 4.67   | -2.41             | -16.87           | 2        | 7           | 0      | 530.675         | 8              | Cc1ccc(s1)[C@@H]2C(C=NC(=C2)O)Nc3cccc3O)C)SCC(=O)Nc4cccc4O                                  |
| ZINC08439675 | 5.71   | 2.85              | -22.86           | 0        | 8           | 0      | 524.573         | 10             | COc1ccc(cc1)N2[C@@H]([C@@H]([C@H](C2=O)O)c3cccc3)N(c4ccc(cc4)O)C)C(=O)C0c5cccc5             |
| ZINC02170897 | 8.76   | 2.12              | -9.33            | 0        | 3           | 0      | 497.063         | 7              | CCc1nc(s1)N(c2ccc3cccc3c2)C(=O)CC4CCCC4c5ccc(cc5)C                                          |
| ZINC08439674 | 5.71   | 2.49              | -20.23           | 0        | 8           | 0      | 524.573         | 10             | COc1ccc(cc1)N2[C@@H]([C@@H]([C@H](C2=O)O)c3cccc3)N(c4ccc(cc4)O)C)C(=O)C0c5cccc5             |
| ZINC08439673 | 5.05   | -2.51             | -15.02           | 2        | 7           | 0      | 530.675         | 8              | Cc1ccc(s1)[C@@H]2C(C=NC(=C2)O)Nc3cccc3O)C)SCC(=O)Nc4cccc4C#N                                |
| ZINC08439673 | 4.67   | -2.48             | -17.01           | 2        | 7           | 0      | 530.675         | 8              | Cc1ccc(s1)[C@@H]2C(C=NC(=C2)O)Nc3cccc3O)C)SCC(=O)Nc4cccc4O                                  |
| ZINC02170894 | 7.34   | 2.84              | -11.45           | 0        | 4           | 0      | 456.611         | 8              | CCc1c(nc(s1)N(c2cccc2)C)C(=O)C3cccc3c4ccc(cc4)O                                             |
| ZINC08439672 | 5.71   | 2.12              | -20.9            | 0        | 8           | 0      | 524.573         | 10             | COc1ccc(cc1)N2[C@@H]([C@@H]([C@H](C2=O)O)c3cccc3)N(c4ccc(cc4)O)C)C(=O)C0c5cccc5             |
| ZINC08439671 | 9.37   | -2.84             | -9.59            | 1        | 3           | 0      | 441.681         | 15             | CCCCCCCCCCCCNS(=O)=O)c1ccc-2c(c1)Cc3c2ccc3                                                  |
| ZINC08439670 | 5.71   | 2.84              | -22.84           | 0        | 8           | 0      | 524.573         | 10             | COc1ccc(cc1)N2[C@@H]([C@@H]([C@H](C2=O)O)c3cccc3)N(c4ccc(cc4)O)C)C(=O)C0c5cccc5             |
| ZINC08439669 | 4.93   | 1.89              | -12.52           | 0        | 7           | 0      | 455.551         | 10             | CCOCOC(=O)C1[C@@H](C2=C(C(C2=O)C)N=C1)C3ccc(cc3)C(=O)O                                      |
| ZINC08439669 | 4.93   | 1.54              | -14.56           | 0        | 7           | 0      | 455.551         | 10             | CCOCOC(=O)C1=C(N=C2CC(=O)C2)C1c3ccc(cc3)C(=O)O                                              |
| ZINC08439669 | 5.11   | 0.66              | -12.89           | 0        | 7           | 0      | 455.551         | 10             | CCOCOC(=O)C1[C@@H](C2=C(NC1=O)C)C(C2=O)C)C3ccc(cc3)C(=O)O                                   |
| ZINC02170889 | 4.75   | 0.91              | -10.6            | 0        | 6           | 0      | 453.589         | 6              | Cc1ccc(cc1)N2[C@@H]([C@@H]([C@H](C2=O)O)c3cccc3)N(c4ccc(cc4)O)C)C(=O)C                      |
| ZINC08439668 | 5.95   | -2.12             | -13.91           | 0        | 6           | 0      | 484.577         | 7              | Cc1ccc(cc1)S(=O)(=O)Nc2cccc2[C@@H]3[C@@H]([C@H](C2=O)O)c3cccc3)N(c4ccc(cc4)O)C)C(=O)O       |
| ZINC08439667 | 4.93   | 1.93              | -10.84           | 0        | 7           | 0      | 455.551         | 10             | CCOCOC(=O)C1[C@@H](C2=C(C(C2=O)C)N=C1)C3ccc(cc3)C(=O)O                                      |
| ZINC08439667 | 4.93   | 2.01              | -13.74           | 0        | 7           | 0      | 455.551         | 10             | CCOCOC(=O)C1=C(N=C2CC(=O)C2)C1c3ccc(cc3)C(=O)O                                              |
| ZINC08439667 | 5.11   | 1.1               | -11.47           | 0        | 7           | 0      | 455.551         | 10             | CCOCOC(=O)C1[C@@H](C2=C(NC1=O)C)C(C2=O)C)C3ccc(cc3)C(=O)O                                   |
| ZINC02170892 | 4.75   | 1.2               | -11.42           | 0        | 6           | 0      | 453.589         | 6              | Cc1ccc(cc1)N2[C@@H]([C@@H]([C@H](C2=O)O)c3cccc3)N(c4ccc(cc4)O)C)C(=O)O                      |
| ZINC08439666 | 5.95   | -1.52             | -14.74           | 0        | 6           | 0      | 484.577         | 7              | Cc1ccc(cc1)S(=O)(=O)Nc2cccc2[C@@H]3[C@@H]([C@H](C2=O)O)c3cccc3)N(c4ccc(cc4)O)C)C(=O)O       |
| ZINC02170886 | 8.18   | 1.65              | -13.96           | 0        | 3           | 0      | 459.442         | 5              | CCc1c(nc(s1)N(c2cccc2)C)C(=O)C3cccc3c4ccc(cc4)O                                             |
| ZINC08439665 | 6.8    | -1.53             | -14.34           | 0        | 6           | 0      | 512.631         | 7              | Cc1ccc(cc1)S(=O)(=O)Nc2cccc2[C@@H]3[C@@H]([C@H](C2=O)O)c3cccc3)N(c4ccc(cc4)O)C)C(=O)O       |
| ZINC08439664 | 6.8    | 0.38              | -21.15           | 0        | 6           | 0      | 512.631         | 7              | Cc1ccc(cc1)S(=O)(=O)Nc2cccc2[C@@H]3[C@@H]([C@H](C2=O)O)c3cccc3)N(c4ccc(cc4)O)C)C(=O)O       |
| ZINC08439663 | 6.69   | -0.14             | -12.8            | 2        | 4           | 0      | 478.636         | 7              | c1ccc(cc1)C(C(=O)N)c2ccc(cc2)N(C)C3C4C5CC(C3)C(C5)C4)c6cccc6                                |
| ZINC08439662 | 3.56   | 1.84              | -13.3            | 0        | 7           | 0      | 467.543         | 7              | CC1=NC2=C(C(C@H)1C)C(=O)O)C3ccc(cc3)O)C(=O)C)C(=O)C)C@H(C2)4cccc4                           |
| ZINC08439662 | 3.74   | 1.9               | -14.35           | 0        | 7           | 0      | 467.543         | 7              | CC1=O)C1ccc(cc1)O)C@H2C3C(=NC(=O)C)C2(=O)O)C)C)C@H(C3)4cccc4                                |
| ZINC08439662 | 3.74   | 3.23              | -15.33           | 0        | 7           | 0      | 467.543         | 7              | CC1=O)C1ccc(cc1)O)C@H2C3C(=NC(=O)C)C2(=O)O)C)C)C@H(C3)4cccc4                                |
| ZINC08439662 | 3.56   | 1.78              | -16.9            | 0        | 7           | 0      | 467.543         | 7              | CC1=C(C@H)1C@H([C@@H]2C(=N1)C)C@H(C2=O)O)c3cccc3)N(c4ccc(cc4)O)C)C(=O)O                     |
| ZINC02170874 | 7.44   | 2.28              | -13.17           | 0        | 5           | 0      | 497.664         | 9              | Cn1c(mnc1)S(=O)(=O)c2ccc(cc2)c3ccc(cc3)O)C4CCCC4                                            |
| ZINC08439659 | 3.56   | 1.85              | -14.63           | 0        | 7           | 0      | 467.543         | 7              | CC1=NC2=C(C(C@H)1C)C(=O)O)C3ccc(cc3)O)C(=O)C)C(=O)C)C@H(C2)4cccc4                           |
| ZINC08439659 | 3.74   | 2.01              | -14.37           | 0        | 7           | 0      | 467.543         | 7              | CC1=O)C1ccc(cc1)O)C@H2C3C(=NC(=O)C)C2(=O)O)C)C)C@H(C3)4cccc4                                |
| ZINC08439659 | 3.74   | 3.32              | -23.63           | 0        | 7           | 0      | 467.543         | 7              | CC1=O)C1ccc(cc1)O)C@H2C3C(=NC(=O)C)C2(=O)O)C)C)C@H(C3)4cccc4                                |
| ZINC08439659 | 3.56   | 1.9               | -15.96           | 0        | 7           | 0      | 467.543         | 7              | CC1=C(C(C@H)1C)C@H([C@@H]2C(=N1)C)C@H(C2=O)O)c3cccc3)N(c4ccc(cc4)O)C)C(=O)O                 |
| ZINC08439657 | 7.11   | 0.13              | -15.36           | 2        | 7           | 0      | 571.464         | 6              | Cc1c(c(n1)c2cccc2)O)C(c3ccc(cc3)c4ccc(cc4)C)1c5(nnc5)O)c6cccc6)C                            |
| ZINC02170872 | 5.44   | 1.87              | -10.77           | 0        | 7           | 0      | 483.615         | 8              | CCOC(=O)C1=C(N(C)C)N(C)C(S2)C(=O)O)C3ccc(cc3)C)C4CCCC4                                      |
| ZINC02170870 | 7.12   | 3.28              | -11.59           | 0        | 6           | 0      | 466.603         | 11             | CCc1c(nc(s1)N(c2ccc(cc2)C)C(=O)O)C)C3ccc(cc3)O)C                                            |
| ZINC08439655 | 4.64   | -1.5              | -20.82           | 0        | 5           | 0      | 476.642         | 5              | CC1([C@@H]2C)C@H13CS(=O)N1N(C@H)3C2)C@H4(C)C@H(N(C4=O)C5cccc5)/C=C/c6cccc6)Br               |
| ZINC08439654 | 3.56   | 1.77              | -13.86           | 0        | 7           | 0      | 467.543         | 7              | CC1=NC2=C(C(C@H)1C)C(=O)O)C3ccc(cc3)O)C(=O)C)C(=O)C)C@H(C2)4cccc4                           |
| ZINC08439654 | 3.74   | 1.89              | -14.47           | 0        | 7           | 0      | 467.543         | 7              | CC(=O)O)C1ccc(cc1)O)C@H2C3C(=NC(=O)C)C2(=O)O)C)C)C@H(C3)4cccc4                              |
| ZINC08439654 | 3.74   | 3.01              | -15.24           | 0        | 7           | 0      | 467.543         | 7              | CC(=O)O)C1ccc(cc1)O)C@H2C3C(=NC(=O)C)C2(=O)O)C)C)C@H(C3)4cccc4                              |
| ZINC08439654 | 3.56   | 1.9               | -16.19           | 0        | 7           | 0      | 467.543         | 7              | CC1=C(C@H)1C@H([C@@H]2C(=N1)C)C@H(C2=O)O)c3cccc3)N(c4ccc(cc4)O)C)C(=O)O                     |
| ZINC08439653 | 4.58   | -1.72             | -46.84           | 3        | 8           | 1      | 574.455         | 4              | Cc1ccc(cc1)NC(=O)CN2c3cccc3[C@@H]4(C2=O)C)C@H5(C)C@H([C@@H]([NH2+4]C)C(=O)N(C5=O)c6cccc6)Br |
| ZINC08439652 | 5.2    | -0.7              | -21.01           | 0        | 5           | 0      | 490.669         | 5              | C(C@H)1C1ccc(c1)N2[C@@H]([C@@H]([C@H](C2=O)O)c3cccc3)N(c4ccc(cc4)O)C)C(=O)O                 |
| ZINC08439651 | 4.58   | -1.05             | -58.16           | 3        | 8           | 1      | 574.455         | 4              | Cc1ccc(cc1)NC(=O)CN2c3cccc3[C@@H]4(C2=O)C)C@H5(C)C@H([C@@H]([NH2+4]C)C(=O)N(C5=O)c6cccc6)Br |
| ZINC0629977  | 3.9    | 0.3               | -13.6            | 1        | 6           | 0      | 426.538         | 9              | CCOC1ccc(cc1)O)C)C(=O)Nc2ccc(cc2)c3ccc(n3)C                                                 |
| ZINC0387112  | 3.72   | 8.25              | -10.27           | 1        | 3           | 0      | 300.427         | 3              | Cc1nc(cs1)c2ccc(cc2)NC(=O)C3CCCC3                                                           |
| ZINC08439649 | 3.56   | 1.86              | -14.1            | 0        | 7           | 0      | 467.543         | 7              | CC1=NC2=C(C(C@H)1C)C(=O)O)C3ccc(cc3)O)C(=O)C)C(=O)C)C@H(C2)4cccc4                           |
| ZINC08439649 | 3.74   | 1.92              | -14.29           | 0        | 7           | 0      | 467.543         | 7              | CC(=O)O)C1ccc(cc1)O)C@H2C3C(=NC(=O)C)C2(=O)O)C)C)C@H(C3)4cccc4                              |
| ZINC08439649 | 3.74   | 3.09              | -17.15           | 0        | 7           | 0      | 467.543         | 7              | CC(=O)O)C1ccc(cc1)O)C@H2C3C(=NC(=O)C)C2(=O)O)C)C)C@H(C3)4cccc4                              |
| ZINC08439649 | 3.56   | 1.81              | -15.79           | 0        | 7           | 0      | 467.543         | 7              | CC1=C(C(C@H)1C)C@H([C@@H]2C(=N1)C)C@H(C2=O)O)c3cccc3)N(c4ccc(cc4)O)C)C(=O)O                 |

Supplementary Table S2:

Detailed table of XP Docking using Schrodinger's Glide module

| ZINC_ID      | sLogP | ApolarDesolvation | PolarDesolvation | H Donors | H Acceptors | Charge | MolecularWeight | RotatableBonds | SMILES                                                                                          |
|--------------|-------|-------------------|------------------|----------|-------------|--------|-----------------|----------------|-------------------------------------------------------------------------------------------------|
| ZINC00629925 | 5.07  | 0.1               | -21.84           | 1        | 5           | 0      | 430.529         | 7              | COC1ccc(cc1OC)CC(=O)Nc2cccc(c2)c3csc(n3)c4cccc4                                                 |
| ZINC08439647 | 4.59  | 12.44             | -23.42           | 1        | 6           | 0      | 426.501         | 5              | c1ccc(cc1)c2cccc(c2)S(=O)(=O)Nc3cccc(c3)c4cn5ccccc5n4                                           |
| ZINC08439647 | 4.59  | 12.57             | -67.66           | 0        | 6           | -1     | 425.493         | 5              | c1ccc(cc1)c2cccc(c2)S(=O)(=O)Nc3cccc(c3)c4cn5ccccc5n4                                           |
| ZINC08439644 | 5.08  | 0.38              | -42.68           | 3        | 8           | 1      | 537.64          | 6              | Cc1ccc(cc1)NC(=O)CN2c3cccc3[C@@]4(C2=O)[C@H]5[C@@H]([C@@H]([NH2+][4])CC(C)C)C(=O)N(C5=O)c6cccc6 |
| ZINC08439644 | 5.08  | 0.59              | -50.33           | 3        | 8           | 1      | 537.64          | 6              | Cc1ccc(cc1)NC(=O)CN2c3cccc3[C@@]4(C2=O)[C@H]5[C@@H]([C@@H]([NH2+][4])CC(C)C)C(=O)N(C5=O)c6cccc6 |
| ZINC00629528 | 5.3   | 0.27              | -19.82           | 1        | 4           | 0      | 453.283         | 3              | Cc1ccc(cc1)NC(=O)CN2c3cccc3[C@@]4(C2=O)[C@H]5[C@@H]([C@@H]([NH2+][4])CC(C)C)C(=O)N(C5=O)c6cccc6 |
| ZINC00629528 | 5.3   | 0.5               | -28.5            | 2        | 4           | 1      | 454.291         | 3              | Cc1ccc(cc1)NC(=O)CN2c3cccc3[C@@]4(C2=O)[C@H]5[C@@H]([C@@H]([NH2+][4])CC(C)C)C(=O)N(C5=O)c6cccc6 |
| ZINC08439640 | 6.54  | -2.5              | -11.77           | 0        | 4           | 0      | 467.656         | 7              | CC(C)[C]c1ccc(cc1)S(=O)(=O)N2CCSC[C@@H]2c3cccc(c3)OC4CCCC4                                      |
| ZINC02170859 | 7.7   | 2.27              | -16.98           | 0        | 4           | 0      | 448.632         | 7              | CCc1c(nc(s1)N(c2cccc2OCC)C(=O)C3CCCC3)c4cccc(cc4)C                                              |
| ZINC08439639 | 6.54  | -2.13             | -12.09           | 0        | 4           | 0      | 467.656         | 7              | CC(C)[C]c1ccc(cc1)S(=O)(=O)N2CCSC[C@@H]2c3cccc(c3)OC4CCCC4                                      |
| ZINC08439637 | 4.14  | -0.05             | -44.24           | 2        | 6           | 1      | 481.37          | 4              | CC(C)[C]c1ccc(cc1)S(=O)(=O)N2CCSC[C@@H]2c3cccc(c3)OC4CCCC4                                      |
| ZINC08439636 | 7.8   | 3.84              | -23.31           | 1        | 5           | 0      | 483.656         | 9              | CC(C)[C]c1ccc(cc1)S(=O)(=O)N2CCSC[C@@H]2c3cccc(c3)OC4CCCC4                                      |
| ZINC08439636 | 7.8   | 4.07              | -31.05           | 2        | 5           | 1      | 484.664         | 9              | CC(C)[C]c1ccc(cc1)S(=O)(=O)N2CCSC[C@@H]2c3cccc(c3)OC4CCCC4                                      |
| ZINC08439635 | 1.08  | -1.89             | -12.6            | 2        | 11          | 0      | 402.411         | 7              | Cn1c2c(c(=O)n(c1=O)C)n(c(n2)NN=Cc3ccc(cc3OC)C)CCO                                               |
| ZINC08439635 | 1.08  | -1.63             | -34.17           | 3        | 11          | 1      | 403.419         | 7              | Cn1c2c(c(=O)n(c1=O)C)n(c(n2)NN=Cc3ccc(cc3OC)C)CCO                                               |
| ZINC08439634 | 4.14  | -0.11             | -43.3            | 2        | 6           | 1      | 481.37          | 4              | CC(C)[C]c1ccc(cc1)S(=O)(=O)N2CCSC[C@@H]2c3cccc(c3)OC4CCCC4                                      |
| ZINC08439633 | 7.08  | 2.59              | -16.97           | 1        | 4           | 0      | 464.675         | 9              | CC(C)[C]c1ccc(cc1)S(=O)(=O)N2CCSC[C@@H]2c3cccc(c3)OC4CCCC4                                      |
| ZINC08439631 | 8.61  | -4.01             | -21.99           | 0        | 7           | 0      | 641.774         | 8              | c1ccc(cc1)c2cccc(c2)S(=O)(=O)N(c3c(nc4n3cccc4)c5cccc5)S(=O)(=O)c6cccc(cc6)7c8cccc7              |
| ZINC08439631 | 8.61  | -3.83             | -41.55           | 1        | 7           | 1      | 642.782         | 8              | c1ccc(cc1)c2cccc(c2)S(=O)(=O)N(c3c(nc4n3cccc4)c5cccc5)S(=O)(=O)c6cccc(cc6)7c8cccc7              |
| ZINC08439630 | 4.1   | 1.54              | -11.04           | 0        | 7           | 0      | 457.567         | 10             | CCCCCOC(=O)C1[C@@H](C2=C(C)C(C)C)OCC(=O)N2C2CCCC2)C1C)C3CCCC3)C)C)C                             |
| ZINC08439630 | 4.1   | 1.05              | -12.42           | 0        | 7           | 0      | 457.567         | 10             | CCCCCOC(=O)C1[C@@H](C2=C(C)C(C)C)OCC(=O)N2C2CCCC2)C1C)C3CCCC3)C)C)C                             |
| ZINC08439630 | 4.29  | 0.46              | -11.28           | 0        | 7           | 0      | 457.567         | 10             | CCCCCOC(=O)C1[C@@H](C2=C(C)C(C)C)OCC(=O)N2C2CCCC2)C1C)C3CCCC3)C)C)C                             |
| ZINC01019636 | 6.85  | -4.13             | -22.37           | 0        | 7           | 0      | 545.686         | 8              | CCc1ccc(cc1)S(=O)(=O)N(c2c(nc3n2cccc3)c4cccc4)S(=O)(=O)c5cccc(cc5)CC                            |
| ZINC01019636 | 6.85  | -3.95             | -39.37           | 1        | 7           | 1      | 546.694         | 8              | CCc1ccc(cc1)S(=O)(=O)N(c2c(nc3n2cccc3)c4cccc4)S(=O)(=O)c5cccc(cc5)CC                            |
| ZINC08439628 | 6.63  | -6.67             | -16.29           | 0        | 7           | 0      | 647.37          | 6              | c1ccc(cc1)c2c(n3cccc3n2)N(S(=O)(=O)c4ccc(cc4)Br)S(=O)(=O)c5cccc(cc5)Br                          |
| ZINC08439628 | 6.63  | -6.49             | -37.98           | 1        | 7           | 1      | 648.378         | 6              | c1ccc(cc1)c2c(n3cccc3n2)N(S(=O)(=O)c4ccc(cc4)Br)S(=O)(=O)c5cccc(cc5)Br                          |
| ZINC02170853 | 7.07  | 2.54              | -12.53           | 0        | 6           | 0      | 526.706         | 7              | Cc1ccc(cc1)OCc2nnc(n2c3cccc3)SCC(=O)N4c5c(c6c4CCCC6)CCCC5                                       |
| ZINC08439627 | 4.1   | 1.57              | -11.83           | 0        | 7           | 0      | 457.567         | 10             | CCCCCOC(=O)C1[C@@H](C2=C(C)C(C)C)OCC(=O)N2C2CCCC2)C1C)C3CCCC3)C)C)C                             |
| ZINC08439627 | 4.1   | 1.02              | -13.07           | 0        | 7           | 0      | 457.567         | 10             | CCCCCOC(=O)C1[C@@H](C2=C(C)C(C)C)OCC(=O)N2C2CCCC2)C1C)C3CCCC3)C)C)C                             |
| ZINC08439627 | 4.29  | 0.4               | -11.78           | 0        | 7           | 0      | 457.567         | 10             | CCCCCOC(=O)C1[C@@H](C2=C(C)C(C)C)OCC(=O)N2C2CCCC2)C1C)C3CCCC3)C)C)C                             |
| ZINC00629392 | 4.66  | -0.65             | -13.92           | 1        | 4           | 0      | 445.285         | 3              | c1ccc(cc1)C(=O)Nc2ccc(cc2)c3cn4cccc4n3                                                          |
| ZINC00629389 | 4.68  | 10.99             | -14.58           | 1        | 4           | 0      | 445.285         | 3              | c1ccc(cc1)C(=O)Nc2ccc(cc2)c3cn4cccc4n3                                                          |
| ZINC00643406 | 5.21  | 0.5               | -13.23           | 1        | 6           | 0      | 458.587         | 9              | C[C@@H](c1cccc1)NC(=O)CSc2nnc(n2c3cccc3)c4ccc(cc4)OC                                            |
| ZINC08439626 | 4.95  | -3.5              | -16.99           | 1        | 6           | 0      | 427.551         | 8              | CCCCOC(=O)C1[C@@H](C2=C(C)C(C)C)OCC(=O)N2C2CCCC2)C1C)C3CCCC3)C)C)C                              |
| ZINC00643405 | 5.21  | 13.38             | -13.26           | 1        | 6           | 0      | 458.587         | 9              | C[C@@H](c1cccc1)NC(=O)CSc2nnc(n2c3cccc3)c4ccc(cc4)OC                                            |
| ZINC08439625 | 3.14  | -0.62             | -11.09           | 0        | 7           | 0      | 480.355         | 8              | CC1=NC2=C([C@@H](C1C)C(=O)O)C(C)C)C3CCCC3)C)C)C                                                 |
| ZINC08439625 | 3.32  | -0.5              | -11.88           | 0        | 7           | 0      | 480.355         | 8              | CCCCOC(=O)C1[C@@H](C2=C(C)C(C)C)OCC(=O)N2C2CCCC2)C1C)C3CCCC3)C)C)C                              |
| ZINC08439625 | 3.32  | 0.76              | -12.88           | 0        | 7           | 0      | 480.355         | 8              | CCCCOC(=O)C1[C@@H](C2=C(C)C(C)C)OCC(=O)N2C2CCCC2)C1C)C3CCCC3)C)C)C                              |
| ZINC08439625 | 3.14  | -0.62             | -14.69           | 0        | 7           | 0      | 480.355         | 8              | CC1=C([C@@H]([C@@H]2C[C@@H](C2)C)C)C3CCCC3)C)C)C                                                |
| ZINC02170850 | 7.71  | 2.73              | -10.77           | 0        | 3           | 0      | 440.612         | 7              | CCOC1c(nc(s1)N(c2ccc(c2)C)C)C(=O)C3CCCC3)c4cccc4                                                |
| ZINC02170847 | 5.67  | 1.4               | -9.7             | 0        | 7           | 0      | 504.033         | 8              | CCOC(=O)C1=C(N([C@@]2(S1)N(N=C)S2)C(=O)O)C3CCCC3)C)C4CCCC4)C                                    |
| ZINC08439624 | 5.25  | -2.92             | -17.83           | 1        | 5           | 0      | 431.542         | 5              | c1ccc(cc1)c2ccc(cc2)S(=O)(=O)Nc3cccc(c3)c4cn5ccccc5n4                                           |
| ZINC02170845 | 5.67  | 1.12              | -8.91            | 0        | 7           | 0      | 504.033         | 8              | CCOC(=O)C1=C(N([C@@]2(S1)N(N=C)S2)C(=O)O)C3CCCC3)C)C4CCCC4)C                                    |
| ZINC02170839 | 7.15  | 15.98             | -12.76           | 1        | 5           | 0      | 510.585         | 8              | CC(C)[C]c1ccc(cc1)c2nnc(n2c3cccc3)SCC(=O)Nc4cccc(cc4)F)F)F                                      |
| ZINC08439623 | 3.14  | -0.59             | -11.05           | 0        | 7           | 0      | 480.355         | 8              | CC1=NC2=C([C@@H](C1C)C(=O)O)C(C)C)C3CCCC3)C)C)C                                                 |
| ZINC08439623 | 3.32  | -0.54             | -12.09           | 0        | 7           | 0      | 480.355         | 8              | CCCCOC(=O)C1[C@@H](C2=C(C)C(C)C)OCC(=O)N2C2CCCC2)C1C)C3CCCC3)C)C)C                              |
| ZINC08439623 | 3.32  | 0.78              | -12.66           | 0        | 7           | 0      | 480.355         | 8              | CCCCOC(=O)C1[C@@H](C2=C(C)C(C)C)OCC(=O)N2C2CCCC2)C1C)C3CCCC3)C)C)C                              |
| ZINC08439623 | 3.14  | -0.66             | -15.39           | 0        | 7           | 0      | 480.355         | 8              | CC1=C([C@@H]([C@@H]2C[C@@H](C2)C)C)C3CCCC3)C)C)C                                                |
| ZINC00643400 | 5.46  | 11.79             | -11.28           | 1        | 5           | 0      | 367.445         | 7              | COC(=O)c1ccc(cc1)NC(=O)COC2ccc(c2)C3CC3                                                         |
| ZINC00643398 | 6.16  | 2.21              | -10.35           | 0        | 5           | 0      | 430.957         | 7              | CCCC(=O)N(c1ccc(cc1OC)C)c2nc(c(s2)C)c3ccc(cc3)C1                                                |
| ZINC08439620 | 4.91  | 0.51              | -8.2             | 0        | 5           | 0      | 431.96          | 8              | CCCCCOC(=O)C1[C@@H](C2=C(C)C(C)C)OCC(=O)N2C2CCCC2)C1C)C3CCCC3)C)C)C                             |
| ZINC08439620 | 4.91  | 0.43              | -11.6            | 0        | 5           | 0      | 431.96          | 8              | CCCCCOC(=O)C1[C@@H](C2=C(C)C(C)C)OCC(=O)N2C2CCCC2)C1C)C3CCCC3)C)C)C                             |
| ZINC08439620 | 5.1   | -0.67             | -9.23            | 0        | 5           | 0      | 431.96          | 8              | CCCCCOC(=O)C1[C@@H](C2=C(C)C(C)C)OCC(=O)N2C2CCCC2)C1C)C3CCCC3)C)C)C                             |
| ZINC02170835 | 8.6   | 1.87              | -9.55            | 0        | 4           | 0      | 525.501         | 9              | CCc1c(nc(s1)N(c2ccc(cc2)C)C)C(=O)C3CCCC3)c4ccc(cc4)OC                                           |
| ZINC08439619 | 8.2   | 4.08              | -23.25           | 1        | 5           | 0      | 497.683         | 9              | CC(C)[C]c1ccc(cc1)S(=O)(=O)N2CCSC[C@@H]2c3cccc(c3)OC4CCCC4                                      |
| ZINC08439619 | 8.2   | 4.35              | -30.17           | 2        | 5           | 1      | 498.691         | 9              | CC(C)[C]c1ccc(cc1)S(=O)(=O)N2CCSC[C@@H]2c3cccc(c3)OC4CCCC4                                      |
| ZINC05918543 | 7.78  | 18.11             | -17.65           | 1        | 5           | 0      | 497.683         | 9              | CC(C)[C]c1ccc(cc1)S(=O)(=O)N2CCSC[C@@H]2c3cccc(c3)OC4CCCC4                                      |
| ZINC05918543 | 7.78  | 18.56             | -31.83           | 2        | 5           | 1      | 498.691         | 9              | CC(C)[C]c1ccc(cc1)S(=O)(=O)N2CCSC[C@@H]2c3cccc(c3)OC4CCCC4                                      |
| ZINC02170831 | 8.12  | 2.36              | -10.24           | 0        | 3           | 0      | 481.448         | 6              | CCc1c(nc(s1)N(c2ccc(cc2)C)C)C(=O)C3CCCC3)c4ccc(cc4)C                                            |
| ZINC00629164 | 3.62  | -0.63             | -14.14           | 4        | 4           | 0      | 428.105         | 3              | C1c(c(s1)C)N(Cn2cnc3c(c2=O)cc(c3)Br)Br                                                          |
| ZINC08439618 | 4.91  | 0.72              | -9.35            | 0        | 5           | 0      | 431.96          | 8              | CCCCCOC(=O)C1[C@@H](C2=C(C)C(C)C)OCC(=O)N2C2CCCC2)C1C)C3CCCC3)C)C)C                             |

Supplementary Table S2:

Detailed table of XP Docking using Schrodinger's Glide module

| ZINC_ID      | xtLogP | ApolarDesolvation | PolarDesolvation | H Donors | H Acceptors | Charge | MolecularWeight | RotatableBonds | SMILES                                                                                         |
|--------------|--------|-------------------|------------------|----------|-------------|--------|-----------------|----------------|------------------------------------------------------------------------------------------------|
| ZINC08439618 | 4.91   | 0.79              | -12.2            | 0        | 5           | 0      | 431.96          | 8              | CCCCCOC(=O)C1=C(N=C2CC(C(=O)C2)C@H)1c3cccc3C1)C)C                                              |
| ZINC08439618 | 5.1    | -0.08             | -10.77           | 0        | 5           | 0      | 431.96          | 8              | CCCCCOC(=O)C1C@H(C2C=NC1=C)CC(C2=O)(C)C)c3cccc3C1                                              |
| ZINC02170829 | 6.71   | 1.95              | -14.57           | 1        | 6           | 0      | 486.641         | 9              | CCOC1ccc(cc1)NC(=O)CSc2nnc(n2c3cccc3)c4ccc(cc4)C)C)C                                           |
| ZINC00624874 | 2.62   | 0.69              | -17.59           | 1        | 6           | 0      | 430.205         | 3              | c1ccc(c(c1)C#N)NC(=O)Cn2cnc3ccc(cc3c2=O)I                                                      |
| ZINC08439617 | 4.91   | -0.65             | -8.93            | 0        | 7           | 0      | 520.42          | 8              | CCCCCOC(=O)C1C@H(C2=C(C)C(C2=O)(C)C)N=C1C)c3cc4c(cc3Br)OC04                                    |
| ZINC08439617 | 4.91   | -0.66             | -12.11           | 0        | 7           | 0      | 520.42          | 8              | CCCCCOC(=O)C1=C(N=C2CC(C(=O)C2)C@H)1c3cc4c(cc3Br)OC04)(C)C                                     |
| ZINC08439617 | 5.09   | -1.59             | -10.01           | 0        | 7           | 0      | 520.42          | 8              | CCCCCOC(=O)C1C@H(C2C=NC1=C)CC(C2=O)(C)C)c3cc4c(cc3Br)OC04                                      |
| ZINC02170827 | 7.79   | 2.36              | -13.73           | 0        | 3           | 0      | 434.992         | 6              | CCCCC(=O)N(c1cccc2c1cccc2)c3nc(c(s3)C)c4ccc(cc4)Cl                                             |
| ZINC00643395 | 5.84   | 0.02              | -18.04           | 1        | 6           | 0      | 494.016         | 5              | Cc1c(c2ccc(ccc2n1C(=O)c3ccc(cc3)Cl)OC)C(=O)Nc4nc5c(s4)CCCC5                                    |
| ZINC08439616 | 4.75   | -0.63             | -9.28            | 0        | 6           | 0      | 450.329         | 7              | CC1=NC(=C)C(C@H)C1C(=O)OC)c2ccc(c2)Br)C(=O)OC)C@H)3CCC03)C                                     |
| ZINC08439616 | 4.93   | -0.63             | -7.58            | 0        | 6           | 0      | 450.329         | 7              | CC1=NC(=C)C(C@H)C1C(=O)OC)C@H)2CCC02)c3ccc(c3)Br)C(=O)OC                                       |
| ZINC08439616 | 4.93   | 0.72              | -12.33           | 0        | 6           | 0      | 450.329         | 7              | CC1=NC(=C)C(C@H)C1C(=O)OC)C@H)2CCC02)c3ccc(c3)Br)C(=O)OC                                       |
| ZINC08439616 | 4.75   | -0.72             | -8.32            | 0        | 6           | 0      | 450.329         | 7              | CC1=NC(=C)C(C@H)C1C(=O)OC)C@H)2CCC02)c3ccc(c3)Br)C(=O)OC)C                                     |
| ZINC08439615 | 4.91   | -0.65             | -9.4             | 0        | 7           | 0      | 520.42          | 8              | CCCCCOC(=O)C1C@H(C2=C(C)C(C2=O)(C)C)N=C1C)c3cc4c(cc3Br)OC04                                    |
| ZINC08439615 | 4.91   | -1.02             | -12.24           | 0        | 7           | 0      | 520.42          | 8              | CCCCCOC(=O)C1=C(N=C2CC(C(=O)C2)C@H)1c3cc4c(cc3Br)OC04)(C)C)C                                   |
| ZINC08439615 | 5.09   | -2.08             | -9.83            | 0        | 7           | 0      | 520.42          | 8              | CCCCCOC(=O)C1C@H(C2C=NC1=C)CC(C2=O)(C)C)c3cc4c(cc3Br)OC04                                      |
| ZINC08439614 | 4.75   | -0.57             | -9.83            | 0        | 6           | 0      | 450.329         | 7              | CC1=NC(=C)C(C@H)C1C(=O)OC)c2ccc(c2)Br)C(=O)OC)C@H)3CCC03)C                                     |
| ZINC08439614 | 4.93   | -0.49             | -9.82            | 0        | 6           | 0      | 450.329         | 7              | CC1=NC(=C)C(C@H)C1C(=O)OC)C@H)2CCC02)c3ccc(c3)Br)C(=O)OC                                       |
| ZINC08439614 | 4.93   | 0.94              | -15.72           | 0        | 6           | 0      | 450.329         | 7              | CC1=NC(=C)C(C@H)C1C(=O)OC)C@H)2CCC02)c3ccc(c3)Br)C(=O)OC                                       |
| ZINC08439614 | 4.75   | -0.61             | -9.59            | 0        | 6           | 0      | 450.329         | 7              | CC1=NC(=C)C(C@H)C1C(=O)OC)C@H)2CCC02)c3ccc(c3)Br)C(=O)OC)C                                     |
| ZINC02170825 | 7.06   | 2.36              | -14.41           | 0        | 4           | 0      | 438.568         | 6              | CcC1c(nc(s1)N(c2ccc(c2)F)C)C)C3CCCC3)c4ccc(cc4)OC                                              |
| ZINC08439613 | 4.75   | -0.68             | -9.36            | 0        | 6           | 0      | 450.329         | 7              | CC1=NC(=C)C(C@H)C1C(=O)OC)c2ccc(c2)Br)C(=O)OC)C@H)3CCC03)C                                     |
| ZINC08439613 | 4.93   | -0.58             | -7.83            | 0        | 6           | 0      | 450.329         | 7              | CC1=NC(=C)C(C@H)C1C(=O)OC)C@H)2CCC02)c3ccc(c3)Br)C(=O)OC                                       |
| ZINC08439613 | 4.93   | 0.76              | -10.91           | 0        | 6           | 0      | 450.329         | 7              | CC1=NC(=C)C(C@H)C1C(=O)OC)C@H)2CCC02)c3ccc(c3)Br)C(=O)OC                                       |
| ZINC08439613 | 4.75   | -0.62             | -8.09            | 0        | 6           | 0      | 450.329         | 7              | CC1=NC(=C)C(C@H)C1C(=O)OC)C@H)2CCC02)c3ccc(c3)Br)C(=O)OC)C                                     |
| ZINC02170823 | 6.1    | 0.97              | -13.6            | 0        | 4           | 0      | 445.382         | 6              | CCC(=O)N(c1cccc(c1)Br)c2nc(c(s2)C)c3ccc(cc3)OCC                                                |
| ZINC08439612 | 5.23   | 0.1               | -13.75           | 0        | 6           | 0      | 475.585         | 11             | CCCCCOC(=O)C1C@H(C2=C(C)C(C2=O)N=C1C)c3cccc3OC4cccc4                                           |
| ZINC08439612 | 5.23   | -0.02             | -17.16           | 0        | 6           | 0      | 475.585         | 11             | CCCCCOC(=O)C1=C(N=C2CC(C(=O)C2)C@H)1c3cccc3OC4cccc4)C                                          |
| ZINC08439612 | 5.42   | -1.05             | -14.66           | 0        | 6           | 0      | 475.585         | 11             | CCCCCOC(=O)C1C@H(C2C=NC1=C)CC(C2=O)c3cccc3OC4cccc4                                             |
| ZINC08439611 | 4.75   | -0.69             | -7.03            | 0        | 6           | 0      | 450.329         | 7              | CC1=NC(=C)C(C@H)C1C(=O)OC)c2ccc(c2)Br)C(=O)OC)C@H)3CCC03)C                                     |
| ZINC08439611 | 4.93   | -0.69             | -6.7             | 0        | 6           | 0      | 450.329         | 7              | CC1=NC(=C)C(C@H)C1C(=O)OC)C@H)2CCC02)c3ccc(c3)Br)C(=O)OC                                       |
| ZINC08439611 | 4.93   | 0.81              | -13.48           | 0        | 6           | 0      | 450.329         | 7              | CC1=NC(=C)C(C@H)C1C(=O)OC)C@H)2CCC02)c3ccc(c3)Br)C(=O)OC                                       |
| ZINC08439611 | 4.75   | -0.82             | -6.83            | 0        | 6           | 0      | 450.329         | 7              | CC1=NC(=C)C(C@H)C1C(=O)OC)C@H)2CCC02)c3ccc(c3)Br)C(=O)OC)C                                     |
| ZINC02170814 | 5.2    | 0.14              | -14.26           | 1        | 5           | 0      | 471.56          | 5              | c1ccc(cc1)CN2C(=O)c3ccc3N(C)C24c5cccc5N(C4=O)C/C=C/c6cccc6                                     |
| ZINC08439610 | 5.19   | 4.59              | -71.34           | 0        | 6           | 2      | 718.864         | 6              | c1ccc2c(c1)nc3c(n1)nc4c(c3)c5cccc5c4ccc6)CCCC#CC#CC(Cn7)8cccc8)n+ 9e7cc-1c(n9)-c2cccc3c2c1ccc3 |
| ZINC02170819 | 5.2    | 0.15              | -14.58           | 1        | 5           | 0      | 471.56          | 5              | c1ccc(cc1)CN2C(=O)c3ccc3N(C)C24c5cccc5N(C4=O)C/C=C/c6cccc6                                     |
| ZINC08439609 | 5.23   | 0.54              | -15.48           | 0        | 6           | 0      | 475.585         | 11             | CCCCCOC(=O)C1C@H(C2=C(C)C(C2=O)N=C1C)c3cccc3OC4cccc4                                           |
| ZINC08439609 | 5.23   | 0.4               | -18.63           | 0        | 6           | 0      | 475.585         | 11             | CCCCCOC(=O)C1=C(N=C2CC(C(=O)C2)C@H)1c3cccc3OC4cccc4)C                                          |
| ZINC08439609 | 5.42   | -0.58             | -15.38           | 0        | 6           | 0      | 475.585         | 11             | CCCCCOC(=O)C1C@H(C2C=NC1=C)CC(C2=O)c3cccc3OC4cccc4                                             |
| ZINC08439608 | 2.48   | 6.26              | -67.1            | 0        | 6           | 2      | 582.796         | 10             | CCc1cc2n(c3ccc(c3)n+ 2me1CC)CCC#CC#CC(Cn4)5cccc5)n+ 6e4ccf(cn6)CC                              |
| ZINC02170809 | 6.11   | 1.78              | -13.71           | 0        | 4           | 0      | 470.638         | 6              | CCc1c(nc(s1)N(c2ccc3ccc(c3)C2)C)C4(C)CC4)c5ccc(cc5)OC                                          |
| ZINC02170805 | 6.7    | -0.25             | -14.67           | 1        | 5           | 0      | 514.412         | 3              | Cc1cccc(c1)N2C(=O)c3ccc3N(C)C24c5cccc5N(C4=O)C6cc(ccc6)Cl                                      |
| ZINC08439607 | 6.04   | 0.47              | -8.72            | 0        | 5           | 0      | 466.405         | 8              | CCCCCOC(=O)C1C@H(C2=C(C)C(C2=O)(C)C)N=C1C)c3ccc(c(c3)Cl)Cl                                     |
| ZINC08439607 | 6.04   | 0.47              | -11.02           | 0        | 5           | 0      | 466.405         | 8              | CCCCCOC(=O)C1=C(N=C2CC(C(=O)C2)C@H)1c3ccc(c(c3)Cl)C)C)C                                        |
| ZINC08439607 | 6.22   | -0.53             | -9.35            | 0        | 5           | 0      | 466.405         | 8              | CCCCCOC(=O)C1C@H(C2C=NC1=C)CC(C2=O)(C)C)c3ccc(c(c3)Cl)Cl                                       |
| ZINC08439606 | 9.17   | 3.95              | -15              | 0        | 6           | 0      | 663.612         | 8              | c1ccc(cc1)C(c2ccc(c2)(c3ccc(c3)n4nc(m4)c5cccc5c6ccc(cc6)Cn7)8cccc7cc(c(c8)Cl)Cl                |
| ZINC02170807 | 6.7    | -0.29             | -15.01           | 1        | 5           | 0      | 514.412         | 3              | Cc1cccc(c1)N2C(=O)c3ccc3N(C)C24c5cccc5N(C4=O)C6cc(ccc6)Cl                                      |
| ZINC00643391 | 6.55   | 2.78              | -13.43           | 0        | 4           | 0      | 446.547         | 7              | Cc1c(nc(s1)N(c2ccc(cc2)F)C)C)C3CCCC3)c4ccc(cc4)OC                                              |
| ZINC08439605 | 9.89   | 4.19              | -16.04           | 0        | 6           | 0      | 650.83          | 11             | CCCCC1nc2ccc2n1Cc3ccc(cc3)c4cccc4c5nnn(s4)Cl6cccc6)(c7cccc7)c8cccc8                            |
| ZINC08439604 | 6.04   | 0.55              | -7.54            | 0        | 5           | 0      | 466.405         | 8              | CCCCCOC(=O)C1C@H(C2=C(C)C(C2=O)(C)C)N=C1C)c3ccc(c(c3)Cl)Cl                                     |
| ZINC08439604 | 6.04   | 0.62              | -10.39           | 0        | 5           | 0      | 466.405         | 8              | CCCCCOC(=O)C1=C(N=C2CC(C(=O)C2)C@H)1c3ccc(c(c3)Cl)C)C)C                                        |
| ZINC08439604 | 6.22   | -0.24             | -9.1             | 0        | 5           | 0      | 466.405         | 8              | CCCCCOC(=O)C1C@H(C2C=NC1=C)CC(C2=O)(C)C)c3ccc(c(c3)Cl)Cl                                       |
| ZINC02170802 | 8.36   | 1.18              | -8.08            | 0        | 3           | 0      | 525.899         | 7              | CcC1c(nc(s1)N(c2ccc(c2)Br)C)C(=O)CC3CCCC3)c4ccc(cc4)Cl                                         |
| ZINC00629054 | 4.56   | -2.84             | -14.74           | 2        | 5           | 0      | 440.396         | 9              | COc1ccc(cc1)OC2CCC2)C(C)C(=S)N3C(C)C(C)C1Cl                                                    |
| ZINC02170798 | 8.37   | 2.35              | -8.14            | 0        | 3           | 0      | 453.051         | 5              | CcC1c(nc(s1)N(c2ccc(cc2)C)C)C(=O)C3CCCC3)c4ccc(cc4)Cl                                          |
| ZINC00643388 | 4.79   | 14.33             | -18.01           | 1        | 7           | 0      | 487.61          | 8              | C(C@H)C(=O)Nc1nccs1)Sc2nnc(n2c3cccc3)CO4cccc54cccc5                                            |
| ZINC08439603 | 5.57   | -0.01             | -9.36            | 0        | 5           | 0      | 476.411         | 8              | CCCCCOC(=O)C1C@H(C2=C(C)C(C2=O)(C)C)N=C1C)c3ccc(cc3)Br                                         |
| ZINC08439603 | 5.57   | -0.36             | -11.27           | 0        | 5           | 0      | 476.411         | 8              | CCCCCOC(=O)C1=C(N=C2CC(C(=O)C2)C@H)1c3ccc(c(c3)Br)C)C)C                                        |
| ZINC08439603 | 5.75   | -1.24             | -9.85            | 0        | 5           | 0      | 476.411         | 8              | CCCCCOC(=O)C1C@H(C2C=NC1=C)CC(C2=O)(C)C)c3ccc(cc3)Br                                           |
| ZINC08439602 | 3.15   | 16.24             | -37.83           | 0        | 7           | 1      | 428.449         | 4              | c1ccc2c(c1)n+ 3cc(c(cc3s2)c4ccc(c4)N)n+ =[O]O-]c5ccc(c5)N+ [O]O-]                              |
| ZINC02170795 | 8.27   | 1.51              | -9.38            | 0        | 4           | 0      | 535.507         | 9              | CCCCc1(nc(s1)N(c2ccc(cc2)Br)C)C(=O)CC3CCCC3)c4ccc(cc4)OC                                       |

Supplementary Table S2:

Detailed table of XP Docking using Schrodinger's Glide module

| ZINC_ID      | sLogP | ApolarDesolvation | PolarDesolvation | H Donors | H Acceptors | Charge | MolecularWeight | RotatableBonds | SMILES                                                                                     |
|--------------|-------|-------------------|------------------|----------|-------------|--------|-----------------|----------------|--------------------------------------------------------------------------------------------|
| ZINC08439601 | 3.57  | 3.63              | -39.06           | 0        | 7           | 1      | 454.487         | 5              | c1ccc(cc1)c2csc3[n+](c2)cc(c3)c4cccc(c4)[N+](=O)[O-]c5cccc(c5)[N+](=O)[O-]                 |
| ZINC02170789 | 6.57  | 1.59              | -16.52           | 0        | 3           | 0      | 463.4           | 5              | Cc1c(nc(s1)Nc2cccc2Br)C(=O)Cc3cccc3)c4cccc4                                                |
| ZINC08439600 | 1.57  | -2.26             | -12.46           | 3        | 11          | 0      | 427.417         | 7              | CC1=C([C@H](n2cnc(c2N1)C(=O)N)c3cccc3N+)(=O)[O-]C(=O)OC[C@H]4CCCCO4                        |
| ZINC08439600 | 1.57  | -1.95             | -39.09           | 4        | 11          | 1      | 428.425         | 7              | CC1=C([C@H](n2c[nH+](c2N1)C(=O)N)c3cccc3N+)(=O)[O-]C(=O)OC[C@H]4CCCCO4                     |
| ZINC08439599 | 5.57  | 0.03              | -7.78            | 0        | 5           | 0      | 476.411         | 8              | CCOCOCOC(=O)C1[C@H](C2=C(C(C(C2=O)[C]N=C1C)c3ccc(c3)Br                                     |
| ZINC08439599 | 5.57  | 0.11              | -10.63           | 0        | 5           | 0      | 476.411         | 8              | CCOCOCOC(=O)C1=C(N=C2CC(C(C(=O)C2)[C@H]1c3ccc(c3)Br)(C)C                                   |
| ZINC08439599 | 5.75  | -0.81             | -8.61            | 0        | 5           | 0      | 476.411         | 8              | CCOCOCOC(=O)C1[C@H](C2C(=NC1=C)CC(C2=O)[C]C)c3ccc(c3)Br                                    |
| ZINC02170779 | 4.16  | 0.16              | -12.43           | 0        | 6           | 0      | 432.354         | 4              | CC1=C(S[C@@]2(N1C)N(N=C(S2)C(=O)C)c3c(ccc3C)C)C(=O)OC                                      |
| ZINC08439598 | 1.57  | -2.09             | -13.86           | 3        | 11          | 0      | 427.417         | 7              | CC1=C([C@H](n2cnc(c2N1)C(=O)N)c3cccc3N+)(=O)[O-]C(=O)OC[C@H]4CCCCO4                        |
| ZINC08439598 | 1.57  | -1.78             | -41.17           | 4        | 11          | 1      | 428.425         | 7              | CC1=C([C@H](n2c[nH+](c2N1)C(=O)N)c3cccc3N+)(=O)[O-]C(=O)OC[C@H]4CCCCO4                     |
| ZINC02170776 | 4.16  | 0.36              | -12.61           | 0        | 6           | 0      | 432.354         | 4              | CC1=C(S[C@@]2(N1C)N(N=C(S2)C(=O)C)c3c(ccc3C)C)C(=O)OC                                      |
| ZINC08439597 | 1.57  | -2.07             | -13.85           | 3        | 11          | 0      | 427.417         | 7              | CC1=C([C@H](n2cnc(c2N1)C(=O)N)c3cccc3N+)(=O)[O-]C(=O)OC[C@H]4CCCCO4                        |
| ZINC08439596 | 5.01  | 2.23              | -9.46            | 0        | 5           | 0      | 433.495         | 8              | CCOCOCOC(=O)C1[C@H](C2=C(C(C(C2=O)[C]N=C1C)c3ccc(c3)F                                      |
| ZINC08439596 | 5.01  | 2.22              | -11.91           | 0        | 5           | 0      | 433.495         | 8              | CCOCOCOC(=O)C1=C(N=C2CC(C(C(=O)C2)[C@H]1c3ccc(c3)F)(C)C                                    |
| ZINC08439596 | 5.19  | 1.22              | -10.43           | 0        | 5           | 0      | 433.495         | 8              | CCOCOCOC(=O)C1[C@H](C2C(=NC1=C)CC(C2=O)[C]C)c3ccc(c3)F                                     |
| ZINC02170771 | 8.24  | 1.87              | -8.69            | 0        | 4           | 0      | 477.457         | 9              | CCc1c(nc(s1)Nc2ccc(c2)C)C)C(=O)CCc3ccc(c3)OC                                               |
| ZINC08439595 | 1.57  | -2.47             | -12.05           | 3        | 11          | 0      | 427.417         | 7              | CC1=C([C@H](n2cnc(c2N1)C(=O)N)c3cccc3N+)(=O)[O-]C(=O)OC[C@H]4CCCCO4                        |
| ZINC08439595 | 1.57  | -2.16             | -39.57           | 4        | 11          | 1      | 428.425         | 7              | CC1=C([C@H](n2c[nH+](c2N1)C(=O)N)c3cccc3N+)(=O)[O-]C(=O)OC[C@H]4CCCCO4                     |
| ZINC02170769 | 7.1   | 5.1               | -15.55           | 2        | 4           | 0      | 549.298         | 8              | c1ccc(cc1)CC(C(=O)Nc2cc(c2c3C)C)F)F)C(=O)Nc3ccc(c3)C)F)F                                   |
| ZINC02170766 | 8.28  | 14.71             | -11.33           | 1        | 4           | 0      | 469.503         | 7              | COC1cccc1C(=O)Nc2cc(c2c3ccc(c3)C4CCCC4)C)F)F)F                                             |
| ZINC08439594 | 5.01  | 2.3               | -8.35            | 0        | 5           | 0      | 433.495         | 8              | CCOCOCOC(=O)C1[C@H](C2=C(C(C(C2=O)[C]N=C1C)c3ccc(c3)F                                      |
| ZINC08439594 | 5.01  | 2.38              | -11.27           | 0        | 5           | 0      | 433.495         | 8              | CCOCOCOC(=O)C1=C(N=C2CC(C(C(=O)C2)[C@H]1c3ccc(c3)F)(C)C                                    |
| ZINC08439594 | 5.19  | 1.51              | -10.01           | 0        | 5           | 0      | 433.495         | 8              | CCOCOCOC(=O)C1[C@H](C2C(=NC1=C)CC(C2=O)[C]C)c3ccc(c3)F                                     |
| ZINC00717214 | 3.77  | 1.13              | -16.57           | 0        | 7           | 0      | 469.559         | 7              | CC1=NC2=C([C@H](C1C(=O)OC)c3ccc(c3C)OC)OC)C(=O)C[C@H](C2)c4ccc4                            |
| ZINC00717214 | 3.96  | 1.17              | -14.58           | 0        | 7           | 0      | 469.559         | 7              | COc1ccc(c1OC)C([C@H]2C3C(=NC(=O)C2)C(=O)OC)C[C@H](C3=O)c4ccc4                              |
| ZINC00717214 | 3.96  | 2.44              | -19.34           | 0        | 7           | 0      | 469.559         | 7              | COc1ccc(c1OC)C([C@H]2[C@H]3C(=NC(=O)C2)C(=O)OC)C[C@H](C3=O)c4ccc4                          |
| ZINC00717214 | 3.77  | 0.89              | -15.75           | 0        | 7           | 0      | 469.559         | 7              | CC1=C([C@H]([C@H]2C(=N1)C[C@H](C2=O)c3ccc3)c4ccc(c4OC)OC)C(=O)OC                           |
| ZINC00717215 | 3.77  | 1.76              | -11.42           | 0        | 7           | 0      | 469.559         | 7              | CC1=NC2=C([C@H](C1C(=O)OC)c3ccc(c3C)OC)OC)C(=O)C[C@H](C2)c4ccc4                            |
| ZINC00717215 | 3.96  | 1.81              | -11.62           | 0        | 7           | 0      | 469.559         | 7              | COc1ccc(c1OC)C([C@H]2C3C(=NC(=O)C2)C(=O)OC)C[C@H](C3=O)c4ccc4                              |
| ZINC00717215 | 3.96  | 2.89              | -14.76           | 0        | 7           | 0      | 469.559         | 7              | COc1ccc(c1OC)C([C@H]2[C@H]3C(=NC(=O)C2)C(=O)OC)C[C@H](C3=O)c4ccc4                          |
| ZINC00717215 | 3.77  | 1.67              | -13.04           | 0        | 7           | 0      | 469.559         | 7              | CC1=C([C@H]([C@H]2C(=N1)C[C@H](C2=O)c3ccc3)c4ccc(c4OC)OC)C(=O)OC                           |
| ZINC00717216 | 3.77  | 1.12              | -16.32           | 0        | 7           | 0      | 469.559         | 7              | CC1=NC2=C([C@H](C1C(=O)OC)c3ccc(c3C)OC)OC)C(=O)C[C@H](C2)c4ccc4                            |
| ZINC00717216 | 3.96  | 1.24              | -14.45           | 0        | 7           | 0      | 469.559         | 7              | COc1ccc(c1OC)C([C@H]2C3C(=NC(=O)C2)C(=O)OC)C[C@H](C3=O)c4ccc4                              |
| ZINC00717216 | 3.96  | 2.41              | -19.98           | 0        | 7           | 0      | 469.559         | 7              | COc1ccc(c1OC)C([C@H]2[C@H]3C(=NC(=O)C2)C(=O)OC)C[C@H](C3=O)c4ccc4                          |
| ZINC00717216 | 3.77  | 0.97              | -15.41           | 0        | 7           | 0      | 469.559         | 7              | CC1=C([C@H]([C@H]2C(=N1)C[C@H](C2=O)c3ccc3)c4ccc(c4OC)OC)C(=O)OC                           |
| ZINC08439593 | 4.1   | 1.76              | -41.38           | 2        | 6           | 1      | 430.528         | 5              | CC(C)C[C@H]1[C@H]2[C@H](C(=O)N(C2=O)c3ccc3)[C@@]4([NH2+][1]c5cccc5N(C4=O)CC=C              |
| ZINC00717217 | 3.77  | 1.26              | -10.07           | 0        | 7           | 0      | 469.559         | 7              | CC1=NC2=C([C@H](C1C(=O)OC)c3ccc(c3C)OC)OC)C(=O)C[C@H](C2)c4ccc4                            |
| ZINC00717217 | 3.96  | 1.33              | -11.12           | 0        | 7           | 0      | 469.559         | 7              | COc1ccc(c1OC)C([C@H]2C3C(=NC(=O)C2)C(=O)OC)C[C@H](C3=O)c4ccc4                              |
| ZINC00717217 | 3.96  | 2.76              | -16.48           | 0        | 7           | 0      | 469.559         | 7              | COc1ccc(c1OC)C([C@H]2[C@H]3C(=NC(=O)C2)C(=O)OC)C[C@H](C3=O)c4ccc4                          |
| ZINC00717217 | 3.77  | 1.22              | -13.46           | 0        | 7           | 0      | 469.559         | 7              | CC1=C([C@H]([C@H]2C(=N1)C[C@H](C2=O)c3ccc3)c4ccc(c4OC)OC)C(=O)OC                           |
| ZINC08439592 | 2.52  | -1.98             | -73.38           | 4        | 8           | 2      | 718.946         | 13             | Cc1cc2(c(c1C)N)h3c2[n+](c43cccc4)CC(=O)NCCCCCNC(=O)C[n+](c5ccc67cc(c(c67)h)cc68c5cccc8)C)C |
| ZINC08439591 | 4.1   | 1.54              | -44.85           | 2        | 6           | 1      | 430.528         | 5              | CC(C)C[C@H]1[C@H]2[C@H](C(=O)N(C2=O)c3ccc3)[C@@]4([NH2+][1]c5cccc5N(C4=O)CC=C              |
| ZINC08439590 | 4.34  | 2.23              | -7.87            | 0        | 6           | 0      | 439.43          | 8              | CC1=NC(=C)C([C@H](C1C(=O)OC)c2ccc2C(F)F)F)C(=O)OC[C@H]3CCCCO3)C                            |
| ZINC08439590 | 4.52  | 2.16              | -7.41            | 0        | 6           | 0      | 439.43          | 8              | CC1=NC(=C)C([C@H](C1C(=O)OC)C@H)2CCCCO2)c3ccc3C(F)F)F)C(=O)OC                              |
| ZINC08439590 | 4.52  | 3.69              | -15.55           | 0        | 6           | 0      | 439.43          | 8              | CC1=NC(=C)C([C@H](C1C(=O)OC)C@H)2CCCCO2)c3ccc3C(F)F)F)C(=O)OC                              |
| ZINC08439590 | 4.34  | 2.21              | -7.94            | 0        | 6           | 0      | 439.43          | 8              | CC1=NC(=C)C([C@H](C1C(=O)OC)C@H)2CCCCO2)c3ccc3C(F)F)F)C(=O)OC                              |
| ZINC08439588 | 4.89  | -0.77             | -8.32            | 0        | 5           | 0      | 448.357         | 8              | CCOCOCOC(=O)C1[C@H](C2=C(C(C(C2=O)N=C1C)c3ccc(c3)Br                                        |
| ZINC08439588 | 4.89  | -0.95             | -12.08           | 0        | 5           | 0      | 448.357         | 8              | CCOCOCOC(=O)C1=C(N=C2CC(C(C(=O)C2)[C@H]1c3ccc(c3)Br                                        |
| ZINC08439588 | 5.07  | -1.87             | -9.72            | 0        | 5           | 0      | 448.357         | 8              | CCOCOCOC(=O)C1[C@H](C2C(=NC1=C)CC(C2=O)[C]C)c3ccc(c3)Br                                    |
| ZINC08439587 | 4.34  | 2.27              | -14.97           | 0        | 6           | 0      | 439.43          | 8              | CC1=NC(=C)C([C@H](C1C(=O)OC)c2ccc2C(F)F)F)C(=O)OC[C@H]3CCCCO3)C                            |
| ZINC08439587 | 4.52  | 2.33              | -12.29           | 0        | 6           | 0      | 439.43          | 8              | CC1=NC(=C)C([C@H](C1C(=O)OC)C@H)2CCCCO2)c3ccc3C(F)F)F)C(=O)OC                              |
| ZINC08439587 | 4.52  | 3.57              | -15.7            | 0        | 6           | 0      | 439.43          | 8              | CC1=NC(=C)C([C@H]([C@H]1C(=O)OC)C@H)2CCCCO2)c3ccc3C(F)F)F)C(=O)OC                          |
| ZINC08439587 | 4.34  | 2.07              | -12.36           | 0        | 6           | 0      | 439.43          | 8              | CC1=NC(=C)C([C@H]([C@H]1C(=O)OC)C@H)2CCCCO2)c3ccc3C(F)F)F)C(=O)OC                          |
| ZINC08439585 | 4.34  | 1.92              | -7.59            | 0        | 6           | 0      | 439.43          | 8              | CC1=NC(=C)C([C@H](C1C(=O)OC)c2ccc2C(F)F)F)C(=O)OC[C@H]3CCCCO3)C                            |
| ZINC08439585 | 4.52  | 2.02              | -7.34            | 0        | 6           | 0      | 439.43          | 8              | CC1=NC(=C)C([C@H](C1C(=O)OC)C@H)2CCCCO2)c3ccc3C(F)F)F)C(=O)OC                              |
| ZINC08439585 | 4.52  | 3.38              | -15.51           | 0        | 6           | 0      | 439.43          | 8              | CC1=NC(=C)C([C@H]([C@H]1C(=O)OC)C@H)2CCCCO2)c3ccc3C(F)F)F)C(=O)OC                          |
| ZINC08439585 | 4.34  | 1.91              | -7.48            | 0        | 6           | 0      | 439.43          | 8              | CC1=NC(=C)C([C@H]([C@H]1C(=O)OC)C@H)2CCCCO2)c3ccc3C(F)F)F)C(=O)OC                          |
| ZINC02170763 | 7.62  | 1.59              | -11.15           | 0        | 3           | 0      | 491.454         | 6              | CCc1c(nc(s1)Nc2ccc(c2)Br)C(=O)Cc3cccc3)c4ccc(c4)C                                          |
| ZINC08439584 | 4.34  | 2.1               | -12.56           | 0        | 6           | 0      | 439.43          | 8              | CC1=NC(=C)C([C@H](C1C(=O)OC)c2ccc2C(F)F)F)C(=O)OC[C@H]3CCCCO3)C                            |
| ZINC08439584 | 4.52  | 2.25              | -11.49           | 0        | 6           | 0      | 439.43          | 8              | CC1=NC(=C)C([C@H]([C1C(=O)OC]C@H)2CCCCO2)c3ccc3C(F)F)F)C(=O)OC                             |
| ZINC08439584 | 4.52  | 3.64              | -25.54           | 0        | 6           | 0      | 439.43          | 8              | CC1=NC(=C)C([C@H]([C@H]1C(=O)OC)C@H)2CCCCO2)c3ccc3C(F)F)F)C(=O)OC                          |

**Supplementary Table S2:  
Detailed table of XP Docking using Schrodinger's Glide module**

| ZINC_ID      | sLogP | ApolarDesolvation | PolarDesolvation | H Donors | H Acceptors | Charge | MolecularWeight | RotatableBonds | SMILES                                                                                 |
|--------------|-------|-------------------|------------------|----------|-------------|--------|-----------------|----------------|----------------------------------------------------------------------------------------|
| ZINC08439584 | 4.34  | 2                 | -11.72           | 0        | 6           | 0      | 439.43          | 8              | CC1=NC(=C([C@@H]1C(=O)OC)C@H2CCC02)c3ccc3C(F)(F)F)C(=O)OC                              |
| ZINC08439583 | 4.89  | -0.74             | -9.5             | 0        | 5           | 0      | 448.357         | 8              | CCCCCOC(=O)C1C@H(C2=C(CCCC2=O)N=C1)c3ccc(c3)Br                                         |
| ZINC08439583 | 4.89  | -0.94             | -12.74           | 0        | 5           | 0      | 448.357         | 8              | CCCCCOC(=O)C1=C(CN=C2CCC(=O)C2)C@H1e3ccc(c3)Br                                         |
| ZINC08439583 | 5.07  | -1.85             | -10.54           | 0        | 5           | 0      | 448.357         | 8              | CCCCCOC(=O)C1C@H(C2C=NC1=C(CCCC2=O)c3ccc(c3)Br                                         |
| ZINC02170761 | 7.71  | 0.86              | -13.83           | 0        | 4           | 0      | 499.474         | 6              | Cc1c(nc(s1)N(c2ccc(c2)Br)C(=O)C3CCCC3)c4ccc(cc4)OC                                     |
| ZINC08439582 | 4.53  | 0.39              | -11.25           | 0        | 9           | 0      | 450.875         | 8              | CC1=NC(=C([C@@H]1C(=O)OC)c2ccc(c2)N+([=O])O-)C1C(=O)OC(C@H)3CCC03)C                    |
| ZINC08439582 | 4.71  | 0.57              | -11.09           | 0        | 9           | 0      | 450.875         | 8              | CC1=NC(=C)C([C@@H]1C(=O)OC)C@H2CCC02)c3ccc(c3)N+([=O])O-)C1C(=O)OC                     |
| ZINC08439582 | 4.71  | 1.81              | -18.84           | 0        | 9           | 0      | 450.875         | 8              | CC1=NC(=C)C([C@@H]1C(=O)OC)C@H2CCC02)c3ccc(c3)N+([=O])O-)C1C(=O)OC                     |
| ZINC08439582 | 4.53  | 0.61              | -12.23           | 0        | 9           | 0      | 450.875         | 8              | CC1=NC(=C([C@@H]1C(=O)OC)C@H2CCC02)c3ccc(c3)N+([=O])O-)C1C(=O)OC                       |
| ZINC02170759 | 8.31  | 1.88              | -8.32            | 0        | 3           | 0      | 447.431         | 8              | CCCC(=O)N(c1ccc(c1)C)C)c2nc(c2)CC)c3ccc3                                               |
| ZINC08439581 | 4.53  | 0.4               | -12.17           | 0        | 9           | 0      | 450.875         | 8              | CC1=NC(=C([C@@H]1C(=O)OC)c2ccc(c2)N+([=O])O-)C1C(=O)OC(C@H)3CCC03)C                    |
| ZINC08439581 | 4.71  | 0.4               | -10.39           | 0        | 9           | 0      | 450.875         | 8              | CC1=NC(=C)C([C@@H]1C(=O)OC)C@H2CCC02)c3ccc(c3)N+([=O])O-)C1C(=O)OC                     |
| ZINC08439581 | 4.71  | 1.7               | -12.65           | 0        | 9           | 0      | 450.875         | 8              | CC1=NC(=C)C([C@@H]1C(=O)OC)C@H2CCC02)c3ccc(c3)N+([=O])O-)C1C(=O)OC                     |
| ZINC08439581 | 4.53  | 0.31              | -11.14           | 0        | 9           | 0      | 450.875         | 8              | CC1=NC(=C([C@@H]1C(=O)OC)C@H2CCC02)c3ccc(c3)N+([=O])O-)C1C(=O)OC                       |
| ZINC02170755 | 7.5   | 1.13              | -7.92            | 0        | 3           | 0      | 463.828         | 6              | CCCC(=O)N(c1ccc(cc1)Br)c2nc(c2)CC)c3ccc(cc3)C                                          |
| ZINC08439580 | 4.53  | 0.43              | -10.04           | 0        | 9           | 0      | 450.875         | 8              | CC1=NC(=C([C@@H]1C(=O)OC)c2ccc(c2)N+([=O])O-)C1C(=O)OC(C@H)3CCC03)C                    |
| ZINC08439580 | 4.71  | 0.42              | -9.65            | 0        | 9           | 0      | 450.875         | 8              | CC1=NC(=C)C([C@@H]1C(=O)OC)C@H2CCC02)c3ccc(c3)N+([=O])O-)C1C(=O)OC                     |
| ZINC08439580 | 4.71  | 1.91              | -15.85           | 0        | 9           | 0      | 450.875         | 8              | CC1=NC(=C)C([C@@H]1C(=O)OC)C@H2CCC02)c3ccc(c3)N+([=O])O-)C1C(=O)OC                     |
| ZINC08439580 | 4.53  | 0.3               | -10.25           | 0        | 9           | 0      | 450.875         | 8              | CC1=NC(=C([C@@H]1C(=O)OC)C@H2CCC02)c3ccc(c3)N+([=O])O-)C1C(=O)OC                       |
| ZINC08439579 | 5.44  | 2.92              | -12.51           | 0        | 6           | 0      | 473.569         | 8              | CC1=NC2=C([C@@H]1C(=O)OC)c3ccc3c4ccc(cc4)OC(=O)C1C(=O)OC(C2)C                          |
| ZINC08439579 | 5.62  | 3.35              | -13.1            | 0        | 6           | 0      | 473.569         | 8              | CC(=O)O1ccc(cc1)C@H2C3C=NC(=C)C2C(=O)OCc4ccc4C(C3=O)C                                  |
| ZINC08439579 | 5.62  | 4.33              | -15.75           | 0        | 6           | 0      | 473.569         | 8              | CC(=O)O1ccc(cc1)C@H2C3C=NC(=C)C2C(=O)OCc4ccc4C(C3=O)C                                  |
| ZINC08439579 | 5.44  | 3.19              | -15.07           | 0        | 6           | 0      | 473.569         | 8              | CC1=C([C@@H]1C(=O)OC)C2C(=O)OCc3ccc3C1OC(=O)C1C(=O)OCc4ccc4                            |
| ZINC02170752 | 7.25  | 1.26              | -10.33           | 0        | 4           | 0      | 507.453         | 7              | Cc1c(nc(s1)N(c2ccc(cc2)Br)C(=O)C3CCCC3)c4ccc(cc4)OC                                    |
| ZINC08439578 | 4.53  | 0.32              | -9.37            | 0        | 9           | 0      | 450.875         | 8              | CC1=NC(=C([C@@H]1C(=O)OC)c2ccc(c2)N+([=O])O-)C1C(=O)OC(C@H)3CCC03)C                    |
| ZINC08439578 | 4.71  | 0.36              | -8.95            | 0        | 9           | 0      | 450.875         | 8              | CC1=NC(=C)C([C@@H]1C(=O)OC)C@H2CCC02)c3ccc(c3)N+([=O])O-)C1C(=O)OC                     |
| ZINC08439578 | 4.71  | 1.67              | -9.59            | 0        | 9           | 0      | 450.875         | 8              | CC1=NC(=C)C([C@@H]1C(=O)OC)C@H2CCC02)c3ccc(c3)N+([=O])O-)C1C(=O)OC                     |
| ZINC08439578 | 4.53  | 0.41              | -9.46            | 0        | 9           | 0      | 450.875         | 8              | CC1=NC(=C([C@@H]1C(=O)OC)C@H2CCC02)c3ccc(c3)N+([=O])O-)C1C(=O)OC                       |
| ZINC02170749 | 8.33  | 0.69              | -12.22           | 0        | 3           | 0      | 503.893         | 5              | Cc1c(nc(s1)N(c2ccc(cc2)Br)C(=O)C3CCCC3)c4ccc(cc4)OC                                    |
| ZINC08439577 | 5.44  | 3                 | -14.28           | 0        | 6           | 0      | 473.569         | 8              | CC1=NC2=C([C@@H]1C(=O)OC)c3ccc3c4ccc(cc4)OC(=O)C1C(=O)OC(C2)C                          |
| ZINC08439577 | 5.62  | 3.06              | -14.51           | 0        | 6           | 0      | 473.569         | 8              | CC(=O)O1ccc(cc1)C@H2C3C=NC(=C)C2C(=O)OCc4ccc4C(C3=O)C                                  |
| ZINC08439577 | 5.62  | 4.28              | -15.08           | 0        | 6           | 0      | 473.569         | 8              | CC(=O)O1ccc(cc1)C@H2C3C=NC(=C)C2C(=O)OCc4ccc4C(C3=O)C                                  |
| ZINC08439577 | 5.44  | 2.79              | -16.59           | 0        | 6           | 0      | 473.569         | 8              | CC1=C([C@@H]1C(=O)OC)C2C(=O)OCc3ccc3C1OC(=O)C1C(=O)OCc4ccc4                            |
| ZINC08439576 | 4.54  | -2.56             | -45.34           | 1        | 12          | 1      | 620.104         | 11             | CC1=NC(=C([C@@H]1C(=O)OC)c2ccc2N+([=O])O-)C1C(=O)OC(C@H)3CCN(CC3)S(=O)(=O)c4ccc(cc4)C1 |
| ZINC08439576 | 4.72  | -2.54             | -48.69           | 1        | 12          | 1      | 620.104         | 11             | CC1=NC(=C)C([C@@H]1C(=O)OC)C@H2CCN(CC2)S(=O)(=O)c3ccc(cc3)C1e4ccc4N+([=O])O-)C1C(=O)OC |
| ZINC08439576 | 4.72  | -1.18             | -45.66           | 1        | 12          | 1      | 620.104         | 11             | CC1=NC(=C)C([C@@H]1C(=O)OC)C@H2CCN(CC2)S(=O)(=O)c3ccc(cc3)C1e4ccc4N+([=O])O-)C1C(=O)OC |
| ZINC08439576 | 4.54  | -2.5              | -50.19           | 1        | 12          | 1      | 620.104         | 11             | CC1=NC(=C)C([C@@H]1C(=O)OC)C@H2CCN(CC2)S(=O)(=O)c3ccc(cc3)C1e4ccc4N+([=O])O-)C1C(=O)OC |
| ZINC02170744 | 7.72  | 2.06              | -10.67           | 0        | 4           | 0      | 497.447         | 7              | CC1c(nc(s1)N(c2ccc(cc2)Br)C(=O)C3CCCC3)c4ccc(cc4)OC                                    |
| ZINC08439575 | 4.54  | -2.65             | -57.72           | 1        | 12          | 1      | 620.104         | 11             | CC1=NC(=C([C@@H]1C(=O)OC)c2ccc2N+([=O])O-)C1C(=O)OC(C@H)3CCN(CC3)S(=O)(=O)c4ccc(cc4)C1 |
| ZINC08439575 | 4.72  | -2.41             | -61.63           | 1        | 12          | 1      | 620.104         | 11             | CC1=NC(=C)C([C@@H]1C(=O)OC)C@H2CCN(CC2)S(=O)(=O)c3ccc(cc3)C1e4ccc4N+([=O])O-)C1C(=O)OC |
| ZINC08439575 | 4.72  | -1.27             | -58.61           | 1        | 12          | 1      | 620.104         | 11             | CC1=NC(=C)C([C@@H]1C(=O)OC)C@H2CCN(CC2)S(=O)(=O)c3ccc(cc3)C1e4ccc4N+([=O])O-)C1C(=O)OC |
| ZINC08439575 | 4.54  | -2.57             | -65.41           | 1        | 12          | 1      | 620.104         | 11             | CC1=NC(=C([C@@H]1C(=O)OC)C@H2CCN(CC2)S(=O)(=O)c3ccc(cc3)C1e4ccc4N+([=O])O-)C1C(=O)OC   |
| ZINC08439574 | 5.61  | 1.26              | -11.25           | 0        | 6           | 0      | 468.638         | 11             | CCCCCOC(=O)C1C@H(C2=C(C(C(C2=O)C)N=C1)c3ccc(cc3)N)CC                                   |
| ZINC0643372  | 6.42  | 2.06              | -14.93           | 0        | 5           | 0      | 458.583         | 8              | Cc1c(nc(s1)N(c2ccc(cc2)Br)C(=O)C3CCCC3)c4ccc(cc4)OC                                    |
| ZINC08439573 | 4.99  | -2.45             | -56.13           | 1        | 12          | 1      | 620.104         | 11             | CC1=NC(=C([C@@H]1C(=O)OC)c2ccc(c2)N+([=O])O-)C1C(=O)OC(C@H)3CCN(CC3)S(=O)(=O)c4ccc4C1  |
| ZINC08439573 | 5.17  | -2.32             | -59.6            | 1        | 12          | 1      | 620.104         | 11             | CC1=NC(=C)C([C@@H]1C(=O)OC)C@H2CCN(CC2)S(=O)(=O)c3ccc(cc3)C1e4ccc4N+([=O])O-)C1C(=O)OC |
| ZINC08439573 | 5.17  | -1.1              | -55.06           | 1        | 12          | 1      | 620.104         | 11             | CC1=NC(=C)C([C@@H]1C(=O)OC)C@H2CCN(CC2)S(=O)(=O)c3ccc(cc3)C1e4ccc4N+([=O])O-)C1C(=O)OC |
| ZINC08439573 | 4.99  | -2.23             | -62.7            | 1        | 12          | 1      | 620.104         | 11             | CC1=NC(=C)C([C@@H]1C(=O)OC)C@H2CCN(CC2)S(=O)(=O)c3ccc(cc3)C1e4ccc4N+([=O])O-)C1C(=O)OC |
| ZINC02170739 | 7.69  | 2.19              | -12.88           | 0        | 3           | 0      | 442.987         | 5              | Cc1c(nc(s1)N(c2ccc(cc2)Br)C(=O)C3CCCC3)c4ccc(cc4)OC                                    |
| ZINC08439572 | 5.61  | 1.13              | -9.04            | 0        | 6           | 0      | 468.638         | 11             | CCCCCOC(=O)C1C@H(C2=C(C(C(C2=O)C)N=C1)c3ccc(cc3)N)CC                                   |
| ZINC08439571 | 4.99  | -2.44             | -51.59           | 1        | 12          | 1      | 620.104         | 11             | CC1=NC(=C([C@@H]1C(=O)OC)c2ccc2N+([=O])O-)C1C(=O)OC(C@H)3CCN(CC3)S(=O)(=O)c4ccc4C1     |
| ZINC08439571 | 5.17  | -2.27             | -56.36           | 1        | 12          | 1      | 620.104         | 11             | CC1=NC(=C)C([C@@H]1C(=O)OC)C@H2CCN(CC2)S(=O)(=O)c3ccc(cc3)C1e4ccc4N+([=O])O-)C1C(=O)OC |
| ZINC08439571 | 5.17  | -1.15             | -52.11           | 1        | 12          | 1      | 620.104         | 11             | CC1=NC(=C)C([C@@H]1C(=O)OC)C@H2CCN(CC2)S(=O)(=O)c3ccc(cc3)C1e4ccc4N+([=O])O-)C1C(=O)OC |
| ZINC08439571 | 4.99  | -2.5              | -56.56           | 1        | 12          | 1      | 620.104         | 11             | CC1=NC(=C([C@@H]1C(=O)OC)C@H2CCN(CC2)S(=O)(=O)c3ccc(cc3)C1e4ccc4N+([=O])O-)C1C(=O)OC   |
| ZINC0643366  | 6.34  | 2.23              | -16.68           | 0        | 4           | 0      | 428.557         | 7              | Cc1c(nc(s1)N(c2ccc(cc2)Br)C(=O)C3CCCC3)c4ccc(cc4)OC                                    |
| ZINC08439570 | 2.61  | 9.12              | -13.37           | 1        | 11          | 0      | 480.477         | 10             | CC1=NC(=C([C@@H]1C(=O)OC)c2ccc2N+([=O])O-)C1C(=O)OC(C@H)3CCN(CC3)S(=O)(=O)c4ccc4C1     |
| ZINC08439570 | 2.79  | 8.92              | -13.36           | 1        | 11          | 0      | 480.477         | 10             | CC1=NC(=C)C([C@@H]1C(=O)OC)C@H2CCN(CC2)S(=O)(=O)c3ccc(cc3)C1e4ccc4N+([=O])O-)C1C(=O)OC |
| ZINC08439570 | 2.79  | 9.85              | -13.99           | 1        | 11          | 0      | 480.477         | 10             | CC1=NC(=C)C([C@@H]1C(=O)OC)C@H2CCN(CC2)S(=O)(=O)c3ccc(cc3)C1e4ccc4N+([=O])O-)C1C(=O)OC |
| ZINC08439570 | 2.61  | 9.11              | -14.85           | 1        | 11          | 0      | 480.477         | 10             | CC1=NC(=C([C@@H]1C(=O)OC)C@H2CCN(CC2)S(=O)(=O)c3ccc(cc3)C1e4ccc4N+([=O])O-)C1C(=O)OC   |
| ZINC02170736 | 7.14  | 2.26              | -10.54           | 0        | 5           | 0      | 438.593         | 10             | CCCC(=O)N(c1ccc(cc1)C)C)c2nc(c2)CC)c3ccc(cc3)OC                                        |
| ZINC08439569 | 2.61  | -0.56             | -16.84           | 1        | 11          | 0      | 480.477         | 10             | CC1=NC(=C([C@@H]1C(=O)OC)c2ccc2N+([=O])O-)C1C(=O)OC(C@H)3CCN(CC3)S(=O)(=O)c4ccc4C1     |

Supplementary Table S2:

Detailed table of XP Docking using Schrodinger's Glide module

| ZINC_ID      | sLogP | ApolarDesolvation | PolarDesolvation | H Donors | H Acceptors | Charge | MolecularWeight | RotatableBonds | SMILES                                                                                     |
|--------------|-------|-------------------|------------------|----------|-------------|--------|-----------------|----------------|--------------------------------------------------------------------------------------------|
| ZINC08439569 | 2.79  | -0.28             | -17.29           | 1        | 11          | 0      | 480.477         | 10             | CC1=NC(=C)C(C@H)[C1C(=O)OCCNC(=O)e2ccnc2]c3ccccc3N+([=O])O-]C(=O)OC                        |
| ZINC08439569 | 2.79  | 0.8               | -18.5            | 1        | 11          | 0      | 480.477         | 10             | CC1=NC(=C)C(C@H)[C1C(=O)OCCNC(=O)e2ccnc2]c3ccccc3N+([=O])O-]C(=O)OC                        |
| ZINC08439569 | 2.61  | -0.4              | -18.96           | 1        | 11          | 0      | 480.477         | 10             | CC1=NC(=C)C(C@H)[C1C(=O)OCCNC(=O)e2ccnc2]c3ccccc3N+([=O])O-]C(=O)OC                        |
| ZINC00717199 | 4.89  | -1.17             | -12.42           | 1        | 4           | 0      | 468.372         | 6              | c1ccc(cc1)CCN2[C@H](C=C(C2=O))C(=O)c3ccccc3]4cccc(cc4)Br                                   |
| ZINC00717199 | 4.31  | -1.3              | -19.64           | 0        | 4           | 0      | 468.372         | 6              | c1ccc(cc1)CCN2[C@H](C@H)[C1C(=O)C2=O]C(=O)c3ccccc3]4cccc(cc4)Br                            |
| ZINC02170733 | 6.04  | 0.95              | -13.09           | 1        | 6           | 0      | 479.005         | 8              | CCOC1ccc(cc1)NC(=O)C@H(C)Sc2nnc(n2c3ccccc3]4cccc(cc4)Cl                                    |
| ZINC08439568 | 4.23  | 1.14              | -21.65           | 1        | 13          | 0      | 607.616         | 14             | CC1=NC(=C)C(C@H)[C1C(=O)OCCOC(=O)e2ccc(cc2)NC(=O)C]c3ccccc3N+([=O])O-]C(=O)OC[C@H]4CCCCO4C |
| ZINC08439568 | 4.41  | 1.12              | -20.35           | 1        | 13          | 0      | 607.616         | 14             | CC1=NC(=C)C(C@H)[C1C(=O)OCCOC(=O)e2ccc(cc2)NC(=O)C]c3ccccc3N+([=O])O-]C(=O)OC[C@H]4CCCCO4C |
| ZINC08439568 | 4.41  | 2.53              | -23.99           | 1        | 13          | 0      | 607.616         | 14             | CC1=NC(=C)C(C@H)[C1C(=O)OCCOC(=O)e2ccc(cc2)NC(=O)C]c3ccccc3N+([=O])O-]C(=O)OC[C@H]4CCCCO4C |
| ZINC08439568 | 4.23  | 0.98              | -19.89           | 1        | 13          | 0      | 607.616         | 14             | CC1=NC(=C)C(C@H)[C1C(=O)OCCOC(=O)e2ccc(cc2)NC(=O)C]c3ccccc3N+([=O])O-]C(=O)OC[C@H]4CCCCO4C |
| ZINC02170731 | 6.04  | 0.94              | -12.87           | 1        | 6           | 0      | 479.005         | 8              | CCOC1ccc(cc1)NC(=O)C@H(C)Sc2nnc(n2c3ccccc3]4cccc(cc4)Cl                                    |
| ZINC00717196 | 4.76  | -0.25             | -12.69           | 1        | 4           | 0      | 423.921         | 6              | c1ccc(cc1)CCN2[C@H](C=C(C2=O))C(=O)c3ccccc3]4cccc(cc4)Cl                                   |
| ZINC00717196 | 4.17  | -0.42             | -18.37           | 0        | 4           | 0      | 423.921         | 6              | c1ccc(cc1)CCN2[C@H](C@H)[C1C(=O)C2=O]C(=O)c3ccccc3]4cccc(cc4)Cl                            |
| ZINC00643364 | 6.34  | 1.74              | -12.27           | 0        | 5           | 0      | 436.577         | 6              | Cc1c(nc(s1)N)c2ccc(cc2)OC(C)C(=O)C3CCCC3]4cccc(cc4)Cl                                      |
| ZINC08439566 | 4.23  | 0.65              | -24.67           | 1        | 13          | 0      | 607.616         | 14             | CC1=NC(=C)C(C@H)[C1C(=O)OCCOC(=O)e2ccc(cc2)NC(=O)C]c3ccccc3N+([=O])O-]C(=O)OC[C@H]4CCCCO4C |
| ZINC08439566 | 4.41  | 0.58              | -22.4            | 1        | 13          | 0      | 607.616         | 14             | CC1=NC(=C)C(C@H)[C1C(=O)OCCOC(=O)e2ccc(cc2)NC(=O)C]c3ccccc3N+([=O])O-]C(=O)OC[C@H]4CCCCO4C |
| ZINC08439566 | 4.41  | 1.93              | -28.84           | 1        | 13          | 0      | 607.616         | 14             | CC1=NC(=C)C(C@H)[C1C(=O)OCCOC(=O)e2ccc(cc2)NC(=O)C]c3ccccc3N+([=O])O-]C(=O)OC[C@H]4CCCCO4C |
| ZINC08439566 | 4.23  | 0.47              | -23.37           | 1        | 13          | 0      | 607.616         | 14             | CC1=NC(=C)C(C@H)[C1C(=O)OCCOC(=O)e2ccc(cc2)NC(=O)C]c3ccccc3N+([=O])O-]C(=O)OC[C@H]4CCCCO4C |
| ZINC02170729 | 7.06  | 3                 | -13.59           | 0        | 4           | 0      | 460.574         | 8              | CCc1c(nc(s1)N)c2ccc(cc2)F(C)C(=O)C3CCCC3]4cccc(cc4)OC                                      |
| ZINC00717197 | 4.76  | -0.56             | -12.51           | 1        | 4           | 0      | 423.921         | 6              | c1ccc(cc1)CCN2[C@H](C=C(C2=O))C(=O)c3ccccc3]4cccc(cc4)Cl                                   |
| ZINC00717197 | 4.17  | -0.69             | -19.73           | 0        | 4           | 0      | 423.921         | 6              | c1ccc(cc1)CCN2[C@H](C@H)[C1C(=O)C2=O]C(=O)c3ccccc3]4cccc(cc4)Cl                            |
| ZINC08439565 | 4.23  | 0.46              | -23.99           | 1        | 13          | 0      | 607.616         | 14             | CC1=NC(=C)C(C@H)[C1C(=O)OCCOC(=O)e2ccc(cc2)NC(=O)C]c3ccccc3N+([=O])O-]C(=O)OC[C@H]4CCCCO4C |
| ZINC08439565 | 4.41  | 0.42              | -24.42           | 1        | 13          | 0      | 607.616         | 14             | CC1=NC(=C)C(C@H)[C1C(=O)OCCOC(=O)e2ccc(cc2)NC(=O)C]c3ccccc3N+([=O])O-]C(=O)OC[C@H]4CCCCO4C |
| ZINC08439565 | 4.41  | 1.7               | -27.47           | 1        | 13          | 0      | 607.616         | 14             | CC1=NC(=C)C(C@H)[C1C(=O)OCCOC(=O)e2ccc(cc2)NC(=O)C]c3ccccc3N+([=O])O-]C(=O)OC[C@H]4CCCCO4C |
| ZINC08439565 | 4.23  | 0.29              | -23.71           | 1        | 13          | 0      | 607.616         | 14             | CC1=NC(=C)C(C@H)[C1C(=O)OCCOC(=O)e2ccc(cc2)NC(=O)C]c3ccccc3N+([=O])O-]C(=O)OC[C@H]4CCCCO4C |
| ZINC02170722 | 6.97  | 16.32             | -12.11           | 0        | 3           | 0      | 430.548         | 6              | CCc1c(nc(s1)N)c2ccc(cc2)F(C)C(=O)C3CCCC3]4cccc(cc4)C                                       |
| ZINC08439564 | 7.18  | -0.5              | -23.59           | 2        | 11          | 0      | 597.624         | 13             | CC1=NC(=C)C(C@H)[C1C(=O)OCCNC(=O)e2ccc(cc2)O]c3ccc(cc3)N+([=O])O-]C(=O)OC/C=C/e4cccc4C     |
| ZINC08439564 | 7.37  | -0.31             | -20.9            | 2        | 11          | 0      | 597.624         | 13             | CC1=NC(=C)C(C@H)[C1C(=O)OCCNC(=O)e2ccc(cc2)O]c3ccc(cc3)N+([=O])O-]C(=O)OC/C=C/e4cccc4C     |
| ZINC08439564 | 7.37  | 0.85              | -24.78           | 2        | 11          | 0      | 597.624         | 13             | CC1=NC(=C)C(C@H)[C1C(=O)OCCNC(=O)e2ccc(cc2)O]c3ccc(cc3)N+([=O])O-]C(=O)OC/C=C/e4cccc4C     |
| ZINC08439564 | 7.18  | -0.39             | -21.77           | 2        | 11          | 0      | 597.624         | 13             | CC1=NC(=C)C(C@H)[C1C(=O)OCCNC(=O)e2ccc(cc2)O]c3ccc(cc3)N+([=O])O-]C(=O)OC/C=C/e4cccc4C     |
| ZINC00643360 | 3.82  | 1.06              | -18.19           | 1        | 8           | 0      | 462.579         | 8              | Cc1c(c(c(n1)N)C)Nc2ccc(cc2)Sc2nnc(n2c3ccccc3]4cccc(cc4)OC                                  |
| ZINC08439562 | 5.31  | 2.23              | -7.03            | 0        | 4           | 0      | 447.478         | 5              | CC1=NC2=C(C@H)[C1C(=O)OCC]c3ccc(cc3)C(F)F(F)F(C)C(=O)C@H(C)C2e4cccc4                       |
| ZINC08439562 | 5.5   | 2.34              | -8.03            | 0        | 4           | 0      | 447.478         | 5              | CO(C=O)C1C@H(C)C2C(=NC1=C)C(C@H)(CC2=O)c3ccccc3]4cccc(cc4)C(F)F(F)                         |
| ZINC08439562 | 5.5   | 3.65              | -9.97            | 0        | 4           | 0      | 447.478         | 5              | CO(C=O)C1C@H(C)C2C(=NC1=C)C(C@H)(CC2=O)c3ccccc3]4cccc(cc4)C(F)F(F)                         |
| ZINC08439562 | 5.31  | 2.17              | -9.49            | 0        | 4           | 0      | 447.478         | 5              | CC1=C(C@H)[C1C(=O)OCC]c2ccc(cc2)C(C)C(F)F(F)F(C)C(=O)OC                                    |
| ZINC08439561 | 4.37  | -0.49             | -56.57           | 3        | 12          | 1      | 553.592         | 13             | CC1=NC(=C)C(C@H)[C1C(=O)OCCNC(=O)e2ccc(cc2)O]c3ccc(cc3)N+([=O])O-]C(=O)OCCNH+](C)C         |
| ZINC08439561 | 4.55  | -0.25             | -59.67           | 3        | 12          | 1      | 553.592         | 13             | CC1=NC(=C)C(C@H)[C1C(=O)OCCNC(=O)e2ccc(cc2)O]c3ccc(cc3)N+([=O])O-]C(=O)OCCNH+](C)C         |
| ZINC08439561 | 4.55  | 0.87              | -58.47           | 3        | 12          | 1      | 553.592         | 13             | CC1=NC(=C)C(C@H)[C1C(=O)OCCNC(=O)e2ccc(cc2)O]c3ccc(cc3)N+([=O])O-]C(=O)OCCNH+](C)C         |
| ZINC08439561 | 4.37  | -0.33             | -62.19           | 3        | 12          | 1      | 553.592         | 13             | CC1=NC(=C)C(C@H)[C1C(=O)OCCNC(=O)e2ccc(cc2)O]c3ccc(cc3)N+([=O])O-]C(=O)OCCNH+](C)C         |
| ZINC02170719 | 5.7   | 1.13              | -16.1            | 1        | 6           | 0      | 463.632         | 7              | C(C@H)[C1C(=O)Nc1nc(s1)Sc2nnc(n2c3ccccc3]4cccc(cc4)C(C)C                                   |
| ZINC08439560 | 4.37  | -0.16             | -40.91           | 3        | 12          | 1      | 553.592         | 13             | CC1=NC(=C)C(C@H)[C1C(=O)OCCNC(=O)e2ccc(cc2)O]c3ccc(cc3)N+([=O])O-]C(=O)OCCNH+](C)C         |
| ZINC08439560 | 4.55  | -0.13             | -43.24           | 3        | 12          | 1      | 553.592         | 13             | CC1=NC(=C)C(C@H)[C1C(=O)OCCNC(=O)e2ccc(cc2)O]c3ccc(cc3)N+([=O])O-]C(=O)OCCNH+](C)C         |
| ZINC08439560 | 4.55  | 1.26              | -45.26           | 3        | 12          | 1      | 553.592         | 13             | CC1=NC(=C)C(C@H)[C1C(=O)OCCNC(=O)e2ccc(cc2)O]c3ccc(cc3)N+([=O])O-]C(=O)OCCNH+](C)C         |
| ZINC08439559 | 3.92  | -3.69             | -24.41           | 3        | 14          | 0      | 629.626         | 14             | CC1=NC(=C)C(C@H)[C1C(=O)OCCNC(=O)e2ccc(cc2)O]c3ccc(cc3)N+([=O])O-]C(=O)OCCNC(=O)e4cccc4C   |
| ZINC08439559 | 4.1   | -3.7              | -23.86           | 3        | 14          | 0      | 629.626         | 14             | CC1=NC(=C)C(C@H)[C1C(=O)OCCNC(=O)e2ccc(cc2)O]c3ccc(cc3)N+([=O])O-]C(=O)OCCNC(=O)e4cccc4C   |
| ZINC08439559 | 4.1   | -2.17             | -31.71           | 3        | 14          | 0      | 629.626         | 14             | CC1=NC(=C)C(C@H)[C1C(=O)OCCNC(=O)e2ccc(cc2)O]c3ccc(cc3)N+([=O])O-]C(=O)OCCNC(=O)e4cccc4C   |
| ZINC08439559 | 3.92  | -3.7              | -24.93           | 3        | 14          | 0      | 629.626         | 14             | CC1=NC(=C)C(C@H)[C1C(=O)OCCNC(=O)e2ccc(cc2)O]c3ccc(cc3)N+([=O])O-]C(=O)OCCNC(=O)e4cccc4C   |
| ZINC02170717 | 5.7   | 1.14              | -16.04           | 1        | 6           | 0      | 463.632         | 7              | C(C@H)[C1C(=O)Nc1nc(s1)Sc2nnc(n2c3ccccc3]4cccc(cc4)C(C)C                                   |
| ZINC08439558 | 5.31  | 2.11              | -7.56            | 0        | 4           | 0      | 447.478         | 5              | CC1=NC2=C(C@H)[C1C(=O)OCC]c3ccc(cc3)C(F)F(F)F(C)C(=O)C@H(C)C2e4cccc4                       |
| ZINC08439558 | 5.5   | 2.2               | -8.03            | 0        | 4           | 0      | 447.478         | 5              | CO(C=O)C1C@H(C)C2C(=NC1=C)C(C@H)(CC2=O)c3ccccc3]4cccc(cc4)C(F)F(F)                         |
| ZINC08439558 | 5.5   | 3.26              | -7.98            | 0        | 4           | 0      | 447.478         | 5              | CO(C=O)C1C@H(C)C2C(=NC1=C)C(C@H)(CC2=O)c3ccccc3]4cccc(cc4)C(F)F(F)                         |
| ZINC08439558 | 5.31  | 2.25              | -9.4             | 0        | 4           | 0      | 447.478         | 5              | CC1=C(C@H)[C1C(=O)OCC]c2ccc(cc2)C(C)C(F)F(F)F(C)C(=O)OC                                    |
| ZINC02170714 | 7.98  | 1.52              | -12.23           | 0        | 4           | 0      | 469.05          | 7              | Cc1c(nc(s1)N)c2ccc(cc2)C(C)C(=O)C3CCCC3]4cccc(cc4)OC                                       |
| ZINC00643358 | 5.07  | 10.6              | -18.75           | 2        | 8           | 0      | 514.607         | 11             | COc1ccc(cc1)e2nnc(n2CC=C)SCC(=O)NCC3ccc(cc3)C(=O)e4cccc4                                   |
| ZINC08439557 | 3.92  | -3.56             | -26.15           | 3        | 14          | 0      | 629.626         | 14             | CC1=NC(=C)C(C@H)[C1C(=O)OCCNC(=O)e2ccc(cc2)O]c3ccc(cc3)N+([=O])O-]C(=O)OCCNC(=O)e4cccc4C   |
| ZINC08439557 | 4.1   | -3.43             | -25.31           | 3        | 14          | 0      | 629.626         | 14             | CC1=NC(=C)C(C@H)[C1C(=O)OCCNC(=O)e2ccc(cc2)O]c3ccc(cc3)N+([=O])O-]C(=O)OCCNC(=O)e4cccc4C   |
| ZINC08439557 | 4.1   | -2.33             | -26.7            | 3        | 14          | 0      | 629.626         | 14             | CC1=NC(=C)C(C@H)[C1C(=O)OCCNC(=O)e2ccc(cc2)O]c3ccc(cc3)N+([=O])O-]C(=O)OCCNC(=O)e4cccc4C   |
| ZINC08439557 | 3.92  | -3.57             | -26.38           | 3        | 14          | 0      | 629.626         | 14             | CC1=NC(=C)C(C@H)[C1C(=O)OCCNC(=O)e2ccc(cc2)O]c3ccc(cc3)N+([=O])O-]C(=O)OCCNC(=O)e4cccc4C   |
| ZINC08439556 | 4.01  | 0.56              | -44.18           | 2        | 6           | 1      | 436.919         | 4              | CC1C@H]1C@H]2C@H(C)C(=O)N(C2=O)c3ccc(cc3)C(C)C@H]4(NH2+1)c5cccc5N(C4=O)CC=C                |
| ZINC08439555 | 4.71  | -1.9              | -16.82           | 2        | 12          | 0      | 565.579         | 12             | CC1=NC(=C)C(C@H)[C1C(=O)OCCNC(=O)e2ccc(cc2)O]c3ccc(cc3)N+([=O])O-]C(=O)OC[C@H]4CCCCO4C     |
| ZINC08439555 | 4.89  | -1.89             | -16.05           | 2        | 12          | 0      | 565.579         | 12             | CC1=NC(=C)C(C@H)[C1C(=O)OCCNC(=O)e2ccc(cc2)O]c3ccc(cc3)N+([=O])O-]C(=O)OC[C@H]4CCCCO4C     |



Supplementary Table S2:

Detailed table of XP Docking using Schrodinger's Glide module

| ZINC_ID      | xLogP | ApolarDesolvation | PolarDesolvation | H Donors | H Acceptors | Charge | MolecularWeight | RotatableBonds | SMILES                                                                                      |
|--------------|-------|-------------------|------------------|----------|-------------|--------|-----------------|----------------|---------------------------------------------------------------------------------------------|
| ZINC08439555 | 4.89  | -0.48             | -18.95           | 2        | 12          | 0      | 565.579         | 12             | CC1=NC(=C)C(C@H)1C(=O)OC(C@H)2CCO2)c3ccc3N+([=O])O-]C(=O)OCCNC(=O)c4cccc4O                  |
| ZINC08439555 | 4.71  | -2                | -16.35           | 2        | 12          | 0      | 565.579         | 12             | CC1=NC(=C)C(C@H)1C(=O)OC(C@H)2CCO2)c3ccc3N+([=O])O-]C(=O)OCCNC(=O)c4cccc4O                  |
| ZINC08439554 | 4.01  | 0.5               | -43.24           | 2        | 6           | 1      | 436.919         | 4              | CC(C@H)1C(=O)OC(C@H)1C(=O)OC(C@H)2CCO2)c3ccc3N+([=O])O-]C(=O)OCCNC(=O)c4cccc4O              |
| ZINC08439553 | 5.31  | 2.21              | -7.21            | 0        | 4           | 0      | 447.478         | 5              | CC1=NC2=C(C(=O)OC(C@H)1C(=O)OC(C@H)2CCO2)c3ccc3N+([=O])O-]C(=O)OCCNC(=O)c4cccc4O            |
| ZINC08439553 | 5.5   | 2.35              | -7.95            | 0        | 4           | 0      | 447.478         | 5              | COC(=O)C1C@H1(C2C(=NC1=C)C(C@H)1C(=O)OC(C@H)2CCO2)c3ccc3N+([=O])O-]C(=O)OCCNC(=O)c4cccc4O   |
| ZINC08439553 | 5.5   | 3.6               | -9.1             | 0        | 4           | 0      | 447.478         | 5              | COC(=O)C1C@H1(C2C(=NC1=C)C(C@H)1C(=O)OC(C@H)2CCO2)c3ccc3N+([=O])O-]C(=O)OCCNC(=O)c4cccc4O   |
| ZINC08439553 | 5.31  | 2.22              | -9.81            | 0        | 4           | 0      | 447.478         | 5              | CC1=C(C(=O)OC(C@H)1C(=O)OC(C@H)2CCO2)c3ccc3N+([=O])O-]C(=O)OCCNC(=O)c4cccc4O                |
| ZINC08439552 | 4.71  | -2.57             | -22.93           | 2        | 12          | 0      | 565.579         | 12             | CC1=NC(=C)C(C@H)1C(=O)OC(C@H)2CCO2)c3ccc3N+([=O])O-]C(=O)OCCNC(=O)c4cccc4O                  |
| ZINC08439552 | 4.89  | -2.45             | -19.8            | 2        | 12          | 0      | 565.579         | 12             | CC1=NC(=C)C(C@H)1C(=O)OC(C@H)2CCO2)c3ccc3N+([=O])O-]C(=O)OCCNC(=O)c4cccc4O                  |
| ZINC08439552 | 4.89  | -1.04             | -38.28           | 2        | 12          | 0      | 565.579         | 12             | CC1=NC(=C)C(C@H)1C(=O)OC(C@H)2CCO2)c3ccc3N+([=O])O-]C(=O)OCCNC(=O)c4cccc4O                  |
| ZINC08439552 | 4.71  | -2.54             | -20.9            | 2        | 12          | 0      | 565.579         | 12             | CC1=NC(=C)C(C@H)1C(=O)OC(C@H)2CCO2)c3ccc3N+([=O])O-]C(=O)OCCNC(=O)c4cccc4O                  |
| ZINC08439550 | 4.71  | -2.27             | -22.79           | 2        | 12          | 0      | 565.579         | 12             | CC1=NC(=C)C(C@H)1C(=O)OC(C@H)2CCO2)c3ccc3N+([=O])O-]C(=O)OCCNC(=O)c4cccc4O                  |
| ZINC08439550 | 4.89  | -2.33             | -19.79           | 2        | 12          | 0      | 565.579         | 12             | CC1=NC(=C)C(C@H)1C(=O)OC(C@H)2CCO2)c3ccc3N+([=O])O-]C(=O)OCCNC(=O)c4cccc4O                  |
| ZINC08439550 | 4.89  | -0.98             | -27.43           | 2        | 12          | 0      | 565.579         | 12             | CC1=NC(=C)C(C@H)1C(=O)OC(C@H)2CCO2)c3ccc3N+([=O])O-]C(=O)OCCNC(=O)c4cccc4O                  |
| ZINC08439550 | 4.71  | -2.44             | -20.69           | 2        | 12          | 0      | 565.579         | 12             | CC1=NC(=C)C(C@H)1C(=O)OC(C@H)2CCO2)c3ccc3N+([=O])O-]C(=O)OCCNC(=O)c4cccc4O                  |
| ZINC08439548 | 4.71  | -2.33             | -23.61           | 2        | 12          | 0      | 565.579         | 12             | CC1=NC(=C)C(C@H)1C(=O)OC(C@H)2CCO2)c3ccc3N+([=O])O-]C(=O)OCCNC(=O)c4cccc4O                  |
| ZINC08439548 | 4.89  | -2.2              | -21.15           | 2        | 12          | 0      | 565.579         | 12             | CC1=NC(=C)C(C@H)1C(=O)OC(C@H)2CCO2)c3ccc3N+([=O])O-]C(=O)OCCNC(=O)c4cccc4O                  |
| ZINC08439548 | 4.89  | -0.82             | -38.44           | 2        | 12          | 0      | 565.579         | 12             | CC1=NC(=C)C(C@H)1C(=O)OC(C@H)2CCO2)c3ccc3N+([=O])O-]C(=O)OCCNC(=O)c4cccc4O                  |
| ZINC08439548 | 4.71  | -2.29             | -22.63           | 2        | 12          | 0      | 565.579         | 12             | CC1=NC(=C)C(C@H)1C(=O)OC(C@H)2CCO2)c3ccc3N+([=O])O-]C(=O)OCCNC(=O)c4cccc4O                  |
| ZINC08439546 | 5.31  | 2.21              | -7.06            | 0        | 4           | 0      | 447.478         | 5              | CC1=NC2=C(C(=O)OC(C@H)1C(=O)OC(C@H)2CCO2)c3ccc3N+([=O])O-]C(=O)OCCNC(=O)c4cccc4O            |
| ZINC08439546 | 5.5   | 2.28              | -7.79            | 0        | 4           | 0      | 447.478         | 5              | COC(=O)C1C@H1(C2C(=NC1=C)C(C@H)1C(=O)OC(C@H)2CCO2)c3ccc3N+([=O])O-]C(=O)OCCNC(=O)c4cccc4O   |
| ZINC08439546 | 5.5   | 3.59              | -8.6             | 0        | 4           | 0      | 447.478         | 5              | COC(=O)C1C@H1(C2C(=NC1=C)C(C@H)1C(=O)OC(C@H)2CCO2)c3ccc3N+([=O])O-]C(=O)OCCNC(=O)c4cccc4O   |
| ZINC08439546 | 5.31  | 2.15              | -9.78            | 0        | 4           | 0      | 447.478         | 5              | COC(=O)C1C@H1(C2C(=NC1=C)C(C@H)1C(=O)OC(C@H)2CCO2)c3ccc3N+([=O])O-]C(=O)OCCNC(=O)c4cccc4O   |
| ZINC08439544 | 6.68  | 1.26              | -20.03           | 1        | 11          | 0      | 611.651         | 14             | CC1=NC(=C)C(C@H)1C(=O)OC(C@H)2CCO2)c3ccc3N+([=O])O-]C(=O)OCCNC(=O)c4cccc4O                  |
| ZINC08439544 | 6.86  | 1.44              | -19.63           | 1        | 11          | 0      | 611.651         | 14             | CC1=NC(=C)C(C@H)1C(=O)OC(C@H)2CCO2)c3ccc3N+([=O])O-]C(=O)OCCNC(=O)c4cccc4O                  |
| ZINC08439544 | 6.86  | 2.61              | -21.64           | 1        | 11          | 0      | 611.651         | 14             | CC1=NC(=C)C(C@H)1C(=O)OC(C@H)2CCO2)c3ccc3N+([=O])O-]C(=O)OCCNC(=O)c4cccc4O                  |
| ZINC08439544 | 6.68  | 1.32              | -20.18           | 1        | 11          | 0      | 611.651         | 14             | CC1=NC(=C)C(C@H)1C(=O)OC(C@H)2CCO2)c3ccc3N+([=O])O-]C(=O)OCCNC(=O)c4cccc4O                  |
| ZINC03050684 | 3.07  | 10.89             | -43.85           | 2        | 4           | 1      | 342.438         | 6              | CC1=NC(=C)C(C@H)1C(=O)OC(C@H)2CCO2)c3ccc3N+([=O])O-]C(=O)OCCNC(=O)c4cccc4O                  |
| ZINC08439543 | 6.68  | 1.25              | -20.94           | 1        | 11          | 0      | 611.651         | 14             | CC1=NC(=C)C(C@H)1C(=O)OC(C@H)2CCO2)c3ccc3N+([=O])O-]C(=O)OCCNC(=O)c4cccc4O                  |
| ZINC08439543 | 6.86  | 1.29              | -20.14           | 1        | 11          | 0      | 611.651         | 14             | CC1=NC(=C)C(C@H)1C(=O)OC(C@H)2CCO2)c3ccc3N+([=O])O-]C(=O)OCCNC(=O)c4cccc4O                  |
| ZINC08439543 | 6.86  | 2.7               | -30.1            | 1        | 11          | 0      | 611.651         | 14             | CC1=NC(=C)C(C@H)1C(=O)OC(C@H)2CCO2)c3ccc3N+([=O])O-]C(=O)OCCNC(=O)c4cccc4O                  |
| ZINC08439543 | 6.68  | 1.33              | -20.24           | 1        | 11          | 0      | 611.651         | 14             | CC1=NC(=C)C(C@H)1C(=O)OC(C@H)2CCO2)c3ccc3N+([=O])O-]C(=O)OCCNC(=O)c4cccc4O                  |
| ZINC08439542 | 3.14  | -0.1              | -51.32           | 2        | 12          | 1      | 538.581         | 13             | CC1=NC(=C)C(C@H)1C(=O)OC(C@H)2CCO2)c3ccc3N+([=O])O-]C(=O)OCCNC(=O)c4cccc4O                  |
| ZINC08439542 | 3.32  | -0.09             | -53.37           | 2        | 12          | 1      | 538.581         | 13             | CC1=NC(=C)C(C@H)1C(=O)OC(C@H)2CCO2)c3ccc3N+([=O])O-]C(=O)OCCNC(=O)c4cccc4O                  |
| ZINC08439542 | 3.32  | 1.25              | -52.27           | 2        | 12          | 1      | 538.581         | 13             | CC1=NC(=C)C(C@H)1C(=O)OC(C@H)2CCO2)c3ccc3N+([=O])O-]C(=O)OCCNC(=O)c4cccc4O                  |
| ZINC08439542 | 3.14  | -0.05             | -57.87           | 2        | 12          | 1      | 538.581         | 13             | CC1=NC(=C)C(C@H)1C(=O)OC(C@H)2CCO2)c3ccc3N+([=O])O-]C(=O)OCCNC(=O)c4cccc4O                  |
| ZINC02170707 | 5.8   | 1.25              | -16.92           | 0        | 5           | 0      | 456.567         | 6              | COC1ccc1n2c(=O)c3ccc3nc2CC(=O)c4ccc4C                                                       |
| ZINC08439541 | 3.14  | 0.14              | -46.13           | 2        | 12          | 1      | 538.581         | 13             | CC1=NC(=C)C(C@H)1C(=O)OC(C@H)2CCO2)c3ccc3N+([=O])O-]C(=O)OCCNC(=O)c4cccc4O                  |
| ZINC08439541 | 3.32  | 0.39              | -50.06           | 2        | 12          | 1      | 538.581         | 13             | CC1=NC(=C)C(C@H)1C(=O)OC(C@H)2CCO2)c3ccc3N+([=O])O-]C(=O)OCCNC(=O)c4cccc4O                  |
| ZINC08439541 | 3.32  | 1.39              | -46.53           | 2        | 12          | 1      | 538.581         | 13             | CC1=NC(=C)C(C@H)1C(=O)OC(C@H)2CCO2)c3ccc3N+([=O])O-]C(=O)OCCNC(=O)c4cccc4O                  |
| ZINC08439541 | 3.14  | 0.27              | -51.85           | 2        | 12          | 1      | 538.581         | 13             | CC1=NC(=C)C(C@H)1C(=O)OC(C@H)2CCO2)c3ccc3N+([=O])O-]C(=O)OCCNC(=O)c4cccc4O                  |
| ZINC02170705 | 6.22  | 0.7               | -11.54           | 1        | 6           | 0      | 513.45          | 9              | CC1=NC(=C)C(C@H)1C(=O)OC(C@H)2CCO2)c3ccc3N+([=O])O-]C(=O)OCCNC(=O)c4cccc4O                  |
| ZINC02170703 | 7.92  | 1.54              | -7.64            | 0        | 3           | 0      | 453.822         | 6              | CC1=NC(=C)C(C@H)1C(=O)OC(C@H)2CCO2)c3ccc3N+([=O])O-]C(=O)OCCNC(=O)c4cccc4O                  |
| ZINC08439540 | 5.38  | -2.33             | -62.51           | 1        | 12          | 1      | 634.131         | 12             | CCOC(=O)C1C@H1(C2C(=NC1=C)C(C@H)1C(=O)OC(C@H)2CCO2)c3ccc3N+([=O])O-]C(=O)OCCNC(=O)c4cccc4O  |
| ZINC08439540 | 5.38  | -2.49             | -71.06           | 1        | 12          | 1      | 634.131         | 12             | CCOC(=O)C1C@H1(C2C(=NC1=C)C(C@H)1C(=O)OC(C@H)2CCO2)c3ccc3N+([=O])O-]C(=O)OCCNC(=O)c4cccc4O  |
| ZINC08439540 | 5.57  | -3.39             | -69.88           | 1        | 12          | 1      | 634.131         | 12             | CCOC(=O)C1C@H1(C2C(=NC1=C)C(C@H)1C(=O)OC(C@H)2CCO2)c3ccc3N+([=O])O-]C(=O)OCCNC(=O)c4cccc4O  |
| ZINC02170700 | 7.76  | 1.99              | -9.46            | 0        | 4           | 0      | 443.012         | 9              | CCOC(=O)C1C@H1(C2C(=NC1=C)C(C@H)1C(=O)OC(C@H)2CCO2)c3ccc3N+([=O])O-]C(=O)OCCNC(=O)c4cccc4O  |
| ZINC08439539 | 2.95  | -0.32             | -51.6            | 1        | 12          | 1      | 462.595         | 7              | CSCC1C@H1(C2C(=NC1=C)C(C@H)1C(=O)OC(C@H)2CCO2)c3ccc3N+([=O])O-]C(=O)OCCNC(=O)c4cccc4O       |
| ZINC08439538 | 5.38  | -2.44             | -56.44           | 1        | 12          | 1      | 634.131         | 12             | CCOC(=O)C1C@H1(C2C(=NC1=C)C(C@H)1C(=O)OC(C@H)2CCO2)c3ccc3N+([=O])O-]C(=O)OCCNC(=O)c4cccc4O  |
| ZINC08439538 | 5.38  | -2.41             | -66.97           | 1        | 12          | 1      | 634.131         | 12             | CCOC(=O)C1C@H1(C2C(=NC1=C)C(C@H)1C(=O)OC(C@H)2CCO2)c3ccc3N+([=O])O-]C(=O)OCCNC(=O)c4cccc4O  |
| ZINC08439538 | 5.57  | -3.54             | -62.7            | 1        | 12          | 1      | 634.131         | 12             | CCOC(=O)C1C@H1(C2C(=NC1=C)C(C@H)1C(=O)OC(C@H)2CCO2)c3ccc3N+([=O])O-]C(=O)OCCNC(=O)c4cccc4O  |
| ZINC08439537 | 3.82  | 2.37              | -120.2           | 2        | 10          | 2      | 474.558         | 10             | CCOC(=O)C1C@H1(C2C(=NC1=C)C(C@H)1C(=O)OC(C@H)2CCO2)c3ccc3N+([=O])O-]C(=O)OCCNC(=O)c4cccc4O  |
| ZINC08439537 | 3.82  | 2.13              | -125             | 2        | 10          | 2      | 474.558         | 10             | CCOC(=O)C1C@H1(C2C(=NC1=C)C(C@H)1C(=O)OC(C@H)2CCO2)c3ccc3N+([=O])O-]C(=O)OCCNC(=O)c4cccc4O  |
| ZINC08439537 | 4     | 1.07              | -128.2           | 2        | 10          | 2      | 474.558         | 10             | CCOC(=O)C1C@H1(C2C(=NC1=C)C(C@H)1C(=O)OC(C@H)2CCO2)c3ccc3N+([=O])O-]C(=O)OCCNC(=O)c4cccc4O  |
| ZINC08439536 | 2.95  | 0.06              | -44.5            | 2        | 6           | 1      | 462.595         | 7              | CSCC1C@H1(C2C(=NC1=C)C(C@H)1C(=O)OC(C@H)2CCO2)c3ccc3N+([=O])O-]C(=O)OCCNC(=O)c4cccc4O       |
| ZINC08439535 | 5.37  | 0.54              | -14.01           | 1        | 6           | 0      | 483.593         | 7              | CC1ccc1c1C(=O)CSC2=C(C(=O)OC(C@H)1C(=O)OC(C@H)2CCO2)c3ccc3N+([=O])O-]C(=O)OCCNC(=O)c4cccc4O |
| ZINC08439535 | 4.99  | 0.69              | -18.2            | 1        | 6           | 0      | 483.593         | 7              | CC1ccc1c1C(=O)CSC2=C(C(=O)OC(C@H)1C(=O)OC(C@H)2CCO2)c3ccc3N+([=O])O-]C(=O)OCCNC(=O)c4cccc4O |
| ZINC08439535 | 4.99  | 2.46              | -14.86           | 1        | 6           | 0      | 483.593         | 7              | CC1ccc1c1C(=O)CSC2=C(C(=O)OC(C@H)1C(=O)OC(C@H)2CCO2)c3ccc3N+([=O])O-]C(=O)OCCNC(=O)c4cccc4O |
| ZINC08439534 | 3.82  | 2.4               | -129.04          | 2        | 10          | 2      | 474.558         | 10             | CCOC(=O)C1C@H1(C2C(=NC1=C)C(C@H)1C(=O)OC(C@H)2CCO2)c3ccc3N+([=O])O-]C(=O)OCCNC(=O)c4cccc4O  |
| ZINC08439534 | 3.82  | 2.17              | -133.86          | 2        | 10          | 2      | 474.558         | 10             | CCOC(=O)C1C@H1(C2C(=NC1=C)C(C@H)1C(=O)OC(C@H)2CCO2)c3ccc3N+([=O])O-]C(=O)OCCNC(=O)c4cccc4O  |
| ZINC08439534 | 4     | 1.04              | -136.02          | 2        | 10          | 2      | 474.558         | 10             | CCOC(=O)C1C@H1(C2C(=NC1=C)C(C@H)1C(=O)OC(C@H)2CCO2)c3ccc3N+([=O])O-]C(=O)OCCNC(=O)c4cccc4O  |

**Supplementary Table S2:**  
**Detailed table of XP Docking using Schrodinger's Glide module**

| ZINC_ID      | sLogP | ApolarDesolvation | PolarDesolvation | H Donors | H Acceptors | Charge | MolecularWeight | RotatableBonds | SMILES                                                                                                                                                                                                                                                                                                                                                                                                                                                                                                                                                                                                                                                                                                                                                                                                                                                                                                                                                                                                                                                                                                                                                                                                                                                                                                                                                                                                                                                                                                                                                                                                                                                                                                                                                                                                                                                                                                                                                                                                                                                                                                                                                                                                                                                                                                                                                                                                                                                                                                                                                                                                                                                                                                                                                                                                                                                                                                                                                                                                                                                                                                                                                                                                                                                                                                                                                                                                                                                                                                                                                                                                                                                                                                                                                                                                                                                                                                                                                                                                                                                                                                                                                                                                                                                                                                                                                                                                                                                                                                                                                                                                                                                                                                                                                                                                                                                                                                                                                                                                                                                                                                                                                                                                                                                                                                                                                                                                                                                                                                                                                                                                                                                                                                                                                                                                                                                                                                                                                                                                                                                                                                                                                                                                                                                                                                                                                                                                                                                                                                                                                                                                                                                                                                                                                                                                                                                                                                                                                                                                                                                                                                                                                                                                                                                                                                                                                                                                                                                                                                                                                                                                                                                                                                                                                                                                                                                                                                                                                                                                                                                                                                                                                                                                                                                                                                                                                                                                                                                                                                                                                                                                                                                                                                                                                                                                                                                                                                                                                                                                                                                                                               |
|--------------|-------|-------------------|------------------|----------|-------------|--------|-----------------|----------------|------------------------------------------------------------------------------------------------------------------------------------------------------------------------------------------------------------------------------------------------------------------------------------------------------------------------------------------------------------------------------------------------------------------------------------------------------------------------------------------------------------------------------------------------------------------------------------------------------------------------------------------------------------------------------------------------------------------------------------------------------------------------------------------------------------------------------------------------------------------------------------------------------------------------------------------------------------------------------------------------------------------------------------------------------------------------------------------------------------------------------------------------------------------------------------------------------------------------------------------------------------------------------------------------------------------------------------------------------------------------------------------------------------------------------------------------------------------------------------------------------------------------------------------------------------------------------------------------------------------------------------------------------------------------------------------------------------------------------------------------------------------------------------------------------------------------------------------------------------------------------------------------------------------------------------------------------------------------------------------------------------------------------------------------------------------------------------------------------------------------------------------------------------------------------------------------------------------------------------------------------------------------------------------------------------------------------------------------------------------------------------------------------------------------------------------------------------------------------------------------------------------------------------------------------------------------------------------------------------------------------------------------------------------------------------------------------------------------------------------------------------------------------------------------------------------------------------------------------------------------------------------------------------------------------------------------------------------------------------------------------------------------------------------------------------------------------------------------------------------------------------------------------------------------------------------------------------------------------------------------------------------------------------------------------------------------------------------------------------------------------------------------------------------------------------------------------------------------------------------------------------------------------------------------------------------------------------------------------------------------------------------------------------------------------------------------------------------------------------------------------------------------------------------------------------------------------------------------------------------------------------------------------------------------------------------------------------------------------------------------------------------------------------------------------------------------------------------------------------------------------------------------------------------------------------------------------------------------------------------------------------------------------------------------------------------------------------------------------------------------------------------------------------------------------------------------------------------------------------------------------------------------------------------------------------------------------------------------------------------------------------------------------------------------------------------------------------------------------------------------------------------------------------------------------------------------------------------------------------------------------------------------------------------------------------------------------------------------------------------------------------------------------------------------------------------------------------------------------------------------------------------------------------------------------------------------------------------------------------------------------------------------------------------------------------------------------------------------------------------------------------------------------------------------------------------------------------------------------------------------------------------------------------------------------------------------------------------------------------------------------------------------------------------------------------------------------------------------------------------------------------------------------------------------------------------------------------------------------------------------------------------------------------------------------------------------------------------------------------------------------------------------------------------------------------------------------------------------------------------------------------------------------------------------------------------------------------------------------------------------------------------------------------------------------------------------------------------------------------------------------------------------------------------------------------------------------------------------------------------------------------------------------------------------------------------------------------------------------------------------------------------------------------------------------------------------------------------------------------------------------------------------------------------------------------------------------------------------------------------------------------------------------------------------------------------------------------------------------------------------------------------------------------------------------------------------------------------------------------------------------------------------------------------------------------------------------------------------------------------------------------------------------------------------------------------------------------------------------------------------------------------------------------------------------------------------------------------------------------------------------------------------------------------------------------------------------------------------------------------------------------------------------------------------------------------------------------------------------------------------------------------------------------------------------------------------------------------------------------------------------------------------------------------------------------------------------------------------------------------------------------------------------------------------------------------------------------------------------------------------------------------------------------------------------------------------------------------------------------------------------------------------------------------------------------------------------------------------------------------------------------------------------------------------------------------------------------------------------------------------------------------------------------------------------------------------------------------------------------------------------------------------------------------------------------------------------------------------------------------------------------------------------------------------------------------------------------------------------------------------------------------------------------------------------------------------------------------------------------------------------------------------------------------------------------------------------------------------------|
| ZINC08439532 | 3.45  | 2.44              | -118.21          | 2        | 10          | 2      | 460.531         | 9              | CC1=NC=C(C(C@H)1C(=O)OC)c2cccc(e2)N+[(=O)O-]1C(=O)OCCNH+3CCNH+[[CC3]C                                                                                                                                                                                                                                                                                                                                                                                                                                                                                                                                                                                                                                                                                                                                                                                                                                                                                                                                                                                                                                                                                                                                                                                                                                                                                                                                                                                                                                                                                                                                                                                                                                                                                                                                                                                                                                                                                                                                                                                                                                                                                                                                                                                                                                                                                                                                                                                                                                                                                                                                                                                                                                                                                                                                                                                                                                                                                                                                                                                                                                                                                                                                                                                                                                                                                                                                                                                                                                                                                                                                                                                                                                                                                                                                                                                                                                                                                                                                                                                                                                                                                                                                                                                                                                                                                                                                                                                                                                                                                                                                                                                                                                                                                                                                                                                                                                                                                                                                                                                                                                                                                                                                                                                                                                                                                                                                                                                                                                                                                                                                                                                                                                                                                                                                                                                                                                                                                                                                                                                                                                                                                                                                                                                                                                                                                                                                                                                                                                                                                                                                                                                                                                                                                                                                                                                                                                                                                                                                                                                                                                                                                                                                                                                                                                                                                                                                                                                                                                                                                                                                                                                                                                                                                                                                                                                                                                                                                                                                                                                                                                                                                                                                                                                                                                                                                                                                                                                                                                                                                                                                                                                                                                                                                                                                                                                                                                                                                                                                                                                                                                |
| ZINC08439532 | 3.63  | 2.52              | -125.27          | 2        | 10          | 2      | 460.531         | 9              | CC1=NC=C(C(C@H)1C(=O)OCCNH+2CCNH+[[CC2]C]c3cccc(e3)N+[(=O)O-]1C(=O)OC                                                                                                                                                                                                                                                                                                                                                                                                                                                                                                                                                                                                                                                                                                                                                                                                                                                                                                                                                                                                                                                                                                                                                                                                                                                                                                                                                                                                                                                                                                                                                                                                                                                                                                                                                                                                                                                                                                                                                                                                                                                                                                                                                                                                                                                                                                                                                                                                                                                                                                                                                                                                                                                                                                                                                                                                                                                                                                                                                                                                                                                                                                                                                                                                                                                                                                                                                                                                                                                                                                                                                                                                                                                                                                                                                                                                                                                                                                                                                                                                                                                                                                                                                                                                                                                                                                                                                                                                                                                                                                                                                                                                                                                                                                                                                                                                                                                                                                                                                                                                                                                                                                                                                                                                                                                                                                                                                                                                                                                                                                                                                                                                                                                                                                                                                                                                                                                                                                                                                                                                                                                                                                                                                                                                                                                                                                                                                                                                                                                                                                                                                                                                                                                                                                                                                                                                                                                                                                                                                                                                                                                                                                                                                                                                                                                                                                                                                                                                                                                                                                                                                                                                                                                                                                                                                                                                                                                                                                                                                                                                                                                                                                                                                                                                                                                                                                                                                                                                                                                                                                                                                                                                                                                                                                                                                                                                                                                                                                                                                                                                                                |
| ZINC08439532 | 3.63  | 3.71              | -119.25          | 2        | 10          | 2      | 460.531         | 9              | CC1=NC=C(C(C@H)1C(=O)OCCNH+2CCNH+[[CC2]C]e3cccc(e3)N+[(=O)O-]1C(=O)OC                                                                                                                                                                                                                                                                                                                                                                                                                                                                                                                                                                                                                                                                                                                                                                                                                                                                                                                                                                                                                                                                                                                                                                                                                                                                                                                                                                                                                                                                                                                                                                                                                                                                                                                                                                                                                                                                                                                                                                                                                                                                                                                                                                                                                                                                                                                                                                                                                                                                                                                                                                                                                                                                                                                                                                                                                                                                                                                                                                                                                                                                                                                                                                                                                                                                                                                                                                                                                                                                                                                                                                                                                                                                                                                                                                                                                                                                                                                                                                                                                                                                                                                                                                                                                                                                                                                                                                                                                                                                                                                                                                                                                                                                                                                                                                                                                                                                                                                                                                                                                                                                                                                                                                                                                                                                                                                                                                                                                                                                                                                                                                                                                                                                                                                                                                                                                                                                                                                                                                                                                                                                                                                                                                                                                                                                                                                                                                                                                                                                                                                                                                                                                                                                                                                                                                                                                                                                                                                                                                                                                                                                                                                                                                                                                                                                                                                                                                                                                                                                                                                                                                                                                                                                                                                                                                                                                                                                                                                                                                                                                                                                                                                                                                                                                                                                                                                                                                                                                                                                                                                                                                                                                                                                                                                                                                                                                                                                                                                                                                                                                                |
| ZINC08439532 | 3.45  | 2.47              | -127.3           | 2        | 10          | 2      | 460.531         | 9              | CC1=NC=C(C(C@H)1C(=O)OCCNH+2CCNH+[[CC2]C]e3cccc(e3)N+[(=O)O-]1C(=O)OC                                                                                                                                                                                                                                                                                                                                                                                                                                                                                                                                                                                                                                                                                                                                                                                                                                                                                                                                                                                                                                                                                                                                                                                                                                                                                                                                                                                                                                                                                                                                                                                                                                                                                                                                                                                                                                                                                                                                                                                                                                                                                                                                                                                                                                                                                                                                                                                                                                                                                                                                                                                                                                                                                                                                                                                                                                                                                                                                                                                                                                                                                                                                                                                                                                                                                                                                                                                                                                                                                                                                                                                                                                                                                                                                                                                                                                                                                                                                                                                                                                                                                                                                                                                                                                                                                                                                                                                                                                                                                                                                                                                                                                                                                                                                                                                                                                                                                                                                                                                                                                                                                                                                                                                                                                                                                                                                                                                                                                                                                                                                                                                                                                                                                                                                                                                                                                                                                                                                                                                                                                                                                                                                                                                                                                                                                                                                                                                                                                                                                                                                                                                                                                                                                                                                                                                                                                                                                                                                                                                                                                                                                                                                                                                                                                                                                                                                                                                                                                                                                                                                                                                                                                                                                                                                                                                                                                                                                                                                                                                                                                                                                                                                                                                                                                                                                                                                                                                                                                                                                                                                                                                                                                                                                                                                                                                                                                                                                                                                                                                                                                |
| ZINC08439530 | 5.37  | 0.66              | -12.74           | 1        | 6           | 0      | 483.593         | 7              | Cc1ccc(cc1)C(=O)CSC2=NC=C(C(C@H)1C(=O)OC)c3cccc3C(=O)Nc4cccc4C                                                                                                                                                                                                                                                                                                                                                                                                                                                                                                                                                                                                                                                                                                                                                                                                                                                                                                                                                                                                                                                                                                                                                                                                                                                                                                                                                                                                                                                                                                                                                                                                                                                                                                                                                                                                                                                                                                                                                                                                                                                                                                                                                                                                                                                                                                                                                                                                                                                                                                                                                                                                                                                                                                                                                                                                                                                                                                                                                                                                                                                                                                                                                                                                                                                                                                                                                                                                                                                                                                                                                                                                                                                                                                                                                                                                                                                                                                                                                                                                                                                                                                                                                                                                                                                                                                                                                                                                                                                                                                                                                                                                                                                                                                                                                                                                                                                                                                                                                                                                                                                                                                                                                                                                                                                                                                                                                                                                                                                                                                                                                                                                                                                                                                                                                                                                                                                                                                                                                                                                                                                                                                                                                                                                                                                                                                                                                                                                                                                                                                                                                                                                                                                                                                                                                                                                                                                                                                                                                                                                                                                                                                                                                                                                                                                                                                                                                                                                                                                                                                                                                                                                                                                                                                                                                                                                                                                                                                                                                                                                                                                                                                                                                                                                                                                                                                                                                                                                                                                                                                                                                                                                                                                                                                                                                                                                                                                                                                                                                                                                                                       |
| ZINC08439530 | 4.99  | 0.77              | -14.88           | 1        | 6           | 0      | 483.593         | 7              | Cc1ccc(cc1)C(=O)CSC2=C(C(C@H)1C(=O)OC)c3cccc3C(=O)Nc4cccc4C#N                                                                                                                                                                                                                                                                                                                                                                                                                                                                                                                                                                                                                                                                                                                                                                                                                                                                                                                                                                                                                                                                                                                                                                                                                                                                                                                                                                                                                                                                                                                                                                                                                                                                                                                                                                                                                                                                                                                                                                                                                                                                                                                                                                                                                                                                                                                                                                                                                                                                                                                                                                                                                                                                                                                                                                                                                                                                                                                                                                                                                                                                                                                                                                                                                                                                                                                                                                                                                                                                                                                                                                                                                                                                                                                                                                                                                                                                                                                                                                                                                                                                                                                                                                                                                                                                                                                                                                                                                                                                                                                                                                                                                                                                                                                                                                                                                                                                                                                                                                                                                                                                                                                                                                                                                                                                                                                                                                                                                                                                                                                                                                                                                                                                                                                                                                                                                                                                                                                                                                                                                                                                                                                                                                                                                                                                                                                                                                                                                                                                                                                                                                                                                                                                                                                                                                                                                                                                                                                                                                                                                                                                                                                                                                                                                                                                                                                                                                                                                                                                                                                                                                                                                                                                                                                                                                                                                                                                                                                                                                                                                                                                                                                                                                                                                                                                                                                                                                                                                                                                                                                                                                                                                                                                                                                                                                                                                                                                                                                                                                                                                                        |
| ZINC08439530 | 4.99  | 2.61              | -14.76           | 1        | 6           | 0      | 483.593         | 7              | Cc1ccc(cc1)C(=O)CSC2=C(C(C@H)1C(=O)OC)c3cccc3C(=O)Nc4cccc4C#N                                                                                                                                                                                                                                                                                                                                                                                                                                                                                                                                                                                                                                                                                                                                                                                                                                                                                                                                                                                                                                                                                                                                                                                                                                                                                                                                                                                                                                                                                                                                                                                                                                                                                                                                                                                                                                                                                                                                                                                                                                                                                                                                                                                                                                                                                                                                                                                                                                                                                                                                                                                                                                                                                                                                                                                                                                                                                                                                                                                                                                                                                                                                                                                                                                                                                                                                                                                                                                                                                                                                                                                                                                                                                                                                                                                                                                                                                                                                                                                                                                                                                                                                                                                                                                                                                                                                                                                                                                                                                                                                                                                                                                                                                                                                                                                                                                                                                                                                                                                                                                                                                                                                                                                                                                                                                                                                                                                                                                                                                                                                                                                                                                                                                                                                                                                                                                                                                                                                                                                                                                                                                                                                                                                                                                                                                                                                                                                                                                                                                                                                                                                                                                                                                                                                                                                                                                                                                                                                                                                                                                                                                                                                                                                                                                                                                                                                                                                                                                                                                                                                                                                                                                                                                                                                                                                                                                                                                                                                                                                                                                                                                                                                                                                                                                                                                                                                                                                                                                                                                                                                                                                                                                                                                                                                                                                                                                                                                                                                                                                                                                        |
| ZINC08439529 | 3.9   | 0.59              | -44.69           | 2        | 6           | 1      | 484.551         | 5              | CC(C@H)1C(C@H)2C(C@H)3C(=O)N(C2=O)C3cccc3C(C@H)4(NH2+1)c5cccc5N(C4=O)C6cccc6F                                                                                                                                                                                                                                                                                                                                                                                                                                                                                                                                                                                                                                                                                                                                                                                                                                                                                                                                                                                                                                                                                                                                                                                                                                                                                                                                                                                                                                                                                                                                                                                                                                                                                                                                                                                                                                                                                                                                                                                                                                                                                                                                                                                                                                                                                                                                                                                                                                                                                                                                                                                                                                                                                                                                                                                                                                                                                                                                                                                                                                                                                                                                                                                                                                                                                                                                                                                                                                                                                                                                                                                                                                                                                                                                                                                                                                                                                                                                                                                                                                                                                                                                                                                                                                                                                                                                                                                                                                                                                                                                                                                                                                                                                                                                                                                                                                                                                                                                                                                                                                                                                                                                                                                                                                                                                                                                                                                                                                                                                                                                                                                                                                                                                                                                                                                                                                                                                                                                                                                                                                                                                                                                                                                                                                                                                                                                                                                                                                                                                                                                                                                                                                                                                                                                                                                                                                                                                                                                                                                                                                                                                                                                                                                                                                                                                                                                                                                                                                                                                                                                                                                                                                                                                                                                                                                                                                                                                                                                                                                                                                                                                                                                                                                                                                                                                                                                                                                                                                                                                                                                                                                                                                                                                                                                                                                                                                                                                                                                                                                                                        |
| ZINC08439528 | 3.45  | 2.32              | -125.13          | 2        | 10          | 2      | 460.531         | 9              | CC1=NC=C(C(C@H)1C(=O)OC)c2cccc(e2)N+[(=O)O-]1C(=O)OCCNH+3CCNH+[[CC3]C                                                                                                                                                                                                                                                                                                                                                                                                                                                                                                                                                                                                                                                                                                                                                                                                                                                                                                                                                                                                                                                                                                                                                                                                                                                                                                                                                                                                                                                                                                                                                                                                                                                                                                                                                                                                                                                                                                                                                                                                                                                                                                                                                                                                                                                                                                                                                                                                                                                                                                                                                                                                                                                                                                                                                                                                                                                                                                                                                                                                                                                                                                                                                                                                                                                                                                                                                                                                                                                                                                                                                                                                                                                                                                                                                                                                                                                                                                                                                                                                                                                                                                                                                                                                                                                                                                                                                                                                                                                                                                                                                                                                                                                                                                                                                                                                                                                                                                                                                                                                                                                                                                                                                                                                                                                                                                                                                                                                                                                                                                                                                                                                                                                                                                                                                                                                                                                                                                                                                                                                                                                                                                                                                                                                                                                                                                                                                                                                                                                                                                                                                                                                                                                                                                                                                                                                                                                                                                                                                                                                                                                                                                                                                                                                                                                                                                                                                                                                                                                                                                                                                                                                                                                                                                                                                                                                                                                                                                                                                                                                                                                                                                                                                                                                                                                                                                                                                                                                                                                                                                                                                                                                                                                                                                                                                                                                                                                                                                                                                                                                                                |
| ZINC08439528 | 3.63  | 2.32              | -131.17          | 2        | 10          | 2      | 460.531         | 9              | CC1=NC=C(C(C@H)1C(=O)OCCNH+2CCNH+[[CC2]C]c3cccc(e3)N+[(=O)O-]1C(=O)OC                                                                                                                                                                                                                                                                                                                                                                                                                                                                                                                                                                                                                                                                                                                                                                                                                                                                                                                                                                                                                                                                                                                                                                                                                                                                                                                                                                                                                                                                                                                                                                                                                                                                                                                                                                                                                                                                                                                                                                                                                                                                                                                                                                                                                                                                                                                                                                                                                                                                                                                                                                                                                                                                                                                                                                                                                                                                                                                                                                                                                                                                                                                                                                                                                                                                                                                                                                                                                                                                                                                                                                                                                                                                                                                                                                                                                                                                                                                                                                                                                                                                                                                                                                                                                                                                                                                                                                                                                                                                                                                                                                                                                                                                                                                                                                                                                                                                                                                                                                                                                                                                                                                                                                                                                                                                                                                                                                                                                                                                                                                                                                                                                                                                                                                                                                                                                                                                                                                                                                                                                                                                                                                                                                                                                                                                                                                                                                                                                                                                                                                                                                                                                                                                                                                                                                                                                                                                                                                                                                                                                                                                                                                                                                                                                                                                                                                                                                                                                                                                                                                                                                                                                                                                                                                                                                                                                                                                                                                                                                                                                                                                                                                                                                                                                                                                                                                                                                                                                                                                                                                                                                                                                                                                                                                                                                                                                                                                                                                                                                                                                                |
| ZINC08439528 | 3.63  | 3.56              | -128.98          | 2        | 10          | 2      | 460.531         | 9              | CC1=NC=C(C(C@H)1C(=O)OCCNH+2CCNH+[[CC2]C]c3cccc(e3)N+[(=O)O-]1C(=O)OC                                                                                                                                                                                                                                                                                                                                                                                                                                                                                                                                                                                                                                                                                                                                                                                                                                                                                                                                                                                                                                                                                                                                                                                                                                                                                                                                                                                                                                                                                                                                                                                                                                                                                                                                                                                                                                                                                                                                                                                                                                                                                                                                                                                                                                                                                                                                                                                                                                                                                                                                                                                                                                                                                                                                                                                                                                                                                                                                                                                                                                                                                                                                                                                                                                                                                                                                                                                                                                                                                                                                                                                                                                                                                                                                                                                                                                                                                                                                                                                                                                                                                                                                                                                                                                                                                                                                                                                                                                                                                                                                                                                                                                                                                                                                                                                                                                                                                                                                                                                                                                                                                                                                                                                                                                                                                                                                                                                                                                                                                                                                                                                                                                                                                                                                                                                                                                                                                                                                                                                                                                                                                                                                                                                                                                                                                                                                                                                                                                                                                                                                                                                                                                                                                                                                                                                                                                                                                                                                                                                                                                                                                                                                                                                                                                                                                                                                                                                                                                                                                                                                                                                                                                                                                                                                                                                                                                                                                                                                                                                                                                                                                                                                                                                                                                                                                                                                                                                                                                                                                                                                                                                                                                                                                                                                                                                                                                                                                                                                                                                                                                |
| ZINC08439528 | 3.45  | 2.23              | -132.62          | 2        | 10          | 2      | 460.531         | 9              | CC1=NC=C(C(C@H)1C(=O)OCCNH+2CCNH+[[CC2]C]c3cccc(e3)N+[(=O)O-]1C(=O)OC                                                                                                                                                                                                                                                                                                                                                                                                                                                                                                                                                                                                                                                                                                                                                                                                                                                                                                                                                                                                                                                                                                                                                                                                                                                                                                                                                                                                                                                                                                                                                                                                                                                                                                                                                                                                                                                                                                                                                                                                                                                                                                                                                                                                                                                                                                                                                                                                                                                                                                                                                                                                                                                                                                                                                                                                                                                                                                                                                                                                                                                                                                                                                                                                                                                                                                                                                                                                                                                                                                                                                                                                                                                                                                                                                                                                                                                                                                                                                                                                                                                                                                                                                                                                                                                                                                                                                                                                                                                                                                                                                                                                                                                                                                                                                                                                                                                                                                                                                                                                                                                                                                                                                                                                                                                                                                                                                                                                                                                                                                                                                                                                                                                                                                                                                                                                                                                                                                                                                                                                                                                                                                                                                                                                                                                                                                                                                                                                                                                                                                                                                                                                                                                                                                                                                                                                                                                                                                                                                                                                                                                                                                                                                                                                                                                                                                                                                                                                                                                                                                                                                                                                                                                                                                                                                                                                                                                                                                                                                                                                                                                                                                                                                                                                                                                                                                                                                                                                                                                                                                                                                                                                                                                                                                                                                                                                                                                                                                                                                                                                                                |
| ZINC08439527 | 3.9   | 0.53              | -41.19           | 2        | 6           | 1      | 484.551         | 5              | CC(C@H)1C(C@H)2C(C@H)3C(=O)N(C2=O)C3cccc3C(C@H)4(NH2+1)c5cccc5N(C4=O)C6cccc6F                                                                                                                                                                                                                                                                                                                                                                                                                                                                                                                                                                                                                                                                                                                                                                                                                                                                                                                                                                                                                                                                                                                                                                                                                                                                                                                                                                                                                                                                                                                                                                                                                                                                                                                                                                                                                                                                                                                                                                                                                                                                                                                                                                                                                                                                                                                                                                                                                                                                                                                                                                                                                                                                                                                                                                                                                                                                                                                                                                                                                                                                                                                                                                                                                                                                                                                                                                                                                                                                                                                                                                                                                                                                                                                                                                                                                                                                                                                                                                                                                                                                                                                                                                                                                                                                                                                                                                                                                                                                                                                                                                                                                                                                                                                                                                                                                                                                                                                                                                                                                                                                                                                                                                                                                                                                                                                                                                                                                                                                                                                                                                                                                                                                                                                                                                                                                                                                                                                                                                                                                                                                                                                                                                                                                                                                                                                                                                                                                                                                                                                                                                                                                                                                                                                                                                                                                                                                                                                                                                                                                                                                                                                                                                                                                                                                                                                                                                                                                                                                                                                                                                                                                                                                                                                                                                                                                                                                                                                                                                                                                                                                                                                                                                                                                                                                                                                                                                                                                                                                                                                                                                                                                                                                                                                                                                                                                                                                                                                                                                                                                        |
| ZINC08439526 | 4.79  | -2.2              | -55.3            | 1        | 13          | 1      | 629.712         | 13             | CCOC(=O)C1(C@H)2C(C(=N=C1)C(=O)OCCNH+2CCN(C2)S(=O)(=O)c3ccc(cc3)OC)c4cccc(e4)N+[(=O)O-]                                                                                                                                                                                                                                                                                                                                                                                                                                                                                                                                                                                                                                                                                                                                                                                                                                                                                                                                                                                                                                                                                                                                                                                                                                                                                                                                                                                                                                                                                                                                                                                                                                                                                                                                                                                                                                                                                                                                                                                                                                                                                                                                                                                                                                                                                                                                                                                                                                                                                                                                                                                                                                                                                                                                                                                                                                                                                                                                                                                                                                                                                                                                                                                                                                                                                                                                                                                                                                                                                                                                                                                                                                                                                                                                                                                                                                                                                                                                                                                                                                                                                                                                                                                                                                                                                                                                                                                                                                                                                                                                                                                                                                                                                                                                                                                                                                                                                                                                                                                                                                                                                                                                                                                                                                                                                                                                                                                                                                                                                                                                                                                                                                                                                                                                                                                                                                                                                                                                                                                                                                                                                                                                                                                                                                                                                                                                                                                                                                                                                                                                                                                                                                                                                                                                                                                                                                                                                                                                                                                                                                                                                                                                                                                                                                                                                                                                                                                                                                                                                                                                                                                                                                                                                                                                                                                                                                                                                                                                                                                                                                                                                                                                                                                                                                                                                                                                                                                                                                                                                                                                                                                                                                                                                                                                                                                                                                                                                                                                                                                                              |
| ZINC08439526 | 4.79  | -2.44             | -60.71           | 1        | 13          | 1      | 629.712         | 13             | CCOC(=O)C1(C@H)2C(C(=N=C1)C(=O)OCCNH+2CCN(C2)S(=O)(=O)c3ccc(cc3)OC)c4cccc(e4)OC                                                                                                                                                                                                                                                                                                                                                                                                                                                                                                                                                                                                                                                                                                                                                                                                                                                                                                                                                                                                                                                                                                                                                                                                                                                                                                                                                                                                                                                                                                                                                                                                                                                                                                                                                                                                                                                                                                                                                                                                                                                                                                                                                                                                                                                                                                                                                                                                                                                                                                                                                                                                                                                                                                                                                                                                                                                                                                                                                                                                                                                                                                                                                                                                                                                                                                                                                                                                                                                                                                                                                                                                                                                                                                                                                                                                                                                                                                                                                                                                                                                                                                                                                                                                                                                                                                                                                                                                                                                                                                                                                                                                                                                                                                                                                                                                                                                                                                                                                                                                                                                                                                                                                                                                                                                                                                                                                                                                                                                                                                                                                                                                                                                                                                                                                                                                                                                                                                                                                                                                                                                                                                                                                                                                                                                                                                                                                                                                                                                                                                                                                                                                                                                                                                                                                                                                                                                                                                                                                                                                                                                                                                                                                                                                                                                                                                                                                                                                                                                                                                                                                                                                                                                                                                                                                                                                                                                                                                                                                                                                                                                                                                                                                                                                                                                                                                                                                                                                                                                                                                                                                                                                                                                                                                                                                                                                                                                                                                                                                                                                                      |
| ZINC08439526 | 4.97  | -3.51             | -61.65           | 1        | 13          | 1      | 629.712         | 13             | CCOC(=O)C1(C@H)2C(C(=N=C1)C(=O)OCCNH+2CCN(C2)S(=O)(=O)c3ccc(cc3)OC)c4cccc(e4)N+[(=O)O-]                                                                                                                                                                                                                                                                                                                                                                                                                                                                                                                                                                                                                                                                                                                                                                                                                                                                                                                                                                                                                                                                                                                                                                                                                                                                                                                                                                                                                                                                                                                                                                                                                                                                                                                                                                                                                                                                                                                                                                                                                                                                                                                                                                                                                                                                                                                                                                                                                                                                                                                                                                                                                                                                                                                                                                                                                                                                                                                                                                                                                                                                                                                                                                                                                                                                                                                                                                                                                                                                                                                                                                                                                                                                                                                                                                                                                                                                                                                                                                                                                                                                                                                                                                                                                                                                                                                                                                                                                                                                                                                                                                                                                                                                                                                                                                                                                                                                                                                                                                                                                                                                                                                                                                                                                                                                                                                                                                                                                                                                                                                                                                                                                                                                                                                                                                                                                                                                                                                                                                                                                                                                                                                                                                                                                                                                                                                                                                                                                                                                                                                                                                                                                                                                                                                                                                                                                                                                                                                                                                                                                                                                                                                                                                                                                                                                                                                                                                                                                                                                                                                                                                                                                                                                                                                                                                                                                                                                                                                                                                                                                                                                                                                                                                                                                                                                                                                                                                                                                                                                                                                                                                                                                                                                                                                                                                                                                                                                                                                                                                                                              |
| ZINC08439523 | 4.79  | -2.24             | -58.4            | 1        | 13          | 1      | 629.712         | 13             | CCOC(=O)C1(C@H)2C(C(=N=C1)C(=O)OCCNH+2CCN(C2)S(=O)(=O)c3ccc(cc3)OC)c4cccc(e4)N+[(=O)O-]                                                                                                                                                                                                                                                                                                                                                                                                                                                                                                                                                                                                                                                                                                                                                                                                                                                                                                                                                                                                                                                                                                                                                                                                                                                                                                                                                                                                                                                                                                                                                                                                                                                                                                                                                                                                                                                                                                                                                                                                                                                                                                                                                                                                                                                                                                                                                                                                                                                                                                                                                                                                                                                                                                                                                                                                                                                                                                                                                                                                                                                                                                                                                                                                                                                                                                                                                                                                                                                                                                                                                                                                                                                                                                                                                                                                                                                                                                                                                                                                                                                                                                                                                                                                                                                                                                                                                                                                                                                                                                                                                                                                                                                                                                                                                                                                                                                                                                                                                                                                                                                                                                                                                                                                                                                                                                                                                                                                                                                                                                                                                                                                                                                                                                                                                                                                                                                                                                                                                                                                                                                                                                                                                                                                                                                                                                                                                                                                                                                                                                                                                                                                                                                                                                                                                                                                                                                                                                                                                                                                                                                                                                                                                                                                                                                                                                                                                                                                                                                                                                                                                                                                                                                                                                                                                                                                                                                                                                                                                                                                                                                                                                                                                                                                                                                                                                                                                                                                                                                                                                                                                                                                                                                                                                                                                                                                                                                                                                                                                                                                              |
| ZINC08439523 | 4.79  | -2.48             | -63.68           | 1        | 13          | 1      | 629.712         | 13             | CCOC(=O)C1(C@H)2C(C(=N=C1)C(=O)OCCNH+2CCN(C2)S(=O)(=O)c3ccc(cc3)OC)c4cccc(e4)OC                                                                                                                                                                                                                                                                                                                                                                                                                                                                                                                                                                                                                                                                                                                                                                                                                                                                                                                                                                                                                                                                                                                                                                                                                                                                                                                                                                                                                                                                                                                                                                                                                                                                                                                                                                                                                                                                                                                                                                                                                                                                                                                                                                                                                                                                                                                                                                                                                                                                                                                                                                                                                                                                                                                                                                                                                                                                                                                                                                                                                                                                                                                                                                                                                                                                                                                                                                                                                                                                                                                                                                                                                                                                                                                                                                                                                                                                                                                                                                                                                                                                                                                                                                                                                                                                                                                                                                                                                                                                                                                                                                                                                                                                                                                                                                                                                                                                                                                                                                                                                                                                                                                                                                                                                                                                                                                                                                                                                                                                                                                                                                                                                                                                                                                                                                                                                                                                                                                                                                                                                                                                                                                                                                                                                                                                                                                                                                                                                                                                                                                                                                                                                                                                                                                                                                                                                                                                                                                                                                                                                                                                                                                                                                                                                                                                                                                                                                                                                                                                                                                                                                                                                                                                                                                                                                                                                                                                                                                                                                                                                                                                                                                                                                                                                                                                                                                                                                                                                                                                                                                                                                                                                                                                                                                                                                                                                                                                                                                                                                                                                      |
| ZINC08439523 | 4.97  | -3.6              | -64.16           | 1        | 13          | 1      | 629.712         | 13             | CCOC(=O)C1(C@H)2C(C(=N=C1)C(=O)OCCNH+2CCN(C2)S(=O)(=O)c3ccc(cc3)OC)c4cccc(e4)N+[(=O)O-]                                                                                                                                                                                                                                                                                                                                                                                                                                                                                                                                                                                                                                                                                                                                                                                                                                                                                                                                                                                                                                                                                                                                                                                                                                                                                                                                                                                                                                                                                                                                                                                                                                                                                                                                                                                                                                                                                                                                                                                                                                                                                                                                                                                                                                                                                                                                                                                                                                                                                                                                                                                                                                                                                                                                                                                                                                                                                                                                                                                                                                                                                                                                                                                                                                                                                                                                                                                                                                                                                                                                                                                                                                                                                                                                                                                                                                                                                                                                                                                                                                                                                                                                                                                                                                                                                                                                                                                                                                                                                                                                                                                                                                                                                                                                                                                                                                                                                                                                                                                                                                                                                                                                                                                                                                                                                                                                                                                                                                                                                                                                                                                                                                                                                                                                                                                                                                                                                                                                                                                                                                                                                                                                                                                                                                                                                                                                                                                                                                                                                                                                                                                                                                                                                                                                                                                                                                                                                                                                                                                                                                                                                                                                                                                                                                                                                                                                                                                                                                                                                                                                                                                                                                                                                                                                                                                                                                                                                                                                                                                                                                                                                                                                                                                                                                                                                                                                                                                                                                                                                                                                                                                                                                                                                                                                                                                                                                                                                                                                                                                                              |
| ZINC08439522 | 4.92  | 12.31             | -27.82           | 3        | 7           | 0      | 519.026         | 7              | Cc1cccc1NC(=O)C2=C(NC(=O)C(C@H)2c3cccc3)C#NSCC(=O)Nc4cccc(e4)C                                                                                                                                                                                                                                                                                                                                                                                                                                                                                                                                                                                                                                                                                                                                                                                                                                                                                                                                                                                                                                                                                                                                                                                                                                                                                                                                                                                                                                                                                                                                                                                                                                                                                                                                                                                                                                                                                                                                                                                                                                                                                                                                                                                                                                                                                                                                                                                                                                                                                                                                                                                                                                                                                                                                                                                                                                                                                                                                                                                                                                                                                                                                                                                                                                                                                                                                                                                                                                                                                                                                                                                                                                                                                                                                                                                                                                                                                                                                                                                                                                                                                                                                                                                                                                                                                                                                                                                                                                                                                                                                                                                                                                                                                                                                                                                                                                                                                                                                                                                                                                                                                                                                                                                                                                                                                                                                                                                                                                                                                                                                                                                                                                                                                                                                                                                                                                                                                                                                                                                                                                                                                                                                                                                                                                                                                                                                                                                                                                                                                                                                                                                                                                                                                                                                                                                                                                                                                                                                                                                                                                                                                                                                                                                                                                                                                                                                                                                                                                                                                                                                                                                                                                                                                                                                                                                                                                                                                                                                                                                                                                                                                                                                                                                                                                                                                                                                                                                                                                                                                                                                                                                                                                                                                                                                                                                                                                                                                                                                                                                                                                       |
| ZINC08439522 | 5.26  | -0.95             | -15.34           | 2        | 7           | 0      | 519.026         | 7              | Cc1cccc1NC(=O)C2=C(NC(=O)C(C@H)2c3cccc3)C#NSCC(=O)Nc4cccc(e4)C                                                                                                                                                                                                                                                                                                                                                                                                                                                                                                                                                                                                                                                                                                                                                                                                                                                                                                                                                                                                                                                                                                                                                                                                                                                                                                                                                                                                                                                                                                                                                                                                                                                                                                                                                                                                                                                                                                                                                                                                                                                                                                                                                                                                                                                                                                                                                                                                                                                                                                                                                                                                                                                                                                                                                                                                                                                                                                                                                                                                                                                                                                                                                                                                                                                                                                                                                                                                                                                                                                                                                                                                                                                                                                                                                                                                                                                                                                                                                                                                                                                                                                                                                                                                                                                                                                                                                                                                                                                                                                                                                                                                                                                                                                                                                                                                                                                                                                                                                                                                                                                                                                                                                                                                                                                                                                                                                                                                                                                                                                                                                                                                                                                                                                                                                                                                                                                                                                                                                                                                                                                                                                                                                                                                                                                                                                                                                                                                                                                                                                                                                                                                                                                                                                                                                                                                                                                                                                                                                                                                                                                                                                                                                                                                                                                                                                                                                                                                                                                                                                                                                                                                                                                                                                                                                                                                                                                                                                                                                                                                                                                                                                                                                                                                                                                                                                                                                                                                                                                                                                                                                                                                                                                                                                                                                                                                                                                                                                                                                                                                                                       |
| ZINC08439522 | 5.44  | -1.89             | -15.71           | 2        | 7           | 0      | 519.026         | 7              | Cc1cccc1NC(=O)C2=C(NC(=O)C(C@H)2c3cccc3)C#NSCC(=O)Nc4cccc(e4)C                                                                                                                                                                                                                                                                                                                                                                                                                                                                                                                                                                                                                                                                                                                                                                                                                                                                                                                                                                                                                                                                                                                                                                                                                                                                                                                                                                                                                                                                                                                                                                                                                                                                                                                                                                                                                                                                                                                                                                                                                                                                                                                                                                                                                                                                                                                                                                                                                                                                                                                                                                                                                                                                                                                                                                                                                                                                                                                                                                                                                                                                                                                                                                                                                                                                                                                                                                                                                                                                                                                                                                                                                                                                                                                                                                                                                                                                                                                                                                                                                                                                                                                                                                                                                                                                                                                                                                                                                                                                                                                                                                                                                                                                                                                                                                                                                                                                                                                                                                                                                                                                                                                                                                                                                                                                                                                                                                                                                                                                                                                                                                                                                                                                                                                                                                                                                                                                                                                                                                                                                                                                                                                                                                                                                                                                                                                                                                                                                                                                                                                                                                                                                                                                                                                                                                                                                                                                                                                                                                                                                                                                                                                                                                                                                                                                                                                                                                                                                                                                                                                                                                                                                                                                                                                                                                                                                                                                                                                                                                                                                                                                                                                                                                                                                                                                                                                                                                                                                                                                                                                                                                                                                                                                                                                                                                                                                                                                                                                                                                                                                                       |
| ZINC08439521 | 7.48  | 1.74              | -14.58           | 0        | 5           | 0      | 464.631         | 8              | CCc1c(nc1s)Nc2cccc2C(C@H)3C(=O)Nc4cccc4C                                                                                                                                                                                                                                                                                                                                                                                                                                                                                                                                                                                                                                                                                                                                                                                                                                                                                                                                                                                                                                                                                                                                                                                                                                                                                                                                                                                                                                                                                                                                                                                                                                                                                                                                                                                                                                                                                                                                                                                                                                                                                                                                                                                                                                                                                                                                                                                                                                                                                                                                                                                                                                                                                                                                                                                                                                                                                                                                                                                                                                                                                                                                                                                                                                                                                                                                                                                                                                                                                                                                                                                                                                                                                                                                                                                                                                                                                                                                                                                                                                                                                                                                                                                                                                                                                                                                                                                                                                                                                                                                                                                                                                                                                                                                                                                                                                                                                                                                                                                                                                                                                                                                                                                                                                                                                                                                                                                                                                                                                                                                                                                                                                                                                                                                                                                                                                                                                                                                                                                                                                                                                                                                                                                                                                                                                                                                                                                                                                                                                                                                                                                                                                                                                                                                                                                                                                                                                                                                                                                                                                                                                                                                                                                                                                                                                                                                                                                                                                                                                                                                                                                                                                                                                                                                                                                                                                                                                                                                                                                                                                                                                                                                                                                                                                                                                                                                                                                                                                                                                                                                                                                                                                                                                                                                                                                                                                                                                                                                                                                                                                                             |
| ZINC08439520 | 5.16  | 0.59              | -34.12           | 2        | 15          | 0      | 700.701         | 17             | CC1=NC=C(C(C@H)1C(=O)OCCNH+2CCNH+[[CC2]C]c3cccc(e3)N+[(=O)O-]1C(=O)OCCO4cccc(e4)NC(=O)C                                                                                                                                                                                                                                                                                                                                                                                                                                                                                                                                                                                                                                                                                                                                                                                                                                                                                                                                                                                                                                                                                                                                                                                                                                                                                                                                                                                                                                                                                                                                                                                                                                                                                                                                                                                                                                                                                                                                                                                                                                                                                                                                                                                                                                                                                                                                                                                                                                                                                                                                                                                                                                                                                                                                                                                                                                                                                                                                                                                                                                                                                                                                                                                                                                                                                                                                                                                                                                                                                                                                                                                                                                                                                                                                                                                                                                                                                                                                                                                                                                                                                                                                                                                                                                                                                                                                                                                                                                                                                                                                                                                                                                                                                                                                                                                                                                                                                                                                                                                                                                                                                                                                                                                                                                                                                                                                                                                                                                                                                                                                                                                                                                                                                                                                                                                                                                                                                                                                                                                                                                                                                                                                                                                                                                                                                                                                                                                                                                                                                                                                                                                                                                                                                                                                                                                                                                                                                                                                                                                                                                                                                                                                                                                                                                                                                                                                                                                                                                                                                                                                                                                                                                                                                                                                                                                                                                                                                                                                                                                                                                                                                                                                                                                                                                                                                                                                                                                                                                                                                                                                                                                                                                                                                                                                                                                                                                                                                                                                                                                                              |
| ZINC08439520 | 5.34  | 0.59              | -32.42           | 2        | 15          | 0      | 700.701         | 17             | CC1=NC=C(C(C@H)1C(=O)OCCNH+2CCNH+[[CC2]C]c3cccc(e3)N+[(=O)O-]1C(=O)OCCO4cccc(e4)NC(=O)C                                                                                                                                                                                                                                                                                                                                                                                                                                                                                                                                                                                                                                                                                                                                                                                                                                                                                                                                                                                                                                                                                                                                                                                                                                                                                                                                                                                                                                                                                                                                                                                                                                                                                                                                                                                                                                                                                                                                                                                                                                                                                                                                                                                                                                                                                                                                                                                                                                                                                                                                                                                                                                                                                                                                                                                                                                                                                                                                                                                                                                                                                                                                                                                                                                                                                                                                                                                                                                                                                                                                                                                                                                                                                                                                                                                                                                                                                                                                                                                                                                                                                                                                                                                                                                                                                                                                                                                                                                                                                                                                                                                                                                                                                                                                                                                                                                                                                                                                                                                                                                                                                                                                                                                                                                                                                                                                                                                                                                                                                                                                                                                                                                                                                                                                                                                                                                                                                                                                                                                                                                                                                                                                                                                                                                                                                                                                                                                                                                                                                                                                                                                                                                                                                                                                                                                                                                                                                                                                                                                                                                                                                                                                                                                                                                                                                                                                                                                                                                                                                                                                                                                                                                                                                                                                                                                                                                                                                                                                                                                                                                                                                                                                                                                                                                                                                                                                                                                                                                                                                                                                                                                                                                                                                                                                                                                                                                                                                                                                                                                                              |
| ZINC08439520 | 5.34  | 1.94              | -37.62           | 2        | 15          | 0      | 700.701         | 17             | CC1=NC=C(C(C@H)1C(=O)OCCNH+2CCNH+[[CC2]C]c3cccc(e3)N+[(=O)O-]1C(=O)OCCO4cccc(e4)NC(=O)C                                                                                                                                                                                                                                                                                                                                                                                                                                                                                                                                                                                                                                                                                                                                                                                                                                                                                                                                                                                                                                                                                                                                                                                                                                                                                                                                                                                                                                                                                                                                                                                                                                                                                                                                                                                                                                                                                                                                                                                                                                                                                                                                                                                                                                                                                                                                                                                                                                                                                                                                                                                                                                                                                                                                                                                                                                                                                                                                                                                                                                                                                                                                                                                                                                                                                                                                                                                                                                                                                                                                                                                                                                                                                                                                                                                                                                                                                                                                                                                                                                                                                                                                                                                                                                                                                                                                                                                                                                                                                                                                                                                                                                                                                                                                                                                                                                                                                                                                                                                                                                                                                                                                                                                                                                                                                                                                                                                                                                                                                                                                                                                                                                                                                                                                                                                                                                                                                                                                                                                                                                                                                                                                                                                                                                                                                                                                                                                                                                                                                                                                                                                                                                                                                                                                                                                                                                                                                                                                                                                                                                                                                                                                                                                                                                                                                                                                                                                                                                                                                                                                                                                                                                                                                                                                                                                                                                                                                                                                                                                                                                                                                                                                                                                                                                                                                                                                                                                                                                                                                                                                                                                                                                                                                                                                                                                                                                                                                                                                                                                                              |
| ZINC08439520 | 5.16  | 0.5               | -33.64           | 2        | 15          | 0      | 700.701         | 17             | CC1=NC=C(C(C@H)1C(=O)OCCNH+2CCNH+[[CC2]C]c3cccc(e3)N+[(=O)O-]1C(=O)OCCO4cccc(e4)NC(=O)C                                                                                                                                                                                                                                                                                                                                                                                                                                                                                                                                                                                                                                                                                                                                                                                                                                                                                                                                                                                                                                                                                                                                                                                                                                                                                                                                                                                                                                                                                                                                                                                                                                                                                                                                                                                                                                                                                                                                                                                                                                                                                                                                                                                                                                                                                                                                                                                                                                                                                                                                                                                                                                                                                                                                                                                                                                                                                                                                                                                                                                                                                                                                                                                                                                                                                                                                                                                                                                                                                                                                                                                                                                                                                                                                                                                                                                                                                                                                                                                                                                                                                                                                                                                                                                                                                                                                                                                                                                                                                                                                                                                                                                                                                                                                                                                                                                                                                                                                                                                                                                                                                                                                                                                                                                                                                                                                                                                                                                                                                                                                                                                                                                                                                                                                                                                                                                                                                                                                                                                                                                                                                                                                                                                                                                                                                                                                                                                                                                                                                                                                                                                                                                                                                                                                                                                                                                                                                                                                                                                                                                                                                                                                                                                                                                                                                                                                                                                                                                                                                                                                                                                                                                                                                                                                                                                                                                                                                                                                                                                                                                                                                                                                                                                                                                                                                                                                                                                                                                                                                                                                                                                                                                                                                                                                                                                                                                                                                                                                                                                                              |
| ZINC08439518 | 3.92  | -1.26             | -42.35           | 3        | 8           | 1      | 569.707         | 8              | Cc1ccc(cc1)NC(=O)C2=C(NC(=O)C(C@H)2c3cccc3)C#NSCC(=O)Nc4cccc(e4)C                                                                                                                                                                                                                                                                                                                                                                                                                                                                                                                                                                                                                                                                                                                                                                                                                                                                                                                                                                                                                                                                                                                                                                                                                                                                                                                                                                                                                                                                                                                                                                                                                                                                                                                                                                                                                                                                                                                                                                                                                                                                                                                                                                                                                                                                                                                                                                                                                                                                                                                                                                                                                                                                                                                                                                                                                                                                                                                                                                                                                                                                                                                                                                                                                                                                                                                                                                                                                                                                                                                                                                                                                                                                                                                                                                                                                                                                                                                                                                                                                                                                                                                                                                                                                                                                                                                                                                                                                                                                                                                                                                                                                                                                                                                                                                                                                                                                                                                                                                                                                                                                                                                                                                                                                                                                                                                                                                                                                                                                                                                                                                                                                                                                                                                                                                                                                                                                                                                                                                                                                                                                                                                                                                                                                                                                                                                                                                                                                                                                                                                                                                                                                                                                                                                                                                                                                                                                                                                                                                                                                                                                                                                                                                                                                                                                                                                                                                                                                                                                                                                                                                                                                                                                                                                                                                                                                                                                                                                                                                                                                                                                                                                                                                                                                                                                                                                                                                                                                                                                                                                                                                                                                                                                                                                                                                                                                                                                                                                                                                                                                                    |
| ZINC08439517 | 4.8   | -1.77             | -66.11           | 1        | 12          | 1      | 599.686         | 11             | Cc1ccc(cc1)S(=O)(=O)N2CCNH+[[CC2]C]COC(=O)C3(C@H)4C(C@H)5C(C@H)6C(C@H)7C(C@H)8C(C@H)9C(C@H)10C(C@H)11C(C@H)12C(C@H)13C(C@H)14C(C@H)15C(C@H)16C(C@H)17C(C@H)18C(C@H)19C(C@H)20C(C@H)21C(C@H)22C(C@H)23C(C@H)24C(C@H)25C(C@H)26C(C@H)27C(C@H)28C(C@H)29C(C@H)30C(C@H)31C(C@H)32C(C@H)33C(C@H)34C(C@H)35C(C@H)36C(C@H)37C(C@H)38C(C@H)39C(C@H)40C(C@H)41C(C@H)42C(C@H)43C(C@H)44C(C@H)45C(C@H)46C(C@H)47C(C@H)48C(C@H)49C(C@H)50C(C@H)51C(C@H)52C(C@H)53C(C@H)54C(C@H)55C(C@H)56C(C@H)57C(C@H)58C(C@H)59C(C@H)60C(C@H)61C(C@H)62C(C@H)63C(C@H)64C(C@H)65C(C@H)66C(C@H)67C(C@H)68C(C@H)69C(C@H)70C(C@H)71C(C@H)72C(C@H)73C(C@H)74C(C@H)75C(C@H)76C(C@H)77C(C@H)78C(C@H)79C(C@H)80C(C@H)81C(C@H)82C(C@H)83C(C@H)84C(C@H)85C(C@H)86C(C@H)87C(C@H)88C(C@H)89C(C@H)90C(C@H)91C(C@H)92C(C@H)93C(C@H)94C(C@H)95C(C@H)96C(C@H)97C(C@H)98C(C@H)99C(C@H)100C(C@H)101C(C@H)102C(C@H)103C(C@H)104C(C@H)105C(C@H)106C(C@H)107C(C@H)108C(C@H)109C(C@H)110C(C@H)111C(C@H)112C(C@H)113C(C@H)114C(C@H)115C(C@H)116C(C@H)117C(C@H)118C(C@H)119C(C@H)120C(C@H)121C(C@H)122C(C@H)123C(C@H)124C(C@H)125C(C@H)126C(C@H)127C(C@H)128C(C@H)129C(C@H)130C(C@H)131C(C@H)132C(C@H)133C(C@H)134C(C@H)135C(C@H)136C(C@H)137C(C@H)138C(C@H)139C(C@H)140C(C@H)141C(C@H)142C(C@H)143C(C@H)144C(C@H)145C(C@H)146C(C@H)147C(C@H)148C(C@H)149C(C@H)150C(C@H)151C(C@H)152C(C@H)153C(C@H)154C(C@H)155C(C@H)156C(C@H)157C(C@H)158C(C@H)159C(C@H)160C(C@H)161C(C@H)162C(C@H)163C(C@H)164C(C@H)165C(C@H)166C(C@H)167C(C@H)168C(C@H)169C(C@H)170C(C@H)171C(C@H)172C(C@H)173C(C@H)174C(C@H)175C(C@H)176C(C@H)177C(C@H)178C(C@H)179C(C@H)180C(C@H)181C(C@H)182C(C@H)183C(C@H)184C(C@H)185C(C@H)186C(C@H)187C(C@H)188C(C@H)189C(C@H)190C(C@H)191C(C@H)192C(C@H)193C(C@H)194C(C@H)195C(C@H)196C(C@H)197C(C@H)198C(C@H)199C(C@H)200C(C@H)201C(C@H)202C(C@H)203C(C@H)204C(C@H)205C(C@H)206C(C@H)207C(C@H)208C(C@H)209C(C@H)210C(C@H)211C(C@H)212C(C@H)213C(C@H)214C(C@H)215C(C@H)216C(C@H)217C(C@H)218C(C@H)219C(C@H)220C(C@H)221C(C@H)222C(C@H)223C(C@H)224C(C@H)225C(C@H)226C(C@H)227C(C@H)228C(C@H)229C(C@H)230C(C@H)231C(C@H)232C(C@H)233C(C@H)234C(C@H)235C(C@H)236C(C@H)237C(C@H)238C(C@H)239C(C@H)240C(C@H)241C(C@H)242C(C@H)243C(C@H)244C(C@H)245C(C@H)246C(C@H)247C(C@H)248C(C@H)249C(C@H)250C(C@H)251C(C@H)252C(C@H)253C(C@H)254C(C@H)255C(C@H)256C(C@H)257C(C@H)258C(C@H)259C(C@H)260C(C@H)261C(C@H)262C(C@H)263C(C@H)264C(C@H)265C(C@H)266C(C@H)267C(C@H)268C(C@H)269C(C@H)270C(C@H)271C(C@H)272C(C@H)273C(C@H)274C(C@H)275C(C@H)276C(C@H)277C(C@H)278C(C@H)279C(C@H)280C(C@H)281C(C@H)282C(C@H)283C(C@H)284C(C@H)285C(C@H)286C(C@H)287C(C@H)288C(C@H)289C(C@H)290C(C@H)291C(C@H)292C(C@H)293C(C@H)294C(C@H)295C(C@H)296C(C@H)297C(C@H)298C(C@H)299C(C@H)300C(C@H)301C(C@H)302C(C@H)303C(C@H)304C(C@H)305C(C@H)306C(C@H)307C(C@H)308C(C@H)309C(C@H)310C(C@H)311C(C@H)312C(C@H)313C(C@H)314C(C@H)315C(C@H)316C(C@H)317C(C@H)318C(C@H)319C(C@H)320C(C@H)321C(C@H)322C(C@H)323C(C@H)324C(C@H)325C(C@H)326C(C@H)327C(C@H)328C(C@H)329C(C@H)330C(C@H)331C(C@H)332C(C@H)333C(C@H)334C(C@H)335C(C@H)336C(C@H)337C(C@H)338C(C@H)339C(C@H)340C(C@H)341C(C@H)342C(C@H)343C(C@H)344C(C@H)345C(C@H)346C(C@H)347C(C@H)348C(C@H)349C(C@H)350C(C@H)351C(C@H)352C(C@H)353C(C@H)354C(C@H)355C(C@H)356C(C@H)357C(C@H)358C(C@H)359C(C@H)360C(C@H)361C(C@H)362C(C@H)363C(C@H)364C(C@H)365C(C@H)366C(C@H)367C(C@H)368C(C@H)369C(C@H)370C(C@H)371C(C@H)372C(C@H)373C(C@H)374C(C@H)375C(C@H)376C(C@H)377C(C@H)378C(C@H)379C(C@H)380C(C@H)381C(C@H)382C(C@H)383C(C@H)384C(C@H)385C(C@H)386C(C@H)387C(C@H)388C(C@H)389C(C@H)390C(C@H)391C(C@H)392C(C@H)393C(C@H)394C(C@H)395C(C@H)396C(C@H)397C(C@H)398C(C@H)399C(C@H)400C(C@H)401C(C@H)402C(C@H)403C(C@H)404C(C@H)405C(C@H)406C(C@H)407C(C@H)408C(C@H)409C(C@H)410C(C@H)411C(C@H)412C(C@H)413C(C@H)414C(C@H)415C(C@H)416C(C@H)417C(C@H)418C(C@H)419C(C@H)420C(C@H)421C(C@H)422C(C@H)423C(C@H)424C(C@H)425C(C@H)426C(C@H)427C(C@H)428C(C@H)429C(C@H)430C(C@H)431C(C@H)432C(C@H)433C(C@H)434C(C@H)435C(C@H)436C(C@H)437C(C@H)438C(C@H)439C(C@H)440C(C@H)441C(C@H)442C(C@H)443C(C@H)444C(C@H)445C(C@H)446C(C@H)447C(C@H)448C(C@H)449C(C@H)450C(C@H)451C(C@H)452C(C@H)453C(C@H)454C(C@H)455C(C@H)456C(C@H)457C(C@H)458C(C@H)459C(C@H)460C(C@H)461C(C@H)462C(C@H)463C(C@H)464C(C@H)465C(C@H)466C(C@H)467C(C@H)468C(C@H)469C(C@H)470C(C@H)471C(C@H)472C(C@H)473C(C@H)474C(C@H)475C(C@H)476C(C@H)477C(C@H)478C(C@H)479C(C@H)480C(C@H)481C(C@H)482C(C@H)483C(C@H)484C(C@H)485C(C@H)486C(C@H)487C(C@H)488C(C@H)489C(C@H)490C(C@H)491C(C@H)492C(C@H)493C(C@H)494C(C@H)495C(C@H)496C(C@H)497C(C@H)498C(C@H)499C(C@H)500C(C@H)501C(C@H)502C(C@H)503C(C@H)504C(C@H)505C(C@H)506C(C@H)507C(C@H)508C(C@H)509C(C@H)510C(C@H)511C(C@H)512C(C@H)513C(C@H)514C(C@H)515C(C@H)516C(C@H)517C(C@H)518C(C@H)519C(C@H)520C(C@H)521C(C@H)522C(C@H)523C(C@H)524C(C@H)525C(C@H)526C(C@H)527C(C@H)528C(C@H)529C(C@H)530C(C@H)531C(C@H)532C(C@H)533C(C@H)534C(C@H)535C(C@H)536C(C@H)537C(C@H)538C(C@H)539C(C@H)540C(C@H)541C(C@H)542C(C@H)543C(C@H)544C(C@H)545C(C@H)546C(C@H)547C(C@H)548C(C@H)549C(C@H)550C(C@H)551C(C@H)552C(C@H)553C(C@H)554C(C@H)555C(C@H)556C(C@H)557C(C@H)558C(C@H)559C(C@H)560C(C@H)561C(C@H)562C(C@H)563C(C@H)564C(C@H)565C(C@H)566C(C@H)567C(C@H)568C(C@H)569C(C@H)570C(C@H)571C(C@H)572C(C@H)573C(C@H)574C(C@H)575C(C@H)576C(C@H)577C(C@H)578C(C@H)579C(C@H)580C(C@H)581C(C@H)582C(C@H)583C(C@H)584C(C@H)585C(C@H)586C(C@H)587C(C@H)588C(C@H)589C(C@H)590C(C@H)591C(C@H)592C(C@H)593C(C@H)594C(C@H)595C(C@H)596C(C@H)597C(C@H)598C(C@H)599C(C@H)600C(C@H)601C(C@H)602C(C@H)603C(C@H)604C(C@H)605C(C@H)606C(C@H)607C(C@H)608C(C@H)609C(C@H)610C(C@H)611C(C@H)612C(C@H)613C(C@H)614C(C@H)615C(C@H)616C(C@H)617C(C@H)618C(C@H)619C(C@H)620C(C@H)621C(C@H)622C(C@H)623C(C@H)624C(C@H)625C(C@H)626C(C@H)627C(C@H)628C(C@H)629C(C@H)630C(C@H)631C(C@H)632C(C@H)633C(C@H)634C(C@H)635C(C@H)636C(C@H)637C(C@H)638C(C@H)639C(C@H)640C(C@H)641C(C@H)642C(C@H)643C(C@H)644C(C@H)645C(C@H)646C(C@H)647C(C@H)648C(C@H)649C(C@H)650C(C@H)651C(C@H)652C(C@H)653C(C@H)654C(C@H)655C(C@H)656C(C@H)657C(C@H)658C(C@H)659C(C@H)660C(C@H)661C(C@H)662C(C@H)663C(C@H)664C(C@H)665C(C@H)666C(C@H)667C(C@H)668C(C@H)669C(C@H)670C(C@H)671C(C@H)672C(C@H)673C(C@H)674C(C@H)675C(C@H)676C(C@H)677C(C@H)678C(C@H)679C(C@H)680C(C@H)681C(C@H)682C(C@H)683C(C@H)684C(C@H)685C(C@H)686C(C@H)687C(C@H)688C(C@H)689C(C@H)690C(C@H)691C(C@H)692C(C@H)693C(C@H)694C(C@H)695C(C@H)696C(C@H)697C(C@H)698C(C@H)699C(C@H)700C(C@H)701C(C@H)702C(C@H)703C(C@H)704C(C@H)705C(C@H)706C(C@H)707C(C@H)708C(C@H)709C(C@H)710C(C@H)711C(C@H)712C(C@H)713C(C@H)714C(C@H)715C(C@H)716C(C@H)717C(C@H)718C(C@H)719C(C@H)720C(C@H)721C(C@H)722C(C@H)723C(C@H)724C(C@H)725C(C@H)726C(C@H)727C(C@H)728C(C@H)729C(C@H)730C(C@H)731C(C@H)732C(C@H)733C(C@H)734C(C@H)735C(C@H)736C(C@H)737C(C@H)738C(C@H)739C(C@H)740C(C@H)741C(C@H)742C(C@H)743C(C@H)744C(C@H)745C(C@H)746C(C@H)747C(C@H)748C(C@H)749C(C@H)750C(C@H)751C(C@H)752C(C@H)753C(C@H)754C(C@H)755C(C@H)756C(C@H)757C(C@H)758C(C@H)759C(C@H)760C(C@H)761C(C@H)762C(C@H)763C(C@H)764C(C@H)765C(C@H)766C(C@H)767C(C@H)768C(C@H)769C(C@H)770C(C@H)771C(C@H)772C(C@H)773C(C@H)774C(C@H)775C(C@H)776C(C@H)777C(C@H)778C(C@H)779C(C@H)780C(C@H)781C(C@H)782C(C@H)783C(C@H)784C(C@H)785C(C@H)786C(C@H)787C(C@H)788C(C@H)789C(C@H)790C(C@H)791C(C@H)792C(C@H)793C(C@H)794C(C@H)795C(C@H)796C(C@H)797C(C@H)798C(C@H)799C(C@H)800C(C@H)801C(C@H)802C(C@H)803C(C@H)804C(C@H)805C(C@H)806C(C@H)807C(C@H)808C(C@H)809C(C@H)810C(C@H)811C(C@H)812C(C@H)813C(C@H)814C(C@H)815C(C@H)816C(C@H)817C(C@H)818C(C@H)819C(C@H)820C(C@H)821C(C@H)822C(C@H)823C(C@H)824C(C@H)825C(C@H)826C(C@H)827C(C@H)828C(C@H)829C(C@H)830C(C@H)831C(C@H)832C(C@H)833C(C@H)834C(C@H)835C(C@H)836C(C@H)837C(C@H)838C(C@H)839C(C@H)840C(C@H)841C(C@H)842C(C@H)843C(C@H)844C(C@H)845C(C@H)846C(C@H)847C(C@H)848C(C@H)849C(C@H)850C(C@H)851C(C@H)852C(C@H)853C(C@H)854C(C@H)855C(C@H)856C(C@H)857C(C@H)858C(C@H)859C(C@H)860C(C@H)861C(C@H)862C(C@H)863C(C@H)864C(C@H)865C(C@H)866C(C@H)867C(C@H)868C(C@H)869C(C@H)870C(C@H)871C(C@H)872C(C@H)873C(C@H)874C(C@H)875C(C@H)876C(C@H)877C(C@H)878C(C@H)879C(C@H)880C(C@H)881C(C@H)882C(C@H)883C(C@H)884C(C@H)885C(C@H)886C(C@H)887C(C@H)888C(C@H)889C(C@H)890C(C@H)891C(C@H)892C(C@H)893C(C@H)894C(C@H)895C(C@H)896C(C@H)897C(C@H)898C(C@H)899C(C@H)900C(C@H)901C(C@H)902C(C@H)903C(C@H)904C(C@H)905C(C@H)906C(C@H)907C(C@H)908C(C@H)909C(C@H)910C(C@H)911C(C@H)912C(C@H)913C(C@H)914C(C@H)915C(C@H)916C(C@H)917C(C@H)918C(C@H)919C(C@H)920C(C@H)921C(C@H)922C(C@H)923C(C@H)924C(C@H)925C(C@H)926C(C@H)927C(C@H)928C(C@H)929C(C@H)930C(C@H)931C(C@H)932C(C@H)933C(C@H)934C(C@H)935C(C@H)936C(C@H)937C(C@H)938C(C@H)939C(C@H)940C(C@H)941C(C@H)942C(C@H)943C(C@H)944C(C@H)945C(C@H)946C(C@H)947C(C@H)948C(C@H)949C(C@H)950C(C@H)951C(C@H)952C(C@H)953C(C@H)954C(C@H)955C(C@H)956C(C@H)957C(C@H)958C(C@H)959C(C@H)960C(C@H)961C(C@H)962C(C@H)963C(C@H)964C(C@H)965C(C@H)966C(C@H)967C(C@H)968C(C@H)969C(C@H)970C(C@H)971C(C@H)972C(C@H)973C(C@H)974C(C@H)975C(C@H)976C(C@H)977C(C@H)978C(C@H)979C(C@H)980C(C@H) |

Supplementary Table S2:

Detailed table of XP Docking using Schrodinger's Glide module

| ZINC_ID      | xLogP | ApolarDesolvation | PolarDesolvation | H Donors | H Acceptors | Charge | MolecularWeight | RotatableBonds | SMILES                                                                                           |
|--------------|-------|-------------------|------------------|----------|-------------|--------|-----------------|----------------|--------------------------------------------------------------------------------------------------|
| ZINC08439503 | 6.13  | 13.77             | -21.73           | 1        | 5           | 0      | 445.559         | 7              | CCOC1cccc(c1)[C@H]2C3=C(CC(CC3=O)(C)C)NC(=C2C(=O)OCc4cccc4)C                                     |
| ZINC08439503 | 6.25  | 0.04              | -9.3             | 0        | 5           | 0      | 445.559         | 7              | CCOC1cccc(c1)[C@H]2C3C(=O)CC(C=C3N=C(C2C(=O)OCc4cccc4)C)C(C)C                                    |
| ZINC02170668 | 6.61  | 6.79              | -4.82            | 0        | 2           | 0      | 429.404         | 3              | Cc1ccc2c(c1)[C@H](CC(N2C(=O)c3ccc(cc3)C(F)F)F)C(F)F)C(C)C                                        |
| ZINC08439502 | 4.72  | 0.47              | -24.2            | 1        | 13          | 0      | 607.616         | 14             | CC1=NC(=C)[C@@H](C1C(=O)OCCOC(=O)c2ccc(cc2)NC(=O)C)c3ccc(c3)[N+](=O)[O-]C(=O)OC[C@H]4CCCCO4)C    |
| ZINC08439502 | 4.91  | 0.48              | -21.53           | 1        | 13          | 0      | 607.616         | 14             | CC1=NC(=C)[C@@H](C1C(=O)OC[C@H]2CCCCO2)c3ccc(c3)[N+](=O)[O-]C(=O)OCCOC(=O)c4ccc(cc4)NC(=O)C      |
| ZINC08439502 | 4.91  | 1.86              | -26.98           | 1        | 13          | 0      | 607.616         | 14             | CC1=NC(=C)[C@@H](C1C(=O)OC[C@H]2CCCCO2)c3ccc(c3)[N+](=O)[O-]C(=O)OCCOC(=O)c4ccc(cc4)NC(=O)C      |
| ZINC08439502 | 4.72  | 0.44              | -22.01           | 1        | 13          | 0      | 607.616         | 14             | CC1=NC(=C)[C@@H](C1C(=O)OC[C@H]2CCCCO2)c3ccc(c3)[N+](=O)[O-]C(=O)OCCOC(=O)c4ccc(cc4)NC(=O)C      |
| ZINC02170670 | 6.61  | 6.82              | -4.84            | 0        | 2           | 0      | 429.404         | 3              | Cc1ccc2c(c1)[C@H](CC(N2C(=O)c3ccc(cc3)C(F)F)F)C(F)F)C(C)C                                        |
| ZINC08439501 | 4.72  | 0.32              | -22.83           | 1        | 13          | 0      | 607.616         | 14             | CC1=NC(=C)[C@@H](C1C(=O)OCCOC(=O)c2ccc(cc2)NC(=O)C)c3ccc(c3)[N+](=O)[O-]C(=O)OC[C@H]4CCCCO4)C    |
| ZINC08439501 | 4.91  | 0.35              | -21.78           | 1        | 13          | 0      | 607.616         | 14             | CC1=NC(=C)[C@@H](C1C(=O)OC[C@H]2CCCCO2)c3ccc(c3)[N+](=O)[O-]C(=O)OCCOC(=O)c4ccc(cc4)NC(=O)C      |
| ZINC08439501 | 4.91  | 1.73              | -31.09           | 1        | 13          | 0      | 607.616         | 14             | CC1=NC(=C)[C@@H](C1C(=O)OC[C@H]2CCCCO2)c3ccc(c3)[N+](=O)[O-]C(=O)OCCOC(=O)c4ccc(cc4)NC(=O)C      |
| ZINC08439501 | 4.72  | 0.4               | -21.79           | 1        | 13          | 0      | 607.616         | 14             | CC1=NC(=C)[C@@H](C1C(=O)OC[C@H]2CCCCO2)c3ccc(c3)[N+](=O)[O-]C(=O)OCCOC(=O)c4ccc(cc4)NC(=O)C      |
| ZINC08439500 | 6.13  | 13.76             | -21.68           | 1        | 5           | 0      | 445.559         | 7              | CCOC1cccc(c1)[C@H]2C3=C(CC(CC3=O)(C)C)NC(=C2C(=O)OCc4cccc4)C(C)C                                 |
| ZINC08439500 | 6.25  | -0.1              | -8.59            | 0        | 5           | 0      | 445.559         | 7              | CCOC1cccc(c1)[C@H]2C3C(=O)CC(C=C3N=C(C2C(=O)OCc4cccc4)C)C(C)C                                    |
| ZINC00969336 | 5.7   | -0.23             | -6.88            | 0        | 4           | 0      | 448.371         | 4              | CC1=NC2=C([C@@H](C1C(=O)OC)c3ccc(cc3)C)C(C)C(=O)C[C@@H](C2)c4cccc4                               |
| ZINC00969336 | 5.88  | 0                 | -7.63            | 0        | 4           | 0      | 448.371         | 4              | COC(=O)C1[C@@H](C2C(=NC1=C)C[C@@H](CC2=O)c3ccc3)c4ccc(cc4)C1Cl                                   |
| ZINC00969336 | 5.88  | 1.22              | -13.48           | 0        | 4           | 0      | 448.371         | 4              | COC(=O)C1[C@@H](C[C@@H]2C(=NC1=O)C[C@@H](CC2=O)c3ccc3)c4ccc(cc4)C1Cl                             |
| ZINC00969336 | 5.7   | -0.12             | -9.05            | 0        | 4           | 0      | 448.371         | 4              | CC1=C([C@@H]([C@@H]2C(=N1)C[C@@H](CC2=O)c3ccc3)c4ccc(cc4)C)C(=O)OC                               |
| ZINC00969337 | 5.7   | -0.23             | -7.01            | 0        | 4           | 0      | 448.371         | 4              | CC1=NC2=C([C@@H](C1C(=O)OC)c3ccc(cc3)C)C(C)C(=O)C[C@@H](C2)c4cccc4                               |
| ZINC00969337 | 5.88  | -0.24             | -7.99            | 0        | 4           | 0      | 448.371         | 4              | COC(=O)C1[C@@H](C2C(=NC1=C)C[C@@H](CC2=O)c3ccc3)c4ccc(cc4)C1Cl                                   |
| ZINC00969337 | 5.88  | 0.99              | -7.38            | 0        | 4           | 0      | 448.371         | 4              | COC(=O)C1[C@@H](C[C@@H]2C(=NC1=O)C[C@@H](CC2=O)c3ccc3)c4ccc(cc4)C1Cl                             |
| ZINC00969337 | 5.7   | -0.18             | -9.19            | 0        | 4           | 0      | 448.371         | 4              | CC1=C([C@@H]([C@@H]2C(=N1)C[C@@H](CC2=O)c3ccc3)c4ccc(cc4)C)C(=O)OC                               |
| ZINC00969338 | 5.7   | -0.32             | -7.37            | 0        | 4           | 0      | 448.371         | 4              | CC1=NC2=C([C@@H](C1C(=O)OC)c3ccc(cc3)C)C(C)C(=O)C[C@@H](C2)c4cccc4                               |
| ZINC00969338 | 5.88  | -0.23             | -7.64            | 0        | 4           | 0      | 448.371         | 4              | COC(=O)C1[C@@H](C2C(=NC1=C)C[C@@H](CC2=O)c3ccc3)c4ccc(cc4)C1Cl                                   |
| ZINC00969338 | 5.88  | 0.98              | -7.31            | 0        | 4           | 0      | 448.371         | 4              | COC(=O)C1[C@@H](C[C@@H]2C(=NC1=O)C[C@@H](CC2=O)c3ccc3)c4ccc(cc4)C1Cl                             |
| ZINC00969338 | 5.7   | -0.11             | -9.02            | 0        | 4           | 0      | 448.371         | 4              | CC1=C([C@@H]([C@@H]2C(=N1)C[C@@H](CC2=O)c3ccc3)c4ccc(cc4)C)C(=O)OC                               |
| ZINC00969339 | 5.7   | -0.23             | -6.86            | 0        | 4           | 0      | 448.371         | 4              | CC1=NC2=C([C@@H](C1C(=O)OC)c3ccc(cc3)C)C(C)C(=O)C[C@@H](C2)c4cccc4                               |
| ZINC00969339 | 5.88  | -0.17             | -8.15            | 0        | 4           | 0      | 448.371         | 4              | COC(=O)C1[C@@H](C2C(=NC1=C)C[C@@H](CC2=O)c3ccc3)c4ccc(cc4)C1Cl                                   |
| ZINC00969339 | 5.88  | 1.25              | -12.89           | 0        | 4           | 0      | 448.371         | 4              | COC(=O)C1[C@@H](C[C@@H]2C(=NC1=O)C[C@@H](CC2=O)c3ccc3)c4ccc(cc4)C1Cl                             |
| ZINC00969339 | 5.7   | -0.29             | -9.62            | 0        | 4           | 0      | 448.371         | 4              | CC1=C([C@@H]([C@@H]2C(=N1)C[C@@H](CC2=O)c3ccc3)c4ccc(cc4)C)C(=O)OC                               |
| ZINC04113089 | 3.87  | -0.3              | -51.72           | 0        | 9           | -1     | 469.495         | 6              | CC1=NC2=C([C@@H](C1C(=O)OC)c3ccc(cc3)C)C(C)C(=O)N+([O-])C(=O)C[C@@H](C2)c4cccc4                  |
| ZINC04113089 | 4.05  | -0.24             | -53.07           | 0        | 9           | -1     | 469.495         | 6              | COC1ccc(cc1O-)]N+([O-])C(=O)OC[C@H]2C3C(=NC(=O)C2C(=O)OC)C[C@@H](CC3=O)c4cccc4                   |
| ZINC04113089 | 4.05  | 1.09              | -54.64           | 0        | 9           | -1     | 469.495         | 6              | COC1ccc(cc1O-)]N+([O-])C(=O)OC[C@H]2C3C(=NC(=O)C2C(=O)OC)C[C@@H](CC3=O)c4cccc4                   |
| ZINC04113089 | 3.87  | -0.36             | -56.02           | 0        | 9           | -1     | 469.495         | 6              | CC1=C([C@@H]([C@@H]2C(=N1)C[C@@H](CC2=O)c3ccc3)c4ccc(cc4)OC)O-]]N+([O-])C(=O)OC                  |
| ZINC08439499 | 4.86  | -0.09             | -50.94           | 2        | 6           | 1      | 562.715         | 7              | CS[C@@H]1[C@@H]2[C@@H](C1=O)N(C2=O)C3CCCC3[C@@H]4([NH2+])c5cccc5N(C4=O)C6CCCC7C6CCCC7            |
| ZINC04113088 | 3.87  | -0.4              | -54.64           | 0        | 9           | -1     | 469.495         | 6              | CC1=NC2=C([C@@H](C1C(=O)OC)c3ccc(cc3)C)C(C)C(=O)N+([O-])C(=O)C[C@@H](C2)c4cccc4                  |
| ZINC04113088 | 4.05  | -0.3              | -53.46           | 0        | 9           | -1     | 469.495         | 6              | COC1ccc(cc1O-)]N+([O-])C(=O)OC[C@H]2C3C(=NC(=O)C2C(=O)OC)C[C@@H](CC3=O)c4cccc4                   |
| ZINC04113088 | 4.05  | 1.01              | -62.41           | 0        | 9           | -1     | 469.495         | 6              | COC1ccc(cc1O-)]N+([O-])C(=O)OC[C@H]2C3C(=NC(=O)C2C(=O)OC)C[C@@H](CC3=O)c4cccc4                   |
| ZINC04113088 | 3.87  | -0.26             | -54.15           | 0        | 9           | -1     | 469.495         | 6              | CC1=C([C@@H]([C@@H]2C(=N1)C[C@@H](CC2=O)c3ccc3)c4ccc(cc4)OC)O-]]N+([O-])C(=O)OC                  |
| ZINC04113087 | 3.87  | -0.29             | -52.25           | 0        | 9           | -1     | 469.495         | 6              | CC1=NC2=C([C@@H](C1C(=O)OC)c3ccc(cc3)C)C(C)C(=O)N+([O-])C(=O)C[C@@H](C2)c4cccc4                  |
| ZINC04113087 | 4.05  | -0.14             | -51.61           | 0        | 9           | -1     | 469.495         | 6              | COC1ccc(cc1O-)]N+([O-])C(=O)OC[C@H]2C3C(=NC(=O)C2C(=O)OC)C[C@@H](CC3=O)c4cccc4                   |
| ZINC04113087 | 4.05  | 1.16              | -58.71           | 0        | 9           | -1     | 469.495         | 6              | COC1ccc(cc1O-)]N+([O-])C(=O)OC[C@H]2C3C(=NC(=O)C2C(=O)OC)C[C@@H](CC3=O)c4cccc4                   |
| ZINC04113087 | 3.87  | -0.26             | -53.87           | 0        | 9           | -1     | 469.495         | 6              | CC1=C([C@@H]([C@@H]2C(=N1)C[C@@H](CC2=O)c3ccc3)c4ccc(cc4)OC)O-]]N+([O-])C(=O)OC                  |
| ZINC04113086 | 3.87  | -0.3              | -51.44           | 0        | 9           | -1     | 469.495         | 6              | CC1=NC2=C([C@@H](C1C(=O)OC)c3ccc(cc3)C)C(C)C(=O)N+([O-])C(=O)C[C@@H](C2)c4cccc4                  |
| ZINC04113086 | 4.05  | -0.24             | -53.14           | 0        | 9           | -1     | 469.495         | 6              | COC1ccc(cc1O-)]N+([O-])C(=O)OC[C@H]2C3C(=NC(=O)C2C(=O)OC)C[C@@H](CC3=O)c4cccc4                   |
| ZINC04113086 | 4.05  | 1.18              | -59.82           | 0        | 9           | -1     | 469.495         | 6              | COC1ccc(cc1O-)]N+([O-])C(=O)OC[C@H]2C3C(=NC(=O)C2C(=O)OC)C[C@@H](CC3=O)c4cccc4                   |
| ZINC04113086 | 3.87  | -0.36             | -55.58           | 0        | 9           | -1     | 469.495         | 6              | CC1=C([C@@H]([C@@H]2C(=N1)C[C@@H](CC2=O)c3ccc3)c4ccc(cc4)OC)O-]]N+([O-])C(=O)OC                  |
| ZINC08439498 | 4.72  | 0.35              | -23.42           | 1        | 13          | 0      | 607.616         | 14             | CC1=NC(=C)[C@@H](C1C(=O)OCCOC(=O)c2ccc(cc2)NC(=O)C)c3ccc(c3)[N+](=O)[O-]C(=O)OC[C@H]4CCCCO4)C    |
| ZINC08439498 | 4.91  | 0.28              | -22.95           | 1        | 13          | 0      | 607.616         | 14             | CC1=NC(=C)[C@@H](C1C(=O)OC[C@H]2CCCCO2)c3ccc(c3)[N+](=O)[O-]C(=O)OCCOC(=O)c4ccc(cc4)NC(=O)C      |
| ZINC08439498 | 4.91  | 1.69              | -26.02           | 1        | 13          | 0      | 607.616         | 14             | CC1=NC(=C)[C@@H](C1C(=O)OC[C@H]2CCCCO2)c3ccc(c3)[N+](=O)[O-]C(=O)OCCOC(=O)c4ccc(cc4)NC(=O)C      |
| ZINC08439498 | 4.72  | 0.32              | -22.96           | 1        | 13          | 0      | 607.616         | 14             | CC1=NC(=C)[C@@H](C1C(=O)OC[C@H]2CCCCO2)c3ccc(c3)[N+](=O)[O-]C(=O)OCCOC(=O)c4ccc(cc4)NC(=O)C      |
| ZINC08439497 | 4.86  | 0.29              | -50.16           | 2        | 6           | 1      | 562.715         | 7              | CS[C@@H]1[C@@H]2[C@@H](C1=O)N(C2=O)C3CCCC3[C@@H]4([NH2+])c5cccc5N(C4=O)C6CCCC7C6CCCC7            |
| ZINC08439495 | 4.72  | 0.24              | -21.67           | 1        | 13          | 0      | 607.616         | 14             | CC1=NC(=C)[C@@H](C1C(=O)OCCOC(=O)c2ccc(cc2)NC(=O)C)c3ccc(c3)[N+](=O)[O-]C(=O)OC[C@H]4CCCCO4)C    |
| ZINC08439495 | 4.91  | 0.27              | -20.67           | 1        | 13          | 0      | 607.616         | 14             | CC1=NC(=C)[C@@H](C1C(=O)OC[C@H]2CCCCO2)c3ccc(c3)[N+](=O)[O-]C(=O)OCCOC(=O)c4ccc(cc4)NC(=O)C      |
| ZINC08439495 | 4.91  | 1.42              | -21.92           | 1        | 13          | 0      | 607.616         | 14             | CC1=NC(=C)[C@@H](C1C(=O)OC[C@H]2CCCCO2)c3ccc(c3)[N+](=O)[O-]C(=O)OCCOC(=O)c4ccc(cc4)NC(=O)C      |
| ZINC08439495 | 4.72  | 0.32              | -21.07           | 1        | 13          | 0      | 607.616         | 14             | CC1=NC(=C)[C@@H](C1C(=O)OC[C@H]2CCCCO2)c3ccc(c3)[N+](=O)[O-]C(=O)OCCOC(=O)c4ccc(cc4)NC(=O)C      |
| ZINC08439494 | 5.31  | -0.21             | -8.64            | 0        | 4           | 0      | 452.348         | 5              | CC1=NC2=C([C@@H](C1C(=O)OC)c3ccc3)c4cccc4Br)C(=O)CC2                                             |
| ZINC08439494 | 5.49  | -0.15             | -9.56            | 0        | 4           | 0      | 452.348         | 5              | C=C1C([C@@H](C2C(=N1)CCCC2=O)c3ccc3Br)C(=O)OCc4cccc4                                             |
| ZINC08439494 | 5.49  | 1.18              | -10.69           | 0        | 4           | 0      | 452.348         | 5              | C=C1C([C@@H](C2C(=N1)CCCC2=O)c3ccc3Br)C(=O)OCc4cccc4                                             |
| ZINC08439494 | 5.31  | -0.27             | -12.23           | 0        | 4           | 0      | 452.348         | 5              | CC1=C([C@@H]([C@@H]2C(=N1)CCCC2=O)c3ccc3Br)C(=O)OCc4cccc4                                        |
| ZINC08439493 | 5.78  | 2.93              | -63.83           | 2        | 13          | 1      | 671.727         | 17             | CC1=NC(=C)[C@@H](C1C(=O)OC)C(NH+)(C)C2CCCC2)c3ccc(c3)[N+](=O)[O-]C(=O)OCCOC(=O)c4ccc(cc4)NC(=O)C |

**Supplementary Table S2:**  
**Detailed table of XP Docking using Schrodinger's Glide module**

| ZINC_ID      | sLogP | ApolarDesolvation | PolarDesolvation | H Donors | H Acceptors | Charge | MolecularWeight | RotatableBonds | SMILES                                                                                                |
|--------------|-------|-------------------|------------------|----------|-------------|--------|-----------------|----------------|-------------------------------------------------------------------------------------------------------|
| ZINC08439493 | 5.96  | 3.05              | -57.23           | 2        | 13          | 1      | 671.727         | 17             | CC1=NC(=C)C(C@H)(C1C(=O)O)COC(=O)C2=CC(=C)N(C)C3=CC(=C)N+([=O])O-]C(=O)OCC(NH+)(C)C4=CCCC4            |
| ZINC08439493 | 5.96  | 4.28              | -65              | 2        | 13          | 1      | 671.727         | 17             | CC1=NC(=C)C(C@H)(C@H)1C(=O)OCCOC(=O)C2=CC(=C)N(C)C3=CC(=C)N+([=O])O-]C(=O)OCC(NH+)(C)C4=CCCC4         |
| ZINC08439493 | 5.78  | 2.79              | -57.11           | 2        | 13          | 1      | 671.727         | 17             | CC1=NC(=C)C(C@H)(C@H)1C(=O)OCCOC(=O)C2=CC(=C)N(C)C3=CC(=C)N+([=O])O-]C(=O)OCC(NH+)(C)C4=CCCC4         |
| ZINC08439492 | 5.78  | 2.87              | -55.72           | 2        | 13          | 1      | 671.727         | 17             | CC1=NC(=C)C(C@H)(C1C(=O)O)COC(NH+)(C)C2=CC(=C)C3=CC(=C)N+([=O])O-]C(=O)OCCOC(=O)C4=CC(=C)N(C)C5=CCCC5 |
| ZINC08439492 | 5.96  | 2.95              | -53.96           | 2        | 13          | 1      | 671.727         | 17             | CC1=NC(=C)C(C@H)(C1C(=O)O)COC(=O)C2=CC(=C)N(C)C3=CC(=C)N+([=O])O-]C(=O)OCC(NH+)(C)C4=CCCC4            |
| ZINC08439492 | 5.96  | 4.08              | -55.49           | 2        | 13          | 1      | 671.727         | 17             | CC1=NC(=C)C(C@H)(C@H)1C(=O)OCCOC(=O)C2=CC(=C)N(C)C3=CC(=C)N+([=O])O-]C(=O)OCC(NH+)(C)C4=CCCC4         |
| ZINC08439492 | 5.78  | 2.8               | -51.87           | 2        | 13          | 1      | 671.727         | 17             | CC1=NC(=C)C(C@H)(C@H)1C(=O)OCCOC(=O)C2=CC(=C)N(C)C3=CC(=C)N+([=O])O-]C(=O)OCC(NH+)(C)C4=CCCC4         |
| ZINC0643341  | 4.5   | -1.96             | -18.64           | 1        | 5           | 0      | 448.997         | 9              | COc1cccc1NC(=O)CSc2nc3c(c4c(s3)C(C@H)(CC4)C)C(=O)N2C                                                  |
| ZINC08439491 | 4.41  | -3.74             | -24.21           | 3        | 14          | 0      | 629.626         | 14             | CC1=NC(=C)C(C@H)(C1C(=O)O)COC(NC(=O)C2=CC(=C)N+([=O])O-]C(=O)OCCNC(=O)C4=CCCC4                        |
| ZINC08439491 | 4.59  | -3.68             | -22.21           | 3        | 14          | 0      | 629.626         | 14             | CC1=NC(=C)C(C@H)(C1C(=O)O)COC(NC(=O)C2=CC(=C)N+([=O])O-]C(=O)OCCNC(=O)C4=CCCC4                        |
| ZINC08439491 | 4.59  | -2.5              | -27.94           | 3        | 14          | 0      | 629.626         | 14             | CC1=NC(=C)C(C@H)(C@H)1C(=O)OCCNC(=O)C2=CC(=C)N+([=O])O-]C(=O)OCCNC(=O)C4=CCCC4                        |
| ZINC08439491 | 4.41  | -3.94             | -22.95           | 3        | 14          | 0      | 629.626         | 14             | CC1=NC(=C)C(C@H)(C@H)1C(=O)OCCNC(=O)C2=CC(=C)N+([=O])O-]C(=O)OCCNC(=O)C4=CCCC4                        |
| ZINC0643337  | 4.57  | -1.5              | -12.65           | 1        | 6           | 0      | 443.594         | 6              | COc1cccc1NC(=O)CSc2nc3c(c4c(s3)C(C@H)(CC4)C)C(=O)N2C                                                  |
| ZINC08439490 | 5.31  | -0.2              | -8.68            | 0        | 4           | 0      | 452.348         | 5              | CC1=NC2=C(C(C@H)(C1C(=O)O)COC3=CC(=C)N+([=O])O-]C(=O)OCC2)C3=CC(=C)N+([=O])O-]C(=O)OCC2               |
| ZINC08439490 | 5.49  | -0.38             | -9.18            | 0        | 4           | 0      | 452.348         | 5              | C=C1C(C@H)(C2C(=N1)CCC2=O)C3=CC(=C)N+([=O])O-]C(=O)OCC3                                               |
| ZINC08439490 | 5.49  | 1.01              | -15.95           | 0        | 4           | 0      | 452.348         | 5              | C=C1C(C@H)(C(C@H)2C(=N1)CCC2=O)C3=CC(=C)N+([=O])O-]C(=O)OCC3                                          |
| ZINC08439490 | 5.31  | -0.03             | -12.21           | 0        | 4           | 0      | 452.348         | 5              | C=C1C(C@H)(C(C@H)2C(=N1)CCC2=O)C3=CC(=C)N+([=O])O-]C(=O)OCC3                                          |
| ZINC08439489 | 4.41  | -3.67             | -28.05           | 3        | 14          | 0      | 629.626         | 14             | CC1=NC(=C)C(C@H)(C1C(=O)O)COC(NC(=O)C2=CC(=C)N+([=O])O-]C(=O)OCCNC(=O)C4=CCCC4                        |
| ZINC08439489 | 4.59  | -3.51             | -26.66           | 3        | 14          | 0      | 629.626         | 14             | CC1=NC(=C)C(C@H)(C@H)1C(=O)OCCNC(=O)C2=CC(=C)N+([=O])O-]C(=O)OCCNC(=O)C4=CCCC4                        |
| ZINC08439489 | 4.59  | -2.16             | -39.94           | 3        | 14          | 0      | 629.626         | 14             | CC1=NC(=C)C(C@H)(C@H)1C(=O)OCCNC(=O)C2=CC(=C)N+([=O])O-]C(=O)OCCNC(=O)C4=CCCC4                        |
| ZINC08439489 | 4.41  | -3.76             | -27.95           | 3        | 14          | 0      | 629.626         | 14             | CC1=NC(=C)C(C@H)(C@H)1C(=O)OCCNC(=O)C2=CC(=C)N+([=O])O-]C(=O)OCCNC(=O)C4=CCCC4                        |
| ZINC0643339  | 4.57  | -1.5              | -12.68           | 1        | 6           | 0      | 443.594         | 6              | COc1cccc1NC(=O)CSc2nc3c(c4c(s3)C(C@H)(CC4)C)C(=O)N2C                                                  |
| ZINC08439487 | 6.14  | -4.09             | -26.41           | 4        | 14          | 0      | 644.637         | 14             | CC1=NC(=C)C(C@H)(C1C(=O)O)COC(NC(=O)C2=CC(=C)N+([=O])O-]C(=O)OCCNC(=O)C4=CCCC4                        |
| ZINC08439487 | 6.32  | -4.12             | -25.49           | 4        | 14          | 0      | 644.637         | 14             | CC1=NC(=C)C(C@H)(C1C(=O)O)COC(NC(=O)C2=CC(=C)N+([=O])O-]C(=O)OCCNC(=O)C4=CCCC4                        |
| ZINC08439487 | 6.32  | -2.62             | -32.15           | 4        | 14          | 0      | 644.637         | 14             | CC1=NC(=C)C(C@H)(C@H)1C(=O)OCCNC(=O)C2=CC(=C)N+([=O])O-]C(=O)OCCNC(=O)C4=CCCC4                        |
| ZINC08439487 | 6.14  | -4.25             | -25.52           | 4        | 14          | 0      | 644.637         | 14             | CC1=NC(=C)C(C@H)(C@H)1C(=O)OCCNC(=O)C2=CC(=C)N+([=O])O-]C(=O)OCCNC(=O)C4=CCCC4                        |
| ZINC08439486 | 5.18  | 1.72              | -33.04           | 2        | 16          | 0      | 728.711         | 18             | CC1=NC(=C)C(C@H)(C1C(=O)O)COC(NC(=O)C2=CC(=C)N+([=O])O-]C(=O)OCCOC(=O)C4=CC(=C)N(C)C5=CCCC5           |
| ZINC08439486 | 5.36  | 1.71              | -31.89           | 2        | 16          | 0      | 728.711         | 18             | CC1=NC(=C)C(C@H)(C1C(=O)O)COC(NC(=O)C2=CC(=C)N+([=O])O-]C(=O)OCCOC(=O)C4=CC(=C)N(C)C5=CCCC5           |
| ZINC08439486 | 5.36  | 3.22              | -39.65           | 2        | 16          | 0      | 728.711         | 18             | CC1=NC(=C)C(C@H)(C@H)1C(=O)OCCOC(=O)C2=CC(=C)N+([=O])O-]C(=O)OCCOC(=O)C4=CC(=C)N(C)C5=CCCC5           |
| ZINC08439486 | 5.18  | 1.59              | -32.49           | 2        | 16          | 0      | 728.711         | 18             | CC1=NC(=C)C(C@H)(C@H)1C(=O)OCCOC(=O)C2=CC(=C)N+([=O])O-]C(=O)OCCOC(=O)C4=CC(=C)N(C)C5=CCCC5           |
| ZINC08439484 | 3.86  | -1.66             | -20.21           | 2        | 11          | 0      | 495.488         | 10             | CC1=NC(=C)C(C@H)(C1C(=O)O)COC(NC(=O)C2=CC(=C)N+([=O])O-]C(=O)OCCNC(=O)C4=CCCC4                        |
| ZINC08439484 | 4.05  | -1.55             | -20.28           | 2        | 11          | 0      | 495.488         | 10             | CC1=NC(=C)C(C@H)(C1C(=O)O)COC(NC(=O)C2=CC(=C)N+([=O])O-]C(=O)OCCNC(=O)C4=CCCC4                        |
| ZINC08439484 | 4.05  | -0.38             | -21.45           | 2        | 11          | 0      | 495.488         | 10             | CC1=NC(=C)C(C@H)(C@H)1C(=O)OCCNC(=O)C2=CC(=C)N+([=O])O-]C(=O)OCCNC(=O)C4=CCCC4                        |
| ZINC08439484 | 3.86  | -1.61             | -22.2            | 2        | 11          | 0      | 495.488         | 10             | CC1=NC(=C)C(C@H)(C@H)1C(=O)OCCNC(=O)C2=CC(=C)N+([=O])O-]C(=O)OCCNC(=O)C4=CCCC4                        |
| ZINC08439483 | 6.04  | 0.23              | -10.18           | 0        | 5           | 0      | 485.605         | 7              | CC1=NC2=C(C(C@H)(C1C(=O)O)COC3=CC(=C)N+([=O])O-]C(=O)OCC2)C3=CC(=C)N+([=O])O-]C(=O)OCC2               |
| ZINC08439483 | 6.23  | 0.29              | -10.64           | 0        | 5           | 0      | 485.605         | 7              | COc1cccc1NC(=O)CSc2nc3c(c4c(s3)C(C@H)(CC4)C)C(=O)N2C                                                  |
| ZINC08439483 | 6.23  | 1.62              | -12.42           | 0        | 5           | 0      | 485.605         | 7              | COC(=O)C1C@H(C2C(=N1)C)C@H(C2=O)C3=CC(=C)N+([=O])O-]C(=O)OCC3                                         |
| ZINC08439483 | 6.04  | 0.17              | -12.67           | 0        | 5           | 0      | 485.605         | 7              | COC(=O)C1C@H(C2C(=N1)C)C@H(C2=O)C3=CC(=C)N+([=O])O-]C(=O)OCC3                                         |
| ZINC02170649 | 6.9   | 1.9               | -9.46            | 0        | 4           | 0      | 435.276         | 6              | CC1=C(NC(=O)C2=CC(=C)N+([=O])O-]C(=O)OCC1)C3=CC(=C)N+([=O])O-]C(=O)OCC1                               |
| ZINC08439482 | 3.86  | -1.77             | -16.9            | 2        | 11          | 0      | 495.488         | 10             | CC1=NC(=C)C(C@H)(C1C(=O)O)COC(NC(=O)C2=CC(=C)N+([=O])O-]C(=O)OCCNC(=O)C4=CCCC4                        |
| ZINC08439482 | 4.05  | -1.83             | -17.62           | 2        | 11          | 0      | 495.488         | 10             | CC1=NC(=C)C(C@H)(C1C(=O)O)COC(NC(=O)C2=CC(=C)N+([=O])O-]C(=O)OCCNC(=O)C4=CCCC4                        |
| ZINC08439482 | 4.05  | -0.28             | -24.05           | 2        | 11          | 0      | 495.488         | 10             | CC1=NC(=C)C(C@H)(C@H)1C(=O)OCCNC(=O)C2=CC(=C)N+([=O])O-]C(=O)OCCNC(=O)C4=CCCC4                        |
| ZINC08439482 | 3.86  | -1.78             | -18.11           | 2        | 11          | 0      | 495.488         | 10             | CC1=NC(=C)C(C@H)(C@H)1C(=O)OCCNC(=O)C2=CC(=C)N+([=O])O-]C(=O)OCCNC(=O)C4=CCCC4                        |
| ZINC02170646 | 5.82  | -3.13             | -11.37           | 1        | 5           | 0      | 459.681         | 5              | C1CC(C1)NC(=O)CSc2nc3c(c4c(s3)C(C@H)(CC4)C)C(=O)N2C                                                   |
| ZINC02170635 | 7.97  | 16.98             | -12.53           | 1        | 5           | 0      | 545.774         | 8              | CC1=CCCC1NC(=O)CSc2nc3c(c4c(s3)C(C@H)(CC4)C)C(=O)N2C                                                  |
| ZINC08439481 | 4.71  | -0.61             | -24.19           | 1        | 12          | 0      | 579.606         | 13             | CC1=NC(=C)C(C@H)(C1C(=O)O)COC(NC(=O)C2=CC(=C)N+([=O])O-]C(=O)OCC(NC(=O)C4=CCCC4)C                     |
| ZINC08439481 | 4.89  | -0.52             | -21.58           | 1        | 12          | 0      | 579.606         | 13             | CC1=NC(=C)C(C@H)(C1C(=O)O)COC(NC(=O)C2=CC(=C)N+([=O])O-]C(=O)OCC(NC(=O)C4=CCCC4)C                     |
| ZINC08439481 | 4.89  | 0.87              | -27.51           | 1        | 12          | 0      | 579.606         | 13             | CC1=NC(=C)C(C@H)(C@H)1C(=O)OCCNC(=O)C2=CC(=C)N+([=O])O-]C(=O)OCCOC(=O)C4=CC(=C)N(C)C5=CCCC5           |
| ZINC08439481 | 4.71  | -0.57             | -22.68           | 1        | 12          | 0      | 579.606         | 13             | CC1=NC(=C)C(C@H)(C@H)1C(=O)OCCNC(=O)C2=CC(=C)N+([=O])O-]C(=O)OCCOC(=O)C4=CC(=C)N(C)C5=CCCC5           |
| ZINC08439480 | 4.71  | -0.72             | -22.71           | 1        | 12          | 0      | 579.606         | 13             | CC1=NC(=C)C(C@H)(C1C(=O)O)COC(NC(=O)C2=CC(=C)N+([=O])O-]C(=O)OCC(NC(=O)C4=CCCC4)C                     |
| ZINC08439480 | 4.71  | -0.74             | -22.16           | 1        | 12          | 0      | 579.606         | 13             | CC1=NC(=C)C(C@H)(C@H)1C(=O)OCCNC(=O)C2=CC(=C)N+([=O])O-]C(=O)OCCOC(=O)C4=CC(=C)N(C)C5=CCCC5           |
| ZINC08439479 | 6.04  | 0.23              | -10.3            | 0        | 5           | 0      | 485.605         | 7              | CC1=NC2=C(C(C@H)(C1C(=O)O)COC3=CC(=C)N+([=O])O-]C(=O)OCC2)C3=CC(=C)N+([=O])O-]C(=O)OCC2               |
| ZINC08439479 | 6.23  | 0.4               | -10.67           | 0        | 5           | 0      | 485.605         | 7              | COC(=O)C1C@H(C2C(=N1)C)C@H(C2=O)C3=CC(=C)N+([=O])O-]C(=O)OCC3                                         |
| ZINC08439479 | 6.23  | 1.71              | -19.68           | 0        | 5           | 0      | 485.605         | 7              | COC(=O)C1C@H(C2C(=N1)C)C@H(C2=O)C3=CC(=C)N+([=O])O-]C(=O)OCC3                                         |
| ZINC08439479 | 6.04  | 0.28              | -12.58           | 0        | 5           | 0      | 485.605         | 7              | C=C1C(C@H)(C(C@H)2C(=N1)CCC2=O)C3=CC(=C)N+([=O])O-]C(=O)OCC3                                          |
| ZINC02170638 | 7.97  | 0.56              | -11.86           | 1        | 5           | 0      | 545.774         | 8              | CC1=CCCC1NC(=O)CSc2nc3c(c4c(s3)C(C@H)(CC4)C)C(=O)N2C                                                  |
| ZINC08439478 | 4.71  | -0.52             | -24.16           | 1        | 12          | 0      | 579.606         | 13             | CC1=NC(=C)C(C@H)(C1C(=O)O)COC(NC(=O)C2=CC(=C)N+([=O])O-]C(=O)OCC(NC(=O)C4=CCCC4)C                     |
| ZINC08439478 | 4.89  | -0.42             | -21.4            | 1        | 12          | 0      | 579.606         | 13             | CC1=NC(=C)C(C@H)(C@H)1C(=O)OCCNC(=O)C2=CC(=C)N+([=O])O-]C(=O)OCCOC(=O)C4=CC(=C)N(C)C5=CCCC5           |
| ZINC08439478 | 4.71  | -0.46             | -22.16           | 1        | 12          | 0      | 579.606         | 13             | CC1=NC(=C)C(C@H)(C@H)1C(=O)OCCNC(=O)C2=CC(=C)N+([=O])O-]C(=O)OCCOC(=O)C4=CC(=C)N(C)C5=CCCC5           |
| ZINC02170633 | 7.28  | 1.6               | -8.54            | 0        | 3           | 0      | 443.41          | 6              | CCCC1N(C1)C(=O)CSc2nc3c(c4c(s3)C(C@H)(CC4)C)C(=O)N2C                                                  |
| ZINC08439477 | 5.9   | 0.93              | -47.8            | 2        | 6           | 1      | 537.039         | 4              | CC(C@H)1C@H2C@H(C1C(=O)N(C2=O)C3=CC(=C)N+([=O])O-]C(=O)OCC3)C@H4([NH2+])1)5cccc5N(C4=O)C6cccc7c6cccc7 |

Supplementary Table S2:

Detailed table of XP Docking using Schrodinger's Glide module

| ZINC_ID      | xtLogP | ApolarDesolvation | PolarDesolvation | H Donors | H Acceptors | Charge | MolecularWeight | RotatableBonds | SMILES                                                                                   |
|--------------|--------|-------------------|------------------|----------|-------------|--------|-----------------|----------------|------------------------------------------------------------------------------------------|
| ZINC08439476 | 4.71   | -0.71             | -21.15           | 1        | 12          | 0      | 579.606         | 13             | CC1=NC(=C)[C@H](C1C(=O)OCCO)c2ccc(cc2)NC(=O)C3CCCC(C3)N+([=O])O-]C(=O)OC[C@H]4CCCCO4)C   |
| ZINC08439476 | 4.89   | -0.68             | -20.04           | 1        | 12          | 0      | 579.606         | 13             | CC1=NC(=C)[C@H](C1C(=O)O)C(C@H)2CCO2)c3ccc(c3)N+([=O])O-]C(=O)OCCO4ccc(cc4)NC(=O)C       |
| ZINC08439476 | 4.89   | 0.47              | -21.48           | 1        | 12          | 0      | 579.606         | 13             | CC1=NC(=C)[C@H](C@H)1C(=O)O)C(C@H)2CCO2)c3ccc(c3)N+([=O])O-]C(=O)OCCO4ccc(cc4)NC(=O)C    |
| ZINC08439476 | 4.71   | -0.63             | -20.34           | 1        | 12          | 0      | 579.606         | 13             | CC1=NC(=C)[C@H](C@H)1C(=O)O)C(C@H)2CCO2)c3ccc(c3)N+([=O])O-]C(=O)OCCO4ccc(cc4)NC(=O)C    |
| ZINC08439475 | 6.04   | 0.15              | -10.43           | 0        | 5           | 0      | 485.605         | 7              | CC1=NC2=C[C@H](C1C(=O)O)C3CCCC(C3)OC4CCCCC4)C(=O)C[C@H](C2)C5CCCC5                       |
| ZINC08439475 | 6.23   | 0.3               | -10.54           | 0        | 5           | 0      | 485.605         | 7              | CO(C(=O)C1[C@H]([C2C(=NC1=C)C]C@H)(CC2=O)c3ccc(s3)c4ccc(c4)OCc5ccc5                      |
| ZINC08439475 | 6.23   | 1.56              | -11.4            | 0        | 5           | 0      | 485.605         | 7              | CO(C(=O)C1[C@H]([C@H]2C(=NC1=C)C]C@H)(CC2=O)c3ccc(s3)c4ccc(c4)OCc5ccc5                   |
| ZINC08439475 | 6.04   | 0.43              | -12.21           | 0        | 5           | 0      | 485.605         | 7              | CC1=C[C@H]([C@H]2C(=N1)C]C@H)(CC2=O)c3ccc(s3)c4ccc(c4)OCc5ccc5)C(=O)OC                   |
| ZINC08439474 | 5.9    | 0.52              | -51.13           | 2        | 6           | 1      | 537.039         | 4              | CC(C@H)1[C@H]2[C@H]([C(=O)N(C2=O)c3ccc(c3)C])C@H]4[NH2+]]1)c5ccc5N(C4=O)C6ccc7c6ccc7     |
| ZINC08439473 | 4.78   | -1.8              | -16.74           | 2        | 11          | 0      | 515.544         | 11             | COOC(=O)C1[C@H](C(=C(N=C1)C)C(=O)O)CCNC(=O)c2ccc(c2)O)c3ccc(s3)N+([=O])O-                |
| ZINC08439473 | 4.78   | -2.2              | -19.71           | 2        | 11          | 0      | 515.544         | 11             | COOC(=O)C1=C(N=C(C1C(=O)O)C)C(=O)O)CCNC(=O)c2ccc(c2)O)c3ccc(s3)N+([=O])O-                |
| ZINC08439473 | 4.96   | -3.16             | -19.01           | 2        | 11          | 0      | 515.544         | 11             | COOC(=O)C1[C@H](C(=C(N=C1)C)C(=O)O)CCNC(=O)c2ccc(c2)O)c3ccc(s3)N+([=O])O-                |
| ZINC08439471 | 4.78   | -1.97             | -14.84           | 2        | 11          | 0      | 515.544         | 11             | COOC(=O)C1[C@H](C(=C(N=C1)C)C(=O)O)CCNC(=O)c2ccc(c2)O)c3ccc(s3)N+([=O])O-                |
| ZINC08439471 | 4.78   | -2.21             | -16.43           | 2        | 11          | 0      | 515.544         | 11             | COOC(=O)C1=C(N=C(C1C(=O)O)C)C(=O)O)CCNC(=O)c2ccc(c2)O)c3ccc(s3)N+([=O])O-                |
| ZINC08439471 | 4.96   | -3.32             | -16.45           | 2        | 11          | 0      | 515.544         | 11             | COOC(=O)C1[C@H](C(=C(N=C1)C)C(=O)O)CCNC(=O)c2ccc(c2)O)c3ccc(s3)N+([=O])O-                |
| ZINC08439469 | 5.57   | -0.93             | -19.18           | 2        | 11          | 0      | 523.542         | 11             | CC1=NC(=C)[C@H](C1C(=O)O)CCNC(=O)c2ccc(c2)O)c3ccc(c3)N+([=O])O-]C(=O)O)C(C)C             |
| ZINC08439469 | 5.75   | 0.42              | -21.28           | 2        | 11          | 0      | 523.542         | 11             | CC1=NC(=C)[C@H](C@H)1C(=O)O)C(C)C2CCCC(C2)N+([=O])O-]C(=O)O)CCNC(=O)c3ccc(c3)O           |
| ZINC08439469 | 5.57   | -0.88             | -18.92           | 2        | 11          | 0      | 523.542         | 11             | CC1=NC(=C)[C@H](C@H)1C(=O)O)C(C)C2CCCC(C2)N+([=O])O-]C(=O)O)CCNC(=O)c3ccc(c3)O           |
| ZINC08439468 | 6.04   | 0.25              | -10.17           | 0        | 5           | 0      | 485.605         | 7              | CC1=NC2=C[C@H](C1C(=O)O)C3CCCC(C3)OC4CCCCC4)C(=O)C[C@H](C2)C5CCCC5                       |
| ZINC08439468 | 6.23   | 0.31              | -10.53           | 0        | 5           | 0      | 485.605         | 7              | CO(C(=O)C1[C@H](C@H)1C(=O)O)C(C)C2CCCC(C2)N+([=O])O-]C(=O)O)CCNC(=O)c3ccc(c3)O           |
| ZINC08439468 | 6.23   | 1.47              | -12.78           | 0        | 5           | 0      | 485.605         | 7              | CO(C(=O)C1[C@H](C@H)1C(=O)O)C(C)C2CCCC(C2)N+([=O])O-]C(=O)O)CCNC(=O)c3ccc(c3)O           |
| ZINC08439468 | 6.04   | 0.2               | -12.46           | 0        | 5           | 0      | 485.605         | 7              | CC1=C[C@H](C@H)1C(=O)O)C(C)C2CCCC(C2)N+([=O])O-]C(=O)O)CCNC(=O)c3ccc(c3)O                |
| ZINC02170629 | 7.2    | 1.24              | -8.86            | 0        | 4           | 0      | 473.436         | 8              | CCc1c(nc(s1)N)c2ccc(cc2)BrC1(=O)C3CCCC(C3)OCC                                            |
| ZINC08439467 | 5.57   | -0.86             | -20.04           | 2        | 11          | 0      | 523.542         | 11             | CC1=NC(=C)[C@H](C1C(=O)O)CCNC(=O)c2ccc(c2)O)c3ccc(c3)N+([=O])O-]C(=O)O)C(C)C             |
| ZINC08439467 | 5.75   | -0.87             | -16.89           | 2        | 11          | 0      | 523.542         | 11             | CC1=NC(=C)[C@H](C@H)1C(=O)O)C(C)C2CCCC(C2)N+([=O])O-]C(=O)O)CCNC(=O)c3ccc(c3)O           |
| ZINC08439467 | 5.75   | 0.41              | -20.71           | 2        | 11          | 0      | 523.542         | 11             | CC1=NC(=C)[C@H](C@H)1C(=O)O)C(C)C2CCCC(C2)N+([=O])O-]C(=O)O)CCNC(=O)c3ccc(c3)O           |
| ZINC08439467 | 5.57   | -0.96             | -16.9            | 2        | 11          | 0      | 523.542         | 11             | CC1=NC(=C)[C@H](C@H)1C(=O)O)C(C)C2CCCC(C2)N+([=O])O-]C(=O)O)CCNC(=O)c3ccc(c3)O           |
| ZINC02170623 | 7.54   | 2.61              | -15.4            | 0        | 4           | 0      | 478.617         | 7              | Cc1c(nc(s1)N)c2ccc(cc2)C(=O)O)CC4CCCC4)5ccc(cc5)OC                                       |
| ZINC06299035 | 6.29   | 18.46             | -14.63           | 1        | 5           | 0      | 518.686         | 9              | C[C@H](C(=O)NC(c1ccc(c1)c2ccc(c2)Sc3nnc(n3)C(c4ccc(c4)c5ccc5                             |
| ZINC06298704 | 6.29   | 18.46             | -14.77           | 1        | 5           | 0      | 518.686         | 9              | C[C@H](C(=O)NC(c1ccc(c1)c2ccc(c2)Sc3nnc(n3)C(c4ccc(c4)c5ccc5                             |
| ZINC08439466 | 4.73   | -2.22             | -54.27           | 1        | 12          | 1      | 599.686         | 12             | COOC(=O)C1[C@H](C(=C(N=C1)C)C(=O)O)CCNC(=O)c2ccc(c2)N+([=O])O-]C(=O)O)CCNC(=O)c3ccc(c3)O |
| ZINC08439466 | 4.73   | -2.46             | -59.5            | 1        | 12          | 1      | 599.686         | 12             | COOC(=O)C1=C(N=C(C1C(=O)O)C)C(=O)O)CCNC(=O)c2ccc(c2)N+([=O])O-]C(=O)O)CCNC(=O)c3ccc(c3)O |
| ZINC08439466 | 4.91   | -3.53             | -60.52           | 1        | 12          | 1      | 599.686         | 12             | COOC(=O)C1[C@H](C(=C(N=C1)C)C(=O)O)CCNC(=O)c2ccc(c2)N+([=O])O-]C(=O)O)CCNC(=O)c3ccc(c3)O |
| ZINC08439465 | 4.29   | -0.53             | -13.4            | 0        | 6           | 0      | 478.383         | 8              | CC1=NC2=C[C@H](C1C(=O)O)CCO(C)C3CCCC(C3)OC4CCCCC4)C(=O)O)CC2                             |
| ZINC08439465 | 4.47   | -0.42             | -13.66           | 0        | 6           | 0      | 478.383         | 8              | CC(C)OCCO(C(=O)C1[C@H](C2C(=NC1=C)CC(C2=O)c3ccc(cc3)OC)Br                                |
| ZINC08439465 | 4.47   | 0.79              | -16.62           | 0        | 6           | 0      | 478.383         | 8              | CC(C)OCCO(C(=O)C1[C@H](C@H)2C(=NC1=C)CC(C2=O)c3ccc(cc3)OC)Br                             |
| ZINC08439465 | 4.29   | -0.68             | -15.22           | 0        | 6           | 0      | 478.383         | 8              | CC1=C[C@H](C@H)1C(=O)O)C(C)C2CCCC(C2)N+([=O])O-]C(=O)O)CCO(C)C                           |
| ZINC08439464 | 4.73   | -2.27             | -56.95           | 1        | 12          | 1      | 599.686         | 12             | COOC(=O)C1[C@H](C(=C(N=C1)C)C(=O)O)CCNC(=O)c2ccc(c2)N+([=O])O-]C(=O)O)CCNC(=O)c3ccc(c3)O |
| ZINC08439464 | 4.73   | -2.5              | -62.21           | 1        | 12          | 1      | 599.686         | 12             | COOC(=O)C1=C(N=C(C1C(=O)O)C)C(=O)O)CCNC(=O)c2ccc(c2)N+([=O])O-]C(=O)O)CCNC(=O)c3ccc(c3)O |
| ZINC08439464 | 4.91   | -3.62             | -62.66           | 1        | 12          | 1      | 599.686         | 12             | COOC(=O)C1[C@H](C(=C(N=C1)C)C(=O)O)CCNC(=O)c2ccc(c2)N+([=O])O-]C(=O)O)CCNC(=O)c3ccc(c3)O |
| ZINC08439463 | 6.64   | 12.64             | -14.07           | 2        | 7           | 0      | 581.47          | 6              | Cc1c(c1n1)c2ccc(c2)O)C3CCCC(C3)C4CCCC(C4)Br]5c6nnc65)O)C6CCCC6                           |
| ZINC08439462 | 3.9    | -0.31             | -20.02           | 1        | 11          | 0      | 515.544         | 11             | CC1=NC(=C)[C@H](C1C(=O)O)C2CCCC(C2)N+([=O])O-]C(=O)O)CCO(C)C3CCCC(C3)NC(=O)C             |
| ZINC08439462 | 4.09   | -0.31             | -20.16           | 1        | 11          | 0      | 515.544         | 11             | CC1=NC(=C)[C@H](C1C(=O)O)CCO(C)C2CCCC(C2)N+([=O])O-]C(=O)O)C(=O)O)C                      |
| ZINC08439462 | 4.09   | 1.12              | -25.88           | 1        | 11          | 0      | 515.544         | 11             | CC1=NC(=C)[C@H](C@H)1C(=O)O)C(C)C2CCCC(C2)N+([=O])O-]C(=O)O)CCO(C)C                      |
| ZINC08439462 | 3.9    | -0.27             | -20.02           | 1        | 11          | 0      | 515.544         | 11             | CC1=NC(=C)[C@H](C@H)1C(=O)O)CCO(C)C2CCCC(C2)N+([=O])O-]C(=O)O)C(=O)O)C                   |
| ZINC0643314  | 6.06   | 2.9               | -11.85           | 0        | 6           | 0      | 438.549         | 9              | CC1c(nc(s1)N)c2ccc(cc2)C(=O)O)C(C)C3CCCC(C3)OC                                           |
| ZINC08439461 | 3.9    | -0.25             | -19.3            | 1        | 11          | 0      | 515.544         | 11             | CC1=NC(=C)[C@H](C1C(=O)O)C2CCCC(C2)N+([=O])O-]C(=O)O)CCO(C)C3CCCC(C3)NC(=O)C             |
| ZINC08439461 | 4.09   | -0.09             | -19.27           | 1        | 11          | 0      | 515.544         | 11             | CC1=NC(=C)[C@H](C@H)1C(=O)O)CCO(C)C2CCCC(C2)N+([=O])O-]C(=O)O)C(=O)O)C                   |
| ZINC08439461 | 4.09   | 1.02              | -19.83           | 1        | 11          | 0      | 515.544         | 11             | CC1=NC(=C)[C@H](C@H)1C(=O)O)CCO(C)C2CCCC(C2)N+([=O])O-]C(=O)O)C(=O)O)C                   |
| ZINC08439461 | 3.9    | -0.34             | -19.5            | 1        | 11          | 0      | 515.544         | 11             | CC1=NC(=C)[C@H](C@H)1C(=O)O)CCO(C)C2CCCC(C2)N+([=O])O-]C(=O)O)C(=O)O)C                   |
| ZINC08439460 | 5.64   | -2.26             | -31.11           | 3        | 14          | 0      | 658.664         | 15             | CC1=NC(=C)[C@H](C1C(=O)O)CCNC(=O)c2ccc(c2)O)c3ccc(c3)N+([=O])O-]C(=O)O)CCO(C)C           |
| ZINC08439460 | 5.82   | -2.12             | -27.88           | 3        | 14          | 0      | 658.664         | 15             | CC1=NC(=C)[C@H](C1C(=O)O)CCO(C)C2CCCC(C2)N+([=O])O-]C(=O)O)CCNC(=O)c4ccc(c4)O            |
| ZINC08439460 | 5.82   | -0.9              | -33.8            | 3        | 14          | 0      | 658.664         | 15             | CC1=NC(=C)[C@H](C@H)1C(=O)O)CCO(C)C2CCCC(C2)N+([=O])O-]C(=O)O)CCNC(=O)c4ccc(c4)O         |
| ZINC08439460 | 5.64   | -2.37             | -28.66           | 3        | 14          | 0      | 658.664         | 15             | CC1=NC(=C)[C@H](C@H)1C(=O)O)CCO(C)C2CCCC(C2)N+([=O])O-]C(=O)O)CCNC(=O)c4ccc(c4)O         |
| ZINC08439459 | 4.29   | -0.6              | -12.49           | 0        | 6           | 0      | 478.383         | 8              | CC1=NC2=C[C@H](C1C(=O)O)CCO(C)C3CCCC(C3)OC4CCCCC4)C(=O)O)CC2                             |
| ZINC08439459 | 4.47   | -0.47             | -13.64           | 0        | 6           | 0      | 478.383         | 8              | CC(C)OCCO(C(=O)C1[C@H](C2C(=NC1=C)CC(C2=O)c3ccc(cc3)OC)Br                                |
| ZINC08439459 | 4.47   | 0.48              | -12.37           | 0        | 6           | 0      | 478.383         | 8              | CC(C)OCCO(C(=O)C1[C@H](C@H)2C(=NC1=C)CC(C2=O)c3ccc(cc3)OC)Br                             |
| ZINC08439459 | 4.29   | -0.74             | -15.04           | 0        | 6           | 0      | 478.383         | 8              | CC1=C[C@H](C@H)1C(=O)O)C(C)C2CCCC(C2)N+([=O])O-]C(=O)O)CCO(C)C                           |
| ZINC02170620 | 4.93   | 0.59              | -24.2            | 0        | 6           | 0      | 474.007         | 6              | CC1=C(S)C[C@H]2(N1C3CCCC3)N(N=C(S2)C(=O)O)C4CCCC4)C(=O)O                                 |
| ZINC08439458 | 5.64   | -2.12             | -29.12           | 3        | 14          | 0      | 658.664         | 15             | CC1=NC(=C)[C@H](C1C(=O)O)CCNC(=O)c2ccc(c2)O)c3ccc(c3)N+([=O])O-]C(=O)O)CCO(C)C           |
| ZINC08439458 | 5.82   | -2.14             | -25.91           | 3        | 14          | 0      | 658.664         | 15             | CC1=NC(=C)[C@H](C1C(=O)O)CCO(C)C2CCCC(C2)N+([=O])O-]C(=O)O)CCNC(=O)c4ccc(c4)O            |

Supplementary Table S2:

Detailed table of XP Docking using Schrodinger's Glide module

| ZINC_ID      | sLogP | ApolarDesolvation | PolarDesolvation | H Donors | H Acceptors | Charge | MolecularWeight | RotatableBonds | SMILES                                                                                                     |
|--------------|-------|-------------------|------------------|----------|-------------|--------|-----------------|----------------|------------------------------------------------------------------------------------------------------------|
| ZINC08439458 | 5.82  | -0.87             | -29.6            | 3        | 14          | 0      | 658.664         | 15             | CC1=NC(=C)C(C@@H)(C@@H)1C(=O)OCCOC2ccc(cc2)NC(=O)C3cccc(c3)N+([=O])O-]C(=O)OCCNC(=O)C4cccc4O               |
| ZINC08439458 | 5.64  | -2.42             | -26.21           | 3        | 14          | 0      | 658.664         | 15             | CC1=NC(=C)C(C@@H)(C@@H)1C(=O)OCCOC2ccc(cc2)NC(=O)C3cccc(c3)N+([=O])O-]C(=O)OCCNC(=O)C4cccc4O               |
| ZINC02170616 | 4.93  | 0.84              | -10.38           | 0        | 6           | 0      | 474.007         | 6              | CC1=C(S)C@Z[N1Cc3cccc3]N=N(C(S2)C(=O)OC)C4cccc4C]C(=O)C                                                    |
| ZINC08439457 | 5.21  | -0.84             | -21.01           | 2        | 11          | 0      | 509.515         | 11             | CCOC(=O)C1=C@@H(C=C(N=C1)C)C(=O)OCCNC(=O)C2cccc2O)C3cccc(c3)N+([=O])O-                                     |
| ZINC08439457 | 5.21  | -1.08             | -22.5            | 2        | 11          | 0      | 509.515         | 11             | CCOC(=O)C1=C(N=C(C(C@@H)1c2cccc(c2)N+([=O])O-])C(=O)OCCNC(=O)C3cccc3O)C                                    |
| ZINC08439457 | 5.39  | -1.97             | -20.99           | 2        | 11          | 0      | 509.515         | 11             | CCOC(=O)C1=C@@H(C(C(=NC1=C)C)C(=O)OCCNC(=O)C2cccc2O)C3cccc(c3)N+([=O])O-                                   |
| ZINC08439456 | 4.17  | 0.55              | -56.19           | 2        | 7           | 1      | 546.644         | 7              | COc1ccc(cc1)N2C(=O)C@H]3C@H]([NH2+][C@@]4[C@@H]3C2=O)C5cccc5N(C4=O)C6cccc6F)CCSC                           |
| ZINC08439455 | 6.14  | 13.92             | -20.87           | 1        | 5           | 0      | 445.559         | 7              | Cc1cccc(c1)[C@H]2C3=C(C)C(C3=O)C(C)NC(=C2C(=O)OCCOC4cccc4)C                                                |
| ZINC08439455 | 6.26  | 0.27              | -9.7             | 0        | 5           | 0      | 445.559         | 7              | Cc1cccc(c1)[C@H]2C3C(=O)CC(C=C3N=C(C2C(=O)OCCOC4cccc4)C)C(C)C                                              |
| ZINC08439454 | 5.21  | -0.94             | -15.52           | 2        | 11          | 0      | 509.515         | 11             | CCOC(=O)C1=C@H(C(C(=NC1=C)C)C(=O)OCCNC(=O)C2cccc2O)C3cccc(c3)N+([=O])O-                                    |
| ZINC08439454 | 5.21  | -1.18             | -17.76           | 2        | 11          | 0      | 509.515         | 11             | CCOC(=O)C1=C(N=C(C(C@@H)1c2cccc(c2)N+([=O])O-])C(=O)OCCNC(=O)C3cccc3O)C                                    |
| ZINC08439454 | 5.39  | -2.3              | -16.17           | 2        | 11          | 0      | 509.515         | 11             | CCOC(=O)C1=C@H(C(C(=NC1=C)C)C(=O)OCCNC(=O)C2cccc2O)C3cccc(c3)N+([=O])O-                                    |
| ZINC08439452 | 4.21  | 1.2               | -18.96           | 1        | 11          | 0      | 523.542         | 12             | CCOC(=O)C1=C@H(C(C(=NC1=C)C)C(=O)OCCOC2ccc(cc2)NC(=O)C3cccc3N+([=O])O-                                     |
| ZINC08439452 | 4.21  | 0.81              | -19.11           | 1        | 11          | 0      | 523.542         | 12             | CCOC(=O)C1=C(N=C(C(C@@H)1c2cccc2N+([=O])O-])C(=O)OCCOC3ccc(cc3)NC(=O)C)C                                   |
| ZINC08439452 | 4.39  | -0.09             | -18.9            | 1        | 11          | 0      | 523.542         | 12             | CCOC(=O)C1=C@H(C(C(=NC1=C)C)C(=O)OCCOC2ccc(cc2)NC(=O)C3cccc3N+([=O])O-                                     |
| ZINC08439451 | 4.17  | 0.44              | -48.84           | 2        | 7           | 1      | 546.644         | 7              | COc1ccc(cc1)N2C(=O)C@H]3C@H]([NH2+][C@@]4[C@@H]3C2=O)C5cccc5N(C4=O)C6cccc6F)CCSC                           |
| ZINC08439450 | 6.14  | 13.69             | -20.28           | 1        | 5           | 0      | 445.559         | 7              | Cc1cccc(c1)[C@@H]2C3=C(C)C(C3=O)C(C)NC(=C2C(=O)OCCOC4cccc4)C                                               |
| ZINC08439450 | 6.26  | -0.07             | -8.68            | 0        | 5           | 0      | 445.559         | 7              | Cc1cccc(c1)[C@@H]2C3C(=O)CC(C=C3N=C(C2C(=O)OCCOC4cccc4)C)C(C)C                                             |
| ZINC08439449 | 4.21  | 1.42              | -15.72           | 1        | 11          | 0      | 523.542         | 12             | CCOC(=O)C1=C@H(C(C(=NC1=C)C)C(=O)OCCOC2ccc(cc2)NC(=O)C3cccc3N+([=O])O-                                     |
| ZINC08439449 | 4.21  | 1.28              | -16.43           | 1        | 11          | 0      | 523.542         | 12             | CCOC(=O)C1=C(N=C(C(C@@H)1c2cccc2N+([=O])O-])C(=O)OCCOC3ccc(cc3)NC(=O)C)C                                   |
| ZINC08439449 | 4.39  | 0.33              | -16.07           | 1        | 11          | 0      | 523.542         | 12             | CCOC(=O)C1=C@H(C(C(=NC1=C)C)C(=O)OCCOC2ccc(cc2)NC(=O)C3cccc3N+([=O])O-                                     |
| ZINC08439447 | 4.57  | 1.05              | -26.51           | 1        | 11          | 0      | 537.569         | 12             | CC1=NC(=C)C(C@@H)(C1C(=O)OCCOC2ccc(cc2)NC(=O)C3cccc3N+([=O])O-])C(=O)OCCOC3ccc(cc3)NC(=O)C                 |
| ZINC08439447 | 4.75  | 1.28              | -24.86           | 1        | 11          | 0      | 537.569         | 12             | CC1=NC(=C)C(C@@H)(C1C(=O)OCCOC2ccc(cc2)N+([=O])O-])C(=O)OCCOC3ccc(cc3)NC(=O)C                              |
| ZINC08439447 | 4.75  | 2.44              | -31.34           | 1        | 11          | 0      | 537.569         | 12             | CC1=NC(=C)C(C@@H)(C@H)1C(=O)OCCOC2ccc(cc2)N+([=O])O-])C(=O)OCCOC3ccc(cc3)NC(=O)C                           |
| ZINC08439447 | 4.57  | 1.05              | -26.04           | 1        | 11          | 0      | 537.569         | 12             | CC1=NC(=C)C(C@@H)(C@H)1C(=O)OCCOC2ccc(cc2)N+([=O])O-])C(=O)OCCOC3ccc(cc3)NC(=O)C                           |
| ZINC02170611 | 6.03  | 5.29              | -8.25            | 1        | 2           | 0      | 423.356         | 6              | c1ccc(cc1)C(c2cccc2)NC(=O)C3ccc(cc3)C(F)(F)F(F)F                                                           |
| ZINC08439446 | 6.12  | 13.49             | -24.22           | 1        | 6           | 0      | 475.585         | 9              | COc1cccc(c1)[C@H]2C3=C(C)C(C3=O)C(C)NC(=C2C(=O)OCCOC4cccc4)C                                               |
| ZINC08439446 | 6.24  | -0.01             | -11.24           | 0        | 6           | 0      | 475.585         | 9              | COc1cccc(c1)[C@H]2C3C(=O)CC(C=C3N=C(C2C(=O)OCCOC4cccc4)C)C(C)C                                             |
| ZINC08439445 | 4.57  | 1.11              | -20.9            | 1        | 11          | 0      | 537.569         | 12             | CC1=NC(=C)C(C@@H)(C1C(=O)OCCOC2ccc(cc2)NC(=O)C3cccc3N+([=O])O-])C(=O)OCCOC3ccc(cc3)NC(=O)C                 |
| ZINC08439445 | 4.75  | 1.14              | -20.51           | 1        | 11          | 0      | 537.569         | 12             | CC1=NC(=C)C(C@@H)(C1C(=O)OCCOC2ccc(cc2)N+([=O])O-])C(=O)OCCOC3ccc(cc3)NC(=O)C                              |
| ZINC08439445 | 4.75  | 2.26              | -20              | 1        | 11          | 0      | 537.569         | 12             | CC1=NC(=C)C(C@@H)(C@@H)1C(=O)OCCOC2ccc(cc2)N+([=O])O-])C(=O)OCCOC3ccc(cc3)NC(=O)C                          |
| ZINC08439445 | 4.57  | 0.92              | -21.04           | 1        | 11          | 0      | 537.569         | 12             | CC1=NC(=C)C(C@@H)(C@H)1C(=O)OCCOC2ccc(cc2)N+([=O])O-])C(=O)OCCOC3ccc(cc3)NC(=O)C                           |
| ZINC08439444 | 5.98  | -1.34             | -12.33           | 2        | 4           | 0      | 455.023         | 5              | CS1ccc(c1)C(=O)Nc2ccc(cc2)NC(=O)C3C4C5CC(C3)C(C5)4                                                         |
| ZINC08439443 | 5.14  | -0.49             | -28.89           | 2        | 14          | 0      | 672.691         | 16             | CC1=NC(=C)C(C@@H)(C1C(=O)OCCOC2ccc(cc2)NC(=O)C3cccc3N+([=O])O-])C(=O)OCCOC4ccc(cc4)NC(=O)C                 |
| ZINC08439443 | 5.32  | -0.49             | -28.31           | 2        | 14          | 0      | 672.691         | 16             | CC1=NC(=C)C(C@@H)(C1C(=O)OCCOC2ccc(cc2)NC(=O)C3cccc3N+([=O])O-])C(=O)OCCOC4ccc(cc4)NC(=O)C                 |
| ZINC08439443 | 5.32  | 1.02              | -35.44           | 2        | 14          | 0      | 672.691         | 16             | CC1=NC(=C)C(C@@H)(C@@H)1C(=O)OCCOC2ccc(cc2)NC(=O)C3cccc3N+([=O])O-])C(=O)OCCOC4ccc(cc4)NC(=O)C             |
| ZINC08439443 | 5.14  | -0.61             | -28.86           | 2        | 14          | 0      | 672.691         | 16             | CC1=NC(=C)C(C@@H)(C@@H)1C(=O)OCCOC2ccc(cc2)NC(=O)C3cccc3N+([=O])O-])C(=O)OCCOC4ccc(cc4)NC(=O)C             |
| ZINC08439442 | 6.12  | 13.31             | -23.47           | 1        | 6           | 0      | 475.585         | 9              | COc1cccc(c1)[C@H]2C3=C(C)C(C3=O)C(C)NC(=C2C(=O)OCCOC4cccc4)C                                               |
| ZINC08439442 | 6.24  | -0.03             | -10.89           | 0        | 6           | 0      | 475.585         | 9              | COc1cccc(c1)[C@@H]2C3C(=O)CC(C=C3N=C(C2C(=O)OCCOC4cccc4)C)C(C)C                                            |
| ZINC02170573 | 5.53  | 0.51              | -13.7            | 1        | 6           | 0      | 476.96          | 8              | Cc1c(c2ccc(cc2)N1C(=O)C3ccc(cc3)C)OC(C)C(=O)NCCOC4cccc4                                                    |
| ZINC08439441 | 3.74  | 1.81              | -54.5            | 1        | 12          | 1      | 539.565         | 10             | CC1=NC(=C)C(C@@H)(C1C(=O)OCCOC2ccc(cc2)N+([=O])O-])C(=O)OCCOC3ccc(cc3)N+([=O])O-])C(=O)OCCOC4ccc(cc4)C     |
| ZINC08439441 | 3.92  | 1.91              | -59.17           | 1        | 12          | 1      | 539.565         | 10             | CC1=NC(=C)C(C@@H)(C1C(=O)OCCOC2ccc(cc2)N+([=O])O-])C(=O)OCCOC3ccc(cc3)N+([=O])O-])C(=O)OCCOC4ccc(cc4)C     |
| ZINC08439441 | 3.92  | 3.06              | -54.41           | 1        | 12          | 1      | 539.565         | 10             | CC1=NC(=C)C(C@@H)(C@@H)1C(=O)OCCOC2ccc(cc2)N+([=O])O-])C(=O)OCCOC3ccc(cc3)N+([=O])O-])C(=O)OCCOC4ccc(cc4)C |
| ZINC08439441 | 3.74  | 1.8               | -59.83           | 1        | 12          | 1      | 539.565         | 10             | CC1=NC(=C)C(C@@H)(C@@H)1C(=O)OCCOC2ccc(cc2)N+([=O])O-])C(=O)OCCOC3ccc(cc3)N+([=O])O-])C(=O)OCCOC4ccc(cc4)C |
| ZINC02170558 | 6.02  | 2.36              | -10.11           | 0        | 3           | 0      | 428.891         | 5              | c1ccc(cc1)Cn2c(=O)c3cccc3nc2Sc4cc4c(c4)F                                                                   |
| ZINC08439440 | 4.13  | 0.13              | -23.08           | 1        | 12          | 0      | 553.568         | 14             | CC1=NC(=C)C(C@@H)(C1C(=O)OCCOC2ccc(cc2)N+([=O])O-])C(=O)OCCOC3ccc(cc3)NC(=O)C                              |
| ZINC08439440 | 4.31  | 0.21              | -21.5            | 1        | 12          | 0      | 553.568         | 14             | CC1=NC(=C)C(C@@H)(C1C(=O)OCCOC2ccc(cc2)NC(=O)C3cccc3N+([=O])O-])C(=O)OCCOC                                 |
| ZINC08439440 | 4.31  | 1.42              | -25.79           | 1        | 12          | 0      | 553.568         | 14             | CC1=NC(=C)C(C@@H)(C@@H)1C(=O)OCCOC2ccc(cc2)NC(=O)C3cccc3N+([=O])O-])C(=O)OCCOC                             |
| ZINC08439440 | 4.13  | 0.13              | -22.45           | 1        | 12          | 0      | 553.568         | 14             | CC1=NC(=C)C(C@@H)(C@H)1C(=O)OCCOC2ccc(cc2)NC(=O)C3cccc3N+([=O])O-])C(=O)OCCOC                              |
| ZINC08439439 | 5.8   | -0.58             | -11.11           | 0        | 5           | 0      | 482.374         | 7              | CC1=NC2=C(C)C(C@@H)(C1C(=O)OCCOC3cccc3)C4cccc4Br)C(=O)OCC2                                                 |
| ZINC08439439 | 5.98  | -0.37             | -11.72           | 0        | 5           | 0      | 482.374         | 7              | C=C1C(C@@H)(C2C(=N1)C)C3ccc(cc3)Br)C(=O)OCCOC4cccc4                                                        |
| ZINC08439439 | 5.98  | 0.63              | -11.69           | 0        | 5           | 0      | 482.374         | 7              | C=C1C(C@@H)(C@H)2C(=N1)C)C3ccc(cc3)Br)C(=O)OCCOC4cccc4                                                     |
| ZINC08439439 | 5.8   | -0.49             | -14.08           | 0        | 5           | 0      | 482.374         | 7              | CC1=NC(=C)C(C@@H)(C@H)2C(=N1)C)C3ccc(cc3)Br)C(=O)OCCOC4cccc4                                               |
| ZINC08439438 | 4.13  | 0.33              | -20.44           | 1        | 12          | 0      | 553.568         | 14             | CC1=NC(=C)C(C@@H)(C1C(=O)OCCOC2ccc(cc2)N+([=O])O-])C(=O)OCCOC3ccc(cc3)NC(=O)C                              |
| ZINC08439438 | 4.31  | 0.4               | -20.28           | 1        | 12          | 0      | 553.568         | 14             | CC1=NC(=C)C(C@@H)(C1C(=O)OCCOC2ccc(cc2)NC(=O)C3cccc3N+([=O])O-])C(=O)OCCOC                                 |
| ZINC08439438 | 4.31  | 1.85              | -32.79           | 1        | 12          | 0      | 553.568         | 14             | CC1=NC(=C)C(C@@H)(C@@H)1C(=O)OCCOC2ccc(cc2)NC(=O)C3cccc3N+([=O])O-])C(=O)OCCOC                             |
| ZINC08439438 | 4.13  | 0.16              | -20.74           | 1        | 12          | 0      | 553.568         | 14             | CC1=NC(=C)C(C@@H)(C@H)1C(=O)OCCOC2ccc(cc2)NC(=O)C3cccc3N+([=O])O-])C(=O)OCCOC                              |
| ZINC08439437 | 4.53  | -1.06             | -21.73           | 2        | 6           | 0      | 496.654         | 12             | COc1cccc1NC(=O)CSc2ccc(cc2)CSCC(=O)Nc3cccc3OC                                                              |
| ZINC08439436 | 3.63  | 0.02              | -22.83           | 1        | 12          | 0      | 553.568         | 14             | CC1=NC(=C)C(C@@H)(C1C(=O)OCCOC2ccc(cc2)N+([=O])O-])C(=O)OCCOC3ccc(cc3)NC(=O)C                              |
| ZINC08439436 | 3.81  | 0.2               | -23.06           | 1        | 12          | 0      | 553.568         | 14             | CC1=NC(=C)C(C@@H)(C1C(=O)OCCOC2ccc(cc2)NC(=O)C3cccc3N+([=O])O-])C(=O)OCCOC                                 |
| ZINC08439436 | 3.81  | 1.46              | -31.45           | 1        | 12          | 0      | 553.568         | 14             | CC1=NC(=C)C(C@@H)(C@H)1C(=O)OCCOC2ccc(cc2)NC(=O)C3cccc3N+([=O])O-])C(=O)OCCOC                              |



Supplementary Table S2:

Detailed table of XP Docking using Schrodinger's Glide module

| ZINC_ID      | sLogP | ApolarDesolvation | PolarDesolvation | H Donors | H Acceptors | Charge | MolecularWeight | RotatableBonds | SMILES                                                                          |
|--------------|-------|-------------------|------------------|----------|-------------|--------|-----------------|----------------|---------------------------------------------------------------------------------|
| ZINC08439436 | 3.63  | 0.23              | -23.7            | 1        | 12          | 0      | 553.568         | 14             | CC1=NC(C([C@H]([C@@H]1C(=O)OCCO2ccc(cc2)NC(=O)C)3cccc3N+([=O])O-)[C(=O)OCCOC]C  |
| ZINC00643290 | 5.12  | 0.1               | -12.86           | 1        | 6           | 0      | 459.571         | 8              | CC(C)O1cccc1NC(=O)[C@H]2c3cccc3c(=O)n2Cc4cccc4                                  |
| ZINC08439435 | 3.63  | 0.41              | -19.25           | 1        | 12          | 0      | 553.568         | 14             | CC1=NC(C([C@H]([C@@H]1C(=O)OCCO2ccc(cc2)N+([=O])O-))C(=O)OCCO2ccc(cc3)NC(=O)C)C |
| ZINC08439435 | 3.81  | 0.47              | -19.39           | 1        | 12          | 0      | 553.568         | 14             | CC1=NC(C([C@H]([C@@H]1C(=O)OCCO2ccc(cc2)NC(=O)C)3cccc3N+([=O])O-))C(=O)OCCOC    |
| ZINC08439435 | 3.81  | 1.64              | -20              | 1        | 12          | 0      | 553.568         | 14             | CC1=NC(C([C@H]([C@@H]1C(=O)OCCO2ccc(cc2)NC(=O)C)3cccc3N+([=O])O-))C(=O)OCCOC    |
| ZINC08439435 | 3.63  | 0.34              | -19.55           | 1        | 12          | 0      | 553.568         | 14             | CC1=NC(C([C@H]([C@@H]1C(=O)OCCO2ccc(cc2)NC(=O)C)3cccc3N+([=O])O-))C(=O)OCCOC    |
| ZINC00643280 | 4.08  | -2.87             | -11.83           | 3        | 6           | 0      | 412.277         | 5              | c1ccc(c1)NC(=O)CS2nnc(n2N)c3ccc(cc3C)C)F                                        |
| ZINC08439434 | 3.48  | -0.44             | -18.42           | 1        | 11          | 0      | 494.504         | 11             | CCOC(=O)C1[C@@H]([C@@H]1C(=O)OCCO2ccc(cc2)3cccc(c3)N+([=O])O-)                  |
| ZINC08439434 | 3.48  | -0.68             | -19.61           | 1        | 11          | 0      | 494.504         | 11             | CCOC(=O)C1=C(N=C(C([C@H]1c2cccc(c2)N+([=O])O-))C(=O)OCCO2ccc(cc3)C)C            |
| ZINC08439434 | 3.66  | -1.57             | -18.39           | 1        | 11          | 0      | 494.504         | 11             | CCOC(=O)C1[C@@H]([C@@H]1C(=O)OCCO2ccc(cc2)3cccc(c3)N+([=O])O-)                  |
| ZINC08439433 | 5.8   | -0.59             | -9.64            | 0        | 5           | 0      | 482.374         | 7              | CC1=NC2=C([C@H]([C@@H]1C(=O)OCCO2ccc(cc2)3cccc(c4)Br)C(=O)OCC2                  |
| ZINC08439433 | 5.98  | -0.46             | -10.69           | 0        | 5           | 0      | 482.374         | 7              | C=C1C([C@@H]([C@@H]1C(=O)OCCO2ccc(cc2)3cccc(c3)Br)C(=O)OCCO2ccc(cc4)C           |
| ZINC08439433 | 5.98  | 0.78              | -11.46           | 0        | 5           | 0      | 482.374         | 7              | C=C1C([C@@H]([C@@H]1C(=O)OCCO2ccc(cc2)3cccc(c3)Br)C(=O)OCCO2ccc(cc4)C           |
| ZINC08439433 | 5.8   | -0.59             | -13.35           | 0        | 5           | 0      | 482.374         | 7              | CC1=NC2=C([C@H]([C@@H]1C(=O)OCCO2ccc(cc2)3cccc(c3)Br)C(=O)OCCO2ccc(cc4)C        |
| ZINC08439432 | 3.48  | -0.4              | -11.86           | 1        | 11          | 0      | 494.504         | 11             | CCOC(=O)C1[C@@H]([C@@H]1C(=O)OCCO2ccc(cc2)3cccc(c3)N+([=O])O-)                  |
| ZINC08439432 | 3.48  | -0.64             | -13.63           | 1        | 11          | 0      | 494.504         | 11             | CCOC(=O)C1=C(N=C(C([C@H]1c2cccc(c2)N+([=O])O-))C(=O)OCCO2ccc(cc3)C)C            |
| ZINC08439431 | 4.79  | 1.8               | -8.7             | 0        | 8           | 0      | 434.514         | 10             | CC1=NC(C([C@H]([C@@H]1C(=O)OCCO2ccc(cc2)N+([=O])O-))C(=O)OCCO2ccc(cc3)C)C       |
| ZINC08439431 | 4.97  | 1.85              | -8.37            | 0        | 8           | 0      | 434.514         | 10             | CC1=NC(C([C@H]([C@@H]1C(=O)OCCO2ccc(cc2)N+([=O])O-))C(=O)OCCO2ccc(cc3)C)C       |
| ZINC08439431 | 4.97  | 3.41              | -17.34           | 0        | 8           | 0      | 434.514         | 10             | CC1=NC(C([C@H]([C@@H]1C(=O)OCCO2ccc(cc2)N+([=O])O-))C(=O)OCCO2ccc(cc3)C)C       |
| ZINC08439431 | 4.79  | 1.93              | -8.53            | 0        | 8           | 0      | 434.514         | 10             | CC1=NC(C([C@H]([C@@H]1C(=O)OCCO2ccc(cc2)N+([=O])O-))C(=O)OCCO2ccc(cc3)C)C       |
| ZINC02170530 | 5.46  | -3.49             | -14.48           | 3        | 7           | 0      | 466.394         | 9              | CC1CCO1ccc1NC(=O)CS2nnc(n2N)c3ccc(cc3C)C)C                                      |
| ZINC08439430 | 4.79  | 2.01              | -14.66           | 0        | 8           | 0      | 434.514         | 10             | CC1=NC(C([C@H]([C@@H]1C(=O)OCCO2ccc(cc2)N+([=O])O-))C(=O)OCCO2ccc(cc3)C)C       |
| ZINC08439430 | 4.97  | 3.14              | -13.74           | 0        | 8           | 0      | 434.514         | 10             | CC1=NC(C([C@H]([C@@H]1C(=O)OCCO2ccc(cc2)N+([=O])O-))C(=O)OCCO2ccc(cc3)C)C       |
| ZINC08439429 | 6.03  | 1.99              | -8.6             | 0        | 4           | 0      | 433.523         | 6              | CC1=NC2=C([C@H]([C@@H]1C(=O)OCCO2ccc(cc2)3cccc(c3)F)C(=O)OCC2)C)C               |
| ZINC08439429 | 6.21  | 2.47              | -9.89            | 0        | 4           | 0      | 433.523         | 6              | CC1(C2=NC=C)C([C@H]([C@@H]1C(=O)OCCO2ccc(cc2)3cccc(c3)F)C(=O)OCC2)C)C           |
| ZINC08439429 | 6.21  | 3.41              | -9.25            | 0        | 4           | 0      | 433.523         | 6              | CC1(C2=NC=C)C([C@H]([C@@H]1C(=O)OCCO2ccc(cc2)3cccc(c3)F)C(=O)OCC2)C)C           |
| ZINC08439429 | 6.03  | 2.52              | -11.45           | 0        | 4           | 0      | 433.523         | 6              | CC1=C([C@H]([C@@H]1C(=O)OCCO2ccc(cc2)3cccc(c3)F)C(=O)OCC2)C)C                   |
| ZINC08439428 | 4.54  | 1.08              | -12.06           | 0        | 9           | 0      | 442.468         | 10             | CC1=NC(C([C@H]([C@@H]1C(=O)OCCO2ccc(cc2)N+([=O])O-))C(=O)OCCO2ccc(cc3)C)C       |
| ZINC08439428 | 4.72  | 1.18              | -10.56           | 0        | 9           | 0      | 442.468         | 10             | CC1=NC(C([C@H]([C@@H]1C(=O)OCCO2ccc(cc2)N+([=O])O-))C(=O)OCCO2ccc(cc3)C)C       |
| ZINC08439428 | 4.54  | 1.13              | -11.85           | 0        | 9           | 0      | 442.468         | 10             | CC1=NC(C([C@H]([C@@H]1C(=O)OCCO2ccc(cc2)N+([=O])O-))C(=O)OCCO2ccc(cc3)C)C       |
| ZINC08439426 | 4.54  | 1.1               | -10.55           | 0        | 9           | 0      | 442.468         | 10             | CC1=NC(C([C@H]([C@@H]1C(=O)OCCO2ccc(cc2)N+([=O])O-))C(=O)OCCO2ccc(cc3)C)C       |
| ZINC08439426 | 4.72  | 1.18              | -9.76            | 0        | 9           | 0      | 442.468         | 10             | CC1=NC(C([C@H]([C@@H]1C(=O)OCCO2ccc(cc2)N+([=O])O-))C(=O)OCCO2ccc(cc3)C)C       |
| ZINC08439426 | 4.72  | 2.61              | -16.59           | 0        | 9           | 0      | 442.468         | 10             | CC1=NC(C([C@H]([C@@H]1C(=O)OCCO2ccc(cc2)N+([=O])O-))C(=O)OCCO2ccc(cc3)C)C       |
| ZINC08439426 | 4.54  | 1.06              | -10.18           | 0        | 9           | 0      | 442.468         | 10             | CC1=NC(C([C@H]([C@@H]1C(=O)OCCO2ccc(cc2)N+([=O])O-))C(=O)OCCO2ccc(cc3)C)C       |
| ZINC08439424 | 6.03  | 2.19              | -12.99           | 0        | 4           | 0      | 433.523         | 6              | CC1=NC2=C([C@H]([C@@H]1C(=O)OCCO2ccc(cc2)3cccc(c3)F)C(=O)OCC2)C)C               |
| ZINC08439424 | 6.21  | 2.22              | -11.73           | 0        | 4           | 0      | 433.523         | 6              | CC1(C2=NC=C)C([C@H]([C@@H]1C(=O)OCCO2ccc(cc2)3cccc(c3)F)C(=O)OCC2)C)C           |
| ZINC08439424 | 6.21  | 3.44              | -13.72           | 0        | 4           | 0      | 433.523         | 6              | CC1(C2=NC=C)C([C@H]([C@@H]1C(=O)OCCO2ccc(cc2)3cccc(c3)F)C(=O)OCC2)C)C           |
| ZINC08439424 | 6.03  | 1.97              | -13.58           | 0        | 4           | 0      | 433.523         | 6              | CC1=C([C@H]([C@@H]1C(=O)OCCO2ccc(cc2)3cccc(c3)F)C(=O)OCC2)C)C                   |
| ZINC00717017 | 6.15  | 0.71              | -10              | 0        | 5           | 0      | 471.578         | 6              | CC1=NC2=C([C@H]([C@@H]1C(=O)OCCO2ccc(cc2)3cccc(c3)O4cccc4)C(=O)OCC2)C)C         |
| ZINC00717017 | 6.33  | 0.77              | -10.43           | 0        | 5           | 0      | 471.578         | 6              | CCOC(=O)C1[C@@H]([C@@H]1C(=O)OCCO2ccc(cc2)3cccc(c3)O4cccc4)C(=O)OCC2)C)C        |
| ZINC00717017 | 6.33  | 2.1               | -12.01           | 0        | 5           | 0      | 471.578         | 6              | CCOC(=O)C1[C@@H]([C@@H]1C(=O)OCCO2ccc(cc2)3cccc(c3)O4cccc4)C(=O)OCC2)C)C        |
| ZINC00717017 | 6.15  | 0.65              | -12.49           | 0        | 5           | 0      | 471.578         | 6              | CC1=C([C@H]([C@@H]1C(=O)OCCO2ccc(cc2)3cccc(c3)O4cccc4)C(=O)OCC2)C)C             |
| ZINC08439423 | 4.54  | 1.11              | -10.03           | 0        | 9           | 0      | 442.468         | 10             | CC1=NC(C([C@H]([C@@H]1C(=O)OCCO2ccc(cc2)N+([=O])O-))C(=O)OCCO2ccc(cc3)C)C       |
| ZINC08439423 | 4.72  | 1.22              | -9.56            | 0        | 9           | 0      | 442.468         | 10             | CC1=NC(C([C@H]([C@@H]1C(=O)OCCO2ccc(cc2)N+([=O])O-))C(=O)OCCO2ccc(cc3)C)C       |
| ZINC08439423 | 4.72  | 2.61              | -19.14           | 0        | 9           | 0      | 442.468         | 10             | CC1=NC(C([C@H]([C@@H]1C(=O)OCCO2ccc(cc2)N+([=O])O-))C(=O)OCCO2ccc(cc3)C)C       |
| ZINC08439423 | 4.54  | 1.1               | -9.93            | 0        | 9           | 0      | 442.468         | 10             | CC1=NC(C([C@H]([C@@H]1C(=O)OCCO2ccc(cc2)N+([=O])O-))C(=O)OCCO2ccc(cc3)C)C       |
| ZINC00717018 | 6.15  | 0.6               | -10.29           | 0        | 5           | 0      | 471.578         | 6              | CC1=NC2=C([C@H]([C@@H]1C(=O)OCCO2ccc(cc2)3cccc(c3)O4cccc4)C(=O)OCC2)C)C         |
| ZINC00717018 | 6.33  | 0.7               | -10.07           | 0        | 5           | 0      | 471.578         | 6              | CCOC(=O)C1[C@@H]([C@@H]1C(=O)OCCO2ccc(cc2)3cccc(c3)O4cccc4)C(=O)OCC2)C)C        |
| ZINC00717018 | 6.33  | 2.01              | -19.03           | 0        | 5           | 0      | 471.578         | 6              | CCOC(=O)C1[C@@H]([C@@H]1C(=O)OCCO2ccc(cc2)3cccc(c3)O4cccc4)C(=O)OCC2)C)C        |
| ZINC00717018 | 6.15  | 0.74              | -12.06           | 0        | 5           | 0      | 471.578         | 6              | CC1=C([C@H]([C@@H]1C(=O)OCCO2ccc(cc2)3cccc(c3)O4cccc4)C(=O)OCC2)C)C             |
| ZINC00717019 | 6.15  | 0.72              | -9.58            | 0        | 5           | 0      | 471.578         | 6              | CC1=NC2=C([C@H]([C@@H]1C(=O)OCCO2ccc(cc2)3cccc(c3)O4cccc4)C(=O)OCC2)C)C         |
| ZINC00717019 | 6.33  | 0.85              | -10.11           | 0        | 5           | 0      | 471.578         | 6              | CCOC(=O)C1[C@@H]([C@@H]1C(=O)OCCO2ccc(cc2)3cccc(c3)O4cccc4)C(=O)OCC2)C)C        |
| ZINC00717019 | 6.33  | 2.11              | -11.73           | 0        | 5           | 0      | 471.578         | 6              | CCOC(=O)C1[C@@H]([C@@H]1C(=O)OCCO2ccc(cc2)3cccc(c3)O4cccc4)C(=O)OCC2)C)C        |
| ZINC00717019 | 6.15  | 0.73              | -12.31           | 0        | 5           | 0      | 471.578         | 6              | CC1=C([C@H]([C@@H]1C(=O)OCCO2ccc(cc2)3cccc(c3)O4cccc4)C(=O)OCC2)C)C             |
| ZINC00717020 | 6.15  | 0.7               | -9.76            | 0        | 5           | 0      | 471.578         | 6              | CC1=NC2=C([C@H]([C@@H]1C(=O)OCCO2ccc(cc2)3cccc(c3)O4cccc4)C(=O)OCC2)C)C         |
| ZINC00717020 | 6.33  | -10.03            | 0                | 5        | 0           | 0      | 471.578         | 6              | CCOC(=O)C1[C@@H]([C@@H]1C(=O)OCCO2ccc(cc2)3cccc(c3)O4cccc4)C(=O)OCC2)C)C        |
| ZINC00717020 | 6.33  | 1.93              | -12.42           | 0        | 5           | 0      | 471.578         | 6              | CCOC(=O)C1[C@@H]([C@@H]1C(=O)OCCO2ccc(cc2)3cccc(c3)O4cccc4)C(=O)OCC2)C)C        |
| ZINC00717020 | 6.15  | 0.65              | -11.82           | 0        | 5           | 0      | 471.578         | 6              | CC1=C([C@H]([C@@H]1C(=O)OCCO2ccc(cc2)3cccc(c3)O4cccc4)C(=O)OCC2)C)C             |
| ZINC08439421 | 4.54  | 1.02              | -9.63            | 0        | 9           | 0      | 442.468         | 10             | CC1=NC(C([C@H]([C@@H]1C(=O)OCCO2ccc(cc2)N+([=O])O-))C(=O)OCCO2ccc(cc3)C)C       |
| ZINC08439421 | 4.72  | 1.05              | -9.15            | 0        | 9           | 0      | 442.468         | 10             | CC1=NC(C([C@H]([C@@H]1C(=O)OCCO2ccc(cc2)N+([=O])O-))C(=O)OCCO2ccc(cc3)C)C       |
| ZINC08439421 | 4.72  | 2.21              | -9.96            | 0        | 9           | 0      | 442.468         | 10             | CC1=NC(C([C@H]([C@@H]1C(=O)OCCO2ccc(cc2)N+([=O])O-))C(=O)OCCO2ccc(cc3)C)C       |

Supplementary Table S2:

Detailed table of XP Docking using Schrodinger's Glide module

| ZINC_ID      | xLogP | ApolarDesolvation | PolarDesolvation | H Donors | H Acceptors | Charge | MolecularWeight | RotatableBonds | SMILES                                                                                           |
|--------------|-------|-------------------|------------------|----------|-------------|--------|-----------------|----------------|--------------------------------------------------------------------------------------------------|
| ZINC08439421 | 4.54  | 1.1               | -9.73            | 0        | 9           | 0      | 442.468         | 10             | CC1=NC(C([C@@H]([C@H]1C(=O)OC[C@@H]2CCC(=O)C3CCCC(=O)N+([=O])O-])C(=O)OCC=C)C                    |
| ZINC08439419 | 4.33  | 1                 | -21.17           | 1        | 11          | 0      | 509.515         | 11             | CC1=NC(C([C@@H]([C@H]1C(=O)OC)C2CCCC(=O)N+([=O])O-])C(=O)OCC(=O)C3CCCC(=O)N+([=O])O-])C(=O)OCC=C |
| ZINC08439419 | 4.51  | 0.92              | -19.52           | 1        | 11          | 0      | 509.515         | 11             | CC1=NC(C([C@@H]([C@H]1C(=O)OC)C2CCCC(=O)N+([=O])O-])C(=O)OCC(=O)C3CCCC(=O)N+([=O])O-])C(=O)OCC=C |
| ZINC08439419 | 4.51  | 2.32              | -23.43           | 1        | 11          | 0      | 509.515         | 11             | CC1=NC(C([C@@H]([C@H]1C(=O)OC)C2CCCC(=O)N+([=O])O-])C(=O)OCC(=O)C3CCCC(=O)N+([=O])O-])C(=O)OCC=C |
| ZINC08439419 | 4.33  | 0.87              | -20.21           | 1        | 11          | 0      | 509.515         | 11             | CC1=NC(C([C@@H]([C@H]1C(=O)OC)C2CCCC(=O)N+([=O])O-])C(=O)OCC(=O)C3CCCC(=O)N+([=O])O-])C(=O)OCC=C |
| ZINC08439418 | 4.63  | 11.98             | -29.96           | 1        | 6           | 0      | 435.52          | 4              | Cc1ccc2c(c1)c(=O)c(c2)C[C@H]3C4=C(C(C(C4=O)(C)C)NC(=C3C(=O)O)C(C)C                               |
| ZINC08439418 | 4.74  | 1.06              | -13.6            | 0        | 6           | 0      | 435.52          | 4              | Cc1ccc2c(c1)c(=O)c(c2)C[C@H]3C4=C(C(C(C4=O)(C)C)NC(=C3C(=O)O)C(C)C                               |
| ZINC08439417 | 4.33  | 0.84              | -20.73           | 1        | 11          | 0      | 509.515         | 11             | CC1=NC(C([C@@H]([C@H]1C(=O)OC)C2CCCC(=O)N+([=O])O-])C(=O)OCC(=O)C3CCCC(=O)N+([=O])O-])C(=O)OCC=C |
| ZINC08439417 | 4.51  | 0.94              | -20.52           | 1        | 11          | 0      | 509.515         | 11             | CC1=NC(C([C@@H]([C@H]1C(=O)OC)C2CCCC(=O)N+([=O])O-])C(=O)OCC(=O)C3CCCC(=O)N+([=O])O-])C(=O)OCC=C |
| ZINC08439417 | 4.51  | 2.08              | -22.27           | 1        | 11          | 0      | 509.515         | 11             | CC1=NC(C([C@@H]([C@H]1C(=O)OC)C2CCCC(=O)N+([=O])O-])C(=O)OCC(=O)C3CCCC(=O)N+([=O])O-])C(=O)OCC=C |
| ZINC08439416 | 5.07  | 2.35              | -9.82            | 0        | 8           | 0      | 446.525         | 12             | CCSCCOC(=O)C1C[C@@H]([C@H]1C(=O)OCC(=O)C)C2CCCC(=O)N+([=O])O-])C(=O)OCC=C                        |
| ZINC08439416 | 5.07  | 2.19              | -10.84           | 0        | 8           | 0      | 446.525         | 12             | CCSCCOC(=O)C1C[C@@H]([C@H]1C(=O)OCC(=O)C)C2CCCC(=O)N+([=O])O-])C(=O)OCC=C                        |
| ZINC08439416 | 5.25  | 1.24              | -10.05           | 0        | 8           | 0      | 446.525         | 12             | CCSCCOC(=O)C1C[C@@H]([C@H]1C(=O)OCC(=O)C)C2CCCC(=O)N+([=O])O-])C(=O)OCC=C                        |
| ZINC01013249 | 5.95  | 0.36              | -12.68           | 2        | 6           | 0      | 494.418         | 7              | Cc1ccc(c1)Br)NC(=O)CSc2nnc1n2c3cccc3)Nc4cccc4                                                    |
| ZINC08439415 | 4.63  | 11.98             | -29.8            | 1        | 6           | 0      | 435.52          | 4              | Cc1ccc2c(c1)c(=O)c(c2)C[C@H]3C4=C(C(C(C4=O)(C)C)NC(=C3C(=O)O)C(C)C                               |
| ZINC08439415 | 4.74  | 1.04              | -13.51           | 0        | 6           | 0      | 435.52          | 4              | Cc1ccc2c(c1)c(=O)c(c2)C[C@H]3C4=C(C(C(C4=O)(C)C)NC(=C3C(=O)O)C(C)C                               |
| ZINC08439414 | 5.07  | 2.17              | -8.45            | 0        | 8           | 0      | 446.525         | 12             | CCSCCOC(=O)C1C[C@@H]([C@H]1C(=O)OCC(=O)C)C2CCCC(=O)N+([=O])O-])C(=O)OCC=C                        |
| ZINC08439414 | 5.07  | 2.02              | -8.66            | 0        | 8           | 0      | 446.525         | 12             | CCSCCOC(=O)C1C[C@@H]([C@H]1C(=O)OCC(=O)C)C2CCCC(=O)N+([=O])O-])C(=O)OCC=C                        |
| ZINC08439414 | 5.25  | 0.9               | -8.2             | 0        | 8           | 0      | 446.525         | 12             | CCSCCOC(=O)C1C[C@@H]([C@H]1C(=O)OCC(=O)C)C2CCCC(=O)N+([=O])O-])C(=O)OCC=C                        |
| ZINC02170517 | 5.42  | 0.14              | -14.14           | 1        | 6           | 0      | 490.987         | 9              | Cc1c2ccc(ccc2n1C(=O)C3CCCC(=O)N+([=O])O-])C(=O)OCC=C                                             |
| ZINC08439413 | 4.58  | 1.15              | -11.95           | 0        | 8           | 0      | 466.581         | 12             | CC1=NC(C([C@@H]([C@H]1C(=O)OCC(=O)C)C2CCCC(=O)N+([=O])O-])C(=O)OCC=C                             |
| ZINC08439413 | 4.76  | 1.32              | -10.38           | 0        | 8           | 0      | 466.581         | 12             | CC1=NC(C([C@@H]([C@H]1C(=O)OCC(=O)C)C2CCCC(=O)N+([=O])O-])C(=O)OCC=C                             |
| ZINC08439413 | 4.76  | 2.45              | -12.34           | 0        | 8           | 0      | 466.581         | 12             | CC1=NC(C([C@@H]([C@H]1C(=O)OCC(=O)C)C2CCCC(=O)N+([=O])O-])C(=O)OCC=C                             |
| ZINC08439413 | 4.58  | 1.06              | -10.74           | 0        | 8           | 0      | 466.581         | 12             | CC1=NC(C([C@@H]([C@H]1C(=O)OCC(=O)C)C2CCCC(=O)N+([=O])O-])C(=O)OCC=C                             |
| ZINC08439412 | 5.63  | 13.39             | -21.44           | 1        | 6           | 0      | 475.585         | 9              | CCOC1CCCC1C[C@@H]2C3=C(C(C(C3=O)C)NC(=C2C(=O)O)OCC(=O)C)C                                        |
| ZINC08439412 | 5.74  | -0.48             | -9.94            | 0        | 6           | 0      | 475.585         | 9              | CCOC1CCCC1C[C@@H]2C3=C(C(C(C3=O)C)NC(=C2C(=O)O)OCC(=O)C)C                                        |
| ZINC08439411 | 4.08  | 1.03              | -13.35           | 0        | 8           | 0      | 466.581         | 12             | CC1=NC(C([C@@H]([C@H]1C(=O)OCC(=O)C)C2CCCC(=O)N+([=O])O-])C(=O)OCC=C                             |
| ZINC08439411 | 4.26  | 1.04              | -12.73           | 0        | 8           | 0      | 466.581         | 12             | CC1=NC(C([C@@H]([C@H]1C(=O)OCC(=O)C)C2CCCC(=O)N+([=O])O-])C(=O)OCC=C                             |
| ZINC08439411 | 4.26  | 2.38              | -14.96           | 0        | 8           | 0      | 466.581         | 12             | CC1=NC(C([C@@H]([C@H]1C(=O)OCC(=O)C)C2CCCC(=O)N+([=O])O-])C(=O)OCC=C                             |
| ZINC08439411 | 4.08  | 1.08              | -13.86           | 0        | 8           | 0      | 466.581         | 12             | CC1=NC(C([C@@H]([C@H]1C(=O)OCC(=O)C)C2CCCC(=O)N+([=O])O-])C(=O)OCC=C                             |
| ZINC02170506 | 6.35  | 0.4               | -22.45           | 1        | 6           | 0      | 439.515         | 8              | CCCCOC1ccc(cc1)NC(=O)Cn2c3cccc4c3n2)-c5cccc5C4=O                                                 |
| ZINC00249053 | 2.95  | 2.91              | -11.96           | 1        | 5           | 0      | 299.392         | 5              | COc1ccc(c1)S(=O)(=O)N2CC(CCC2)O                                                                  |
| ZINC08439410 | 4.7   | 1.98              | -8.73            | 0        | 8           | 0      | 432.498         | 11             | CC1=NC(C([C@@H]([C@H]1C(=O)OCC(=O)C)C2CCCC(=O)N+([=O])O-])C(=O)OCC=C                             |
| ZINC08439410 | 4.88  | 2.01              | -8.48            | 0        | 8           | 0      | 432.498         | 11             | CC1=NC(C([C@@H]([C@H]1C(=O)OCC(=O)C)C2CCCC(=O)N+([=O])O-])C(=O)OCC=C                             |
| ZINC08439410 | 4.88  | 3.41              | -16.48           | 0        | 8           | 0      | 432.498         | 11             | CC1=NC(C([C@@H]([C@H]1C(=O)OCC(=O)C)C2CCCC(=O)N+([=O])O-])C(=O)OCC=C                             |
| ZINC08439410 | 4.7   | 2.05              | -8.73            | 0        | 8           | 0      | 432.498         | 11             | CC1=NC(C([C@@H]([C@H]1C(=O)OCC(=O)C)C2CCCC(=O)N+([=O])O-])C(=O)OCC=C                             |
| ZINC02170492 | 6.03  | 0.99              | -15.85           | 0        | 4           | 0      | 478.614         | 7              | c1ccc(cc1)n2c(=O)c3c4c(sc3nc2)CCCC(=O)Sc5ccc(cc5)F)CCCC4                                         |
| ZINC08439409 | 4.7   | 2.07              | -8.61            | 0        | 8           | 0      | 432.498         | 11             | CC1=NC(C([C@@H]([C@H]1C(=O)OCC(=O)C)C2CCCC(=O)N+([=O])O-])C(=O)OCC=C                             |
| ZINC08439409 | 4.88  | 2.08              | -8.41            | 0        | 8           | 0      | 432.498         | 11             | CC1=NC(C([C@@H]([C@H]1C(=O)OCC(=O)C)C2CCCC(=O)N+([=O])O-])C(=O)OCC=C                             |
| ZINC08439409 | 4.7   | 1.96              | -9.05            | 0        | 8           | 0      | 432.498         | 11             | CC1=NC(C([C@@H]([C@H]1C(=O)OCC(=O)C)C2CCCC(=O)N+([=O])O-])C(=O)OCC=C                             |
| ZINC08439408 | 5.63  | 14.13             | -26.4            | 1        | 6           | 0      | 475.585         | 9              | CCOC1CCCC1C[C@@H]2C3=C(C(C(C3=O)C)NC(=C2C(=O)O)OCC(=O)C)C                                        |
| ZINC08439408 | 5.74  | 0.23              | -13.12           | 0        | 6           | 0      | 475.585         | 9              | CCOC1CCCC1C[C@@H]2C3=C(C(C(C3=O)C)NC(=C2C(=O)O)OCC(=O)C)C                                        |
| ZINC0643217  | 4.12  | -0.7              | -16.91           | 1        | 6           | 0      | 437.323         | 5              | Cc1ccc(cc1)OCC(=O)N2C(COCC2)C)NC(=O)C3ccc(c3)C)C                                                 |
| ZINC08439407 | 3.35  | 1.33              | -9.87            | 0        | 9           | 0      | 450.513         | 12             | CC1=NC(C([C@@H]([C@H]1C(=O)OCC(=O)C)C2CCCC(=O)N+([=O])O-])C(=O)OCC=C                             |
| ZINC08439407 | 3.35  | 1.24              | -10.07           | 0        | 9           | 0      | 450.513         | 12             | CC1=NC(C([C@@H]([C@H]1C(=O)OCC(=O)C)C2CCCC(=O)N+([=O])O-])C(=O)OCC=C                             |
| ZINC08439407 | 3.53  | 2.84              | -16.71           | 0        | 9           | 0      | 450.513         | 12             | CC1=NC(C([C@@H]([C@H]1C(=O)OCC(=O)C)C2CCCC(=O)N+([=O])O-])C(=O)OCC=C                             |
| ZINC08439405 | 3.35  | 0.89              | -12.95           | 0        | 9           | 0      | 450.513         | 12             | CC1=NC(C([C@@H]([C@H]1C(=O)OCC(=O)C)C2CCCC(=O)N+([=O])O-])C(=O)OCC=C                             |
| ZINC08439405 | 3.53  | 1.05              | -12.78           | 0        | 9           | 0      | 450.513         | 12             | CC1=NC(C([C@@H]([C@H]1C(=O)OCC(=O)C)C2CCCC(=O)N+([=O])O-])C(=O)OCC=C                             |
| ZINC08439405 | 3.53  | 2.17              | -13.28           | 0        | 9           | 0      | 450.513         | 12             | CC1=NC(C([C@@H]([C@H]1C(=O)OCC(=O)C)C2CCCC(=O)N+([=O])O-])C(=O)OCC=C                             |
| ZINC08439405 | 3.35  | 0.83              | -13.12           | 0        | 9           | 0      | 450.513         | 12             | CC1=NC(C([C@@H]([C@H]1C(=O)OCC(=O)C)C2CCCC(=O)N+([=O])O-])C(=O)OCC=C                             |
| ZINC06321516 | 5.2   | 11.83             | -16.08           | 1        | 5           | 0      | 477.655         | 5              | Cc1ccc(c1)C)NC(=O)CSC2=NC3=C([C@H]([C@H]1C(=O)OCC(=O)C)C2CCCC(=O)N+([=O])O-])C(=O)OCC=C          |
| ZINC06321516 | 4.82  | 12.87             | -16.08           | 1        | 5           | 0      | 477.655         | 5              | Cc1ccc(c1)C)NC(=O)CSC2=NC3=C([C@H]([C@H]1C(=O)OCC(=O)C)C2CCCC(=O)N+([=O])O-])C(=O)OCC=C          |
| ZINC02170483 | 7.35  | 5.14              | -17.24           | 0        | 6           | 0      | 480.516         | 12             | Cc1ccc(cc1)C(=O)OCC(COC(=O)C2CCCC(=O)N+([=O])O-])C(=O)OCC=C                                      |
| ZINC08439404 | 4.09  | 1                 | -15.51           | 0        | 9           | 0      | 478.567         | 13             | CC1=NC(C([C@@H]([C@H]1C(=O)OCC(=O)C)C2CCCC(=O)N+([=O])O-])C(=O)OCC=C                             |
| ZINC08439404 | 4.27  | 2.43              | -24.55           | 0        | 9           | 0      | 478.567         | 13             | CC1=NC(C([C@@H]([C@H]1C(=O)OCC(=O)C)C2CCCC(=O)N+([=O])O-])C(=O)OCC=C                             |
| ZINC08439404 | 4.27  | 1.18              | -15.8            | 0        | 9           | 0      | 478.567         | 13             | CC1=NC(C([C@@H]([C@H]1C(=O)OCC(=O)C)C2CCCC(=O)N+([=O])O-])C(=O)OCC=C                             |
| ZINC08439403 | 4.09  | 11.85             | -9.89            | 0        | 9           | 0      | 478.567         | 13             | CC1=NC(C([C@@H]([C@H]1C(=O)OCC(=O)C)C2CCCC(=O)N+([=O])O-])C(=O)OCC=C                             |
| ZINC08439403 | 4.27  | 11.65             | -9.2             | 0        | 9           | 0      | 478.567         | 13             | CC1=NC(C([C@@H]([C@H]1C(=O)OCC(=O)C)C2CCCC(=O)N+([=O])O-])C(=O)OCC=C                             |
| ZINC08439403 | 4.27  | 12.49             | -19.23           | 0        | 9           | 0      | 478.567         | 13             | CC1=NC(C([C@@H]([C@H]1C(=O)OCC(=O)C)C2CCCC(=O)N+([=O])O-])C(=O)OCC=C                             |
| ZINC08439403 | 4.09  | 11.78             | -9.42            | 0        | 9           | 0      | 478.567         | 13             | CC1=NC(C([C@@H]([C@H]1C(=O)OCC(=O)C)C2CCCC(=O)N+([=O])O-])C(=O)OCC=C                             |



**Supplementary Table S2:  
Detailed table of XP Docking using Schrodinger's Glide module**

| ZINC_ID      | xLogP | ApolarDesolvation | PolarDesolvation | H Donors | H Acceptors | Charge | MolecularWeight | RotatableBonds | SMILES                                                                                 |
|--------------|-------|-------------------|------------------|----------|-------------|--------|-----------------|----------------|----------------------------------------------------------------------------------------|
| ZINC08439366 | 4.77  | -3.91             | -33.84           | 1        | 9           | 0      | 605.709         | 6              | CC1(CC2=C(C(C3=C(O2)CC(C3=O)(C)C)4ccc(cc4)OC[C@@H](CN5C(=O)c6cccc6S5(=O)=O)O)C(=O)C1)C |
| ZINC06147567 | 3.74  | 5.66              | -9.59            | 1        | 3           | 0      | 267.394         | 3              | Cc1ccc(c(c1)C)S(=O)(=O)NC2CCCCC2                                                       |
| ZINC08439365 | 5.56  | 13.48             | -19.98           | 0        | 6           | 0      | 438.52          | 9              | CC1=CC(=O)O[C@@H]2[C@@H]1C=CC(=C2)OCCCCCOC3=C[C@@H]4[C@@H](C=C3)C(=CC(=O)O4)C          |
| ZINC08439364 | 4.97  | 1.2               | -24.23           | 1        | 7           | 0      | 462.509         | 3              | Cc1c(c(=O)n(n1C)c2ccc2)Nc3ccc4c5c3c(=O)c6cccc6-c5ccc(=O)n4C                            |
| ZINC08439362 | 4.23  | -7.16             | -14.18           | 1        | 6           | 0      | 427.913         | 3              | c1ccc(c(c1)N2CCN(CC2)S(=O)(=O)c3ccc4c5c3ccc5C(=O)N4)Cl                                 |
| ZINC08439361 | 5.56  | 13.42             | -19.93           | 0        | 6           | 0      | 438.52          | 9              | CC1=CC(=O)O[C@@H]2[C@@H]1C=CC(=C2)OCCCCCOC3=C[C@@H]4[C@@H](C=C3)C(=CC(=O)O4)C          |
| ZINC08439360 | 4.47  | -5.12             | -14.87           | 1        | 6           | 0      | 461.465         | 4              | c1ccc(cc1)N2CCN(CC2)S(=O)(=O)c3ccc4c5c3ccc5C(=O)N4)C(F)(F)F                            |
| ZINC08439359 | 5.56  | 13.18             | -18.91           | 0        | 6           | 0      | 438.52          | 9              | CC1=CC(=O)O[C@@H]2[C@@H]1C=CC(=C2)OCCCCCOC3=C[C@@H]4[C@@H](C=C3)C(=CC(=O)O4)C          |
| ZINC08439357 | 6.57  | 2.7               | -19.43           | 0        | 6           | 0      | 466.574         | 11             | CC1=CC(=O)O[C@@H]2[C@@H]1C=CC(=C2)OCCCCCOC3=C[C@@H]4[C@@H](C=C3)C(=CC(=O)O4)C          |
| ZINC08439356 | 3.72  | -7.48             | -16.35           | 2        | 7           | 0      | 468.641         | 9              | Cc1cc(c(c1)C)S(=O)(=O)NCCN(CCO)S(=O)(=O)c2c(cc2)C)C                                    |
| ZINC08439355 | 2.25  | -5.33             | -55.51           | 2        | 8           | -1     | 462.507         | 7              | CCN1c2ccc(c3c2c(ccc3)C1=O)S(=O)(=O)N[C@@H](Cc4ccc5cccc5[nH]4)C(=O)O-                   |
| ZINC08439354 | 6.57  | 15.04             | -20.07           | 0        | 6           | 0      | 466.574         | 11             | CC1=CC(=O)O[C@@H]2[C@@H]1C=CC(=C2)OCCCCCOC3=C[C@@H]4[C@@H](C=C3)C(=CC(=O)O4)C          |
| ZINC08439353 | 2.25  | -5.31             | -50.95           | 2        | 8           | -1     | 462.507         | 7              | CCN1c2ccc(c3c2c(ccc3)C1=O)S(=O)(=O)N[C@@H](Cc4ccc5cccc5[nH]4)C(=O)O-                   |
| ZINC08439351 | 6.57  | 14.98             | -19.99           | 0        | 6           | 0      | 466.574         | 11             | CC1=CC(=O)O[C@@H]2[C@@H]1C=CC(=C2)OCCCCCOC3=C[C@@H]4[C@@H](C=C3)C(=CC(=O)O4)C          |
| ZINC08439350 | 6.51  | -3.23             | -12.29           | 2        | 5           | 0      | 467.612         | 7              | CC(C)(C)lccc(cc1)S(=O)(=O)Nc2cc(c(c3c2ccc3)O)Sc4ccc4                                   |
| ZINC08439349 | 6.57  | 14.75             | -18.96           | 0        | 6           | 0      | 466.574         | 11             | CC1=CC(=O)O[C@@H]2[C@@H]1C=CC(=C2)OCCCCCOC3=C[C@@H]4[C@@H](C=C3)C(=CC(=O)O4)C          |
| ZINC08439348 | 4.63  | -3.91             | -19.23           | 2        | 8           | 0      | 475.555         | 6              | c1ccc(cc1)n2c(ccn2)Sc3cc(c4ccc4c3)NS(=O)(=O)c5ccc5                                     |
| ZINC08439347 | 8.08  | 0.95              | -5.3             | 0        | 2           | 0      | 440.722         | 5              | CC(C)Sc1c2c(cc(n1)c3cc4c(c(n3)SC(C)C)CCCC4)CCCC2                                       |
| ZINC08439345 | 9     | 16.07             | -7.73            | 1        | 3           | 0      | 436.599         | 9              | CCCC1ccc(cc1)NC2=C/C(C=N/c3ccc(cc3)C)C/C)C4CCCC4C2=O                                   |
| ZINC08439345 | 9     | 16.59             | -7.72            | 1        | 3           | 0      | 436.599         | 9              | CCCCc1ccc(cc1)NC2=C/C(C=N/c3ccc(cc3)C)C/C)C4CCCC4C2=O                                  |
| ZINC08439344 | 3.41  | -0.99             | -12.17           | 0        | 6           | 0      | 491.157         | 5              | CC(=O)N(c1ccc(cc1)OC(=O)C)S(=O)(=O)c2cc(ccc2)Br                                        |
| ZINC08439343 | 4.63  | 0.01              | -8.88            | 0        | 5           | 0      | 434.33          | 6              | CCCC(=O)C1[C@@H](C2=C(C)C)C2=O)N=C1C3ccc(cc3)OC                                        |
| ZINC08439343 | 4.63  | -0.35             | -12.83           | 0        | 5           | 0      | 434.33          | 6              | CCCC(=O)C1=C(N=C2CCCC(=O)C2)C@H1c3ccc(cc3)OC                                           |
| ZINC08439342 | 3.14  | -1.54             | -61.29           | 1        | 7           | -1     | 448.473         | 8              | CC(=O)Oc1c2ccc2c(c1)SCC(=O)O-]NS(=O)(=O)c3ccc(cc3)F                                    |
| ZINC08439341 | 4.63  | 0.01              | -8.73            | 0        | 5           | 0      | 434.33          | 6              | CCCC(=O)C1[C@@H](C2=C(C)C)C2=O)N=C1C3ccc(cc3)OC                                        |
| ZINC08439341 | 4.63  | -0.27             | -12.28           | 0        | 5           | 0      | 434.33          | 6              | CCCC(=O)C1=C(N=C2CCCC(=O)C2)C@H1c3ccc(cc3)OC                                           |
| ZINC08439340 | 3.85  | -7.23             | -52.11           | 2        | 6           | -1     | 450.084         | 4              | C1cc(ccc1)S(=O)(=O)Nc2cc(c(c3c2ccc3)O)Sc4ccc4                                          |
| ZINC08439339 | 5.46  | -1.4              | -56.85           | 1        | 8           | -1     | 480.518         | 9              | CCCCc1c2cc(c3ccc3c2o1)NS(=O)(=O)c4ccc(cc4)C(=O)O-                                      |
| ZINC08439338 | 3.8   | -2.25             | -60.09           | 1        | 9           | -1     | 482.49          | 9              | Cc1c(c2cc(c3ccc3c2o1)NS(=O)(=O)c4ccc(cc4)C(=O)O-)C(=O)OCC                              |
| ZINC08439336 | 5.98  | -2.24             | -52.23           | 1        | 6           | -1     | 440.541         | 6              | CC(C)(C)[C@@H]1CCc2c(c3cc(ccc3o2)NS(=O)(=O)c4ccc(cc4)C(=O)O-)C1                        |
| ZINC0622385  | 5.17  | -1.66             | -10.61           | 2        | 5           | 0      | 489.309         | 7              | CCOc1cc(ccc1OCc2ccc2)C(=O)Nc3ccc(cc3)O                                                 |
| ZINC08439335 | 5.98  | -2.26             | -52.56           | 1        | 6           | -1     | 440.541         | 6              | CC(C)(C)[C@@H]1CCc2c(c3cc(ccc3o2)NS(=O)(=O)c4ccc(cc4)C(=O)O-)C1                        |
| ZINC0622382  | 4.78  | -1.67             | -12.08           | 2        | 5           | 0      | 475.282         | 6              | CCOc1cc(ccc1OCc2ccc2)C(=O)Nc3ccc(cc3)O                                                 |
| ZINC08439334 | 4.38  | 10.08             | -55.64           | 1        | 8           | -1     | 452.464         | 7              | CCOC(=O)c1c2c1cc(c3c2ccc3)NS(=O)(=O)c4ccc(cc4)C(=O)O-                                  |
| ZINC08439334 | 4.38  | 10.16             | -110.37          | 0        | 8           | -2     | 451.456         | 7              | CCOC(=O)c1c2c1cc(c3c2ccc3)N-]S(=O)(=O)c4ccc(cc4)C(=O)O-                                |
| ZINC08439332 | 4.49  | -1.79             | -56.07           | 1        | 8           | -1     | 464.475         | 8              | Cc1c(c2ccc(cc2o1)NS(=O)(=O)c3ccc(cc3)C(=O)O-)C(=O)OCc4ccc4                             |
| ZINC0622380  | 5.29  | 0.45              | -9.12            | 1        | 5           | 0      | 489.309         | 7              | COc1ccc1NC(=O)c2cc(c(c2)O)OCc3ccc3OC                                                   |
| ZINC05396721 | 5.71  | 12.08             | -10.45           | 0        | 5           | 0      | 431.532         | 6              | CC1=NC2=C([C@@H](C1C(=O)OC)c3ccc(c3)OC4ccc4)C(=O)CC(C2)C                               |
| ZINC05396721 | 5.89  | 11.87             | -11.23           | 0        | 5           | 0      | 431.532         | 6              | CC1(CC2=NC=C(C)[C@@H](C2C(=O)C1)c3ccc(c3)OC4ccc4)C(=O)OC                               |
| ZINC05396721 | 5.89  | 12.71             | -18.76           | 0        | 5           | 0      | 431.532         | 6              | CC1(CC2=NC=C(C)[C@@H](C2C(=O)C1)c3ccc(c3)OC4ccc4)C(=O)OC                               |
| ZINC05396721 | 5.71  | 12.07             | -13.5            | 0        | 5           | 0      | 431.532         | 6              | CC1=C([C@@H](C@H)2C(=N1)CC(C2=O)C)C3ccc(c3)OC4ccc4)C(=O)OC                             |
| ZINC08439331 | 4.01  | 9.16              | -58.01           | 1        | 8           | -1     | 438.437         | 6              | Cc1c(c2cc(c3ccc3c2o1)NS(=O)(=O)c4ccc(cc4)C(=O)O-)C(=O)OC                               |
| ZINC08439331 | 4.01  | 9.24              | -109.57          | 0        | 8           | -2     | 437.429         | 6              | Cc1c(c2cc(c3ccc3c2o1)NS(=O)(=O)c4ccc(cc4)C(=O)O-)C(=O)OC                               |
| ZINC08439330 | 4.63  | -1.01             | -21.84           | 0        | 6           | 0      | 452.919         | 5              | COc1ccc(cc1)N(C(=O)c2ccc2)S(=O)(=O)c3ccc4c3nccc4                                       |
| ZINC0622370  | 5.41  | 0.91              | -9.41            | 1        | 4           | 0      | 426.31          | 6              | Cc1ccc1NC(=O)c2cc(c(c2)Br)OCc3ccc3OC                                                   |
| ZINC05396702 | 5.71  | 12.08             | -10.44           | 0        | 5           | 0      | 431.532         | 6              | CC1=NC2=C([C@@H](C1C(=O)OC)c3ccc(c3)OC4ccc4)C(=O)CC(C2)C                               |
| ZINC05396702 | 5.89  | 11.86             | -11.45           | 0        | 5           | 0      | 431.532         | 6              | CC1(CC2=NC=C(C)[C@@H](C2C(=O)C1)c3ccc(c3)OC4ccc4)C(=O)OC                               |
| ZINC05396702 | 5.89  | 12.79             | -10.9            | 0        | 5           | 0      | 431.532         | 6              | CC1(CC2=NC=C(C)[C@@H](C2C(=O)C1)c3ccc(c3)OC4ccc4)C(=O)OC                               |
| ZINC05396702 | 5.71  | 12.05             | -13.53           | 0        | 5           | 0      | 431.532         | 6              | CC1=C([C@@H](C@H)2C(=N1)CC(C2=O)C)C3ccc(c3)OC4ccc4)C(=O)OC                             |
| ZINC08439329 | 4.67  | -1.01             | -17.69           | 0        | 6           | 0      | 452.919         | 5              | COc1ccc(cc1)N(C(=O)c2ccc(cc2)S(=O)(=O)c3ccc4c3nccc4                                    |
| ZINC02170396 | 5.13  | 2.74              | -6.87            | 1        | 4           | 0      | 432.236         | 7              | CCCCc1c(cc1Br)C(=O)Nc2ccc2C(F)(F)F                                                     |
| ZINC08439328 | 6.64  | 0.15              | -13.45           | 1        | 6           | 0      | 477.582         | 7              | CCOC(=O)c1c2cc(ccc2oc1c3ccc3)NS(=O)(=O)c4cc(c(c4)C)C                                   |
| ZINC08439327 | 4.84  | 3.55              | -17.1            | 0        | 7           | 0      | 469.578         | 9              | CC[C@@H](C)OC(=O)C1[C@@H](C2=C(C)C)C2=O)N=C1C3ccc(c(c3)OCC)OC(=O)C                     |
| ZINC08439327 | 4.84  | 3.53              | -17.85           | 0        | 7           | 0      | 469.578         | 9              | CC[C@@H](C)OC(=O)C1=C(N=C2CC(C)C)C2)C@H1c3ccc(cc3)OCC)OC(=O)C)C                        |
| ZINC08439327 | 5.02  | 2.66              | -15.88           | 0        | 7           | 0      | 469.578         | 9              | CC[C@@H](C)OC(=O)C1[C@@H](C2=C(C)C)C2=O)N=C1C3ccc(c(c3)OCC)OC(=O)C                     |
| ZINC08439326 | 7.56  | -5.28             | -12.07           | 2        | 5           | 0      | 498.695         | 6              | Cc1ccc(cc1)S(=O)(=O)Nc2ccc(c2)Sc3n4cccc4s3)O)C(C)C                                     |
| ZINC08439325 | 4.84  | 3.59              | -13.55           | 0        | 7           | 0      | 469.578         | 9              | CC[C@@H](C)OC(=O)C1[C@@H](C2=C(C)C)C2=O)N=C1C3ccc(c(c3)OCC)OC(=O)C                     |
| ZINC08439325 | 4.84  | 3.57              | -16.29           | 0        | 7           | 0      | 469.578         | 9              | CC[C@@H](C)OC(=O)C1=C(N=C2CC(C)C)C2)C@H1c3ccc(cc3)OCC)OC(=O)C)C                        |
| ZINC08439325 | 5.02  | 2.64              | -13.79           | 0        | 7           | 0      | 469.578         | 9              | CC[C@@H](C)OC(=O)C1[C@@H](C2=C(C)C)C2=O)N=C1C3ccc(c(c3)OCC)OC(=O)C                     |
| ZINC08439324 | 6.17  | -5.14             | -11.34           | 2        | 4           | 0      | 441.961         | 5              | c1ccc(cc1)S(=O)(=O)Nc2cc(c(c3c2ccc3)O)Sc4ccc4                                          |
| ZINC08439323 | 6.76  | -3.93             | -13.14           | 2        | 4           | 0      | 449.597         | 5              | Cc1ccc(cc1)S(=O)(=O)Nc2cc(c(c3c2ccc3)O)Sc4ccc4                                         |

Supplementary Table S2:

Detailed table of XP Docking using Schrodinger's Glide module

| ZINC_ID      | xLogP | ApolarDesolvation | PolarDesolvation | H Donors | H Acceptors | Charge | MolecularWeight | RotatableBonds | SMILES                                                                  |
|--------------|-------|-------------------|------------------|----------|-------------|--------|-----------------|----------------|-------------------------------------------------------------------------|
| ZINC03765149 | 5     | -2.64             | -58.01           | 1        | 8           | -1     | 467.523         | 9              | CCOc1cccc1N(CC(=O)Nc2cccc2C(=O)[O-])S(=O)(=O)c3ccc(cc3)C                |
| ZINC02987093 | 3.27  | -3.62             | -22.35           | 0        | 1           | 0      | 406.504         | 7              | CCOc1cccc1N(CC(=O)NCCc2ccc(cc2)OC)S(=O)(=O)C                            |
| ZINC08439322 | 4.84  | 3.58              | -12.85           | 0        | 7           | 0      | 469.578         | 9              | CC[C@@H](C)OC(=O)C1[C@@H](C2=C(C(C)C(=O)C)N=C1C)c3ccc(c(c3)OC)OC(=O)C   |
| ZINC08439322 | 4.84  | 3.66              | -17.23           | 0        | 7           | 0      | 469.578         | 9              | CC[C@@H](C)OC(=O)C1=C(N=C2C(C(C)C(=O)C)C@H)1c3ccc(c(c3)OC)OC(=O)C(C)C   |
| ZINC08439322 | 5.02  | 2.74              | -14.64           | 0        | 7           | 0      | 469.578         | 9              | CC[C@@H](C)OC(=O)C1[C@@H](C2=C(NC1=C)CC(C2=O)(C)C)c3ccc(c(c3)OC)OC(=O)C |
| ZINC08439321 | 6.32  | -4.25             | -13.3            | 2        | 4           | 0      | 435.57          | 5              | Cc1ccc(c(c1)C)Sc2cc(c3cccc3c2O)NS(=O)(=O)c4cccc4                        |
| ZINC04174231 | 5.64  | 10.69             | -52.41           | 1        | 7           | -1     | 471.942         | 7              | Cc1ccc(cc1)S(=O)(=O)N(CC(=O)Nc2cccc2C(=O)[O-])c3ccc(cc3)C               |
| ZINC08439320 | 3.74  | -4.42             | -58.06           | 2        | 6           | -1     | 420.463         | 6              | Cc1ccc(ccc1S(=O)(=O)Nc2cc(c(c3c2cccc3)O)SCC(=O)O)F                      |
| ZINC08439319 | 4.84  | 3.58              | -12.7            | 0        | 7           | 0      | 469.578         | 9              | CC[C@@H](C)OC(=O)C1[C@@H](C2=C(C(C)C(=O)C)N=C1C)c3ccc(c(c3)OC)OC(=O)C   |
| ZINC08439319 | 4.84  | 3.65              | -17.03           | 0        | 7           | 0      | 469.578         | 9              | CC[C@@H](C)OC(=O)C1=C(N=C2C(C(C)C(=O)C)C@H)1c3ccc(c(c3)OC)OC(=O)C(C)C   |
| ZINC08439319 | 5.02  | 2.73              | -14.52           | 0        | 7           | 0      | 469.578         | 9              | CC[C@@H](C)OC(=O)C1[C@@H](C2=C(NC1=C)CC(C2=O)(C)C)c3ccc(c(c3)OC)OC(=O)C |
| ZINC08439318 | 4.64  | -0.27             | -15.66           | 1        | 6           | 0      | 427.453         | 5              | Cc1cc(c(cc1S(=O)(=O)Nc2cc3c(c3oc3c4c2cccc4)C)C(=O)OC)F                  |
| ZINC08439317 | 5.66  | -2.87             | -20.83           | 1        | 7           | 0      | 488.993         | 9              | CCOc1ccc(cc1)NC(=O)CN(c2ccc(c(c2)C)OC)S(=O)(=O)c3ccc(cc3)C              |
| ZINC06270540 | 2.27  | 1.91              | -47.82           | 2        | 7           | -1     | 353.43          | 5              | c1ccc(sc1)S(=O)(=O)N[n-]c2ccc(c(c2)Sc3[nH]n3)O                          |
| ZINC08439316 | 5.58  | 14.81             | -16.72           | 1        | 4           | 0      | 435.589         | 6              | Cc1ccc(s1)[C@@H]2C3=C(CC(C3=O)(C)C)NC(=O)C2C(=O)OCc4cccc4)C             |
| ZINC08439316 | 5.7   | -0.58             | -8.02            | 0        | 4           | 0      | 435.589         | 6              | Cc1ccc(s1)[C@@H]2C3=C(CC(C3=O)(C)C)NC(=O)C2C(=O)OCc4cccc4)C(C)C         |
| ZINC08439315 | 2.91  | -3.06             | -25.6            | 1        | 8           | 0      | 436.53          | 10             | Cc1ccc(c(c1)N(CC(=O)NCCc2ccc(cc2)OC)OC)S(=O)(=O)C                       |
| ZINC08439312 | 5.58  | 14.81             | -16.83           | 1        | 4           | 0      | 435.589         | 6              | Cc1ccc(s1)[C@@H]2C3=C(C(C)C(=O)C)C)NC(=O)C2C(=O)OCc4cccc4)C             |
| ZINC08439312 | 5.7   | -0.48             | -10.39           | 0        | 4           | 0      | 435.589         | 6              | Cc1ccc(s1)[C@@H]2C3=C(O)CC(C=C3N=C(C2(C)O)OCc4cccc4)C(C)C               |
| ZINC08439311 | 4.43  | -0.93             | -17.02           | 1        | 7           | 0      | 471.506         | 8              | Cc1ccc(ccc1S(=O)(=O)Nc2cc3c(c3oc3c4c2cccc4)C)C(=O)OC)C                  |
| ZINC02986980 | 4.39  | -2.96             | -25.93           | 1        | 6           | 0      | 404.532         | 9              | CC(C)Cccc(cc1)N(CC(=O)NCCc2ccc(cc2)OC)S(=O)(=O)C                        |
| ZINC0969280  | 4.46  | -3.55             | -14.2            | 2        | 5           | 0      | 436.278         | 5              | c1ccc(c(c1)/C=N/NC(=O)CSc2[nH]c3ccc3n2)I                                |
| ZINC08439310 | 4.55  | -4.9              | -16.13           | 2        | 6           | 0      | 452.504         | 6              | Cc1cc(c(cc1S(=O)(=O)Nc2ccc(cc2)NS(=O)(=O)c3ccc(cc3)F)F                  |
| ZINC04174238 | 5.55  | -3.12             | -21.22           | 1        | 6           | 0      | 468.619         | 7              | COc1ccc(cc1)NC(=O)CN(c2ccc(cc2)C34CC5C(C)C3CC(C5)C4)S(=O)(=O)C          |
| ZINC08439309 | 3.85  | -2.44             | -23.81           | 1        | 8           | 0      | 490.537         | 8              | Cc1c(c2ccc(c3cccc3c2o1)NS(=O)(=O)c4cccc5c4nccc5)C(=O)OC)C               |
| ZINC08439308 | 5.71  | 1.03              | -13.39           | 0        | 5           | 0      | 454.942         | 3              | c1ccc(cc1)n2cc(c(n2)c3ccc(cc3)Cl)/C=C4/c(=O)n5c6cccc6n5s4               |
| ZINC08439307 | 3.51  | 1.46              | -13.91           | 0        | 7           | 0      | 433.457         | 6              | CCOC(=O)c1cc(o2c1cc(cc2)N(C(=O)C)S(=O)(=O)c3ccc(cc3)F)C                 |
| ZINC01013182 | 4     | -0.21             | -11.39           | 0        | 6           | 0      | 480.723         | 4              | c1ccc(ccc1C(=O)CN2C(=O)C(C=C/C3c4c(cc3Br)OC4)/S2=O)Cl                   |
| ZINC08439306 | 4.91  | 1.75              | -12.66           | 0        | 7           | 0      | 461.511         | 8              | CCCC(=O)N(c1ccc2c(c1)c(c(o2)C)C(=O)OC)S(=O)(=O)c3ccc(cc3)F              |
| ZINC01013180 | 3.87  | 0.37              | -11.55           | 0        | 6           | 0      | 436.272         | 4              | c1ccc(ccc1C(=O)CN2C(=O)C(C=C/C3c4c(cc3)OC4)/S2=O)Cl                     |
| ZINC09042127 | 3.65  | 2.5               | -43.63           | 2        | 7           | 1      | 439.532         | 9              | CC(NH+)(CC)CCN1C@H(/C=C(/c2ccc2)O)/C(=O)C1=O)c3cc(ccc3OC)OC             |
| ZINC08439304 | 4.6   | 1.2               | -14.09           | 0        | 6           | 0      | 431.485         | 6              | CCCC(=O)N(c1ccc2c(c1)c(c(o2)C)C(=O)C)S(=O)(=O)c3ccc(cc3)F               |
| ZINC02853302 | 4.21  | 10.21             | -17.4            | 0        | 7           | 0      | 455.513         | 6              | Cc1c(c2cc(ccc2o1)N(C(=O)c3cccc3)S(=O)(=O)c4cccc4)C(=O)OC                |
| ZINC02170296 | 5.66  | -3.58             | -29.83           | 2        | 5           | 0      | 480.387         | 5              | Cc1ccc(c1C)c2nc3cc(c3o2)NC(=O)SNC(=O)c4ccc(c4)Br                        |
| ZINC08439303 | 5.71  | 0.14              | -15.11           | 0        | 5           | 0      | 433.529         | 4              | Cc1cc(c(cc1)C)S(=O)(=O)N(c2ccc3c(c2)cc(o3)C)C(=O)c4cccc4)C              |
| ZINC06270551 | 4.18  | 7.51              | -69.18           | 1        | 6           | -1     | 436.9           | 5              | c1ccc(c(c1)C(=O)Nc2ccc(cc2)Cl)N-S(=O)(=O)c3ccc4c3nccc4                  |
| ZINC06270551 | 4.18  | 8.08              | -46.26           | 2        | 6           | 0      | 437.908         | 5              | c1ccc(c(c1)C(=O)Nc2ccc(cc2)Cl)N-S(=O)(=O)c3ccc4c3[nH+]ccc4              |
| ZINC0622060  | 6.51  | 9.08              | -16.13           | 1        | 6           | 0      | 489.325         | 5              | COc1ccc(cc1)NC(=O)c2ccc(o2)c3ccc(cc3)Br)4nc5cccc5o4                     |
| ZINC09042124 | 3.65  | 1.19              | -40.95           | 2        | 7           | 1      | 439.532         | 9              | CC(NH+)(CC)CCN1C@H(/C=C(/c2ccc2)O)/C(=O)C1=O)c3cc(ccc3OC)OC             |
| ZINC02170293 | 5.91  | 0.76              | -6.86            | 1        | 3           | 0      | 439.136         | 3              | Cc1cc(ccc1)NC(=O)c2ccc(o2)c3ccc(cc3)Cl)C)Br                             |
| ZINC08439301 | 5.44  | -0.24             | -16.82           | 0        | 7           | 0      | 492.94          | 5              | COc1ccc(cc1)OCc2ccc3(c2c2)OC3)/C=C4/c(=O)n5c6cccc6n5s4                  |
| ZINC08439300 | 5.99  | 0.32              | -14.8            | 1        | 6           | 0      | 455.507         | 6              | CC(C)C)c1c(c2cc(c3cccc3c2o1)NS(=O)(=O)c4ccc(cc4)F)C(=O)OC               |
| ZINC08439299 | 7.44  | 0.77              | -12.83           | 0        | 5           | 0      | 531.468         | 4              | Cc1ccc2c(c1)nc3n2c(=O)/c(=O)c4nc(nc45cccc5)C6ccc(cc6)Cl)Cl)S3           |
| ZINC08439298 | 6.25  | -0.38             | -15.81           | 1        | 7           | 0      | 481.57          | 8              | CCOc1ccc(cc1)S(=O)(=O)Nc2cc3c(c3oc3c4c2cccc4)C(C)C)C(=O)OC              |
| ZINC0622047  | 2.19  | -3.67             | -22.45           | 2        | 7           | 0      | 434.521         | 6              | c1ccc(cc1)C(=O)N2CCN(C2)c3ccc(cc3)NC(=O)SNC(=O)c4ccc4                   |
| ZINC08439297 | 1.38  | -10.73            | -15              | 0        | 9           | 0      | 484.577         | 4              | c1ccc(ccc1c3c2c(c1)C(=O)S3)S(=O)(=O)N4COCOC4)S(=O)(=O)N5CCOCOC5         |
| ZINC02170288 | 5.36  | 9.61              | -21.8            | 3        | 5           | 0      | 433.558         | 6              | CCc1ccc(cc1)C(=O)NC(=O)Nc2ccc(c2)c3c4cccc4s3)O                          |
| ZINC08439296 | 5.86  | 12.71             | -58.13           | 0        | 6           | -1     | 488.516         | 7              | Cc1c(c2cc(c3cccc3c2o1)N-S(=O)(=O)c4ccc(cc4)F)C(=O)OCc5cccc5             |
| ZINC08439296 | 5.86  | 12.64             | -15.57           | 1        | 6           | 0      | 489.524         | 7              | Cc1c(c2cc(c3cccc3c2o1)NS(=O)(=O)c4ccc(cc4)F)C(=O)OCc5cccc5              |
| ZINC01013175 | 4.87  | 0.7               | -21.57           | 1        | 9           | 0      | 581.046         | 9              | CCOc1ccc(ccc1OC(=O)Nc2cccc2)C=C3/C(=O)N(C(=O)S3)C4c4cc5c(cc4)OC)OC5     |
| ZINC08439294 | 4.64  | -1.36             | -14.11           | 1        | 7           | 0      | 451.5           | 8              | Cc1c(c2cc(ccc2o1)NS(=O)(=O)c3ccc(cc3)OC)C(=O)OCc4cccc4                  |
| ZINC08439293 | 4.47  | -0.44             | -11.97           | 0        | 5           | 0      | 431.311         | 4              | CCOc1ccc(cc1OC)C=C2/c(=O)n3c4cccc4nc3s2)Br                              |
| ZINC02170277 | 5.56  | 0.26              | -11.58           | 0        | 7           | 0      | 544.412         | 7              | COc1ccc(cc1)OCc2ccc(cc2)Cl)/C=C3/C(=O)N(C(=O)S3)C4c4cc5c(cc4)OC)OC5     |
| ZINC08439292 | 8.05  | -0.27             | -13.13           | 1        | 4           | 0      | 475.654         | 4              | Cc1cc(c(cc1)C)S(=O)(=O)Nc2cc3c4c(oc3c5c2cccc5)CC[C@@H](C4)C(C)C         |
| ZINC08439291 | 8.05  | -0.27             | -13.05           | 1        | 4           | 0      | 475.654         | 4              | Cc1cc(c(cc1)C)S(=O)(=O)Nc2cc3c4c(oc3c5c2cccc5)CC[C@@H](C4)C(C)C         |
| ZINC08439290 | 6.5   | 0.21              | -13.56           | 0        | 7           | 0      | 623.308         | 7              | COc1ccc(ccc1OCc2ccc(cc2)Cl)Br)/C=C3/C(=O)N(C(=O)S3)C4c4cc5c(cc4)OC)OC5  |
| ZINC08439289 | 6.48  | -0.74             | -22.03           | 1        | 5           | 0      | 461.583         | 3              | Cc1ccc(ccc1)C)S(=O)(=O)Nc2cc3c4c(oc3c5c2cccc5)CC(C4=O)C(C)C             |
| ZINC08439287 | 5.59  | -1.53             | -22.98           | 1        | 5           | 0      | 433.529         | 3              | Cc1ccc(ccc1)C)S(=O)(=O)Nc2cc3c4c(oc3c5c2cccc5)CC(C4=O)C                 |
| ZINC02170255 | 6.17  | 0.18              | -10.17           | 0        | 7           | 0      | 578.875         | 7              | COc1ccc(ccc1OCc2ccc(cc2)Cl)/C=C3/C(=O)N(C(=O)S3)C4c4cc5c(cc4)OC)OC5     |
| ZINC02497152 | 4.99  | -1.71             | -13.53           | 1        | 5           | 0      | 450.354         | 4              | Cc1cc(c(cc1)C)S(=O)(=O)Nc2cc3c(c3oc3c2)Br)C(=O)C                        |
| ZINC02170251 | 5.25  | 0.14              | -8.37            | 0        | 6           | 0      | 479.941         | 6              | c1ccc(cc1)OCc2cccc2/C=C3/C(=O)N(C(=O)S3)C4c4cc5c(cc4)OC)OC5             |

Supplementary Table S2:

Detailed table of XP Docking using Schrodinger's Glide module

| ZINC_ID      | xLogP | ApolarDesolvation | PolarDesolvation | H Donors | H Acceptors | Charge | MolecularWeight | RotatableBonds | SMILES                                                                 |
|--------------|-------|-------------------|------------------|----------|-------------|--------|-----------------|----------------|------------------------------------------------------------------------|
| ZINC08439286 | 6.12  | -2.19             | -19.02           | 1        | 6           | 0      | 477.563         | 7              | CCOC(=O)c1c2cc(c3cccc3c2oc1e4cccc4)NS(=O)(=O)c5cccc5                   |
| ZINC08439285 | 4.98  | 13.62             | -24.71           | 1        | 4           | 0      | 457.382         | 6              | CC1=C([C@H]([C=C(N1)SCC(=O)c2ccc(cc2)C]C#N)c3cccc3C]C(=O)C             |
| ZINC08439285 | 5.5   | 0.78              | -11.69           | 0        | 4           | 0      | 457.382         | 6              | CC(=O)C1([C@H]([C=C(N1)SCC(=O)c2ccc(cc2)C]C#N)c3cccc3C]C               |
| ZINC08439285 | 5.32  | 0.55              | -11.65           | 0        | 4           | 0      | 457.382         | 6              | CC1=C([C@H]([C@H]([C=C(N1)SCC(=O)c2ccc(cc2)C]C#N)c3cccc3C]C(=O)C       |
| ZINC01013166 | 4.4   | 0.33              | -12.33           | 0        | 7           | 0      | 475.95          | 7              | CCOC1ccc(ccc1OC(C)C)/C=C/2/C(=O)N(C(=O)S2)C6c3c4c(cc3c1)OC04           |
| ZINC08439284 | 4.8   | -2.7              | -15.99           | 1        | 6           | 0      | 430.485         | 3              | Cc1ccc(cc1)S(=O)(=O)Nc2ccc3c4c2c(=O)c5cccc5-c4ccc(=O)n3C               |
| ZINC01013164 | 4.19  | -1.52             | -11.29           | 1        | 7           | 0      | 468.314         | 5              | CCOC1ccc(ccc1OC)C]/C=C/2/C(=O)N(C(=O)S2)C6c3c4c(cc3c1)OC04             |
| ZINC08439283 | 5.54  | 9.06              | -17.22           | 1        | 7           | 0      | 464.474         | 6              | CO(C=O)c1ccc(cc1)NC2=CC(=NS(=O)=O)c3ccc(cc3)F]c4cccc4c2=O              |
| ZINC08439282 | 7.23  | -1.19             | -11.5            | 1        | 4           | 0      | 447.6           | 4              | C([C@H]1CCc2c(c3ccc(c4cccc4c3o2)NS(=O)=O)c5ccc(cc5)C(C)(C)C]1          |
| ZINC02170239 | 4.38  | 1                 | -12.91           | 0        | 7           | 0      | 536.787         | 6              | COc1ccc(ccc1OC(C)Br)/C=C/2/C(=O)N(C(=O)S2)C6c3c4c(cc3c1)OC04           |
| ZINC08439281 | 4.98  | 13.01             | -20.76           | 1        | 4           | 0      | 457.382         | 6              | CC1=C([C@H]([C=C(N1)SCC(=O)c2ccc(cc2)C]C#N)c3cccc3C]C(=O)C             |
| ZINC08439281 | 5.5   | 0.56              | -11.5            | 0        | 4           | 0      | 457.382         | 6              | CC(=O)C1([C@H]([C=C(N1)SCC(=O)c2ccc(cc2)C]C#N)c3cccc3C]C               |
| ZINC08439281 | 5.32  | 0.43              | -9.95            | 0        | 4           | 0      | 457.382         | 6              | CC1=C([C@H]([C@H]([C=C(N1)SCC(=O)c2ccc(cc2)C]C#N)c3cccc3C]C(=O)C       |
| ZINC08439280 | 7.23  | -1.19             | -11.53           | 1        | 4           | 0      | 447.6           | 4              | C([C@H]1CCc2c(c3ccc(c4cccc4c3o2)NS(=O)=O)c5ccc(cc5)C(C)(C)C]1          |
| ZINC02170234 | 5.31  | 1.52              | -13.06           | 0        | 7           | 0      | 523.994         | 7              | C1cccc(c1)COc2ccc(cc2OC)/C=C/3/C(=O)N(C(=O)S3)C6c4c5c(cc4c1)OC05       |
| ZINC08439279 | 5.12  | 9.34              | -14.59           | 1        | 7           | 0      | 451.5           | 8              | CCOC(=O)c1c2cc(ccc2oc1c3cccc3)NS(=O)(=O)c4ccc(cc4)OC                   |
| ZINC08439279 | 5.12  | 9.37              | -50.55           | 0        | 7           | -1     | 450.492         | 8              | CCOC(=O)c1c2cc(ccc2oc1c3cccc3)N]S(=O)=O)c4ccc(cc4)OC                   |
| ZINC02170228 | 4.66  | 1.28              | -13.03           | 0        | 7           | 0      | 583.787         | 6              | COc1ccc(ccc1OC(C)Br)/C=C/2/C(=O)N(C(=O)S2)C6c3c4c(cc3c1)OC04           |
| ZINC02502128 | 4.53  | -2.29             | -14.47           | 1        | 6           | 0      | 457.382         | 6              | CC1=C([C@H]([C=C(N1)SCC(=O)c2ccc(cc2)C]C#N)c3cccc3C]C(=O)C             |
| ZINC08439278 | 5.98  | 1.09              | -13.98           | 0        | 7           | 0      | 606.853         | 7              | COc1ccc(ccc1OCc2ccc(cc2)F)Br]/C=C/3/C(=O)N(C(=O)S3)C6c4c5c(cc4c1)OC05  |
| ZINC08439277 | 5.87  | 15.92             | -18.51           | 2        | 6           | 0      | 530.049         | 9              | CC1=C([C@H]([C=C(N1)SCC(=O)OCc2cccc2]C#N)c3cccc3C]C(=O)Nc4cccc4        |
| ZINC08439277 | 6.39  | 0.26              | -12.43           | 1        | 6           | 0      | 530.049         | 9              | C=C1C([C@H]([C=C(N1)SCC(=O)OCc2cccc2]C#N)c3cccc3C]C(=O)Nc4cccc4        |
| ZINC08439277 | 6.39  | 2.04              | -22.4            | 1        | 6           | 0      | 530.049         | 9              | C=C1C([C@H]([C@H]([C=C(N1)SCC(=O)OCc2cccc2]C#N)c3cccc3C]C(=O)Nc4cccc4  |
| ZINC02484247 | 5.43  | -0.37             | -15.22           | 1        | 6           | 0      | 429.538         | 7              | Cc1c2ccc(ccc2o1)NS(=O)(=O)c3ccc(cc3)C(C)(C)C]C(=O)OC]C]C               |
| ZINC01013162 | 4.66  | -0.55             | -9.14            | 1        | 6           | 0      | 440.908         | 4              | CC1cccc2c1nH]cc2/C=C/3/C(=O)N(C(=O)S3)C6c4c5c(cc4c1)OC05               |
| ZINC08439276 | 4.07  | -2.63             | -15.64           | 1        | 7           | 0      | 458.319         | 8              | Cc1c2ccc(ccc2o1)NS(=O)(=O)c3ccc(cc3C]C]C(=O)OC]C                       |
| ZINC01013161 | 4.58  | -1.77             | -9.7             | 1        | 6           | 0      | 491.75          | 3              | Cc1cc2(c1)COc2ccc(cc2OC)/C=C/3/C(=O)N(C(=O)S3)C6c4c5c(cc4c1)OC05       |
| ZINC02484255 | 3.98  | -0.95             | -15.38           | 1        | 7           | 0      | 431.51          | 8              | Cc1ccc(ccc1C)S(=O)(=O)Nc2ccc3c2c(c(c3)C)C(=O)OC]C]C                    |
| ZINC01013156 | 3.68  | -0.08             | -10.23           | 0        | 7           | 0      | 433.869         | 5              | COc1ccc(ccc1OC)C]/C=C/2/C(=O)N(C(=O)S2)C6c3c4c(cc3c1)OC04              |
| ZINC04149911 | 5.19  | 8.66              | -49.01           | 1        | 8           | -1     | 477.518         | 8              | CCCCOC(=O)c1c2cc2c1cc(cc2)N]S(=O)=O)c3ccc4c5c3ccc5c(C(=O)N4)C          |
| ZINC04149911 | 5.19  | 8.63              | -16.98           | 2        | 8           | 0      | 478.526         | 8              | CCCCOC(=O)c1c2cc2c1cc(cc2)NS(=O)(=O)c3ccc4c5c3ccc5c(C(=O)N4)C          |
| ZINC08439275 | 5.87  | 15.93             | -18.48           | 2        | 6           | 0      | 530.049         | 9              | CC1=C([C@H]([C=C(N1)SCC(=O)OCc2cccc2]C#N)c3cccc3C]C(=O)Nc4cccc4        |
| ZINC08439275 | 6.39  | 0.25              | -11.97           | 1        | 6           | 0      | 530.049         | 9              | C=C1C([C@H]([C=C(N1)SCC(=O)OCc2cccc2]C#N)c3cccc3C]C(=O)Nc4cccc4        |
| ZINC08439275 | 6.39  | 1.78              | -13.07           | 1        | 6           | 0      | 530.049         | 9              | C=C1C([C@H]([C@H]([C=C(N1)SCC(=O)OCc2cccc2]C#N)c3cccc3C]C(=O)Nc4cccc4  |
| ZINC08439275 | 6.21  | 0.56              | -11.17           | 1        | 6           | 0      | 530.049         | 9              | CC1=C([C@H]([C@H]([C=C(N1)SCC(=O)OCc2cccc2]C#N)c3cccc3C]C(=O)Nc4cccc4  |
| ZINC08439274 | 4.76  | 1.16              | -19.57           | 1        | 7           | 0      | 541             | 8              | Cc1ccc(c1)NC(=O)COc2ccc(cc2OC)/C=C/3/C(=O)N(C(=O)S3)C6c4c(ccc4c1)F     |
| ZINC02497138 | 5.61  | -1.17             | -13.34           | 1        | 6           | 0      | 437.517         | 8              | CCCCOC(=O)c1c2cc2c1cc(cc2)NS(=O)(=O)c3ccc4c4ccc4c3C                    |
| ZINC02170185 | 5.54  | 1.58              | -9.92            | 0        | 4           | 0      | 453.922         | 6              | c1ccc(cc1)COc2ccc(cc2)/C=C/3/C(=O)N(C(=O)S3)C6c4c(ccc4c1)F             |
| ZINC02490679 | 4.86  | -1.55             | -15.25           | 1        | 7           | 0      | 431.51          | 10             | CCCCOC(=O)c1c2cc2c1cc(cc2)NS(=O)(=O)c3ccc(cc3)OC]C                     |
| ZINC02170179 | 6.8   | 1.34              | -9.91            | 0        | 4           | 0      | 522.812         | 6              | c1ccc(ccc1)COc2ccc(cc2)/C=C/3/C(=O)N(C(=O)S3)C6c4c(ccc4c1)F]Cl         |
| ZINC02502130 | 5.23  | -2.35             | -13.93           | 1        | 6           | 0      | 466.353         | 8              | CCCCOC(=O)c1c2cc2c1cc(cc2)NS(=O)(=O)c3ccc(cc3)Br]C                     |
| ZINC00716242 | 5.21  | 13.5              | -18.99           | 1        | 6           | 0      | 439.924         | 6              | CC1=C([C@H]([C=C(N1)SCc2cccc2]N+](=O)[O-])C#N)c3ccc(cc3)C]C(=O)C       |
| ZINC00716242 | 5.72  | 12.19             | -14.08           | 0        | 6           | 0      | 439.924         | 6              | CC(=O)C1([C@H]([C=C(N1)SCc2cccc2]N+](=O)[O-])C#N)c3ccc(cc3)C]C         |
| ZINC00716242 | 5.72  | 13.26             | -21.61           | 0        | 6           | 0      | 439.924         | 6              | CC(=O)C1([C@H]([C@H]([C=C(N1)SCc2cccc2]N+](=O)[O-])C#N)c3ccc(cc3)C]C   |
| ZINC00716242 | 5.54  | 12.38             | -13.26           | 0        | 6           | 0      | 439.924         | 6              | CC1=C([C@H]([C@H]([C=C(N1)SCc2cccc2]N+](=O)[O-])C#N)c3ccc(cc3)C]C(=O)C |
| ZINC08439272 | 6.73  | -0.85             | -16.95           | 1        | 6           | 0      | 487.577         | 8              | CCc1c(c2ccc(c3cccc3c2o1)NS(=O)(=O)c4ccc5cccc5c4)C(=O)OC                |
| ZINC02170170 | 5.12  | 1.16              | -10.69           | 0        | 5           | 0      | 547.773         | 6              | COc1ccc(ccc1OC)C]/C=C/2/C(=O)N(C(=O)S2)C6c3c4c(cc3c1)F                 |
| ZINC08439271 | 5.62  | -1.13             | -13.2            | 1        | 6           | 0      | 437.517         | 8              | CCCc1c(c2ccc(ccc2o1)NS(=O)(=O)c3ccc4c4ccc4c3)C(=O)OC                   |
| ZINC08439270 | 7.6   | 1.48              | -13.4            | 0        | 5           | 0      | 626.931         | 8              | COc1ccc(ccc1OCc2ccc3c2ccc3)Br]/C=C/4/C(=O)N(C(=O)S4)C6c5c(ccc5c1)F     |
| ZINC08439269 | 5.72  | -1.77             | -13.24           | 1        | 6           | 0      | 456.347         | 8              | CCCc1c(c2ccc(ccc2o1)NS(=O)(=O)c3ccc(cc3)C]C]C(=O)OC                    |
| ZINC08439268 | 5.21  | 14.03             | -21.93           | 1        | 6           | 0      | 439.924         | 6              | CC1=C([C@H]([C=C(N1)SCc2cccc2]N+](=O)[O-])C#N)c3ccc(cc3)C]C(=O)C       |
| ZINC08439268 | 5.72  | 1.23              | -15.89           | 0        | 6           | 0      | 439.924         | 6              | CC(=O)C1([C@H]([C=C(N1)SCc2cccc2]N+](=O)[O-])C#N)c3ccc(cc3)C]C         |
| ZINC08439268 | 5.54  | 1.09              | -14.57           | 0        | 6           | 0      | 439.924         | 6              | CC1=C([C@H]([C@H]([C=C(N1)SCc2cccc2]N+](=O)[O-])C#N)c3ccc(cc3)C]C(=O)C |
| ZINC08439267 | 7.02  | 1.11              | -11.23           | 0        | 5           | 0      | 644.289         | 7              | COc1ccc(ccc1OCc2ccc(cc2)C]C]C]/C=C/3/C(=O)N(C(=O)S3)C6c4c(ccc4c1)F     |
| ZINC04149912 | 5.54  | -1.02             | -16.21           | 1        | 6           | 0      | 437.517         | 8              | CCCCOC(=O)c1c2cc2c1cc(c3c2ccc3)NS(=O)(=O)c4cccc4C                      |
| ZINC08439266 | 5.58  | 0.38              | -15.73           | 0        | 5           | 0      | 448.931         | 5              | COc1ccc(ccc1OCc2cccc2)C]/C=C/3/C(=O)N(C(=O)S3)C6c4c(ccc4c1)F           |
| ZINC02170161 | 5.25  | 2.69              | -11.97           | 0        | 5           | 0      | 501.938         | 7              | COc1ccc(ccc1OCc2cccc2)F]/C=C/3/C(=O)N(C(=O)S3)C6c4c(ccc4c1)F           |
| ZINC08439265 | 6.1   | -0.88             | -16.19           | 1        | 7           | 0      | 481.57          | 10             | CCCCOC(=O)c1c2cc2c1cc(c3c2ccc3)NS(=O)(=O)c4ccc(cc4)OC]C                |
| ZINC08439264 | 6.51  | -0.22             | -16.96           | 0        | 5           | 0      | 527.827         | 5              | COc1ccc(ccc1OCc2cccc2)Br]/C=C/3/C(=O)N(C(=O)S3)C6c5c(ccc5c1)F]Cl       |
| ZINC02170156 | 6.33  | 1.82              | -10.14           | 0        | 4           | 0      | 511.405         | 5              | c1ccc(cc1)Cn2cc(c3c2ccc3)/C=C/4/C(=O)N(C(=O)S4)C6c5c(ccc5c1)F]Cl       |
| ZINC08439263 | 5.61  | -1.61             | -14              | 1        | 6           | 0      | 435.929         | 9              | CCCCOC(=O)c1c2cc2c1cc(cc2)NS(=O)(=O)c3ccc(cc3)C]C                      |



Supplementary Table S2:

Detailed table of XP Docking using Schrodinger's Glide module

| ZINC_ID      | sLogP | ApolarDesolvation | PolarDesolvation | H Donors | H Acceptors | Charge | MolecularWeight | RotatableBonds | SMILES                                                                    |
|--------------|-------|-------------------|------------------|----------|-------------|--------|-----------------|----------------|---------------------------------------------------------------------------|
| ZINC03219042 | 5.87  | -2.28             | -12.98           | 1        | 6           | 0      | 500.37          | 7              | CCOC(=O)c1c2cc(ccc2oc1c3cccc3)NS(=O)(=O)c4ccc(cc4)Br                      |
| ZINC08439262 | 7.07  | 1.24              | -12.15           | 0        | 5           | 0      | 611.316         | 8              | CCOC1cc(cc1OC2ccc2C1)Br)/C=C/3/C(=O)N(C(=O)S)C4c(ccc4C1)F                 |
| ZINC02694664 | 4.96  | 9.99              | -15.03           | 0        | 7           | 0      | 469.559         | 6              | Cc1c(c2cc(ccc2o1)N(C(=O)C3CCCC3)S(=O)(=O)c4ccc(cc4)OC)C(=O)C              |
| ZINC08439261 | 6.49  | 0.3               | -14.49           | 0        | 4           | 0      | 434.52          | 4              | c1ccc2c(c1)cccc2COC3ccc(c3)/C=C/4/c(=O)n5c6cccc6n5s4                      |
| ZINC03635711 | 6.86  | 13.71             | -12.92           | 0        | 5           | 0      | 465.615         | 4              | Cc1ccc(c(c1)C)S(=O)(=O)N(c2ccc3c(c2)e4c(o3)CCCC4)C(=O)C5CCCCC5            |
| ZINC08439260 | 4.69  | -1.29             | -16.53           | 1        | 8           | 0      | 475.478         | 5              | Cc1c(c2cc(ccc2o1)NS(=O)(=O)c3ccc4c(c3)C(=O)c5cccc5C4=O)C(=O)OC            |
| ZINC03635679 | 5.67  | 12.02             | -13.47           | 0        | 7           | 0      | 483.586         | 6              | Cc1ccc(c(c1)C)S(=O)(=O)N(c2ccc3c(c2)c(c(o3)C)C(=O)OC)C(=O)C4CCCC4         |
| ZINC08439259 | 6.79  | -0.28             | -16.26           | 0        | 5           | 0      | 574.827         | 5              | COc1cc(ccc1OC2ccc2C1)))/C=C/3/c(=O)n4c5cccc5n4s3                          |
| ZINC02503435 | 4.88  | -0.89             | -14.62           | 1        | 6           | 0      | 423.49          | 6              | Cc1c(c2cc(ccc2o1)NS(=O)(=O)c3cccc4c3ccc4)C(=O)OC(C)C                      |
| ZINC06142777 | 5.87  | -1.98             | -17.96           | 1        | 7           | 0      | 499.544         | 3              | CC1(Cc2c(c3cc(ccc3o2)NS(=O)(=O)c4ccc5c(c4)C(=O)c6cccc6C5=O)C(=O)C1)C      |
| ZINC08439257 | 5.27  | 11.42             | -18.61           | 0        | 8           | 0      | 499.585         | 8              | CCOC(=O)c1c2c1cc(cc2)N(C(=O)C3CCCC3)S(=O)(=O)c4ccc(cc4)OC)C               |
| ZINC02170138 | 4.57  | -0.87             | -11.13           | 1        | 5           | 0      | 486.746         | 5              | CCOC1cc(cc1O)Br)/C=C/2/C(=O)N(C(=O)S)C3c(c(ccc3C1)F                       |
| ZINC02503421 | 4.71  | -4.7              | -11.54           | 1        | 4           | 0      | 420.309         | 3              | c1cc2c(ccc3c2c(c1)C(=O)S3)S(=O)(=O)Nc4ccc(cc4)Br                          |
| ZINC00715097 | 3.25  | 9.95              | -53.53           | 0        | 8           | -1     | 424.389         | 5              | c1ccc(ccc1[C@H]2C(=C(C(=O)N2c3ncc3))O-)]C(=O)c4ccc(cc4)[N+](=O)[O-]F      |
| ZINC00715097 | 3.7   | 0.31              | -36.78           | 1        | 8           | 0      | 425.397         | 4              | c1ccc(ccc1[C@H]2C(=C(C3ccc(cc3)[N+](=O)[O-])O)C(=O)C(=O)N2c4ncc4)F        |
| ZINC00715097 | 2.67  | 0.54              | -24.55           | 0        | 8           | 0      | 425.397         | 5              | c1ccc(ccc1[C@H]2[C@@H](C(=O)C(=O)N2c3ncc3)C(=O)c4ccc(cc4)[N+](=O)[O-]F    |
| ZINC08439256 | 5.87  | -2.22             | -15.42           | 1        | 6           | 0      | 458.539         | 4              | CC(C)C1ccc(cc1)S(=O)(=O)Nc2ccc3c4c2C(=O)c5cccc5-c4cc(=O)n3C               |
| ZINC08439255 | 6.08  | 3.21              | -11.29           | 0        | 5           | 0      | 524.013         | 9              | COc1cc(ccc1OC2ccc2)CC=C)/C=C/3/C(=O)N(C(=O)S)C4c(ccc4C1)F                 |
| ZINC02503430 | 5.18  | -2.12             | -14.85           | 1        | 6           | 0      | 444.512         | 3              | Cc1ccc(c(c1)C)S(=O)(=O)Nc2ccc3c4c2C(=O)c5cccc5-c4cc(=O)n3C                |
| ZINC03635676 | 5.29  | 11.72             | -14.51           | 0        | 7           | 0      | 469.559         | 6              | Cc1ccc(cc1)S(=O)(=O)N(c2ccc3c(c2)c(c(o3)C)C(=O)OC)C(=O)C4CCCC4            |
| ZINC03635660 | 5.67  | 12.35             | -15.25           | 0        | 7           | 0      | 483.586         | 7              | CCOC(=O)c1c2c1cc(cc2)N(C(=O)C3CCCC3)S(=O)(=O)c4ccc(cc4)C)C                |
| ZINC08439254 | 4.44  | 1.54              | -22.42           | 1        | 7           | 0      | 502.592         | 8              | Cc1ccc(cc1)CN2C(=O)/C=C/c3ccc(c(c3)OC)CC(=O)Nc4cccc4)/SC2=O               |
| ZINC00715098 | 3.25  | 9.95              | -53.52           | 0        | 8           | -1     | 424.389         | 5              | c1ccc(ccc1[C@H]2C(=C(C(=O)N2c3ncc3))O-)]C(=O)c4ccc(cc4)[N+](=O)[O-]F      |
| ZINC00715098 | 3.7   | 0.31              | -36.34           | 1        | 8           | 0      | 425.397         | 4              | c1ccc(ccc1[C@H]2C(=C(C3ccc(cc3)[N+](=O)[O-])O)C(=O)C(=O)N2c4ncc4)F        |
| ZINC00715098 | 2.67  | 0.54              | -24.5            | 0        | 8           | 0      | 425.397         | 5              | c1ccc(ccc1[C@H]2[C@@H](C(=O)C(=O)N2c3ncc3)C(=O)c4ccc(cc4)[N+](=O)[O-]F    |
| ZINC03635694 | 5.52  | 11.41             | -13.04           | 0        | 7           | 0      | 489.977         | 6              | Cc1c(c2cc(ccc2o1)N(C(=O)C3CCCC3)S(=O)(=O)c4ccc(cc4)C)C(=O)OC              |
| ZINC03635668 | 4.84  | 11.03             | -14.9            | 0        | 7           | 0      | 455.532         | 6              | Cc1c(c2cc(ccc2o1)N(C(=O)C3CCCC3)S(=O)(=O)c4ccc(cc4)C)C(=O)OC              |
| ZINC03635652 | 5.36  | 11.37             | -15.11           | 0        | 6           | 0      | 453.56          | 5              | Cc1ccc(cc1)S(=O)(=O)N(c2ccc3c(c2)c(c(o3)C)C(=O)C)C(=O)C4CCCC4             |
| ZINC00950300 | 5.38  | 11.88             | -12.96           | 0        | 7           | 0      | 487.549         | 7              | CCOC(=O)c1c2c1cc(cc2)N(C(=O)C3CCCC3)S(=O)(=O)c4ccc(cc4)F)C                |
| ZINC02503431 | 5.03  | -3.17             | -14.96           | 1        | 6           | 0      | 450.903         | 3              | Cn1c2ccc(c3c2c(c1)=O)c4cccc4C3=O)NS(=O)(=O)c5ccc(cc5)C                    |
| ZINC03635671 | 5.76  | 12.48             | -14.17           | 0        | 7           | 0      | 483.586         | 7              | CC1ccc(cc1)S(=O)(=O)N(c2ccc3c(c2)c(c(o3)C)C(=O)OC)C(=O)C4CCCC4            |
| ZINC01013140 | 4.85  | 1.25              | -16.62           | 1        | 6           | 0      | 472.566         | 7              | Cc1ccc(cc1)CN2C(=O)/C=C/c3ccc(c(c3)OC)CC(=O)Nc4cccc4)/SC2=O               |
| ZINC08439251 | 5.07  | -1.32             | -16.36           | 1        | 8           | 0      | 489.505         | 6              | CCOC(=O)c1c2c1cc(cc2)NS(=O)(=O)c3ccc4c(c3)C(=O)c5cccc5C4=O)C              |
| ZINC02170096 | 4.95  | 1.43              | -56.68           | 0        | 6           | -1     | 452.895         | 5              | Cc1ccc(cc1)CN2C(=O)/C=C/c3ccc(o3)c4ccc(c4)C(=O)[O-]/SC2=O                 |
| ZINC08439250 | 7.44  | -0.43             | -15.03           | 0        | 5           | 0      | 609.272         | 5              | COc1cc(ccc1OC2ccc(cc2C1)))/C=C/3/c(=O)n4c5cccc5n4s3                       |
| ZINC02503433 | 4.81  | -3.73             | -16.66           | 1        | 5           | 0      | 428.513         | 6              | c1ccc(cc1)CN(Cc2ccc2)S(=O)(=O)c3ccc4c5c3ccc5C(=O)N4                       |
| ZINC08439249 | 6.36  | 2.26              | -8.76            | 0        | 4           | 0      | 465.574         | 6              | Cc1ccc(cc1)CN2C(=O)/C=C/c3c4cccc4ccc3OCc5cccc5)/SC2=O                     |
| ZINC08439248 | 5.59  | 11.19             | -13.77           | 0        | 6           | 0      | 473.978         | 5              | Cc1c(c2cc(ccc2o1)N(C(=O)C3CCCC3)S(=O)(=O)c4ccc(cc4)C)C(=O)C               |
| ZINC02694666 | 5.34  | 11.19             | -13.59           | 0        | 7           | 0      | 483.586         | 7              | COc1ccc(cc1)S(=O)(=O)N(c2ccc3c(c2)c(c(o3)C)C(=O)C)C(=O)C4CCCC4            |
| ZINC08439247 | 6.11  | 0.61              | -17.14           | 0        | 5           | 0      | 464.546         | 5              | COc1cc(ccc1OC2ccc3c2ccc3)/C=C/4/c(=O)n5c6cccc6n5s4                        |
| ZINC08439246 | 5.83  | 1.24              | -8.59            | 0        | 4           | 0      | 615.23          | 5              | Cc1ccc(cc1)CN2C(=O)/C=C/c3cc(c(c3)O)CC#C)O]/SC2=O                         |
| ZINC08439245 | 5.24  | -2.51             | -14.68           | 0        | 4           | 0      | 445.565         | 6              | c1ccc(cc1)CN(Cc2ccc2)S(=O)(=O)c3ccc4c5c3ccc5C(=O)S4                       |
| ZINC08439244 | 5.45  | 1.13              | -26.86           | 0        | 7           | 0      | 423.837         | 3              | c1ccc2c(c1)nc3n2c(=O)/c(c)c4ccc(o4)c5ccc(cc5N+)(=O)[O-]Cl)/s3             |
| ZINC03635715 | 7.24  | 14.55             | -13.57           | 0        | 5           | 0      | 479.642         | 4              | Cc1ccc(cc1)C)S(=O)(=O)N(c2ccc3c(c2)e4c(o3)CCCC4)C(=O)C5CCCC5)C            |
| ZINC02170054 | 4.97  | 1.74              | -14.66           | 3        | 7           | 0      | 549.469         | 7              | CC1(CC2=C(C(C@H)(C=C(N2Nc3cccc3)N(C)N)e4cc(c(c4)Br)OCC=C(O)C)C(=O)C1)C    |
| ZINC06142780 | 6.12  | -2.73             | -15.92           | 1        | 6           | 0      | 471.534         | 3              | C(C@H)1CCc2c(c3cc(ccc3o2)NS(=O)(=O)c4ccc5c(c4)C(=O)c6cccc6C5=O)C1         |
| ZINC02170057 | 4.97  | 1.76              | -14.66           | 3        | 7           | 0      | 549.469         | 7              | CC1(CC2=C(C(C@H)(C=C(N2Nc3cccc3)N(C)N)e4cc(c(c4)Br)OCC=C(O)C)C(=O)C1)C    |
| ZINC06142778 | 6.12  | -2.73             | -15.89           | 1        | 6           | 0      | 471.534         | 3              | C(C@H)1CCc2c(c3cc(ccc3o2)NS(=O)(=O)c4ccc5c(c4)C(=O)c6cccc6C5=O)C1         |
| ZINC08439242 | 5.11  | 14.72             | -38.71           | 2        | 9           | 1      | 486.552         | 6              | CC1CCN(CC1)c2ccc(cc2)N+([=O])[O-]/C=N/c3c([NH+][e4n3cccc4])c5ccc(cc5)OC)O |
| ZINC08439242 | 5.11  | 13.58             | -40.46           | 2        | 9           | 1      | 486.552         | 6              | CC1CCN(CC1)c2ccc(cc2)N+([=O])[O-]/C=N/c3c([NH+][e4n3cccc4])c5ccc(cc5)OC)O |
| ZINC08439241 | 5.23  | 8.69              | -13.14           | 0        | 4           | 0      | 418.312         | 2              | Cc1cc(ccc1)S(=O)(=O)N/C=C/2/C(=O)C(=O)c3c2ccc3)Br)C                       |
| ZINC02170050 | 4.99  | 15.58             | -18.52           | 3        | 7           | 0      | 520.633         | 7              | CC1(CC2=C(C(C@H)(C=C(N2Nc3cccc3)N(C)N)e4ccc(c4)OC)OCc5cccc5)C(=O)C1)C     |
| ZINC08439240 | 6.47  | 15.83             | -15.26           | 0        | 6           | 0      | 492.362         | 7              | COc1cccc(c1OC2ccc(cc2C1)C)/C=N/c3c(nc4n3cccc4)c5cccc5                     |
| ZINC08439240 | 6.47  | 14.21             | -13.14           | 0        | 6           | 0      | 492.362         | 7              | COc1cccc(c1OC2ccc(cc2C1)C)/C=N/c3c(nc4n3cccc4)c5cccc5                     |
| ZINC08439240 | 6.47  | 14.74             | -31.91           | 1        | 6           | 1      | 493.37          | 7              | COc1cccc(c1OC2ccc(cc2C1)C)/C=N/c3c([NH+][e4n3cccc4])c5cccc5               |
| ZINC08439240 | 6.47  | 16.24             | -30.01           | 1        | 6           | 1      | 493.37          | 7              | COc1cccc(c1OC2ccc(cc2C1)C)/C=N/c3c([NH+][e4n3cccc4])c5cccc5               |
| ZINC08439239 | 7.24  | 0.13              | -15.54           | 1        | 6           | 0      | 493.625         | 9              | CCCCOC(=O)c1c2c1cc(c3c2ccc3)NS(=O)(=O)c4ccc(cc4)C(C)C(C)C                 |
| ZINC08439238 | 6.31  | 1.46              | -10.21           | 1        | 5           | 0      | 456.977         | 8              | CCN(CC1)ccc(cc1)OC2ccc(cc2)C)/C=C/C(N)/c3[nH]e4cccc4n3                    |
| ZINC02170042 | 4.04  | 13                | -17.99           | 3        | 7           | 0      | 470.573         | 7              | CC1(CC2=C(C(C@H)(C=C(N2Nc3cccc3)N(C)N)e4ccc(c4)OC)OCC=C(O)C)C(=O)C1)C     |
| ZINC02502136 | 5.59  | -1                | -16.14           | 1        | 7           | 0      | 467.543         | 9              | CCCCOC(=O)c1c2c1cc(cc2)NS(=O)(=O)c4ccc(cc4)OC)C                           |
| ZINC08439237 | 7.39  | 0.76              | -12.85           | 0        | 4           | 0      | 481.404         | 4              | Cc1ccc2c(c1)nc3n2c(=O)/c(c)c4cccc4OCc5ccc(cc5)C1)Cl)/s3                   |





Supplementary Table S2:

Detailed table of XP Docking using Schrodinger's Glide module

| ZINC_ID      | sLogP | ApolarDesolvation | PolarDesolvation | H Donors | H Acceptors | Charge | MolecularWeight | RotatableBonds | SMILES                                                                  |
|--------------|-------|-------------------|------------------|----------|-------------|--------|-----------------|----------------|-------------------------------------------------------------------------|
| ZINC08439160 | 1.04  | 0.27              | -19.66           | 0        | 9           | 0      | 434.47          | 8              | CCOC(=O)COC1ccc(cc1)/C=C/2/C(=O)N(C(=O)S2)CC(=O)N3CCOCC3                |
| ZINC08439158 | 2.02  | -1.04             | -26.74           | 1        | 10          | 0      | 539.61          | 8              | Cc1ccc(cc1)CNC(=O)COC2ccc(cc2)C/C=C/3/C(=O)N(C(=O)S3)CC(=O)N4CCOCC4     |
| ZINC08439157 | 5.7   | 9.06              | -18.03           | 1        | 7           | 0      | 466.54          | 7              | CCOC(=O)c1ccc(cc1)NC2=C/C(=N\S(=O))=O)c3ccc3)/e4cccc4C2=O               |
| ZINC08439156 | 6.67  | 11.51             | -16.49           | 1        | 7           | 0      | 488.565         | 8              | CCc1ccc(cc1)S(=O)(=O)/N=C/2/C=C(C(=O)c3c2ccc3)Nc4ccc(cc4)C(=O)OCC       |
| ZINC01012880 | 1.82  | 0.49              | -23.72           | 0        | 8           | 0      | 440.477         | 5              | CC(=O)c1ccc(cc1)c2ccc(o2)/C=C/3/C(=O)N(C(=O)S3)CC(=O)N4CCOCC4           |
| ZINC08439155 | 6.58  | 11.52             | -17.64           | 1        | 7           | 0      | 488.565         | 7              | CCOC(=O)c1ccc(cc1)NC2=C/C(=N\S(=O))=O)c3ccc(cc3)C)/e4cccc4C2=O          |
| ZINC02169356 | 1.51  | -0.49             | -16.66           | 0        | 8           | 0      | 434.514         | 7              | CCOc1ccc(cc1)OC(C)/C=C/2/C(=O)N(C(=O)S2)CC(=O)N3CCOCC3                  |
| ZINC08439154 | 5.92  | 10.16             | -15.5            | 1        | 7           | 0      | 478.501         | 7              | CCOC(=O)c1ccc(cc1)NC2=C/C(=N\S(=O))=O)c3ccc(cc3)F)/e4cccc4C2=O          |
| ZINC08439153 | 3.71  | 0.39              | -71.76           | 1        | 8           | -1     | 481.893         | 6              | c1ccc(cc1)NC(=O)CN2C(=O)/C(=C/c3ccc(o3)c4ccc(cc4)C(=O)O-)]/SC2=O        |
| ZINC13143552 | 5.98  | 8.71              | -15.98           | 1        | 5           | 0      | 422.531         | 4              | Cc1ccc(cc1)NC2=C/C(=N\S(=O))=O)c3ccc3)/e4cccc4C2=O                      |
| ZINC02169330 | 4.05  | 0.02              | -63.27           | 1        | 8           | -1     | 481.893         | 6              | c1ccc(cc1)NC(=O)CN2C(=O)/C(=C/c3ccc(o3)c4ccc(cc4)C(=O)O-)]/SC2=O        |
| ZINC08439151 | 7.23  | 11.59             | -12.55           | 1        | 5           | 0      | 462.546         | 7              | CCCc1ccc(cc1)NC2=C/C(=N\S(=O))=O)c3ccc(cc3)F)/e4cccc4C2=O               |
| ZINC01012866 | 3.82  | 11.29             | -61.73           | 1        | 8           | -1     | 461.475         | 6              | Cc1ccc(cc1)c2ccc(o2)/C=C/3/C(=O)N(C(=O)S3)CC(=O)Nc4cccc4)C(=O)O-]       |
| ZINC08439150 | 7.52  | 12.2              | -14.64           | 1        | 5           | 0      | 458.583         | 7              | CCCc1ccc(cc1)NC2=C/C(=N\S(=O))=O)c3ccc(cc3)C)/e4cccc4C2=O               |
| ZINC08439149 | 1.52  | -1.47             | -19.53           | 0        | 12          | 0      | 500.489         | 7              | COc1ccc(cc1)c2ccc(cc2)[N+](=O)[O-])/C=C/3/C(=O)N(C(=O)S3)CC(=O)N4CCOCC4 |
| ZINC08439148 | 6.42  | 9.94              | -17.72           | 1        | 6           | 0      | 460.555         | 5              | Cc1cc(cc1)C)S(=O)(=O)/N=C/2/C=C(C(=O)c3c2ccc3)Nc4cccc4)C                |
| ZINC08439147 | 6.73  | 9.84              | -15.9            | 1        | 6           | 0      | 460.555         | 6              | CC(C)c1ccc(cc1)S(=O)(=O)/N=C/2/C=C(C(=O)c3c2ccc3)Nc4cccc4)C             |
| ZINC08439146 | 3.76  | 0.79              | -15.75           | 1        | 6           | 0      | 433.533         | 5              | Cc1ccc(cc1)NC(=O)CN2C(=O)/C(=C/c3ccc(o3)c4ccc(cc4)C(=O)O-)]/SC2=O       |
| ZINC08439145 | 6.4   | 10.24             | -17.26           | 1        | 6           | 0      | 468.534         | 5              | COc1ccc(cc1)NC2=C/C(=N\S(=O))=O)c3ccc4cccc4)3)/e5cccc5C2=O              |
| ZINC08439144 | 4.11  | 0.93              | -72.87           | 1        | 8           | -1     | 495.92          | 6              | Cc1cccc1NC(=O)CN2C(=O)/C(=C/c3ccc(o3)c4ccc(cc4)C(=O)O-)]/SC2=O          |
| ZINC08439143 | 6.92  | 10.25             | -15.87           | 1        | 6           | 0      | 474.582         | 6              | CC(C)C)c1ccc(cc1)S(=O)(=O)/N=C/2/C=C(C(=O)c3c2ccc3)Nc4cccc4)C           |
| ZINC08439142 | 2     | 0.36              | -21.8            | 1        | 8           | 0      | 436.493         | 4              | Cc1cccc1NC(=O)CN2C(=O)/C(=C/c3ccc4(c3)n(c(=O)m4)C)/SC2=O                |
| ZINC08439141 | 5.65  | 8.14              | -16.11           | 1        | 7           | 0      | 462.527         | 7              | CCOc1ccc(cc1)S(=O)(=O)/N=C/2/C=C(C(=O)c3c2ccc3)Nc4cccc4)C               |
| ZINC02169139 | 4.45  | 0.56              | -62.84           | 1        | 8           | -1     | 495.92          | 6              | Cc1cccc1NC(=O)CN2C(=O)/C(=C/c3ccc(o3)c4ccc(cc4)C(=O)O-)]/SC2=O          |
| ZINC08439140 | 6.13  | 9.36              | -16.2            | 1        | 6           | 0      | 446.528         | 6              | CCc1ccc(cc1)S(=O)(=O)/N=C/2/C=C(C(=O)c3c2ccc3)Nc4cccc4)C                |
| ZINC02169133 | 4.22  | 12.19             | -59.97           | 1        | 8           | -1     | 475.502         | 6              | Cc1cccc1NC(=O)CN2C(=O)/C(=C/c3ccc(o3)c4ccc(cc4)C(=O)O-)]/SC2=O          |
| ZINC08439139 | 6.42  | 10.21             | -14.14           | 1        | 6           | 0      | 460.555         | 5              | Cc1cc(cc1)C)S(=O)(=O)/N=C/2/C=C(C(=O)c3c2ccc3)Nc4cccc4)C                |
| ZINC08439138 | 6.02  | 8.58              | -14.06           | 1        | 6           | 0      | 497.37          | 5              | COc1ccc(cc1)NC2=C/C(=N\S(=O))=O)c3ccc(cc3)Br)/e4cccc4C2=O               |
| ZINC01012792 | 3.75  | -1.55             | -15.37           | 2        | 6           | 0      | 437.304         | 4              | Cc1cccc1NC(=O)CN2C(=O)/C(=C/c3ccc(o3)c4ccc(cc4)C(=O)O-)]/SC2=O          |
| ZINC08439137 | 5.89  | 8.48              | -14.21           | 1        | 6           | 0      | 452.919         | 5              | COc1ccc(cc1)NC2=C/C(=N\S(=O))=O)c3ccc(cc3)Cl)/e4cccc4C2=O               |
| ZINC08439136 | 3.71  | 1.04              | -13.61           | 1        | 6           | 0      | 433.533         | 5              | Cc1cccc1NC(=O)CN2C(=O)/C(=C/c3ccc(o3)c4ccc(cc4)C(=O)O-)]/SC2=O          |
| ZINC08439135 | 5.66  | 8.59              | -16.67           | 1        | 6           | 0      | 432.501         | 5              | Cc1ccc(cc1)S(=O)(=O)/N=C/2/C=C(C(=O)c3c2ccc3)Nc4cccc4)C                 |
| ZINC01012776 | 3.35  | 2.09              | -16.15           | 1        | 7           | 0      | 452.532         | 8              | Cc1cccc1NC(=O)CN2C(=O)/C(=C/c3ccc(o3)c4ccc(cc4)C(=O)O-)]/SC2=O          |
| ZINC08439133 | 6.83  | -1.06             | -14.95           | 0        | 4           | 0      | 461.608         | 4              | Cc1ccc(cc1)SC2=C/C(=N\S(=O))=O)c3ccc(cc3)C)/e4cccc4C2=O                 |
| ZINC01012772 | 3.71  | -1.96             | -16.76           | 2        | 7           | 0      | 538.363         | 6              | COc1ccc(cc1)O)/C=C/2/C(=O)N(C(=O)S2)CC(=O)Nc3ccc3                       |
| ZINC08439132 | 7.14  | -1.51             | -13.55           | 0        | 4           | 0      | 461.608         | 5              | Cc1ccc(cc1)SC2=C/C(=N\S(=O))=O)c3ccc(cc3)C)/e4cccc4C2=O                 |
| ZINC08439131 | 4.18  | -0.65             | -18.9            | 1        | 9           | 0      | 542.976         | 8              | COc1ccc(cc1)O2c2c(cnc2)Cl)/C=C/2/C(=O)N(C(=O)S3)CC(=O)Nc4cccc4)C        |
| ZINC08439130 | 6.46  | -1.48             | -15.02           | 0        | 4           | 0      | 447.581         | 4              | Cc1ccc(cc1)SC2=C/C(=N\S(=O))=O)c3ccc(cc3)C)/e4cccc4C2=O                 |
| ZINC08439129 | 6.06  | 11.08             | -14.45           | 0        | 5           | 0      | 463.58          | 6              | COc1ccc(cc1)S(=O)(=O)/N=C/2/C=C(C(=O)c3c2ccc3)Sc4ccc(cc4)C              |
| ZINC01012762 | 4.51  | -0.75             | -19.06           | 1        | 9           | 0      | 552.992         | 8              | COc1cccc1NC(=O)COC2ccc(cc2)/C=C/3/C(=O)N(C(=O)S3)Cc4ccc(cc4)C)OC05      |
| ZINC01012760 | 4.07  | -0.08             | -9.01            | 0        | 6           | 0      | 417.87          | 5              | CCOc1ccc(cc1)/C=C/2/C(=O)N(C(=O)S2)CC3c4c(cc3)C)OC04                    |
| ZINC08439128 | 5.69  | 10.18             | -14.55           | 0        | 5           | 0      | 449.553         | 5              | Cc1ccc(cc1)SC2=C/C(=N\S(=O))=O)c3ccc(cc3)OC)/e4cccc4C2=O                |
| ZINC0683837  | 4.82  | 11.74             | -16.67           | 0        | 7           | 0      | 490.821         | 7              | COc1ccc(cc1)OC(=O)c2ccc2)C=C3(C=NN(C3=O)c4ccc(cc4)Cl)C(F)F              |
| ZINC08439127 | 6.54  | -1.88             | -15.02           | 0        | 4           | 0      | 447.581         | 5              | CCc1ccc(cc1)S(=O)(=O)/N=C/2/C=C(C(=O)c3c2ccc3)Sc4ccc(cc4)C              |
| ZINC08439126 | 2.59  | -5.28             | -19.6            | 3        | 8           | 0      | 423.45          | 4              | Cc1ccc(cc1)N2C(=O)/C(=C/c3ccc(o3)c4ccc(cc4)S(=O)(=O)N)/C(=O)N2          |
| ZINC08439125 | 6.83  | 13.22             | -13.62           | 0        | 4           | 0      | 461.608         | 4              | Cc1ccc(cc1)SC2=C/C(=N\S(=O))=O)c3ccc(cc3)C)/e4cccc4C2=O                 |
| ZINC08439124 | 4.07  | 11.55             | -68.61           | 1        | 7           | -1     | 421.816         | 4              | Cc1ccc(cc1)N2C(=O)/C(=C/c3ccc(o3)c4ccc(cc4)S(=O)(=O)O-)]/C(=O)N2        |
| ZINC08439123 | 5.79  | 10.94             | -12.55           | 0        | 4           | 0      | 437.517         | 4              | Cc1ccc(cc1)SC2=C/C(=N\S(=O))=O)c3ccc(cc3)F)/e4cccc4C2=O                 |
| ZINC08439121 | 6.44  | -3.1              | -12.85           | 0        | 4           | 0      | 498.423         | 4              | Cc1ccc(cc1)SC2=C/C(=N\S(=O))=O)c3ccc(cc3)Br)/e4cccc4C2=O                |
| ZINC08439120 | 6.31  | 11.4              | -12.48           | 0        | 4           | 0      | 453.972         | 4              | Cc1ccc(cc1)SC2=C/C(=N\S(=O))=O)c3ccc(cc3)Cl)/e4cccc4C2=O                |
| ZINC08439119 | 5.63  | 10.88             | -15.03           | 0        | 4           | 0      | 419.527         | 4              | Cc1ccc(cc1)SC2=C/C(=N\S(=O))=O)c3ccc(cc3)/e4cccc4C2=O                   |
| ZINC08439118 | 5.91  | 12.63             | -14.7            | 0        | 5           | 0      | 445.54          | 4              | Cc1ccc(cc1)S(=O)(=O)N(c2ccc3c(c2)c4c(o3)CCCC4)C(=O)c5cccc5              |
| ZINC02168976 | 6.24  | -4.12             | -10.82           | 2        | 4           | 0      | 548.098         | 4              | Cc1cc2(cc1)C)nc([nH]2)SC(=O)Nc3ccc(cc3)Br)Br                            |
| ZINC02168967 | 2.62  | -3.43             | -21.61           | 4        | 6           | 0      | 371.462         | 9              | CCCCOc1ccc(cc1)C(=O)N(C(=O)S)Nc2ccc2C(=O)N                              |
| ZINC08439117 | 6.14  | -0.99             | -12.25           | 0        | 5           | 0      | 465.958         | 4              | c1ccc(cc1)S(=O)(=O)N(c2ccc3c(c2)c4c(o3)CCCC4)C(=O)c5ccc(cc5)Cl          |
| ZINC08439116 | 5.85  | 10.57             | -13.8            | 2        | 4           | 0      | 425.326         | 6              | CCCCC(=O)Nc1ccc(cc1)NC(=O)c2ccc3c2ccc3Br                                |
| ZINC08439115 | 5.91  | -0.64             | -13.72           | 0        | 5           | 0      | 445.54          | 4              | Cc1ccc(cc1)C(=O)N(c2ccc3c(c2)c4c(o3)CCCC4)S(=O)(=O)c5cccc5              |
| ZINC02168965 | 4.76  | -2.38             | -26.3            | 3        | 5           | 0      | 424.353         | 8              | CCCCC(=O)Nc1ccc(cc1)NC(=O)c2ccc(cc2)Cl                                  |
| ZINC08439114 | 5.47  | 2.11              | -14.9            | 0        | 7           | 0      | 491.565         | 6              | Cc1ccc(cc1)C)S(=O)(=O)N(c2ccc3c(c2)c4c(o3)CC)C(=O)OC)C(=O)c4cccc4)C     |

Supplementary Table S2:

Detailed table of XP Docking using Schrodinger's Glide module

| ZINC_ID      | xLogP | ApolarDesolvation | PolarDesolvation | H Donors | H Acceptors | Charge | MolecularWeight | RotatableBonds | SMILES                                                                                    |
|--------------|-------|-------------------|------------------|----------|-------------|--------|-----------------|----------------|-------------------------------------------------------------------------------------------|
| ZINC02168963 | 4.82  | -2.21             | -24.07           | 3        | 6           | 0      | 464.385         | 9              | CCCC(=O)Nc1cccc(c1)NC(=S)NC(=O)c2cc(ccc2)OCBr                                             |
| ZINC08439113 | 5.53  | 1.53              | -16.46           | 0        | 6           | 0      | 475.566         | 5              | Cc1cc(c(c1)C)S(=O)(=O)N(c2ccc3c(c2)j(c(o3)C)C(=O)C)C(=O)c4cccc4)C                         |
| ZINC02168962 | 5.28  | -1.58             | -26.5            | 3        | 5           | 0      | 431.561         | 9              | CCCC(=O)Nc1cccc(c1)NC(=S)NC(=O)c2ccc(cc2)c3cccc3                                          |
| ZINC08439112 | 5.85  | -1.52             | -15.75           | 0        | 5           | 0      | 451.569         | 4              | Cc1ccc(cc1)C(=O)N(c2ccc3c(c2)j(c4c(o3)CCCC4)S(=O)(=O)c5cccc5                              |
| ZINC08439111 | 7.11  | 0.56              | -13.2            | 0        | 5           | 0      | 487.621         | 4              | Cc1ccc(cc1)C(=O)N(c2ccc3c(c2)j(c4c(o3)CCCC4)S(=O)(=O)c5ccc(c(cc5)C)C                      |
| ZINC0683820  | 4.74  | -3.03             | -20.1            | 3        | 5           | 0      | 488.794         | 6              | c1cc(cc(c1)C)C(=O)Nc2ccc(cc2)NC(=S)NC(=O)c3cccc(cc3)Br                                    |
| ZINC08439110 | 6.5   | -1.79             | -11              | 1        | 5           | 0      | 441.593         | 7              | CCC(C)C)C@H)1CCc2c(c3ccc(ccc3o2)NS(=O)(=O)c4cccc(cc4)OCC)C1                               |
| ZINC0683819  | 4.04  | -1.58             | -26.5            | 3        | 5           | 0      | 427.888         | 6              | c1ccc(c(c1)C(=O)NC(=S)Nc2ccc(cc2)NC(=O)c3cccc(c3)Cl)F                                     |
| ZINC08439109 | 6.5   | -1.81             | -10.09           | 1        | 5           | 0      | 441.593         | 7              | CCC(C)C)C@H)1CCc2c(c3ccc(ccc3o2)NS(=O)(=O)c4cccc(cc4)OCC)C1                               |
| ZINC0683818  | 4.7   | -1.96             | -24.95           | 3        | 6           | 0      | 467.978         | 8              | CC(C)Oc1cccc(c1)C(=O)NC(=S)Nc2ccc(cc2)NC(=O)c3cccc(c3)Cl                                  |
| ZINC08439108 | 5.62  | -0.91             | -12.08           | 0        | 6           | 0      | 441.549         | 7              | CCCC(=O)N(c1ccc2c(c1)c3c(o2)CCCC3)S(=O)(=O)c4cccc(cc4)OCC                                 |
| ZINC0683816  | 2.09  | -3.94             | -18.41           | 2        | 6           | 0      | 420.288         | 5              | COc1ccc(cc1)OCC2c(c2)Br)/C=C/3\C(=O)NC(=S)N3                                              |
| ZINC02483513 | 4.42  | 0.57              | -16.68           | 0        | 8           | 0      | 459.52          | 9              | CCCC(=O)N(c1ccc2c(c1)c(c(o2)C)C(=O)OCC)S(=O)(=O)c3cccc(cc3)OCC                            |
| ZINC08439107 | 2.74  | 0.23              | -12.32           | 1        | 6           | 0      | 496.326         | 7              | CCOC1cc(cc(c1)OCC#C)1)/C=C/2\C(=O)NC(=S)N(C2=O)CC=C                                       |
| ZINC08439106 | 4.8   | 0.54              | -16.66           | 0        | 8           | 0      | 473.547         | 10             | CCCC(=O)N(c1ccc2c(c1)c(c(o2)C)C(=O)OCC)S(=O)(=O)c3cccc(cc3)OCC                            |
| ZINC0683809  | 4.05  | 2.97              | -21.7            | 0        | 7           | 0      | 487.35          | 9              | CCOC1cc(cc(c1)OCC)C)Br)/C=C/2\C(=O)NC(=S)N(C2=O)c3cccc3)C                                 |
| ZINC08439105 | 5.21  | 0.19              | -20.18           | 0        | 7           | 0      | 491.565         | 7              | CCOC1cc(cc(c1)S(=O)(=O)N(c2ccc3c(c2)j(c(o3)C)C(=O)C)C(=O)c4cccc4)C                        |
| ZINC08439104 | 4.7   | 11.01             | -16.13           | 0        | 8           | 0      | 493.537         | 8              | CCOC1cc(cc(c1)S(=O)(=O)N(c2ccc3c(c2)j(c(o3)C)C(=O)C)C(=O)c4cccc4                          |
| ZINC02497224 | 3.47  | -0.95             | -18.68           | 0        | 8           | 0      | 478.526         | 7              | CCOC1cc(cc(c1)S(=O)(=O)N(c2ccc3c(c2)j(c(o3)C)C(=O)C)C(=O)c4cccc4                          |
| ZINC08439102 | 7.27  | 0.02              | -9.37            | 1        | 4           | 0      | 439.621         | 5              | CCC(C)C)C@H)1CCc2c(c3ccc(ccc3o2)NS(=O)(=O)c4cccc(cc4)C)C1                                 |
| ZINC08439101 | 7.27  | 0.1               | -8.99            | 1        | 4           | 0      | 439.621         | 5              | CCC(C)C)C@H)1CCc2c(c3ccc(ccc3o2)NS(=O)(=O)c4cccc(cc4)C)C1                                 |
| ZINC0683801  | 3.48  | 2.87              | -19.34           | 0        | 7           | 0      | 473.323         | 8              | CCOC1cc(cc(c1)OCC)C)Br)/C=C/2\C(=O)NC(=S)N(C2=O)c3cccc3)C                                 |
| ZINC08439100 | 7.05  | 1.82              | -14.47           | 0        | 6           | 0      | 499.588         | 7              | Cc1cc(c(c1)C)S(=O)(=O)N(c2ccc(cc2)OC(=O)c3cccc3)C(=O)c4cccc4)C                            |
| ZINC08439099 | 5.37  | -0.52             | -11.66           | 0        | 6           | 0      | 474.582         | 4              | Cc1cc(c(c1)C)S(=O)(=O)N(c2ccc3c(c2)j(c4c(o3)CCCC4)C(=O)c5cccc5)C                          |
| ZINC08439098 | 4.61  | 3.41              | -18.86           | 0        | 5           | 0      | 430.479         | 7              | CCOC1cc(cc(c1)OCC2c(c2)F)/C=C/3\C(=O)NC(=S)N(C3=O)c4cccc4)C                               |
| ZINC08439097 | 6.38  | 0.5               | -11.06           | 0        | 5           | 0      | 439.577         | 5              | CCCC(=O)N(c1ccc2c(c1)c3c(o2)CCCC3)S(=O)(=O)c4cccc(cc4)C)C                                 |
| ZINC0683795  | 3.48  | 2.82              | -18.95           | 0        | 7           | 0      | 473.323         | 8              | CCOC(=O)COC1cc(cc(c1)OCC)C)Br)/C=C/2\C(=O)NC(=S)N(C2=O)c3cccc3)OCC                        |
| ZINC02497221 | 4.17  | 10.4              | -14.18           | 0        | 7           | 0      | 443.521         | 6              | CCOC(=O)c1cc(c2c1cc(c2)N(C(=O)C)S(=O)(=O)c3cc(cc3)C)C)C                                   |
| ZINC04198939 | 3.21  | -0.26             | -16.9            | 0        | 7           | 0      | 452.463         | 5              | Cc1c(c2cc(ccc2o1)N(C(=O)c3cccc3)S(=O)(=O)c4cccc(cc4)F)C)C                                 |
| ZINC08439096 | 5.25  | 1.51              | -17.47           | 0        | 7           | 0      | 495.528         | 7              | CCOC(=O)c1cc(c2c1cc(c2)N(C(=O)c3cccc3)S(=O)(=O)c4cccc(cc4)F)C                             |
| ZINC08439095 | 5.26  | 2.11              | -14.08           | 0        | 7           | 0      | 463.559         | 7              | CCOC(=O)C1=C(N=C2n(c1=O)c(c3cccc3)s2)C@H)14cccc(cc4)OCC)C)C                               |
| ZINC08439094 | 4.88  | 1.52              | -18.15           | 0        | 7           | 0      | 481.501         | 6              | Cc1ccc(cc1)C(=O)N(c2ccc3c(c2)j(c(o3)C)C(=O)OCC)S(=O)(=O)c4cccc(cc4)F                      |
| ZINC08439093 | 4.43  | 10.82             | -14.84           | 0        | 7           | 0      | 467.474         | 6              | Cc1c(c2cc(ccc2o1)N(C(=O)c3cccc3)S(=O)(=O)c4cccc(cc4)F)C)C)C                               |
| ZINC08439092 | 5.26  | 2.29              | -14.17           | 0        | 7           | 0      | 463.559         | 7              | CCOC(=O)C1=C(N=C2n(c1=O)c(c3cccc3)s2)C@H)14cccc(cc4)OCC)C)C                               |
| ZINC08439091 | 4.42  | 0.52              | -16.91           | 0        | 8           | 0      | 459.52          | 9              | CCCC(=O)N(c1ccc2c(c1)c(c(o2)C)C(=O)OCC)S(=O)(=O)c3cccc(cc3)OCC                            |
| ZINC08439090 | 4.7   | 0.55              | -16.13           | 0        | 8           | 0      | 493.537         | 8              | CCOC(=O)c1cc(c2c1cc(c2)N(C(=O)c3cccc3)S(=O)(=O)c4cccc(cc4)OCC                             |
| ZINC08439089 | 6.26  | -0.02             | -12.22           | 1        | 5           | 0      | 475.57          | 4              | CC1=C(C@H)(n2c1=O)/c1c(c3cccc3)/sc2=N1)e4ccc(cc4)F)C(=O)Nc5cccc5                          |
| ZINC08439088 | 4.77  | 0.8               | -20.37           | 0        | 8           | 0      | 493.537         | 7              | Cc1ccc(cc1)C(=O)N(c2ccc3c(c2)j(c(o3)C)C(=O)OCC)S(=O)(=O)c4cccc(cc4)OCC                    |
| ZINC08439087 | 4.32  | 10.06             | -16.47           | 0        | 8           | 0      | 479.51          | 7              | Cc1c(c2cc(ccc2o1)N(C(=O)c3cccc3)S(=O)(=O)c4cccc(cc4)OCC)C(=O)OCC                          |
| ZINC08439086 | 6.26  | -0.32             | -12.59           | 1        | 5           | 0      | 475.57          | 4              | CC1=C(C@H)(n2c1=O)/c1c(c3cccc3)/sc2=N1)e4ccc(cc4)F)C(=O)Nc5cccc5                          |
| ZINC08439085 | 3.33  | 8.5               | -14.76           | 0        | 9           | 0      | 489.509         | 8              | COc1ccc(cc1)S(=O)(=O)N(c2ccc(cc2)OC(=O)c3cccc3)C(=O)c4cccc4                               |
| ZINC08439084 | 8.85  | 0.21              | -28.57           | 0        | 7           | 0      | 779.737         | 8              | CCOC1cc(cc(c1)OS(=O)(=O)c2ccc(cc2)C)1)C3C4=C(C)C(C4=O)1)C)C)N(C5=C3C(=O)CC(C5)C)C)C6cccc6 |
| ZINC08439083 | 6.27  | -6.88             | -14.78           | 2        | 6           | 0      | 494.619         | 6              | COc1ccc(cc1)S(=O)(=O)Nc2ccc(c(c3c2ccc3)O)Sc4nc5cccc5s4                                    |
| ZINC0683779  | 6.4   | 2.31              | -19.57           | 0        | 4           | 0      | 497.36          | 4              | c1ccc(c(c1)COc2ccc(cc2)Br)C3C4=C(C)C(C4=O)OC5=C3C(=O)CC(C5)F                              |
| ZINC02497232 | 4.53  | -1.2              | -16.53           | 1        | 7           | 0      | 439.489         | 7              | CCOC(=O)c1cc(c2c1cc(c2)N(C(=O)c3cccc3)S(=O)(=O)c4cccc(cc4)OCC                             |
| ZINC02497229 | 4.44  | 8.19              | -21.53           | 1        | 6           | 0      | 421.474         | 4              | COc1ccc(cc1)S(=O)(=O)Nc2ccc3c4c(c3e5e2cccc5)CCCC4=O                                       |
| ZINC02497229 | 4.44  | 8.26              | -21.95           | 0        | 6           | -1     | 420.466         | 4              | COc1ccc(cc1)S(=O)(=O)Nc2ccc3c4c(c3e5e2cccc5)CCCC4=O                                       |
| ZINC02168813 | 5.34  | 4.02              | -27.29           | 0        | 4           | 0      | 496.445         | 3              | CC1(C2=C(C)C3=C(C)N2)C)C(C3)O)C)C4ccc(cc4)OCC#C)Br)C(=O)C1)C                              |
| ZINC08439082 | 5.57  | 1.64              | -13.39           | 0        | 7           | 0      | 471.575         | 8              | CCCC(=O)N(c1ccc2c(c1)c(c(o2)C)C(=O)OCC)S(=O)(=O)c3cccc(cc3)C)C                            |
| ZINC08439081 | 5.19  | 1.67              | -13.46           | 0        | 7           | 0      | 457.548         | 7              | CCCC(=O)N(c1ccc2c(c1)c(c(o2)C)C(=O)OCC)S(=O)(=O)c3cccc(cc3)C)C                            |
| ZINC08439080 | 5.98  | 1.49              | -14.96           | 0        | 6           | 0      | 489.593         | 5              | Cc1ccc(cc1)C(=O)N(c2ccc3c(c2)j(c(o3)C)C(=O)C)S(=O)(=O)c4cccc(cc4)C)C                      |
| ZINC08439079 | 5.53  | 12.45             | -17.08           | 0        | 6           | 0      | 475.566         | 5              | Cc1cc(c(c1)C)S(=O)(=O)N(c2ccc3c(c2)j(c(o3)C)C(=O)C)C(=O)c4cccc4)C                         |
| ZINC08439078 | 5.47  | 12.58             | -18.49           | 0        | 7           | 0      | 491.565         | 6              | Cc1cc(c(c1)C)S(=O)(=O)Nc2ccc3c(c2)j(c(o3)C)C(=O)OCC)C(=O)c4cccc4)C                        |
| ZINC08439077 | 6.38  | 0.1               | -11.7            | 0        | 5           | 0      | 439.577         | 5              | CCCC(=O)N(c1ccc2c(c1)c3c(o2)CCCC3)S(=O)(=O)c4cccc(cc4)C)C                                 |
| ZINC02168795 | 4.5   | 6.61              | -15.46           | 0        | 7           | 0      | 486.446         | 10             | CCOC1cc(ccc1)OCC#C)/C=C/2\C(=O)NC(=S)N(C2=O)c3cccc(cc3)C(=O)OCC)C(F)F)F                   |
| ZINC08439076 | 5.37  | -0.56             | -15.1            | 0        | 6           | 0      | 474.582         | 4              | Cc1cc(c(cc1)C)S(=O)(=O)N(c2ccc3c(c2)j(c4c(o3)CCCC4)C(=O)c5cccc5)C                         |
| ZINC08439075 | 7.7   | 0.73              | -10.46           | 0        | 5           | 0      | 531.859         | 5              | CCCN1C(=O)/C=C/c2ccc3c2cc(cc3)OCC)O)C)S/C1=N\c4cccc(c4)C)Br                               |
| ZINC08439074 | 5.99  | -1.7              | -10.92           | 0        | 5           | 0      | 476.392         | 5              | CCCC(=O)N(c1ccc2c(c1)c3c(o2)CCCC3)S(=O)(=O)c4cccc(cc4)Br                                  |
| ZINC02168759 | 5.76  | 3.6               | -16.75           | 1        | 5           | 0      | 484.547         | 6              | Cc1cc(c(c1)C)S(=O)(=O)Nc2ccc3c(c2)j(c(o3)C)C(=O)OCC)C(=O)c4cccc4)C                        |
| ZINC08439073 | 3.44  | 9.21              | -13.86           | 0        | 8           | 0      | 477.473         | 7              | c1ccc(cc1)N(C(=O)c2ccc3c2)S(=O)(=O)c3cccc3)F)OC(=O)c4cccc4                                |
| ZINC08439072 | 3.72  | -5.56             | -16.15           | 3        | 7           | 0      | 569.153         | 4              | c1ccc(cc1)N2C(=O)/C=C/c3ccc(c(c3)Br)O)Br)/C(=N2)C(F)F)F)S(=O)(=O)N                        |

Supplementary Table S2:

Detailed table of XP Docking using Schrodinger's Glide module

| ZINC_ID      | xLogP | ApolarDesolvation | PolarDesolvation | H Donors | H Acceptors | Charge | MolecularWeight | RotatableBonds | SMILES                                                                               |
|--------------|-------|-------------------|------------------|----------|-------------|--------|-----------------|----------------|--------------------------------------------------------------------------------------|
| ZINC02497236 | 4.64  | -0.47             | -15.17           | 1        | 6           | 0      | 427.453         | 6              | CCOC(=O)c1c[oe2c1cc(c3c2ccc3)NS(=O)](=O)c4ccc(cc4)FIC                                |
| ZINC08439071 | 4.92  | -1.37             | -17.77           | 2        | 7           | 0      | 530.311         | 5              | c1ccc(ccc1N2C(=O)/C(=C)c3ccc(o3)c4ccc(c1c4)C1)/C(=N2)C(F)(F)F(S(=O))(=O)N            |
| ZINC08439070 | 3.87  | 9.74              | -17              | 0        | 7           | 0      | 462.527         | 5              | Cc1ccc(c1C1)S(=O)](=O)N(c2ccc3c(c2)c(c(o3)C)C(=O)C)C(=O)c4cccnc4                     |
| ZINC00683625 | 4.86  | 3.44              | -11.12           | 1        | 7           | 0      | 482.842         | 8              | CCOC1ccc(cc1O)C1)/C=C/2/C(=NN(C2=O)c3ccc(cc3)C(=O)O)C(C)(F)F                         |
| ZINC08439069 | 5.19  | 1.33              | -13.31           | 0        | 7           | 0      | 457.548         | 8              | CCCC(=O)N(c1ccc2c(c1)c(o2)C)C(=O)OC(S(=O))(=O)c3ccc(cc3)C                            |
| ZINC08439068 | 5.49  | 0.95              | -16.62           | 0        | 7           | 0      | 491.565         | 7              | CCOC(=O)c1c2cc(ccc2oc1c3cccnc3)N(C(=O)C)S(=O)](=O)c4ccc(cc4)C                        |
| ZINC02168705 | 4.84  | 5.56              | -13.14           | 0        | 7           | 0      | 476.451         | 10             | CCOCc1ccc(cc1OC)/C=C/2/C(=NN(C2=O)c3ccc(cc3)C(=O)OC)C(F)(F)F                         |
| ZINC02483517 | 5.3   | -0.32             | -17.79           | 1        | 6           | 0      | 437.517         | 6              | CCOC(=O)c1c[oe2c1cc(c3c2ccc3)NS(=O)](=O)c4ccc(cc4)C                                  |
| ZINC08439067 | 4.62  | 8.33              | -13.49           | 1        | 7           | 0      | 513.266         | 7              | CCOC(=O)c1ccc(cc1)N2C(=O)/C(=C)c3ccc(c(c3)Br)O)OC(C(=N2)C(F)(F)F                     |
| ZINC08439066 | 4.99  | -0.85             | -14.91           | 0        | 6           | 0      | 460.555         | 4              | Cc1ccc(c1)S(=O)](=O)N(c2ccc3(c2)c4c(o3)CCCC4)C(=O)c5cccnc5)C                         |
| ZINC08439065 | 4.7   | 4.73              | -9.46            | 0        | 7           | 0      | 527.293         | 8              | CCOC(=O)c1ccc(cc1)N2C(=O)/C(=C)c3ccc(c(c3)Br)OC)OC(C(=N2)C(F)(F)F                    |
| ZINC08439064 | 4.82  | 1.34              | -13.41           | 0        | 7           | 0      | 443.521         | 7              | CCCC(=O)N(c1ccc2c(c1)c(o2)C)C(=O)OC(S(=O))(=O)c3ccc(cc3)C                            |
| ZINC15277133 | 3.96  | 9.82              | -12.18           | 0        | 7           | 0      | 448.397         | 8              | CCOC(=O)c1ccc(cc1)N2C(=O)/C(=C)c3ccc(c(c3)OC)OC(C(=N2)C(F)(F)F                       |
| ZINC08439062 | 5.19  | 1.31              | -13.26           | 0        | 7           | 0      | 457.548         | 8              | CCCC(=O)N(c1ccc2c(c1)c(o2)C)C(=O)OC(S(=O))(=O)c3ccc(cc3)C                            |
| ZINC08439061 | 5.55  | -5.88             | -32.34           | 3        | 8           | 0      | 616.79          | 13             | c1ccc(cc1)OCCNC(=O)CSc2nc3ccc(cc3s2)N(C(=O)C)SCC(=O)Nc4ccc5cccc5e4                   |
| ZINC08439060 | 5.54  | 1.51              | -14.35           | 0        | 7           | 0      | 491.565         | 6              | Cc1ccc(cc1)C(=O)N(c2ccc3(c2)c(o3)C)C(=O)OC(S(=O))(=O)c4ccc(cc4)C                     |
| ZINC08439059 | 5.47  | 11.43             | -16.85           | 0        | 7           | 0      | 491.565         | 7              | CCOC(=O)c1c[oe2c1cc(cc2)N(C(=O)c3cccnc3)S(=O)](=O)c4ccc(cc4)C                        |
| ZINC08439058 | 5.09  | 0.88              | -17.06           | 0        | 7           | 0      | 475.538         | 6              | Cc1ccc(c1)S(=O)](=O)N(c2ccc3(c2)c(c(o3)C)C(=O)OC)C(=O)c4cccnc4)C                     |
| ZINC08439056 | 5.6   | 0.93              | -16.01           | 0        | 6           | 0      | 475.538         | 5              | Cc1ccc(cc1)C(=O)N(c2ccc3(c2)c(o3)C)C(=O)C)S(=O)](=O)c4ccc(cc4)C                      |
| ZINC08439055 | 7.58  | -1.03             | -10.55           | 1        | 4           | 0      | 439.621         | 6              | CC(C)C(C)C@H1CCc2c(c3ccc(cc3o2)NS(=O))(=O)c4ccc(cc4)C(C)C1                           |
| ZINC08439054 | 4.48  | -4.27             | -26.39           | 4        | 11          | 0      | 619.754         | 11             | Cn1c(nmc1SCC(=O)Nc2ccc3c(c2)sc(n3)SCC(=O)Nc4ccc(cc4)C(=O)OC)c5ccc(cc5)N              |
| ZINC08439053 | 7.58  | -1.05             | -9.57            | 1        | 4           | 0      | 439.621         | 6              | CC(C)C(C)C@H1CCc2c(c3ccc(cc3o2)NS(=O))(=O)c4ccc(cc4)C(C)C1                           |
| ZINC02168677 | 6.87  | 0.05              | -12.03           | 0        | 7           | 0      | 551.045         | 6              | CCCC(=O)C1=C(N=c2n(c(f=O)/c=C/c3c4c(cc3C)OC)O4/s2)]C@H1c5cccnc5)C6cccc6              |
| ZINC08439052 | 6.7   | -0.15             | -11.51           | 0        | 5           | 0      | 439.577         | 6              | CCCC(=O)N(c1ccc2c(c1)c3c(O)CCCC3)S(=O)](=O)c4ccc(cc4)C(C)C                           |
| ZINC02168681 | 6.87  | 0.1               | -12.07           | 0        | 7           | 0      | 551.045         | 6              | CCCC(=O)C1=C(N=c2n(c(f=O)/c=C/c3c4c(cc3C)OC)O4/s2)]C@H1c5cccnc5)C6cccc6              |
| ZINC08439051 | 4.99  | -1.01             | -13.01           | 0        | 6           | 0      | 460.555         | 4              | Cc1ccc(c1)C)S(=O)](=O)N(c2ccc3(c2)c4c(o3)CCCC4)C(=O)c5cccnc5                         |
| ZINC08439050 | 5.44  | -1.91             | -26.67           | 2        | 11          | 0      | 648.792         | 13             | C1cccc10c2nm(c2)SCC(=O)Nc3ccc4c(c3)sc(n4)SCC(=O)Nc5ccc(cc5)C(=O)OC                   |
| ZINC08439049 | 5.46  | 1.21              | -17.15           | 0        | 7           | 0      | 491.565         | 7              | CCOC(=O)c1c[oe2c1cc(cc2)N(C(=O)c3cccnc3)S(=O)](=O)c4ccc(cc4)C                        |
| ZINC08439048 | 4.74  | -1.76             | -23.78           | 2        | 11          | 0      | 605.727         | 12             | COC(=O)c1ccc(cc1)N(C(=O)C)Sc2nc3ccc(cc3s2)N(C(=O)C)Sc4nnnn4c5cccc5                   |
| ZINC08439047 | 5.54  | 1.49              | -20.21           | 0        | 7           | 0      | 491.565         | 6              | Cc1ccc(cc1)C(=O)N(c2ccc3(c2)c(o3)C)C(=O)OC)S(=O)](=O)c4ccc(cc4)C                     |
| ZINC08439045 | 3.95  | 9.65              | -13.55           | 0        | 8           | 0      | 493.928         | 7              | c1ccc(cc1N(C(=O)c2cccnc2)S(=O))(=O)c3ccc(cc3)OC)C(=O)c4cccnc4                        |
| ZINC08439043 | 5.9   | 9.84              | -18.23           | 0        | 5           | 0      | 462.577         | 4              | c1ccc(cc1)S(=O)](=O)N=C/2/C=C(C(=O)c3c2ccc3)Sc4nc5cccc5s4                            |
| ZINC02168673 | 2.08  | -1.08             | -15.06           | 0        | 8           | 0      | 499.383         | 7              | CCOC1cc(cc1OC)Br)/C=C/2/C(=O)N(C(=O)S2)CC(=O)N3CCOC3                                 |
| ZINC08439042 | 6.73  | 11.31             | -18.94           | 0        | 5           | 0      | 490.631         | 4              | Cc1ccc(c1)S(=O)](=O)N=C/2/C=C(C(=O)c3c2ccc3)Sc4nc5cccc5s4)C                          |
| ZINC02168668 | 1.54  | -1.55             | -14.9            | 0        | 7           | 0      | 441.303         | 4              | COC1ccc(cc1Br)/C=C/2/C(=O)N(C(=O)S2)CC(=O)N3CCOC3                                    |
| ZINC08439041 | 6.73  | 11.28             | -18.47           | 0        | 5           | 0      | 490.631         | 4              | Cc1ccc(c1)C)S(=O)](=O)N=C/2/C=C(C(=O)c3c2ccc3)Sc4nc5cccc5s4                          |
| ZINC02168664 | 3.21  | -1.46             | -16.21           | 0        | 7           | 0      | 517.401         | 6              | c1ccc(cc1OC2ccc(cc2)/C=C/3/C(=O)N(C(=O)S3)CC(=O)N4CCOC4)Br                           |
| ZINC08439038 | 5.94  | 9.53              | -20.12           | 1        | 8           | 0      | 490.537         | 8              | CCOC1ccc(cc1)S(=O)](=O)N=C/2/C=C(C(=O)c3c2ccc3)Nc4cccnc4)C(=O)OC                     |
| ZINC08439037 | 6.42  | 10.75             | -20.48           | 1        | 7           | 0      | 474.538         | 7              | CCc1ccc(cc1)S(=O)](=O)N=C/2/C=C(C(=O)c3c2ccc3)Nc4cccnc4)C(=O)OC                      |
| ZINC08439036 | 6.34  | 10.76             | -21.43           | 1        | 7           | 0      | 474.538         | 6              | Cc1ccc(cc1)C)S(=O)](=O)N=C/2/C=C(C(=O)c3c2ccc3)Nc4cccnc4)C(=O)OC                     |
| ZINC02168632 | 6.42  | 2.7               | -11.99           | 1        | 5           | 0      | 486.033         | 6              | CC(C)C(C)C1ccc(cc1O)C(C)C)/C=C/2/C(=O)N(C(=O)S2)CC(=O)c3ccc(cc3)Cl                   |
| ZINC08439035 | 7.34  | 11.06             | -15              | 1        | 6           | 0      | 488.609         | 7              | CCOC1ccc(cc1)N2C=C/C(=N)S(=O)](=O)c3ccc(cc3)C(C)C)/c4cccnc4)C2=O                     |
| ZINC08439034 | 5.54  | -0.77             | -9.38            | 1        | 4           | 0      | 590.224         | 3              | Cc1ccc(cc1C)N2C(=O)/C(=C)c3ccc(cc3OC)C1)/N2C=S                                       |
| ZINC08439033 | 7.15  | 10.67             | -15.1            | 1        | 6           | 0      | 474.582         | 7              | CCOC1ccc(cc1)N2C=C/C(=N)S(=O)](=O)c3ccc(cc3)C(C)C)/c4cccnc4)C2=O                     |
| ZINC08439032 | 4.64  | -1.14             | -11.48           | 1        | 5           | 0      | 501.729         | 4              | CCOC1ccc(cc1O)C)/C=C/2/C(=O)N(C(=O)S2)c3ccc(cc3)C1                                   |
| ZINC08439031 | 6.55  | 10.16             | -15.14           | 1        | 6           | 0      | 460.555         | 7              | Cc1ccc(cc1)S(=O)](=O)N=C/2/C=C(C(=O)c3c2ccc3)Nc4cccnc4)OC                            |
| ZINC08439030 | 2.48  | 0.45              | -16.99           | 0        | 8           | 0      | 500.548         | 8              | CCOC1ccc(cc1OC2cccnc2)F)/C=C/3/C(=O)N(C(=O)S3)CC(=O)N4CCOC4                          |
| ZINC08439029 | 6.46  | 10.17             | -16.13           | 1        | 6           | 0      | 460.555         | 6              | CCOC1ccc(cc1)N2C=C/C(=N)S(=O)](=O)c3ccc(cc3)C)/c4cccnc4)C2=O                         |
| ZINC02168617 | 2.85  | -0.38             | -16              | 0        | 7           | 0      | 452.532         | 6              | Cc1ccc(cc1)COC2ccc(cc2)/C=C/3/C(=O)N(C(=O)S3)CC(=O)N4CCOC4                           |
| ZINC02168561 | 6.38  | 1.4               | -34.57           | 0        | 10          | -1     | 556.576         | 8              | CCOC(=O)C1=C(N=c2n(c(f=O)/c=C/c3ccc(cc3)O-)]N+)](=O)O-)]/s2)]C@H1c4cccnc4)OC)c5cccc5 |
| ZINC08439028 | 6.09  | 9.41              | -15.75           | 1        | 6           | 0      | 446.528         | 6              | CCOC1ccc(cc1)N2C=C/C(=N)S(=O)](=O)c3ccc(cc3)C)/c4cccnc4)C2=O                         |
| ZINC02168569 | 6.38  | 1.39              | -34.6            | 0        | 10          | -1     | 556.576         | 8              | CCOC(=O)C1=C(N=c2n(c(f=O)/c=C/c3ccc(cc3)O-)]N+)](=O)O-)]/s2)]C@H1c4cccnc4)OC)c5cccc5 |
| ZINC08439027 | 6.09  | 9.29              | -14.96           | 1        | 6           | 0      | 446.528         | 5              | Cc1ccc(cc1)C)N2C=C/C(=N)S(=O)](=O)c3ccc(cc3)OC)/c4cccnc4)C2=O                        |
| ZINC02168549 | 6.55  | 2.57              | -14.77           | 0        | 8           | 0      | 556.64          | 9              | CCOC(=O)C1=C(N=c2n(c(f=O)/c=C/c3ccc(cc3)OC)/s2)]C@H1c4cccnc4)OC)c5cccc5              |
| ZINC02168555 | 6.55  | 2.65              | -14.93           | 0        | 8           | 0      | 556.64          | 9              | CCOC(=O)C1=C(N=c2n(c(f=O)/c=C/c3ccc(cc3)OC)/s2)]C@H1c4cccnc4)OC)c5cccc5              |
| ZINC08439026 | 6.46  | 9.82              | -16.68           | 1        | 6           | 0      | 460.555         | 5              | Cc1ccc(cc1C)S(=O)](=O)N=C/2/C=C(C(=O)c3c2ccc3)Nc4ccc(cc4)OC                          |
| ZINC08439025 | 6.09  | 9.27              | -16.57           | 1        | 6           | 0      | 446.528         | 5              | Cc1ccc(cc1)S(=O)](=O)N=C/2/C=C(C(=O)c3c2ccc3)Nc4ccc(cc4)OC                           |
| ZINC02168536 | 6.55  | 2.43              | -14.22           | 0        | 8           | 0      | 556.64          | 9              | CCOC(=O)C1=C(N=c2n(c(f=O)/c=C/c3ccc(cc3)OC)/s2)]C@H1c4cccnc4)OC)c5cccc5              |
| ZINC02168541 | 6.55  | 2.65              | -14.09           | 0        | 8           | 0      | 556.64          | 9              | CCOC(=O)C1=C(N=c2n(c(f=O)/c=C/c3ccc(cc3)OC)/s2)]C@H1c4cccnc4)OC)c5cccc5              |
| ZINC08439024 | 6.97  | 10.12             | -14.99           | 1        | 6           | 0      | 474.582         | 6              | CC(C)C1ccc(cc1)S(=O)](=O)N=C/2/C=C(C(=O)c3c2ccc3)Nc4ccc(cc4)OC                       |
| ZINC01836700 | 6.66  | 1.36              | -15.28           | 1        | 7           | 0      | 535.625         | 7              | CCOC(=O)C1=C(N=c2n(c(f=O)/c=C/c3[nH]c4ccc4)S2)]C@H1c5cccnc5)OC)c6cccc6               |







Supplementary Table S2:

Detailed table of XP Docking using Schrodinger's Glide module

| ZINC_ID      | xLogP | ApolarDesolvation | PolarDesolvation | H Donors | H Acceptors | Charge | MolecularWeight | RotatableBonds | SMILES                                                                    |
|--------------|-------|-------------------|------------------|----------|-------------|--------|-----------------|----------------|---------------------------------------------------------------------------|
| ZINC08438937 | 4     | -2.69             | -67.73           | 1        | 7           | -1     | 430.484         | 6              | COc1ccccc1N2CCN(CC2)c3ccccc3NC(=O)c4cccc4C(=O)[O-]                        |
| ZINC02167870 | 6.16  | -0.2              | -52.59           | 0        | 6           | -1     | 470.741         | 4              | CN1C(=O)/C(=C/c2cc(ccc2)C)Cl1)/S/C1=N/c3ccc(c(c3)C(=O)[O-])Cl             |
| ZINC01019586 | 5.05  | -3.62             | -9.26            | 1        | 5           | 0      | 432.955         | 6              | c1ccc(cc1)Cn2c3ccc(cc3nc2C)Nc4ccc(cc4)N5CCOCC5)Cl                         |
| ZINC08438933 | 5.23  | -5.25             | -9.92            | 1        | 5           | 0      | 431.971         | 5              | Cn1c2cccnc2nc1CNe3ccc(cc3)N4CCN(CC4)c5ccc(cc5)Cl                          |
| ZINC02167834 | 4.52  | 0.65              | -57.11           | 0        | 8           | -1     | 461.903         | 6              | CN1C(=O)/C(=C/c2cc(c(c2)OC)OC)/S/C1=N/c3ccc(c(c3)C(=O)[O-])Cl             |
| ZINC02167815 | 5.68  | -0.82             | -58.86           | 0        | 6           | -1     | 480.747         | 4              | CN1C(=O)/C(=C/c2ccc(c(c2)Br)OC)/S/C1=N/c3ccc(c(c3)C(=O)[O-])Cl            |
| ZINC02167795 | 4.96  | -2.54             | -54.49           | 1        | 7           | -1     | 496.746         | 4              | CN1C(=O)/C(=C/c2cc(c(c2)Br)OC)/S/C1=N/c3ccc(c(c3)C(=O)[O-])Cl             |
| ZINC08438932 | 6.59  | -0.09             | -12.8            | 1        | 6           | 0      | 489.391         | 8              | CCc1ccc(cc1)/N=C/C2/NC(=O)/C(=C/c3ccc(c(c3)Br)OC(=O)OC)/S2                |
| ZINC02184672 | 7.08  | -0.08             | -9.85            | 1        | 4           | 0      | 420.921         | 6              | COc1ccc(cc1)C(=O)c2c(nc(s2)Nc3ccc(cc3)Cl)c4ccc4                           |
| ZINC08438931 | 5.79  | 0.87              | -13.27           | 1        | 6           | 0      | 427.913         | 6              | CCc1ccc(cc1)/N=C/C2/NC(=O)/C(=C/c3ccc(c(c3)Cl)OC(=O)OC)/S2                |
| ZINC01012452 | 4.54  | 3.96              | -18.61           | 0        | 6           | 0      | 459.292         | 8              | CCOC(=O)C0c1ccc(cc1OC)/C=C/C2/C=C(OC2=O)c3ccc(cc3)Br                      |
| ZINC00627695 | 4.48  | -0.56             | -70.88           | 2        | 6           | -1     | 428.251         | 5              | c1ccc(c(c1)C(=O)Nc2ccc2C(=O)Nc3ccc(cc3)Cl)C(=O)[O-]                       |
| ZINC02167711 | 6.57  | 14.51             | -12.07           | 0        | 7           | 0      | 497.576         | 8              | CCOC(=O)c1ccc(cc1)/N=C/C2/NC(=O)/C(=C/c3ccc3OCc4ccc4C#N)/S2)C             |
| ZINC02167711 | 6.57  | 14.92             | -11.86           | 0        | 7           | 0      | 497.576         | 8              | CCOC(=O)c1ccc(cc1)/N=C/C2/NC(=O)/C(=C/c3ccc3OCc4ccc4C#N)/S2)C             |
| ZINC00627694 | 3.31  | 12.57             | -72.32           | 1        | 7           | -1     | 442.495         | 5              | CC1ccc(cc1)N2CCN(CC2)C(=O)c3ccccc3NC(=O)c4ccc4C(=O)[O-]                   |
| ZINC08438929 | 6.47  | 2.05              | -10.55           | 0        | 7           | 0      | 481.618         | 10             | CCN(CC)c1ccc(c(c1)OC)/C=C/C2/C(=O)N/C(=N)c3ccc(cc3)C(=O)OC)/S2)C          |
| ZINC00627687 | 3.26  | 13.37             | -70.72           | 1        | 7           | -1     | 442.495         | 5              | Cc1ccccc1N2CCN(CC2)C(=O)c3ccccc3NC(=O)c4ccc4C(=O)[O-]                     |
| ZINC08438928 | 6.43  | 0.76              | -9.67            | 0        | 6           | 0      | 489.391         | 7              | CCOc1ccc(cc1)/C=C/C2/C(=O)N/C(=N)c3ccc(cc3)C(=O)OC)/S2)C)Br               |
| ZINC02167675 | 6.08  | 12.51             | -11.86           | 0        | 6           | 0      | 454.935         | 7              | CCOC(=O)c1ccc(cc1)/N=C/C2/NC(=O)/C(=C/c3ccc(c(c3)Cl)OC(=O)C)/S2)C         |
| ZINC02167675 | 6.08  | 12.04             | -12.43           | 0        | 6           | 0      | 454.935         | 7              | CCOC(=O)c1ccc(cc1)/N=C/C2/NC(=O)/C(=C/c3ccc(c(c3)Cl)OC(=O)C)/S2)C         |
| ZINC08438927 | 5.18  | -0.11             | -11.36           | 1        | 7           | 0      | 426.494         | 7              | CCOc1ccc(c1O)/C=C/C2/C(=O)N/C(=N)c3ccc(cc3)C(=O)OC)/S2)C                  |
| ZINC08438926 | 5.14  | 2.84              | -17.78           | 0        | 9           | 0      | 498.557         | 11             | CCOC(=O)C0c1ccc(cc1OC)/C=C/C2/C(=O)N/C(=N)c3ccc(cc3)C(=O)OC)/S2)C         |
| ZINC08438925 | 6.9   | 1.38              | -9.95            | 0        | 6           | 0      | 479.385         | 7              | CCOc1ccc(cc1Cl)/C=C/C2/C(=O)N/C(=N)c3ccc(cc3)C(=O)OC)/S2)C)Cl             |
| ZINC01012434 | 5.98  | 8.58              | -10.7            | 1        | 6           | 0      | 461.337         | 5              | CCOC(=O)c1ccc(cc1)/N=C/C2/NC(=O)/C(=C/c3ccc(cc3)Br)/S2)C                  |
| ZINC01012434 | 5.98  | 8.99              | -10.84           | 1        | 6           | 0      | 461.337         | 5              | CCOC(=O)c1ccc(cc1)/N=C/C2/NC(=O)/C(=C/c3ccc(cc3)Br)/S2)C                  |
| ZINC01012430 | 5.43  | 8.5               | -11.37           | 1        | 7           | 0      | 446.912         | 6              | CCOC(=O)c1ccc(cc1)/N=C/C2/NC(=O)/C(=C/c3ccc(c(c3)Cl)OC)/S2)C              |
| ZINC01012430 | 5.43  | 8.95              | -11.1            | 1        | 7           | 0      | 446.912         | 6              | CCOC(=O)c1ccc(cc1)/N=C/C2/NC(=O)/C(=C/c3ccc(c(c3)Cl)OC)/S2)C              |
| ZINC00627551 | 4.64  | -0.78             | -67.37           | 2        | 6           | -1     | 434.299         | 5              | c1ccc(c(c1)C(=O)Nc2ccc(c(c2)Cl)NC(=O)[C@@H]3CCCC[C@@H]3C(=O)[O-]          |
| ZINC00627553 | 4.64  | -0.66             | -69.29           | 2        | 6           | -1     | 434.299         | 5              | c1ccc(c(c1)C(=O)Nc2ccc(c(c2)Cl)NC(=O)[C@@H]3CCCC[C@@H]3C(=O)[O-]          |
| ZINC08438924 | 5.81  | -0.24             | -12.16           | 1        | 7           | 0      | 460.939         | 7              | CCOc1ccc(cc1O)Cl)/C=C/C2/C(=O)N/C(=N)c3ccc(cc3)C(=O)OC)/S2)C              |
| ZINC00627555 | 4.64  | -0.6              | -68.47           | 2        | 6           | -1     | 434.299         | 5              | c1ccc(c(c1)C(=O)Nc2ccc(c(c2)Cl)NC(=O)[C@@H]3CCCC[C@@H]3C(=O)[O-]          |
| ZINC01012422 | 6.77  | 13.61             | -11.39           | 0        | 6           | 0      | 464.568         | 7              | CCOC(=O)c1ccc(cc1)/N=C/C2/NC(=O)/C(=C/c3ccc(o3)S4cccc4)/S2)C              |
| ZINC01012422 | 6.77  | 13.98             | -12.32           | 0        | 6           | 0      | 464.568         | 7              | CCOC(=O)c1ccc(cc1)/N=C/C2/NC(=O)/C(=C/c3ccc(o3)S4cccc4)/S2)C              |
| ZINC00627559 | 4.64  | -0.79             | -67.11           | 2        | 6           | -1     | 434.299         | 5              | c1ccc(c(c1)C(=O)Nc2ccc(c(c2)Cl)NC(=O)[C@@H]3CCCC[C@@H]3C(=O)[O-]          |
| ZINC02167597 | 4.15  | 1.37              | -55.67           | 0        | 9           | -1     | 469.495         | 9              | CCOC(=O)c1ccc(cc1)/N=C/C2/NC(=O)/C(=C/c3ccc(c(c3)OC)OC(=O)[O-])]/S2)C     |
| ZINC00627481 | 4.04  | 13.53             | -52.6            | 1        | 7           | -1     | 474.581         | 6              | CC(C)Clccc(cc1)N2CCN(CC2)C(=O)c3ccccc3NC(=O)[C@@H]4CC=CC[C@@H]4C(=O)[O-]  |
| ZINC08438923 | 4.69  | 11.08             | -17.21           | 0        | 8           | 0      | 451.504         | 8              | CCOC(=O)c1ccc(cc1)/N=C/C2/NC(=O)/C(=C/c3ccc(c(c3)OC)OC(=O)N)/S2)C         |
| ZINC08438923 | 4.69  | 10.62             | -18.28           | 0        | 8           | 0      | 451.504         | 8              | CCOC(=O)c1ccc(cc1)/N=C/C2/NC(=O)/C(=C/c3ccc(c(c3)OC)OC(=O)N)/S2)C         |
| ZINC00627482 | 4.04  | 13.37             | -68.54           | 1        | 7           | -1     | 474.581         | 6              | CC(C)Clccc(cc1)N2CCN(CC2)C(=O)c3ccccc3NC(=O)[C@@H]4CC=CC[C@@H]4C(=O)[O-]  |
| ZINC00627488 | 4.04  | 13.78             | -58.3            | 1        | 7           | -1     | 474.581         | 6              | CC(C)Clccc(cc1)N2CCN(CC2)C(=O)c3ccccc3NC(=O)[C@@H]4CC=CC[C@@H]4C(=O)[O-]  |
| ZINC02167569 | 4.92  | 0.83              | -42.18           | 0        | 9           | -1     | 426.43          | 6              | CCOC(=O)c1ccc(cc1)/N=C/C2/NC(=O)/C(=C/c3ccc(c(c3)N)=[O-])]/S2)C           |
| ZINC00627492 | 4.04  | 13.5              | -60.23           | 1        | 7           | -1     | 474.581         | 6              | CC(C)Clccc(cc1)N2CCN(CC2)C(=O)c3ccccc3NC(=O)[C@@H]4CC=CC[C@@H]4C(=O)[O-]  |
| ZINC02167561 | 6.38  | 9.13              | -9.75            | 1        | 6           | 0      | 495.782         | 5              | CCOC(=O)c1ccc(cc1)/N=C/C2/NC(=O)/C(=C/c3ccc(cc3)OC)Br)/S2)C               |
| ZINC02167561 | 6.38  | 9.54              | -9.6             | 1        | 6           | 0      | 495.782         | 5              | CCOC(=O)c1ccc(cc1)/N=C/C2/NC(=O)/C(=C/c3ccc(cc3)OC)Br)/S2)C               |
| ZINC02167561 | 6.38  | 10.32             | -35.63           | 0        | 6           | -1     | 494.774         | 5              | CCOC(=O)c1ccc(cc1)/N=C/C2/NC(=O)/C(=C/c3ccc(cc3)O)Br)/S2)C                |
| ZINC02167561 | 6.38  | 9.9               | -34.21           | 0        | 6           | -1     | 494.774         | 5              | CCOC(=O)c1ccc(cc1)/N=C/C2/NC(=O)/C(=C/c3ccc(cc3)O)Br)/S2)C                |
| ZINC08438922 | 5.06  | 2.89              | -18.17           | 0        | 8           | 0      | 465.531         | 9              | CCOc1ccc(cc1OC)N/C=C/C2/C(=O)N/C(=N)c3ccc(cc3)C(=O)OC)/S2)C               |
| ZINC08438921 | 5.28  | 1.78              | -12              | 0        | 7           | 0      | 440.521         | 8              | CCOc1ccc(cc1OC)/C=C/C2/C(=O)N/C(=N)c3ccc(cc3)C(=O)OC)/S2)C                |
| ZINC08438919 | 6.54  | 3.77              | -10.66           | 0        | 6           | 0      | 473.598         | 5              | Cc1ccc(c(c1)N2c2c(cc2)C)/C=C/C3/C(=O)N/C(=N)c4ccc(cc4)C(=O)OC)/S3)C       |
| ZINC08438918 | 6.42  | 3.3               | -10.74           | 0        | 6           | 0      | 473.598         | 6              | CCc1ccc(c1)n2c(cc2)C)/C=C/C3/C(=O)N/C(=N)c4ccc(cc4)C(=O)OC)/S3)C          |
| ZINC08438917 | 5.67  | 3.56              | -11.39           | 0        | 6           | 0      | 463.534         | 5              | Cc1ccc(c(c1)n2c(cc2)F)C)/C=C/C3/C(=O)N/C(=N)c4ccc(cc4)C(=O)OC)/S3)C       |
| ZINC08438916 | 6.12  | 3.45              | -10.95           | 0        | 6           | 0      | 459.571         | 5              | CC1cccc1n2c(cc2)C)/C=C/C3/C(=O)N/C(=N)c4ccc(cc4)C(=O)OC)/S3)C             |
| ZINC08438914 | 5.61  | 2.79              | -11.64           | 0        | 7           | 0      | 488.613         | 6              | Cc1ccc(c(c1)n2c(cc2)N)C)C)/C=C/C3/C(=O)N/C(=N)c4ccc(cc4)C(=O)OC)/S3)C     |
| ZINC08438913 | 5.57  | 2.83              | -11.97           | 0        | 7           | 0      | 475.57          | 6              | Cc1ccc(c(c1)n2c(cc2)OC)C)/C=C/C3/C(=O)N/C(=N)c4ccc(cc4)C(=O)OC)/S3)C      |
| ZINC08438912 | 6.14  | 3.14              | -11.11           | 0        | 6           | 0      | 459.571         | 5              | Cc1cccc(c1)n2c(cc2)C)/C=C/C3/C(=O)N/C(=N)c4ccc(cc4)C(=O)OC)/S3)C          |
| ZINC00627464 | 2.98  | 12.28             | -52.89           | 1        | 6           | -1     | 446.527         | 5              | CC1ccc(cc1)N2CCN(CC2)C(=O)c3ccccc3NC(=O)[C@@H]4CC=CC[C@@H]4C(=O)[O-]      |
| ZINC08438911 | 5.84  | 3.66              | -13.1            | 0        | 6           | 0      | 463.534         | 5              | Cc1ccc(c(c1)n2c(cc2)F)C)/C=C/C3/C(=O)N/C(=N)c4ccc(cc4)C(=O)OC)/S3)C       |
| ZINC00627467 | 2.98  | 12.12             | -68.81           | 1        | 7           | -1     | 446.527         | 5              | Cc1ccc(cc1)N2CCN(CC2)C(=O)c3ccccc3NC(=O)[C@@H]4CC=CC[C@@H]4C(=O)[O-]      |
| ZINC08438910 | 5.66  | 2.84              | -19.73           | 0        | 9           | 0      | 490.541         | 6              | CCc1ccc(c(c1)n2c(cc2)N)=[O-])]/C=C/C3/C(=O)N/C(=N)c4ccc(cc4)C(=O)OC)/S3)C |
| ZINC08438909 | 4.76  | 2.93              | -18.38           | 0        | 9           | 0      | 484.53          | 10             | CCOc1ccc(cc1OC(=O)OC)/C=C/C2/C(=O)N/C(=N)c3ccc(cc3)C(=O)OC)/S2)C          |
| ZINC00627468 | 2.98  | 12.53             | -58.55           | 1        | 7           | -1     | 446.527         | 5              | Cc1ccc(cc1)N2CCN(CC2)C(=O)c3ccccc3NC(=O)[C@@H]4CC=CC[C@@H]4C(=O)[O-]      |

**Supplementary Table S2:**  
**Detailed table of XP Docking using Schrodinger's Glide module**

| ZINC_ID      | xLogP | ApolarDesolvation | PolarDesolvation | H Donors | H Acceptors | Charge | MolecularWeight | RotatableBonds | SMILES                                                              |
|--------------|-------|-------------------|------------------|----------|-------------|--------|-----------------|----------------|---------------------------------------------------------------------|
| ZINC00627471 | 2.98  | 12.25             | -60.56           | 1        | 7           | -1     | 446.527         | 5              | Cc1ccc(cc1)N2CCN(CC2)C(=O)c3ccccc3NC(=O)C@H4CC=CC[C@H]4C(=O)O-1     |
| ZINC01012358 | 6.19  | 3.09              | -12.39           | 0        | 7           | 0      | 483.549         | 7              | CN1C(=O)/C(=C/c2ccccc2OC3c3ccc3C#N)/S/C1=N/c4ccc(cc4)C(=O)OC        |
| ZINC08438908 | 6.09  | 2.08              | -10.65           | 0        | 7           | 0      | 467.591         | 9              | CCN(C)C1ccc(c1)OCC/C=C\2/C(=O)N/C(=N/c3ccc(cc3)C(=O)OC)/S2C         |
| ZINC00627452 | 2.96  | 12.27             | -52.99           | 1        | 7           | -1     | 446.527         | 5              | Cc1cccc(c1)N2CCN(CC2)C(=O)c3ccccc3NC(=O)C@H4CC=CC[C@H]4C(=O)O-1     |
| ZINC00627455 | 2.96  | 12.11             | -68.88           | 1        | 7           | -1     | 446.527         | 5              | Cc1cccc(c1)N2CCN(CC2)C(=O)c3ccccc3NC(=O)C@H4CC=CC[C@H]4C(=O)O-1     |
| ZINC08438907 | 6.52  | 3.68              | -10.82           | 0        | 6           | 0      | 473.598         | 5              | Cc1cccc(c1)N2C(c(cc2C)/C=C\3/C(=O)N/C(=N/c4ccc(cc4)C(=O)OC)/S3)C    |
| ZINC00627458 | 2.96  | 12.52             | -58.57           | 1        | 7           | -1     | 446.527         | 5              | Cc1cccc(c1)N2CCN(CC2)C(=O)c3ccccc3NC(=O)C@H4CC=CC[C@H]4C(=O)O-1     |
| ZINC08438906 | 6.05  | 0.79              | -9.94            | 0        | 6           | 0      | 475.364         | 6              | CCOc1ccc(cc1)/C=C\2/C(=O)N/C(=N/c3ccc(cc3)C(=O)OC)/S2C)Br           |
| ZINC00627460 | 2.96  | 12.24             | -60.63           | 1        | 7           | -1     | 446.527         | 5              | Cc1cccc(c1)N2CCN(CC2)C(=O)c3ccccc3NC(=O)C@H4CC=CC[C@H]4C(=O)O-1     |
| ZINC01012347 | 5.52  | 2.42              | -16.77           | 0        | 9           | 0      | 462.487         | 6              | CN1C(=O)/C(=C/c2cccn2c3ccc(c3)N+)[=O]O-1/S/C1=N/c4ccc(cc4)C(=O)OC   |
| ZINC00627441 | 2.93  | 13.17             | -52.98           | 1        | 7           | -1     | 446.527         | 5              | Cc1cccc1N2CCN(CC2)C(=O)c3ccccc3NC(=O)C@H4CC=CC[C@H]4C(=O)O-1        |
| ZINC02167345 | 5.97  | 2.28              | -12.42           | 0        | 7           | 0      | 472.95          | 8              | CN1C(=O)/C(=C/c2ccc(c(c2)C)OCC=C)OC/S/C1=N/c3ccc(cc3)C(=O)OC        |
| ZINC00627444 | 2.93  | 12.93             | -67.16           | 1        | 7           | -1     | 446.527         | 5              | Cc1cccc1N2CCN(CC2)C(=O)c3ccccc3NC(=O)C@H4CC=CC[C@H]4C(=O)O-1        |
| ZINC01012339 | 5.61  | -1.13             | -10.8            | 1        | 6           | 0      | 447.31          | 4              | CN1C(=O)/C(=C/c2ccc(cc2)Br)/S/C1=N/c3ccc(cc3)C(=O)OC                |
| ZINC00627446 | 2.93  | 13.32             | -57.34           | 1        | 7           | -1     | 446.527         | 5              | Cc1cccc1N2CCN(CC2)C(=O)c3ccccc3NC(=O)C@H4CC=CC[C@H]4C(=O)O-1        |
| ZINC01012331 | 6.39  | 1.2               | -12.27           | 0        | 6           | 0      | 450.541         | 6              | CN1C(=O)/C(=C/c2ccc(o2)Sc3ccc(c3)/S/C1=N/c4ccc(cc4)C(=O)OC          |
| ZINC00627449 | 2.93  | 12.74             | -61.08           | 1        | 7           | -1     | 446.527         | 5              | Cc1cccc1N2CCN(CC2)C(=O)c3ccccc3NC(=O)C@H4CC=CC[C@H]4C(=O)O-1        |
| ZINC02167297 | 3.77  | 1.4               | -55.99           | 0        | 9           | -1     | 455.468         | 8              | CN1C(=O)/C(=C/c2ccc(c(c2)O)CC(=O)O-1)/S/C1=N/c3ccc(cc3)C(=O)OC      |
| ZINC08438905 | 5.49  | 2.94              | -14.1            | 0        | 7           | 0      | 470.934         | 7              | CN1C(=O)/C(=C/c2ccc(c(c2)C)OCC#C)OC/S/C1=N/c3ccc(cc3)C(=O)OC        |
| ZINC02167279 | 6.31  | 2.52              | -11.97           | 0        | 6           | 0      | 475.353         | 6              | CN1C(=O)/C(=C/c2ccc(c(c2)C)OCC#C)OC/S/C1=N/c3ccc(cc3)C(=O)OC        |
| ZINC01019550 | 4.13  | 10.67             | -53.94           | 2        | 6           | -1     | 432.283         | 5              | c1ccc(c1)C(=O)Nc2ccc(c2)C)N(C)C(=O)C@H3CC=CC[C@H]3C(=O)O-1          |
| ZINC01019551 | 4.13  | 10.8              | -63.84           | 2        | 6           | -1     | 432.283         | 5              | c1ccc(c1)C(=O)Nc2ccc(c2)C)N(C)C(=O)C@H3CC=CC[C@H]3C(=O)O-1          |
| ZINC08438903 | 4.13  | 11.17             | -57.77           | 2        | 6           | -1     | 432.283         | 5              | c1ccc(c1)C(=O)Nc2ccc(c2)C)N(C)C(=O)C@H3CC=CC[C@H]3C(=O)O-1          |
| ZINC02167211 | 5.68  | -0.92             | -55.82           | 0        | 6           | -1     | 480.747         | 4              | CN1C(=O)/C(=C/c2ccc(cc2)Br)/S/C1=N/c3ccc(cc3)C(=O)O-1)Cl            |
| ZINC01019553 | 4.13  | 11.12             | -53.06           | 2        | 6           | -1     | 432.283         | 5              | c1ccc(c1)C(=O)Nc2ccc(c2)C)N(C)C(=O)C@H3CC=CC[C@H]3C(=O)O-1          |
| ZINC08438901 | 3.19  | 12.02             | -64.1            | 1        | 7           | -1     | 452.506         | 5              | c1ccc(c1)C(=O)N2CCN(CC2)c3ccc(cc3)F)N(C)C(=O)C@H4CCCC[C@H]4C(=O)O-1 |
| ZINC08438900 | 3.19  | 11.61             | -65.38           | 1        | 7           | -1     | 452.506         | 5              | c1ccc(c1)C(=O)N2CCN(CC2)c3ccc(cc3)F)N(C)C(=O)C@H4CCCC[C@H]4C(=O)O-1 |
| ZINC00627368 | 3.19  | 12.26             | -65.01           | 1        | 7           | -1     | 452.506         | 5              | c1ccc(c1)C(=O)N2CCN(CC2)c3ccc(cc3)F)N(C)C(=O)C@H4CCCC[C@H]4C(=O)O-1 |
| ZINC08438899 | 3.19  | 11.41             | -62.77           | 1        | 7           | -1     | 452.506         | 5              | c1ccc(c1)C(=O)N2CCN(CC2)c3ccc(cc3)F)N(C)C(=O)C@H4CCCC[C@H]4C(=O)O-1 |
| ZINC00627359 | 3.03  | 11.72             | -61.8            | 1        | 8           | -1     | 464.542         | 6              | CCOc1cccc1N2CCN(CC2)C(=O)c3ccccc3NC(=O)C@H4CCCC[C@H]4C(=O)O-1       |
| ZINC08438898 | 4.76  | 11.84             | -17.36           | 0        | 9           | 0      | 484.53          | 10             | CCOC(=O)c1ccc(cc1)/N=C\2/N(C(=O)/C(=C/c3ccc(cc3)O)OC(=O)OC)/S2C     |
| ZINC08438898 | 4.76  | 11.38             | -18.17           | 0        | 9           | 0      | 484.53          | 10             | CCOC(=O)c1ccc(cc1)/N=C\2/N(C(=O)/C(=C/c3ccc(cc3)O)OC(=O)OC)/S2C     |
| ZINC00627361 | 3.03  | 11.31             | -69.72           | 1        | 8           | -1     | 464.542         | 6              | CCOc1cccc1N2CCN(CC2)C(=O)c3ccccc3NC(=O)C@H4CCCC[C@H]4C(=O)O-1       |
| ZINC00627363 | 3.03  | 11.96             | -63.14           | 1        | 8           | -1     | 464.542         | 6              | CCOc1cccc1N2CCN(CC2)C(=O)c3ccccc3NC(=O)C@H4CCCC[C@H]4C(=O)O-1       |
| ZINC08438897 | 5.32  | 0.5               | -50.04           | 0        | 7           | -1     | 439.513         | 9              | CCCN1C(=O)/C(=C/c2ccc(cc2)OCC(=O)O-1)/S1=Nc3ccc(cc3)OCC             |
| ZINC00627365 | 3.03  | 11.11             | -67.68           | 1        | 8           | -1     | 464.542         | 6              | CCOc1cccc1N2CCN(CC2)C(=O)c3ccccc3NC(=O)C@H4CCCC[C@H]4C(=O)O-1       |
| ZINC00627348 | 3.47  | 12.62             | -60.07           | 1        | 7           | -1     | 448.543         | 5              | Cc1ccc(cc1)N2CCN(CC2)C(=O)c3ccccc3NC(=O)C@H4CCCC[C@H]4C(=O)O-1      |
| ZINC00627350 | 3.47  | 12.18             | -68.98           | 1        | 7           | -1     | 448.543         | 5              | Cc1ccc(cc1)N2CCN(CC2)C(=O)c3ccccc3NC(=O)C@H4CCCC[C@H]4C(=O)O-1      |
| ZINC08438894 | 5.69  | -0.16             | -41.99           | 0        | 8           | -1     | 426.474         | 7              | CCCN1C(=O)/C(=C/c2ccc(cc2)N+)[=O]O-1)/S1=Nc3ccc(cc3)OCC             |
| ZINC00627353 | 3.47  | 12.84             | -61.66           | 1        | 7           | -1     | 448.543         | 5              | Cc1ccc(cc1)N2CCN(CC2)C(=O)c3ccccc3NC(=O)C@H4CCCC[C@H]4C(=O)O-1      |
| ZINC00627356 | 3.47  | 11.98             | -67.05           | 1        | 7           | -1     | 448.543         | 5              | Cc1ccc(cc1)N2CCN(CC2)C(=O)c3ccccc3NC(=O)C@H4CCCC[C@H]4C(=O)O-1      |
| ZINC00627339 | 3.45  | 12.61             | -60.08           | 1        | 7           | -1     | 448.543         | 5              | Cc1cccc(c1)N2CCN(CC2)C(=O)c3ccccc3NC(=O)C@H4CCCC[C@H]4C(=O)O-1      |
| ZINC00627341 | 3.45  | 12.17             | -69.08           | 1        | 7           | -1     | 448.543         | 5              | Cc1cccc(c1)N2CCN(CC2)C(=O)c3ccccc3NC(=O)C@H4CCCC[C@H]4C(=O)O-1      |
| ZINC00627343 | 3.45  | 12.84             | -61.66           | 1        | 7           | -1     | 448.543         | 5              | Cc1cccc(c1)N2CCN(CC2)C(=O)c3ccccc3NC(=O)C@H4CCCC[C@H]4C(=O)O-1      |
| ZINC00627346 | 3.45  | 11.97             | -67.11           | 1        | 7           | -1     | 448.543         | 5              | Cc1cccc(c1)N2CCN(CC2)C(=O)c3ccccc3NC(=O)C@H4CCCC[C@H]4C(=O)O-1      |
| ZINC08438888 | 3.86  | 10.93             | -61.71           | 1        | 6           | -1     | 419.288         | 5              | c1ccc(cc1)N2CCN(CC2)C(=O)c3ccccc3NC(=O)C@H4CCCC[C@H]4C(=O)O-1       |
| ZINC08438886 | 3.83  | -4.03             | -66.68           | 1        | 6           | -1     | 419.288         | 5              | c1ccc(cc1)N2CCN(CC2)C(=O)c3ccccc3NC(=O)C@H4CCCC[C@H]4C(=O)O-1       |
| ZINC08438884 | 3.57  | 3.79              | -14.58           | 0        | 5           | 0      | 253.261         | 3              | Cc1ccc(cc1)C(=O)O1n2c3ccccc3n2                                      |
| ZINC00627177 | 5.47  | -3.87             | -66.41           | 1        | 6           | -1     | 475.396         | 5              | c1ccc(c1)C1)C1)N2CCN(CC2)c3ccc(cc3)N(C)C(=O)C@H4CCCC[C@H]4C(=O)O-1  |
| ZINC00627180 | 5.47  | -3.7              | -65.44           | 1        | 6           | -1     | 475.396         | 5              | c1ccc(c1)C1)C1)N2CCN(CC2)c3ccc(cc3)N(C)C(=O)C@H4CCCC[C@H]4C(=O)O-1  |
| ZINC00627181 | 5.47  | -3.68             | -64.41           | 1        | 6           | -1     | 475.396         | 5              | c1ccc(c1)C1)C1)N2CCN(CC2)c3ccc(cc3)N(C)C(=O)C@H4CCCC[C@H]4C(=O)O-1  |
| ZINC00627184 | 5.47  | -3.88             | -64.91           | 1        | 6           | -1     | 475.396         | 5              | c1ccc(c1)C1)C1)N2CCN(CC2)c3ccc(cc3)N(C)C(=O)C@H4CCCC[C@H]4C(=O)O-1  |
| ZINC08438879 | 4.88  | -4.28             | -64.03           | 1        | 6           | -1     | 440.951         | 5              | c1ccc(cc1)N(C)C(=O)C@H2CCCC[C@H]2C(=O)O-1)N3CCN(CC3)c4ccc(cc4)Cl    |
| ZINC02166906 | 6.83  | 2.32              | -10.84           | 0        | 6           | 0      | 483.593         | 8              | CCN1C(=O)/C(=C/c2ccccc2OC3c3ccc3C#N)/S/C1=N/c4ccc(cc4)OCC           |
| ZINC08438878 | 4.88  | -4.1              | -62.67           | 1        | 6           | -1     | 440.951         | 5              | c1ccc(cc1)N(C)C(=O)C@H2CCCC[C@H]2C(=O)O-1)N3CCN(CC3)c4ccc(cc4)Cl    |
| ZINC08438876 | 4.88  | -4.09             | -62.64           | 1        | 6           | -1     | 440.951         | 5              | c1ccc(cc1)N(C)C(=O)C@H2CCCC[C@H]2C(=O)O-1)N3CCN(CC3)c4ccc(cc4)Cl    |
| ZINC01012227 | 6.31  | 0.01              | -8.93            | 0        | 5           | 0      | 461.381         | 6              | CCN1C(=O)/C(=C/c2ccc(cc2)Br)/S/C1=N/c3ccc(cc3)OCC                   |
| ZINC08438875 | 4.88  | -4.28             | -64.25           | 1        | 6           | -1     | 440.951         | 5              | c1ccc(cc1)N(C)C(=O)C@H2CCCC[C@H]2C(=O)O-1)N3CCN(CC3)c4ccc(cc4)Cl    |
| ZINC02166882 | 7.37  | 1.16              | -10.3            | 0        | 5           | 0      | 452.963         | 6              | CCN1C(=O)/C(=C/c2ccc(o2)c3ccc(cc3)Cl)/S/C1=N/c4ccc(cc4)OCC          |
| ZINC01012211 | 6.16  | 1.56              | -14.87           | 0        | 8           | 0      | 462.531         | 7              | CCN1C(=O)/C(=C/c2cccn2c3ccc(c3)N+)[=O]O-1)/S/C1=N/c4ccc(cc4)OCC     |
| ZINC00627106 | 4.97  | -3.66             | -49.87           | 1        | 6           | -1     | 473.38          | 5              | c1ccc(c1)C1)C1)N2CCN(CC2)c3ccc(cc3)N(C)C(=O)C@H4CC=CC[C@H]4C(=O)O-1 |

Supplementary Table S2:

Detailed table of XP Docking using Schrodinger's Glide module

| ZINC_ID      | xLogP | ApolarDesolvation | PolarDesolvation | H Donors | H Acceptors | Charge | MolecularWeight | RotatableBonds | SMILES                                                                    |
|--------------|-------|-------------------|------------------|----------|-------------|--------|-----------------|----------------|---------------------------------------------------------------------------|
| ZINC00627108 | 4.97  | -3.53             | -63.15           | 1        | 6           | -1     | 473.38          | 5              | c1ccc(c(c1)C1)N2CCN(CC2)C3ccc(cc3)NC(=O)C@H4CC=CC[C@H]4C(=O)O-1           |
| ZINC00627111 | 4.97  | -3.55             | -63.97           | 1        | 6           | -1     | 473.38          | 5              | c1ccc(c(c1)C1)N2CCN(CC2)C3ccc(cc3)NC(=O)C@H4CC=CC[C@H]4C(=O)O-1           |
| ZINC00627114 | 4.97  | -3.61             | -49.39           | 1        | 6           | -1     | 473.38          | 5              | c1ccc(c(c1)C1)N2CCN(CC2)C3ccc(cc3)NC(=O)C@H4CC=CC[C@H]4C(=O)O-1           |
| ZINC08438868 | 5.21  | 0.68              | -56.62           | 0        | 8           | -1     | 489.957         | 9              | CCN1C(=O)/C(=C/c2ccc(c(c2)C1)OCC(=O)O-)]OCC)/S(=O)(=O)N3C3ccc(cc3)OCC     |
| ZINC08438867 | 4.39  | -4.06             | -48.46           | 1        | 6           | -1     | 438.935         | 5              | c1ccc(ccc1)NC(=O)C@H2CC=CC[C@H]2C(=O)O-]]N3CCN(CC3)C4ccc(cc4)Cl           |
| ZINC08438866 | 6.99  | 1.5               | -10.31           | 0        | 6           | 0      | 487.021         | 10             | CCN1C(=O)/C(=C/c2ccc(c(c2)C1)OCC(=O)OCC)/S(=O)(=O)N3C3ccc(cc3)OCC         |
| ZINC08438865 | 4.39  | -3.93             | -62.53           | 1        | 6           | -1     | 438.935         | 5              | c1ccc(ccc1)NC(=O)C@H2CC=CC[C@H]2C(=O)O-]]N3CCN(CC3)C4ccc(cc4)Cl           |
| ZINC01011974 | 6.24  | -1.97             | -9.28            | 1        | 5           | 0      | 447.354         | 5              | CCN1C(=O)/C(=C/c2ccc(ccc2)Br)/S(=O)(=O)N3C3ccc(cc3)OCC                    |
| ZINC08438864 | 4.39  | -3.95             | -62.29           | 1        | 6           | -1     | 438.935         | 5              | c1ccc(ccc1)NC(=O)C@H2CC=CC[C@H]2C(=O)O-]]N3CCN(CC3)C4ccc(cc4)Cl           |
| ZINC01011970 | 6.07  | -0.99             | -10.53           | 1        | 6           | 0      | 446.956         | 7              | CCN1C(=O)/C(=C/c2ccc(ccc2)Br)/S(=O)(=O)N3C3ccc(cc3)OCC                    |
| ZINC08438863 | 4.39  | -4                | -48.31           | 1        | 6           | -1     | 438.935         | 5              | c1ccc(ccc1)NC(=O)C@H2CC=CC[C@H]2C(=O)O-]]N3CCN(CC3)C4ccc(cc4)Cl           |
| ZINC00627094 | 4.37  | -4.06             | -48.49           | 1        | 6           | -1     | 438.935         | 5              | c1ccc(ccc1)C1N2CCN(CC2)C3ccc(cc3)NC(=O)C@H4CC=CC[C@H]4C(=O)O-1            |
| ZINC02166766 | 7.03  | 0.52              | -9.84            | 0        | 5           | 0      | 450.585         | 7              | CCN1C(=O)/C(=C/c2ccc(o2)Sc3cccc3)/S(=O)(=O)N3C3ccc(cc3)OCC                |
| ZINC00627096 | 4.37  | -3.95             | -63.19           | 1        | 6           | -1     | 438.935         | 5              | c1ccc(ccc1)C1N2CCN(CC2)C3ccc(cc3)NC(=O)C@H4CC=CC[C@H]4C(=O)O-1            |
| ZINC00627097 | 4.37  | -3.95             | -63.34           | 1        | 6           | -1     | 438.935         | 5              | c1ccc(ccc1)C1N2CCN(CC2)C3ccc(cc3)NC(=O)C@H4CC=CC[C@H]4C(=O)O-1            |
| ZINC00627098 | 4.37  | -4                | -48.66           | 1        | 6           | -1     | 438.935         | 5              | c1ccc(ccc1)C1N2CCN(CC2)C3ccc(cc3)NC(=O)C@H4CC=CC[C@H]4C(=O)O-1            |
| ZINC08438861 | 4.41  | 0.69              | -54.71           | 0        | 8           | -1     | 455.512         | 9              | CCN1C(=O)/C(=C/c2ccc(c(c2)O)OCC(=O)O-)]/S(=O)(=O)N3C3ccc(cc3)OCC          |
| ZINC00627061 | 5.33  | -4.2              | -65.69           | 1        | 6           | -1     | 469.348         | 5              | c1ccc(c(c1)C(=O)Nc2ccc(cc2)N3CCN(CC3)C4ccc(cc4)C)C(=O)O-1                 |
| ZINC00627058 | 5.3   | -3.66             | -66.39           | 1        | 6           | -1     | 469.348         | 5              | c1ccc(c(c1)C(=O)Nc2ccc(cc2)N3CCN(CC3)C4ccc(cc4)C)C(=O)O-1                 |
| ZINC00627056 | 4.72  | -4.07             | -64.79           | 1        | 6           | -1     | 434.903         | 5              | c1ccc(c(c1)C(=O)Nc2ccc(cc2)N3CCN(CC3)C4ccc(cc4)C)C(=O)O-1                 |
| ZINC02166692 | 6.83  | 1.07              | -11.29           | 0        | 5           | 0      | 442.968         | 8              | CCN1C(=O)/C(=C/c2ccc(c(c2)C1)OCC(=O)S(=O)(=O)N3C3ccc(cc3)OCC              |
| ZINC00627054 | 4.7   | -4.06             | -66.44           | 1        | 6           | -1     | 434.903         | 5              | c1ccc(c(c1)C(=O)Nc2ccc(cc2)N3CCN(CC3)C4ccc(cc4)C)C(=O)O-1                 |
| ZINC01011938 | 5.77  | 0.92              | -8.99            | 0        | 6           | 0      | 446.956         | 7              | CCN1C(=O)/C(=C/c2ccc(c(c2)C1)O)OCC(=O)S(=O)(=O)N3C3ccc(cc3)OCC            |
| ZINC08438858 | 3.61  | -1.34             | -79.55           | 2        | 6           | 0      | 441.531         | 7              | c1ccc(cc1)C1NH+12CCN(CC2)C3ccc(cc3)NC(=O)C(=O)C4CCCC4/C(=O)O-1            |
| ZINC08438856 | 4.07  | -2.94             | -51.99           | 1        | 6           | -1     | 444.486         | 6              | c1ccc(cc1)/C(=C/C(=O)Nc2ccc(cc2)N3CCN(CC3)C4ccc(cc4)F)C(=O)O-1            |
| ZINC08438854 | 5.17  | -3.42             | -53.1            | 1        | 6           | -1     | 495.386         | 6              | c1ccc(cc1)/C(=C/C(=O)Nc2ccc(cc2)N3CCN(CC3)C4ccc(cc4)C)C(=O)O-1            |
| ZINC08438852 | 4.59  | -3.82             | -51.45           | 1        | 6           | -1     | 460.941         | 6              | c1ccc(cc1)/C(=C/C(=O)Nc2ccc(cc2)N3CCN(CC3)C4ccc(cc4)C)C(=O)O-1            |
| ZINC08438850 | 4.56  | -3.82             | -51.88           | 1        | 6           | -1     | 460.941         | 6              | c1ccc(cc1)/C(=C/C(=O)Nc2ccc(cc2)N3CCN(CC3)C4ccc(cc4)C)C(=O)O-1            |
| ZINC01011918 | 5.15  | 1.51              | -11.63           | 0        | 7           | 0      | 442.537         | 8              | CCN1C(=O)/C(=C/c2ccc(c(c2)O)O)OCC(=O)S(=O)(=O)N3C3ccc(cc3)OCC             |
| ZINC00627001 | 4.33  | 13.39             | -51.38           | 1        | 6           | -1     | 440.523         | 6              | Cc1ccc(c1)N2CCN(CC2)C3ccc(cc3)NC(=O)C(=O)C4CCCC4/C(=O)O-1                 |
| ZINC01011914 | 5.71  | 0.13              | -9.2             | 0        | 5           | 0      | 421.316         | 5              | CCN1C(=O)/C(=C/c2ccc(o2)Br)/S(=O)(=O)N3C3ccc(cc3)OCC                      |
| ZINC02165416 | 6.31  | -2.02             | -10.52           | 1        | 5           | 0      | 494.354         | 5              | CCN1C(=O)/C(=C/c2ccc(c(c2)O)O)/S(=O)(=O)N3C3ccc(cc3)OCC                   |
| ZINC01011902 | 6.31  | 0.03              | -11.4            | 0        | 5           | 0      | 461.381         | 6              | CCN1C(=O)/C(=C/c2ccc(c(c2)Br)O)OCC(=O)S(=O)(=O)N3C3ccc(cc3)OCC            |
| ZINC02165373 | 6.15  | 0.93              | -8.75            | 0        | 6           | 0      | 460.983         | 8              | CCN1C(=O)/C(=C/c2ccc(c(c2)O)O)OCC(=O)S(=O)(=O)N3C3ccc(cc3)OCC             |
| ZINC13111165 | 5.03  | 13.26             | -11.93           | 0        | 7           | 0      | 460.559         | 6              | CCOC(=O)c1ccc(cc1)N=C2/N(C(=O)C(=O)C3ccc(n(c3)C4CCCC4)C)/S2)C             |
| ZINC13111165 | 5.03  | 12.86             | -12.16           | 0        | 7           | 0      | 460.559         | 6              | CCOC(=O)c1ccc(cc1)N=C2/N(C(=O)C(=O)C3ccc(n(c3)C4CCCC4)C)/S2)C             |
| ZINC02165312 | 6.05  | 14.88             | -11.09           | 0        | 6           | 0      | 477.561         | 6              | CCOC(=O)c1ccc(cc1)N=C2/N(C(=O)C(=O)C3ccc(n(c3)C4CCCC4)F)C)/S2)C           |
| ZINC02165312 | 6.05  | 15.28             | -10.8            | 0        | 6           | 0      | 477.561         | 6              | CCOC(=O)c1ccc(cc1)N=C2/N(C(=O)C(=O)C3ccc(n(c3)C4CCCC4)F)C)/S2)C           |
| ZINC02165206 | 6.52  | 15.48             | -10.8            | 0        | 6           | 0      | 473.598         | 6              | CCOC(=O)c1ccc(cc1)N=C2/N(C(=O)C(=O)C3ccc(n(c3)C4CCCC4)C)C)/S2)C           |
| ZINC02165206 | 6.52  | 15.88             | -10.76           | 0        | 6           | 0      | 473.598         | 6              | CCOC(=O)c1ccc(cc1)N=C2/N(C(=O)C(=O)C3ccc(n(c3)C4CCCC4)C)C)/S2)C           |
| ZINC08438840 | 7.03  | 1.48              | -14              | 1        | 4           | 0      | 436.507         | 9              | c1ccc(cc1)C0c2ccc(cc2)/C=C/C(=O)C3ccc(cc3)OCC4CCCC4                       |
| ZINC02165295 | 6.21  | 14.93             | -12.77           | 0        | 6           | 0      | 477.561         | 6              | CCOC(=O)c1ccc(cc1)N=C2/N(C(=O)C(=O)C3ccc(n(c3)C4CCCC4)F)C)/S2)C           |
| ZINC02165295 | 6.21  | 15.33             | -12.69           | 0        | 6           | 0      | 477.561         | 6              | CCOC(=O)c1ccc(cc1)N=C2/N(C(=O)C(=O)C3ccc(n(c3)C4CCCC4)F)C)/S2)C           |
| ZINC08438839 | 7.1   | 3.4               | -14.62           | 0        | 4           | 0      | 450.534         | 10             | COc1cc(c(c1)C(=O)C(=O)C2)OCC3CCCC3OCC4CCCC4                               |
| ZINC08438837 | 3.8   | -7.27             | -10.59           | 1        | 6           | 0      | 424.979         | 5              | c1ccc(ccc1)NC(=S)C2c1nc(s2)N3CCOCC3N4CCOCC4Cl                             |
| ZINC02165282 | 4.93  | 1.73              | -12.81           | 0        | 5           | 0      | 451.931         | 6              | COc1ccc(cc1)OCC2CCCC2)/C=C/C3/C(=O)N(C(=O)S3)C4CCCC4)Cl                   |
| ZINC01011872 | 3.77  | -1.06             | -9.32            | 1        | 5           | 0      | 440.702         | 3              | COc1ccc(cc1)Br)/C=C/C2/C(=O)N(C(=O)S2)C3CCCC3)Cl                          |
| ZINC08438833 | 3.02  | 2.58              | -52.38           | 0        | 6           | -1     | 345.286         | 3              | c1ccc(c(c1)C(=O)C2)C3C4C2CCCC4C(=O)OCC3)C(=O)O-1                          |
| ZINC02165265 | 5.17  | 3.52              | -9.15            | 0        | 4           | 0      | 436.964         | 3              | Cc1ccc(c(c1)C)N2c(ccc(c2)C)/C=C/C3/C(=O)N(C(=O)S3)C4CCCC4)Cl)C            |
| ZINC02184622 | 7.01  | 0.86              | -10.03           | 0        | 4           | 0      | 422.509         | 5              | COCC(=O)C1C(=O)C2C3C4C2CCCC3)nsn2)4CCCC4)5CCCC5                           |
| ZINC02165261 | 4.94  | 1.81              | -9.44            | 0        | 4           | 0      | 487.806         | 3              | Cc1ccc(c(c1)C2ccc(cc2)Br)C)/C=C/C3/C(=O)N(C(=O)S3)C4CCCC4)Cl              |
| ZINC08438832 | 6.09  | 1.65              | -13.66           | 0        | 4           | 0      | 426.541         | 4              | C[C@H]1[C@@H]([C@@H]([C@H]1)C2c3nc4ccc4n3)C@H]1(S2)5CCCC5)6CCCC6)C(=O)OCC |
| ZINC02165256 | 4.81  | 2.42              | -9.5             | 0        | 4           | 0      | 443.355         | 3              | Cc1ccc(c(c1)C2ccc(cc2)C)C)/C=C/C3/C(=O)N(C(=O)S3)C4CCCC4)Cl               |
| ZINC08438831 | 6.17  | 0.97              | -10.8            | 1        | 4           | 0      | 426.541         | 5              | CC1=C(S)C([C@H]1C(=O)O)C([C@@H]2C3C4C2CCCC3)nsn2)4CCCC4)5CCCC5            |
| ZINC08438830 | 5.36  | 3.78              | -9.25            | 0        | 4           | 0      | 436.964         | 3              | Cc1ccc(c(c1)N2c(ccc(c2)C)/C=C/C3/C(=O)N(C(=O)S3)C4CCCC4)C)C)C             |
| ZINC00626914 | 5.36  | 1.73              | -11.76           | 0        | 5           | 0      | 438.508         | 4              | COCC(=O)C1=C(S)C([C@H]1C(=O)N3c2nc4ccc4c3)5CCCC5)6CCCC6                   |
| ZINC00626912 | 5.36  | 1.71              | -12.85           | 0        | 5           | 0      | 438.508         | 4              | COCC(=O)C1=C(S)C([C@H]1C(=O)N3c2nc4ccc4c3)5CCCC5)6CCCC6                   |
| ZINC02165251 | 4.68  | 3.72              | -12.37           | 0        | 7           | 0      | 467.934         | 4              | Cc1ccc(ccc1)N2c(ccc(c2)C)/C=C/C3/C(=O)N(C(=O)S3)C4CCCC4)C)C)N+([=O])O-1   |
| ZINC02165246 | 4.46  | 3.41              | -11.61           | 0        | 4           | 0      | 426.9           | 3              | Cc1ccc(c(c1)C2CCCC2)F)C)/C=C/C3/C(=O)N(C(=O)S3)C4CCCC4)Cl                 |
| ZINC02184609 | 5.56  | 2.89              | -25.73           | 1        | 2           | 1      | 428.555         | 3              | c1ccc(cc1)C2=C(C(=O)C)C([C@H]2c4ccc(cc4)C3)N+6CCCC6)7CCCC7                |
| ZINC02165240 | 4.28  | 3.1               | -15.1            | 0        | 7           | 0      | 453.907         | 4              | Cc1ccc(c(c1)C2CCCC2)N+([=O])O-)]C)/C=C/C3/C(=O)N(C(=O)S3)C4CCCC4)Cl       |





**Supplementary Table S2:**  
**Detailed table of XP Docking using Schrodinger's Glide module**

| ZINC_ID      | xLogP | ApolarDesolvation | PolarDesolvation | H Donors | H Acceptors | Charge | MolecularWeight | RotatableBonds | SMILES                                                                                                     |
|--------------|-------|-------------------|------------------|----------|-------------|--------|-----------------|----------------|------------------------------------------------------------------------------------------------------------|
| ZINC08438805 | 8.02  | 0.79              | -14.01           | 0        | 3           | 0      | 635.788         | 4              | c1ccc(cc1)C(=O)[C@@H]2[C@@]3(C=C4c5cccc5C(=O)c6c4cccc6)C@@3([C@@H]7N2c8cccc857)e9cccc9)c1cccc1             |
| ZINC02165060 | 4.46  | 0.97              | -9.18            | 0        | 5           | 0      | 468.756         | 5              | CCOc1c[cc]cc1Br)/C=C\2/C(=O)N(C(=O)S2)c3ccc(cc3)C1)OC                                                      |
| ZINC08438804 | 7.23  | 2.24              | -17.71           | 0        | 4           | 0      | 541.672         | 5              | CC1=C(C2=C([C@@H]3N(c4cccc4S3)[C@@H]([C@@]2[O]1)e5cccc5)C(=O)c6cccc6)e7cccc7)C(=O)C                        |
| ZINC02165054 | 4.45  | 3.08              | -13.22           | 0        | 6           | 0      | 476.941         | 6              | COc1cc[cc]1OCc2cccc2C#N)/C=C\3/C(=O)N(C(=O)S3)c4ccc(cc4)C1                                                 |
| ZINC02165050 | 3.13  | 0.44              | -49.03           | 0        | 7           | -1     | 497.73          | 6              | COc1cc[cc]1OCC(=O)[O-])Br)/C=C\2/C(=O)N(C(=O)S2)c3ccc(cc3)C1                                               |
| ZINC08438803 | 7.23  | 2.74              | -13.66           | 0        | 4           | 0      | 541.672         | 5              | CC1=C(C2=C([C@@H]3N(c4cccc4S3)[C@@H]([C@@]2[O]1)e5cccc5)C(=O)c6cccc6)c7cccc7)C(=O)C                        |
| ZINC01011827 | 3.58  | -1.11             | -8.03            | 1        | 5           | 0      | 440.702         | 3              | COc1cc[cc]1O)Br)/C=C\2/C(=O)N(C(=O)S2)c3ccc(cc3)C1                                                         |
| ZINC08438802 | 3.44  | 6.18              | -29.81           | 1        | 9           | 1      | 506.531         | 9              | COC(=O)C1=C(C(=C([C@@]2([C@@H]1c3cccc4c3c2ccc4)NH+5CCCC5)C(=O)OC)C(=O)OC)C(=O)OC                           |
| ZINC08438800 | 3.44  | 6.42              | -36.34           | 1        | 9           | 1      | 506.531         | 9              | COC(=O)C1=C(C(=C([C@@]2([C@@H]1c3cccc4c3c2ccc4)NH+5CCCC5)C(=O)OC)C(=O)OC)C(=O)OC                           |
| ZINC08438798 | 3.44  | 6.73              | -38.22           | 1        | 9           | 1      | 506.531         | 9              | COC(=O)C1=C(C(=C([C@@]2([C@@H]1c3cccc4c3c2ccc4)NH+5CCCC5)C(=O)OC)C(=O)OC)C(=O)OC                           |
| ZINC08438797 | 3.44  | 6.18              | -30.23           | 1        | 9           | 1      | 506.531         | 9              | COC(=O)C1=C(C(=C([C@@]2([C@@H]1c3cccc4c3c2ccc4)NH+5CCCC5)C(=O)OC)C(=O)OC)C(=O)OC                           |
| ZINC0088170  | 5.19  | -0.33             | -6.89            | 0        | 0           | 0      | 309.988         | 0              | c1cc2cccc3c2c(c1)C(=C3Br)Br                                                                                |
| ZINC00401042 | 2.31  | 3.54              | -7.34            | 1        | 4           | 0      | 178.22          | 2              | c1ccc(cc1)Nc2nms2                                                                                          |
| ZINC02184550 | 1.84  | 6.81              | -9.07            | 1        | 3           | 0      | 224.329         | 1              | C/C=C\1/C(=O)N(C(=S)N1)C2CCCC2                                                                             |
| ZINC02184550 | 1.84  | 6.77              | -9.3             | 1        | 3           | 0      | 224.329         | 1              | C/C=C\1/C(=O)N(C(=S)N1)C2CCCC2                                                                             |
| ZINC04398550 | 5.12  | 11.48             | -47.99           | 1        | 5           | -1     | 455.559         | 6              | c1ccc(cc1)[C@@H]2CC(=C(/C(=N/Cc3ccc4c(c3)OC04)/C2)C(=S)Nc5cccc5)[O-]                                       |
| ZINC08438790 | 5.12  | 11.51             | -48.57           | 1        | 5           | -1     | 455.559         | 6              | c1ccc(cc1)[C@@H]2CC(=C(/C(=N/Cc3ccc4c(c3)OC04)/C2)C(=S)Nc5cccc5)[O-]                                       |
| ZINC08438788 | 5.6   | 0.32              | -46.33           | 2        | 3           | 1      | 428.681         | 0              | C[C@@H]1CC[C@@]2([C@@H]3C[C@@H]4[C@@H]([C@@H]3CC(=O)[C@@H]2C1)CC[C@@H]5[C@@H]4C[NH+6C[C@@H]6[C@@]5(C)O)C)C |
| ZINC08438786 | 5.6   | 0.23              | -45.19           | 2        | 3           | 1      | 428.681         | 0              | C[C@@H]1CC[C@@]2([C@@H]3C[C@@H]4[C@@H]([C@@H]3CC(=O)[C@@H]2C1)CC[C@@H]5[C@@H]4C[NH+6C[C@@H]6[C@@]5(C)O)C)C |
| ZINC08438784 | 5.6   | 0.32              | -44.71           | 2        | 3           | 1      | 428.681         | 0              | C[C@@H]1CC[C@@]2([C@@H]3C[C@@H]4[C@@H]([C@@H]3CC(=O)[C@@H]2C1)CC[C@@H]5[C@@H]4C[NH+6C[C@@H]6[C@@]5(C)O)C)C |
| ZINC08438783 | 5.6   | 0.26              | -46.22           | 2        | 3           | 1      | 428.681         | 0              | C[C@@H]1CC[C@@]2([C@@H]3C[C@@H]4[C@@H]([C@@H]3CC(=O)[C@@H]2C1)CC[C@@H]5[C@@H]4C[NH+6C[C@@H]6[C@@]5(C)O)C)C |
| ZINC01011792 | 4.72  | -2.43             | -13.23           | 1        | 5           | 0      | 408.523         | 7              | Cc1ccc(cc1)CN(CC(=O)Nc2ccf(cc2)C)S(=O)(=O)C3cccc3                                                          |
| ZINC08438782 | 2.88  | 8.9               | -50.43           | 2        | 6           | 1      | 427.908         | 6              | c1ccc(cc1)C(=O)C2=C(C(=O)N)[C@@H]2c3cccc3C)CC[NH+4CCOCC4)O                                                 |
| ZINC08438782 | 2.3   | 9.62              | -57.72           | 1        | 6           | 1      | 427.908         | 6              | c1ccc(cc1)C(=O)[C@@H]2[C@@H]N(C(=O)C2=O)CC[NH+3CCOCC3]c4cccc4C1                                            |
| ZINC08438781 | 2.88  | 8.76              | -46.75           | 2        | 6           | 1      | 427.908         | 6              | c1ccc(cc1)C(=O)C2=C(C(=O)N)[C@@H]2c3cccc3C)CC[NH+4CCOCC4)O                                                 |
| ZINC08438780 | 2.3   | 9.48              | -53.52           | 1        | 6           | 1      | 427.908         | 6              | c1ccc(cc1)C(=O)[C@@H]2[C@@H]N(C(=O)C2=O)CC[NH+3CCOCC3]c4cccc4C1                                            |
| ZINC08438780 | 6.73  | 1.31              | -10.37           | 0        | 5           | 0      | 438.593         | 9              | CCCN1C(=O)/C(=C)c2ccc(c(c2)O)CC(C)C)/SC1=NC3cccc3                                                          |
| ZINC09087398 | 3.93  | 9.73              | -57.73           | 0        | 5           | -1     | 440.317         | 6              | CN(C)c1ccc(cc1)[C@@H]2C(=C(C(=O)N2CC=C)O-)]C(=O)c3ccc(cc3)Br                                               |
| ZINC09087390 | 3.93  | 10.17             | -56.58           | 0        | 5           | -1     | 440.317         | 6              | CN(C)c1ccc(cc1)[C@@H]2C(=C(C(=O)N2CC=C)O-)]C(=O)c3ccc(cc3)Br                                               |
| ZINC01011789 | 3.58  | 2.65              | -17.31           | 0        | 7           | 0      | 447.896         | 8              | CCOc1cc[cc]1OCC(=O)OC)/C=C\2/C(=O)N(C(=O)S2)c3ccc(cc3)C1                                                   |
| ZINC0931361  | 4     | 9.42              | -53.87           | 0        | 4           | -1     | 415.238         | 5              | C=CCN1[C@@H]([C(=C(C1=O)O-)]C(=O)c2ccf(cc2)Br)c3ccc(cc3)F                                                  |
| ZINC02164913 | 4.91  | 1.85              | -9.93            | 0        | 5           | 0      | 430.957         | 7              | CCN(CC)c1ccc(cc1)OCC)/C=C\2/C(=O)N(C(=O)S2)c3ccc(cc3)C1                                                    |
| ZINC09374642 | 4     | 9.35              | -52.4            | 0        | 4           | -1     | 415.238         | 5              | C=CCN1[C@@H]([C(=C(C1=O)O-)]C(=O)c2ccf(cc2)Br)c3ccc(cc3)F                                                  |
| ZINC09374642 | 4.44  | 1.25              | -17.24           | 1        | 4           | 0      | 416.246         | 4              | C=CCN1[C@@H]([C(=C(C1=O)O-)]C(=O)c2ccf(cc2)Br)/O-)]C(=O)c3ccc(cc3)F                                        |
| ZINC09374642 | 3.41  | 0.98              | -10.09           | 0        | 4           | 0      | 416.246         | 5              | C=CCN1[C@@H]([C(=C(C1=O)O-)]C(=O)c2ccf(cc2)Br)c3ccc(cc3)F                                                  |
